# Supplementary material
Source: PubMed Central journal article supplement (PMC10243502)
Supplement: NIHMS1901269-supplement-SI.pdf [file NIHMS1901269-supplement-SI.pdf]

# Supplementary Materials for

## Catalyst-controlled site-selective methylene C–H lactonization of dicarboxylic acids

Hau Sun Sam Chan *et al.*

Corresponding author: Jin-Quan Yu, [yu200@scripps.edu](mailto:yu200@scripps.edu)

### **The PDF file includes:**

Materials and Methods

Figs. S1 to S10

Tables S1 to S15

NMR Spectra

References (39-45)

## Table of Contents

|                                                                                                                                                 |             |
|-------------------------------------------------------------------------------------------------------------------------------------------------|-------------|
| <b>1. General Information .....</b>                                                                                                             | <b>S3</b>   |
| <b>2. Experimental Section for the lactonization reaction .....</b>                                                                             | <b>S4</b>   |
| <b>2.1 Optimization data for the lactonization reactions .....</b>                                                                              | <b>S4</b>   |
| <b>2.2 Reaction procedures of the <math>\beta</math>-directed, <math>\gamma</math>-C–H lactonization reaction .....</b>                         | <b>S13</b>  |
| <b>2.3 Characterization data of products obtained from <math>\beta</math>-directed, <math>\gamma</math>-C–H lactonization reaction.....</b>     | <b>S24</b>  |
| <b>2.4 Synthesis and characterization of substrates for <math>\beta</math>-directed, <math>\gamma</math>-C–H lactonization reaction.....</b>    | <b>S48</b>  |
| <b>2.5 Reaction procedures of the <math>\gamma</math>-directed, <math>\gamma</math>-C–H lactonization reaction .....</b>                        | <b>S79</b>  |
| <b>2.6 Characterization data of products obtained from <math>\gamma</math>-directed, <math>\gamma</math>-C–H lactonization reaction.....</b>    | <b>S83</b>  |
| <b>2.7 Synthesis and characterization of substrates for the <math>\gamma</math>-directed, <math>\gamma</math>-C–H lactonization reaction...</b> | <b>S99</b>  |
| <b>2.8 Preliminary mechanistic studies.....</b>                                                                                                 | <b>S105</b> |
| <b>3. Derivatization of lactone products .....</b>                                                                                              | <b>S110</b> |
| <b>4. NMR Spectra .....</b>                                                                                                                     | <b>S125</b> |
| <b>5. References .....</b>                                                                                                                      | <b>S277</b> |

## 1. General Information

Pd(OAc)<sub>2</sub> was purchased from Strem. Solvents were obtained from Sigma-Aldrich, Alfa-Aeser, and Acros, and used directly without further purification. Other reagents were purchased at the highest commercial quality and used without further purification, unless otherwise stated. Analytical thin layer chromatography was performed on 0.25 mm silica gel 60F254 or Merck pre-coated aluminium-backed silica gel F254 plates. <sup>1</sup>H NMR spectra were recorded on Bruker AMX-400, Bruker AV-500, or Bruker DRX-600 instruments. The following abbreviations (or combinations thereof) were used to explain multiplicities: s = singlet, d = doublet, t = triplet, q = quartet, m = multiplet, br = broad. Coupling constants, *J*, were reported in Hertz unit (Hz). <sup>13</sup>C NMR spectra were recorded on Bruker AMX-400, Bruker AV-500, or Bruker DRX-600 and were fully decoupled by broad band proton decoupling. Chemical shifts were referenced to the appropriate residual solvent peaks. Column chromatography was performed using E. Merck silica (60, particle size 0.043–0.063 mm), and pTLC was performed on Merck silica plates (60F254). High-resolution mass spectra (HRMS) were recorded on an Agilent Mass spectrometer using ESI-TOF (electrospray ionization-time of flight).

## 2. Experimental Section for the lactonization reaction

### 2.1 Optimization data for the lactonization reactions

#### 1. Ligand investigation for $\beta$ -directed, $\gamma$ -lactonization:

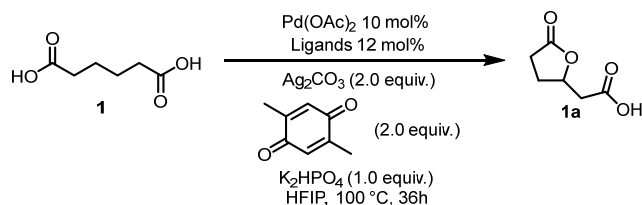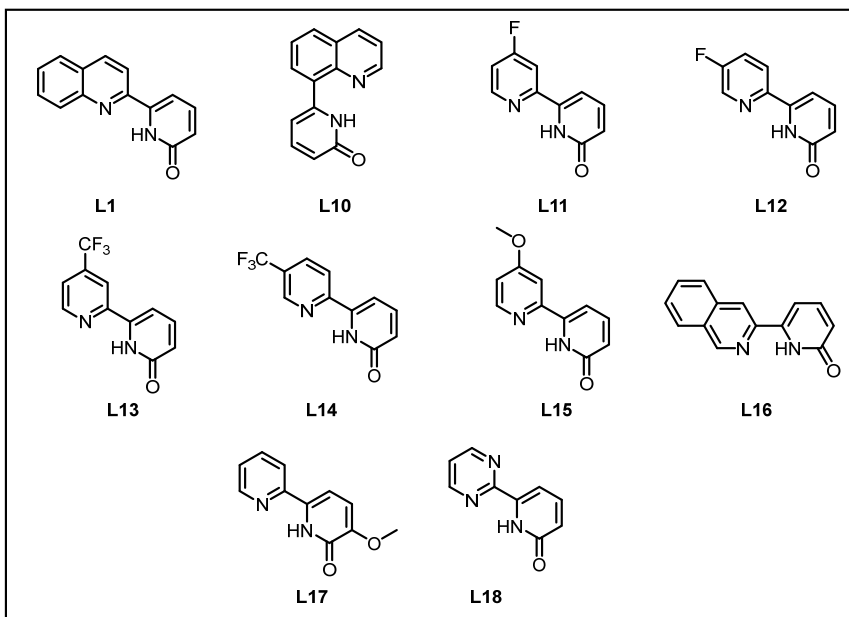

| Ligand | Lactone NMR yield (%) | Ligand | Lactone NMR yield (%) |
|--------|-----------------------|--------|-----------------------|
| L1     | 45                    | L16    | 9                     |
| L11    | 16                    | L17    | 28                    |
| L12    | 6                     | L18    | 34                    |
| L13    | 19                    | L1     | 10                    |
| L14    | 19                    | L10    | 12                    |
| L15    | 6                     | No L   | 3                     |

**Table S1.** Ligand investigation for  $\beta$ -directed,  $\gamma$ -lactonization.

**Note:** See below for the optimization data leading to the selection of Ag<sub>2</sub>CO<sub>3</sub>, *p*-xyloquinone, and K<sub>2</sub>HPO<sub>4</sub> as the reagents. The optimization process for all the lactonization reactions were carried out simultaneously, with greater focus on the  $\gamma$ -directed,  $\gamma$ -lactonization reaction due to its novelty.

All ligands employed for the exploratory studies are prepared according to literature procedure.<sup>(13, 39)</sup>

## 2. Fine-tuning of reaction conditions for $\beta$ -directed, $\gamma$ -lactonization:

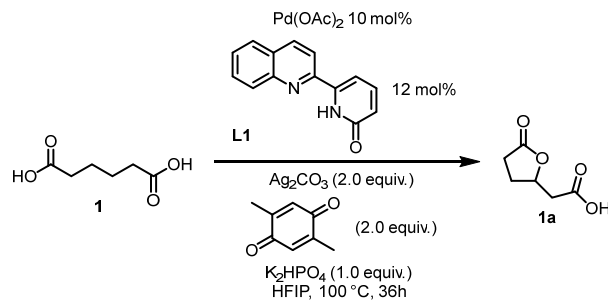

| Deviations from reaction condition as shown                                                                                                                                                                | Lactone NMR yield (%) |
|------------------------------------------------------------------------------------------------------------------------------------------------------------------------------------------------------------|-----------------------|
| No deviation (Reaction vessel: 10 mL vial)                                                                                                                                                                 | 45                    |
| Reaction vessel: 8 mL vial                                                                                                                                                                                 | 65                    |
| 0.75 equiv. $\text{K}_2\text{HPO}_4$ (Reaction vessel: 8 mL vial)                                                                                                                                          | 65                    |
| 0.35. equiv. $\text{K}_2\text{HPO}_4$ + 0.4 equiv. $\text{CsOAc}$ , (Reaction vessel: 8 mL vial)                                                                                                           | 72                    |
| Silver free condition: $\text{MnO}_2$ (4.0 equiv.) instead of $\text{Ag}_2\text{CO}_3$ (2.0 equiv.), $\text{K}_2\text{HPO}_4$ : $\text{KH}_2\text{PO}_4$ : $\text{CsOAc}$ (1.0:1.5:1.0, 0.75 equiv. total) | 46                    |

**Table S2.** Fine-tuning of reaction conditions for  $\beta$ -directed,  $\gamma$ -lactonization.

### 3. Ligand investigation for $\gamma$ -directed, $\gamma$ -lactonization:

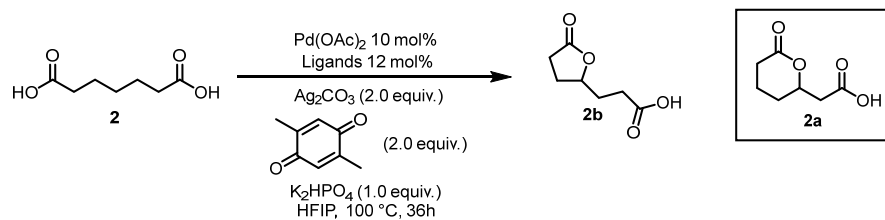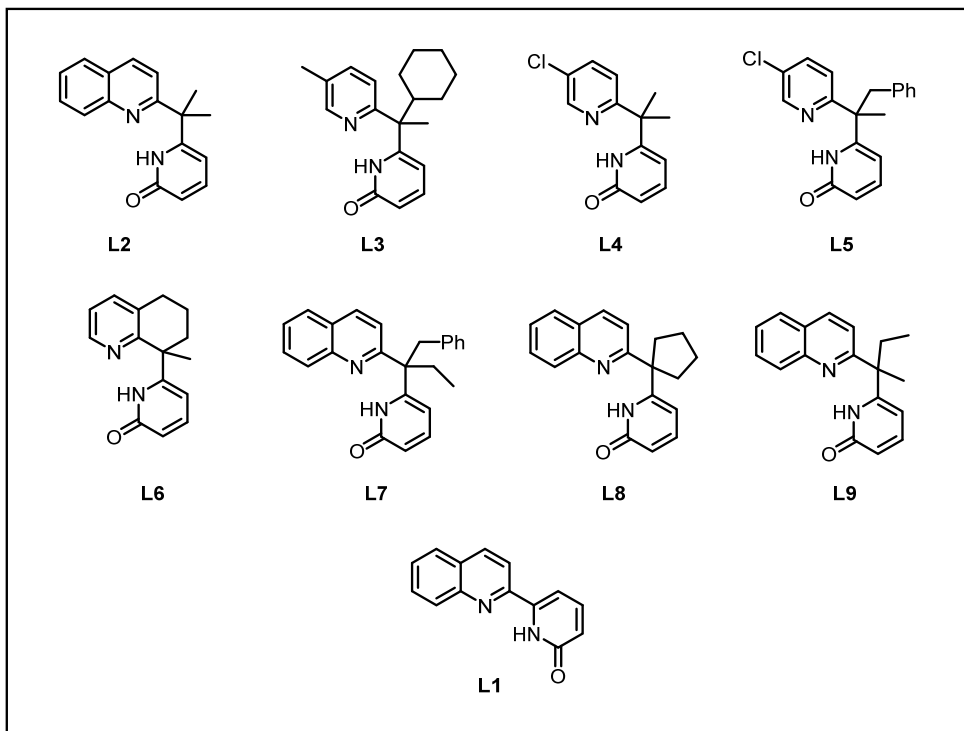

| Ligand | Lactone NMR yield (%) | Ligand | Lactone NMR yield (%) |
|--------|-----------------------|--------|-----------------------|
| L2     | 52                    | L7     | 26                    |
| L3     | 0                     | L8     | 35                    |
| L4     | 20                    | L9     | 50                    |
| L5     | 21                    | L1     | 13 ( <b>2a</b> )      |
| L6     | 13                    | No L   | 0                     |

Table S3. Ligand investigation for  $\gamma$ -directed,  $\gamma$ -lactonization.

#### 4. Investigation of oxidants for $\gamma$ -directed, $\gamma$ -lactonization:

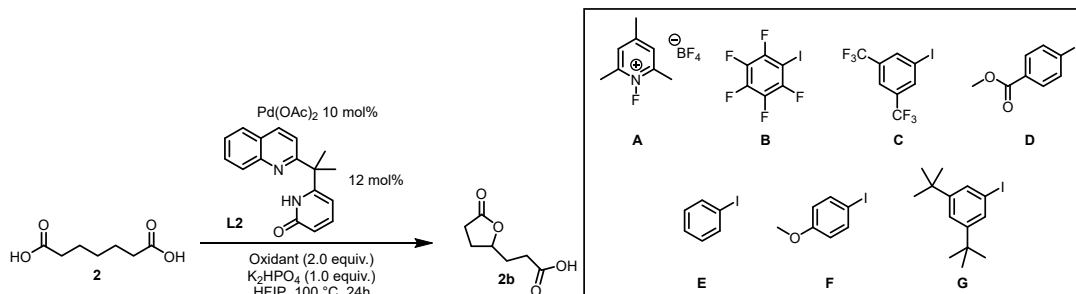

| Oxidant                                                            | NMR yield of <b>2b</b> (%) | Oxidant                                       | NMR yield of <b>2b</b> (%) |
|--------------------------------------------------------------------|----------------------------|-----------------------------------------------|----------------------------|
| TBHP in H <sub>2</sub> O                                           | 2                          | BzOO <sup>t</sup> Bu                          | 8                          |
| CMHP                                                               | 5                          | BzOOBz                                        | 0                          |
| Na <sub>2</sub> CO <sub>3</sub> •1.5 H <sub>2</sub> O <sub>2</sub> | 0                          | Lauroyl peroxide                              | 0                          |
| H <sub>2</sub> O <sub>2</sub> in H <sub>2</sub> O                  | 2                          | <sup>t</sup> BuOO <sup>t</sup> Bu             | 5                          |
| H <sub>2</sub> O <sub>2</sub> •urea                                | 0                          | <i>m</i> CPBA                                 | 0                          |
| AcOO <sup>t</sup> Bu                                               | 7                          | Na <sub>2</sub> S <sub>2</sub> O <sub>8</sub> | 12                         |
| K <sub>2</sub> S <sub>2</sub> O <sub>8</sub>                       | 11                         | DMP                                           | 0                          |
| (TBA) <sub>2</sub> S <sub>2</sub> O <sub>8</sub>                   | 0                          | <b>B</b>                                      | 4                          |
| Oxone                                                              | 0                          | <b>C</b>                                      | 5                          |
| NFSI                                                               | 0                          | <b>D</b>                                      | 5                          |
| <b>A</b>                                                           | 0                          | <b>E</b>                                      | 0                          |
| Selectfluor                                                        | 0                          | <b>F</b>                                      | 0                          |
| Selectfluor 2                                                      | 0                          | <b>G</b>                                      | 0                          |
| PIDA                                                               | 0                          | I <sub>2</sub>                                | 0                          |
| PIFA                                                               | 0                          | Ce(SO <sub>4</sub> ) <sub>2</sub>             | 6                          |

**Table S4.** Investigation of oxidants for  $\gamma$ -directed,  $\gamma$ -lactonization.

## 5. Investigation of palladium source for $\gamma$ -directed, $\gamma$ -lactonization:

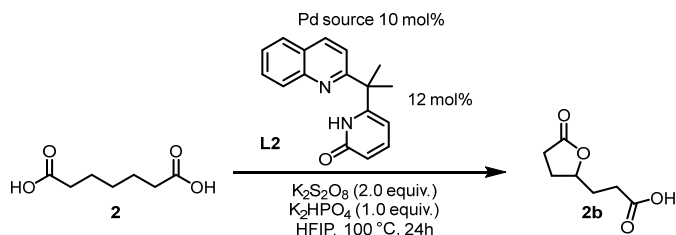

| Palladium source                                      | NMR yield of 2b (%) |
|-------------------------------------------------------|---------------------|
| Pd(OAc) <sub>2</sub>                                  | 11                  |
| PdCl <sub>2</sub> (MeCN) <sub>2</sub>                 | 2                   |
| Pd(MeCN) <sub>4</sub> (BF <sub>4</sub> ) <sub>2</sub> | 8                   |
| PdCl <sub>2</sub> (PhCN) <sub>2</sub>                 | 3                   |
| Pd(TFA) <sub>2</sub>                                  | 13                  |
| Pd <sub>2</sub> (dba) <sub>3</sub>                    | 3                   |
| PdCl <sub>2</sub>                                     | 4                   |
| Pd(MeCN) <sub>4</sub> (OTf) <sub>2</sub>              | 7                   |

**Table S5.** Investigation of palladium source for  $\gamma$ -directed,  $\gamma$ -lactonization.

## 6. General control experiments for $\gamma$ -directed, $\gamma$ -lactonization:

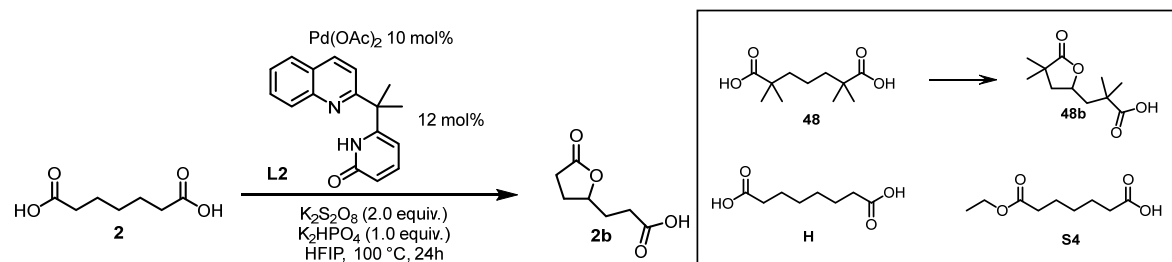

| Deviations from reaction condition as shown     | NMR yield of lactone (%) |
|-------------------------------------------------|--------------------------|
| No Palladium                                    | 0                        |
| No Ligand                                       | 0                        |
| No K <sub>2</sub> HPO <sub>4</sub>              | 0                        |
| 2.0 equiv. K <sub>2</sub> HPO <sub>4</sub>      | 11                       |
| No K <sub>2</sub> S <sub>2</sub> O <sub>8</sub> | 4                        |
| 30% Pd and Ligand                               | 5                        |
| With <b>48</b> as substrate                     | 21 (of <b>48b</b> )      |
| With <b>H</b> as substrate                      | 0                        |
| With <b>S4</b> as substrate                     | 0                        |

**Table S6.** General control experiments for  $\gamma$ -directed,  $\gamma$ -lactonization.



## 7. Investigation of other oxidants for $\gamma$ -directed, $\gamma$ -lactonization:

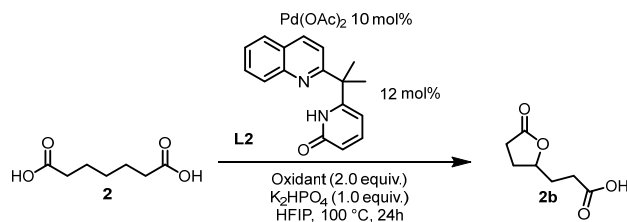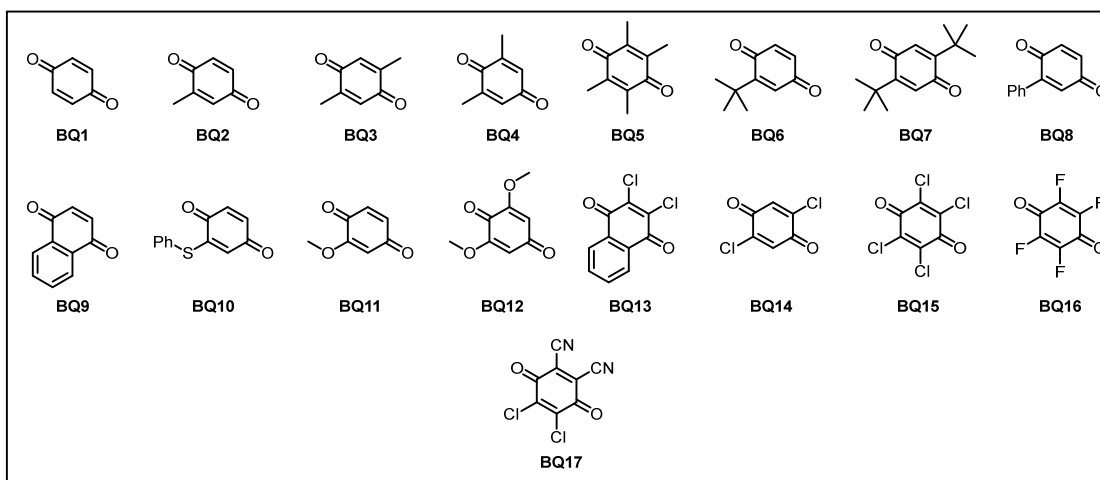

| Oxidant                                         | NMR yield of <b>2b</b> (%) | Oxidant | NMR yield of <b>2b</b> (%) |
|-------------------------------------------------|----------------------------|---------|----------------------------|
| AgTFA                                           | 0                          | BQ1     | 9                          |
| AgNO <sub>3</sub>                               | 7                          | BQ2     | 7                          |
| Ag <sub>2</sub> O                               | 15                         | BQ3     | 19                         |
| AgF                                             | 14                         | BQ4     | 13                         |
| AgOAc                                           | 17                         | BQ5     | 16                         |
| Ag <sub>3</sub> PO <sub>4</sub>                 | 7                          | BQ6     | 10                         |
| Ag <sub>2</sub> CO <sub>3</sub>                 | 13                         | BQ7     | 4                          |
| Cu(OAc) <sub>2</sub>                            | 0                          | BQ8     | 20                         |
| CuSO <sub>4</sub> •5H <sub>2</sub> O            | 3                          | BQ9     | 5                          |
| CuF <sub>2</sub>                                | 2                          | BQ10    | 0                          |
| CuO                                             | 2                          | BQ11    | 4                          |
| CuBr <sub>2</sub>                               | 1                          | BQ12    | 9                          |
| CuCl <sub>2</sub>                               | 0                          | BQ13    | 3                          |
| Cu(ClO <sub>4</sub> ) <sub>2</sub>              | 0                          | BQ14    | 0                          |
| Cu <sub>3</sub> (PO <sub>4</sub> ) <sub>2</sub> | 2                          | BQ15    | 0                          |
| CuCO <sub>3</sub>                               | 1                          | BQ16    | 0                          |
|                                                 |                            | BQ17    | 0                          |

Table S7. Investigation of other oxidants for  $\gamma$ -directed,  $\gamma$ -lactonization.

**8. Investigation of reaction conditions with silver salts and BQ3 for  $\gamma$ -directed,  $\gamma$ -lactonization:**

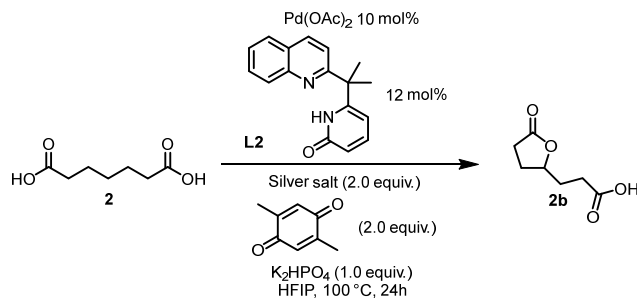

| Silver salts                    | NMR yield of <b>2b</b> (%) |
|---------------------------------|----------------------------|
| AgOAc                           | 23                         |
| Ag <sub>2</sub> O               | 27                         |
| AgF                             | 29                         |
| Ag <sub>3</sub> PO <sub>4</sub> | 41                         |
| Ag <sub>2</sub> CO <sub>3</sub> | 52                         |

**Table S8.** Investigation of reaction conditions with silver salts for  $\gamma$ -directed,  $\gamma$ -lactonization.

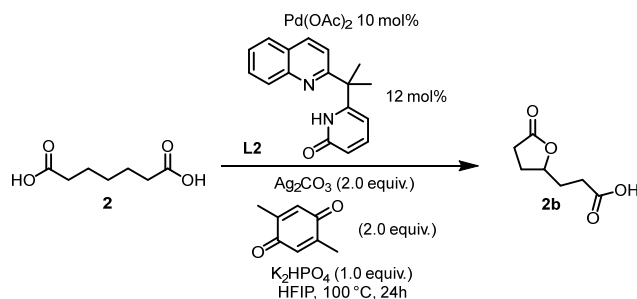

| Deviations from reaction condition as shown                                               | NMR yield of <b>2b</b> (%) |
|-------------------------------------------------------------------------------------------|----------------------------|
| Replace Ag <sub>2</sub> CO <sub>3</sub> with K <sub>2</sub> CO <sub>3</sub>               | 0                          |
| Replace Ag <sub>2</sub> CO <sub>3</sub> with K <sub>2</sub> S <sub>2</sub> O <sub>8</sub> | 34                         |
| 0.5 equiv. BQ3 + 0.5 equiv. Ag <sub>2</sub> CO <sub>3</sub>                               | 26                         |
| 1.0 equiv. BQ3 + 1.0 equiv. Ag <sub>2</sub> CO <sub>3</sub>                               | 28                         |
| Reaction temperature at 80 °C                                                             | 40                         |
| Reaction temperature at 120 °C                                                            | 35                         |
| Reaction time: 12h                                                                        | 35                         |
| Reaction time: 36h                                                                        | 52                         |
| Reaction time: 72h                                                                        | 45                         |

**Table S9.** Investigation of reaction conditions with **BQ3** for  $\gamma$ -directed,  $\gamma$ -lactonization.

## 9. Further fine-tuning of reaction conditions for $\gamma$ -directed, $\gamma$ -lactonization:

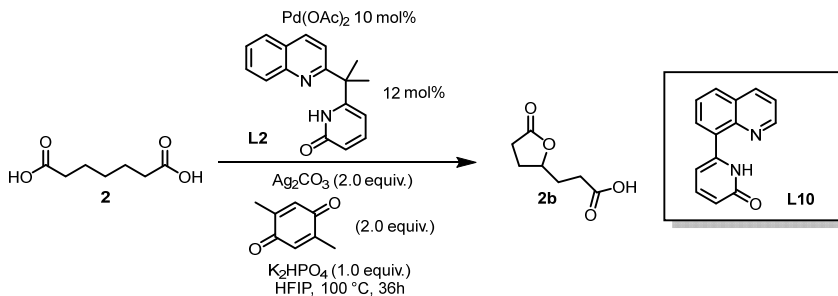

| Deviations from reaction condition as shown                                                                                                        | Lactone NMR yield (%) |
|----------------------------------------------------------------------------------------------------------------------------------------------------|-----------------------|
| No deviation (Reaction vessel: 10 mL vial)                                                                                                         | 52                    |
| Reaction vessel: 8 mL vial                                                                                                                         | 58                    |
| 0.75 equiv. K <sub>2</sub> HPO <sub>4</sub> (Reaction vessel: 8 mL vial)                                                                           | 60                    |
| 0.35. equiv. K <sub>2</sub> HPO <sub>4</sub> + 0.4 equiv. CsOAc, (Reaction vessel: 8 mL vial)                                                      | 65                    |
| 0.35. equiv. K <sub>2</sub> HPO <sub>4</sub> + 0.4 equiv. CsOAc, <b>L10</b> instead of <b>L2</b> , (Reaction vessel: 8 mL vial)                    | 69                    |
| 0.35. equiv. K <sub>2</sub> HPO <sub>4</sub> + 0.4 equiv. CsOAc, <b>L10</b> instead of <b>L2</b> , 48h reaction time, (Reaction vessel: 8 mL vial) | 75                    |

**Table S10.** Further fine-tuning of reaction conditions for  $\gamma$ -directed,  $\gamma$ -lactonization.

**10. Optimization for silver-free reaction conditions using MnO<sub>2</sub> as oxidant for  $\gamma$ -directed,  $\gamma$ -lactonization:**

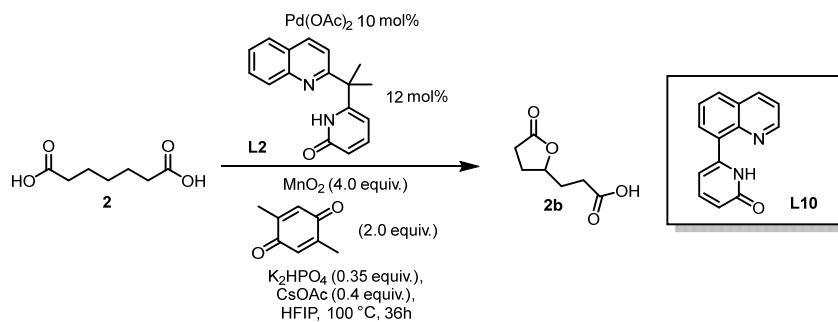

| Deviations from reaction condition as shown                                                                                                                     | Lactone NMR yield (%) |
|-----------------------------------------------------------------------------------------------------------------------------------------------------------------|-----------------------|
| No deviation (Reaction vessel: 8 mL vial)                                                                                                                       | 46                    |
| 2.0 equiv. MnO <sub>2</sub>                                                                                                                                     | 17                    |
| 6.0 equiv. MnO <sub>2</sub>                                                                                                                                     | 40                    |
| K <sub>2</sub> HPO <sub>4</sub> :KH <sub>2</sub> PO <sub>4</sub> :CsOAc (1:1.5:1, total 0.75 equiv.)                                                            | 60                    |
| K <sub>2</sub> HPO <sub>4</sub> :KH <sub>2</sub> PO <sub>4</sub> :CsOAc (1:1.5:1, total 1.0 equiv.)                                                             | 34                    |
| K <sub>2</sub> HPO <sub>4</sub> :KH <sub>2</sub> PO <sub>4</sub> :CsOAc (1:2:1, total 0.75 equiv.)                                                              | 24                    |
| K <sub>2</sub> HPO <sub>4</sub> :KH <sub>2</sub> PO <sub>4</sub> :CsOAc (1:2:1, total 1.0 equiv.)                                                               | 7                     |
| Reaction time 48h                                                                                                                                               | 38                    |
| <b>L10</b> instead of <b>L2</b> ,<br>K <sub>2</sub> HPO <sub>4</sub> :KH <sub>2</sub> PO <sub>4</sub> :CsOAc (1:1.5:1, total 0.75 equiv.)                       | 62                    |
| <b>L10</b> instead of <b>L2</b> ,<br>K <sub>2</sub> HPO <sub>4</sub> :KH <sub>2</sub> PO <sub>4</sub> :CsOAc (1:1.5:1, total 0.75 equiv.),<br>48h reaction time | 65                    |

**Table S11.** Optimization for silver-free reaction conditions using MnO<sub>2</sub> as oxidant for  $\gamma$ -directed,  $\gamma$ -lactonization.

## 2.2 Reaction procedures of the $\beta$ -directed, $\gamma$ -C–H lactonization reaction

### General procedure for the $\beta$ -directed, $\gamma$ -C–H lactonization reaction using $\text{Ag}_2\text{CO}_3$ as oxidant

**A pictorial guide is also provided below to assist reaction set-up, work-up, and analysis.**

To a 2-dram vial was added the substrate (0.1 mmol),  $\text{Pd}(\text{OAc})_2$  (10 mol%, 0.01 mmol), ligand (12 mol%, 0.012 mmol), *p*-xyloquinone (0.2 mmol),  $\text{Ag}_2\text{CO}_3$  (0.2 mmol),  $\text{K}_2\text{HPO}_4$  (0.035 mmol) and  $\text{CsOAc}$  (0.04 mmol, preferably added from a stock solution in HFIP as  $\text{CsOAc}$  is hygroscopic). HFIP (1.0 mL, or the volume needed to make up to 1.0 mL if a stock solution of  $\text{CsOAc}$  was used) and a stir-bar was then added, followed by sealing the reaction vessel with a PTFE septum inserted between the vial and its cap. (**Note:  $\text{Pd}(\text{OAc})_2$ , ligand, *p*-xyloquinone,  $\text{CsOAc}$ , and the substrate could all be prepared as a stock solution in HFIP. The use of stock solution is recommended for setting up a series of reactions to maximize work efficiency**). The reaction mixture was sonicated for 30 seconds before stirring at 200 rpm and 100 °C (heating block temperature) for 36 hours. The reaction mixture was then cooled to room temperature and diluted with dichloromethane (1.0 mL), followed by addition of deionized water (2.0 mL), aq. 6M HCl (0.3 mL), brine (1.0 mL) and then shaken vigorously. The lower organic layer was carefully pipetted and filtered through a short plug of Celite®. The remaining aqueous layer was extracted with  $\text{CH}_2\text{Cl}_2$  (1.0 mL) twice and the organic layer was pipetted and filtered as mentioned. The combined organic layer was then evaporated to dryness. The crude was then taken into  $\text{CDCl}_3$  (0.6 mL) with  $\text{CH}_2\text{Br}_2$  (10.0  $\mu\text{L}$ ) as the internal standard to determine the assay yield of the reaction by  $^1\text{H}$  NMR spectroscopy. The isolation of the product was carried out with aqueous extractions of the organic layer (in 0.6 mL  $\text{CDCl}_3$  diluted with 2.0 mL  $\text{CH}_2\text{Cl}_2$ ) with sat. aq.  $\text{NaHCO}_3$  solution (1.0 mL each, 3 times). The collected aqueous layer was then acidified by aq. 6M HCl to pH ~ 2 and extracted with EtOAc (1.0 mL, 3 times). The combined EtOAc layers was dried with anhydrous  $\text{MgSO}_4$ , filtered, and evaporated to dryness. The product was either further purified by column chromatography (General procedure for gradient elution unless stated otherwise: begin with 20% EtOAc/hexane + 1% AcOH, and increase the composition of EtOAc by 10% for every 8 mL of eluent used to 100% EtOAc + 1% AcOH, collecting 1.0-2.0 mL fractions. It was observed that the  $R_f$  values of carboxylic acids obtained by TLC analysis could not be directly used as a guide for column chromatography. Hence, the gradient elution method was employed for their purification.) or pTLC (exact eluent composition mentioned below for each example) or subject to further derivatization into benzyl esters for isolation if purification of the lactone acid was found to be not straightforward.

### Procedure for the gram scale $\beta$ -directed, $\gamma$ -C–H lactonization reaction of adipic acid 1 using $\text{Ag}_2\text{CO}_3$ as oxidant

To a 150 mL heavy wall pressure vessel with an internal thread (see picture below) was added adipic acid (1.0 g, 6.84 mmol),  $\text{Pd}(\text{OAc})_2$  (153.0 mg, 0.68 mmol), ligand (151.0 mg, 0.68 mmol), *p*-xyloquinone (1.87 g, 13.7 mmol),  $\text{Ag}_2\text{CO}_3$  (3.78 g, 13.7 mmol),  $\text{K}_2\text{HPO}_4$  (416.0 mg, 2.39 mmol) and  $\text{CsOAc}$  (524.0 mg, 2.73 mmol, a stock solution is not required). HFIP (68.0 mL) and a stir-bar was then added, followed by sealing the reaction vessel with a screwed-on PTFE bushing. The reaction mixture was sonicated for **5 minutes** before stirring at **500 rpm** and 100 °C (oil bath temperature) for 36 hours. The reaction mixture was then cooled to room temperature and formic acid (5.0 mL) was added, followed by filtration through a short plug of Celite®. The filtrate was then concentrated under reduced pressure. The crude was dissolved in  $\text{CH}_2\text{Cl}_2$  (20.0 mL) and extracted with sat. aq.  $\text{NaHCO}_3$  (10.0 mL, 3 times). The aqueous layer was collected and combined, acidified by aq. 6M HCl to pH ~

2 (slow addition of acid with vigorous stirring is recommended) and extracted with EtOAc (10.0 mL, 3 times). The combined EtOAc layers was dried with anhydrous MgSO<sub>4</sub>, filtered, and evaporated to dryness. The product was purified by column chromatography (Begin with 50% EtOAc/hexane + 1% AcOH (300 mL), then 75% EtOAc/hexane + 1% AcOH (300 mL), and finally 100% EtOAc + 1% AcOH (300 mL)). The desired product **1a** was isolated as a straw-coloured oil (607.3 mg, 4.21 mmol, 62%).

#### Experimental observation:

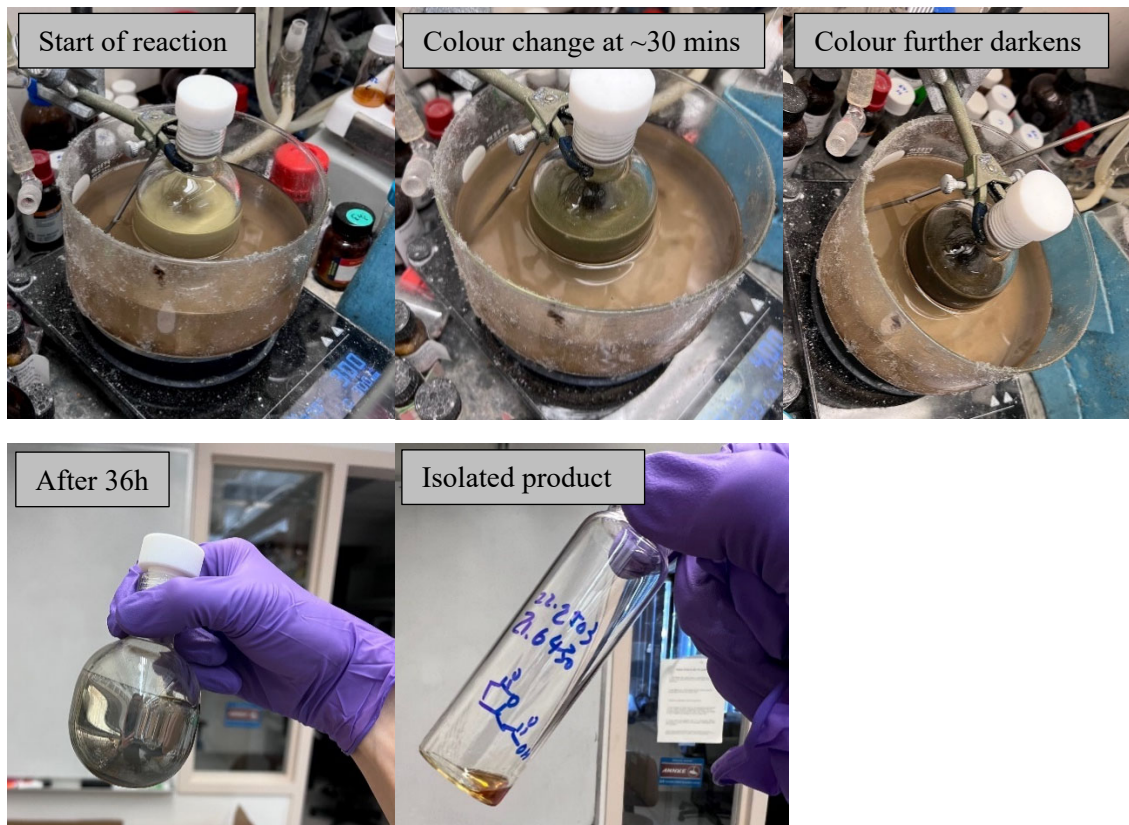

#### General procedure for the $\beta$ -directed, $\gamma$ -C–H lactonization reaction using MnO<sub>2</sub> as oxidant

To a 2-dram vial was added the substrate (0.1 mmol), Pd(OAc)<sub>2</sub> (10 mol%, 0.01 mmol), ligand (12 mol%, 0.012 mmol), *p*-xyloquinone (0.2 mmol), MnO<sub>2</sub> (0.4 mmol), K<sub>2</sub>HPO<sub>4</sub> (0.021 mmol), KH<sub>2</sub>PO<sub>4</sub> (0.032 mmol), CsOAc (0.021 mmol, preferably added from a stock solution in HFIP as CsOAc is hygroscopic). HFIP (1.0 mL, or the volume needed to make up to 1.0 mL if a stock solution of CsOAc was used) and a stir-bar was then added, followed by sealing the reaction vessel with a PTFE septum inserted between the vial and its cap. (**Note: Pd(OAc)<sub>2</sub>, ligand, *p*-xyloquinone, CsOAc, and the substrate could all be prepared as a stock solution in HFIP. The use of stock solution is recommended for setting up a series of reactions to maximize work efficiency**). The reaction mixture was sonicated for 30 seconds before stirring at 200 rpm and 100 °C (heating block temperature) for 36-48 hours. The reaction mixture was then cooled to room temperature and diluted with dichloromethane (1.0 mL), followed by addition of deionized water (2.0 mL), aq. 6M HCl (0.3 mL), brine (1.0 mL) and then shaken vigorously. The lower organic layer was carefully pipetted and filtered through a short plug of Celite®. The remaining aqueous layer was extracted with CH<sub>2</sub>Cl<sub>2</sub> (1.0 mL)

twice and the organic layer was pipetted and filtered as mentioned. The combined organic layer was then evaporated to dryness. The crude was then taken into  $\text{CDCl}_3$  (0.6 mL) with  $\text{CH}_2\text{Br}_2$  (10.0  $\mu\text{L}$ ) as the internal standard to determine the assay yield of the reaction by  $^1\text{H}$  NMR spectroscopy. The isolation of the product was carried out with aqueous extractions of the organic layer (in 0.6 mL  $\text{CDCl}_3$  diluted with 2.0 mL  $\text{CH}_2\text{Cl}_2$ ) with sat. aq.  $\text{NaHCO}_3$  solution (1.0 mL each, 3 times). The collected aqueous layer was then acidified by aq. 6M  $\text{HCl}$  to  $\text{pH} \sim 2$  and extracted with  $\text{EtOAc}$  (1.0 mL, 3 times). The combined  $\text{EtOAc}$  layers was dried with anhydrous  $\text{MgSO}_4$ , filtered, and evaporated to dryness. The product was either further purified by column chromatography (General procedure for gradient elution unless stated otherwise: begin with 20%  $\text{EtOAc}$ /hexane + 1%  $\text{AcOH}$ , and increase the composition of  $\text{EtOAc}$  by 10% for every 8 mL of eluent used to 100%  $\text{EtOAc}$  + 1%  $\text{AcOH}$ , collecting 1.0-2.0 mL fractions. It was observed that the  $R_f$  values of carboxylic acids obtained by TLC analysis could not be directly used as a guide for column chromatography. Hence, the gradient elution method was employed for their purification.) or pTLC (exact eluent composition mentioned below for each example) or subject to further derivatization into benzyl esters for isolation if purification of the lactone acid was found to be not straightforward.

**Note:** Using the correct type of  $\text{MnO}_2$  is crucial for reproducibility.  $\text{MnO}_2$  (mesh, on the left) was found to be more active for this reaction than  $\text{MnO}_2$  (powder, on the right).

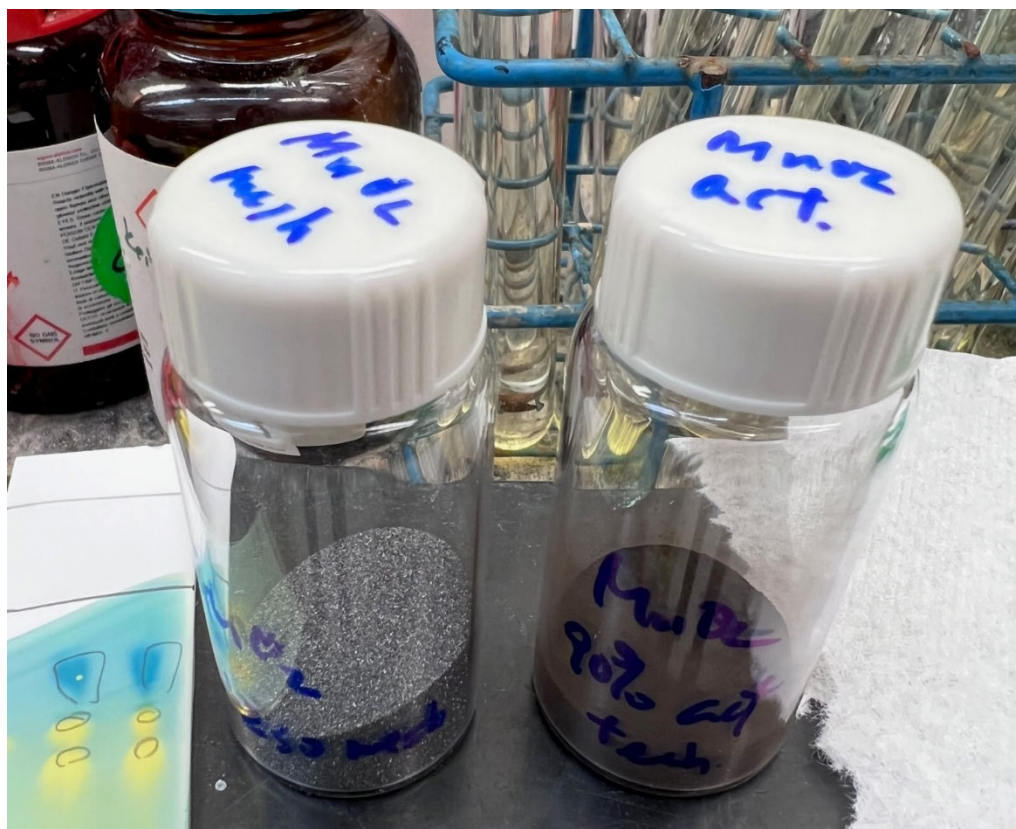

### General procedure for benzyl ester formation

To the product obtained after aqueous extraction with sat.  $\text{NaHCO}_3$  solution as mentioned above was added dry  $\text{CH}_2\text{Cl}_2$  (2.0 mL),  $\text{BnOH}$  (1.2 eq.),  $\text{DMAP}$  (1.2 eq.) and  $\text{EDCI}$  (1.2 eq.) sequentially at room temperature. The reaction mixture was stirred at room temperature overnight, and completion of the reaction was confirmed by TLC analysis of the reaction mixture. The reaction mixture was then

quenched by the addition of water and extracted with  $\text{CH}_2\text{Cl}_2$  (3 times), and the desired product was purified by pTLC (exact eluent composition mentioned below for each example).



**A pictorial guide for reaction set-up, work-up, and expected observations (Applicable to both  $\beta$ -directed and  $\gamma$ -directed lactonization reactions).**

**Scenario:** Setting up 4 reactions for the conversion of pimelic acid **2** to lactone **2b**.

1. Weigh Pd(OAc)<sub>2</sub> (5.0 eq., to be dissolved in 1.0 mL HFIP), pimelic acid **2** (5.0 eq., to be dissolved in 1.0 mL HFIP), Ligand **L2** (5.0 eq., to be dissolved in 1.0 mL HFIP. Vial is labelled L1 in the picture, but it is ligand **L2** that was used), *p*-xyloquinone (4.0 eq., to be dissolved in 0.8 mL HFIP), and CsOAc (5.0 eq., to be dissolved into 1.0 mL HFIP) into 5 separate vials.

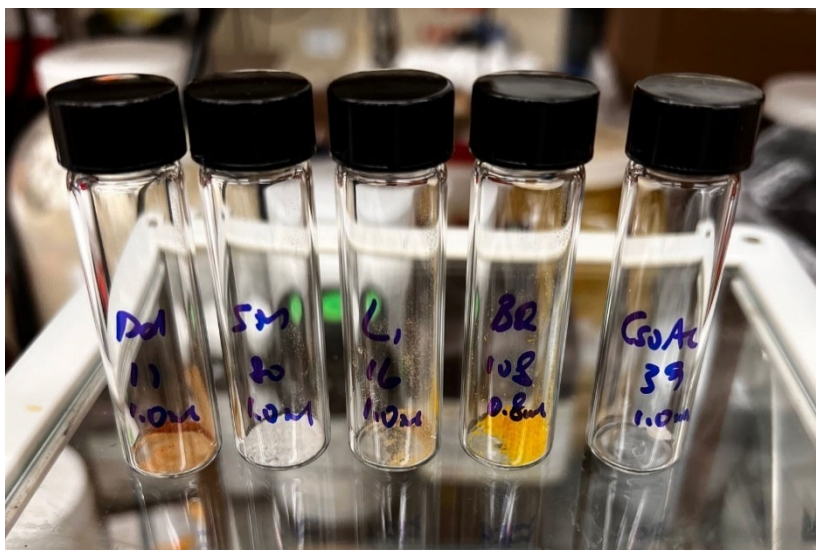

2. Weigh Ag<sub>2</sub>CO<sub>3</sub> (2.0 eq. each), and K<sub>2</sub>HPO<sub>4</sub> (0.35 eq. each) into 4 separate 2-dram vials, whereby each serves as the reaction vessel.

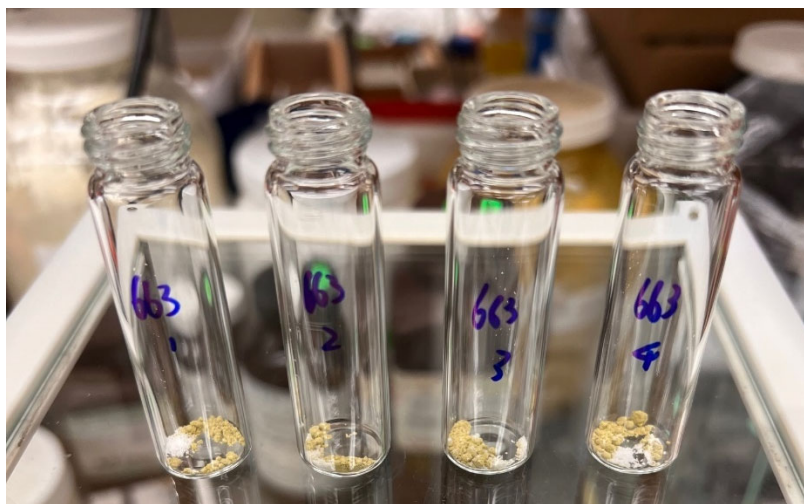

3. Add the required volume of HFIP into the vials containing Pd(OAc)<sub>2</sub> (1.0 mL), pimelic acid **2** (1.0 mL), ligand **L2** (1.0 mL), *p*-xyloquinone (0.8 mL), and CsOAc (1.0 mL). It is recommended to sonicate the mixture to facilitate dissolution of the solids to obtain homogenous solutions.

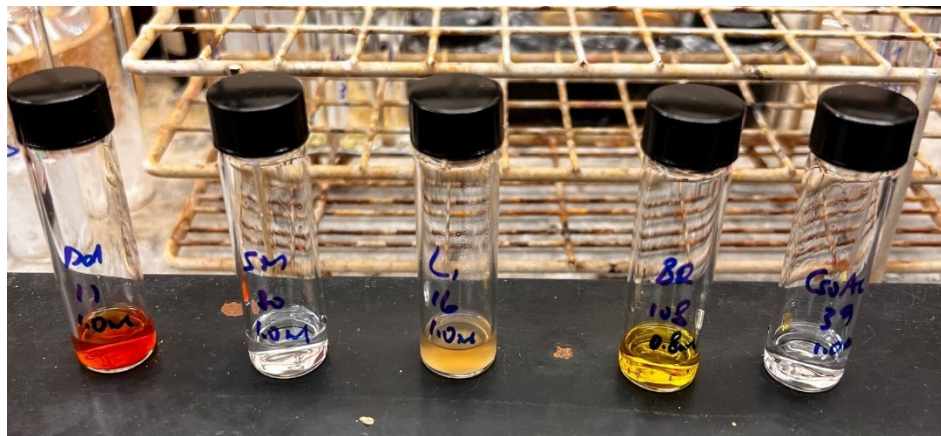

4. Use an autopipette or a syringe to add 0.2 mL each of the Pd(OAc)<sub>2</sub>, pimelic acid **2**, ligand **L2**, *p*-xyloquinone, and CsOAc solutions into the 4 reaction vessels.

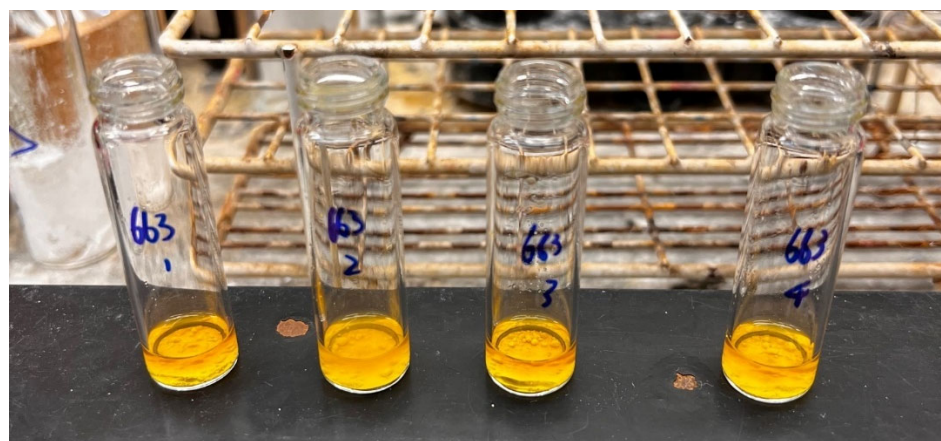

5. Add one stir bar to each of the reaction vessel.

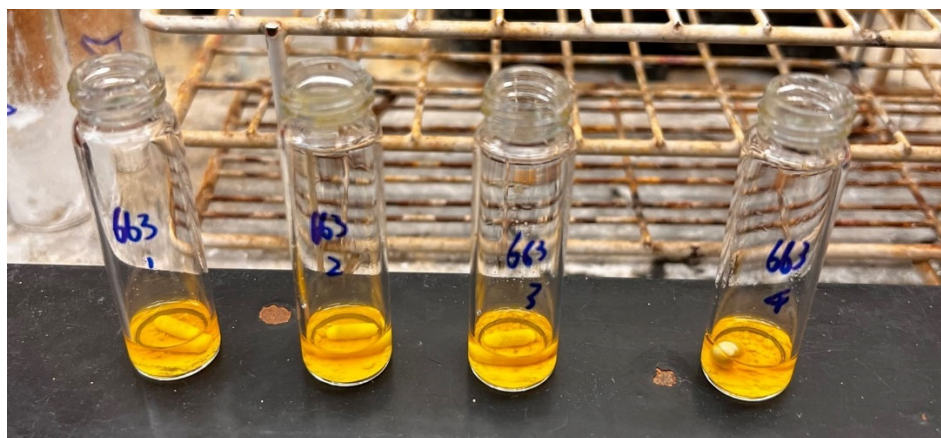

6. Prepare 4 vial caps with PTFE septum (glossy side of the septum should be in contact with the reaction vessel).

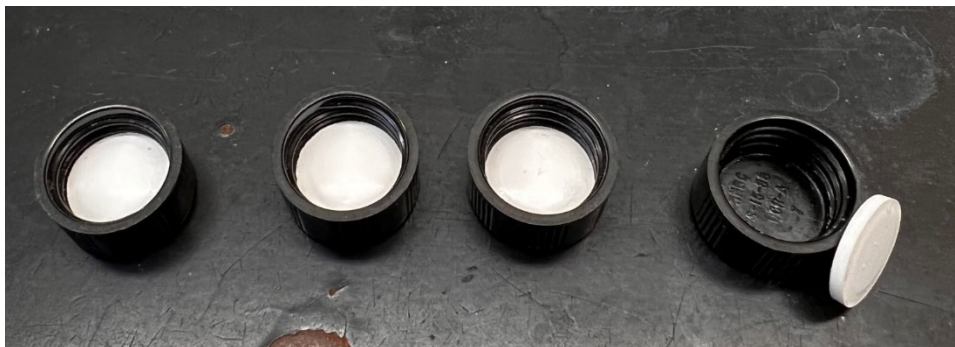

7. Put on the caps. Make sure the caps are tightly screwed to the vial and the reaction vessels should therefore be sealed. Tightening too much is not recommended as it would deform the PTFE septum and lead to solvent leakage.

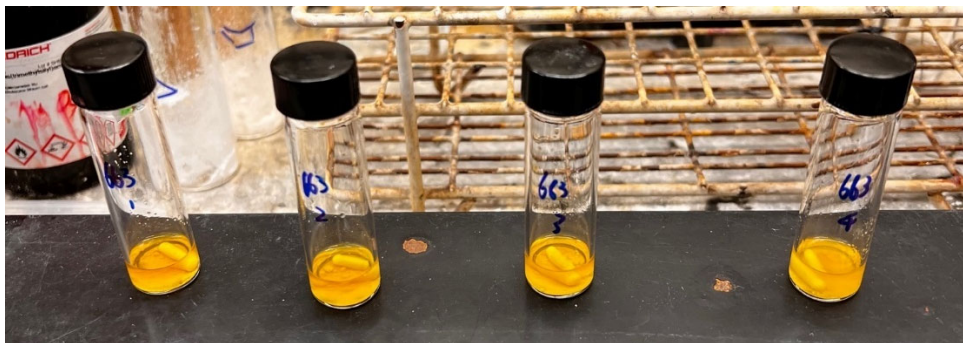

8. Sonicate the reaction mixture, whereby the reaction mixtures will then acquire a milky appearance. Make sure the caps are still tightly screwed to the vial afterwards.

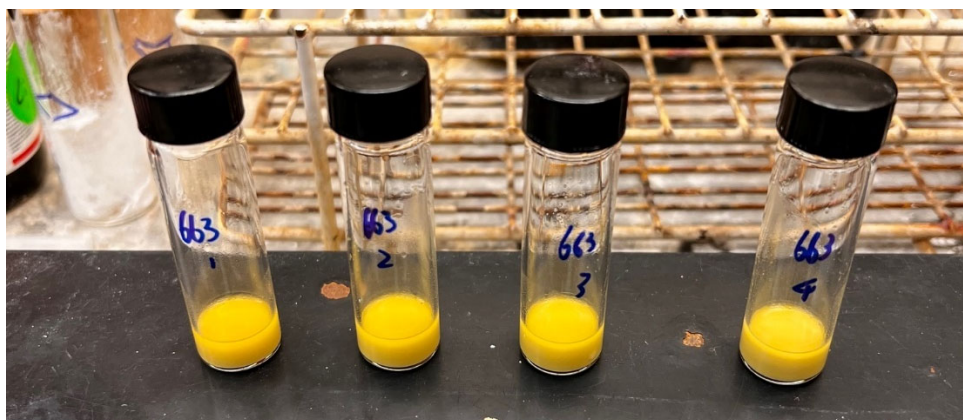

9. Load the reaction vessels onto the heating block, block temperature 100 °C, stirring rate 200 rpm, for 36 hours (Do not let the reactions run for longer than 36 hours, as yields were found to decrease with extended reaction time, please see optimization data above).

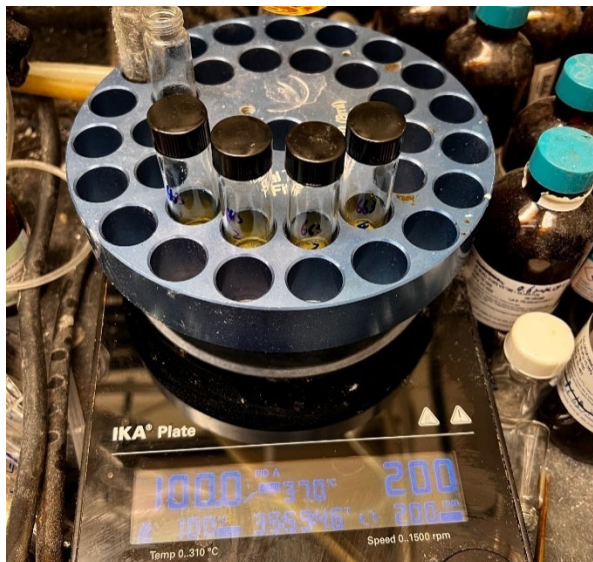

10. Colour of the reaction mixture changes from bright yellow before heating, to brown/crimson with ligand L2 after ~15 minutes of heating at 100 °C (block temperature). With ligand L1, the colour changes from bright yellow to olive green (~5 minutes), and then to brown/crimson (~15-30 minutes) (not shown here). **Note:** colour changes of the reaction mixture occur faster with vials.

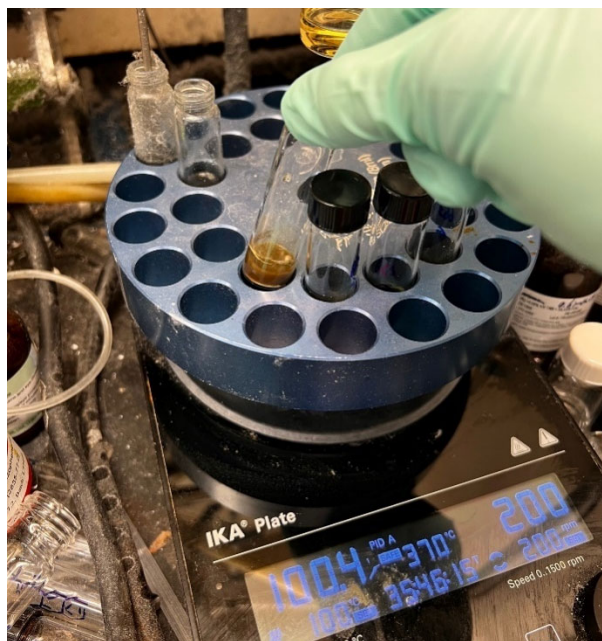

**11.** After 36 hours, cool the reaction mixture to room temperature, dilute with dichloromethane (1.0 mL), followed by addition of deionized water (2.0 mL), aq. 6M aq. HCl (0.3 mL), brine (1.0 mL) and then shaken vigorously. The lower organic layer was carefully pipetted and filtered through a short plug of Celite®.

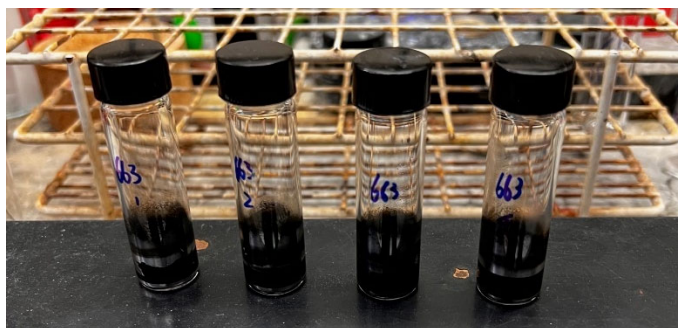

State of reaction mixture after 36 hours.

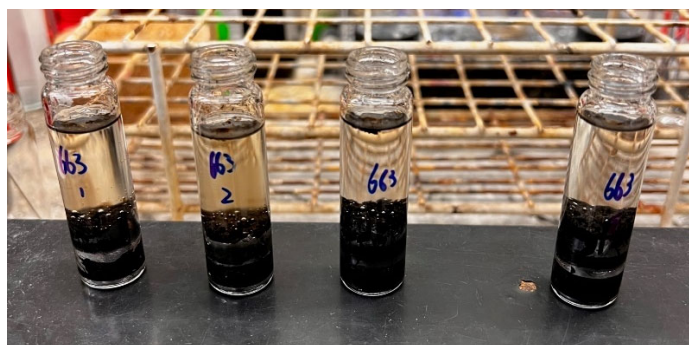

State of reaction mixture after aqueous workup.

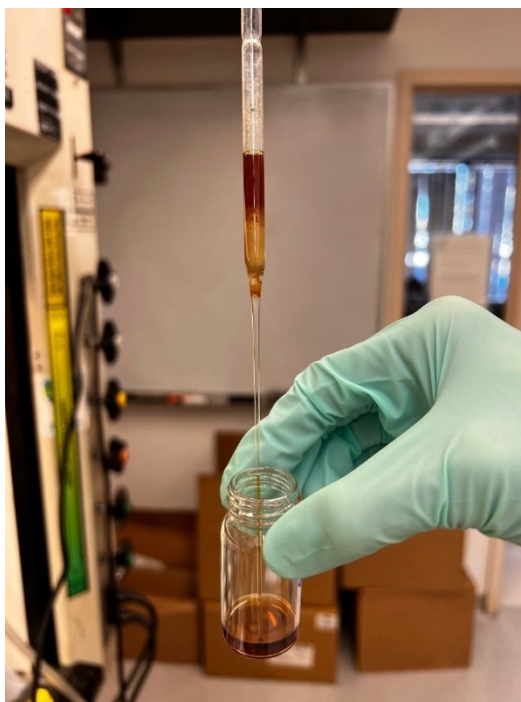

Filtration set-up.

**12.** The combined organic layer was then evaporated to dryness. The crude was then taken into CDCl<sub>3</sub> (0.6 mL) with CH<sub>2</sub>Br<sub>2</sub> (10.0 μL) as the internal standard to determine the assay yield of the reaction by <sup>1</sup>H NMR spectroscopy.

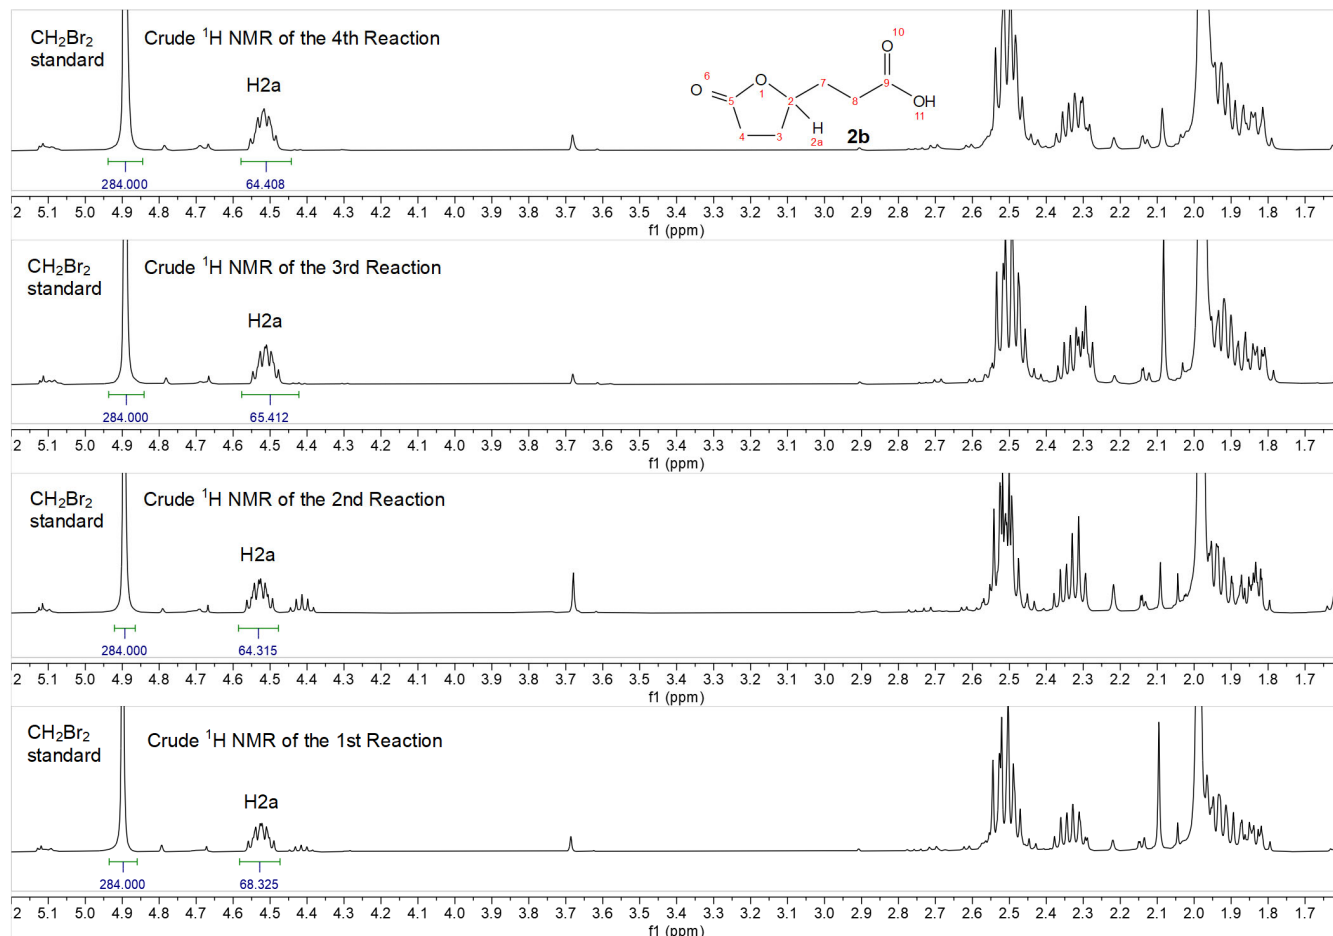

### Determination of assay yield by <sup>1</sup>H NMR spectroscopy of the crude reaction mixture:

For 10.0 μL of CH<sub>2</sub>Br<sub>2</sub>, the no. of mmol of CH<sub>2</sub>Br<sub>2</sub> is  $[(10.0 \times 2.477) / 173.83] = 0.142$  mmol.

Since each mole of CH<sub>2</sub>Br<sub>2</sub> contains 2 moles of H, the no. of mmol of H is 0.284 mmol.

Setting the integral of the resonance of the CH<sub>2</sub>Br<sub>2</sub> standard to 0.284, the integral of each C–H resonance of any species on the crude <sup>1</sup>H NMR would reflect the no. of mmol of that species.

For the case of the lactone product **2b**, the resonance at ~ 4.5 ppm corresponds to H<sub>2</sub>a as shown on the structure of the product.

Setting the integral of the CH<sub>2</sub>Br<sub>2</sub> standard to 284 would then reflect the percentage NMR yield of the product, because:  $[(\text{Observed integral of the resonance of H}_2\text{a when the integral of the standard is set to 0.284}) / 0.1] \times 100 = \text{Percentage NMR yield of the product.}$

13. The purification of the lactone acids with column chromatography was performed using the following setup:

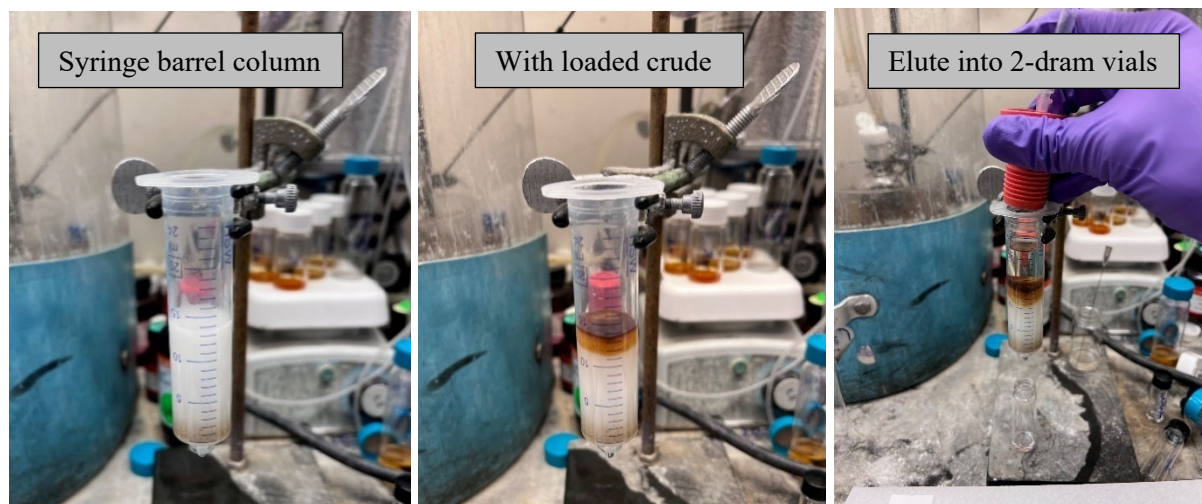

### 2.3 Characterization data of products obtained from $\beta$ -directed, $\gamma$ -C–H lactonization reaction

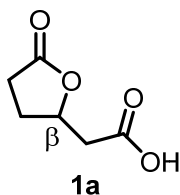

#### 2-(5-Oxotetrahydrofuran-2-yl)acetic acid 1a

Following the general procedure for its synthesis, the compound was purified as the acid by column chromatography (General procedure for gradient elution: begin with 50% EtOAc/hexane + 1% AcOH, and increase the composition of EtOAc by 10% for every 8 mL of eluent used to 100% EtOAc + 1% AcOH). Isolated yield 65% (9.4 mg, 0.065 mmol, colorless oil).

$^1\text{H}$  NMR (400 MHz,  $\text{CDCl}_3$ )  $\delta$  4.90 (dddd,  $J = 9.1, 7.8, 6.9, 6.1$  Hz, 1H), 2.85 (dd,  $J = 16.6, 6.9$  Hz, 1H), 2.72 (dd,  $J = 16.6, 6.1$  Hz, 1H), 2.67 – 2.55 (m, 2H), 2.49 (dt,  $J = 12.8, 7.8$  Hz, 1H), 1.99 (dtd,  $J = 12.8, 9.1, 7.7$  Hz, 1H).

$^{13}\text{C}$  NMR (100 MHz,  $\text{CDCl}_3$ )  $\delta$  176.9, 175.0, 76.1, 39.8, 28.6, 27.6.

HRMS (ESI-TOF) Calculated for  $\text{C}_6\text{H}_6\text{O}_4$   $[\text{M}-\text{H}]^-$ : 143.0350, found 143.0344.

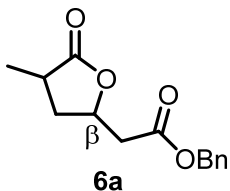

#### Benzyl 2-(4-methyl-5-oxotetrahydrofuran-2-yl)acetate 6a

Following the general procedure for its synthesis and benzyl ester formation, the compound was purified as the benzyl ester by pTLC (20% EA/hexanes,  $R_f = 0.30$ ). Isolated yield 60% over 2 steps (14.9 mg, 0.60 mmol, colourless oil, d.r. = 1.5:1). Diastereomers were not separable by column chromatography,  $^1\text{H}$  and  $^{13}\text{C}$  NMR data reported as a mixture of diastereomers.

NMR for minor isomer:  $^1\text{H}$  NMR (600 MHz,  $\text{CDCl}_3$ )  $\delta$  7.43 – 7.32 (m, 5H), 5.15 (s, 2H), 4.97 – 4.88 (m, 1H), 2.83 (dd,  $J = 16.1, 6.7$  Hz, 1H), 2.74 – 2.59 (m, 2H), 2.26 – 2.07 (m, 2H), 1.29 (d,  $J = 7.3$  Hz, 3H).

$^{13}\text{C}$  NMR (151 MHz,  $\text{CDCl}_3$ )  $\delta$  179.4, 169.5, 135.5, 128.8, 128.6, 128.5, 74.0, 67.0, 40.0, 35.1, 33.8, 15.9.

NMR for major isomer:  $^1\text{H}$  NMR (600 MHz,  $\text{CDCl}_3$ )  $\delta$  7.41 – 7.30 (m, 5H), 5.15 (s, 2H), 4.82 – 4.71 (m, 1H), 2.88 (dd,  $J = 16.3, 6.9$  Hz, 1H), 2.74 – 2.59 (m, 2H), 1.65 – 1.55 (m, 2H), 1.27 (d,  $J = 7.0$  Hz, 3H).



$^{13}\text{C}$  NMR (151 MHz,  $\text{CDCl}_3$ )  $\delta$  178.8, 169.5, 135.5, 128.8, 128.6, 128.5, 74.1, 67.0, 40.2, 37.0, 35.8, 15.1.

HRMS (ESI-TOF) Calculated for  $\text{C}_{14}\text{H}_{17}\text{O}_4$   $[\text{M}+\text{H}]^+$ : 249.1127, found 249.1131.

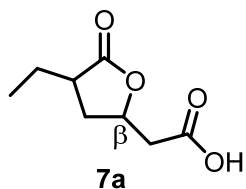

### 2-(4-Ethyl-5-oxotetrahydrofuran-2-yl)acetic acid 7a

Following the general procedure for its synthesis, the compound was purified as the acid by column chromatography (General procedure for gradient elution: begin with 20% EtOAc/hexane + 1% AcOH, and increase the composition of EtOAc by 10% for every 8 mL of eluent used to 100% EtOAc + 1% AcOH). Isolated yield 60% (10.3 mg, 0.060 mmol, colorless oil, d.r. = 1.4:1). Diastereomers were not separable by column chromatography,  $^1\text{H}$  and  $^{13}\text{C}$  NMR data reported as a mixture of diastereomers.

NMR for minor isomer:  $^1\text{H}$  NMR (600 MHz,  $\text{CDCl}_3$ )  $\delta$  4.98 – 4.86 (m, 1H), 2.90 – 2.77 (m, 1H), 2.74 – 2.64 (m, 1H), 2.64 – 2.54 (m, 1H), 2.24 – 2.13 (m, 2H), 1.89 – 1.82 (m, 1H), 1.59 – 1.53 (m, 1H), 1.01 (t,  $J = 7.5$  Hz, 3H).

$^{13}\text{C}$  NMR (151 MHz,  $\text{CDCl}_3$ )  $\delta$  178.9, 175.2, 74.2, 40.6, 39.9, 32.7, 24.0, 11.7.

NMR for major isomer:  $^1\text{H}$  NMR (600 MHz,  $\text{CDCl}_3$ )  $\delta$  4.78 – 4.72 (m, 1H), 2.89 – 2.78 (m, 1H), 2.74 – 2.64 (m, 1H), 2.64 – 2.55 (m, 2H), 1.97 – 1.89 (m, 1H), 1.68 – 1.60 (m, 1H), 1.53 – 1.46 (m, 1H), 0.99 (t,  $J = 7.5$  Hz, 3H).

$^{13}\text{C}$  NMR (151 MHz,  $\text{CDCl}_3$ )  $\delta$  178.3, 175.2, 74.0, 42.2, 40.0, 34.3, 23.3, 11.7.

HRMS (ESI-TOF) Calculated for  $\text{C}_8\text{H}_{11}\text{O}_4$ , for  $[\text{M}-\text{H}]^-$ : 171.0657, found 171.0664.

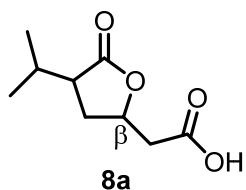

### 2-(4-Isopropyl-5-oxotetrahydrofuran-2-yl)acetic acid 8a

Following the general procedure for its synthesis, the compound was purified as the acid by column chromatography (General procedure for gradient elution: begin with 20% EtOAc/hexane + 1% AcOH, and increase the composition of EtOAc by 10% for every 8 mL of eluent used to 100% EtOAc + 1% AcOH). Isolated yield 55% (10.3 mg, 0.055 mmol, colorless oil, d.r. 1.3:1). Diastereomers were not separable by column chromatography,  $^1\text{H}$  and  $^{13}\text{C}$  NMR data reported as a mixture of diastereomers.

NMR for minor isomer:  $^1\text{H}$  NMR (600 MHz,  $\text{CDCl}_3$ )  $\delta$  4.85 (dt,  $J = 14.0, 6.6$  Hz, 1H), 2.82 (dd,  $J = 16.5, 6.7$  Hz, 1H), 2.75 – 2.65 (m, 1H), 2.65 – 2.57 (m, 1H), 2.34 – 2.25 (m, 1H), 2.23 – 2.14 (m, 1H), 2.05 (ddd,  $J = 14.0, 9.9, 5.4$  Hz, 1H), 1.09 – 0.99 (m, 3H), 0.96 (d,  $J = 6.8$  Hz, 3H).

$^{13}\text{C}$  NMR (151 MHz,  $\text{CDCl}_3$ )  $\delta$  177.4, 175.0, 74.2, 45.3, 40.2, 29.3, 29.0, 20.8, 18.7.

NMR for major isomer:  $^1\text{H}$  NMR (600 MHz,  $\text{CDCl}_3$ )  $\delta$  4.73 (dq,  $J = 10.5, 6.3$  Hz, 1H), 2.87 (dd,  $J = 16.5, 7.0$  Hz, 1H), 2.75 – 2.65 (m, 1H), 2.65 – 2.57 (m, 1H), 2.43 (ddd,  $J = 13.1, 8.8, 5.8$  Hz, 1H), 2.23 – 2.14 (m, 1H), 1.78 – 1.67 (m, 1H), 1.09 – 0.99 (m, 3H), 0.92 (d,  $J = 6.8$  Hz, 3H).

$^{13}\text{C}$  NMR (151 MHz,  $\text{CDCl}_3$ )  $\delta$  178.2, 175.0, 73.7, 46.9, 39.9, 30.3, 27.6, 20.6, 18.4.

HRMS (ESI-TOF) Calculated for  $\text{C}_9\text{H}_{15}\text{O}_4$   $[\text{M}+\text{H}]^+$ : 187.0970, Found: 187.0972.

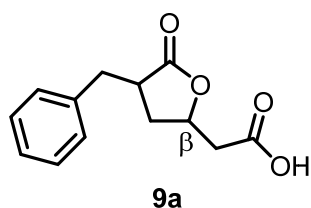

### 2-(4-Benzyl-5-oxotetrahydrofuran-2-yl)acetic acid **9a**

Following the general procedure for its synthesis, the compound was purified as the acid by column chromatography (General procedure for gradient elution: begin with 20% EtOAc/hexane + 1% AcOH, and increase the composition of EtOAc by 10% for every 8 mL of eluent used to 100% EtOAc + 1% AcOH). Isolated yield 60% (14.0 mg, 0.060 mmol, colorless oil, d.r = 1.4:1). Diastereomers were not separable by column chromatography,  $^1\text{H}$  and  $^{13}\text{C}$  NMR data reported as a mixture of diastereomers.

NMR for minor isomer:  $^1\text{H}$  NMR (600 MHz,  $\text{CDCl}_3$ )  $\delta$  7.35 – 7.15 (m, 5H), 4.79 – 4.65 (m, 1H), 3.18 (dd,  $J = 13.9, 4.5$  Hz, 1H), 3.03 – 2.92 (m, 1H), 2.83 – 2.71 (m, 2H), 2.65 – 2.54 (m, 1H), 2.22 (dt,  $J = 13.1, 7.6$  Hz, 1H), 2.03 (ddd,  $J = 13.8, 9.3, 5.1$  Hz, 1H).

$^{13}\text{C}$  NMR (151 MHz,  $\text{CDCl}_3$ )  $\delta$  178.3, 175.3, 138.0, 129.0, 128.9, 127.1, 74.2, 40.9, 39.9, 36.5, 32.2.

NMR for major isomer:  $^1\text{H}$  NMR (600 MHz,  $\text{CDCl}_3$ )  $\delta$  7.35 – 7.15 (m, 5H), 4.79 – 4.65 (m, 1H), 3.27 (dd,  $J = 14.1, 4.3$  Hz, 1H), 3.03 – 2.92 (m, 1H), 2.83 – 2.71 (m, 2H), 2.64 – 2.54 (m, 1H), 2.49 – 2.40 (m, 1H), 1.71 – 1.61 (m, 1H).

$^{13}\text{C}$  NMR (151 MHz,  $\text{CDCl}_3$ )  $\delta$  178.3, 175.3, 138.3, 129.0, 128.9, 126.9, 74.2, 42.6, 39.8, 36.1, 34.3.

HRMS (ESI-TOF) Calculated for  $\text{C}_{13}\text{H}_{15}\text{O}_4$   $[\text{M}+\text{H}]^+$ : 235.0970, found 235.0967.

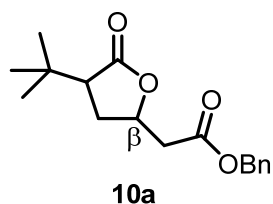

### Benzyl 2-(4-(*tert*-butyl)-5-oxotetrahydrofuran-2-yl)acetate 10a

Following the general procedure for its synthesis and benzyl ester formation, the compound was purified as the benzyl ester by pTLC (20% EA/hexanes,  $R_f = 0.30$ ). Isolated yield 50% over 2 steps (14.5 mg, 0.050 mmol, colourless oil, d.r. = 1.5:1). Diastereomers were not separable by column chromatography,  $^1\text{H}$  and  $^{13}\text{C}$  NMR data reported as a mixture of diastereomers.

NMR for minor isomer:  $^1\text{H}$  NMR (600 MHz,  $\text{CDCl}_3$ )  $\delta$  7.43 – 7.28 (m, 5H), 5.30 – 5.07 (m, 2H), 4.83 (dtd,  $J = 8.1, 6.5, 5.0$  Hz, 1H), 2.81 (dd,  $J = 16.1, 6.4$  Hz, 1H), 2.64 – 2.58 (m, 1H), 2.45 (dd,  $J = 9.9, 7.6$  Hz, 1H), 2.34 (dt,  $J = 13.5, 7.9$  Hz, 1H), 2.03 (ddd,  $J = 13.5, 9.9, 5.0$  Hz, 1H), 1.05 (s, 9H).

$^{13}\text{C}$  NMR (151 MHz,  $\text{CDCl}_3$ )  $\delta$  177.0, 169.6, 135.5, 128.8, 128.6, 128.5, 73.6, 67.0, 48.9, 40.5, 31.7, 30.2, 27.5.

NMR for major isomer:  $^1\text{H}$  NMR (600 MHz,  $\text{CDCl}_3$ )  $\delta$  7.43 – 7.28 (m, 5H), 5.30 – 5.07 (m, 2H), 4.67 (dtd,  $J = 10.4, 6.5, 5.6$  Hz, 1H), 2.88 (dd,  $J = 16.3, 6.7$  Hz, 1H), 2.70 – 2.64 (m, 1H), 2.50 (dd,  $J = 12.6, 8.6$  Hz, 1H), 2.43 – 2.38 (m, 1H), 1.75 (td,  $J = 12.6, 10.5$  Hz, 1H), 1.05 (s, 9H).

$^{13}\text{C}$  NMR (151 MHz,  $\text{CDCl}_3$ )  $\delta$  176.1, 169.6, 135.5, 128.8, 128.7, 128.5, 73.0, 67.0, 50.7, 40.2, 33.0, 31.7, 27.3.

HRMS (ESI-TOF) Calculated for  $\text{C}_{17}\text{H}_{23}\text{O}_4$   $[\text{M}+\text{H}]^+$ : 291.1596, Found: 291.1600.

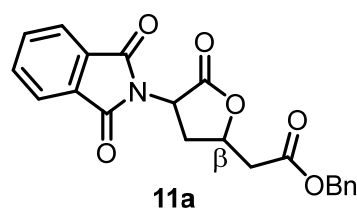

### Benzyl 2-(4-(1,3-dioxoisindolin-2-yl)-5-oxotetrahydrofuran-2-yl)acetate 11a

Following the general procedure for its synthesis and benzyl ester formation, the compound was purified as the benzyl ester by pTLC (30% EA/hexanes,  $R_f = 0.30$ ). Isolated yield 25% over 2 steps (9.5 mg, 0.025 mmol, colourless oil, d.r. = 2:1). Diastereomers were not separable by column chromatography,  $^1\text{H}$  and  $^{13}\text{C}$  NMR data reported as a mixture of diastereomers.

NMR for minor diastereomer:  $^1\text{H}$  NMR (400 MHz,  $\text{CDCl}_3$ )  $\delta$  8.01 – 7.82 (m, 2H), 7.82 – 7.72 (m, 2H), 7.46 – 7.31 (m, 5H), 5.36 – 5.11 (m, 4H), 2.96 – 2.85 (m, 2H), 2.85 – 2.73 (m, 1H), 2.61 – 2.44 (m, 1H).

$^{13}\text{C}$  NMR (100 MHz,  $\text{CDCl}_3$ )  $\delta$  172.2, 169.2, 167.0, 135.4, 134.7, 131.8, 128.9, 128.7, 128.6, 124.0, 74.1, 67.2, 46.7, 39.6, 31.3.

NMR for major diastereomer:  $^1\text{H}$  NMR (400 MHz,  $\text{CDCl}_3$ )  $\delta$  8.01 – 7.82 (m, 2H), 7.82 – 7.72 (m, 2H), 7.46 – 7.31 (m, 5H), 5.36 – 5.11 (m, 3H), 4.99 (tdd,  $J = 8.3, 6.9, 3.6$  Hz, 1H), 3.12 (ddd,  $J = 16.5, 6.8, 1.7$  Hz, 1H), 2.96 – 2.85 (m, 1H), 2.85 – 2.73 (m, 1H), 2.61 – 2.44 (m, 1H).

$^{13}\text{C}$  NMR (100 MHz,  $\text{CDCl}_3$ )  $\delta$  171.2, 169.2, 167.0, 135.4, 134.7, 131.7, 128.8, 128.7, 128.6, 124.0, 73.7, 67.1, 48.2, 40.3, 32.4.

HRMS (ESI-TOF) Calculated for  $\text{C}_{21}\text{H}_{18}\text{NO}_6$   $[\text{M}+\text{H}]^+$ : 380.1134, Found: 380.1133.

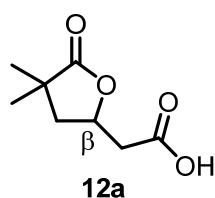

### 2-(4,4-Dimethyl-5-oxotetrahydrofuran-2-yl)acetic acid **12a**

Following the general procedure for its synthesis, the compound was purified as the acid by column chromatography (General procedure for gradient elution: begin with 20% EtOAc/hexane + 1% AcOH, and increase the composition of EtOAc by 10% for every 8 mL of eluent used to 100% EtOAc + 1% AcOH). Isolated yield 84% (14.4 mg, 0.084 mmol, off white solid).

$^1\text{H}$  NMR (500 MHz,  $\text{CDCl}_3$ )  $\delta$  4.83 (ddt,  $J = 10.0, 7.1, 6.0$  Hz, 1H), 2.86 (dd,  $J = 16.6, 7.1$  Hz, 1H), 2.68 (dd,  $J = 16.6, 6.0$  Hz, 1H), 2.32 (dd,  $J = 12.8, 6.0$  Hz, 1H), 1.85 (dd,  $J = 12.8, 9.9$  Hz, 1H), 1.29 (s, 3H), 1.29 (s, 3H).

$^{13}\text{C}$  NMR (126 MHz,  $\text{CDCl}_3$ )  $\delta$  181.4, 175.0, 72.5, 43.1, 40.5, 40.0, 25.1, 24.5.

HRMS (ESI-TOF) Calculated for  $\text{C}_8\text{H}_{13}\text{O}_4$   $[\text{M}+\text{H}]^+$ : 173.0814, Found: 173.0809.

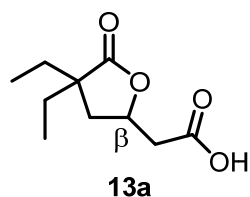

### 2-(4,4-Diethyl-5-oxotetrahydrofuran-2-yl)acetic acid **13a**

Following the general procedure for its synthesis, the compound was purified as the acid by column chromatography (General procedure for gradient elution: begin with 20% EtOAc/hexane + 1% AcOH, and increase the composition of EtOAc by 10% for every 8 mL of eluent used to 100% EtOAc + 1% AcOH). Isolated yield 66% (13.2 mg, 0.066 mmol, off white solid).

$^1\text{H}$  NMR (500 MHz,  $\text{CDCl}_3$ )  $\delta$  4.79 (dddd,  $J = 9.4, 7.0, 6.9, 6.1$  Hz, 1H), 2.84 (dd,  $J = 16.5, 7.0$  Hz, 1H), 2.66 (dd,  $J = 16.5, 6.1$  Hz, 1H), 2.27 (dd,  $J = 13.2, 6.9$  Hz, 1H), 1.88 (dd,  $J = 13.2, 9.4$  Hz, 1H), 1.75 – 1.51 (m, 4H), 0.96 (t,  $J = 7.5$  Hz, 3H), 0.90 (t,  $J = 7.5$  Hz, 3H).

$^{13}\text{C}$  NMR (126 MHz,  $\text{CDCl}_3$ )  $\delta$  180.4, 175.3, 72.7, 48.8, 40.6, 37.5, 29.3, 28.4, 8.9, 8.8.

HRMS (ESI-TOF) Calculated for  $\text{C}_{10}\text{H}_{17}\text{O}_4$   $[\text{M}+\text{H}]^+$ : 201.1127, Found: 201.1135.

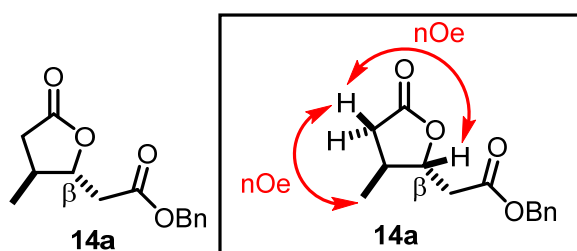

### Benzyl 2-((2*R*\*,3*S*\*)-3-methyl-5-oxotetrahydrofuran-2-yl)acetate 14a

Following the general procedure for its synthesis and benzyl ester formation, the compound was purified as the benzyl ester by pTLC (10% EA/hexanes,  $R_f = 0.30$ ). Isolated yield 70% over 2 steps (17.4 mg, 0.070 mmol, colourless oil, d.r. > 20:1).

$^1\text{H}$  NMR (500 MHz,  $\text{CDCl}_3$ )  $\delta$  7.49 – 7.29 (m, 5H), 5.16 (s, 2H), 4.49 (td,  $J = 7.0, 5.7$  Hz, 1H), 2.77 – 2.65 (m, 3H), 2.33 (ddd,  $J = 15.3, 8.5, 7.0$  Hz, 1H), 2.22 (dd,  $J = 17.3, 9.1$  Hz, 1H), 1.15 (d,  $J = 6.6$  Hz, 3H).

$^{13}\text{C}$  NMR (126 MHz,  $\text{CDCl}_3$ )  $\delta$  175.7, 169.7, 135.5, 128.8, 128.6, 128.6, 82.6, 67.1, 39.0, 36.7, 35.9, 17.5.

HRMS (ESI-TOF) Calculated for  $\text{C}_{14}\text{H}_{17}\text{O}_4$   $[\text{M}+\text{H}]^+$ : 249.1127, Found: 249.1131.

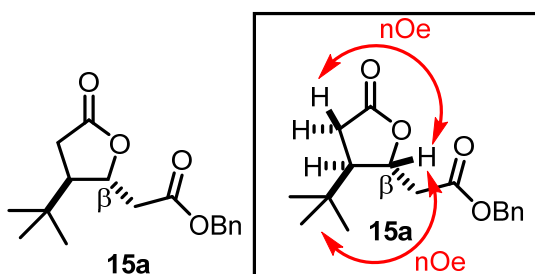

### Benzyl 2-((2*R*\*,3*R*\*)-3-(*tert*-butyl)-5-oxotetrahydrofuran-2-yl)acetate 15a

Following the general procedure for its synthesis and benzyl ester formation, the compound was purified as the benzyl ester by pTLC (10% EA/hexanes,  $R_f = 0.50$ ). Isolated yield 76% over 2 steps (22.0 mg, 0.076 mmol, colourless oil, d.r. > 20:1).

$^1\text{H}$  NMR (400 MHz,  $\text{CDCl}_3$ )  $\delta$  7.68 – 7.30 (m, 5H), 5.43 – 5.01 (m, 2H), 4.79 (ddd,  $J = 6.6, 5.5, 4.4$  Hz, 1H), 2.78 – 2.68 (m, 2H), 2.63 (dd,  $J = 18.4, 10.0$  Hz, 1H), 2.40 (dd,  $J = 18.4, 5.4$  Hz, 1H), 2.09 (ddd,  $J = 10.0, 5.5, 5.4$  Hz, 1H), 0.90 (s, 9H).

$^{13}\text{C}$  NMR (100 MHz,  $\text{CDCl}_3$ )  $\delta$  176.6, 169.5, 135.4, 128.8, 128.6, 128.6, 77.8, 67.0, 49.5, 41.3, 32.5, 30.4, 26.8.

HRMS (ESI-TOF) Calculated for  $\text{C}_{17}\text{H}_{23}\text{O}_4$   $[\text{M}+\text{H}]^+$ : 291.1596, Found: 291.1602.

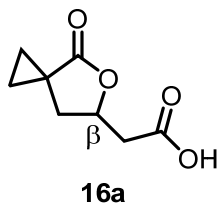

### 2-(4-Oxo-5-oxaspiro[2.4]heptan-6-yl)acetic acid **16a**

Following the general procedure for its synthesis, the compound was purified as the acid by column chromatography (General procedure for gradient elution: begin with 20% EtOAc/hexane + 1% AcOH, and increase the composition of EtOAc by 10% for every 8 mL of eluent used to 100% EtOAc + 1% AcOH). Isolated yield 62% (10.5 mg, 0.062 mmol, off white solid).

$^1\text{H}$  NMR (500 MHz,  $\text{CDCl}_3$ )  $\delta$  5.00 (dddd,  $J = 7.6, 7.0, 6.8, 6.5$  Hz, 1H), 2.93 (dd,  $J = 16.5, 6.8$  Hz, 1H), 2.76 (dd,  $J = 16.5, 6.5$  Hz, 1H), 2.48 (dd,  $J = 12.9, 7.6$  Hz, 1H), 2.14 (dd,  $J = 12.9, 7.0$  Hz, 1H), 1.35 (ddd,  $J = 10.5, 6.5, 3.6$  Hz, 1H), 1.26 (ddd,  $J = 10.5, 6.6, 3.7$  Hz, 1H), 1.08 – 0.89 (m, 2H).

$^{13}\text{C}$  NMR (126 MHz,  $\text{CDCl}_3$ )  $\delta$  179.4, 175.0, 73.4, 40.3, 35.4, 20.3, 16.0, 14.9.

HRMS (ESI-TOF) Calculated for  $\text{C}_8\text{H}_{11}\text{O}_4$   $[\text{M}+\text{H}]^+$ : 171.0657, Found: 171.0661.

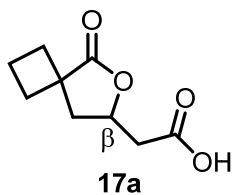

### 2-(5-Oxo-6-oxaspiro[3.4]octan-7-yl)acetic acid **17a**

Following the general procedure for its synthesis, the compound was purified as the acid by column chromatography (General procedure for gradient elution: begin with 20% EtOAc/hexane + 1% AcOH, and increase the composition of EtOAc by 10% for every 8 mL of eluent used to 100% EtOAc + 1% AcOH). Isolated yield 65% (12.0 mg, 0.065 mmol, off white solid).

$^1\text{H}$  NMR (500 MHz,  $\text{CDCl}_3$ )  $\delta$  4.74 (dq,  $J = 8.3, 6.4$  Hz, 1H), 2.82 (dd,  $J = 16.5, 7.1$  Hz, 1H), 2.68 – 2.64 (m, 2H), 2.64 – 2.60 (m, 1H), 2.60 – 2.53 (m, 1H), 2.46 (dtd,  $J = 11.5, 7.3, 2.6$  Hz, 1H), 2.15 (dq,  $J = 11.4, 4.5$  Hz, 1H), 2.13 – 2.08 (m, 1H), 2.08 – 2.04 (m, 1H), 2.04 – 2.02 (m, 1H), 2.02 – 1.98 (m, 2H).

$^{13}\text{C}$  NMR (126 MHz,  $\text{CDCl}_3$ )  $\delta$  180.5, 175.1, 72.9, 44.3, 41.6, 39.9, 31.8, 29.6, 16.6.

HRMS (ESI-TOF) Calculated for  $\text{C}_9\text{H}_{13}\text{O}_4$   $[\text{M}+\text{H}]^+$ : 185.0814, Found: 185.0816.

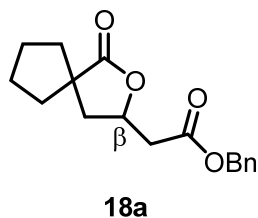

### Benzyl 2-(1-Oxo-2-oxaspiro[4.4]nonan-3-yl)acetate 18a

Following the general procedure for its synthesis and benzyl ester formation, the compound was purified as the benzyl ester by pTLC (20% EA/hexanes,  $R_f = 0.30$ ). Isolated yield 55% over 2 steps (15.9 mg, 0.055 mmol, colourless oil).

$^1\text{H}$  NMR (600 MHz,  $\text{CDCl}_3$ )  $\delta$  7.50 – 7.28 (m, 5H), 5.15 (s, 2H), 4.80 (dddd,  $J = 9.4, 6.9, 6.3, 6.0$  Hz, 1H), 2.89 (dd,  $J = 16.2, 6.9$  Hz, 1H), 2.65 (dd,  $J = 16.2, 6.3$  Hz, 1H), 2.33 (dd,  $J = 12.7, 6.0$  Hz, 1H), 2.17 (dtd,  $J = 12.9, 6.9, 1.8$  Hz, 1H), 1.96 – 1.87 (m, 1H), 1.87 – 1.84 (m, 2H), 1.84 – 1.80 (m, 1H), 1.79 – 1.71 (m, 1H), 1.71 – 1.62 (m, 2H), 1.62 – 1.54 (m, 1H).

$^{13}\text{C}$  NMR (151 MHz,  $\text{CDCl}_3$ )  $\delta$  181.9, 169.7, 135.5, 128.8, 128.6, 128.5, 73.4, 67.0, 50.1, 42.9, 40.3, 37.6, 36.9, 25.6, 25.5.

HRMS (ESI-TOF) Calculated for  $\text{C}_{17}\text{H}_{21}\text{O}_4$   $[\text{M}+\text{H}]^+$ : 289.1440, Found: 289.1446.

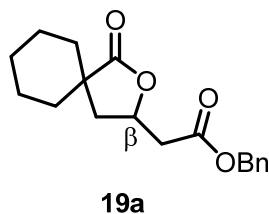

### Benzyl 2-(1-oxo-2-oxaspiro[4.5]decan-3-yl)acetate 19a

Following the general procedure for its synthesis and benzyl ester formation, the compound was purified as the benzyl ester by pTLC (20% EA/hexanes,  $R_f = 0.35$ ). Isolated yield 65% over 2 steps (20.0 mg, 0.065 mmol, colourless oil).

$^1\text{H}$  NMR (600 MHz,  $\text{CDCl}_3$ )  $\delta$  7.49 – 7.29 (m, 5H), 5.16 (s, 2H), 4.82 (dddd,  $J = 10.3, 6.8, 6.4, 6.3$  Hz, 1H), 2.88 (dd,  $J = 16.2, 6.8$  Hz, 1H), 2.66 (dd,  $J = 16.2, 6.4$  Hz, 1H), 2.48 (dd,  $J = 13.0, 6.3$  Hz, 1H), 1.88 – 1.80 (m, 1H), 1.80 – 1.75 (m, 1H), 1.73 (dd,  $J = 9.7, 4.1$  Hz, 1H), 1.71 – 1.66 (m, 1H), 1.66 – 1.62 (m, 1H), 1.62 – 1.58 (m, 2H), 1.48 (dt,  $J = 13.9, 4.5$  Hz, 1H), 1.42 – 1.36 (m, 1H), 1.36 – 1.30 (m, 1H), 1.28 – 1.18 (m, 1H).

$^{13}\text{C}$  NMR (151 MHz,  $\text{CDCl}_3$ )  $\delta$  181.0, 169.7, 135.5, 128.8, 128.6, 128.6, 73.1, 67.0, 45.0, 40.6, 39.3, 34.4, 31.7, 25.4, 22.3, 22.2.

HRMS (ESI-TOF) Calculated for  $\text{C}_{18}\text{H}_{23}\text{O}_4$   $[\text{M}+\text{H}]^+$ : 303.1596, Found: 303.1599.

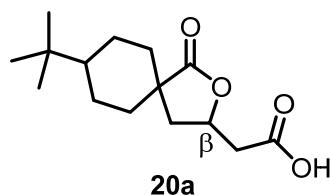

### 2-(8-(*tert*-Butyl)-1-oxo-2-oxaspiro[4.5]decan-3-yl)acetic acid **20a**

Following the general procedure for its synthesis, the compound was purified as the acid by column chromatography (General procedure for gradient elution: begin with 20% EtOAc/hexane + 1% AcOH, and increase the composition of EtOAc by 10% for every 8 mL of eluent used to 100% EtOAc + 1% AcOH). Isolated yield 67% (18.0 mg, 0.067 mmol, off white solid, d.r. = 2.5:1). Diastereomers were not separable by column chromatography,  $^1\text{H}$  and  $^{13}\text{C}$  NMR data reported as a mixture of diastereomers.

$^1\text{H}$  NMR (500 MHz,  $\text{CDCl}_3$ )  $\delta$  4.91 – 4.68 (m, 1H), 2.95 – 2.77 (m, 1H), 2.75 – 2.61 (m, 1H), 2.52 (dd,  $J = 13.0, 6.5$  Hz, 0.4H), 2.20 – 2.13 (m, 1H), 1.98 – 1.92 (m, 1H), 1.92 – 1.87 (m, 1H), 1.87 – 1.81 (m, 1H), 1.81 – 1.73 (m, 1H), 1.72 – 1.65 (m, 0.5H), 1.65 – 1.57 (m, 2H), 1.57 – 1.50 (m, 0.4H), 1.46 – 1.33 (m, 2H), 1.15 – 1.04 (m, 1H), 0.99 – 0.92 (m, 1H), 0.89 – 0.83 (m, 9H).

$^{13}\text{C}$  NMR (126 MHz,  $\text{CDCl}_3$ )  $\delta$  181.5, 179.1, 175.4, 175.3, 72.9, 72.1, 47.7, 47.2, 45.2, 44.6, 42.4, 40.4, 40.3, 38.4, 35.0, 34.9, 34.9, 32.6, 32.6, 32.0, 27.7, 27.5, 23.4, 23.3, 22.7, 22.7.

HRMS (ESI-TOF) Calculated for  $\text{C}_{15}\text{H}_{25}\text{O}_4$   $[\text{M}+\text{H}]^+$ : 269.1753, Found: 269.1758.



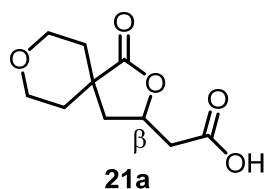

### 2-(1-Oxo-2,8-dioxaspiro[4.5]decan-3-yl)acetic acid **21a**

Following the general procedure for its synthesis, the compound was purified as the acid by column chromatography (General procedure for gradient elution: begin with 20% EtOAc/hexane + 1% AcOH, and increase the composition of EtOAc by 10% for every 8 mL of eluent used to 100% EtOAc + 1% AcOH). Isolated yield 68% (14.5 mg, 0.068 mmol, off white solid).

$^1\text{H}$  NMR (500 MHz,  $\text{CDCl}_3$ )  $\delta$  4.85 (dddd,  $J = 9.7, 6.8, 6.2, 6.0$  Hz, 1H), 4.07 (dt,  $J = 11.7, 4.7$  Hz, 1H), 3.93 (ddd,  $J = 12.0, 5.4, 4.0$  Hz, 1H), 3.63 (ddd,  $J = 12.0, 9.2, 3.0$  Hz, 1H), 3.52 (td,  $J = 11.7, 3.1$  Hz, 1H), 2.88 (dd,  $J = 16.7, 6.8$  Hz, 1H), 2.71 (dd,  $J = 16.6, 6.0$  Hz, 1H), 2.58 (dd,  $J = 13.0, 6.2$  Hz, 1H), 2.26 – 2.02 (m, 1H), 1.94 (ddd,  $J = 13.4, 9.2, 4.0$  Hz, 1H), 1.85 (dd,  $J = 13.0, 9.7$  Hz, 1H), 1.69 – 1.56 (m, 1H), 1.56 – 1.47 (m, 1H).

$^{13}\text{C}$  NMR (126 MHz,  $\text{CDCl}_3$ )  $\delta$  179.3, 174.5, 72.7, 64.1, 63.8, 42.2, 40.0, 39.9, 33.8, 32.1.

HRMS (ESI-TOF) Calculated for  $\text{C}_{10}\text{H}_{13}\text{O}_5$   $[\text{M}-\text{H}]^-$ : 213.0763, Found: 213.0767.

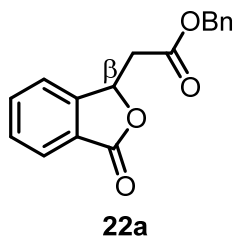

### Benzyl 2-(3-oxo-1,3-dihydroisobenzofuran-1-yl)acetate **22a**

Following the general procedure for its synthesis and benzyl ester formation, the compound was purified as the benzyl ester by pTLC (20% EA/hexanes,  $R_f = 0.40$ ). Isolated yield 65% over 2 steps (18.3 mg, 0.065 mmol, colourless oil).

$^1\text{H}$  NMR (400 MHz,  $\text{CDCl}_3$ )  $\delta$  7.90 (dt,  $J = 7.6, 1.0$  Hz, 1H), 7.64 (td,  $J = 7.6, 1.0$  Hz, 1H), 7.54 (tt,  $J = 7.6, 0.8$  Hz, 1H), 7.42 (dt,  $J = 7.6, 0.8$  Hz, 1H), 7.40 – 7.31 (m, 5H), 5.90 (dd,  $J = 7.1, 6.2$  Hz, 1H), 5.31 – 5.12 (m, 2H), 3.00 (dd,  $J = 16.5, 7.1$  Hz, 1H), 2.91 (dd,  $J = 16.5, 6.2$  Hz, 1H).

$^{13}\text{C}$  NMR (100 MHz,  $\text{CDCl}_3$ )  $\delta$  170.0, 169.2, 148.8, 135.3, 134.4, 129.7, 128.8, 128.7, 128.7, 126.0, 126.0, 122.2, 77.0, 67.2, 39.7.

HRMS (ESI-TOF) Calculated for  $\text{C}_{17}\text{H}_{15}\text{O}_4$   $[\text{M}+\text{H}]^+$ : 283.0970, Found: 283.0973.

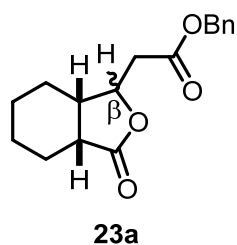

### Benzyl 2-((3aR\*,7aS\*)-3-oxooctahydroisobenzofuran-1-yl)acetate **23a**

Following the general procedure for its synthesis and benzyl ester formation, the compound was purified as the benzyl ester by pTLC (10% EA/hexanes,  $R_f = 0.30$ ). Isolated yield 63% over 2 steps (18.2 mg, 0.063 mmol, colourless oil, d.r. = 2:1). Diastereomers were not separable by column chromatography,  $^1\text{H}$  and  $^{13}\text{C}$  NMR data reported as a mixture of diastereomers.

$^1\text{H}$  NMR (400 MHz,  $\text{CDCl}_3$ )  $\delta$  7.43 – 7.30 (m, 8H), 4.75 (td,  $J = 7.1, 4.2$  Hz, 0.5H), 4.59 (td,  $J = 7.0, 3.0$  Hz, 1H), 2.86 (dd,  $J = 16.6, 7.6$  Hz, 0.5H), 2.82 – 2.69 (m, 1.5H), 2.74 – 2.58 (m, 2.5H), 2.48 (dq,  $J = 11.6, 5.7$  Hz, 0.5H), 2.31 – 2.20 (m, 1H), 1.99 (dt,  $J = 14.2, 4.6$  Hz, 1H), 1.89 – 1.77 (m, 1H), 1.77 – 1.46 (m, 5.5H), 1.38 – 1.19 (m, 3H), 1.16 – 1.05 (m, 1H).

$^{13}\text{C}$  NMR (100 MHz,  $\text{CDCl}_3$ )  $\delta$  177.8, 177.8, 170.0, 169.8, 135.5, 135.5, 128.8, 128.7, 128.7, 128.7, 128.6, 128.5, 79.0, 76.8, 67.0, 67.0, 41.7, 39.3, 38.6, 38.1, 38.1, 34.5, 27.2, 23.5, 23.1, 23.0, 23.0, 22.9, 22.8, 22.6.

HRMS (ESI-TOF) Calculated for  $\text{C}_{17}\text{H}_{21}\text{O}_4$   $[\text{M}+\text{H}]^+$ : 289.1440, Found: 289.1446.

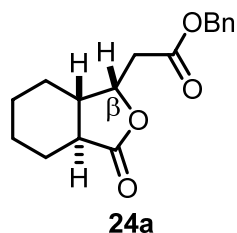

### Benzyl 2-((1S\*,3aS\*,7aS\*)-3-oxooctahydroisobenzofuran-1-yl)acetate **24a**

Following the general procedure for its synthesis and benzyl ester formation, the compound was purified as the benzyl ester by pTLC (10% EA/hexanes,  $R_f = 0.30$ ). Isolated yield 60% over 2 steps (17.3 mg, 0.060 mmol, colourless oil, d.r. = 5:1). Diastereomers were not separable by column chromatography,  $^1\text{H}$  and  $^{13}\text{C}$  NMR data reported as a mixture of diastereomers.

$^1\text{H}$  NMR (500 MHz,  $\text{CDCl}_3$ )  $\delta$  7.48 – 7.29 (m, 5H), 5.34 – 5.05 (m, 2H), 4.51 (ddd,  $J = 10.2, 7.5, 4.9$  Hz, 1H), 2.76 (dd,  $J = 16.1, 7.5$  Hz, 1H), 2.71 (dd,  $J = 16.1, 4.9$  Hz, 1H), 2.26 – 2.09 (m, 1H), 2.02 (ddd,  $J = 13.3, 11.2, 3.3$  Hz, 1H), 1.93 – 1.78 (m, 3H), 1.63 (dtd,  $J = 13.3, 10.2, 2.7$  Hz, 1H), 1.31 – 1.16 (m, 4H).

$^{13}\text{C}$  NMR (126 MHz,  $\text{CDCl}_3$ )  $\delta$  176.3, 169.8, 135.5, 128.8, 128.6, 128.6, 80.0, 67.1, 48.9, 46.2, 38.4, 27.6, 25.3, 25.0, 25.0.

HRMS (ESI-TOF) Calculated for  $\text{C}_{17}\text{H}_{21}\text{O}_4$   $[\text{M}+\text{H}]^+$ : 289.1440, Found: 289.1452.

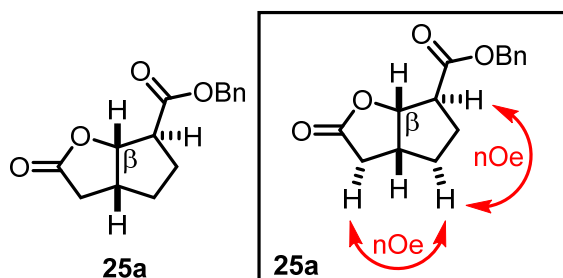

### Benzyl (3*aR*\*,6*S*\*,6*aS*\*)-2-oxohexahydro-2*H*-cyclopenta[*b*]furan-6-carboxylate 25a

Following the general procedure for its synthesis and benzyl ester formation, the compound was purified as the benzyl ester by pTLC (30% EA/hexanes,  $R_f = 0.50$ ). Isolated yield 20% over 2 steps (5.5 mg, 0.020 mmol, colourless oil).

$^1\text{H}$  NMR (500 MHz,  $\text{CDCl}_3$ )  $\delta$  7.41 – 7.31 (m, 5H), 5.20 (dd,  $J = 6.6, 2.2$  Hz, 1H), 5.15 (s, 2H), 3.14 (td,  $J = 7.1, 2.2$  Hz, 1H), 2.97 (dddd,  $J = 9.9, 9.4, 6.6, 6.5, 2.9$  Hz, 1H), 2.81 (dd,  $J = 18.4, 9.9$  Hz, 1H), 2.33 (dd,  $J = 18.4, 2.9$  Hz, 1H), 2.18 – 2.11 (m, 1H), 2.11 – 2.03 (m, 1H), 1.96 (dt,  $J = 12.4, 6.3$  Hz, 1H), 1.55 – 1.47 (m, 1H).

$^{13}\text{C}$  NMR (126 MHz,  $\text{CDCl}_3$ )  $\delta$  176.8, 172.7, 135.7, 128.8, 128.6, 128.3, 87.0, 67.0, 51.1, 38.5, 35.4, 32.6, 28.7.

HRMS (ESI-TOF) Calculated for  $\text{C}_{15}\text{H}_{17}\text{O}_4$   $[\text{M}+\text{H}]^+$ : 261.1127, Found: 261.1130.

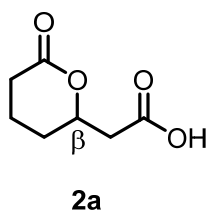

### 2-(6-Oxotetrahydro-2*H*-pyran-2-yl)acetic acid 2a

Following the general procedure for its synthesis, the compound was purified as the acid by column chromatography. Five parallel reactions were carried out to obtain enough material for effective purification, as purification at 0.1 mmol scale was found difficult. (General procedure for gradient elution: begin with 20% EtOAc/hexane + 1% AcOH, and increase the composition of EtOAc by 10% for every 8 mL of eluent used to 100% EtOAc + 1% AcOH). Isolated yield from the parallel reactions 25% (20.0 mg, 0.125 mmol, off white solid).

$^1\text{H}$  NMR (500 MHz,  $\text{CDCl}_3$ )  $\delta$  4.76 (dddd,  $J = 10.7, 7.3, 5.7, 4.4$  Hz, 1H), 2.81 (dd,  $J = 16.4, 7.3$  Hz, 1H), 2.75 – 2.55 (m, 2H), 2.48 (ddd,  $J = 17.8, 9.0, 7.2$  Hz, 1H), 2.05 (dq,  $J = 13.7, 4.4$  Hz, 1H), 2.00 – 1.80 (m, 2H), 1.62 (dddd,  $J = 13.7, 10.9, 10.7, 5.8$  Hz, 1H).

$^{13}\text{C}$  NMR (126 MHz,  $\text{CDCl}_3$ )  $\delta$  175.0, 171.6, 76.4, 40.5, 29.4, 27.5, 18.4.

HRMS (ESI-TOF) Calculated for  $\text{C}_7\text{H}_{11}\text{O}_4$   $[\text{M}-\text{H}]^-$ : 157.0507, Found: 157.0501.

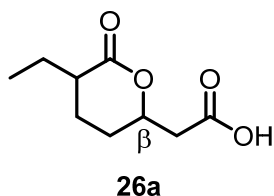

### 2-(5-Ethyl-6-oxotetrahydro-2H-pyran-2-yl)acetic acid 26a

Following the general procedure for its synthesis, the compound was purified as the acid by column chromatography (General procedure for gradient elution: begin with 20% EtOAc/hexane + 1% AcOH, and increase the composition of EtOAc by 10% for every 8 mL of eluent used to 100% EtOAc + 1% AcOH). Isolated yield 31% (5.8 mg, 0.031 mmol, colourless oil, d.r. = 1:1). Diastereomers were not separable by column chromatography,  $^1\text{H}$  and  $^{13}\text{C}$  NMR data reported as a mixture of diastereomers.

$^1\text{H}$  NMR (500 MHz,  $\text{CDCl}_3$ )  $\delta$  4.79 – 4.66 (m, 1H), 2.93 – 2.72 (m, 1H), 2.69 – 2.58 (m, 0H), 2.45 – 2.32 (m, 1H), 2.20 – 2.13 (m, 0H), 2.09 – 2.01 (m, 1H), 2.00 – 1.80 (m, 1H), 1.75 – 1.61 (m, 1H), 1.61 – 1.53 (m, 0H), 1.53 – 1.44 (m, 0H), 1.05 – 0.94 (m, 2H).

$^{13}\text{C}$  NMR (126 MHz,  $\text{CDCl}_3$ )  $\delta$  174.9, 174.9, 173.2, 173.2, 77.0, 73.9, 42.1, 40.7, 39.8, 39.6, 28.6, 26.5, 24.9, 24.8, 23.9, 22.8, 11.7, 11.2.

HRMS (ESI-TOF) Calculated for  $\text{C}_9\text{H}_{14}\text{O}_4\text{Na}$   $[\text{M}+\text{Na}]^+$ : 209.0790, Found: 209.0797.

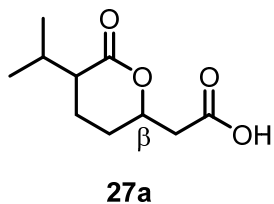

### 2-(5-Isopropyl-6-oxotetrahydro-2H-pyran-2-yl)acetic acid 27a

Following the general procedure for its synthesis, the compound was purified as the acid by column chromatography (General procedure for gradient elution: begin with 20% EtOAc/hexane + 1% AcOH, and increase the composition of EtOAc by 10% for every 8 mL of eluent used to 100% EtOAc + 1% AcOH). Isolated yield 30% (6.0 mg, 0.030 mmol, colourless oil, d.r. : 2.2:1 ). Diastereomers were not separable by column chromatography,  $^1\text{H}$  and  $^{13}\text{C}$  NMR data reported as a mixture of diastereomers.

NMR for minor diastereomer:  $^1\text{H}$  NMR (500 MHz,  $\text{CDCl}_3$ )  $\delta$  4.79 – 4.71 (m, 1H), 2.84 – 2.74 (m, 1H), 2.68 – 2.56 (m, 1H), 2.41 – 2.33 (m, 1H), 2.26 (tt,  $J = 13.2, 6.8$  Hz, 1H), 2.06 – 1.99 (m, 1H), 1.71 – 1.57 (m, 2H), 1.04 – 0.90 (m, 6H).

$^{13}\text{C}$  NMR (126 MHz,  $\text{CDCl}_3$ )  $\delta$  174.4, 174.3, 73.7, 44.0, 39.9, 28.1, 26.9, 20.8, 18.6, 18.4.

NMR for major diastereomer:  $^1\text{H}$  NMR (500 MHz,  $\text{CDCl}_3$ )  $\delta$  4.71 – 4.63 (m, 1H), 2.84 – 2.74 (m, 1H), 2.68 – 2.56 (m, 1H), 2.51 (dp,  $J = 11.0, 5.6$  Hz, 1H), 2.43 (ddd,  $J = 11.0, 6.9, 3.6$  Hz, 1H), 2.12 – 2.06 (m, 1H), 1.92 (ddd,  $J = 13.6, 7.0, 3.0$  Hz, 1H), 1.71 – 1.57 (m, 4H), 1.04 – 0.90 (m, 6H).

$^{13}\text{C}$  NMR (126 MHz,  $\text{CDCl}_3$ )  $\delta$  174.3, 172.9, 73.7, 46.7, 40.8, 29.2, 28.5, 20.0, 20.0, 18.1.

HRMS (ESI-TOF) Calculated for  $\text{C}_{10}\text{H}_{17}\text{O}_4$   $[\text{M}+\text{H}]^+$ : 201.1127, Found: 201.1134.

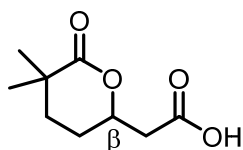

**28a**

### **2-(5,5-Dimethyl-6-oxotetrahydro-2H-pyran-2-yl)acetic acid 28a**

Following the general procedure for its synthesis, the compound was purified as the acid by column chromatography (General procedure for gradient elution: begin with 20% EtOAc/hexane + 1% AcOH, and increase the composition of EtOAc by 10% for every 8 mL of eluent used to 100% EtOAc + 1% AcOH). Isolated yield 31% (5.7 mg, 0.031 mmol, off white solid).

$^1\text{H}$  NMR (500 MHz,  $\text{CDCl}_3$ )  $\delta$  4.82 – 4.68 (m, 1H), 2.79 (dd,  $J = 16.3, 7.1$  Hz, 1H), 2.65 (dd,  $J = 16.3, 5.7$  Hz, 1H), 2.02 – 1.90 (m, 1H), 1.87 – 1.78 (m, 2H), 1.78 – 1.70 (m, 1H), 1.31 (s, 3H), 1.29 (s, 3H).

$^{13}\text{C}$  NMR (126 MHz,  $\text{CDCl}_3$ )  $\delta$  177.2, 174.8, 77.4, 40.8, 38.1, 34.4, 27.9, 27.8, 25.8.

HRMS (ESI-TOF) Calculated for  $\text{C}_9\text{H}_{13}\text{O}_4$   $[\text{M}-\text{H}]^-$ : 185.0814, Found: 185.0815.

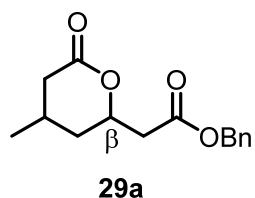

### Benzyl 2-(4-methyl-6-oxotetrahydro-2H-pyran-2-yl)acetate **29a**

Following the general procedure for its synthesis and benzyl ester formation, the compound was purified as the benzyl ester by pTLC (20% EA/hexanes,  $R_f = 0.30$ ). Isolated yield 38% over 2 steps (10.4 mg, 0.040 mmol, colourless oil, d.r. : 1.9:1). Diastereomers were not separable by column chromatography,  $^1\text{H}$  and  $^{13}\text{C}$  NMR data reported as a mixture of diastereomers.

NMR for minor diastereomer:  $^1\text{H}$  NMR (600 MHz,  $\text{CDCl}_3$ )  $\delta$  7.44 – 7.31 (m, 5H), 5.33 – 5.05 (m, 2H), 4.87 (ddd,  $J = 10.5, 6.7, 4.1$  Hz, 1H), 2.93 – 2.78 (m, 1H), 2.66 – 2.56 (m, 2H), 2.24 – 2.15 (m, 2H), 1.83 (ddd,  $J = 14.9, 9.4, 6.2$  Hz, 1H), 1.67 (dt,  $J = 14.2, 5.0$  Hz, 1H), 1.10 (d,  $J = 6.3$  Hz, 3H).

$^{13}\text{C}$  NMR (151 MHz,  $\text{CDCl}_3$ )  $\delta$  171.7, 169.7, 135.6, 128.8, 128.6, 128.5, 73.4, 67.0, 40.4, 37.4, 34.7, 24.0, 21.4.

NMR for major diastereomer:  $^1\text{H}$  NMR (600 MHz,  $\text{CDCl}_3$ )  $\delta$  7.44 – 7.31 (m, 5H), 5.33 – 5.05 (m, 2H), 4.74 (dtd,  $J = 12.2, 6.4, 3.0$  Hz, 1H), 2.93 – 2.78 (m, 1H), 2.75 – 2.66 (m, 1H), 2.66 – 2.56 (m, 1H), 2.13 – 2.06 (m, 2H), 2.05 – 1.97 (m, 1H), 1.27 (dt,  $J = 13.7, 11.5$  Hz, 1H), 1.03 (d,  $J = 6.3$  Hz, 3H).

$^{13}\text{C}$  NMR (151 MHz,  $\text{CDCl}_3$ )  $\delta$  170.7, 169.7, 135.6, 128.8, 128.6, 128.5, 76.5, 66.9, 40.9, 38.0, 36.6, 26.7, 21.7.

HRMS (ESI-TOF) Calculated for  $\text{C}_{15}\text{H}_{19}\text{O}_4$   $[\text{M}+\text{H}]^+$ : 263.1283, Found: 263.1288.

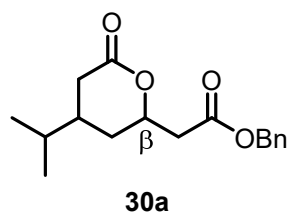

### Benzyl 2-(4-isopropyl-6-oxotetrahydro-2H-pyran-2-yl)acetate **30a**

Following the general procedure for its synthesis and benzyl ester formation, the compound was purified as the benzyl ester by pTLC (20% EA/hexanes,  $R_f = 0.35$ ). Isolated yield 48% over 2 steps (14.0 mg, 0.048 mmol, colourless oil, d.r. : 3.2:1). Diastereomers were not separable by column chromatography,  $^1\text{H}$  and  $^{13}\text{C}$  NMR data reported as a mixture of diastereomers.

NMR for minor diastereomer:  $^1\text{H}$  NMR (500 MHz,  $\text{CDCl}_3$ )  $\delta$  7.45 – 7.29 (m, 5H), 5.16 (s, 2H), 4.79 – 4.74 (m, 1H), 2.90 – 2.79 (m, 1H), 2.70 – 2.57 (m, 1H), 2.53 (dd,  $J = 15.8, 5.4$  Hz, 1H), 2.29 (dd,  $J = 15.8, 10.9$  Hz, 1H), 1.83 – 1.71 (m, 3H), 1.59 (m, 1H), 0.93 – 0.86 (m, 6H).

$^{13}\text{C}$  NMR (126 MHz,  $\text{CDCl}_3$ )  $\delta$  172.7, 169.7, 135.6, 128.8, 128.6, 128.5, 73.7, 67.0, 40.2, 35.3, 33.1, 32.3, 30.9, 19.5, 19.3.

NMR for major diastereomer:  $^1\text{H}$  NMR (500 MHz,  $\text{CDCl}_3$ )  $\delta$  7.45 – 7.29 (m, 5H), 5.16 (s, 2H), 4.70 (dtd,  $J = 12.4, 6.4, 2.7$  Hz, 1H), 2.90 – 2.79 (m, 1H), 2.70 – 2.57 (m, 2H), 2.16 (dd,  $J = 17.8, 10.5$  Hz, 1H), 2.00 (ddt,  $J = 13.6, 4.2, 2.2$  Hz, 1H), 1.83 – 1.71 (m, 1H), 1.51 (h,  $J = 6.7$  Hz, 1H), 1.28 (dt,  $J = 14.1, 12.2$  Hz, 1H), 0.93 – 0.86 (m, 6H).

$^{13}\text{C}$  NMR (126 MHz,  $\text{CDCl}_3$ )  $\delta$  171.3, 169.7, 135.6, 128.8, 128.6, 128.5, 76.4, 66.9, 40.9, 37.8, 33.8, 32.4, 32.0, 19.3, 19.2.

HRMS (ESI-TOF) Calculated for  $\text{C}_{17}\text{H}_{22}\text{O}_4\text{Na}$   $[\text{M}+\text{Na}]^+$ : 313.1416, Found: 313.1429.

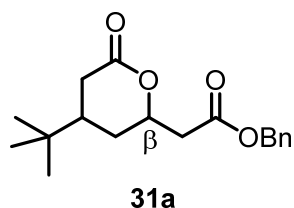

### Benzyl 2-(4-(*tert*-butyl)-6-oxotetrahydro-2*H*-pyran-2-yl)acetate 31a

Following the general procedure for its synthesis and benzyl ester formation, the compound was purified as the benzyl ester by pTLC (20% EA/hexanes,  $R_f = 0.30$ ). Isolated yield 50% over 2 steps (15.2 mg, 0.050 mmol, colourless oil, d.r. : 5:1). Diastereomers were not separable by column chromatography,  $^1\text{H}$  and  $^{13}\text{C}$  NMR data reported as a mixture of diastereomers.

$^1\text{H}$  NMR (500 MHz,  $\text{CDCl}_3$ )  $\delta$  7.53 – 7.33 (m, 5H), 5.18 (s, 2H), 4.71 (ddt,  $J = 11.6, 6.4, 3.2$  Hz, 1H), 2.86 (dd,  $J = 16.0, 6.6$  Hz, 1H), 2.67 (dd,  $J = 15.9, 6.1$  Hz, 1H), 2.68 – 2.61 (m, 1H), 2.26 (dd,  $J = 17.8, 10.4$  Hz, 1H), 2.00 (ddt,  $J = 13.6, 4.3, 2.3$  Hz, 1H), 1.87 – 1.74 (m, 1H), 1.31 (dt,  $J = 13.3, 11.8$  Hz, 1H), 0.89 (s, 9H).

$^{13}\text{C}$  NMR (126 MHz,  $\text{CDCl}_3$ )  $\delta$  171.6, 169.6, 135.5, 128.7, 128.5, 128.4, 76.3, 66.8, 41.5, 40.8, 32.3, 31.7, 30.1, 26.5.

HRMS (ESI-TOF) Calculated for  $\text{C}_{18}\text{H}_{25}\text{O}_4$   $[\text{M}+\text{H}]^+$ : 305.1753, Found: 305.1754.

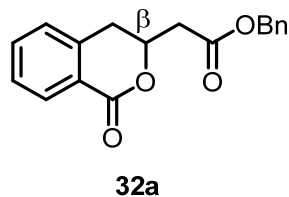

### Benzyl 2-(1-oxoisochroman-3-yl)acetate 32a

Following the general procedure for its synthesis and benzyl ester formation, the compound was purified as the benzyl ester by pTLC (20% EA/hexanes,  $R_f = 0.30$ ). Isolated yield 71% over 2 steps (21.0 mg, 0.071 mmol, off white solid).

$^1\text{H}$  NMR (400 MHz,  $\text{CDCl}_3$ )  $\delta$  8.09 (dd,  $J = 7.8, 1.4$  Hz, 1H), 7.55 (td,  $J = 7.5, 1.4$  Hz, 1H), 7.45 – 7.31 (m, 6H), 7.23 (d,  $J = 7.6$  Hz, 1H), 5.18 (s, 2H), 5.00 (p,  $J = 6.9$  Hz, 1H), 3.08 – 2.98 (m, 3H), 2.79 (dd,  $J = 16.2, 6.9$  Hz, 1H).

$^{13}\text{C}$  NMR (100 MHz,  $\text{CDCl}_3$ )  $\delta$  169.6, 165.0, 138.5, 135.5, 134.1, 130.5, 128.8, 128.6, 128.5, 128.0, 127.6, 125.0, 74.7, 67.0, 39.9, 32.9.

HRMS (ESI-TOF) Calculated for  $\text{C}_{18}\text{H}_{17}\text{O}_4$   $[\text{M}+\text{H}]^+$ : 297.1127, Found: 297.1131.



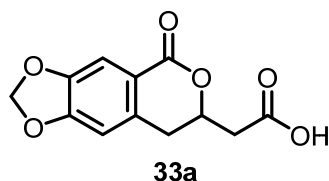

### 2-(5-Oxo-7,8-dihydro-5H-[1,3]dioxolo[4,5-g]isochromen-7-yl)acetic acid **33a**

Following the general procedure for its synthesis, the compound was purified by pTLC (50% EA/hexanes, 2% AcOH). Isolated yield 75% (18.7 mg, 0.075 mmol, off white solid).

$^1\text{H}$  NMR (600 MHz,  $\text{CD}_3\text{OD}$ )  $\delta$  7.36 (s, 1H), 6.81 (d,  $J = 0.9$  Hz, 1H), 6.08 – 6.04 (m, 2H), 4.91 (dddd,  $J = 11.3, 7.4, 5.5, 4.0$  Hz, 1H), 3.06 – 2.94 (m, 2H), 2.85 – 2.74 (m, 2H).

$^{13}\text{C}$  NMR (151 MHz,  $\text{CD}_3\text{OD}$ )  $\delta$  173.4, 166.9, 154.3, 149.0, 137.5, 119.2, 109.6, 108.4, 103.6, 76.7, 40.4, 33.4.

HRMS (ESI-TOF) Calculated for  $\text{C}_{12}\text{H}_{10}\text{O}_6\text{Na}$   $[\text{M}+\text{Na}]^+$ : 273.0375, found 273.0384.

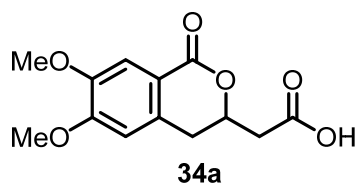

### 2-(6,7-Dimethoxy-1-oxoisochroman-3-yl)acetic acid **34a**

Following the general procedure for its synthesis, the compound was purified by pTLC (50% EA/hexanes, 2% AcOH). Isolated yield 75% (19.9 mg, 0.075 mmol, off white solid).

$^1\text{H}$  NMR (600 MHz,  $\text{CD}_3\text{OD}$ )  $\delta$  7.49 (s, 1H), 6.91 (s, 1H), 4.94 (dddd,  $J = 11.3, 7.4, 5.6, 4.0$  Hz, 1H), 3.92 (s, 3H), 3.86 (s, 3H), 3.09 – 2.97 (m, 2H), 2.87 – 2.76 (m, 2H).

$^{13}\text{C}$  NMR (151 MHz,  $\text{CD}_3\text{OD}$ )  $\delta$  173.4, 167.4, 155.9, 150.0, 135.6, 117.6, 112.7, 111.0, 77.0, 56.7, 56.5, 40.5, 33.0.

HRMS (ESI-TOF) Calculated for  $\text{C}_{13}\text{H}_{15}\text{O}_6$   $[\text{M}+\text{H}]^+$ : 267.0869, found 267.0875.

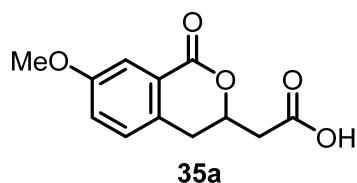

### 2-(7-Methoxy-1-oxoisochroman-3-yl)acetic acid **35a**

Following the general procedure for its synthesis, the compound was purified by pTLC (50% EA/hexanes, 2% AcOH). Isolated yield 80% (18.9 mg, 0.08 mmol, off white solid).

$^1\text{H}$  NMR (600 MHz,  $\text{CD}_3\text{OD}$ )  $\delta$  7.49 (d,  $J = 2.7$  Hz, 1H), 7.26 (d,  $J = 8.3$  Hz, 1H), 7.17 (dd,  $J = 8.4$ , 2.8 Hz, 1H), 4.93 (dddd,  $J = 11.1$ , 7.5, 5.6, 3.5 Hz, 1H), 3.83 (s, 3H), 3.07 – 2.93 (m, 2H), 2.86 – 2.74 (m, 2H).

$^{13}\text{C}$  NMR (151 MHz,  $\text{CD}_3\text{OD}$ )  $\delta$  172.7, 165.8, 159.2, 131.5, 128.7, 125.2, 121.0, 112.8, 76.0, 54.6, 39.4, 31.2.

HRMS (ESI-TOF) Calculated for  $\text{C}_{12}\text{H}_{13}\text{O}_5$   $[\text{M}+\text{H}]^+$ : 237.0763, found 237.0762.

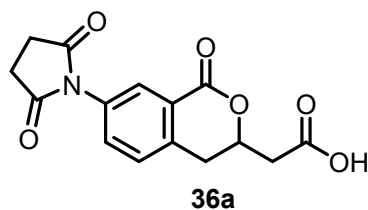

### 2-(7-(2,5-Dioxopyrrolidin-1-yl)-1-oxoisochroman-3-yl)acetic acid **36a**

Following the general procedure for its synthesis, the compound was purified by pTLC (50% EA/hexanes, 2% AcOH). Isolated yield 80% (24.3 mg, 0.08 mmol, off white solid).

$^1\text{H}$  NMR (600 MHz, DMSO)  $\delta$  7.88 – 7.84 (m, 1H), 7.55 – 7.51 (m, 2H), 4.93 (dddd,  $J = 9.4$ , 7.6, 4.7, 3.2 Hz, 1H), 3.17 – 3.07 (m, 2H), 2.86 – 2.72 (m, 6H).

$^{13}\text{C}$  NMR (151 MHz, DMSO)  $\delta$  176.9, 171.1, 163.7, 139.2, 132.4, 132.0, 128.6, 127.8, 124.9, 75.2, 39.3, 31.4, 28.6.

HRMS (ESI-TOF) Calculated for  $\text{C}_{15}\text{H}_{14}\text{NO}_6$   $[\text{M}+\text{H}]^+$ : 304.0821, found 304.0820.

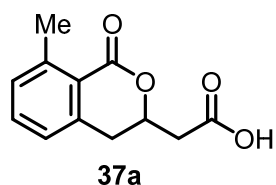

### 2-(8-Methyl-1-oxoisochroman-3-yl)acetic acid **37a**

Following the general procedure for its synthesis, the compound was purified by pTLC (50% EA/hexanes, 2% AcOH). Isolated yield 85% (18.7 mg, 0.085 mmol, off white solid).

$^1\text{H}$  NMR (600 MHz,  $\text{CD}_3\text{OD}$ )  $\delta$  7.44 (t,  $J = 7.6$  Hz, 1H), 7.25 (d,  $J = 7.7$  Hz, 1H), 7.18 (d,  $J = 7.5$  Hz, 1H), 4.84 (dddd,  $J = 11.0, 7.4, 5.6, 3.3$  Hz, 1H), 3.12 – 2.97 (m, 2H), 2.85 – 2.71 (m, 2H), 2.61 (s, 3H).

$^{13}\text{C}$  NMR (151 MHz,  $\text{CD}_3\text{OD}$ )  $\delta$  173.6, 166.6, 143.8, 141.8, 134.3, 132.1, 126.7, 124.3, 76.2, 40.4, 34.6, 22.2.

HRMS (ESI-TOF) Calculated for  $\text{C}_{12}\text{H}_{13}\text{O}_4$   $[\text{M}+\text{H}]^+$ : 221.0814, found 221.0813.

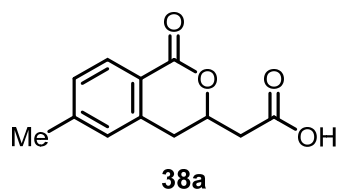

### 2-(6-Methyl-1-oxoisochroman-3-yl)acetic acid **38a**

Following the general procedure for its synthesis, the compound was purified by pTLC (50% EA/hexanes, 2% AcOH). Isolated yield 80% (17.6mg, 0.08 mmol, off white solid).

$^1\text{H}$  NMR (600 MHz,  $\text{CDCl}_3$ )  $\delta$  7.95 (s, 1H), 7.19 (dd,  $J = 8.0, 1.7$  Hz, 1H), 7.06 (s, 1H), (p,  $J = 6.9$  Hz, 1H), 3.02 (d,  $J = 7.3$  Hz, 2H), 2.97 (dd,  $J = 16.5, 6.7$  Hz, 1H), 2.79 (dd,  $J = 16.5, 6.2$  Hz, 1H), 2.40 (s, 3H).

$^{13}\text{C}$  NMR (151 MHz,  $\text{CDCl}_3$ )  $\delta$  174.8, 165.4, 145.3, 138.5, 130.6, 129.0, 128.2, 122.1, 74.5, 39.7, 32.8, 21.9.

HRMS (ESI-TOF) Calculated for  $\text{C}_{12}\text{H}_{13}\text{O}_4$   $[\text{M}+\text{H}]^+$ : 221.0814, found 221.0816.

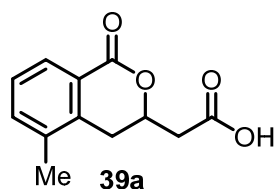

### 2-(5-Methyl-1-oxoisochroman-3-yl)acetic acid **39a**

Following the general procedure for its synthesis, the compound was purified by pTLC (50% EA/hexanes, 2% AcOH). Isolated yield 80% (17.6 mg, 0.080 mmol, off white solid).

$^1\text{H}$  NMR (600 MHz,  $\text{CD}_3\text{OD}$ )  $\delta$  7.87 (dd,  $J = 7.8, 1.3$  Hz, 1H), 7.48 (d,  $J = 7.5$  Hz, 1H), 7.31 (t,  $J = 7.7$  Hz, 1H), 4.93 (dddd,  $J = 11.5, 6.9, 5.9, 3.3$  Hz, 1H), 3.17 (dd,  $J = 16.7, 3.3$  Hz, 1H), 2.94 – 2.87 (m, 1H), 2.85 (dd,  $J = 16.7, 11.5$  Hz, 2H), 2.34 (s, 3H).

$^{13}\text{C}$  NMR (151 MHz,  $\text{CD}_3\text{OD}$ )  $\delta$  173.4, 167.6, 139.3, 137.0, 136.6, 128.7, 128.2, 125.7, 76.2, 40.5, 30.5, 18.8.

HRMS (ESI-TOF) Calculated for  $\text{C}_{12}\text{H}_{13}\text{O}_4$   $[\text{M}+\text{H}]^+$ : 221.0814, found 221.0824.

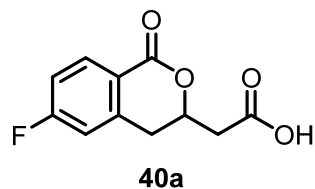

### 2-(6-Fluoro-1-oxoisochroman-3-yl)acetic acid **40a**

Following the general procedure for its synthesis, the compound was purified by pTLC (50% EA/hexanes, 2% AcOH). Isolated yield 68% (15.2mg, 0.068 mmol, off white solid).

$^1\text{H}$  NMR (600 MHz,  $\text{CD}_3\text{OD}$ )  $\delta$  8.07 (dd,  $J = 8.6, 5.7$  Hz, 1H), 7.20 – 7.09 (m, 2H), 4.98 (dddd,  $J = 10.0, 7.3, 5.6, 4.2$  Hz, 1H), 3.17 – 3.03 (m, 2H), 2.90 – 2.75 (m, 2H).

$^{13}\text{C}$  NMR (151 MHz,  $\text{CD}_3\text{OD}$ )  $\delta$  173.4, 167.5 (d,  $J = 254.8$  Hz), 166.2, 144.3, 134.1 (d,  $J = 10.1$  Hz), 122.4, 116.2 (d,  $J = 22.6$  Hz), 115.8 (d,  $J = 22.6$  Hz), 76.8, 40.5, 33.1.

$^{19}\text{F}$  NMR (471 MHz,  $\text{CD}_3\text{OD}$ )  $\delta$  -106.01.

HRMS (ESI-TOF) Calculated for  $\text{C}_{11}\text{H}_{10}\text{FO}_4$   $[\text{M}+\text{H}]^+$ : 225.0563, found 225.0560.

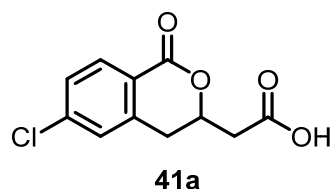

### 2-(6-Chloro-1-oxoisochroman-3-yl)acetic acid 41a

Following the general procedure for its synthesis, the compound was purified by pTLC (50% EA/hexanes, 2% AcOH). Isolated yield 78% (18.7 mg, 0.078 mmol, off white solid).

$^1\text{H}$  NMR (600 MHz,  $\text{CD}_3\text{OD}$ )  $\delta$  7.98 (d,  $J = 8.2$  Hz, 1H), 7.47 – 7.42 (m, 2H), 4.97 (dddd,  $J = 10.2, 7.3, 5.6, 4.5$  Hz, 1H), 3.17 – 3.05 (m, 2H), 2.88 – 2.77 (m, 2H).

$^{13}\text{C}$  NMR (151 MHz,  $\text{CD}_3\text{OD}$ )  $\delta$  173.2, 166.2, 142.8, 141.4, 132.6, 129.2, 128.9, 124.6, 76.8, 40.4, 33.1.

HRMS (ESI-TOF) Calculated for  $\text{C}_{11}\text{H}_{10}\text{ClO}_4$   $[\text{M}+\text{H}]^+$ : 241.0268, found 241.0264.

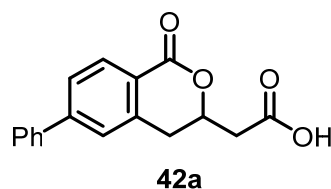

### 2-(1-Oxo-6-phenylisochroman-3-yl)acetic acid 42a

Following the general procedure for its synthesis, the compound was purified by pTLC (50% EA/hexanes, 2% AcOH). Isolated yield 75% (21.2 mg, 0.075 mmol, off white solid).

$^1\text{H}$  NMR (600 MHz,  $\text{CD}_3\text{OD}$ )  $\delta$  8.07 (d,  $J = 8.1$  Hz, 1H), 7.71 – 7.66 (m, 3H), 7.63 – 7.60 (m, 1H), 7.51 – 7.45 (m, 2H), 7.44 – 7.38 (m, 1H), 5.00 (dddd,  $J = 11.0, 7.3, 5.5, 3.6$  Hz, 1H), 3.23 – 3.09 (m, 2H), 2.90 – 2.80 (m, 2H).

$^{13}\text{C}$  NMR (151 MHz,  $\text{CD}_3\text{OD}$ )  $\delta$  173.4, 167.2, 148.3, 141.4, 140.8, 131.6, 130.1, 129.6, 128.3, 127.4, 127.2, 124.5, 76.9, 40.5, 33.5.

HRMS (ESI-TOF) Calculated for  $\text{C}_{17}\text{H}_{15}\text{O}_4$   $[\text{M}+\text{H}]^+$ : 283.0970, found 283.0966.

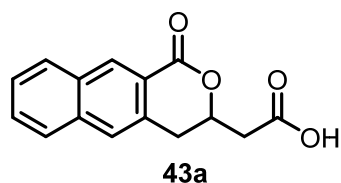

### 2-(1-Oxo-3,4-dihydro-1H-benzo[g]isochromen-3-yl)acetic acid 43a

Following the general procedure for its synthesis, the compound was purified by pTLC (50% EA/hexanes, 2% AcOH). Isolated yield 85% (21.8 mg, 0.085 mmol, off white solid).

$^1\text{H}$  NMR (600 MHz,  $\text{CD}_3\text{OD}$ )  $\delta$  8.63 (s, 1H), 8.01 (d,  $J = 8.2$  Hz, 1H), 7.90 (dd,  $J = 8.3, 1.1$  Hz, 1H), 7.80 (s, 1H), 7.64 (ddd,  $J = 8.3, 6.8, 1.2$  Hz, 1H), 7.55 (ddd,  $J = 8.1, 6.8, 1.2$  Hz, 1H), 5.03 (dddd,  $J = 11.0, 7.2, 5.4, 3.3$  Hz, 1H), 3.33 – 3.27 (m, 2H), 3.21 (ddd,  $J = 16.0, 11.0, 1.5$  Hz, 1H), 2.93 – 2.76 (m, 2H).

$^{13}\text{C}$  NMR (151 MHz,  $\text{CD}_3\text{OD}$ )  $\delta$  173.4, 167.5, 137.5, 135.2, 133.5, 133.0, 130.5, 130.3, 128.5, 127.7, 127.2, 123.7, 77.2, 40.6, 33.8.

HRMS (ESI-TOF) Calculated for  $\text{C}_{15}\text{H}_{13}\text{O}_4$   $[\text{M}+\text{H}]^+$ : 257.0814, found 257.0819.

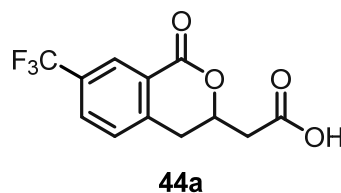

### 2-(1-Oxo-7-(trifluoromethyl)isochroman-3-yl)acetic acid 44a

Following the general procedure for its synthesis, the compound was purified by pTLC (50% EA/hexanes, 2% AcOH). Isolated yield 85% (23.3 mg, 0.085 mmol, off white solid).

$^1\text{H}$  NMR (600 MHz,  $\text{CDCl}_3$ )  $\delta$  8.37 (s, 1H), 7.81 (dd,  $J = 8.2, 2.0$  Hz, 1H), 7.44 (d,  $J = 9.5$  Hz, 1H), 5.02 (dddd,  $J = 9.9, 7.0, 6.1, 4.7$  Hz, 1H), 3.22 – 3.12 (m, 2H), 3.02 (dd,  $J = 16.6, 7.0$  Hz, 1H), 2.85 (dd,  $J = 16.6, 6.1$  Hz, 1H).

$^{13}\text{C}$  NMR (151 MHz,  $\text{CDCl}_3$ )  $\delta$  174.9, 163.7, 142.1, 131.0(q,  $J = 33.0$  Hz), 130.6 (q,  $J = 3.6$  Hz), 128.5, 127.7 (q,  $J = 3.9$  Hz), 125.5, 123.5 (q,  $J = 272.3$  Hz), 74.4, 39.5, 32.7.

$^{19}\text{F}$  NMR (376 MHz,  $\text{CDCl}_3$ )  $\delta$  -65.56.

HRMS (ESI-TOF) Calculated for  $\text{C}_{12}\text{H}_{10}\text{O}_4\text{F}_3$   $[\text{M}+\text{H}]^+$ : 275.0531, found 275.0529.

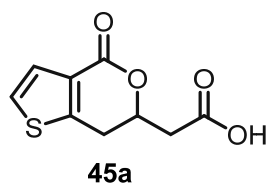

**2-(4-Oxo-6,7-dihydro-4H-thieno[3,2-c]pyran-6-yl)acetic acid 45a**

Following the general procedure for its synthesis, the compound was purified by pTLC (50% EA/hexanes, 2% AcOH). Isolated yield 30% (6.4 mg, 0.03 mmol, off white solid).

$^1\text{H}$  NMR (600 MHz,  $\text{CD}_3\text{OD}$ )  $\delta$  7.40 – 7.34 (m, 2H), 5.04 (dddd,  $J = 11.3, 7.4, 5.6, 3.7$  Hz, 1H), 3.34 (dd,  $J = 16.5, 3.7$  Hz, 1H), 3.13 (dd,  $J = 17.0, 11.3$  Hz, 1H), 2.85 (qd,  $J = 16.2, 6.5$  Hz, 2H).

$^{13}\text{C}$  NMR (151 MHz,  $\text{CD}_3\text{OD}$ )  $\delta$  173.7, 163.4, 151.4, 128.5, 127.1, 125.9, 78.0, 40.6, 29.9.

HRMS (ESI-TOF) Calculated for  $\text{C}_9\text{H}_9\text{O}_4\text{S}$   $[\text{M}+\text{H}]^+$ : 213.0222, found 213.0221.

## 2.4 Synthesis and characterization of substrates for $\beta$ -directed, $\gamma$ -C–H lactonization reaction

### General procedure A for the preparation of $\alpha$ -substituted hexanedioic acids:

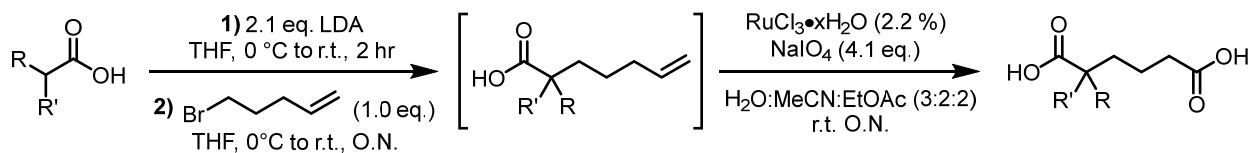

A solution of *n*BuLi (2.5M in hexanes, 2.1 eq.) was added to a solution of DIPA (2.0 eq.) in THF (0.1M) at 0 °C. The resultant solution was stirred at 0 °C for 30 minutes. A carboxylic acid (10.0 mmol, 1.0 eq.) was dissolved in THF (5.0 mL) and added dropwise to the LDA solution at 0 °C, in which the solution was warmed to r.t and stirred for 2 hours. The reaction mixture was then cooled to 0 °C and a solution of 5-bromo-1-pentene (10.0 mmol, 1.0 eq.) in THF (5.0 mL) was added. The reaction was warmed to room temperature and stirred overnight. The completion of the reaction was confirmed by TLC analysis of the reaction mixture. The reaction was then quenched with aq. HCl (1.0 M) and extracted three times with EtOAc. The combined organic layer was dried with anhydrous MgSO<sub>4</sub>, filtered, and concentrated under vacuum. The crude obtained was directly used for the next step without further purification.

To the crude carboxylic acid obtained in the previous step was added a 3:2:2 ratio of H<sub>2</sub>O, MeCN, and EtOAc (0.3 M) at room temperature, followed by RuCl<sub>3</sub>·xH<sub>2</sub>O (2.2 mol%). The reaction was stirred vigorously and NaIO<sub>4</sub> (4.1 eq.) was added in portions over 1 hour. The reaction mixture was then stirred at room temperature overnight. The reaction mixture was then diluted with water and extracted with EtOAc three times. The combined organic layer was dried with anhydrous MgSO<sub>4</sub>, filtered, and concentrated under vacuum. The desired  $\alpha$ -substituted hexanedioic acids were obtained after purification by flash column chromatography on silica gel (specific elution conditions are described for each compound below).

### General procedure B for the preparation of $\alpha$ -substituted hexanedioic acids:

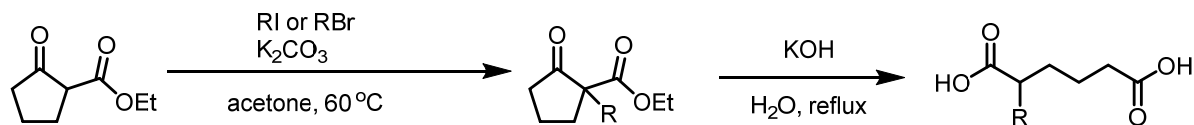

To a stirred suspension of dry potassium carbonate (16.0 mmol) in anhydrous acetone (45 mL) under N<sub>2</sub> was added ethyl 2-oxocyclopentane-1-carboxylate (8.0 mmol) followed by alkyl-iodide or alkyl-bromide (24 mmol). The reaction was heated to 60 °C and stirred overnight. The cooled reaction mixture was diluted with diethyl ether (200 mL) and then filtered. The filtrate was concentrated under reduced pressure and the residue was purified by flash column chromatography on silica gel to give the alkyl-keto ester.

20% aq. KOH (6 mL) was added to a solution 1-alkyl-keto ester (6 mmol) in methanol (6 mL), then the mixture was refluxed and stirred overnight. The cold mixture was extracted with ether. And the aqueous phase solution was acidified with 6M aq. HCl to pH ~ 2 followed by another extraction with EtOAc (three times). The combined organic layer obtained from extraction of the acidic aqueous layer was dried with anhydrous MgSO<sub>4</sub>, filtered, and concentrated under vacuum. The desired product was obtained after recrystallization by Et<sub>2</sub>O and hexane.



### General procedure A for the preparation of $\alpha$ -substituted heptanedioic acids:

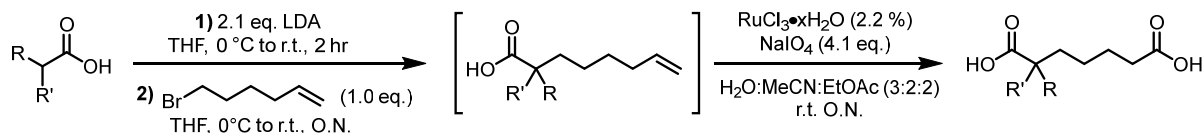

A solution of *n*BuLi (2.5M in hexanes, 2.1 eq.) was added to a solution of DIPA (2.0 eq.) in THF (0.1M) at 0 °C. The resultant solution was stirred at 0 °C for 30 minutes. A carboxylic acid (10.0 mmol, 1.0 eq.) was dissolved in THF (5.0 mL) and added dropwise to the LDA solution at 0 °C, in which the solution was warmed to r.t and stirred for 2 hours. The reaction mixture was then cooled to 0 °C and a solution of 6-bromo-1-hexene (10.0 mmol, 1.0 eq.) in THF (5.0 mL) was added. The reaction was warmed to room temperature and stirred overnight. The completion of the reaction was confirmed by TLC analysis of the reaction mixture. The reaction was then quenched with aq. HCl (1.0 M) and extracted three times with EtOAc. The combined organic layer was dried with anhydrous MgSO<sub>4</sub>, filtered, and concentrated under vacuum. The crude obtained was directly used for the next step without further purification.

To the crude carboxylic acid obtained in the previous step was added a 3:2:2 ratio of H<sub>2</sub>O, MeCN, and EtOAc (0.3 M) at room temperature, followed by RuCl<sub>3</sub>·xH<sub>2</sub>O (2.2 mol%). The reaction was stirred vigorously and NaIO<sub>4</sub> (4.1 eq.) was added in portions over 1 hour. The reaction mixture was then stirred at room temperature overnight. The reaction mixture was then diluted with water and extracted with EtOAc three times. The combined organic layer was dried with anhydrous MgSO<sub>4</sub>, filtered, and concentrated under vacuum. The desired  $\alpha$ -substituted hexanedioic acids were obtained after purification by flash column chromatography on silica gel (specific elution conditions are described for each compound below).

### General procedure B for the preparation of $\alpha$ -substituted heptanedioic acids:

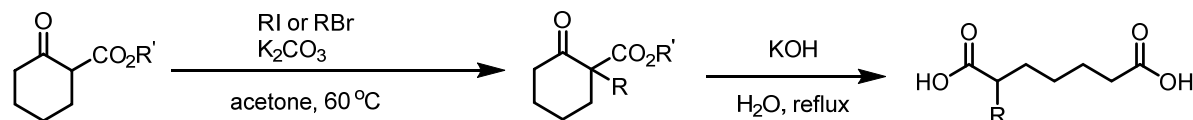

To a stirred suspension of dry potassium carbonate (16.0 mmol) in anhydrous acetone (45 mL) under N<sub>2</sub> was added methyl or ethyl 2-oxocyclohexanecarboxylate (8.0 mmol) followed by alkyl-iodide or alkyl-bromide (24 mmol). The reaction was heated to 60 °C and stirred overnight. The cooled reaction mixture was diluted with diethyl ether and then filtered. The filtrate was concentrated under reduced pressure and the residue was purified by flash column chromatography on silica gel to give the alkyl-keto ester.

20% aq. KOH (6 mL) was added to a solution alkyl-keto ester (6 mmol) in methanol (6 mL), then the mixture was refluxed and stirred overnight. The cold mixture was extracted with ether. And the aqueous phase solution was acidified with 6M aq. HCl to pH ~ 2 followed by another extraction with EtOAc (three times). The combined organic layer obtained from extraction of the acidic aqueous layer was dried with anhydrous MgSO<sub>4</sub>, filtered, and concentrated under vacuum. The desired product was obtained after recrystallization by Et<sub>2</sub>O and hexane.

### General procedure A for the preparation of $\beta$ -substituted heptanedioic acids:

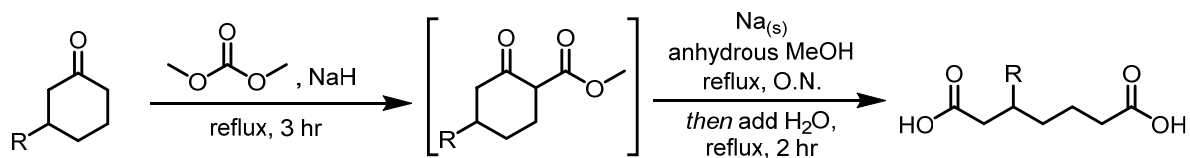

3-Alkylcyclohexanone (8.0 mmol) was dissolved in dimethylcarbonate (15.0 mL) and NaH (0.5 g, 12.2 mmol, 60% dispersion in mineral oil) was added. The reaction mixture was heated to reflux and stirred at this temperature (90 °C) for 3 hours. The reaction was then quenched with sat.  $\text{NH}_4\text{Cl}$  and extracted with EtOAc. The combined organic layer was dried with anhydrous  $\text{MgSO}_4$ , filtered, and evaporated to dryness to provide the crude  $\beta$ -keto ester.

Sodium metal (1.0 g, 32.0 mmol) was divided into small pieces with a spatula and introduced portionwise to ice-cold anhydrous MeOH (30 mL) with vigorous stirring. After the complete addition of sodium metal, the crude  $\beta$ -keto ester obtained above was dissolved in anhydrous MeOH (5.0 mL) and added dropwise to the ice-cold reaction mixture. The reaction mixture was warmed to room temperature, then heated to reflux, and stirred at this temperature overnight. Water (5.0 mL) was then added to the refluxing reaction mixture and stirring was continued at reflux for 2 hours. The reaction mixture was cooled to room temperature and the MeOH was removed under vacuum. The aqueous residue was extracted with EtOAc three times, and then acidified to pH  $\sim$  2 with 6M aq. HCl followed by another extraction with EtOAc (three times). The combined organic layer obtained from extraction of the acidic aqueous layer was dried with anhydrous  $\text{MgSO}_4$ , filtered, and concentrated under vacuum. The desired product was obtained after purification by flash column chromatography on silica gel (specific elution conditions are described for each compound below).

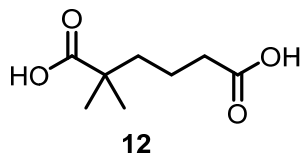

### 2,2-Dimethylhexanedioic acid 12

This compound was prepared according to the general procedure A for the preparation of  $\alpha$ -substituted hexanedioic acids.

Elution condition: (20% EA/hexanes + 1% AcOH to 50% EA/hexanes + 1% AcOH, gradient elution)

Isolated yield: 52% over 2 steps (0.91 g, 5.2 mmol, white solid)

$^1\text{H}$  NMR (500 MHz, DMSO)  $\delta$  12.03 (s, 2H), 2.32 – 2.04 (m, 2H), 1.75 – 1.37 (m, 4H), 1.07 (s, 6H).

$^{13}\text{C}$  NMR (126 MHz, DMSO)  $\delta$  178.7, 174.3, 41.1, 39.5, 34.1, 25.0, 24.9, 20.2.

HRMS (ESI-TOF) Calculated for  $\text{C}_8\text{H}_{13}\text{O}_4$   $[\text{M}-\text{H}]^-$ : 173.0814, Found: 173.0820.

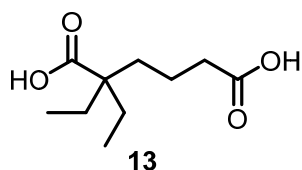

### 2,2-Diethylhexanedioic acid 13

This compound was prepared according to the general procedure A for the preparation of  $\alpha$ -substituted hexanedioic acids.

Elution condition: (20% EA/hexanes + 1% AcOH to 50% EA/hexanes + 1% AcOH, gradient elution)

Isolated yield: 60% over 2 steps (1.21 g, 6.0 mmol, white solid)

$^1\text{H}$  NMR (500 MHz, DMSO)  $\delta$  12.04 (s, 2H), 2.19 (t,  $J = 7.0$  Hz, 2H), 1.55 – 1.40 (m, 6H), 1.40 – 1.28 (m, 2H), 0.73 (t,  $J = 7.4$  Hz, 6H).

$^{13}\text{C}$  NMR (126 MHz, DMSO)  $\delta$  177.8, 174.3, 48.4, 34.1, 32.3, 26.2, 19.1, 8.2.

HRMS (ESI-TOF) Calculated for  $\text{C}_{10}\text{H}_{17}\text{O}_4$   $[\text{M}-\text{H}]^-$ : 201.1127, Found: 201.1128.

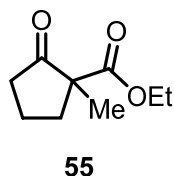

### Ethyl 1-methyl-2-oxocyclopentane-1-carboxylate 55

This compound was prepared according to the general procedure B for the preparation of  $\alpha$ -substituted hexanedioic acids by the reaction with MeI. Quantative yield, (1.36 g, 8.0 mmol, colorless oil).

$^1\text{H}$  NMR (600 MHz,  $\text{CDCl}_3$ )  $\delta$  4.20 – 4.07 (m, 2H), 2.54 – 2.50 (m, 1H), 2.50 – 2.39 (m, 1H), 2.35 – 2.26 (m, 1H), 2.10 – 2.00 (m, 1H), 1.97 – 1.81 (m, 2H), 1.30 (s, 3H), 1.24 (td,  $J = 7.1, 0.5$  Hz, 3H).

$^{13}\text{C}$  NMR (151 MHz,  $\text{CDCl}_3$ )  $\delta$  216.1, 172.5, 61.5, 56.0, 37.8, 36.3, 19.7, 19.5, 14.2.

The data is consistent with those reported in the literature.<sup>(40)</sup>

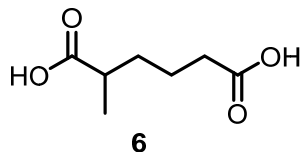

### 2-Methylhexanedioic acid 6

This compound was prepared according to the general procedure B for the preparation of  $\alpha$ -substituted hexanedioic acids. 87% yield, (0.84 g, 5.22 mmol, white solid).

$^1\text{H}$  NMR (600 MHz,  $\text{CDCl}_3$ )  $\delta$  2.52 – 2.45 (m, 1H), 2.44 – 2.33 (m, 2H), 1.79 – 1.65 (m, 3H), 1.55 – 1.46 (m, 1H), 1.20 (dd,  $J = 7.0, 1.0$  Hz, 3H).

$^{13}\text{C}$  NMR (151 MHz,  $\text{CDCl}_3$ )  $\delta$  182.5, 179.8, 47.0, 34.1, 31.1, 25.3, 22.7, 11.8.

HRMS (ESI-TOF) Calculated for  $\text{C}_7\text{H}_{11}\text{O}_4$   $[\text{M}-\text{H}]^-$ : 159.0657, found 159.0653.

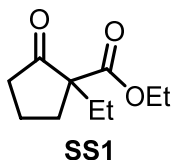

### **Ethyl 1-ethyl-2-oxocyclopentane-1-carboxylate SS1**

This compound was prepared according to the general procedure B for the preparation of  $\alpha$ -substituted hexanedioic acids by the reaction with EtI. 95% yield, (1.4 g, 7.6 mmol, colorless oil).

$^1\text{H}$  NMR (600 MHz,  $\text{CDCl}_3$ )  $\delta$  4.22 – 4.10 (m, 2H), 2.55 – 2.46 (m, 1H), 2.46 – 2.36 (m, 1H), 2.33 – 2.19 (m, 1H), 2.05 – 1.84 (m, 4H), 1.68 – 1.58 (m, 1H), 1.29 – 1.21 (m, 3H), 0.89 (t,  $J = 7.5$  Hz, 3H).

$^{13}\text{C}$  NMR (151 MHz,  $\text{CDCl}_3$ )  $\delta$  215.3, 171.3, 77.4, 77.2, 77.0, 61.4, 61.0, 38.2, 38.2, 32.4, 26.9, 19.7, 14.2, 9.3.

The data is consistent with those reported in the literature.<sup>(40)</sup>

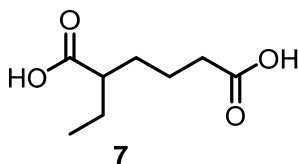

### **2-Ethylhexanedioic acid 7**

This compound was prepared according to the general procedure B for the preparation of  $\alpha$ -substituted hexanedioic acids. 85% yield, (0.89 g, 5.1 mmol, white solid).

$^1\text{H}$  NMR (600 MHz,  $\text{CDCl}_3$ )  $\delta$  2.44 – 2.29 (m, 3H), 1.86 – 1.38 (m, 6H), 0.95 (t,  $J = 7.4$  Hz, 3H).

$^{13}\text{C}$  NMR (151 MHz,  $\text{CDCl}_3$ )  $\delta$  182.5, 179.8, 47.0, 34.1, 31.1, 25.3, 22.7, 11.8.

HRMS (ESI-TOF) Calculated for  $\text{C}_8\text{H}_{13}\text{O}_4$   $[\text{M}-\text{H}]^-$ : 173.0814, found 173.0810.

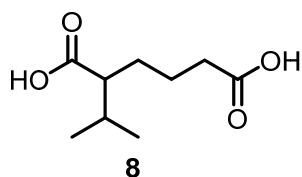

### 2-Isopropylhexanedioic acid **8**

This compound was prepared according to the general procedure A for the preparation of  $\alpha$ -substituted hexanedioic acids.

Elution condition: (20% EA/hexanes + 1% AcOH to 50% EA/hexanes + 1% AcOH, gradient elution)

Isolated yield: 42% over 2 steps (791 mg, 4.2 mmol, colourless oil)

$^1\text{H}$  NMR (600 MHz, DMSO)  $\delta$  12.03 (s, 1H), 2.28 – 2.12 (m, 1H), 1.97 (td,  $J$  = 8.2, 4.8 Hz, 0H), 1.78 – 1.69 (m,  $J$  = 6.8 Hz, 1H), 1.52 – 1.33 (m, 2H), 0.87 (dd,  $J$  = 6.8, 4.2 Hz, 3H).

$^{13}\text{C}$  NMR (151 MHz, DMSO)  $\delta$  176.3, 174.3, 51.9, 33.6, 29.9, 28.5, 22.9, 20.4, 19.9.

HRMS (ESI-TOF) Calculated for  $\text{C}_9\text{H}_{15}\text{O}_4$   $[\text{M}-\text{H}]^-$ : 187.0970, Found: 187.0978.

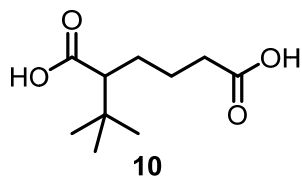

### 2-(*tert*-Butyl)hexanedioic acid **10**

This compound was prepared according to the general procedure A for the preparation of  $\alpha$ -substituted hexanedioic acids.

Elution condition: (20% EA/hexanes + 1% AcOH to 50% EA/hexanes + 1% AcOH, gradient elution)

Isolated yield: 35% over 2 steps (710 mg, 3.5 mmol, colourless oil)

$^1\text{H}$  NMR (500 MHz, DMSO)  $\delta$  12.00 (s, 2H), 2.36 – 2.09 (m, 2H), 1.99 (dd,  $J$  = 11.3, 2.5 Hz, 1H), 1.53 – 1.39 (m, 3H), 1.36 (ddd,  $J$  = 13.1, 10.6, 5.0 Hz, 1H), 0.90 (s, 9H).

$^{13}\text{C}$  NMR (126 MHz, DMSO)  $\delta$  176.1, 174.3, 55.5, 33.6, 32.1, 27.5, 26.6, 23.6.

HRMS (ESI-TOF) Calculated for  $\text{C}_{10}\text{H}_{17}\text{O}_4$   $[\text{M}-\text{H}]^-$ : 201.1127, Found: 201.1124.

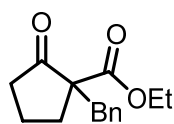

**SS2**

### Ethyl 1-benzyl-2-oxocyclopentane-1-carboxylate SS2

This compound was prepared according to the general procedure B for the preparation of  $\alpha$ -substituted hexanedioic acids by the reaction With BnBr. 95% yield, (2.34 g, 7.6 mmol, colorless oil).

$^1\text{H}$  NMR (600 MHz,  $\text{CDCl}_3$ )  $\delta$  7.29 – 7.19 (m, 3H), 7.17 – 7.12 (m, 2H), 4.22 – 4.15 (m, 2H), 3.20 (dd,  $J = 13.8, 1.4$  Hz, 1H), 3.13 (dd,  $J = 13.9, 1.5$  Hz, 1H), 2.45 – 2.40 (m, 1H), 2.40 – 2.33 (m, 1H), 2.09 – 1.84 (m, 3H), 1.65 – 1.57 (m, 1H), 1.29 – 1.23 (m, 3H).

$^{13}\text{C}$  NMR (151 MHz,  $\text{CDCl}_3$ )  $\delta$  215.1, 171.1, 136.8, 130.3, 128.5, 127.0, 77.4, 77.2, 76.9, 61.7, 61.6, 39.1, 38.5, 31.9, 19.6, 14.2.

The data is consistent with those reported in the literature.(41)

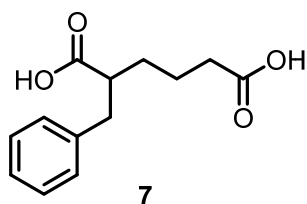

**7**

### 2-Benzylhexanedioic acid 9

This compound was prepared according to the general procedure B for the preparation of  $\alpha$ -substituted hexanedioic acids. 90% yield, (1.28 g, 5.4 mmol, white solid).

$^1\text{H}$  NMR (600 MHz,  $\text{CDCl}_3$ )  $\delta$  7.30 – 7.16 (m, 5H), 3.01 (dd,  $J = 13.6, 7.4$  Hz, 1H), 2.78 – 2.65 (m, 2H), 2.40 – 2.26 (m, 2H), 1.78 – 1.61 (m, 3H), 1.59 – 1.51 (m, 1H).

$^{13}\text{C}$  NMR (151 MHz,  $\text{CDCl}_3$ )  $\delta$  181.5, 179.5, 138.9, 129.0, 128.6, 126.7, 47.2, 38.1, 33.9, 31.0, 22.5.

HRMS (ESI-TOF) Calculated for  $\text{C}_{13}\text{H}_{16}\text{O}_4\text{Na}$   $[\text{M}+\text{Na}]^+$ : 259.0946, Found: 259.0947.

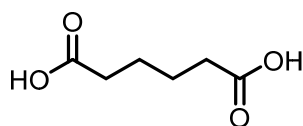

**1**

### Adipic acid/hexane-1,6-dioic acid 1

This compound is commercially available.

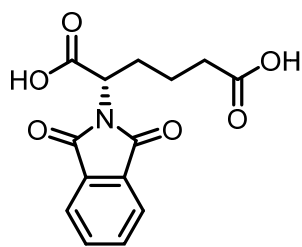

11

### (*S*)-2-(1,3-dioxisoindolin-2-yl)hexanedioic acid 11

This compound was synthesized from commercially available L-homoglutamic acid using the following general procedure(42). Amino acid (5.0 mmol, 1.0 equiv), phthalic anhydride (5.0 mmol, 1.0 equiv), and triethylamine (0.5 mmol, 0.1 equiv) were dissolved in toluene (30 mL) in a dried round bottom flask equipped with a stir bar and a reflux condenser. The reaction mixture was heated to reflux for 4 h. The reaction mixture was cooled to room temperature and concentrated under vacuum. The residue was dissolved in EtOAc, transferred to a separatory funnel, and washed with 1 M HCl. The organic layer was dried with MgSO<sub>4</sub>, filtered through Celite, and concentrated to give the desired product quantitatively as a white powder (1.46 g, 5.0 mmol).

<sup>1</sup>H NMR (500 MHz, DMSO) δ 8.14 – 7.74 (m, 4H), 4.74 (dd, *J* = 10.0, 5.4 Hz, 1H), 2.21 (hept, *J* = 8.0 Hz, 2H), 2.09 (ddt, *J* = 14.6, 12.6, 7.4 Hz, 2H), 1.46 (p, *J* = 7.5 Hz, 2H).

<sup>13</sup>C NMR (126 MHz, DMSO) δ 174.1, 170.4, 167.4, 134.9, 131.1, 123.4, 51.4, 32.9, 27.5, 21.4.

HRMS (ESI-TOF) Calculated for C<sub>14</sub>H<sub>14</sub>NO<sub>6</sub> [M+H]<sup>+</sup>: 292.0821, Found: 292.0821.

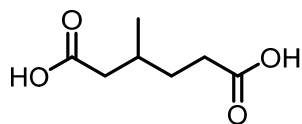

14

### 3-Methylhexanedioic acid 14

This compound is commercially available.

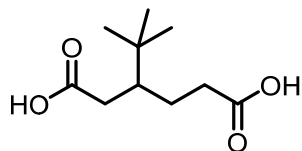

15

### 3-(*tert*-Butyl)hexanedioic acid 15

This compound is commercially available.

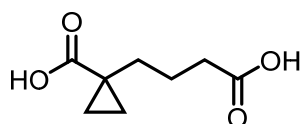

16

### 1-(3-Carboxypropyl)cyclopropane-1-carboxylic acid 16

This compound was synthesized using the following procedure:

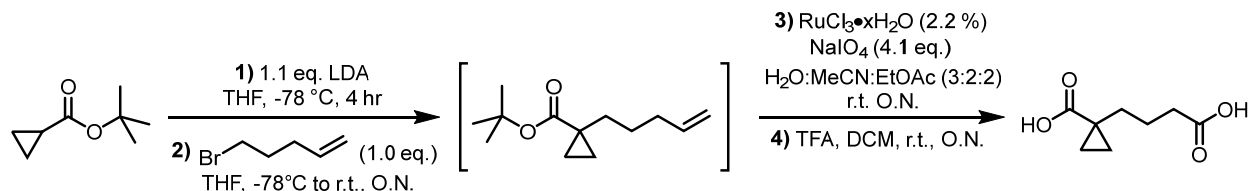

A solution of *n*BuLi (2.5M in hexanes, 1.4 mL, 3.6 mmol, 1.2 eq.) was added to a solution of DIPA (0.46 mL, 3.3 mmol, 1.1 eq.) in THF (30 mL) at 0 °C. The resultant solution was stirred at 0 °C for 30 minutes then cooled to -78 °C. *tert*-Butyl cyclopropanecarboxylate (427 mg, 3.0 mmol, 1.0 eq.) was dissolved in THF (2.0 mL) and added dropwise to the LDA solution at -78 °C, in which the solution was stirred at -78 °C for 4 hours. A solution of 5-bromo-1-pentene (0.36 mL, 3.0 mmol, 1.0 eq.) in THF (2.0 mL) was then added. The reaction was warmed to room temperature and stirred overnight. The completion of the reaction was confirmed by TLC analysis of the reaction mixture. The reaction was then quenched with aq. HCl (1.0 M) and extracted three times with EtOAc. The combined organic layer was dried with anhydrous MgSO<sub>4</sub>, filtered, and concentrated under vacuum. The crude product obtained was directly used for the next step without further purification.

To the crude product obtained in the previous step was added a 3:2:2 ratio of H<sub>2</sub>O, MeCN, and EtOAc (0.3 M) at room temperature, followed by RuCl<sub>3</sub>·*x*H<sub>2</sub>O (14 mg, 2.2 mol%). The reaction was stirred vigorously and NaIO<sub>4</sub> (2.7 g, 12.3 mmol, 4.1 eq.) was added in portions over 1 hour. The reaction mixture was then stirred at room temperature overnight. The reaction mixture was then diluted with water and extracted with EtOAc three times. The combined organic layer was dried with anhydrous MgSO<sub>4</sub>, filtered, and concentrated under vacuum. To the crude product was added aq. NaOH (10.0 mL, 1.0 M) and quickly extracted with EtOAc three times. The aqueous layer was acidified with aq. HCl (6.0 M) to pH ~2 and extracted with EtOAc three times. The combined organic layer was dried with anhydrous MgSO<sub>4</sub>, filtered, and concentrated. The residue was dissolved in DCM (10 mL) and trifluoroacetic acid (0.23 mL, 3.0 mmol, 1.0 eq.) was added and stirred at room temperature overnight. Evaporation of the volatiles provided the desired product as a white solid in 20% yield over 4 steps (103.0 mg, 0.6 mmol).

<sup>1</sup>H NMR (500 MHz, DMSO) δ 2.17 (t, *J* = 7.5 Hz, 2H), 1.71 – 1.57 (m, 2H), 1.54 – 1.39 (m, 2H), 1.15 – 0.94 (m, 2H), 0.71 – 0.56 (m, 2H).

<sup>13</sup>C NMR (126 MHz, DMSO) δ 176.2, 174.3, 33.7, 32.8, 22.9, 22.6, 14.7.

HRMS (ESI-TOF) Calculated for C<sub>8</sub>H<sub>11</sub>O<sub>4</sub> [M-H]<sup>-</sup>: 171.0657, Found: 171.0661.



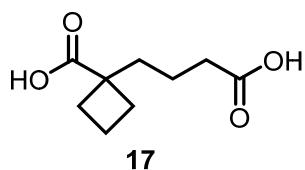

### 1-(3-Carboxypropyl)cyclobutane-1-carboxylic acid **17**

This compound was prepared according to the general procedure A for the preparation of  $\alpha$ -substituted hexanedioic acids.

Elution condition: (20% EA/hexanes + 1% AcOH to 50% EA/hexanes + 1% AcOH, gradient elution)

Isolated yield: 41% over 2 steps (0.76 g, 4.1 mmol, white solid)

$^1\text{H}$  NMR (500 MHz, DMSO)  $\delta$  12.05 (s, 2H), 2.32 – 2.23 (m, 2H), 2.19 (t,  $J$  = 7.4 Hz, 2H), 1.87 – 1.71 (m, 4H), 1.71 – 1.62 (m, 2H), 1.41 – 1.30 (m, 2H).

$^{13}\text{C}$  NMR (126 MHz, DMSO)  $\delta$  177.8, 174.3, 46.8, 36.9, 33.7, 29.5, 20.2, 15.0.

HRMS (ESI-TOF) Calculated for  $\text{C}_9\text{H}_{13}\text{O}_4$   $[\text{M}-\text{H}]^-$ : 185.0814, Found: 185.0818.

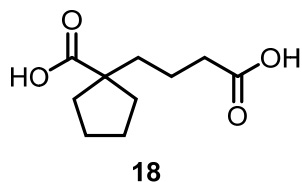

### 1-(3-Carboxypropyl)cyclopentane-1-carboxylic acid **18**

This compound was prepared according to the general procedure A for the preparation of  $\alpha$ -substituted hexanedioic acids.

Elution condition: (20% EA/hexanes + 1% AcOH to 50% EA/hexanes + 1% AcOH, gradient elution)

Isolated yield: 55% over 2 steps (1.10 g, 5.5 mmol, white solid)

$^1\text{H}$  NMR (500 MHz, DMSO)  $\delta$  12.02 (s, 2H), 2.17 (t,  $J$  = 7.3 Hz, 2H), 2.00 (dt,  $J$  = 12.0, 6.2 Hz, 2H), 1.69 – 1.45 (m, 6H), 1.45 – 1.20 (m, 4H).

$^{13}\text{C}$  NMR (126 MHz, DMSO)  $\delta$  178.5, 174.2, 53.1, 38.1, 35.3, 34.0, 24.6, 21.3.

HRMS (ESI-TOF) Calculated for  $\text{C}_{10}\text{H}_{15}\text{O}_4$   $[\text{M}-\text{H}]^-$ : 199.0970, Found: 199.0978.

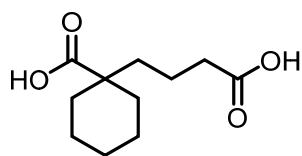

19

### 1-(3-Carboxypropyl)cyclohexane-1-carboxylic acid 19

This compound was prepared according to the general procedure A for the preparation of  $\alpha$ -substituted hexanedioic acids.

Elution condition: (20% EA/hexanes + 1% AcOH to 50% EA/hexanes + 1% AcOH, gradient elution)

Isolated yield: 56% over 2 steps (1.20 g, 5.6 mmol, white solid)

$^1\text{H}$  NMR (500 MHz, DMSO)  $\delta$  12.04 (s, 2H), 2.15 (dq,  $J = 4.4, 2.3$  Hz, 2H), 1.92 (d,  $J = 12.2$  Hz, 2H), 1.61 – 1.47 (m, 3H), 1.40 (d,  $J = 3.7$  Hz, 4H), 1.27 (dt,  $J = 14.5, 10.3$  Hz, 2H), 1.20 (td,  $J = 9.5, 3.5$  Hz, 1H), 1.13 (td,  $J = 12.1, 3.1$  Hz, 2H).

$^{13}\text{C}$  NMR (126 MHz, DMSO)  $\delta$  177.4, 174.2, 45.8, 39.3, 34.0, 33.6, 25.5, 22.9, 19.4.

HRMS (ESI-TOF) Calculated for  $\text{C}_{11}\text{H}_{17}\text{O}_4$  [M-H] $^-$ : 213.1127, Found: 213.1125.

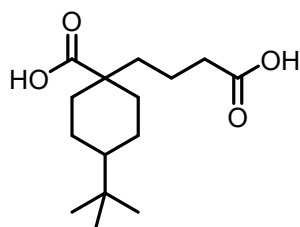

20

### 4-(*tert*-Butyl)-1-(3-carboxypropyl)cyclohexane-1-carboxylic acid 20

This compound was prepared according to the general procedure A for the preparation of  $\alpha$ -substituted hexanedioic acids.

Elution condition: (10% EA/hexanes + 1% AcOH to 50% EA + 1% AcOH, gradient elution)

Isolated yield: 56% over 2 steps (1.51 g, 5.6 mmol, white solid, d.r. = 2.7:1)

$^1\text{H}$  NMR (500 MHz, DMSO)  $\delta$  12.03 (s, 2H), 2.21 – 2.07 (m, 3.5H), 1.79 – 1.71 (m, 0.5H), 1.64 – 1.48 (m, 2.5H), 1.45 – 1.31 (m, 4H), 1.16 – 1.06 (m, 0.6H), 1.06 – 0.91 (m, 4H), 0.85 – 0.79 (m, 9H).

$^{13}\text{C}$  NMR (126 MHz, DMSO)  $\delta$  178.8, 177.1, 174.3, 174.2, 47.2, 47.0, 45.9, 43.8, 40.9, 34.3, 34.0, 34.0, 32.1, 32.1, 30.9, 27.3, 24.2, 21.5, 19.8, 19.5.

HRMS (ESI-TOF) Calculated for  $\text{C}_{15}\text{H}_{25}\text{O}_4$  [M-H] $^-$ : 269.1753, Found: 269.1748.

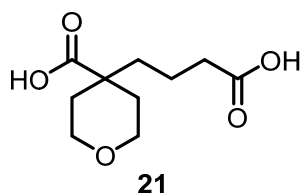

#### 4-(3-Carboxypropyl)tetrahydro-2H-pyran-4-carboxylic acid **21**

This compound was prepared according to the general procedure A for the preparation of  $\alpha$ -substituted hexanedioic acids.

Elution condition: (40% EA/hexanes + 1% AcOH to 100% EA + 1% AcOH, gradient elution)

Isolated yield: 70% over 2 steps (1.51 g, 7.0 mmol, white solid)

$^1\text{H}$  NMR (500 MHz, DMSO)  $\delta$  12.23 (s, 2H), 3.70 (dt,  $J = 11.8, 3.8$  Hz, 2H), 3.29 (dd,  $J = 11.4, 2.3$  Hz, 2H), 2.17 (t,  $J = 6.9$  Hz, 2H), 1.90 (d,  $J = 13.2$  Hz, 2H), 1.49 – 1.43 (m, 2H), 1.43 – 1.37 (m, 2H), 1.37 – 1.31 (m, 2H).

$^{13}\text{C}$  NMR (126 MHz, DMSO)  $\delta$  176.7, 174.2, 64.6, 43.8, 39.2, 33.7, 19.1.

HRMS (ESI-TOF) Calculated for  $\text{C}_{10}\text{H}_{15}\text{O}_5$   $[\text{M}-\text{H}]^-$ : 215.0919, Found: 215.0914.

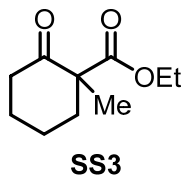

#### Ethyl 1-methyl-2-oxocyclohexane-1-carboxylate **SS3**

This compound was prepared according to the general procedure B for the preparation of  $\alpha$ -substituted heptanedioic acids with the reaction of MeI and ethyl 2-oxocyclohexane-1-carboxylate. 73% yield, (1.1 g, 6.0 mmol, colorless oil).

$^1\text{H}$  NMR (600 MHz,  $\text{CDCl}_3$ )  $\delta$  4.22 – 4.14 (m, 2H), 2.54 – 2.41 (m, 3H), 2.06 – 1.97 (m, 1H), 1.78 – 1.57 (m, 4H), 1.50 – 1.41 (m, 1H), 1.28 (s, 3H), 1.25 (t,  $J = 7.1$  Hz, 3H).

$^{13}\text{C}$  NMR (151 MHz,  $\text{CDCl}_3$ )  $\delta$  208.5, 173.2, 61.4, 57.3, 40.8, 38.4, 27.7, 22.8, 21.4, 14.2.

The data is consistent with those reported in the literature.<sup>(40)</sup>

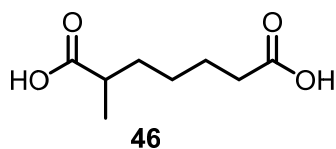

### 2-Methylheptanedioic acid **46**

This compound was prepared according to the general procedure B for the preparation of  $\alpha$ -substituted heptanedioic acids. 75% yield, (0.78 g, 4.5 mmol, white solid).

$^1\text{H}$  NMR (500 MHz, DMSO)  $\delta$  2.29 (h,  $J = 6.9$  Hz, 1H), 2.19 (t,  $J = 7.3$  Hz, 2H), 1.57 – 1.50 (m, 1H), 1.50 – 1.41 (m, 2H), 1.33 (dq,  $J = 15.7, 6.8$  Hz, 1H), 1.25 (qd,  $J = 7.6, 3.7$  Hz, 2H), 1.03 (d,  $J = 6.9$  Hz, 3H).

$^{13}\text{C}$  NMR (126 MHz, DMSO)  $\delta$  177.4, 174.4, 38.6, 33.6, 33.0, 26.3, 24.4, 17.0.

HRMS (ESI-TOF) Calculated for  $\text{C}_8\text{H}_{13}\text{O}_4$ ,  $[\text{M}-\text{H}]^-$ : 173.0814, found: 173.0811.

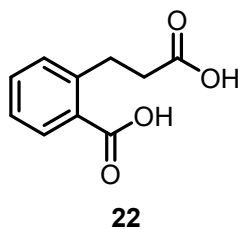

### 2-(2-Carboxyethyl)benzoic acid **22**

This compound is commercially available.

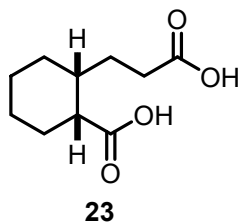

### (1*R*\*,2*R*\*)-2-(2-Carboxyethyl)cyclohexane-1-carboxylic acid **23**

This compound was prepared according to the following procedure.<sup>(43)</sup>

The compound **20** (0.2 g, 1.03 mmol) was dissolved in glacial acetic acid (10.0 mL) and  $\text{PtO}_2$  (40.0 mg) was added. The reaction vessel was purged with  $\text{H}_2$  and the hydrogenation reaction was carried out at room temperature with a balloon of  $\text{H}_2$  and stirred for 3 days. Analysis of an aliquot of the reaction mixture at this point suggested completion of reaction. The reaction mixture was filtered with a plug of Celite® and the filtrate was evaporated to dryness to give the desired compound as a white solid in 97% yield (0.2 g, 1.00 mmol).

$^1\text{H}$  NMR (500 MHz,  $\text{CDCl}_3$ )  $\delta$  2.62 (dt,  $J = 8.1, 4.1$  Hz, 1H), 2.41 (ddd,  $J = 15.8, 10.0, 5.8$  Hz, 1H), 2.32 (ddd,  $J = 16.0, 9.7, 6.4$  Hz, 1H), 1.98 – 1.85 (m, 1H), 1.83 – 1.73 (m, 2H), 1.73 – 1.61 (m, 4H), 1.60 – 1.43 (m, 2H), 1.41 – 1.30 (m, 2H).

$^{13}\text{C}$  NMR (126 MHz,  $\text{CDCl}_3$ )  $\delta$  181.6, 180.4, 45.2, 36.7, 32.6, 28.1, 25.3, 23.9, 22.4.

HRMS (ESI-TOF) Calculated for  $\text{C}_{10}\text{H}_{15}\text{O}_4$   $[\text{M}-\text{H}]^-$ : 199.0970, Found: 199.0968.

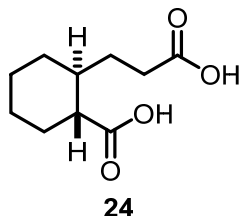

### **(1*R*\*,2*S*\*)-2-(2-Carboxyethyl)cyclohexane-1-carboxylic acid 24**

This compound was prepared according to the following procedure.<sup>(43)</sup>

The compound **21** (0.1 g, 0.50 mmol) was suspended in conc. HCl (1.0 mL) in a sealed tube and stirred at 180 °C overnight. The reaction mixture was diluted with H<sub>2</sub>O and extracted with EtOAc three times. The combined organic layer was dried with anhydrous MgSO<sub>4</sub>, filtered, and evaporated to dryness to give the desired compound as an off-white solid in 76% yield (75.0 mg, 0.38 mmol).

$^1\text{H}$  NMR (500 MHz,  $\text{CDCl}_3$ )  $\delta$  2.48 (ddd,  $J = 16.2, 10.8, 5.5$  Hz, 1H), 2.28 (ddd,  $J = 16.1, 10.5, 5.7$  Hz, 1H), 2.08 (td,  $J = 11.5, 3.5$  Hz, 1H), 1.96 (d,  $J = 13.7$  Hz, 1H), 1.89 – 1.79 (m, 2H), 1.79 – 1.72 (m, 2H), 1.66 – 1.56 (m, 1H), 1.53 – 1.41 (m, 2H), 1.30 – 1.19 (m, 2H), 0.92 (td,  $J = 12.3, 8.9$  Hz, 1H).

$^{13}\text{C}$  NMR (126 MHz,  $\text{CDCl}_3$ )  $\delta$  182.9, 180.6, 49.9, 38.3, 31.5, 30.4, 30.1, 29.8, 25.6, 25.4.

HRMS (ESI-TOF) Calculated for  $\text{C}_{10}\text{H}_{15}\text{O}_4$   $[\text{M}-\text{H}]^-$ : 199.0970, Found: 199.0974.

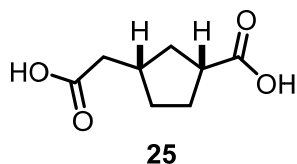

### **(1*R*\*,3*S*\*)-3-(Carboxymethyl)cyclopentane-1-carboxylic acid 25**

This compound was prepared according to the following procedure.

Bicyclo[3.2.1]oct-2-ene (1.0 g, 9.24 mmol) was dissolved in a 3:2:2 ratio of H<sub>2</sub>O/MeCN/EtOAc (31 mL) at room temperature. RuCl<sub>3</sub>·xH<sub>2</sub>O (42.0 mg, 0.20 mmol) was added, followed by portionwise addition of NaIO<sub>4</sub> (8.1 g, 38.0 mmol) over 1 hour. The reaction mixture was stirred vigorously at room temperature overnight. The reaction mixture was diluted with H<sub>2</sub>O and extracted with EtOAc three times. The combined organic layer was dried with anhydrous MgSO<sub>4</sub>, filtered, and evaporated to dryness to give the desired compound as a pale grey solid in 83% yield (1.35 g, 7.6 mmol).

$^1\text{H}$  NMR (600 MHz, DMSO)  $\delta$  12.01 (s, 2H), 2.69 (dt,  $J = 16.4, 8.1$  Hz, 1H), 2.24 (dd,  $J = 7.3, 2.0$  Hz, 2H), 2.19 – 2.10 (m, 1H), 2.03 (dt,  $J = 12.5, 7.5$  Hz, 1H), 1.83 – 1.71 (m, 3H), 1.31 (dt,  $J = 12.5, 9.5$  Hz, 1H), 1.24 – 1.18 (m, 1H).

$^{13}\text{C}$  NMR (151 MHz, DMSO)  $\delta$  177.1, 173.9, 42.9, 39.4, 36.2, 36.0, 31.4, 28.3.

HRMS (ESI-TOF) Calculated for  $\text{C}_8\text{H}_{11}\text{O}_4$   $[\text{M}-\text{H}]^-$ : 171.0657, Found: 171.0657.

### General method for the preparation of substituted benzoic acid substrates

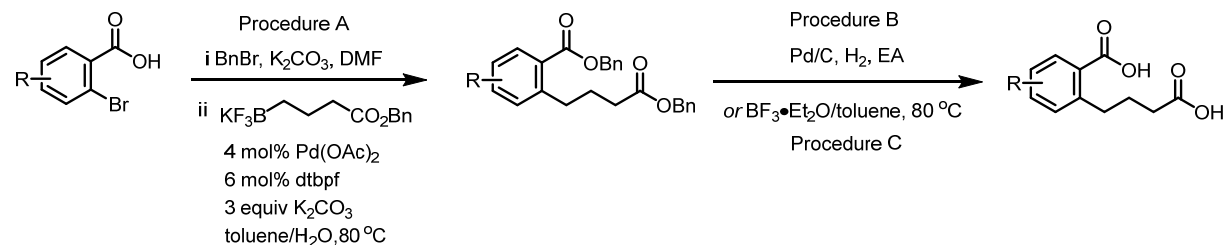

#### Procedure A

To a solution of 2-bromobenzoic acid (14.0 mmol) in DMF (30 mL) were added  $\text{K}_2\text{CO}_3$  (21.0 mmol) and benzylbromide (14.3 mmol), and the mixture was stirred at room temperature for 12 h. The mixture was partitioned between EtOAc and  $\text{H}_2\text{O}$ , and extracted with EtOAc, and the organic layer was washed with  $\text{H}_2\text{O}$  and brine, dried over  $\text{MgSO}_4$ , filtered, and concentrated in vacuo to give benzyl 2-bromobenzoate quantitatively.

A suspension of benzyl 2-bromobenzoate (2 mmol), benzyl 4-trifluoroboratebutanoate potassium salt (3 mmol),  $\text{K}_2\text{CO}_3$  (829 mg, 6 mmol),  $\text{Pd}(\text{OAc})_2$  (18 mg, 0.08 mmol), 1,1'-bis(di-tert-butylphosphino)ferrocene (dtbpf, 56 mg, 0.12 mmol) in toluene (10 mL), was degassed with  $\text{N}_2$  during 5 min and distilled water (2 mL) was added. The mixture was placed into a pre-heated oil bath at 80 °C during 18 h and controlled by TLC until the starting material was consumed. Then, the system was cooled to room temperature, diluted with  $\text{H}_2\text{O}$  (10 mL) and extracted with  $\text{Et}_2\text{O}$  ( $3 \times 30$  mL). The organic phase was washed with 1 M HCl (10 mL) and brine (20 mL), dried over  $\text{MgSO}_4$  and filtered through a cotton pad. The volatiles were removed under vacuum and the crude material was purified by column chromatography affording benzyl 2-(4-(benzyloxy)-4-oxobutyl)benzoate.

#### Preparation of benzyl 4-trifluoroboratebutanoate potassium salt

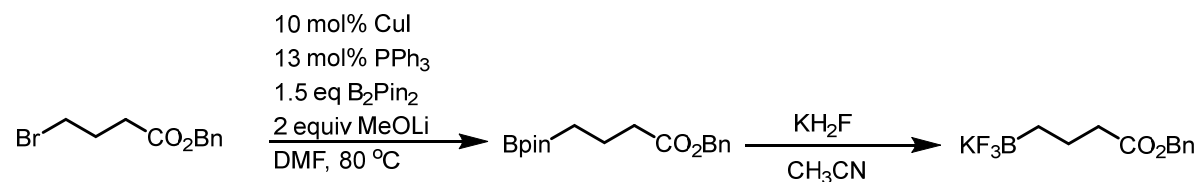

In air, CuI (228 mg, 1.2 mmol),  $\text{PPh}_3$  (409 mg, 1.56 mmol), LiOMe (912 mg, 24 mmol), and bis(pinacolato)diboron (4.57 g, 18 mmol) were added to a 50 ml round-bottom flask equipped with a stir bar. The vessel was evacuated and filled with  $\text{N}_2$  (three cycles). DMF (15 mL), the benzyl 4-

bromobutanoate (12 mmol, 3.07 g) were added in turn by syringe. The resulting reaction mixture was stirred vigorously at room temperature for 18 h. The reaction mixture was then diluted with EtOAc, filtered through silica gel with copious washings (EtOAc), concentrated, and purified by column chromatography, affording benzyl 4-(4,4,5,5-tetramethyl-1,3,2-dioxaborolan-2-yl)butanoate (2.9 g, 79% yield) as a colorless oil. <sup>1</sup>H NMR (600 MHz, CDCl<sub>3</sub>) δ 7.39 – 7.28 (m, 5H), 5.11 (s, 2H), 2.41 – 2.35 (m, 2H), 1.81 – 1.73 (m, 2H), 1.23 (s, 12H), 0.82 (t, *J* = 7.9 Hz, 2H). <sup>13</sup>C NMR (151 MHz, CDCl<sub>3</sub>) δ 173.6, 136.3, 128.6, 128.3, 128.2, 83.2, 66.1, 36.7, 24.9, 19.7. HRMS (ESI-TOF) Calculated for C<sub>25</sub>H<sub>25</sub>O<sub>4</sub> [M+H]<sup>+</sup>: 304.1960, found: 304.1963.

To a stirred solution of benzyl 4-(4,4,5,5-tetramethyl-1,3,2-dioxaborolan-2-yl)butanoate (1.2 g, 4 mmol) in CH<sub>3</sub>CN (10 mL) was added KHF<sub>2</sub> (936 mg, 12 mmol) Then the mixture was added with water (3 mL) dropwise at ambient temperature and the reaction mixture was stirred for 4 h. Then the solvent was removed under vacuum and dried. The resulting mixture was purified by dissolving in hot CH<sub>3</sub>CN, and precipitation by adding Et<sub>2</sub>O. Collect the white solid washed with Et<sub>2</sub>O to afford benzyl 4-trifluoroboratebutanoate potassium salt (795 mg, 70% yield) as a white solid. <sup>1</sup>H NMR (600 MHz, DMSO) δ 7.60 – 7.16 (m, 5H), 5.04 (s, 2H), 2.33 – 2.03 (m, 2H), 1.83 – 1.32 (m, 2H), 0.40 – -0.18 (m, 2H). <sup>13</sup>C NMR (151 MHz, DMSO) δ 173.8, 136.6, 128.4, 127.9, 127.8, 73.6, 64.8, 37.3, 25.0, 21.7 (q, *J* = 2.7 Hz). HRMS (ESI-TOF) Calculated for C<sub>11</sub>H<sub>13</sub>BF<sub>3</sub>O<sub>2</sub> [M-H]<sup>-</sup>: 244.0997, found: 244.0992.

### Procedure B

A solution of benzyl 2-(4-(benzyloxy)-4-oxobutyl)benzoate (1 mmol) in EtOAc (10 mL) was treated with 10% Pd/C (100 mg) and the mixture was stirred for overnight at room temperature under H<sub>2</sub>. The mixture was passed through celite and the filtrate was concentrated under reduced pressure to give 2-(3-carboxypropyl)benzoic acid.

### Procedure C

A solution of benzyl 2-(4-(benzyloxy)-4-oxobutyl)benzoate (1 mmol) in toluene (10 mL) was added with Boron trifluoride diethyl etherate (2.4 mmol) and the mixture was placed into a pre-heated oil bath at 80 °C for 2 h. The mixture was concentrated under reduced pressure and purified by column chromatography (EtOAc/Hexanes/3% AcOH) to give 2-(3-carboxypropyl)benzoic acid.

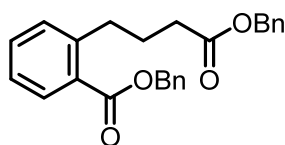

**S32**

### Benzyl 2-(4-(benzyloxy)-4-oxobutyl)benzoate S32

**S32** was prepared by Procedure A, 97% yield for two steps, (0.75 g, 1.94 mmol, yellow oil).

<sup>1</sup>H NMR (600 MHz, CDCl<sub>3</sub>) δ 7.94 – 7.90 (m, 1H), 7.44 – 7.31 (m, 11H), 7.26 – 7.19 (m, 2H), 5.32 (s, 2H), 5.11 (s, 2H), 3.00 – 2.95 (m, 2H), 2.34 (t, *J* = 7.5 Hz, 2H), 1.97 – 1.89 (m, 2H).

<sup>13</sup>C NMR (151 MHz, CDCl<sub>3</sub>) δ 173.4, 167.4, 143.6, 136.2, 136.1, 132.2, 131.3, 131.0, 129.5, 128.8, 128.7, 128.5, 128.4, 128.4, 128.3, 128.3, 126.3, 77.4, 77.2, 76.9, 66.8, 66.27, 34.02, 33.7, 26.8.

HRMS (ESI-TOF) Calculated for C<sub>25</sub>H<sub>25</sub>O<sub>4</sub> [M+H]<sup>+</sup>: 389.1753, Found: 389.1749.

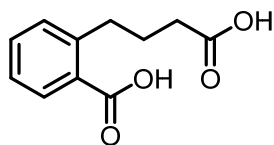

**32**

### 2-(3-Carboxypropyl)benzoic acid **32**

**32** was prepared by Procedure B, 99% yield, (0.21 g, 0.99 mmol, white solid).

<sup>1</sup>H NMR (600 MHz, CDCl<sub>3</sub>) δ 8.00 (dd, *J* = 8.1, 1.5 Hz, 1H), 7.49 (td, *J* = 7.5, 1.5 Hz, 1H), 7.33 – 7.27 (m, 2H), 3.18 – 3.12 (m, 2H), 2.43 – 2.38 (m, 2H), 2.05 – 1.98 (m, 2H).

<sup>13</sup>C NMR (151 MHz, CDCl<sub>3</sub>) δ 181.1, 174.3, 144.1, 133.0, 131.7, 131.3, 129.2, 126.4, 77.4, 77.2, 77.0, 33.4, 32.6, 27.7.

HRMS (ESI-TOF) Calculated for C<sub>11</sub>H<sub>12</sub>O<sub>4</sub>Na [M+Na]<sup>+</sup>: 231.0633, Found: 231.0640.

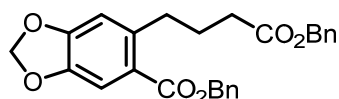

**S33**

### Benzyl 6-(4-(benzyloxy)-4-oxobutyl)benzo[d][1,3]dioxole-5-carboxylate **S33**

**S33** was prepared by Procedure A, 95% yield for two steps, (0.82 g, 1.90 mmol, yellow oil).

<sup>1</sup>H NMR (600 MHz, CDCl<sub>3</sub>) δ 7.43 – 7.32 (m, 10H), 6.66 (s, 1H), 5.98 (s, 2H), 5.28 (s, 2H), 5.11 (s, 2H), 2.97 – 2.92 (m, 2H), 2.35 (t, 2H), 1.95 – 1.87 (m, 2H).

<sup>13</sup>C NMR (151 MHz, CDCl<sub>3</sub>) δ 173.4, 166.3, 150.9, 146.0, 140.6, 136.2, 136.2, 128.7, 128.7, 128.4, 128.4, 128.3, 122.2, 111.0, 110.8, 101.8, 66.7, 66.3, 33.9, 33.9, 26.9.

HRMS (ESI-TOF) Calculated for C<sub>26</sub>H<sub>25</sub>O<sub>6</sub> [M+H]<sup>+</sup>: 433.1651, Found: 433.1646.

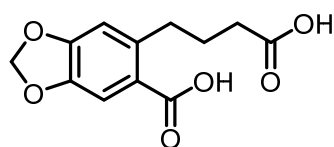

**33**

### 6-(3-Carboxypropyl)benzo[d][1,3]dioxole-5-carboxylic acid **33**

**33** was prepared by Procedure B, 99% yield, (0.25 g, 0.99 mmol, white solid).



$^1\text{H}$  NMR (600 MHz,  $\text{CD}_3\text{OD}$ )  $\delta$  7.37 (s, 1H), 6.76 (s, 1H), 6.00 (s, 2H), 3.00 – 2.95 (m, 2H), 2.31 (t,  $J = 7.6$  Hz, 2H), 1.90 – 1.82 (m, 2H).

$^{13}\text{C}$  NMR (151 MHz,  $\text{CD}_3\text{OD}$ )  $\delta$  177.4, 170.0, 152.2, 147.3, 141.6, 124.0, 111.8, 111.5, 103.1, 34.7, 34.6, 28.2.

HRMS (ESI-TOF) Calculated for  $\text{C}_{12}\text{H}_{12}\text{O}_6\text{Na}$   $[\text{M}+\text{Na}]^+$ : 275.0532, Found: 275.0530.

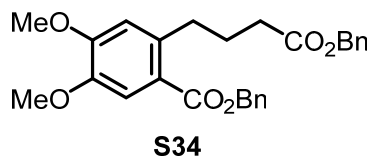

### Benzyl 2-(4-(benzyloxy)-4-oxobutyl)-4,5-dimethoxybenzoate S34

**S34** was prepared by Procedure A, 95% yield for two steps, (0.85 g, 1.90 mmol, yellow oil).

$^1\text{H}$  NMR (600 MHz,  $\text{CDCl}_3$ )  $\delta$  7.50 (s, 1H), 7.44 – 7.41 (m, 2H), 7.40 – 7.30 (m, 9H), 6.66 (s, 1H), 5.31 (s, 2H), 5.11 (s, 2H), 3.87 (s, 3H), 3.87 (s, 3H), 2.98 – 2.92 (m, 2H), 2.31 (t,  $J = 7.4$  Hz, 2H), 1.95 – 1.87 (m, 2H).

$^{13}\text{C}$  NMR (151 MHz,  $\text{CDCl}_3$ )  $\delta$  173.5, 166.8, 152.1, 146.9, 138.5, 136.3, 136.2, 128.7, 128.7, 128.4, 128.4, 128.4, 128.3, 120.8, 113.9, 113.8, 66.7, 66.3, 56.2, 56.0, 33.9, 33.8, 27.0.

HRMS (ESI-TOF) Calculated for  $\text{C}_{27}\text{H}_{29}\text{O}_6$   $[\text{M}+\text{H}]^+$ : 449.1964, Found: 449.1956.

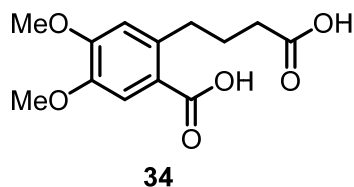

### 2-(3-Carboxypropyl)-4,5-dimethoxybenzoic acid 34

**34** was prepared by Procedure B, 99% yield, (0.27 g, 0.99 mmol, white solid).

$^1\text{H}$  NMR (600 MHz,  $\text{CD}_3\text{OD}$ )  $\delta$  7.52 (s, 1H), 6.84 (s, 1H), 3.88 (s, 3H), 3.84 (s, 3H), 3.04 – 2.98 (m, 2H), 2.32 (t,  $J = 7.4$  Hz, 2H), 1.93 – 1.85 (m, 2H).

$^{13}\text{C}$  NMR (151 MHz,  $\text{CD}_3\text{OD}$ )  $\delta$  177.8, 170.7, 153.5, 148.1, 139.9, 122.7, 115.7, 115.2, 34.75, 34.2, 28.2.

HRMS (ESI-TOF) Calculated for  $\text{C}_{13}\text{H}_{15}\text{O}_6$   $[\text{M}-\text{H}]^-$ : 267.0869, Found: 267.0858.

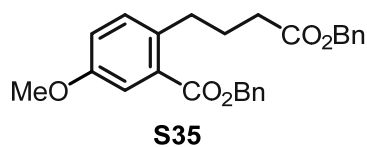

### Benzyl 2-(4-(benzyloxy)-4-oxobutyl)-4-methoxybenzoate S35

**S35** was prepared by Procedure A, 74% yield for two steps, (0.62 g, 1.48 mmol, yellow oil).

$^1\text{H NMR}$  (600 MHz,  $\text{CDCl}_3$ )  $\delta$  7.47 – 7.41 (m, 3H), 7.40 – 7.30 (m, 8H), 7.12 (d,  $J = 8.5$  Hz, 1H), 6.97 (dd,  $J = 8.4, 2.9$  Hz, 1H), 5.33 (s, 2H), 5.11 (s, 2H), 3.80 (s, 3H), 2.93 – 2.87 (m, 2H), 2.34 – 2.28 (m, 2H), 1.94 – 1.86 (m, 2H).

$^{13}\text{C NMR}$  (151 MHz,  $\text{CDCl}_3$ )  $\delta$  173.5, 167.2, 157.7, 136.2, 136.0, 135.6, 132.4, 130.3, 128.8, 128.7, 128.5, 128.4, 128.4, 128.3, 118.3, 115.8, 115.8, 66.9, 66.2, 55.6, 33.9, 33.0, 27.0.

HRMS (ESI-TOF) Calculated for  $\text{C}_{26}\text{H}_{27}\text{O}_5$   $[\text{M}+\text{H}]^+$ : 419.1858, Found: 419.1860.

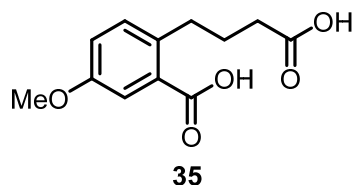

### 2-(3-Carboxypropyl)-5-methoxybenzoic acid 35

**35** was prepared by Procedure B, 99% yield, (0.24 g, 0.99 mmol, white solid).

$^1\text{H NMR}$  (600 MHz,  $\text{CD}_3\text{OD}$ )  $\delta$  7.41 (d,  $J = 3.0$  Hz, 1H), 7.20 (d,  $J = 8.5$  Hz, 1H), 7.03 (dd,  $J = 8.5, 3.0$  Hz, 1H), 3.80 (s, 3H), 2.97 – 2.91 (m, 2H), 2.32 – 2.27 (m, 2H), 1.90 – 1.82 (m, 2H).

$^{13}\text{C NMR}$  (151 MHz,  $\text{CD}_3\text{OD}$ )  $\delta$  177.5, 170.9, 159.2, 136.5, 133.3, 132.3, 118.8, 116.6, 55.82, 34.7, 33.8, 28.3.

HRMS (ESI-TOF) Calculated for  $\text{C}_{12}\text{H}_{13}\text{O}_5$   $[\text{M}-\text{H}]^-$ : 237.0763, found: 237.0766.

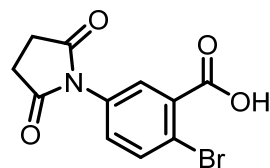

### 2-Bromo-4-(2,5-dioxopyrrolidin-1-yl)benzoic acid SS4

The synthesis of 2-bromo-4-(2,5-dioxopyrrolidin-1-yl)benzoic acid **SS4**: A mixture of 864 mg (4 mmol) of 4-amino-2-bromobenzoic acid, 1 g (4 mmol) of succinic anhydride, 0.6 ml of  $\text{ClSiMe}_3$ , and 1.5 ml DMF was heated for 1.5 h on a bath at 160 – 165 °C cooled to room temperature, and diluted

with water. The precipitate was separated by filtration, washed with water, and dried in air to obtain 2-bromo-4-(2,5-dioxopyrrolidin-1-yl)benzoic acid (90% yield, 1.07 g, 3.6 mmol) as yellow solid.

$^1\text{H}$  NMR (600 MHz,  $\text{CD}_3\text{OD}$ )  $\delta$  7.85 – 7.80 (m, 2H), 7.40 (dd,  $J = 8.5, 2.6$  Hz, 1H), 2.88 (s, 4H).

$^{13}\text{C}$  NMR (151 MHz,  $\text{CD}_3\text{OD}$ )  $\delta$  178.4, 168.5, 135.8, 135.1, 131.8, 130.6, 121.6, 29.4.

HRMS (ESI-TOF) Calculated for  $\text{C}_{11}\text{H}_9\text{BrNO}_4$   $[\text{M}+\text{H}]^+$ : 297.9715, Found: 297.9716.

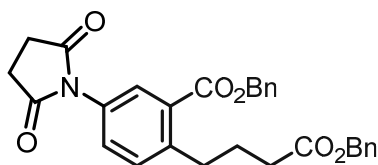

**S36**

### Benzyl 2-(4-(benzyloxy)-4-oxobutyl)-4-(2,5-dioxopyrrolidin-1-yl)benzoate S36

**S36** was prepared by Procedure A, 77% yield for two steps, (0.75 g, 1.54 mmol, yellow oil).

$^1\text{H}$  NMR (600 MHz,  $\text{CDCl}_3$ )  $\delta$  7.88 (dd,  $J = 2.0, 0.8$  Hz, 1H), 7.44 – 7.30 (m, 12H), 5.31 (s, 2H), 5.12 (s, 2H), 3.03 – 2.99 (m, 2H), 2.88 (s, 4H), 2.36 (t,  $J = 7.4$  Hz, 2H), 1.98 – 1.90 (m, 2H).

$^{13}\text{C}$  NMR (151 MHz,  $\text{CDCl}_3$ )  $\delta$  176.1, 173.3, 166.1, 144.5, 136.2, 135.8, 132.3, 130.3, 130.1, 130.1, 129.2, 128.8, 128.8, 128.6, 128.6, 128.5, 128.4, 67.1, 66.3, 34.0, 33.5, 28.5, 26.7.

HRMS (ESI-TOF) Calculated for  $\text{C}_{29}\text{H}_{28}\text{NO}_6$   $[\text{M}+\text{H}]^+$ : 486.1917, Found: 486.1910.

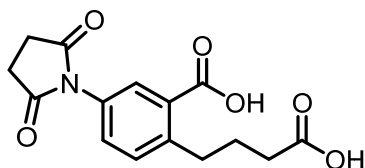

**36**

### 2-(3-Carboxypropyl)-4-(2,5-dioxopyrrolidin-1-yl)benzoic acid 36

**36** was prepared by Method B, 98% yield, (0.3 g, 0.98 mmol, white solid).

$^1\text{H}$  NMR (600 MHz,  $\text{CD}_3\text{OD}$ )  $\delta$  7.86 (d,  $J = 2.2$  Hz, 1H), 7.44 – 7.37 (m, 2H), 3.10 – 3.04 (m, 2H), 2.85 (s, 4H), 2.35 (t,  $J = 7.5$  Hz, 2H), 1.97 – 1.89 (m, 2H).

$^{13}\text{C}$  NMR (151 MHz,  $\text{CD}_3\text{OD}$ )  $\delta$  177.6, 175.9, 168.5, 143.7, 131.5, 130.7, 130.5, 129.9, 129.1, 33.2, 32.9, 28.0, 26.6.

HRMS (ESI-TOF) Calculated for  $\text{C}_{15}\text{H}_{16}\text{NO}_6$   $[\text{M}+\text{H}]^+$ : 306.0978, Found: 306.0965.

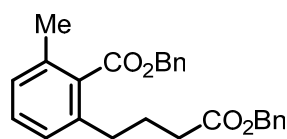

**S37**

**Benzyl 2-(4-(benzyloxy)-4-oxobutyl)-3-methylbenzoate S37**

**S37** was prepared by Procedure A, 83% yield for two steps, (0.67 g, 1.66 mmol, yellow oil).

$^1\text{H}$  NMR (600 MHz,  $\text{CDCl}_3$ )  $\delta$  7.47 – 7.41 (m, 2H), 7.40 – 7.30 (m, 8H), 7.20 (t,  $J = 7.6$  Hz, 1H), 7.05 – 6.98 (m, 2H), 5.35 (s, 2H), 5.10 (s, 2H), 2.58 – 2.53 (m, 2H), 2.27 (s, 3H), 2.24 (t,  $J = 7.5$  Hz, 2H), 1.90 – 1.82 (m, 2H)

$^{13}\text{C}$  NMR (151 MHz,  $\text{CDCl}_3$ )  $\delta$  173.2, 169.8, 138.5, 136.2, 135.6, 135.1, 133.7, 129.6, 129.1, 128.7, 128.7, 128.6, 128.4, 128.3, 128.1, 127.0, 67.1, 66.3, 33.8, 33.0, 26.5, 19.8.

HRMS (ESI-TOF) Calculated for  $\text{C}_{26}\text{H}_{27}\text{O}_4$   $[\text{M}+\text{H}]^+$ : 403.1909, Found: 403.1906.

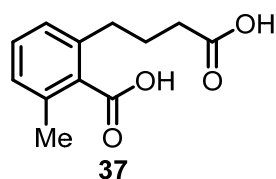

**37**

**2-(3-Carboxypropyl)-6-methylbenzoic acid 37**

**37** was prepared by Procedure B, 99% yield, (0.22 g, 0.99 mmol, white solid).

$^1\text{H}$  NMR (600 MHz,  $\text{CD}_3\text{OD}$ )  $\delta$  7.23 (t,  $J = 7.6$  Hz, 1H), 7.12 – 7.06 (m, 2H), 2.71 – 2.66 (m, 2H), 2.33 (s, 3H), 2.30 (t,  $J = 7.4$  Hz, 2H), 1.95 – 1.87 (m, 2H).

$^{13}\text{C}$  NMR (151 MHz,  $\text{CD}_3\text{OD}$ )  $\delta$  177.2, 173.8, 139.1, 136.3, 135.3, 130.1, 128.9, 127.9, 34.5, 33.9, 27.8, 19.8.

HRMS (ESI-TOF) Calculated for  $\text{C}_{12}\text{H}_{14}\text{O}_4\text{Na}$   $[\text{M}+\text{Na}]^+$ : 245.0790, Found: 245.0795.

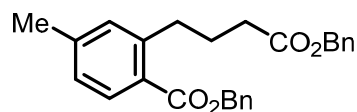

**S38**

**Benzyl 2-(4-(benzyloxy)-4-oxobutyl)-4-methylbenzoate S38**

**S38** was prepared by Procedure A, 95% yield for two steps, (0.77 g, 1.90 mmol, yellow oil).

$^1\text{H}$  NMR (600 MHz,  $\text{CDCl}_3$ )  $\delta$  7.85 (d,  $J = 8.0$  Hz, 1H), 7.45 – 7.40 (m, 2H), 7.37 (dd,  $J = 7.3$ , 1.0 Hz, 2H), 7.37 – 7.29 (m, 6H), 7.07 – 7.00 (m, 2H), 5.30 (s, 2H), 5.11 (s, 2H), 2.98 – 2.93 (m, 2H), 2.37 – 2.31 (m, 5H), 1.97 – 1.88 (m, 2H).

$^{13}\text{C}$  NMR (151 MHz,  $\text{CDCl}_3$ )  $\delta$  173.5, 167.3, 143.9, 142.8, 136.3, 132.1, 131.3, 128.7, 128.7, 128.4, 128.4, 128.3, 128.3, 127.0, 126.5, 66.6, 66.3, 34.1, 33.8, 26.9, 21.6.

HRMS (ESI-TOF) Calculated for  $\text{C}_{26}\text{H}_{27}\text{O}_4$   $[\text{M}+\text{H}]^+$ : 403.1909, Found: 403.1914.

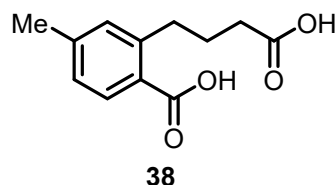

### 2-(3-Carboxypropyl)-4-methylbenzoic acid **38**

**38** was prepared by Procedure B, 99% yield, (0.22 g, 0.99 mmol, white solid).

$^1\text{H}$  NMR (600 MHz,  $\text{CD}_3\text{OD}$ )  $\delta$  7.83 – 7.78 (m, 1H), 7.13 – 7.07 (m, 2H), 3.02 – 2.96 (m, 2H), 2.37 – 2.29 (m, 5H), 1.92 – 1.84 (m, 2H).

$^{13}\text{C}$  NMR (151 MHz,  $\text{CD}_3\text{OD}$ )  $\delta$  177.4, 170.9, 145.0, 143.8, 132.9, 132.3, 128.2, 127.8, 34.7, 34.7, 28.1, 25.0, 21.4.

HRMS (ESI-TOF) Calculated for  $\text{C}_{12}\text{H}_{14}\text{O}_4\text{Na}$   $[\text{M}+\text{Na}]^+$ : 245.0790, Found: 245.0789.

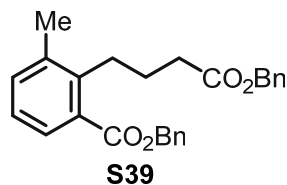

### Benzyl 2-(4-(benzyloxy)-4-oxobutyl)-3-methylbenzoate **S39**

**S39** was prepared by Procedure A, 98% yield for two steps, (0.79 g, 1.96 mmol, yellow oil).

$^1\text{H}$  NMR (600 MHz,  $\text{CDCl}_3$ )  $\delta$  7.70 – 7.65 (m, 1H), 7.45 – 7.40 (m, 2H), 7.38 – 7.30 (m, 8H), 7.29 – 7.26 (m, 1H), 7.13 (t,  $J = 7.6$  Hz, 1H), 5.31 (s, 2H), 5.12 (s, 2H), 2.93 – 2.87 (m, 2H), 2.37 (t,  $J = 7.3$  Hz, 2H), 2.33 (s, 3H), 1.90 – 1.81 (m, 2H).

$^{13}\text{C}$  NMR (151 MHz,  $\text{CDCl}_3$ )  $\delta$  173.4, 168.2, 141.3, 137.7, 136.2, 136.1, 134.1, 130.7, 128.7, 128.7, 128.5, 128.4, 128.4, 128.3, 127.9, 125.9, 125.9, 66.9, 66.3, 34.4, 29.4, 25.4, 19.8.

HRMS (ESI-TOF) Calculated for  $\text{C}_{26}\text{H}_{26}\text{O}_4\text{Na}$   $[\text{M}+\text{Na}]^+$ : 425.1729, Found: 425.1721.

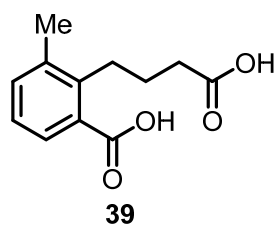

### 2-(3-Carboxypropyl)-3-methylbenzoic acid **39**

**39** was prepared by Procedure B, 99% yield, (0.22 g, 0.99 mmol, white solid).

$^1\text{H}$  NMR (600 MHz,  $\text{CD}_3\text{OD}$ )  $\delta$  7.62 (dd,  $J = 7.9, 1.4$  Hz, 1H), 7.31 (dt,  $J = 7.6, 1.4$  Hz, 1H), 7.14 (t,  $J = 7.6$  Hz, 1H), 2.99 – 2.94 (m, 2H), 2.41 – 2.35 (m, 5H), 1.88 – 1.79 (m, 2H).

$^{13}\text{C}$  NMR (151 MHz,  $\text{CD}_3\text{OD}$ )  $\delta$  177.4, 172.2, 142.0, 138.7, 134.6, 132.8, 129.1, 126.7, 35.1, 30.5, 30.4, 26.8, 19.8.

HRMS (ESI-TOF) Calculated for  $\text{C}_{12}\text{H}_{14}\text{O}_4\text{Na}$   $[\text{M}+\text{Na}]^+$ : 245.0790, Found: 245.0798.

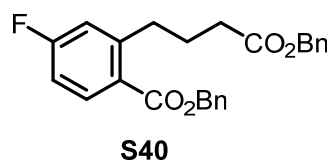

### Benzyl 2-(4-(benzyloxy)-4-oxobutyl)-4-fluorobenzoate **S40**

**S40** was prepared by Procedure A, 98% yield for two steps, (0.80 g, 1.96 mmol, yellow oil).

$^1\text{H}$  NMR (600 MHz,  $\text{CDCl}_3$ )  $\delta$  8.01 – 7.95 (m, 1H), 7.45 – 7.40 (m, 2H), 7.40 – 7.37 (m, 3H), 7.37 – 7.30 (m, 5H), 6.96 – 6.90 (m, 2H), 5.31 (s, 2H), 5.12 (s, 2H), 3.02 – 2.97 (m, 2H), 2.35 (t,  $J = 7.4$  Hz, 2H), 1.98 – 1.90 (m, 2H).

$^{13}\text{C}$  NMR (151 MHz,  $\text{CDCl}_3$ )  $\delta$  173.2, 166.3, 164.9 (d,  $J = 253.6$  Hz), 147.4 (d,  $J = 8.8$  Hz), 136.1 (d,  $J = 29.7$  Hz), 133.8 (d,  $J = 9.3$  Hz), 128.8, 128.7, 128.5, 128.4, 128.4, 125.5 (d,  $J = 2.8$  Hz), 117.9 (d,  $J = 21.4$  Hz), 113.4 (d,  $J = 21.4$  Hz), 66.9, 66.3, 33.9, 33.8, 26.5.

$^{19}\text{F}$  NMR (376 MHz,  $\text{CDCl}_3$ )  $\delta$  -109.70.

HRMS (ESI-TOF) Calculated for  $\text{C}_{25}\text{H}_{24}\text{O}_4\text{F}$   $[\text{M}+\text{H}]^+$ : 407.1659, Found: 407.1653.

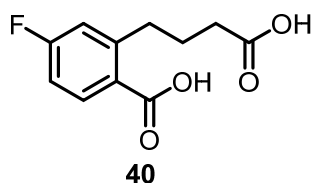

### 2-(3-Carboxypropyl)-4-fluorobenzoic acid **40**

**40** was prepared by Procedure B, 98% yield, (0.22 g, 0.98 mmol, white solid).

$^1\text{H}$  NMR (600 MHz,  $\text{CD}_3\text{OD}$ )  $\delta$  7.98 (dd,  $J = 8.7, 6.0$  Hz, 1H), 7.08 – 6.98 (m, 2H), 3.07 – 3.01 (m, 2H), 2.33 (t,  $J = 7.5$  Hz, 2H), 1.94 – 1.86 (m, 2H).

$^{13}\text{C}$  NMR (151 MHz,  $\text{CD}_3\text{OD}$ )  $\delta$  177.2, 169.8, 166.0 (d,  $J = 251.4$  Hz), 148.7 (d,  $J = 8.6$  Hz), 134.9 (d,  $J = 9.3$  Hz), 127.5 (d,  $J = 3.0$  Hz), 118.6 (d,  $J = 21.6$  Hz), 114.0 (d,  $J = 21.8$  Hz), 34.6, 34.6, 27.8.

$^{19}\text{F}$  NMR (376 MHz,  $\text{CD}_3\text{OD}$ )  $\delta$  -108.88.

HRMS (ESI-TOF) Calculated for  $\text{C}_{11}\text{H}_{11}\text{O}_4\text{FNa}$   $[\text{M}+\text{Na}]^+$ : 249.0539, Found: 249.0537.

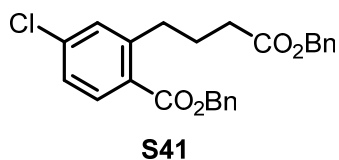

### Benzyl 2-(4-(benzyloxy)-4-oxobutyl)-4-chlorobenzoate **S41**

**S41** was prepared by Procedure A by using 2-bromo-4-chlorobenzoic acid (3 mmol) with other condition no change, 75% yield, (0.63 g, 1.50 mmol, yellow oil).

$^1\text{H}$  NMR (600 MHz,  $\text{CDCl}_3$ )  $\delta$  7.90 – 7.84 (m, 1H), 7.44 – 7.30 (m, 10H), 7.24 – 7.19 (m, 2H), 5.31 (s, 2H), 5.12 (s, 2H), 2.98 – 2.93 (m, 2H), 2.34 (t,  $J = 7.4$  Hz, 2H), 1.96 – 1.88 (m, 2H).

$^{13}\text{C}$  NMR (151 MHz,  $\text{CDCl}_3$ )  $\delta$  173.2, 166.5, 145.8, 138.4, 136.2, 131.2, 128.8, 128.7, 128.6, 128.5, 128.4, 127.8, 126.5, 67.0, 66.4, 33.9, 33.6, 26.6.

HRMS (ESI-TOF) Calculated for  $\text{C}_{25}\text{H}_{24}\text{ClO}_4$   $[\text{M}+\text{H}]^+$ : 423.1363, Found: 423.1356.

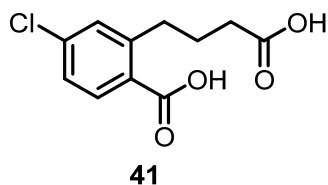

### 2-(3-Carboxypropyl)-4-chlorobenzoic acid **41**

**41** was prepared by Procedure C, 75% yield, (0.18 g, 0.75 mmol, white solid).

$^1\text{H}$  NMR (600 MHz,  $\text{CD}_3\text{OD}$ )  $\delta$  7.88 (d,  $J = 8.3$  Hz, 1H), 7.33 (d,  $J = 2.2$  Hz, 1H), 7.29 (dd,  $J = 8.4$ , 2.2 Hz, 1H), 3.04 – 2.98 (m, 2H), 2.33 (t,  $J = 7.4$  Hz, 2H), 1.93 – 1.85 (m, 2H).

$^{13}\text{C}$  NMR (151 MHz,  $\text{CD}_3\text{OD}$ )  $\delta$  177.2, 169.9, 147.1, 138.8, 133.7, 131.9, 127.3, 34.6, 34.4, 27.9.

HRMS (ESI-TOF) Calculated for  $\text{C}_{11}\text{H}_{12}\text{ClO}_4$   $[\text{M}+\text{H}]^+$ : 243.0424, Found: 243.0424.

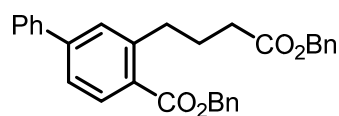

**S42**

### Benzyl 3-(4-(benzyloxy)-4-oxobutyl)-[1,1'-biphenyl]-4-carboxylate S42

To a solution of  $\text{Pd}_2(\text{dba})_3$  (183 mg, 0.2 mmol), SPhos (164 mg, 0.4 mmol) in dioxane (8 mL) was added a solution of **S41** (844 mg, 2 mmol) in dioxane (8 mL) and stirred for 10 minutes.  $\text{K}_3\text{PO}_4$  (1.27 g, 6 mmol) and  $\text{PhB}(\text{OH})_2$  were added. The resulting mixture was heated to 100 °C and stirred for 15 hours. The reaction was cooled to room temperature and diluted with ethyl acetate. Then washed with brine and the organic phase was concentrated under reduced pressure and purified by column chromatography to give the product **S42** (85% yield, 0.79 g, 1.7 mmol) as a yellow oil.

$^1\text{H}$  NMR (600 MHz,  $\text{CDCl}_3$ )  $\delta$  8.03 (d,  $J = 8.1$  Hz, 1H), 7.61 – 7.56 (m, 2H), 7.49 – 7.42 (m, 6H), 7.41 – 7.29 (m, 10H), 5.35 (s, 2H), 5.11 (s, 2H), 3.09 – 3.04 (m, 2H), 2.38 (t,  $J = 7.5$  Hz, 2H), 2.03 – 1.95 (m, 2H).

$^{13}\text{C}$  NMR (151 MHz,  $\text{CDCl}_3$ )  $\delta$  173.4, 167.1, 145.0, 144.3, 140.0, 136.2, 136.1, 131.8, 130.0, 129.0, 128.8, 128.7, 128.5, 128.4, 128.4, 128.3, 128.2, 128.1, 128.0, 127.4, 124.9, 66.8, 66.3, 34.0, 34.0, 26.9.

HRMS (ESI-TOF) Calculated for  $\text{C}_{31}\text{H}_{29}\text{O}_4$   $[\text{M}+\text{H}]^+$ : 465.2066, Found: 465.2062.

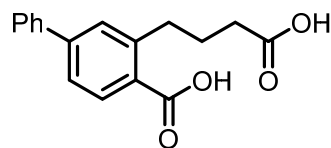

**42**

### 3-(3-Carboxypropyl)-[1,1'-biphenyl]-4-carboxylic acid 42

**42** was prepared by Procedure B, 99% yield, (0.28 g, 0.99 mmol, white solid).

$^1\text{H}$  NMR (600 MHz,  $\text{CD}_3\text{OD}$ )  $\delta$  8.01 (d,  $J = 8.1$  Hz, 1H), 7.71 – 7.66 (m, 2H), 7.58 – 7.53 (m, 2H), 7.51 – 7.45 (m, 2H), 7.42 – 7.36 (m, 1H), 3.13 (t,  $J = 7.7$  Hz, 2H), 2.38 (t,  $J = 7.4$  Hz, 2H), 2.02 – 1.94 (m, 2H).



$^{13}\text{C}$  NMR (151 MHz,  $\text{CD}_3\text{OD}$ )  $\delta$  177.6, 171.1, 145.8, 145.4, 141.3, 132.8, 130.7, 130.0, 129.1, 128.16, 125.6, 34.8, 34.7, 28.2.

HRMS (ESI-TOF) Calculated for  $\text{C}_{17}\text{H}_{15}\text{O}_4$   $[\text{M}-\text{H}]^-$ : 283.0970, Found: 283.0966.

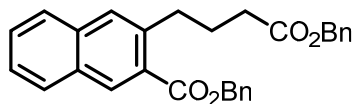

**S43**

### Benzyl 3-(4-(benzyloxy)-4-oxobutyl)-2-naphthoate S43

**S43** was prepared by Procedure A, 91% yield for two steps, (0.80 g, 1.82 mmol, yellow oil).

$^1\text{H}$  NMR (600 MHz,  $\text{CDCl}_3$ )  $\delta$  8.50 (s, 1H), 7.86 (ddq,  $J = 8.2, 1.3, 0.6$  Hz, 1H), 7.78 – 7.73 (m, 1H), 7.64 (d,  $J = 0.8$  Hz, 1H), 7.57 – 7.51 (m, 1H), 7.51 – 7.44 (m, 3H), 7.43 – 7.38 (m, 2H), 7.38 – 7.30 (m, 6H), 5.39 (s, 2H), 5.11 (s, 2H), 3.16 – 3.11 (m, 2H), 2.38 (t,  $J = 7.5$  Hz, 2H), 2.01 (tt,  $J = 9.5, 6.7$  Hz, 2H).

$^{13}\text{C}$  NMR (151 MHz,  $\text{CDCl}_3$ )  $\delta$  173.5, 167.5, 138.9, 136.2, 136.1, 135.1, 132.5, 131.3, 129.6, 128.8, 128.7, 128.6, 128.5, 128.4, 127.9, 127.2, 126.2, 67.0, 66.3, 34.0, 33.9, 26.8.

HRMS (ESI-TOF) Calculated for  $\text{C}_{29}\text{H}_{27}\text{O}_4$   $[\text{M}+\text{H}]^+$ : 439.1909, Found: 439.1908.

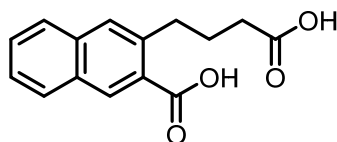

**43**

### 3-(3-Carboxypropyl)-2-naphthoic acid 43

**43** was prepared by Procedure B, 99% yield, (0.26 g, 0.99 mmol, white solid).

$^1\text{H}$  NMR (600 MHz,  $\text{CD}_3\text{OD}$ )  $\delta$  8.48 (s, 1H), 7.90 (d,  $J = 8.2$  Hz, 1H), 7.82 (d,  $J = 8.3$  Hz, 1H), 7.72 (s, 1H), 7.55 (ddd,  $J = 8.2, 6.8, 1.3$  Hz, 1H), 7.48 (ddd,  $J = 8.1, 6.8, 1.2$  Hz, 1H), 3.19 – 3.14 (m, 2H), 2.36 (t,  $J = 7.5$  Hz, 2H), 2.01 – 1.93 (m, 2H).

$^{13}\text{C}$  NMR (151 MHz,  $\text{CD}_3\text{OD}$ )  $\delta$  177.5, 171.0, 140.1, 136.4, 133.2, 132.7, 130.4, 129.7, 129.6, 129.2, 128.2, 127.2, 34.8, 34.7, 28.1.

HRMS (ESI-TOF) Calculated for  $\text{C}_{29}\text{H}_{27}\text{O}_4$   $[\text{M}+\text{H}]^+$ : 439.1909, found: 439.1908.

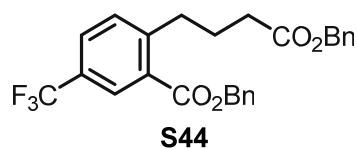

### Benzyl 2-(4-(benzyloxy)-4-oxobutyl)-5-(trifluoromethyl)benzoate S44

**S44** was prepared by Procedure A, 88% yield for two steps, (0.80 g, 1.76 mmol, yellow oil).

$^1\text{H}$  NMR (600 MHz,  $\text{CDCl}_3$ )  $\delta$  8.18 – 8.15 (m, 1H), 7.64 (ddd,  $J = 8.1, 2.2, 0.7$  Hz, 1H), 7.46 – 7.30 (m, 11H), 5.35 (s, 2H), 5.11 (s, 2H), 3.05 – 2.99 (m, 2H), 2.34 (t,  $J = 7.4$  Hz, 2H), 1.97 – 1.89 (m, 2H).

$^{13}\text{C}$  NMR (151 MHz,  $\text{CDCl}_3$ )  $\delta$  173.1, 166.2, 147.6 (q,  $J = 2.2$  Hz), 136.1, 135.6, 131.9, 130.2, 128.9 (q,  $J = 33.0$  Hz), 128.7, 128.7, 128.6, 128.6, 128.5, 128.4, 128.4, 128.0 (q,  $J = 4.1$  Hz), 123.8 (q,  $J = 272.3$  Hz), 67.4, 66.4, 33.9, 33.6, 26.6.

$^{19}\text{F}$  NMR (376 MHz,  $\text{CDCl}_3$ )  $\delta$  -65.26.

HRMS (ESI-TOF) Calculated for  $\text{C}_{26}\text{H}_{24}\text{F}_3\text{O}_4$   $[\text{M}+\text{H}]^+$ : 457.1627, Found: 457.1624.

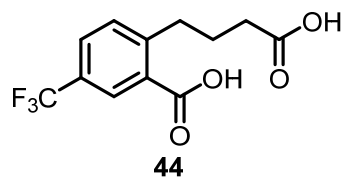

### 2-(3-Carboxypropyl)-5-(trifluoromethyl)benzoic acid 44

**44** was prepared by Procedure B, 99% yield, (0.27 g, 0.99 mmol, white solid).

$^1\text{H}$  NMR (600 MHz,  $\text{CD}_3\text{OD}$ )  $\delta$  8.15 (d,  $J = 2.0$  Hz, 1H), 7.74 (ddd,  $J = 8.0, 2.1, 0.8$  Hz, 1H), 7.52 (d,  $J = 8.1$  Hz, 1H), 3.13 – 3.08 (m, 2H), 2.35 (t,  $J = 7.4$  Hz, 2H), 1.97 – 1.89 (m, 2H).

$^{13}\text{C}$  NMR (151 MHz,  $\text{CD}_3\text{OD}$ )  $\delta$  177.1, 169.3, 149.2, 133.2, 129.5 (q,  $J = 33.0$  Hz), 129.2 (q,  $J = 3.6$  Hz), 128.7 (q,  $J = 3.9$  Hz), 125.4 (q,  $J = 271.3$  Hz), 34.60, 34.5, 27.8.

$^{19}\text{F}$  NMR (376 MHz,  $\text{CD}_3\text{OD}$ )  $\delta$  -62.91.

HRMS (ESI-TOF) Calculated for  $\text{C}_{12}\text{H}_{12}\text{F}_3\text{O}_4$   $[\text{M}+\text{H}]^+$ : 277.0688, Found: 277.0681.

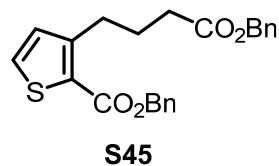

### Benzyl 3-(4-(benzyloxy)-4-oxobutyl)thiophene-2-carboxylate S45

**S45** was prepared by Procedure A, 85% yield for two steps, (0.67 g, 1.70 mmol, yellow oil).

$^1\text{H}$  NMR (600 MHz,  $\text{CDCl}_3$ )  $\delta$  7.43 (d,  $J = 5.4$  Hz, 1H), 7.42 – 7.27 (m, 10H), 7.03 (d,  $J = 5.4$  Hz, 1H), 5.28 (s, 2H), 5.11 (s, 2H), 3.26 – 3.20 (m, 2H), 2.39 (t,  $J = 8.5$  Hz, 2H), 2.07 – 1.99 (m, 2H).

$^{13}\text{C}$  NMR (151 MHz,  $\text{CDCl}_3$ )  $\delta$  173.1, 163.2, 154.1, 136.2, 136.1, 129.6, 128.7, 128.7, 128.4, 128.4, 128.4, 128.0, 121.8, 66.3, 33.7, 28.7, 26.7.

HRMS (ESI-TOF) Calculated for  $\text{C}_{23}\text{H}_{23}\text{O}_4\text{S}$   $[\text{M}+\text{H}]^+$ : 395.1317, found: 395.1309.

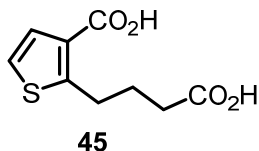

### 2-(3-carboxypropyl)thiophene-3-carboxylic acid **45**

**45** was prepared by Procedure C, 85% yield (182 mg, 0.85 mmol, white solid).

$^1\text{H}$  NMR (600 MHz,  $\text{CD}_3\text{OD}$ )  $\delta$  7.38 (d,  $J = 5.4$  Hz, 1H), 7.18 (dd,  $J = 5.3, 0.8$  Hz, 1H), 3.27 – 3.22 (m, 2H), 2.36 (t,  $J = 7.4$  Hz, 2H), 2.02 – 1.94 (m, 2H).

$^{13}\text{C}$  NMR (151 MHz,  $\text{CD}_3\text{OD}$ )  $\delta$  177.0, 166.5, 155.0, 130.7, 129.8, 129.6, 122.8, 34.2, 29.4, 28.0.

HRMS (ESI-TOF) Calculated for  $\text{C}_9\text{H}_9\text{O}_4\text{S}$   $[\text{M}-\text{H}]^-$ : 213.0222, found: 213.0218.

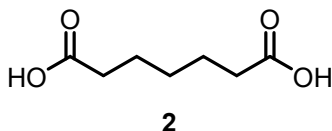

### Pimelic acid/heptane-1,7-dioic acid **2**

This compound is commercially available.

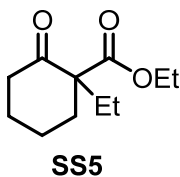

### Ethyl 1-ethyl-2-oxocyclohexane-1-carboxylate **SS5**

This compound was prepared according to the general procedure B for the preparation of  $\beta$ -substituted heptanedioic acids with the reaction of EtI and methyl 2-oxocyclohexane-1-carboxylate. 75% yield, (1.19 g, 6.0 mmol, colorless oil).

$^1\text{H}$  NMR (600 MHz,  $\text{CDCl}_3$ )  $\delta$  4.20 (q,  $J = 7.3$  Hz, 2H), 2.53 – 2.40 (m, 3H), 2.06 – 1.89 (m, 1H), 1.77 – 1.56 (m, 2H), 1.44 – 1.41 (m, 1H), 1.26 (t,  $J = 7.1$  Hz, 3H), 0.84 (t,  $J = 7.6$  Hz, 3H).

$^{13}\text{C}$  NMR (151 MHz,  $\text{CDCl}_3$ )  $\delta$  208.4, 172.1, 61.3, 61.2, 41.3, 35.7, 27.8, 27.7, 22.7, 14.3, 8.9.

The data is consistent with those reported in the literature.(40)

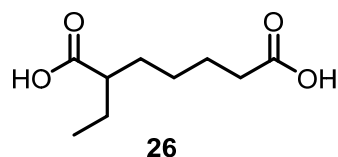

### 2-Ethylheptanedioic acid 26

This compound was prepared according to the general procedure B for the preparation of  $\beta$ -substituted heptanedioic acids. 75% yield, (0.85 g, 4.5 mmol, white solid).

$^1\text{H}$  NMR (500 MHz, DMSO)  $\delta$  12.00 (s, 2H), 2.18 (t,  $J = 7.3$  Hz, 2H), 2.12 (tt,  $J = 8.4, 5.4$  Hz, 1H), 1.55 – 1.40 (m, 5H), 1.40 – 1.33 (m, 1H), 1.23 (p,  $J = 7.7$  Hz, 2H), 0.90 – 0.74 (m, 3H).

$^{13}\text{C}$  NMR (126 MHz, DMSO)  $\delta$  176.8, 174.4, 46.4, 33.5, 31.2, 26.5, 26.5, 24.8, 24.5, 11.7, 11.6.

HRMS (ESI-TOF) Calculated for  $\text{C}_9\text{H}_{15}\text{O}_4$   $[\text{M}-\text{H}]^-$ : 187.0970, found: 187.0973.

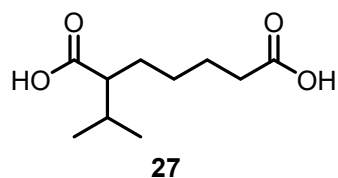

### 2-Isopropylheptanedioic acid 27

This compound was prepared according to the general procedure for the preparation of  $\alpha$ -substituted heptanedioic acids.

Elution condition: (20% EA/hexanes + 1% AcOH to 50% EA + 1% AcOH, gradient elution)

Isolated yield: 61% over 2 steps (1.23 g, 6.1 mmol, colourless oil)

$^1\text{H}$  NMR (500 MHz, DMSO)  $\delta$  11.98 (s, 2H), 2.18 (t,  $J = 7.3$  Hz, 2H), 1.95 (ddd,  $J = 9.5, 7.4, 4.8$  Hz, 1H), 1.73 (h,  $J = 6.8$  Hz, 1H), 1.56 – 1.44 (m, 2H), 1.42 (ddd,  $J = 9.7, 6.0, 4.0$  Hz, 2H), 1.29 – 1.13 (m, 2H), 0.91 – 0.82 (m, 6H).

$^{13}\text{C}$  NMR (126 MHz, DMSO)  $\delta$  176.4, 174.4, 174.3, 52.1, 33.6, 30.0, 28.8, 27.0, 24.6, 20.4, 20.0, 19.8.

HRMS (ESI-TOF) Calculated for  $\text{C}_{10}\text{H}_{17}\text{O}_4$   $[\text{M}-\text{H}]^-$ : 201.1127, Found: 201.1125.

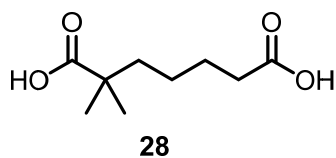

### 2,2-Dimethylheptanedioic acid 28

This compound was prepared according to the general procedure for the preparation of  $\alpha$ -substituted heptanedioic acids.

Elution condition: (20% EA/hexanes + 1% AcOH to 50% EA + 1% AcOH, gradient elution)

Isolated yield: 57% over 2 steps (1.07 g, 5.7 mmol, white solid)

$^1\text{H}$  NMR (500 MHz, DMSO)  $\delta$  3.33 (s, 2H), 2.19 (t,  $J = 7.3$  Hz, 2H), 1.54 – 1.37 (m, 4H), 1.19 (tq,  $J = 12.4, 6.0$  Hz, 2H), 1.06 (s, 6H).

$^{13}\text{C}$  NMR (126 MHz, DMSO)  $\delta$  178.8, 174.4, 41.2, 39.9, 33.6, 25.0, 25.0, 24.1.

HRMS (ESI-TOF) Calculated for  $\text{C}_9\text{H}_{15}\text{O}_4$   $[\text{M}-\text{H}]^-$ : 187.0970, Found: 187.0972.

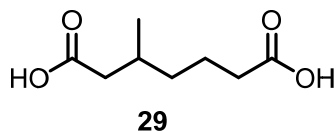

### 3-Methylheptanedioic acid 29

This compound was prepared according to the general procedure for the preparation of  $\beta$ -substituted heptanedioic acids:

Elution condition: (20% EA/hexanes + 1% AcOH to 50% EA + 1% AcOH, gradient elution)

Isolated yield: 20% over 2 steps (0.28 g, 1.6 mmol, pale yellow oil)

$^1\text{H}$  NMR (500 MHz, DMSO)  $\delta$  11.99 (s, 2H), 2.23 – 2.12 (m, 3H), 1.99 (dd,  $J = 15.0, 8.0$  Hz, 1H), 1.80 (dq,  $J = 13.8, 6.9$  Hz, 1H), 1.59 – 1.39 (m, 2H), 1.28 (ddt,  $J = 13.2, 10.9, 5.6$  Hz, 1H), 1.14 (dddd,  $J = 13.2, 10.5, 7.7, 5.4$  Hz, 1H), 0.88 (d,  $J = 6.6$  Hz, 3H).

$^{13}\text{C}$  NMR (126 MHz, DMSO)  $\delta$  174.4, 173.9, 41.3, 35.5, 33.8, 29.5, 22.0, 19.5.

HRMS (ESI-TOF) Calculated for  $\text{C}_8\text{H}_{13}\text{O}_4$   $[\text{M}-\text{H}]^-$ : 173.0814, Found: 173.0815.

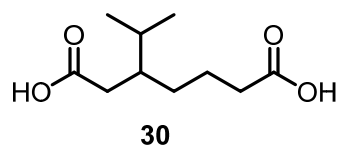

### 3-Isopropylheptanedioic acid 30

This compound was prepared according to the general procedure for the preparation of  $\beta$ -substituted heptanedioic acids:

Elution condition: (20% EA/hexanes + 1% AcOH to 50% EA + 1% AcOH, gradient elution) Isolated yield: 50% over 2 steps (0.81 g, 4 mmol, pale yellow oil).

$^1\text{H}$  NMR (500 MHz, DMSO)  $\delta$  11.97 (s, 2H), 2.25 – 2.09 (m, 3H), 2.01 (dd,  $J$  = 15.3, 7.1 Hz, 1H), 1.71 – 1.60 (m, 2H), 1.53 – 1.39 (m, 2H), 1.28 (ddt,  $J$  = 13.2, 11.0, 5.7 Hz, 1H), 1.14 (ddt,  $J$  = 13.0, 9.9, 6.8 Hz, 1H), 0.80 (dd,  $J$  = 13.6, 6.5 Hz, 6H).

$^{13}\text{C}$  NMR (126 MHz, DMSO)  $\delta$  174.7, 174.4, 40.0, 35.7, 33.9, 30.2, 29.4, 22.3, 19.2, 18.5.

HRMS (ESI-TOF) Calculated for  $\text{C}_{10}\text{H}_{17}\text{O}_4$  [ $\text{M}-\text{H}$ ] $^-$ : 201.1127, Found: 201.1127.

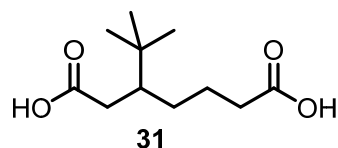

### 3-(*tert*-Butyl)heptanedioic acid 31

This compound was prepared according to the general procedure for the preparation of  $\beta$ -substituted heptanedioic acids:

Elution condition: (20% EA/hexanes + 1% AcOH to 50% EA + 1% AcOH, gradient elution) Isolated yield: 52% over 2 steps (0.9 g, 4.16 mmol, white solid).

$^1\text{H}$  NMR (500 MHz, DMSO)  $\delta$  11.97 (s, 2H), 2.29 (dd,  $J$  = 16.2, 5.1 Hz, 1H), 2.25 – 2.10 (m, 2H), 1.94 (dd,  $J$  = 16.2, 6.3 Hz, 1H), 1.62 – 1.51 (m, 2H), 1.51 – 1.42 (m, 1H), 1.42 – 1.33 (m, 1H), 0.98 (tdd,  $J$  = 11.9, 8.1, 3.6 Hz, 1H), 0.82 (s, 9H).

$^{13}\text{C}$  NMR (126 MHz, DMSO)  $\delta$  175.3, 174.4, 44.0, 35.6, 33.9, 33.2, 33.1, 30.2, 27.3, 23.6.

HRMS (ESI-TOF) Calculated for  $\text{C}_{11}\text{H}_{19}\text{O}_4$  [ $\text{M}-\text{H}$ ] $^-$ : 215.1283 Found: 215.1284.

## 2.5 Reaction procedures of the $\gamma$ -directed, $\gamma$ -C–H lactonization reaction

### General procedure for the $\gamma$ -directed, $\gamma$ -C–H lactonization reaction using $\text{Ag}_2\text{CO}_3$ as oxidant

To a 2-dram vial was added the substrate (0.1 mmol),  $\text{Pd}(\text{OAc})_2$  (10 mol%, 0.01 mmol), ligand (12 mol%, 0.012 mmol), *p*-xyloquinone (0.2 mmol),  $\text{Ag}_2\text{CO}_3$  (0.2 mmol),  $\text{K}_2\text{HPO}_4$  (0.035 mmol) and  $\text{CsOAc}$  (0.04 mmol, preferably added from a stock solution in HFIP as  $\text{CsOAc}$  is hygroscopic). HFIP (1.0 mL, or the volume needed to make up to 1.0 mL if a stock solution of  $\text{CsOAc}$  was used) and a stir-bar was then added, followed by sealing the reaction vessel with a PTFE septum inserted between the vial and its cap. **(Note:  $\text{Pd}(\text{OAc})_2$ , ligand, *p*-xyloquinone,  $\text{CsOAc}$ , and the substrate could all be prepared as a stock solution in HFIP. The use of stock solution is recommended for setting up a series of reactions to maximize work efficiency).** The reaction mixture was sonicated for 30 seconds before stirring at 200 rpm and 100 °C (heating block temperature) for 36 hours. The reaction mixture was then cooled to room temperature and diluted with dichloromethane (1.0 mL), followed by addition of deionized water (2.0 mL), aq. 6M HCl (0.3 mL), brine (1.0 mL) and then shaken vigorously. The lower organic layer was carefully pipetted and filtered through a short plug of Celite®. The remaining aqueous layer was extracted with  $\text{CH}_2\text{Cl}_2$  (1.0 mL) twice and the organic layer was pipetted and filtered as mentioned. The combined organic layer was then evaporated to dryness. The crude was then taken into  $\text{CDCl}_3$  (0.6 mL) with  $\text{CH}_2\text{Br}_2$  (10.0  $\mu\text{L}$ ) as the internal standard to determine the assay yield of the reaction by  $^1\text{H}$  NMR spectroscopy. The isolation of the product was carried out with aqueous extractions of the organic layer (in 0.6 mL  $\text{CDCl}_3$  diluted with 2.0 mL  $\text{CH}_2\text{Cl}_2$ ) with sat. aq.  $\text{NaHCO}_3$  solution (1.0 mL each, 3 times). The collected aqueous layer was then acidified by aq. 6M HCl to pH ~ 2 and extracted with EtOAc (1.0 mL, 3 times). The combined EtOAc layers was dried with anhydrous  $\text{MgSO}_4$ , filtered, and evaporated to dryness. The product was either further purified by column chromatography (General procedure for gradient elution unless stated otherwise: begin with 20% EtOAc/hexane + 1% AcOH, and increase the composition of EtOAc by 10% for every 8 mL of eluent used to 100% EtOAc + 1% AcOH, collecting 1.0-2.0 mL fractions. It was observed that the  $R_f$  values of carboxylic acids obtained by TLC analysis could not be directly used as a guide for column chromatography. Hence, the gradient elution method was employed for their purification.) or pTLC (exact eluent composition mentioned below for each example) or subject to further derivatization into benzyl esters for isolation if purification of the lactone acid was found to be not straightforward.

### Procedure for the gram scale $\gamma$ -directed, $\gamma$ -C–H lactonization reaction of pimelic acid 2 using $\text{Ag}_2\text{CO}_3$ as oxidant

To a 150 mL heavy wall pressure vessel with an internal thread (see picture below) was added pimelic acid (1.0 g, 6.24 mmol),  $\text{Pd}(\text{OAc})_2$  (140.0 mg, 0.62 mmol), ligand (164.0 mg, 0.62 mmol), *p*-xyloquinone (1.70 g, 12.5 mmol),  $\text{Ag}_2\text{CO}_3$  (3.45 g, 12.5 mmol),  $\text{K}_2\text{HPO}_4$  (380.0 mg, 2.18 mmol) and  $\text{CsOAc}$  (480.0 mg, 2.50 mmol, a stock solution is not required). HFIP (62.0 mL) and a stir-bar was then added, followed by sealing the reaction vessel with a screwed-on PTFE bushing. The reaction mixture was sonicated for **5 minutes** before stirring at **500 rpm** and 100 °C (oil bath temperature) for 36 hours. The reaction mixture was then cooled to room temperature and formic acid (5.0 mL) was added, followed by filtration through a short plug of Celite®. The filtrate was then concentrated under reduced pressure. The crude was dissolved in  $\text{CH}_2\text{Cl}_2$  (20.0 mL) and extracted with sat. aq.  $\text{NaHCO}_3$  (10.0 mL, 3 times). The aqueous layer was collected and combined, acidified by aq. 6M HCl to pH ~ 2 (slow addition of acid with vigorous stirring is recommended) and extracted with EtOAc (10.0 mL,

3 times). The combined EtOAc layers was dried with anhydrous  $\text{MgSO}_4$ , filtered, and evaporated to dryness. The product was purified by column chromatography (Begin with 50% EtOAc/hexane + 1% AcOH (300 mL), then 75% EtOAc/hexane + 1% AcOH (300 mL), and finally 100% EtOAc + 1% AcOH (300 mL)). The desired product **2b** was isolated as a brown oil (631 mg, 3.99 mmol, 63%).

#### Experimental observations:

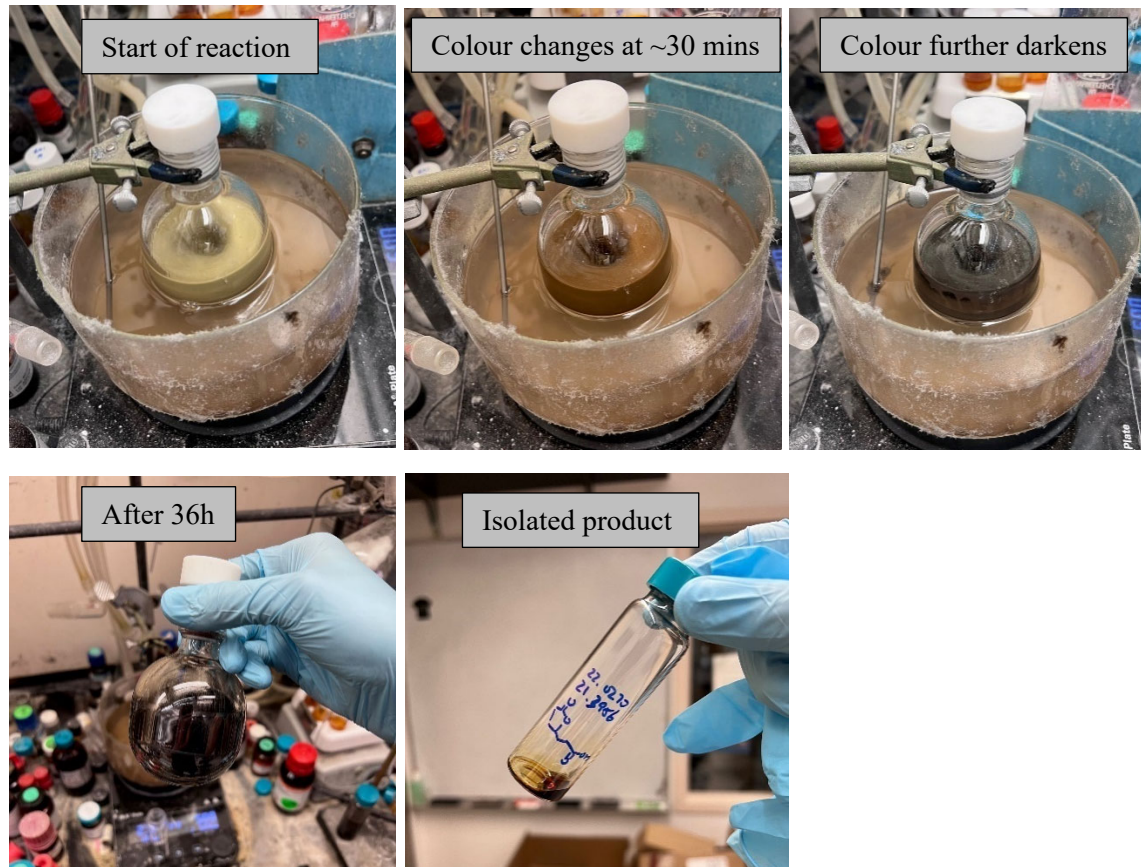

#### General procedure for the $\gamma$ -directed, $\gamma$ -C-H lactonization reaction using $\text{MnO}_2$ as oxidant

To a 2-dram vial was added the substrate (0.1 mmol),  $\text{Pd}(\text{OAc})_2$  (10 mol%, 0.01 mmol), ligand (12 mol%, 0.012 mmol), *p*-xyloquinone (0.2 mmol),  $\text{MnO}_2$  (0.4 mmol),  $\text{K}_2\text{HPO}_4$  (0.021 mmol),  $\text{KH}_2\text{PO}_4$  (0.032 mmol),  $\text{CsOAc}$  (0.021 mmol, preferably added from a stock solution in HFIP as  $\text{CsOAc}$  is hygroscopic). HFIP (1.0 mL, or the volume needed to make up to 1.0 mL if a stock solution of  $\text{CsOAc}$  was used) and a stir-bar was then added, followed by sealing the reaction vessel with a PTFE septum inserted between the vial and its cap. (**Note:  $\text{Pd}(\text{OAc})_2$ , ligand, *p*-xyloquinone,  $\text{CsOAc}$ , and the substrate could all be prepared as a stock solution in HFIP. The use of stock solution is recommended for setting up a series of reactions to maximize work efficiency**). The reaction mixture was sonicated for 30 seconds before stirring at 200 rpm and 100 °C (heating block temperature) for 36-48 hours. The reaction mixture was then cooled to room temperature and diluted with dichloromethane (1.0 mL), followed by addition of deionized water (2.0 mL), aq. 6M HCl (0.3 mL), brine (1.0 mL) and then shaken vigorously. The lower organic layer was carefully pipetted and filtered through a short plug of Celite®. The remaining aqueous layer was extracted with  $\text{CH}_2\text{Cl}_2$  (1.0 mL) twice and the organic layer was pipetted and filtered as mentioned. The combined organic layer was



then evaporated to dryness. The crude was then taken into  $\text{CDCl}_3$  (0.6 mL) with  $\text{CH}_2\text{Br}_2$  (10.0  $\mu\text{L}$ ) as the internal standard to determine the assay yield of the reaction by  $^1\text{H}$  NMR spectroscopy. The isolation of the product was carried out with aqueous extractions of the organic layer (in 0.6 mL  $\text{CDCl}_3$  diluted with 2.0 mL  $\text{CH}_2\text{Cl}_2$ ) with sat. aq.  $\text{NaHCO}_3$  solution (1.0 mL each, 3 times). The collected aqueous layer was then acidified by aq. 6M  $\text{HCl}$  to  $\text{pH} \sim 2$  and extracted with  $\text{EtOAc}$  (1.0 mL, 3 times). The combined  $\text{EtOAc}$  layers was dried with anhydrous  $\text{MgSO}_4$ , filtered, and evaporated to dryness. The product was either further purified by column chromatography (General procedure for gradient elution unless stated otherwise: begin with 20%  $\text{EtOAc}$ /hexane + 1%  $\text{AcOH}$ , and increase the composition of  $\text{EtOAc}$  by 10% for every 8 mL of eluent used to 100%  $\text{EtOAc}$  + 1%  $\text{AcOH}$ , collecting 1.0-2.0 mL fractions. It was observed that the  $R_f$  values of carboxylic acids obtained by TLC analysis could not be directly used as a guide for column chromatography. Hence, the gradient elution method was employed for their purification.) or pTLC (exact eluent composition mentioned below for each example) or subject to further derivatization into benzyl esters for isolation if purification of the lactone acid was found to be not straightforward.

**Note:** Using the correct type of  $\text{MnO}_2$  is crucial for reproducibility.  $\text{MnO}_2$  (mesh, on the left) was found to be more active for this reaction than  $\text{MnO}_2$  (powder, on the right).

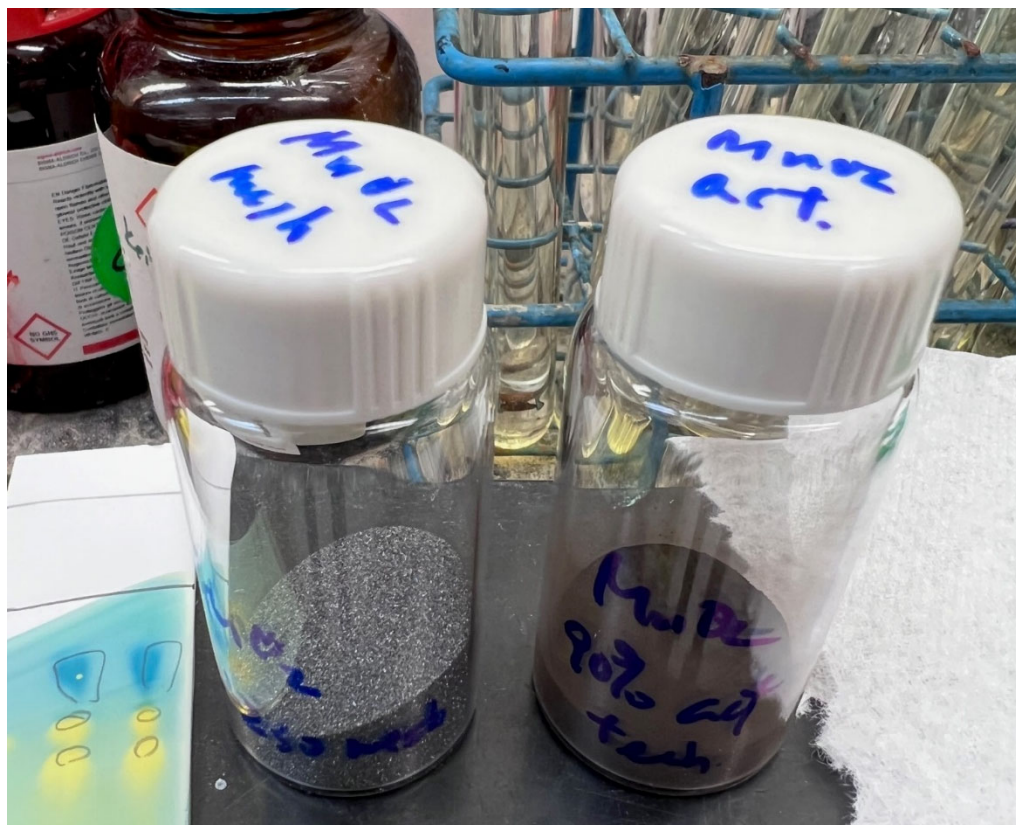

### General procedure for benzyl ester formation

To the product obtained after aqueous extraction with sat.  $\text{NaHCO}_3$  solution as mentioned above was added dry  $\text{CH}_2\text{Cl}_2$  (2.0 mL),  $\text{BnOH}$  (1.2 eq.),  $\text{DMAP}$  (1.2 eq.) and  $\text{EDCI}$  (1.2 eq.) sequentially at room temperature. The reaction mixture was stirred at room temperature overnight, and completion of the reaction was confirmed by TLC analysis of the reaction mixture. The reaction mixture was then

quenched by the addition of water and extracted with  $\text{CH}_2\text{Cl}_2$  (3 times), and the desired product was purified by pTLC (exact eluent composition mentioned below for each example).

## 2.6 Characterization data of products obtained from $\gamma$ -directed, $\gamma$ -C–H lactonization reaction

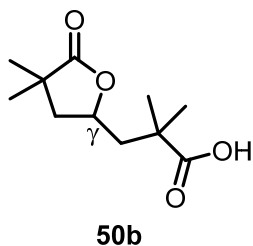

### 3-(4,4-Dimethyl-5-oxotetrahydrofuran-2-yl)-2,2-dimethylpropanoic acid **50b**

Following the general procedure for its synthesis, the compound was purified as the acid by column chromatography (General procedure for gradient elution: begin with 20% EtOAc/hexane + 1% AcOH, and increase the composition of EtOAc by 10% for every 8 mL of eluent used to 100% EtOAc + 1% AcOH). Isolated yield >99% (21.4 mg, 0.1 mmol, off white solid).

$^1\text{H}$  NMR (400 MHz,  $\text{CDCl}_3$ )  $\delta$  4.53 (dq,  $J = 9.9, 5.9$  Hz, 1H), 2.19 (dd,  $J = 12.7, 5.9$  Hz, 1H), 1.93 (d,  $J = 5.9$  Hz, 2H), 1.73 (dd,  $J = 12.7, 9.9$  Hz, 1H), 1.31 (s, 3H), 1.29 (s, 3H), 1.25 (s, 3H), 1.24 (s, 3H).

$^{13}\text{C}$  NMR (100 MHz,  $\text{CDCl}_3$ )  $\delta$  183.8, 182.0, 74.5, 45.9, 44.5, 41.4, 40.1, 26.1, 25.1, 25.1, 24.4.

HRMS (ESI-TOF) Calculated for  $\text{C}_{11}\text{H}_{17}\text{O}_4$   $[\text{M}-\text{H}]^-$ : 213.1127, Found: 213.1128

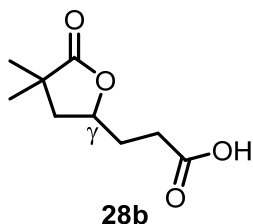

### 3-(4,4-Dimethyl-5-oxotetrahydrofuran-2-yl)propanoic acid **28b**

Following the general procedure for its synthesis, the compound was purified as the acid by column chromatography (General procedure for gradient elution: begin with 20% EtOAc/hexane + 1% AcOH, and increase the composition of EtOAc by 10% for every 8 mL of eluent used to 100% EtOAc + 1% AcOH). Isolated yield 62% (11.4 mg, 0.062 mmol, off white solid).

$^1\text{H}$  NMR (500 MHz,  $\text{CDCl}_3$ )  $\delta$  4.48 (dddd,  $J = 9.9, 8.9, 5.9, 4.1$  Hz, 1H), 2.76 – 2.49 (m, 2H), 2.20 (dd,  $J = 12.7, 5.9$  Hz, 1H), 2.02 (dtd,  $J = 15.3, 7.7, 4.1$  Hz, 1H), 1.98 – 1.89 (m, 1H), 1.75 (dd,  $J = 12.7, 9.9$  Hz, 1H), 1.28 (s, 3H), 1.26 (s, 3H).

$^{13}\text{C}$  NMR (126 MHz,  $\text{CDCl}_3$ )  $\delta$  181.8, 178.2, 75.9, 43.4, 40.6, 30.7, 30.1, 25.2, 24.6.

HRMS (ESI-TOF) Calculated for  $\text{C}_9\text{H}_{13}\text{O}_4$   $[\text{M}-\text{H}]^-$ : 185.0814, Found: 185.0815.

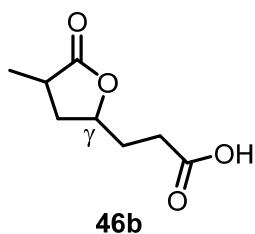

### 3-(4-Methyl-5-oxotetrahydrofuran-2-yl)propanoic acid 46b

Following the general procedure for its synthesis, the compound was purified as the acid by column chromatography (General procedure for gradient elution: begin with 20% EtOAc/hexane + 1% AcOH, and increase the composition of EtOAc by 10% for every 8 mL of eluent used to 100% EtOAc + 1% AcOH). Isolated yield 61% (10.5 mg, 0.061 mmol, colorless oil, d.r = 1.3:1). Diastereomers were not separable by column chromatography,  $^1\text{H}$  and  $^{13}\text{C}$  NMR data reported as a mixture of diastereomers.

NMR for minor isomer:  $^1\text{H}$  NMR (600 MHz,  $\text{CDCl}_3$ )  $\delta$  4.61 – 4.54 (m, 1H), 2.61 – 2.48 (m, 3H), 2.18 – 2.09 (m, 1H), 1.98 – 1.90 (m, 3H), 1.28 (d,  $J = 7.4$  Hz, 3H).

$^{13}\text{C}$  NMR (151 MHz,  $\text{CDCl}_3$ )  $\delta$  179.9, 178.5, 77.2, 35.5, 34.0, 30.4, 30.1, 15.9.

NMR for major isomer:  $^1\text{H}$  NMR (600 MHz,  $\text{CDCl}_3$ )  $\delta$  4.41 (dddd,  $J = 10.1, 8.8, 5.5, 4.1$  Hz, 1H), 2.77 – 2.64 (m, 2H), 2.61 – 2.48 (m, 2H), 2.08 – 1.98 (m, 2H), 1.52 (td,  $J = 12.3, 10.4$  Hz, 1H), 1.27 (d,  $J = 7.1$  Hz, 3H).

$^{13}\text{C}$  NMR (151 MHz,  $\text{CDCl}_3$ )  $\delta$  179.4, 178.5, 77.2, 37.2, 36.0, 30.5, 30.1, 15.2.

HRMS (ESI-TOF) Calculated for  $\text{C}_8\text{H}_{11}\text{O}_4$  for  $[\text{M}-\text{H}]^-$ : 171.0657, found 171.0657.

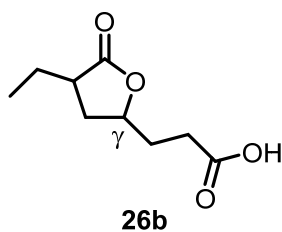

### 3-(4-Ethyl-5-oxotetrahydrofuran-2-yl)propanoic acid 26b

Following the general procedure for its synthesis, the compound was purified as the acid by column chromatography (General procedure for gradient elution: begin with 20% EtOAc/hexane + 1% AcOH, and increase the composition of EtOAc by 10% for every 8 mL of eluent used to 100% EtOAc + 1% AcOH). Isolated yield 54% (10.0 mg, 0.054 mmol, colorless oil, d.r. = 1.2:1). Diastereomers were not separable by column chromatography,  $^1\text{H}$  and  $^{13}\text{C}$  NMR data reported as a mixture of diastereomers.

NMR for minor isomer:  $^1\text{H}$  NMR (600 MHz,  $\text{CDCl}_3$ )  $\delta$  4.59 – 4.50 (m, 1H), 2.66 – 2.51 (m, 3H), 2.15 – 2.06 (m, 2H), 2.07 – 2.00 (m, 2H), 1.88 – 1.82 (m, 1H), 1.58 – 1.42 (m, 1H), 1.01 (t,  $J = 6.6$  Hz, 3H).

$^{13}\text{C}$  NMR (151 MHz,  $\text{CDCl}_3$ )  $\delta$  179.2, 178.3, 77.5, 40.7, 33.1, 30.7, 30.1, 24.1, 11.8.

NMR for major isomer:  $^1\text{H}$  NMR (600 MHz,  $\text{CDCl}_3$ )  $\delta$  4.42 (dddd,  $J = 9.9, 8.6, 5.7, 4.1$  Hz, 1H), 2.66 – 2.51 (m, 3H), 1.98 – 1.89 (m, 4H), 1.58 – 1.44 (m, 2H), 1.01 (t,  $J = 6.6$  Hz, 3H).

$^{13}\text{C}$  NMR (151 MHz,  $\text{CDCl}_3$ )  $\delta$  178.6, 178.3, 77.5, 42.5, 34.5, 30.6, 30.1, 23.4, 11.7.

HRMS (ESI-TOF) Calculated  $\text{C}_9\text{H}_{13}\text{O}_4$  for  $[\text{M}-\text{H}]^-$ : 185.0814, found 185.0812.

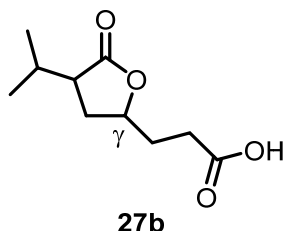

### 3-(4-Isopropyl-5-oxotetrahydrofuran-2-yl)propanoic acid **27b**

Following the general procedure for its synthesis, the compound was purified as the acid by column chromatography (General procedure for gradient elution: begin with 20% EtOAc/hexane + 1% AcOH, and increase the composition of EtOAc by 10% for every 8 mL of eluent used to 100% EtOAc + 1% AcOH). Isolated yield 74% (14.8 mg, 0.074 mmol, colorless oil, d.r = 1.1:1). Diastereomers were not separable by column chromatography,  $^1\text{H}$  and  $^{13}\text{C}$  NMR data reported as a mixture of diastereomers.

NMR for minor diastereomer:  $^1\text{H}$  NMR (600 MHz,  $\text{CDCl}_3$ )  $\delta$  4.51 (tt,  $J = 9.0, 4.9$  Hz, 1H), 2.64 – 2.58 (m, 1H), 2.58 – 2.48 (m, 2H), 2.25 – 2.21 (m, 1H), 2.16 – 2.12 (m, 1H), 2.00 – 1.88 (m, 3H), 1.07 – 0.98 (m, 3H), 0.91 (dd,  $J = 6.8, 1.1$  Hz, 3H).

$^{13}\text{C}$  NMR (151 MHz,  $\text{CDCl}_3$ )  $\delta$  178.5, 178.2, 77.6, 47.2, 31.1, 30.1, 29.6, 28.9, 20.6, 18.3.

NMR for major diastereomer:  $^1\text{H}$  NMR (600 MHz,  $\text{CDCl}_3$ )  $\delta$  4.39 (tdd,  $J = 9.8, 5.6, 4.2$  Hz, 1H), 2.64 – 2.58 (m, 1H), 2.58 – 2.48 (m, 2H), 2.30 (ddd,  $J = 12.8, 8.8, 5.7$  Hz, 1H), 2.21 – 2.16 (m, 1H), 2.04 (dtd,  $J = 15.2, 7.7, 4.1$  Hz, 1H), 2.00 – 1.88 (m, 1H), 1.64 (td,  $J = 12.4, 10.2$  Hz, 1H), 1.07 – 0.98 (m, 3H), 0.94 (dd,  $J = 6.8, 1.1$  Hz, 3H).

$^{13}\text{C}$  NMR (151 MHz,  $\text{CDCl}_3$ )  $\delta$  178.2, 177.9, 77.1, 45.4, 30.6, 30.3, 30.1, 27.6, 20.8, 18.7.

HRMS (ESI-TOF) Calculated for  $\text{C}_{10}\text{H}_{15}\text{O}_4$   $[\text{M}-\text{H}]^-$ : 199.0970, Found: 199.0972.

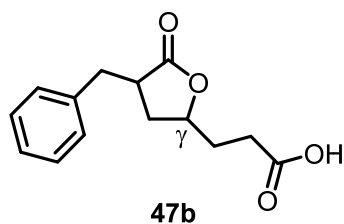

### 3-(4-Benzyl-5-oxotetrahydrofuran-2-yl)propanoic acid **47b**

Following the general procedure for its synthesis, the compound was purified as the acid by column chromatography (General procedure for gradient elution: begin with 20% EtOAc/hexane + 1% AcOH, and increase the composition of EtOAc by 10% for every 8 mL of eluent used to 100% EtOAc + 1% AcOH). Isolated yield 57% (14.1 mg, 0.057 mmol, colorless oil, d.r. = 1.2:1). Diastereomers were not separable by column chromatography,  $^1\text{H}$  and  $^{13}\text{C}$  NMR data reported as a mixture of diastereomers.

NMR for minor isomer:  $^1\text{H}$  NMR (600 MHz,  $\text{CDCl}_3$ )  $\delta$  7.35 – 7.13 (m, 5H), 4.44 – 4.33 (m, 1H), 3.18 (dd,  $J = 13.9, 4.5$  Hz, 1H), 3.00 – 2.89 (m, 1H), 2.78 (dd,  $J = 13.8, 9.4$  Hz, 1H), 2.59 – 2.41 (m, 2H), 2.14 (dt,  $J = 13.2, 7.5$  Hz, 1H), 1.91 – 1.81 (m, 3H).

$^{13}\text{C}$  NMR (151 MHz,  $\text{CDCl}_3$ )  $\delta$  178.1, 177.9, 138.5, 128.9, 128.9, 126.9, 77.6, 42.9, 36.2, 34.6, 30.4, 29.9.

NMR for major isomer:  $^1\text{H}$  NMR (600 MHz,  $\text{CDCl}_3$ )  $\delta$  7.35 – 7.13 (m, 5H), 4.44 – 4.33 (m, 1H), 3.28 (dd,  $J = 14.0, 4.3$  Hz, 1H), 3.00 – 2.89 (m, 1H), 2.73 (dd,  $J = 14.1, 9.5$  Hz, 1H), 2.59 – 2.41 (m, 2H), 2.32 (ddd,  $J = 12.7, 8.5, 5.6$  Hz, 1H), 1.99 – 1.91 (m, 2H), 1.58 (td,  $J = 12.3, 10.2$  Hz, 1H).

$^{13}\text{C}$  NMR (151 MHz,  $\text{CDCl}_3$ )  $\delta$  178.1, 177.9, 138.5, 128.9, 128.9, 127.0, 77.6, 42.9, 36.2, 34.6, 30.4, 29.9.

HRMS (ESI-TOF) Calculated for  $\text{C}_{14}\text{H}_{17}\text{O}_4$   $[\text{M}+\text{H}]^+$ : 249.1127, Found: 249.1134.

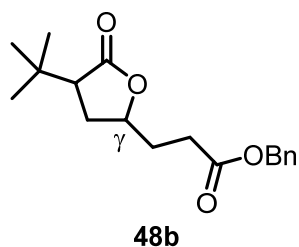

### Benzyl 3-(4-(*tert*-butyl)-5-oxotetrahydrofuran-2-yl)propanoate **48b**

Following the general procedure for its synthesis and benzyl ester formation, the compound was purified as the benzyl ester by pTLC (10% EA/hexanes,  $R_f = 0.30$ ). Isolated yield 57% over 2 steps (17.3 mg, 0.057 mmol, colourless oil, d.r. = 1:1). Diastereomers were not separable by column chromatography,  $^1\text{H}$  and  $^{13}\text{C}$  NMR data reported as a mixture of diastereomers.

$^1\text{H}$  NMR (600 MHz,  $\text{CDCl}_3$ )  $\delta$  7.41 – 7.29 (m, 10H), 5.26 – 4.97 (m, 4H), 4.43 (ddt,  $J = 8.9, 8.0, 4.8$  Hz, 1H), 4.29 (dddd,  $J = 10.1, 8.4, 5.6, 4.3$  Hz, 1H), 2.62 – 2.49 (m, 4H), 2.49 – 2.45 (m, 1H), 2.45 – 2.41 (m, 1H), 2.35 – 2.27 (m, 1H), 2.27 – 2.21 (m, 1H), 2.04 (dddd,  $J = 14.3, 8.3, 7.3, 4.3$  Hz, 1H), 1.98 – 1.88 (m, 4H), 1.66 (td,  $J = 12.6, 10.5$  Hz, 1H), 1.04 (s, 18H).

$^{13}\text{C}$  NMR (151 MHz,  $\text{CDCl}_3$ )  $\delta$  177.2, 176.6, 172.7, 172.7, 135.9, 135.9, 128.7, 128.7, 128.5, 128.5, 128.4, 128.4, 76.7, 76.1, 66.6, 66.6, 50.9, 49.0, 32.9, 31.8, 31.7, 31.3, 30.7, 30.4, 30.4, 30.3, 27.5, 27.3.

HRMS (ESI-TOF) Calculated for  $\text{C}_{18}\text{H}_{25}\text{O}_4$   $[\text{M}+\text{H}]^+$ : 305.1753, Found: 305.1754.

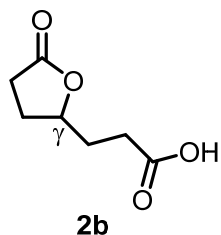

### 3-(5-Oxotetrahydrofuran-2-yl)propanoic acid **2b**

Following the general procedure for its synthesis, the compound was purified as the acid by column chromatography (General procedure for gradient elution: begin with 50% EtOAc/hexane + 1% AcOH, and increase the composition of EtOAc by 10% for every 8 mL of eluent used to 100% EtOAc + 1% AcOH). Isolated yield 62% (9.8 mg, 0.062 mmol, colorless oil).

$^1\text{H}$  NMR (600 MHz,  $\text{CDCl}_3$ )  $\delta$  4.57 (dddd,  $J = 9.1, 7.4, 6.8, 4.7$  Hz, 1H), 2.74 – 2.45 (m, 4H), 2.38 (dq,  $J = 12.7, 6.9$  Hz, 1H), 2.03 (dq,  $J = 14.6, 7.8$  Hz, 1H), 1.96 (dt,  $J = 14.6, 7.4$  Hz, 1H), 1.89 (dq,  $J = 12.7, 9.1$  Hz, 1H).

$^{13}\text{C}$  NMR (151 MHz,  $\text{CDCl}_3$ )  $\delta$  176.9, 176.4, 79.6, 30.6, 29.7, 28.8, 28.1.

HRMS (ESI-TOF) Calculated for  $\text{C}_7\text{H}_9\text{O}_4$   $[\text{M}-\text{H}]^-$ : 157.0501, found: 157.0501.

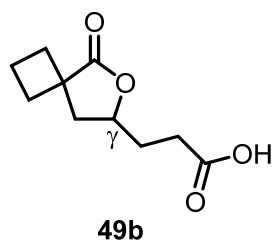

### 3-(5-Oxo-6-oxaspiro[3.4]octan-7-yl)propanoic acid 49b

Following the general procedure for its synthesis, the compound was purified as the acid by column chromatography (General procedure for gradient elution: begin with 20% EtOAc/hexane + 1% AcOH, and increase the composition of EtOAc by 10% for every 8 mL of eluent used to 100% EtOAc + 1% AcOH). Isolated yield 60% (11.9 mg, 0.060 mmol, off white solid).

$^1\text{H}$  NMR (500 MHz,  $\text{CDCl}_3$ )  $\delta$  4.39 (tdd,  $J = 8.7, 6.1, 4.1$  Hz, 1H), 2.62 – 2.54 (m, 2H), 2.54 – 2.47 (m, 2H), 2.47 – 2.39 (m, 1H), 2.17 – 2.11 (m, 1H), 2.11 – 2.05 (m, 1H), 2.02 – 1.96 (m, 3H), 1.95 – 1.91 (m, 1H), 1.91 – 1.85 (m, 1H).

$^{13}\text{C}$  NMR (126 MHz,  $\text{CDCl}_3$ )  $\delta$  180.9, 178.2, 76.3, 44.5, 41.9, 31.8, 30.6, 30.1, 29.7, 16.6.

HRMS (ESI-TOF) Calculated for  $\text{C}_{10}\text{H}_{13}\text{O}_4$  [ $\text{M}-\text{H}$ ]: 197.0814, Found: 197.0813.

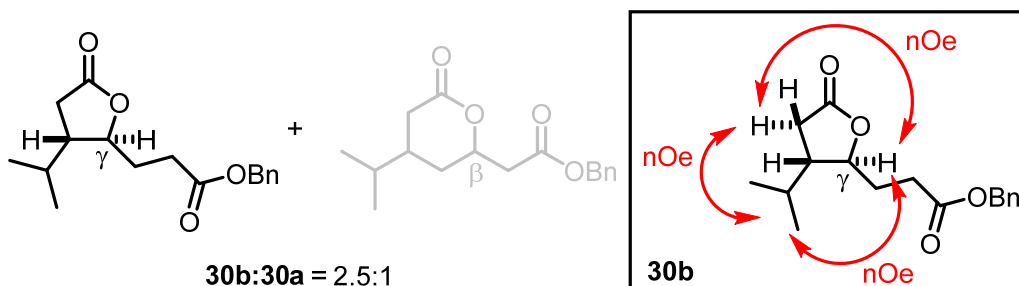

### Benzyl 3-((2*S*\*,3*S*\*)-3-isopropyl-5-oxotetrahydrofuran-2-yl)propanoate 30b

Following the general procedure for its synthesis and benzyl ester formation, the mixture of compound **30b** and **30a** was obtained as the benzyl ester by pTLC (20% EA/hexanes,  $R_f = 0.30$ ). Total isolated yield 50% over 2 steps, (14.5 mg, 0.050 mmol, colourless oil, **30b:30a** = 2.5:1). A sample of the lactone **30b** (7.0 mg, 0.024 mmol, colourless oil) was obtained by further purification (pTLC, 10% EA/hexanes,  $R_f = 0.17$ ) for unambiguous characterization.

$^1\text{H}$  NMR (500 MHz,  $\text{CDCl}_3$ )  $\delta$  7.54 – 7.29 (m, 5H), 5.24 – 5.02 (m, 2H), 4.29 (ddd,  $J = 9.8, 6.5, 3.1$  Hz, 1H), 2.76 – 2.47 (m, 3H), 2.31 (dd,  $J = 18.0, 9.0$  Hz, 1H), 2.10 (dtd,  $J = 14.5, 7.9, 3.1$  Hz, 1H), 1.98 (dddd,  $J = 9.0, 7.9, 6.5, 6.5$  Hz, 1H), 1.85 (dddd,  $J = 14.5, 9.8, 7.5, 5.8$  Hz, 1H), 1.71 (h,  $J = 6.8$  Hz, 1H), 0.94 (d,  $J = 6.7$  Hz, 3H), 0.90 (d,  $J = 6.7$  Hz, 3H).



$^{13}\text{C}$  NMR (126 MHz,  $\text{CDCl}_3$ )  $\delta$  176.5, 172.8, 135.9, 128.7, 128.5, 128.4, 82.8, 66.6, 47.1, 32.3, 31.2, 30.8, 30.5, 20.6, 19.5.

HRMS (ESI-TOF) Calculated for  $\text{C}_{17}\text{H}_{23}\text{O}_4$   $[\text{M}+\text{H}]^+$ : 291.1596, Found: 291.1597.

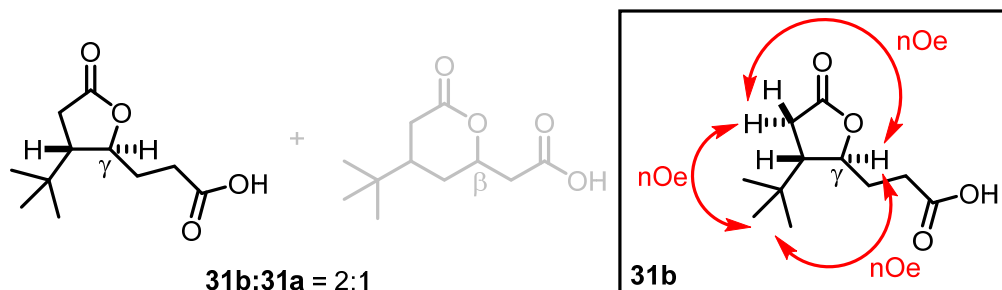

### 3-((2*S*\*,3*S*\*)-3-(tert-butyl)-5-oxotetrahydrofuran-2-yl)propanoic acid **31b**

Following the general procedure for its synthesis, the mixture of compounds **31b** and **31a** was obtained as the acid by column chromatography (Gradient elution: begin with 20% EtOAc/hexane + 1% AcOH, and increase the composition of EtOAc by 10% for every 8 mL of eluent used to 70% EtOAc + 1% AcOH). Total isolated yield 70% (15.0 mg, 0.070 mmol, colourless oil, **31b:31a** = 2:1). A sample of the lactone **31b** (3.0 mg, 0.014 mmol, white solid) was obtained by further purification (Gradient elution: begin with 20% EtOAc/hexane + 1% AcOH, and increase the composition of EtOAc by 10% for every 8 mL of eluent used to 50% EtOAc + 1% AcOH, then continue elution using this eluant for the separation of the two lactones) for unambiguous characterization.

$^1\text{H}$  NMR (600 MHz,  $\text{CDCl}_3$ )  $\delta$  4.44 (ddd,  $J$  = 11.3, 4.5, 3.3 Hz, 1H), 2.72 – 2.52 (m, 3H), 2.42 (dd,  $J$  = 18.6, 5.5 Hz, 1H), 2.03 (ddd,  $J$  = 14.5, 7.4, 3.3 Hz, 1H), 1.98 (ddd,  $J$  = 10.1, 5.5, 4.5 Hz, 1H), 1.87 (ddd,  $J$  = 14.5, 11.3, 6.5 Hz, 1H), 0.92 (s, 9H).

$^{13}\text{C}$  NMR (151 MHz,  $\text{CDCl}_3$ )  $\delta$  177.5, 176.9, 81.0, 50.4, 32.4, 32.1, 30.5, 30.0, 26.9.

HRMS (ESI-TOF) Calculated for  $\text{C}_{11}\text{H}_{17}\text{O}_4$   $[\text{M}-\text{H}]^-$ : 213.1127, Found: 213.1130.

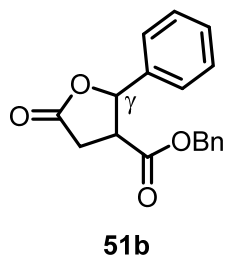

### Benzyl 5-oxo-2-phenyltetrahydrofuran-3-carboxylate **51b**

Following the general procedure for its synthesis and benzyl ester formation, the compound was purified as the benzyl ester by pTLC (30% EA/hexanes,  $R_f$  = 0.20). Isolated yield 36% over 2 steps (Total yield 71% for both diastereomers), (10.7 mg, 0.036 mmol, off white solid).

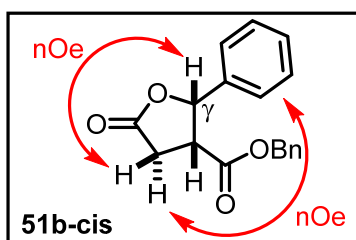

**Cis-isomer:**  $^1\text{H}$  NMR (400 MHz,  $\text{CDCl}_3$ )  $\delta$  7.36 – 7.28 (m, 6H), 7.25 – 7.21 (m, 2H), 7.10 – 7.00 (m, 2H), 5.75 (d,  $J = 7.8$  Hz, 1H), 4.79 (d,  $J = 12.1$  Hz, 1H), 4.52 (d,  $J = 12.1$  Hz, 1H), 3.76 (ddd,  $J = 8.7, 7.8, 5.3$  Hz, 1H), 3.11 (dd,  $J = 17.7, 5.3$  Hz, 1H), 2.82 (dd,  $J = 17.7, 8.7$  Hz, 1H).

$^{13}\text{C}$  NMR (100 MHz,  $\text{CDCl}_3$ )  $\delta$  175.0, 169.7, 135.2, 134.7, 129.1, 128.7, 128.7, 128.7, 128.7, 125.8, 81.3, 67.4, 46.8, 31.7.

HRMS (ESI-TOF) Calculated for  $\text{C}_{18}\text{H}_{17}\text{O}_4$   $[\text{M}+\text{H}]^+$ : 297.1127, Found: 297.1118.

Following the general procedure for its synthesis and benzyl ester formation, the compound was purified as the benzyl ester by pTLC (30% EA/hexanes,  $R_f = 0.45$ ). Isolated yield 35% over 2 steps (Total yield 71% for both diastereomers), (10.5 mg, 0.035 mmol, off white solid).

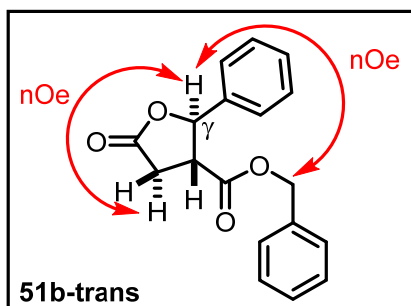

**Trans-isomer:**  $^1\text{H}$  NMR (400 MHz,  $\text{CDCl}_3$ )  $\delta$  7.42 – 7.33 (m, 6H), 7.33 – 7.27 (m, 4H), 5.63 (d,  $J = 7.3$  Hz, 1H), 5.23 (d,  $J = 12.1$  Hz, 1H), 5.17 (d,  $J = 12.2$  Hz, 1H), 3.37 (ddd,  $J = 9.4, 8.9, 7.3$  Hz, 1H), 3.02 (dd,  $J = 17.7, 8.9$  Hz, 1H), 2.91 (dd,  $J = 17.8, 9.4$  Hz, 1H).

$^{13}\text{C}$  NMR (100 MHz,  $\text{CDCl}_3$ )  $\delta$  174.2, 170.7, 138.0, 135.0, 129.1, 129.0, 128.9, 128.9, 128.6, 125.6, 82.4, 67.7, 48.9, 32.4.

HRMS (ESI-TOF) Calculated for  $\text{C}_{18}\text{H}_{17}\text{O}_4$   $[\text{M}+\text{H}]^+$ : 297.1127, Found: 297.1127.

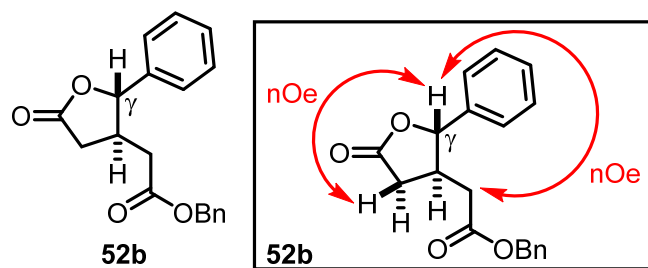

### Benzyl 2-((2*S*\*,3*S*\*)-5-oxo-2-phenyltetrahydrofuran-3-yl)acetate **52b**

Following the general procedure for its synthesis and benzyl ester formation, the compound was purified as the benzyl ester by pTLC (20% EA/hexanes,  $R_f = 0.25$ ). Isolated yield 25% over 2 steps, (7.8 mg, 0.025 mmol, off white solid).

$^1\text{H}$  NMR (500 MHz,  $\text{CDCl}_3$ )  $\delta$  7.42 – 7.30 (m, 10H), 5.12 (d,  $J = 7.0$  Hz, 1H), 5.12 – 5.05 (m, 2H), 2.91 (dd,  $J = 16.7, 8.2$  Hz, 1H), 2.84 (dddd,  $J = 8.2, 8.2, 8.1, 7.0, 5.6$  Hz, 1H), 2.67 (dd,  $J = 16.3, 5.6$  Hz, 1H), 2.52 (dd,  $J = 16.3, 8.1$  Hz, 1H), 2.42 (dd,  $J = 16.7, 8.2$  Hz, 1H).

$^{13}\text{C}$  NMR (126 MHz,  $\text{CDCl}_3$ )  $\delta$  175.6, 170.8, 137.6, 135.4, 129.1, 129.0, 128.9, 128.8, 128.6, 126.1, 85.5, 67.1, 41.2, 36.4, 34.9.

HRMS (ESI-TOF) Calculated for  $\text{C}_{19}\text{H}_{19}\text{O}_4$   $[\text{M}+\text{H}]^+$ : 311.1283, Found: 311.1278.

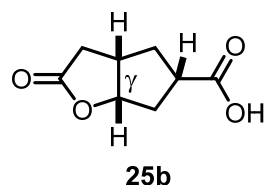

### (3*aS*\*,5*S*\*,6*aS*\*)-2-Oxohexahydro-2*H*-cyclopenta[*b*]furan-5-carboxylic acid **25b**

Following the general procedure for its synthesis, the compound was purified as the acid by column chromatography (General procedure for gradient elution: begin with 20% EtOAc/hexane + 1% AcOH, and increase the composition of EtOAc by 10% for every 8 mL of eluent used to 100% EtOAc + 1% AcOH). Isolated yield 66% (11.2 mg, 0.066 mmol, off white solid).

$^1\text{H}$  NMR (400 MHz,  $\text{CDCl}_3$ )  $\delta$  4.97 (td,  $J = 6.2, 2.4$  Hz, 1H), 2.95 (dddd,  $J = 8.8, 8.1, 6.5, 6.3$  Hz, 1H), 2.91 (dddd,  $J = 10.0, 8.1, 6.9, 6.2$  Hz, 1H), 2.78 (dd,  $J = 17.7, 10.0$  Hz, 1H), 2.51 (d,  $J = 17.7$  Hz, 1H), 2.42 (ddd,  $J = 15.0, 6.3, 2.4$  Hz, 1H), 2.32 (ddd,  $J = 15.1, 8.8, 6.2$  Hz, 1H), 2.23 (dt,  $J = 13.4, 8.1$  Hz, 1H), 1.94 (dt,  $J = 13.7, 6.9$  Hz, 1H).

$^{13}\text{C}$  NMR (100 MHz,  $\text{CDCl}_3$ )  $\delta$  179.6, 177.3, 85.5, 43.5, 38.8, 36.9, 35.9, 35.1.

HRMS (ESI-TOF) Calculated for  $\text{C}_8\text{H}_9\text{O}_4$   $[\text{M}-\text{H}]^-$ : 169.0501, Found: 169.0499.

The relative configuration of **25b** was determined from its reduced analogue **25b'** through treatment with  $\text{BH}_3 \cdot \text{THF}$ .

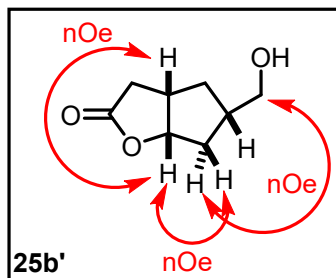

Compound **25b** (50.0 mg, 0.30 mmol) was dissolved in anhydrous THF (2.0 mL), the reaction mixture was cooled to 0 °C and a solution of  $\text{BH}_3 \cdot \text{THF}$  (0.9 mL, 0.9 mmol, 1.0 M in THF) was added. The reaction was gradually warmed to room temperature and stirred overnight. TLC analysis at this stage suggested completion of reaction. The reaction was quenched by addition of MeOH and all the volatiles were removed under reduced pressure. The desired compound was then purified by flash column chromatography (100% EA,  $R_f = 0.4$ ) and obtained as a colourless liquid (45.0 mg, 0.29 mmol, 97%).

$^1\text{H}$  NMR (500 MHz,  $\text{CDCl}_3$ )  $\delta$  4.93 (td,  $J = 6.8, 3.5$  Hz, 1H), 3.68 – 3.48 (m, 2H), 2.84 – 2.77 (m, 1H), 2.73 (dd,  $J = 17.6, 9.1$  Hz, 1H), 2.36 (dd,  $J = 17.6, 1.5$  Hz, 1H), 2.32 – 2.21 (m, 1H), 2.22 – 2.12 (m, 3H), 1.67 (ddd,  $J = 14.1, 8.6, 3.5$  Hz, 1H), 1.27 – 1.14 (m, 1H).

$^{13}\text{C}$  NMR (126 MHz,  $\text{CDCl}_3$ )  $\delta$  177.5, 86.2, 65.8, 42.3, 39.4, 35.8, 35.7, 35.7.

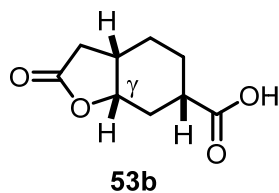

### (3*aS*\*,6*S*\*,7*aS*\*)-2-Oxo-octahydrobenzofuran-6-carboxylic acid **53b**

Following the general procedure for its synthesis, the compound was purified as the acid by column chromatography (General procedure for gradient elution: begin with 20% EtOAc/hexane + 1% AcOH, and increase the composition of EtOAc by 10% for every 8 mL of eluent used to 100% EtOAc + 1% AcOH). Isolated yield 60% based on reactive diastereomers\* (7.6 mg, 0.042 mmol, off white solid).

$^1\text{H}$  NMR (500 MHz,  $\text{CDCl}_3$ )  $\delta$  4.57 (dt,  $J = 8.9, 6.0$  Hz, 1H), 2.75 – 2.59 (m, 1H), 2.47 (dd,  $J = 17.2, 7.8$  Hz, 1H), 2.44 – 2.37 (m, 2H), 2.29 (dddd,  $J = 13.9, 5.5, 4.0, 1.4$  Hz, 1H), 1.90 – 1.85 (m, 1H), 1.85 – 1.78 (m, 2H), 1.75 – 1.66 (m, 2H).

$^{13}\text{C}$  NMR (126 MHz,  $\text{CDCl}_3$ )  $\delta$  179.3, 176.6, 78.0, 38.3, 34.0, 32.8, 30.2, 24.1, 22.9.

HRMS (ESI-TOF) Calculated for  $\text{C}_9\text{H}_{11}\text{O}_4$   $[\text{M}-\text{H}]^-$ : 183.0657, Found: 183.0660.

\*It was observed that only the *syn*-diacid of **53** provided the lactone **53b**, whereas the *anti*-diacid of **53** was not reactive.

The relative configuration of **53b** was determined from its benzyl ester analogue **53b'**, the synthesis of benzyl ester **51b'** was carried out according to the general procedure as described above.

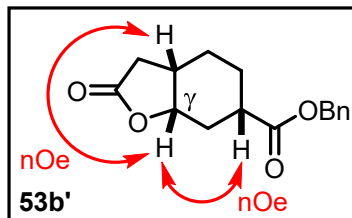

$^1\text{H}$  NMR (500 MHz,  $\text{CDCl}_3$ )  $\delta$  7.40 – 7.30 (m, 5H), 5.13 (s, 2H), 4.55 (ddd,  $J = 9.3, 6.2, 5.0$  Hz, 1H), 2.70 – 2.62 (m, 1H), 2.46 – 2.39 (m, 2H), 2.41 – 2.36 (m, 1H), 2.30 (dt,  $J = 13.8, 5.0$  Hz, 1H), 1.91 – 1.84 (m, 1H), 1.84 – 1.79 (m, 1H), 1.79 – 1.74 (m, 1H), 1.74 – 1.63 (m, 2H).

$^{13}\text{C}$  NMR (126 MHz,  $\text{CDCl}_3$ )  $\delta$  176.5, 173.8, 135.9, 128.8, 128.5, 128.4, 78.1, 66.8, 38.8, 34.1, 32.5, 30.6, 24.2, 23.1.

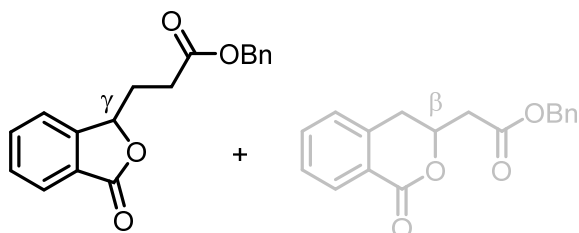

**32b:32a** = 10:1

### Benzyl 3-(3-oxo-1,3-dihydroisobenzofuran-1-yl)propanoate **32b**

Following the general procedure for its synthesis and benzyl ester formation, the compound was purified as the benzyl ester by pTLC (20% EA/hexanes,  $R_f = 0.30$ ). Isolated yield 57% over 2 steps, (16.9 mg, 0.057 mmol, off white solid, **32b:32a** = 10:1 by  $^1\text{H}$  NMR).

$^1\text{H}$  NMR (500 MHz,  $\text{CDCl}_3$ )  $\delta$  7.90 (d,  $J = 7.5$  Hz, 1H), 7.68 (td,  $J = 7.5, 1.0$  Hz, 1H), 7.54 (t,  $J = 7.5$  Hz, 1H), 7.46 (dd,  $J = 7.5, 1.0$  Hz, 1H), 7.39 – 7.30 (m, 5H), 5.55 (dd,  $J = 8.7, 2.8$  Hz, 1H), 5.12 (s, 2H), 2.70 – 2.57 (m, 1H), 2.57 – 2.44 (m, 2H), 2.08 – 1.91 (m, 1H).

$^{13}\text{C}$  NMR (126 MHz,  $\text{CDCl}_3$ )  $\delta$  172.6, 170.3, 149.3, 135.8, 134.3, 129.5, 128.8, 128.5, 128.4, 126.2, 126.0, 122.0, 80.1, 66.7, 30.0, 29.6.

HRMS (ESI-TOF) Calculated for  $\text{C}_{18}\text{H}_{17}\text{O}_4$   $[\text{M}+\text{H}]^+$ : 297.1127, Found: 297.1129.

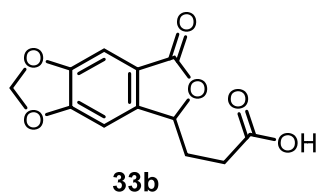

### 3-(7-Oxo-5,7-dihydro-[1,3]dioxolo[4,5-f]isobenzofuran-5-yl)propanoic acid **33b**

Following the general procedure for its synthesis, the compound was purified by pTLC (50% EA/hexanes, 2% AcOH). Isolated yield 75% (18.7 mg, 0.075 mmol, off white solid).

$^1\text{H}$  NMR (600 MHz, DMSO- $d_6$ )  $\delta$  7.24 – 7.21 (m, 2H), 6.21 (dd,  $J$  = 3.5, 1.0 Hz, 2H), 5.49 (dd,  $J$  = 7.5, 3.9 Hz, 1H), 2.37 – 2.27 (m, 2H), 2.27 – 2.18 (m, 1H), 1.89 – 1.80 (m, 1H).

$^{13}\text{C}$  NMR (151 MHz, DMSO- $d_6$ )  $\delta$  173.6, 169.2, 153.5, 149.1, 146.4, 118.7, 103.3, 102.9, 102.4, 79.4, 29.3, 29.1.

HRMS (ESI-TOF) Calculated for  $\text{C}_{12}\text{H}_{10}\text{O}_6\text{Na}$   $[\text{M}+\text{Na}]^+$ : 273.0375, Found: 273.0384.

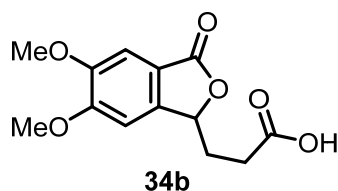

### 3-(5,6-Dimethoxy-3-oxo-1,3-dihydroisobenzofuran-1-yl)propanoic acid **34b**

Following the general procedure for its synthesis, the compound was purified by pTLC (50% EA/hexanes, 2% AcOH). Isolated yield 61% (16.2 mg, 0.061 mmol, off white solid).

$^1\text{H}$  NMR (600 MHz,  $\text{CD}_3\text{OD}$ )  $\delta$  7.29 (s, 1H), 7.14 (d,  $J$  = 0.8 Hz, 1H), 5.54 – 5.49 (m, 1H), 3.96 (s, 3H), 3.90 (s, 3H), 2.53 – 2.35 (m, 3H), 2.03 – 1.94 (m, 1H).

$^{13}\text{C}$  NMR (151 MHz,  $\text{CD}_3\text{OD}$ )  $\delta$  174.9, 172.8, 156.9, 152.3, 145.8, 118.6, 106.9, 105.2, 81.5, 56.9, 56.7, 30.8, 30.0.

HRMS (ESI-TOF) Calculated for  $\text{C}_{13}\text{H}_{15}\text{O}_6$   $[\text{M}+\text{H}]^+$ : 267.0869, Found: 267.0865.

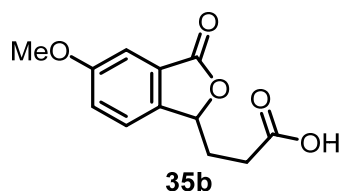

### 3-(5-Methoxy-3-oxo-1,3-dihydroisobenzofuran-1-yl)propanoic acid **35b**

Following the general procedure for its synthesis, the compound was purified by pTLC (50% EA/hexanes, 2% AcOH). Isolated yield 70% (16.5 mg, 0.07 mmol, off white solid).

$^1\text{H}$  NMR (600 MHz,  $\text{CD}_3\text{OD}$ )  $\delta$  7.53 – 7.48 (m, 1H), 7.35 – 7.30 (m, 2H), 5.57 (dd,  $J$  = 8.0, 3.3 Hz, 1H), 3.88 (s, 3H), 2.50 – 2.34 (m, 3H), 2.00 – 1.90 (m, 1H).

$^{13}\text{C}$  NMR (151 MHz,  $\text{CD}_3\text{OD}$ )  $\delta$  176.9, 172.4, 162.4, 143.5, 128.4, 124.4, 124.0, 108.5, 82.1, 56.3, 31.3, 30.6.

HRMS (ESI-TOF) Calculated for  $\text{C}_{12}\text{H}_{13}\text{O}_5$   $[\text{M}+\text{H}]^+$ : 237.0763, Found: 237.0762.

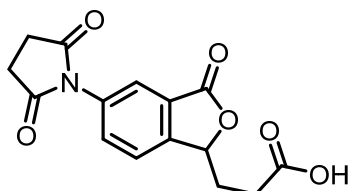

**36b**

### **3-(6-(2,5-Dioxopyrrolidin-1-yl)-3-oxo-1,3-dihydroisobenzofuran-1-yl)propanoic acid 36b**

Following the general procedure for its synthesis, the compound was purified by pTLC (70% EA/hexanes, 2% AcOH). Isolated yield 50% (15.1 mg, 0.050 mmol, off white solid, **36b:36a** = 5:1 by  $^1\text{H}$  NMR).

$^1\text{H}$  NMR (600 MHz,  $\text{CD}_3\text{OD}$ )  $\delta$  7.83 (dd,  $J$  = 1.8, 0.7 Hz, 1H), 7.76 – 7.68 (m, 2H), 5.69 (dd,  $J$  = 8.4, 3.0 Hz, 1H), 2.89 (s, 4H), 2.56 – 2.39 (m, 3H), 2.02 – 1.98 (m, 1H).

$^{13}\text{C}$  NMR (151 MHz,  $\text{CD}_3\text{OD}$ )  $\delta$  178.6, 176.2, 171.3, 150.7, 135.2, 134.2, 127.9, 124.9, 124.2, 82.2, 30.9, 30.3, 29.5.

HRMS (ESI-TOF) Calculated for  $\text{C}_{15}\text{H}_{14}\text{NO}_6$   $[\text{M}+\text{H}]^+$ : 304.0821, Found: 304.0824.

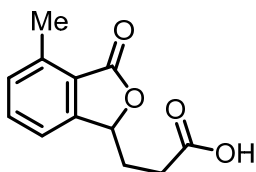

**37b**

### **3-(4-Methyl-3-oxo-1,3-dihydroisobenzofuran-1-yl)propanoic acid 37b**

Following the general procedure for its synthesis, the compound was purified by pTLC (50% EA/hexanes, 2% AcOH). Isolated yield 73% (16.0 mg, 0.073 mmol, off white solid, **37b:37a** = 8:1 by  $^1\text{H}$  NMR).

$^1\text{H}$  NMR (600 MHz,  $\text{CDCl}_3$ )  $\delta$  7.53 (t,  $J$  = 7.6 Hz, 1H), 7.30 – 7.24 (m, 2H), 5.48 (dd,  $J$  = 8.5, 3.2 Hz, 1H), 2.68 (s, 3H), 2.67 – 2.58 (m, 1H), 2.54 – 2.41 (m, 2H), 2.00 – 1.92 (m, 1H).

$^{13}\text{C}$  NMR (151 MHz,  $\text{CDCl}_3$ )  $\delta$  178.1, 170.6, 149.7, 140.1, 134.1, 131.2, 123.6, 119.2, 79.0, 29.9, 29.3, 17.5.

HRMS (ESI-TOF) Calculated for  $\text{C}_{12}\text{H}_{13}\text{O}_4$   $[\text{M}+\text{H}]^+$ : 221.0814, Found: 221.0814.

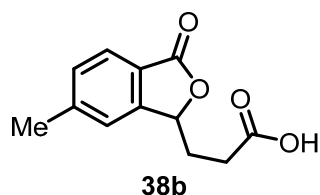

### 3-(6-Methyl-3-oxo-1,3-dihydroisobenzofuran-1-yl)propanoic acid **38b**

Following the general procedure for its synthesis, the compound was purified by pTLC (50% EA/hexanes, 2% AcOH). Isolated yield 55% (12.1 mg, 0.055 mmol, off white solid, **38b:38a** = 9:1 by <sup>1</sup>H NMR).

<sup>1</sup>H NMR (600 MHz, CDCl<sub>3</sub>) δ 7.77 (d, *J* = 7.8 Hz, 1H), 7.33 (d, *J* = 7.8 Hz, 1H), 7.25 (s, 2H), 5.50 (dd, *J* = 8.6, 3.1 Hz, 1H), 2.64 – 2.57 (m, 1H), 2.53 – 2.41 (m, 5H), 2.01 – 1.92 (m, 1H).

<sup>13</sup>C NMR (151 MHz, CDCl<sub>3</sub>) δ 177.4, 170.5, 149.8, 145.7, 130.7, 125.8, 123.6, 122.3, 79.8, 29.9, 29.4, 22.2.

HRMS (ESI-TOF) Calculated for C<sub>12</sub>H<sub>13</sub>O<sub>4</sub> [M+H]<sup>+</sup>: 221.0814, Found: 221.0813.

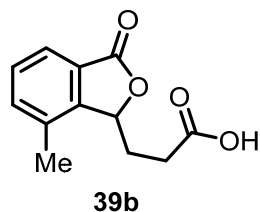

### 3-(7-Methyl-3-oxo-1,3-dihydroisobenzofuran-1-yl)propanoic acid **39b**

Following the general procedure for its synthesis, the compound was purified by pTLC (50% EA/hexanes, 2% AcOH). Isolated yield 60% (13.2 mg, 0.055 mmol, off white solid, **39b:39a** = 1.6:1 by <sup>1</sup>H NMR).

<sup>1</sup>H NMR (600 MHz, CDCl<sub>3</sub>) δ 7.73 (dd, *J* = 6.5, 2.3 Hz, 1H), 7.47 – 7.41 (m, 2H), 5.59 (dd, *J* = 8.6, 2.5 Hz, 1H), 2.67 – 2.57 (m, 2H), 2.51 – 2.44 (m, 1H), 2.43 (s, 3H), 1.96 – 1.87 (m, 1H).

<sup>13</sup>C NMR (151 MHz, CDCl<sub>3</sub>) δ 177.5, 170.7, 147.5, 135.8, 132.7, 129.8, 126.1, 123.5, 79.9, 29.3, 28.4, 18.2.

HRMS (ESI-TOF) Calculated for C<sub>12</sub>H<sub>13</sub>O<sub>4</sub> [M+H]<sup>+</sup>: 221.0814, Found: 221.0816.



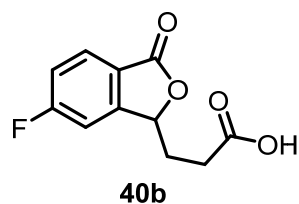

### 3-(6-Fluoro-3-oxo-1,3-dihydroisobenzofuran-1-yl)propanoic acid **40b**

Following the general procedure for its synthesis, the compound was purified by pTLC (50% EA/hexanes, 2% AcOH). Isolated yield 68% (15.2 mg, 0.068 mmol, off white solid, **40b:40a** = 10:1 by  $^1\text{H}$  NMR).

$^1\text{H}$  NMR (600 MHz,  $\text{CDCl}_3$ )  $\delta$  7.90 (dd,  $J = 8.5, 4.8$  Hz, 1H), 7.24 (td,  $J = 8.5, 2.1$  Hz, 1H), 7.16 (dd,  $J = 7.6, 2.4$  Hz, 1H), 5.54 (dd,  $J = 8.6, 3.5$  Hz, 1H), 2.69 – 2.61 (m, 1H), 2.55 – 2.50 (m, 1H), 2.50 – 2.42 (m, 1H), 2.03 – 1.94 (m, 1H).

$^{13}\text{C}$  NMR (151 MHz,  $\text{CDCl}_3$ )  $\delta$  177.5, 169.1, 167.6, 165.9, 152.0 (d,  $J = 10.4$  Hz), 128.5 (d,  $J = 10.1$  Hz), 117.9 (d,  $J = 23.8$  Hz), 109.4 (d,  $J = 24.3$  Hz), 79.3 (d,  $J = 2.8$  Hz), 29.7, 29.2.

$^{19}\text{F}$  NMR (471 MHz,  $\text{CDCl}_3$ )  $\delta$  -105.19.

HRMS (ESI-TOF) Calculated for  $\text{C}_{11}\text{H}_{10}\text{FO}_4$   $[\text{M}+\text{H}]^+$ : 225.0563, Found: 225.0559.

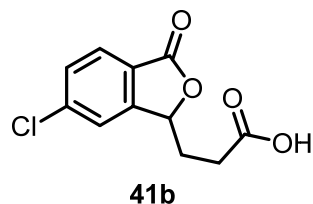

### 3-(6-Chloro-3-oxo-1,3-dihydroisobenzofuran-1-yl)propanoic acid **41b**

Following the general procedure for its synthesis, the compound was purified by pTLC (50% EA/hexanes, 2% AcOH). Isolated yield 42% (10.1 mg, 0.042 mmol, off white solid, **41b:41a** = 5:1 by  $^1\text{H}$  NMR).

$^1\text{H}$  NMR (600 MHz,  $\text{CDCl}_3$ )  $\delta$  7.84 (d,  $J = 8.1$  Hz, 1H), 7.53 (dd,  $J = 8.2, 1.7$  Hz, 1H), 7.49 – 7.47 (m, 1H), 5.54 (dd,  $J = 8.8, 3.4$  Hz, 1H), 2.70 – 2.61 (m, 1H), 2.58 – 2.43 (m, 2H), 2.03 – 1.94 (m, 1H).

$^{13}\text{C}$  NMR (151 MHz,  $\text{CDCl}_3$ )  $\delta$  174.8, 169.2, 150.8, 141.2, 130.4, 127.3, 124.7, 122.5, 79.4, 29.7, 29.2.

HRMS (ESI-TOF) Calculated for  $\text{C}_{11}\text{H}_{10}\text{ClO}_4$   $[\text{M}+\text{H}]^+$ : 241.0268, Found: 241.0268.

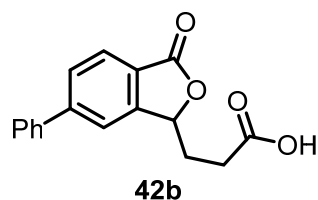

### 3-(3-Oxo-6-phenyl-1,3-dihydroisobenzofuran-1-yl)propanoic acid **42b**

Following the general procedure for its synthesis, the compound was purified by pTLC (50% EA/hexanes, 2% AcOH). Isolated yield 50% (14.1 mg, 0.05 mmol, off white solid, **42b:42a** = 16:1 by  $^1\text{H}$  NMR).

$^1\text{H}$  NMR (600 MHz,  $\text{CDCl}_3$ )  $\delta$  7.95 (d,  $J$  = 7.9 Hz, 1H), 7.75 (dd,  $J$  = 8.0, 1.4 Hz, 1H), 7.65 – 7.59 (m, 3H), 7.52 – 7.49 (m, 2H), 7.49 – 7.41 (m, 2H), 5.60 (dd,  $J$  = 8.0, 2.1 Hz, 1H), 2.69 – 2.61 (m, 1H), 2.58 – 2.50 (m, 2H), 2.09 – 1.99 (m, 1H).

$^{13}\text{C}$  NMR (151 MHz,  $\text{CDCl}_3$ )  $\delta$  177.1, 170.3, 150.1, 147.9, 139.7, 129.3, 128.9, 128.9, 127.69, 126.4, 124.9, 120.5, 80.0, 29.9, 29.3.

HRMS (ESI-TOF) Calculated for  $\text{C}_{17}\text{H}_{15}\text{O}_4$   $[\text{M}+\text{H}]^+$ : 283.0970, Found: 283.0964.

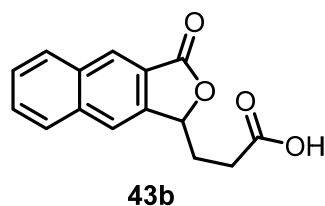

### 3-(3-Oxo-1,3-dihydronaphtho[2,3-*c*]furan-1-yl)propanoic acid **43b**

Following the general procedure for its synthesis, the compound was purified by pTLC (50% EA/hexanes, 2% AcOH). Isolated yield 60% (15.4 mg, 0.06 mmol, off white solid, **43b:43a** = 10:1 by  $^1\text{H}$  NMR).

$^1\text{H}$  NMR (600 MHz,  $\text{CD}_3\text{OD}$ )  $\delta$  8.43 (s, 1H), 8.08 (dd,  $J$  = 8.3, 1.2 Hz, 1H), 8.07 – 8.00 (m, 2H), 7.67 (ddd,  $J$  = 8.2, 6.8, 1.3 Hz, 1H), 7.60 (ddd,  $J$  = 8.2, 6.8, 1.2 Hz, 1H), 5.76 (dd,  $J$  = 8.4, 3.4 Hz, 1H), 2.60 – 2.48 (m, 2H), 2.48 – 2.37 (m, 1H), 2.13 – 1.96 (m, 1H).

$^{13}\text{C}$  NMR (151 MHz,  $\text{CD}_3\text{OD}$ )  $\delta$  176.6, 172.2, 144.6, 137.9, 134.7, 130.9, 130.2, 129.5, 128.2, 127.7, 124.8, 122.3, 82.2, 31.7, 30.5.

HRMS (ESI-TOF) Calculated for  $\text{C}_{15}\text{H}_{13}\text{O}_4$   $[\text{M}+\text{H}]^+$ : 257.0814, Found: 257.0814.

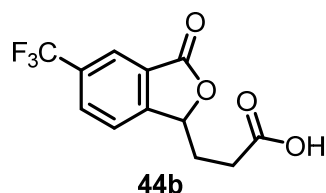

### 3-(3-Oxo-5-(trifluoromethyl)-1,3-dihydroisobenzofuran-1-yl)propanoic acid **44b**

Following the general procedure for its synthesis, the compound was purified by pTLC (50% EA/hexanes, 2% AcOH). Isolated yield 40% (10.1 mg, 0.04 mmol, off white solid).

$^1\text{H}$  NMR (600 MHz,  $\text{CD}_3\text{OD}$ )  $\delta$  8.15 (s, 1H), 8.07 (dd,  $J = 8.4, 1.5$  Hz, 1H), 7.89 – 7.84 (m, 1H), 5.75 (dd,  $J = 8.4, 3.1$  Hz, 1H), 2.57 – 2.48 (m, 2H), 2.48 – 2.40 (m, 1H), 2.07 – 1.97 (m, 1H).

$^{13}\text{C}$  NMR (151 MHz,  $\text{CD}_3\text{OD}$ )  $\delta$  176.4, 170.6, 154.7, 133.1 (q,  $J = 33.0$  Hz), 132.3 (q,  $J = 3.3$  Hz), 128.2, 125.1 (d,  $J = 271.8$  Hz), 123.5 (q,  $J = 4.1$  Hz), 125.0, 82.3, 30.8, 30.5.

$^{19}\text{F}$  NMR (376 MHz,  $\text{CD}_3\text{OD}$ )  $\delta$  -66.59.

HRMS (ESI-TOF) Calculated for  $\text{C}_{12}\text{H}_{10}\text{F}_3\text{O}_4$   $[\text{M}+\text{H}]^+$ : 275.0531, Found: 275.0531.

## 2.7 Synthesis and characterization of substrates for the $\gamma$ -directed, $\gamma$ -C–H lactonization reaction

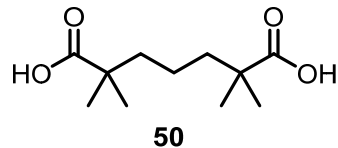

### 2,2,6,6-Tetramethylheptanedioic acid **50**

This compound is commercially available.

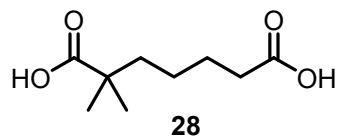

### 2,2-Dimethylheptanedioic acid **28**

Please see Section 2.4

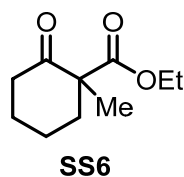

### Ethyl 1-methyl-2-oxocyclohexane-1-carboxylate SS6

This compound was prepared according to the general procedure B for the preparation of  $\beta$ -substituted heptanedioic acids with the reaction of MeI and ethyl 2-oxocyclohexane-1-carboxylate. 73% yield, (1.08 g, 5.86 mmol, colorless oil).

$^1\text{H}$  NMR (600 MHz,  $\text{CDCl}_3$ )  $\delta$  4.22 – 4.14 (m, 2H), 2.54 – 2.41 (m, 3H), 2.06 – 1.97 (m, 1H), 1.78 – 1.57 (m, 4H), 1.50 – 1.41 (m, 1H), 1.28 (s, 3H), 1.25 (t,  $J = 7.1$  Hz, 3H).

$^{13}\text{C}$  NMR (151 MHz,  $\text{CDCl}_3$ )  $\delta$  208.5, 173.2, 61.4, 57.3, 40.8, 38.4, 27.7, 22.8, 21.4, 14.2.

The data is consistent with those reported in the literature.<sup>(40)</sup>

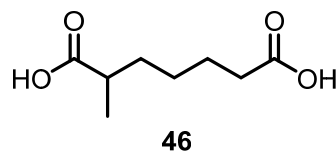

### 2-Methylheptanedioic acid 46

This compound was prepared according to the general procedure B for the preparation of  $\beta$ -substituted heptanedioic acids. 75% yield, (0.78 g, 4.5 mmol, white solid).

$^1\text{H}$  NMR (500 MHz, DMSO)  $\delta$  2.29 (h,  $J = 6.9$  Hz, 1H), 2.19 (t,  $J = 7.3$  Hz, 2H), 1.57 – 1.50 (m, 1H), 1.50 – 1.41 (m, 2H), 1.33 (dq,  $J = 15.7, 6.8$  Hz, 1H), 1.25 (qd,  $J = 7.6, 3.7$  Hz, 2H), 1.03 (d,  $J = 6.9$  Hz, 3H).

$^{13}\text{C}$  NMR (126 MHz, DMSO)  $\delta$  177.4, 174.4, 38.6, 33.6, 33.0, 26.3, 24.4, 17.0.

HRMS (ESI-TOF) Calculated for  $\text{C}_8\text{H}_{13}\text{O}_4$ ,  $[\text{M}-\text{H}]^-$ : 173.0814, found: 173.0811.

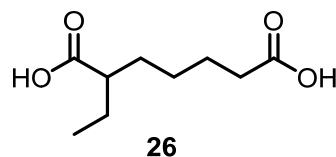

### 2-Ethylheptanedioic acid 26

Please see Section 2.4

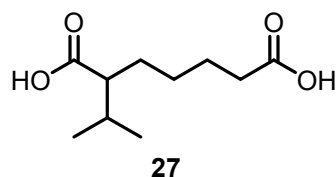

### 2-Isopropylheptanedioic acid 27

Please see Section 2.4

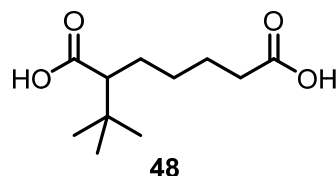

### 2-(*tert*-Butyl)heptanedioic acid 48

This compound was prepared according to the general procedure for the preparation of  $\alpha$ -substituted heptanedioic acids.

Elution condition: (20% EA/hexanes + 1% AcOH to 50% EA + 1% AcOH, gradient elution)

Isolated yield: 44% over 2 steps (0.95 g, 4.4 mmol, colourless oil)

$^1\text{H}$  NMR (500 MHz, DMSO)  $\delta$  11.97 (s, 2H), 2.18 (t,  $J = 7.4$  Hz, 2H), 1.97 (dd,  $J = 11.8, 2.9$  Hz, 1H), 1.55 – 1.43 (m, 3H), 1.39 (dddd,  $J = 12.8, 9.4, 6.3, 2.8$  Hz, 1H), 1.26 – 1.11 (m, 2H), 0.91 (s, 9H).

$^{13}\text{C}$  NMR (126 MHz, DMSO)  $\delta$  176.1, 174.4, 55.6, 33.6, 32.1, 27.7, 27.6, 26.9, 24.5.

HRMS (ESI-TOF) Calculated for  $\text{C}_{11}\text{H}_{19}\text{O}_4$  [ $\text{M}-\text{H}$ ] $^-$ : 215.1283, Found: 215.1281.

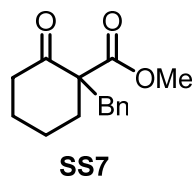

### Methyl 1-benzyl-2-oxocyclohexane-1-carboxylate SS7

This compound was prepared according to the general procedure B for the preparation of  $\alpha$ -substituted heptanedioic acids with the reaction of BnBr and methyl 2-oxocyclohexane-1-carboxylate. 95% yield, (1.87g, 7.6 mmol, white solid).

$^1\text{H}$  NMR (600 MHz,  $\text{CDCl}_3$ )  $\delta$  7.27 – 7.22 (m, 2H), 7.22 – 7.17 (m, 1H), 7.11 – 7.07 (m, 2H), 3.64 (s, 3H), 3.32 (d,  $J = 13.8$  Hz, 1H), 2.87 (d,  $J = 13.8$  Hz, 1H), 2.52 – 2.35 (m, 3H), 2.05 – 1.97 (m, 1H), 1.78 – 1.57 (m, 3H), 1.46 (ddd,  $J = 13.8, 12.1, 4.5$  Hz, 1H).

$^{13}\text{C}$  NMR (151 MHz,  $\text{CDCl}_3$ )  $\delta$  207.3, 171.6, 136.7, 130.4, 128.2, 126.8, 62.4, 52.3, 41.5, 40.6, 36.0, 27.7, 22.6.

The data is consistent with those reported in the literature.(44)

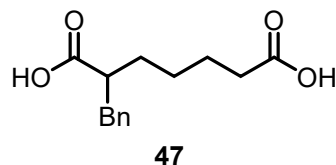

### 2-Benzylheptanedioic acid 47

This compound was prepared according to the general procedure B for the preparation of  $\alpha$ -substituted heptanedioic acids. 85% yield, (1.28 g, 5.1 mmol, white solid).

$^1\text{H}$  NMR (600 MHz,  $\text{CDCl}_3$ )  $\delta$  7.32 – 7.27 (m, 2H), 7.24 – 7.20 (m, 1H), 7.19 – 7.15 (m, 2H), 3.06 – 2.98 (m, 1H), 2.74 – 2.65 (m, 2H), 2.40 (ddd,  $J = 15.2, 8.1, 4.4$  Hz, 1H), 2.32 (ddd,  $J = 15.3, 8.6, 4.4$  Hz, 1H), 1.72 – 1.48 (m, 4H), 1.44 – 1.25 (m, 2H).

$^{13}\text{C}$  NMR (151 MHz,  $\text{CDCl}_3$ )  $\delta$  182.5, 180.7, 139.0, 129.0, 128.6, 126.6, 47.6, 38.4, 33.9, 31.5, 26.2, 24.7.

HRMS (ESI-TOF) Calculated for  $\text{C}_{14}\text{H}_{18}\text{O}_4\text{Na}$   $[\text{M}+\text{Na}]^+$ : 273.1103, Found: 273.1095.

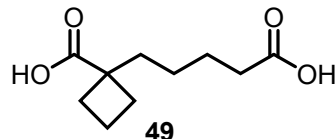

### 1-(4-Carboxybutyl)cyclobutane-1-carboxylic acid 49

This compound was prepared according to the general procedure for the preparation of  $\alpha$ -substituted heptanedioic acids.

Elution condition: (20% EA/hexanes + 1% AcOH to 50% EA/hexanes + 1% AcOH, gradient elution)

Isolated yield: 30% over 2 steps (0.60 g, 3.0 mmol, off-white solid)

$^1\text{H}$  NMR (500 MHz, DMSO)  $\delta$  12.01 (s, 2H), 2.27 (qd,  $J = 8.0, 4.4$  Hz, 2H), 2.19 (t,  $J = 7.3$  Hz, 2H), 1.89 – 1.71 (m, 4H), 1.71 – 1.63 (m, 2H), 1.47 (p,  $J = 7.5$  Hz, 2H), 1.20 – 1.07 (m, 2H).

$^{13}\text{C}$  NMR (126 MHz, DMSO)  $\delta$  177.9, 174.4, 46.9, 37.3, 33.6, 33.5, 29.5, 24.8, 24.1, 15.0.

HRMS (ESI-TOF) Calculated for  $\text{C}_{10}\text{H}_{15}\text{O}_4$   $[\text{M}-\text{H}]^-$ : 199.0970, Found: 199.0971.



### 3-Isopropylheptanedioic acid 30

Please see Section 2.4

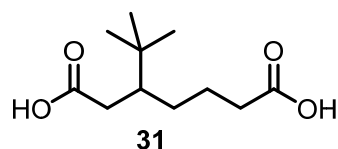

### 3-(*tert*-Butyl)heptanedioic acid 31

Please see Section 2.4

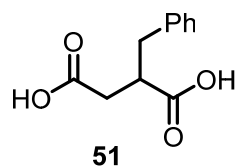

### 2-Benzylsuccinic acid 51

This compound is commercially available.

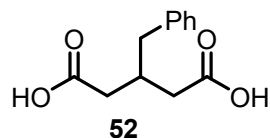

### 3-Benzylpentanedioic acid 52

This compound was prepared exactly according to the procedures published by Bonati and co-workers.<sup>(45)</sup>

<sup>1</sup>H NMR (500 MHz, DMSO)  $\delta$  12.15 (s, 2H), 7.36 – 7.26 (m, 2H), 7.24 – 7.18 (m, 1H), 7.18 – 7.12 (m, 2H), 2.60 (d,  $J$  = 6.9 Hz, 2H), 2.38 (p,  $J$  = 6.7 Hz, 1H), 2.26 – 2.14 (m, 4H).

<sup>13</sup>C NMR (126 MHz, DMSO)  $\delta$  173.5, 139.6, 129.1, 128.3, 126.1, 39.0, 37.2, 33.5.

HRMS (ESI-TOF) Calculated for C<sub>12</sub>H<sub>13</sub>O<sub>4</sub> [M-H]<sup>-</sup>: 221.0814, Found: 221.0815.

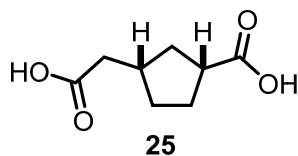

**(1*R*\*,3*S*\*)-3-(Carboxymethyl)cyclopentane-1-carboxylic acid 25**

Please see Section 2.4

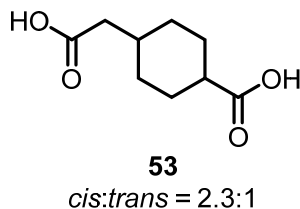

**4-(Carboxymethyl)cyclohexane-1-carboxylic acid 53**

This compound was prepared according to the following procedure.<sup>(43)</sup>

4-(Carboxymethyl)benzoic acid (0.3 g, 1.67 mmol) was dissolved in glacial acetic acid (15.0 mL) and PtO<sub>2</sub> (60.0 mg) was added. The reaction vessel was purged with H<sub>2</sub> and the hydrogenation reaction was carried out at room temperature with a balloon of H<sub>2</sub> and stirred for 3 days. Analysis of an aliquot of the reaction mixture at this point suggested completion of reaction. The reaction mixture was filtered with a plug of Celite® and the filtrate was evaporated to dryness to give the titled compound as a white solid in 93% yield (0.29 g, 1.56 mmol).

NMR for minor diastereomer: <sup>1</sup>H NMR (500 MHz, DMSO) δ 2.09 – 2.05 (m, 3H), 1.89 – 1.79 (m, 2H), 1.79 – 1.69 (m, 2H), 1.59 (ddt, *J* = 11.4, 7.7, 3.9 Hz, 1H), 1.28 (qd, *J* = 13.1, 3.4 Hz, 2H), 0.96 (qd, *J* = 13.0, 3.5 Hz, 2H).

<sup>13</sup>C NMR (126 MHz, DMSO) δ 176.7, 173.7, 42.3, 41.4, 33.7, 31.4, 28.5.

NMR for major diastereomer: <sup>1</sup>H NMR (500 MHz, DMSO) δ 2.43 (q, *J* = 4.9 Hz, 1H), 2.10 (d, *J* = 7.3 Hz, 2H), 1.89 – 1.79 (m, 2H), 1.79 – 1.69 (m, 1H), 1.55 – 1.50 (m, 2H), 1.47 (ddd, *J* = 13.9, 8.7, 4.5 Hz, 2H), 1.18 (dtd, *J* = 15.2, 11.0, 4.7 Hz, 2H).

<sup>13</sup>C NMR (126 MHz, DMSO) δ 176.1, 173.8, 39.9, 39.3, 32.4, 28.9, 25.7.

HRMS (ESI-TOF) Calculated for C<sub>9</sub>H<sub>13</sub>O<sub>4</sub> [M-H]<sup>-</sup>: 185.0814, Found: 185.0813.



## 2.8 Preliminary mechanistic studies

### 1. H/D exchange experiments – investigations of carboxylic acid directed $\gamma$ -methylene C–H activation

With Ligand L2:

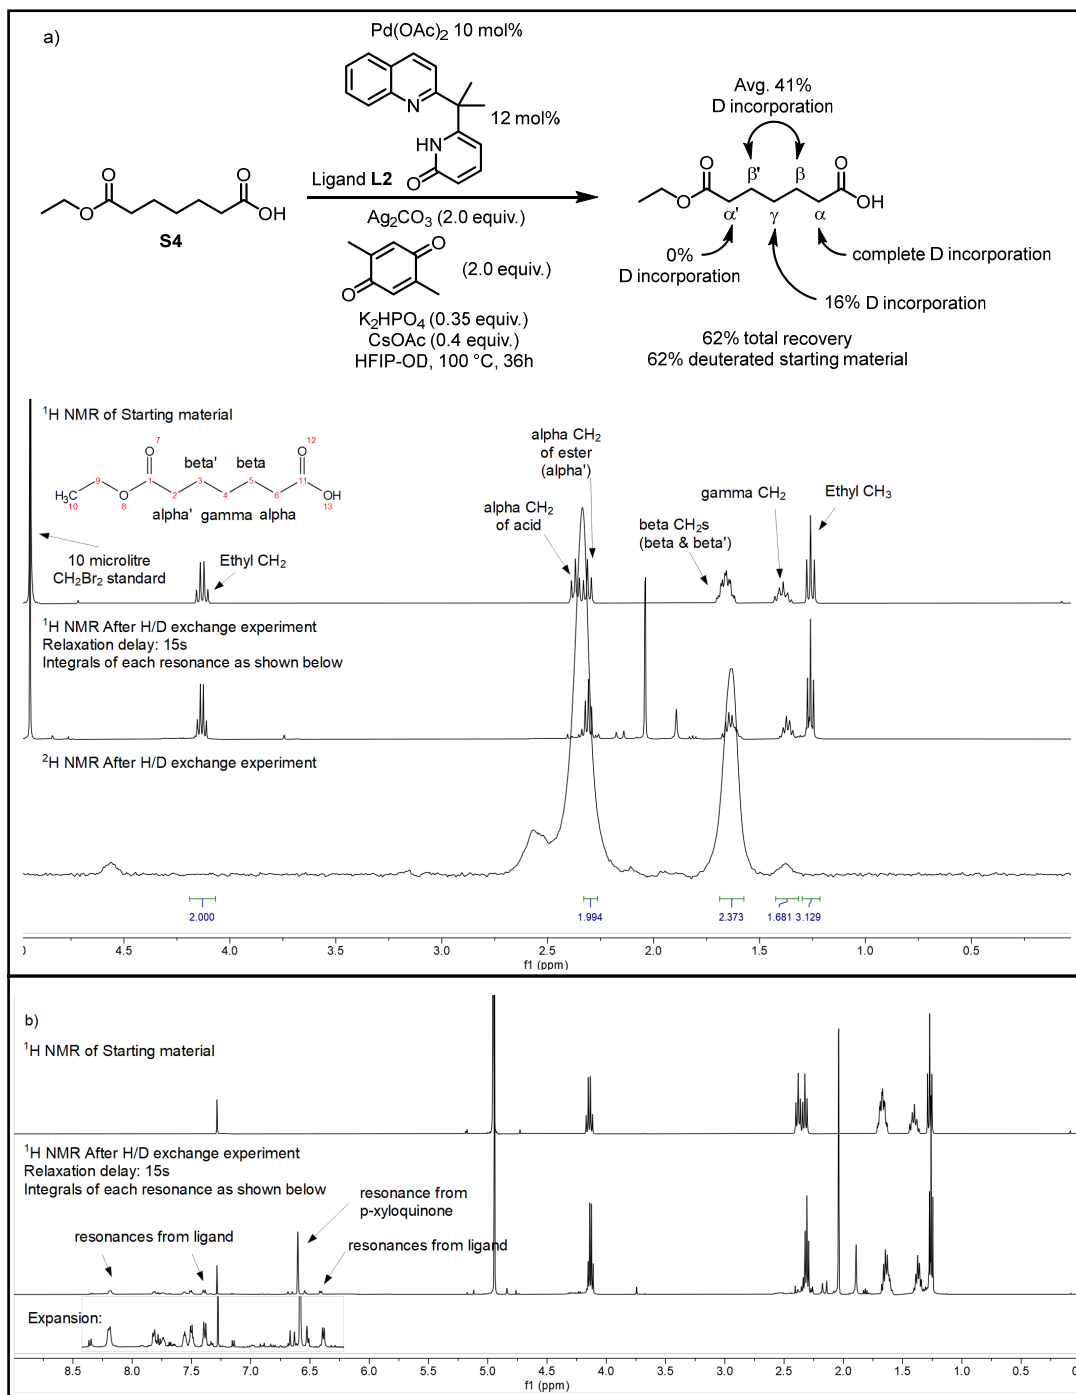

**Figure S1. a)** H/D exchange experiments – investigations of carboxylic acid directed  $\gamma$ -methylene C–H activation. **b)**  $^1\text{H}$  NMR spectra of monoethyl pimelate **S4** and the crude  $^1\text{H}$  NMR spectrum of the H/D exchange experiment, displayed from 0.0 ppm to 9.0 ppm, suggesting the absence of dehydrogenation products and the major recovered species is deuterated **S4**.

H/D exchange experiment with monoethyl pimelate **S4** under the stated reaction condition using ligand **L2** suggested that  $\gamma$ -methylene C–H activation is feasible. H/D exchange at the  $\alpha$ ,  $\beta$ , and  $\gamma$ -positions were all observed.

% Deuteration at  $\gamma$ -methylene CH<sub>2</sub> :  $[(1.681-2.000)/2.000] \times 100\% = 16\%$

The presence of deuterium at  $\gamma$ -methylene CH<sub>2</sub> is further supported by <sup>2</sup>H NMR spectroscopy.

% Deuteration at  $\beta$ -methylene CH<sub>2</sub>s (indistinguishable due to overlap of resonances) :

$[(2.373-4.000)/4.000] \times 100\% = 41\%$

% Deuteration at  $\alpha$ -methylene CH<sub>2</sub> of acid: NMR analysis suggests complete deuteration.

% Deuteration at  $\alpha$ -methylene CH<sub>2</sub> of ester: NMR analysis suggests no deuteration.

**Note:** Compound **S4** is commercially available.

## 2. Outcome of using monomethyl adipate **3** as substrate for $\gamma$ -lactonization via $\beta$ -C-H activation

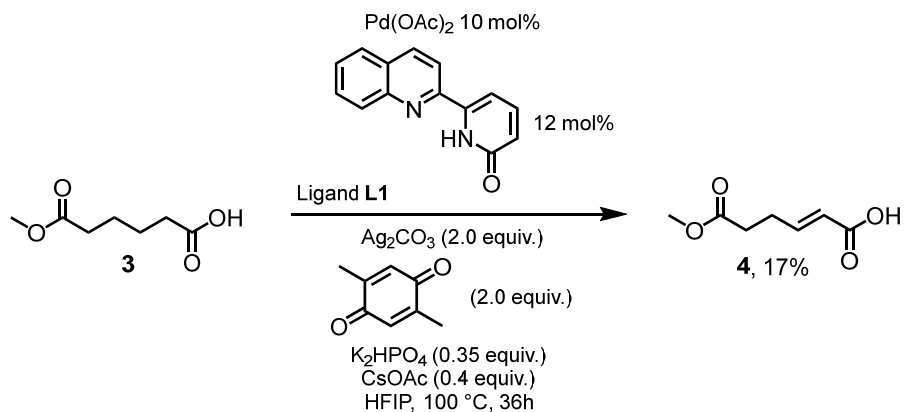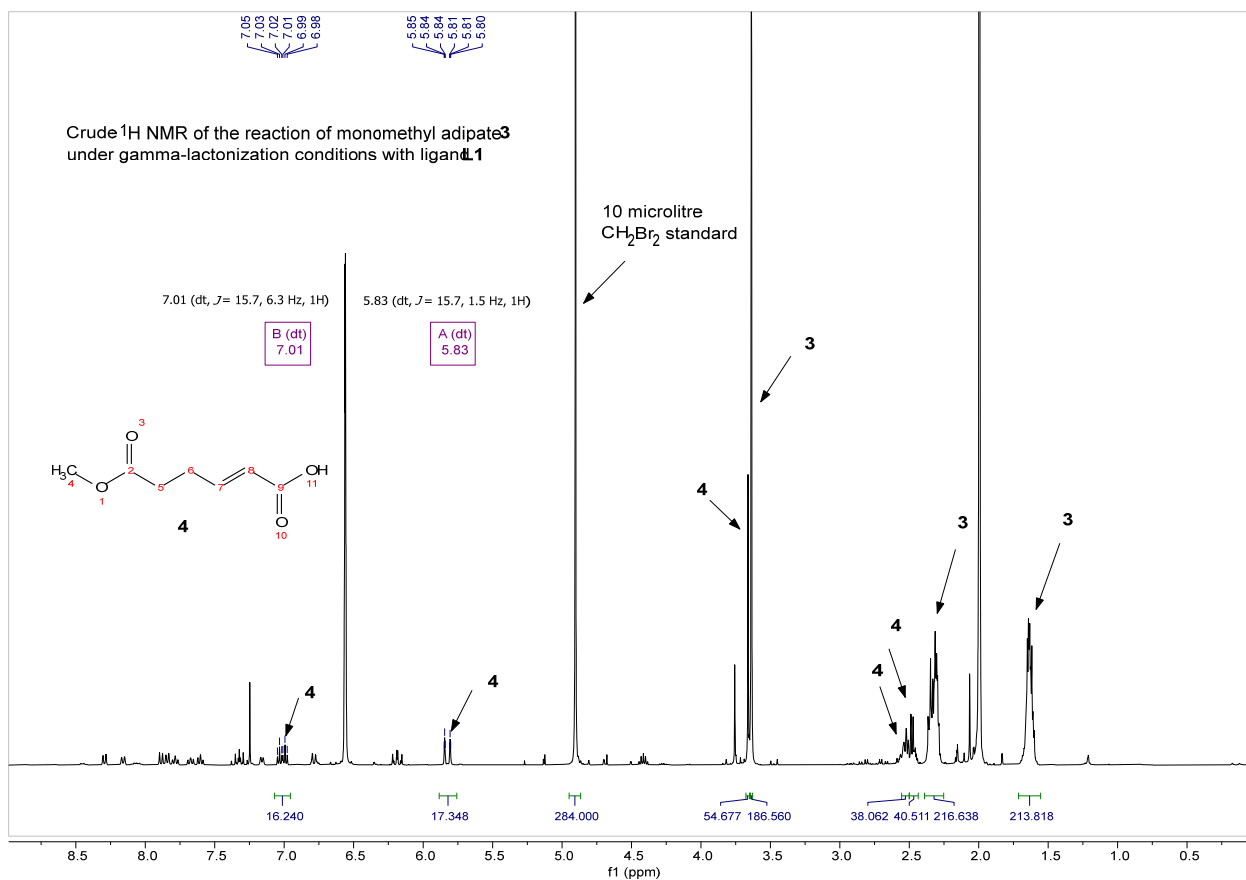

**Figure S2.** Reaction of monomethyl adipate **3** under  $\gamma$ -lactonization conditions with ligand **L1**.

## 2. Investigations on the mechanism of C–O bond formation. Are (*E*)-hex-2-enedioic acid **5** and (*E*)-hept-2-enedioic acid **S5** viable reaction intermediates?

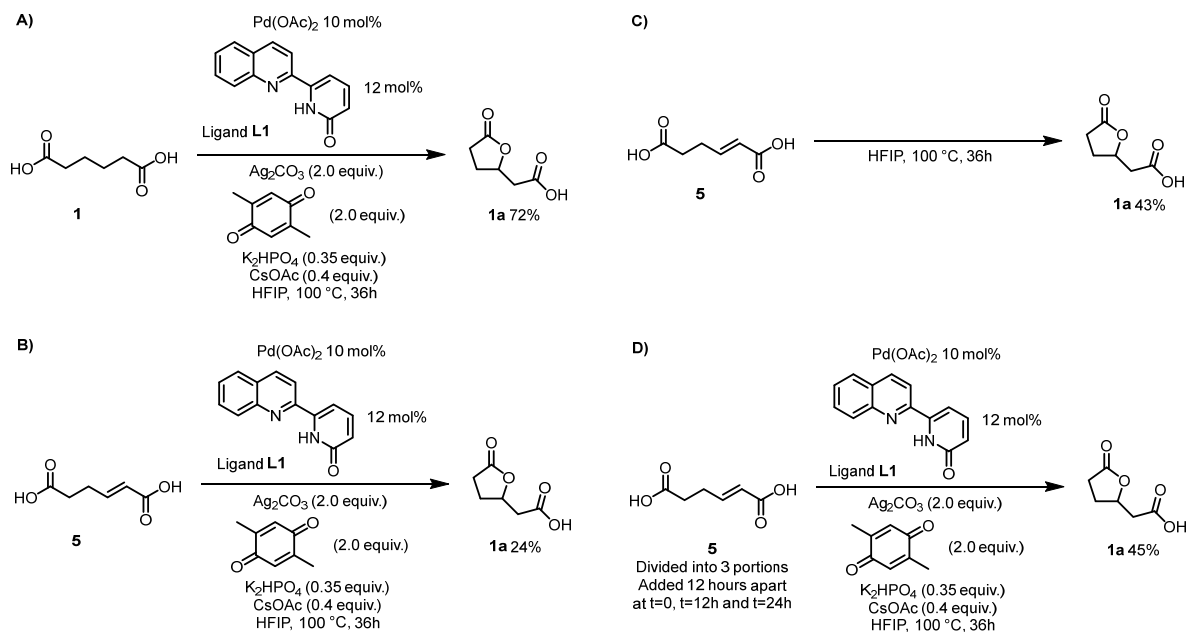

**Figure S3.** Investigations on the mechanism of C–O bond formation. Is (*E*)-hex-2-enedioic acid **5** a viable reaction intermediate?

Employing (*E*)-hex-2-enedioic acid **5** as the substrate under the lactonization reaction condition developed for adipic acid **1** gave only 24% yield of the expected lactone **1a**, as opposed to a 72% yield observed when adipic acid **1** was used as the substrate. Simply heating (*E*)-hex-2-enedioic acid **5** in HFIP at 100 °C for 36h gave the lactone product **1a** in 43% yield. Gradual addition of (*E*)-hex-2-enedioic acid **5** as the substrate in 3 portions, 12 hours apart, to the reaction mixture using the condition optimized for adipic acid **1** gave 45% yield of the lactone **1a**. These experiments suggest (*E*)-hex-2-enedioic acid **5** could be a viable intermediate for the lactonization reaction, and the C–O bond forming step could be an intramolecular conjugation addition process. However, the discrepancy in reaction yields also suggests that this intramolecular conjugation addition pathway may not be the only pathway possible for lactone formation. The existence of two simultaneous pathways for lactone formation is possible, one arising from intramolecular conjugate addition of (*E*)-hex-2-enedioic acid **5**, and another pathway for C–O bond formation arising from reductive elimination at palladium.

Compound **5** was synthesized according to the procedure below:

3-Oxohexanedicarboxylic acid dimethyl ester (1.0 g, 5.3 mmol) was dissolved in MeOH (10.0 mL) and NaBH<sub>4</sub> (200 mg, 5.3 mmol) was added. The reaction mixture was then stirred at room temperature for 1 hour. Aqueous NaOH solution (5.0 mL, 15% w/w) was added and the reaction mixture was stirred for 2 hours. The pH of the reaction mixture was then adjusted to 1 with aq. HCl (6.0 M), and the reaction mixture was concentrated under reduced pressure. Recrystallization of the crude with water gave the desired diacid **5** as a white solid (640 mg, 4.4 mmol, 83%).

<sup>1</sup>H NMR (500 MHz, DMSO) δ 12.18 (s, 2H), 6.81 (ddd, *J* = 15.6, 9.5, 3.6 Hz, 1H), 5.77 (d, *J* = 15.6 Hz, 1H), 2.39 (m, 4H).

<sup>13</sup>C NMR (126 MHz, DMSO) δ 173.6, 167.0, 147.4, 122.3, 32.0, 26.7.

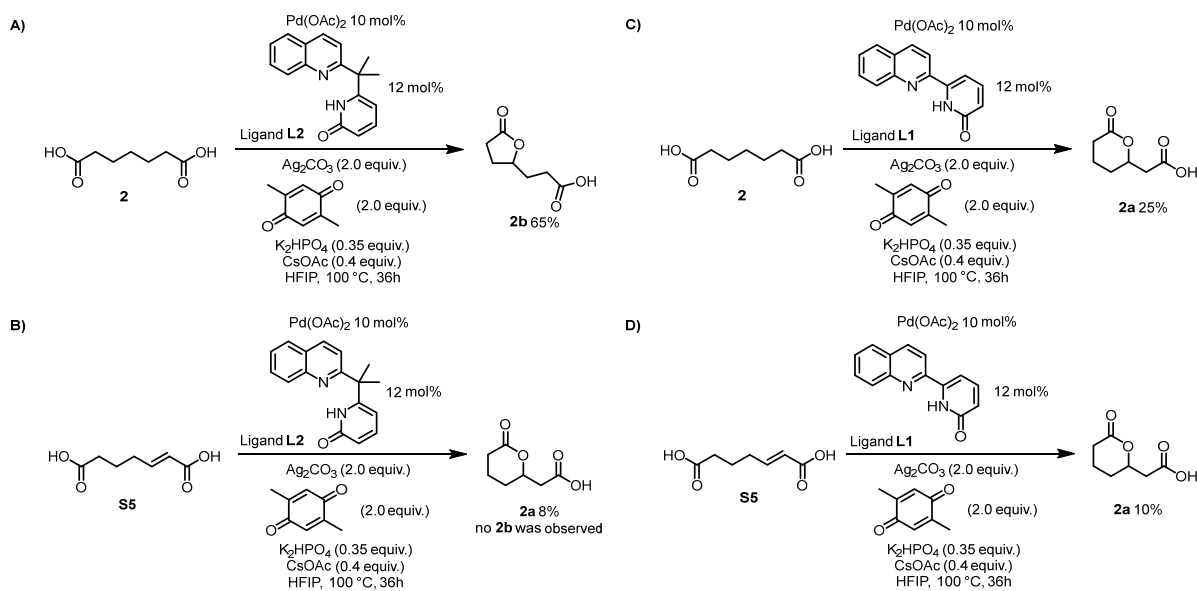

**Figure S4.** Investigations on the mechanism of C–O bond formation. Is (*E*)-hept-2-enedioic acid **S5** a viable reaction intermediate?

The use of (*E*)-hept-2-enedioic acid **S5** as the substrate with **L2** did not provide any of the  $\gamma$ -lactone **2b**, thus suggesting that (*E*)-hept-2-enedioic acid **S5** is not a viable intermediate for the formation of  $\gamma$ -lactone **2b**. Using (*E*)-hept-2-enedioic acid **S5** as the substrate with **L1** did provide the  $\delta$ -lactone **2a** in 10% yield, as opposed to the 25% yield obtained with pimelic acid **2** as the substrate. These results suggest that the most likely mechanism for the C–O bond formation in the generation of  $\gamma$ -lactone **2b** with **L2** does not involve (*E*)-hept-2-enedioic acid **S5** as an intermediate. Taking into account the results obtained from the H/D exchange experiments, the absence of other olefinic products suggests the most likely mechanism for C–O bond formation using ligand **L2** with pimelic acid is *via* reductive elimination at palladium. As for  $\delta$ -lactone formation using pimelic acid and ligand **L1**, the most likely mechanistic scenario would be similar to that described above for the formation of  $\gamma$ -lactone **1a** using adipic acid **1** and ligand **L1**, in which simultaneous existence of two reaction pathways is possible.

Compound **S5** was synthesized according to the procedure below:

3-Oxoheptanedicarboxylic acid diethyl ester (1.0 g, 4.3 mmol) was dissolved in MeOH (10.0 mL) and  $\text{NaBH}_4$  (163 mg, 4.3 mmol) was added. The reaction mixture was then stirred at room temperature for 1 hour. Aqueous NaOH solution (5.0 mL, 15% w/w) was added and the reaction mixture was stirred for 2 hours. The pH of the reaction mixture was then adjusted to 1 with aq. HCl (6.0 M), and the reaction mixture was concentrated under reduced pressure. Purification of the crude by flash column chromatography (30% EtOAc/hexane + 1% AcOH, then 50% EtOAc/hexane + 1% AcOH) gave the desired diacid **S5** as a white solid (241 mg, 1.52 mmol, 35%).

$^1\text{H}$  NMR (600 MHz, DMSO)  $\delta$  12.11 (s, 1H), 6.79 (dt,  $J = 15.6, 6.9$  Hz, 1H), 5.76 (dt,  $J = 15.6, 1.6$  Hz, 1H), 2.33 – 2.11 (m, 4H), 1.63 (p,  $J = 7.4$  Hz, 2H).

$^{13}\text{C}$  NMR (151 MHz, DMSO)  $\delta$  174.1, 167.0, 148.1, 122.3, 32.9, 30.7, 22.9.

### 3. Derivatization of lactone products

#### Total synthesis of myrotheciumone A

##### A Total synthesis of myrotheciumone A

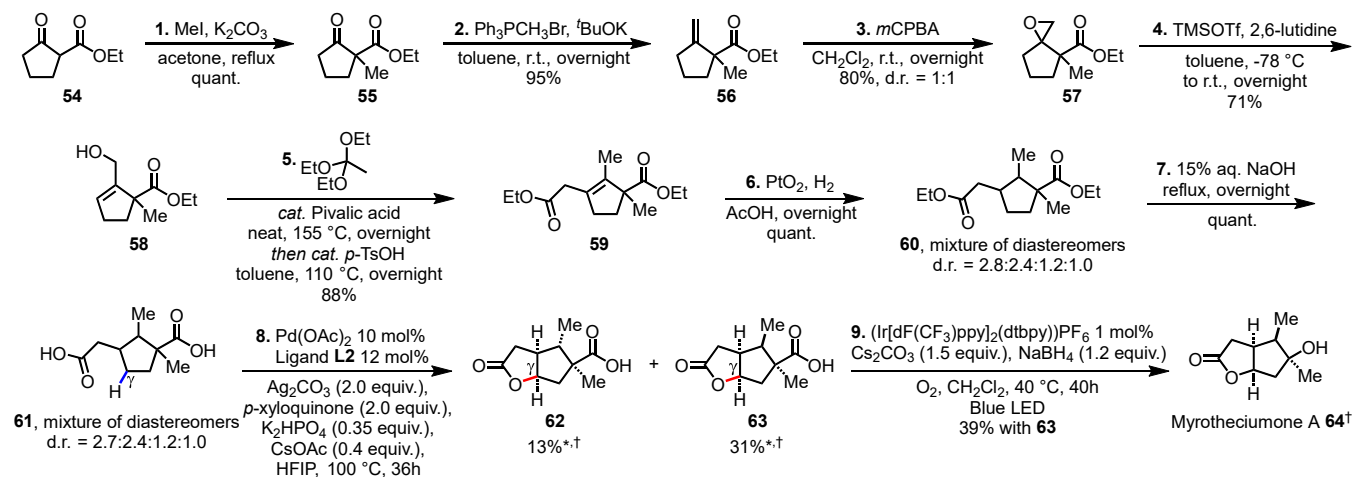

##### B Synthesis of pedicellosine

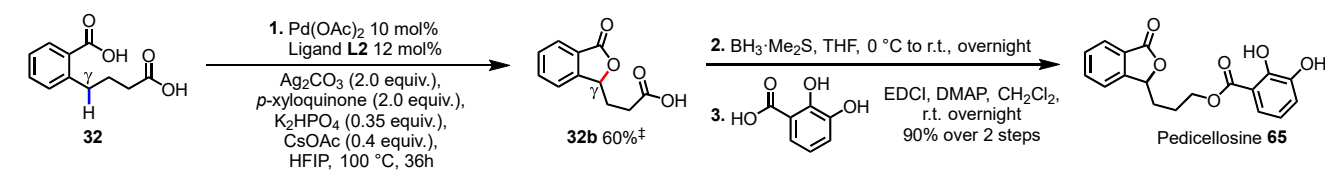

Figure S5. Total synthesis of myrotheciumone A and pedicellosine.

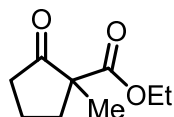

55

#### Ethyl 1-methyl-2-oxocyclopentane-1-carboxylate 55

Please see Section 2.4 for the synthesis of 55.

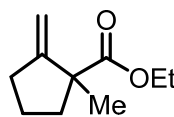

54

#### Ethyl 1-methyl-2-methylenecyclopentane-1-carboxylate 56

Ph<sub>3</sub>PCH<sub>3</sub>Br (9.2 g, 25.8 mmol) was suspended with *t*BuOK (2.4 g, 21.3 mmol) in dry toluene (44.0 mL) at room temperature. The reaction was stirred for 1 hour at this temperature followed by addition of a solution of compound 55 (1.5 g, 8.8 mmol) in dry toluene (5.0 mL). The reaction mixture was stirred overnight at room temperature. TLC analysis at this stage suggested completion of reaction. The reaction mixture was quenched with sat. aq. NH<sub>4</sub>Cl followed by extraction with EtOAc (three

times). The combined organic layer was dried with anhydrous  $\text{MgSO}_4$ , filtered, and concentrated under reduced pressure. The crude was purified by flash column chromatography on silica gel (3% EtOAc/hexane to 5% EtOAc/hexane) to give the desired product in 95% yield as a colourless oil (1.4 g, 8.4 mmol,  $R_f = 0.5$  (5% EtOAc/hexane)).

$^1\text{H}$  NMR (600 MHz,  $\text{CDCl}_3$ )  $\delta$  5.06 – 4.88 (m, 2H), 4.31 – 3.92 (m, 2H), 2.51 – 2.37 (m, 2H), 2.34 (dt,  $J = 13.2, 7.0$  Hz, 1H), 1.80 (dq,  $J = 13.5, 6.5$  Hz, 1H), 1.67 (td,  $J = 13.5, 7.3$  Hz, 1H), 1.58 (dd,  $J = 12.8, 6.5$  Hz, 1H), 1.32 (s, 3H), 1.28 – 1.16 (m, 3H).

$^{13}\text{C}$  NMR (151 MHz,  $\text{CDCl}_3$ )  $\delta$  176.5, 156.7, 106.9, 60.7, 52.4, 39.0, 33.8, 25.2, 24.0, 14.2.

HRMS (ESI-TOF) : Expected mass not observed.

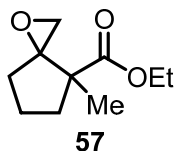

#### Ethyl 4-methyl-1-oxaspiro[2.4]heptane-4-carboxylate **57**

The compound **56** (1.0 g, 6.0 mmol) was dissolved in dry  $\text{CH}_2\text{Cl}_2$  and *m*CPBA (1.7 g, 75% purity, 7.4 mmol) was added. The reaction was stirred at room temperature overnight. TLC analysis at this stage suggested completion of reaction. The reaction mixture was quenched with sat. aq.  $\text{NaHCO}_3$  and sat. aq.  $\text{Na}_2\text{S}_2\text{O}_3$ , followed by extraction with EtOAc (three times). The combined organic layer was dried with anhydrous  $\text{MgSO}_4$ , filtered, and concentrated under reduced pressure. The crude was purified by flash column chromatography on silica gel (10% EtOAc/hexane to 20% EtOAc/hexane) to give the desired product in 80% yield as a colourless oil (0.88 g, 4.8 mmol, d.r. 1:1,  $R_f = 0.4$  (20% EtOAc/hexane)).

$^1\text{H}$  NMR (500 MHz,  $\text{CDCl}_3$ )  $\delta$  4.35 – 3.99 (m, 4H), 2.94 (d,  $J = 4.7$  Hz, 1H), 2.88 (d,  $J = 4.5$  Hz, 1H), 2.78 (d,  $J = 4.5$  Hz, 1H), 2.73 (d,  $J = 4.7$  Hz, 1H), 2.57 (dt,  $J = 12.6, 7.9$  Hz, 1H), 2.35 – 2.27 (m, 1H), 2.24 – 2.15 (m, 1H), 2.11 (tt,  $J = 11.2, 6.1$  Hz, 1H), 2.01 – 1.92 (m, 1H), 1.85 – 1.79 (m, 1H), 1.79 – 1.73 (m, 3H), 1.73 – 1.66 (m, 2H), 1.63 – 1.56 (m, 1H), 1.27 – 1.19 (m, 9H), 1.06 (s, 3H).

$^{13}\text{C}$  NMR (126 MHz,  $\text{CDCl}_3$ )  $\delta$  176.3, 173.5, 69.1, 67.6, 60.8, 60.8, 50.8, 50.6, 49.8, 49.7, 38.4, 36.4, 33.1, 32.1, 22.2, 22.0, 21.8, 18.1, 14.3.

HRMS (ESI-TOF) Calculated for  $\text{C}_{10}\text{H}_{17}\text{O}_3$ ,  $[\text{M}+\text{H}]^+$ : 185.1178, Found: 185.1175.

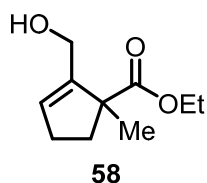

### Ethyl 2-(hydroxymethyl)-1-methylcyclopent-2-ene-1-carboxylate **58**

The compound **57** (0.65 g, 3.5 mmol) was dissolved in dry toluene (34.0 mL) and 2,6-lutidine (0.83 mL, 7.0 mmol) was added. The reaction mixture was then cooled to -78 °C. TMSOTf (1.28 mL, 7.0 mmol) was then added dropwise to the reaction mixture. The reaction mixture was gradually warmed to r.t. and stirred overnight. TLC analysis at this stage suggested completion of reaction. MeOH (10.0 mL) was added to the reaction mixture followed by aq. HCl (6.0 M, 3.0 mL) and stirred for 1 hour. TLC analysis at this stage suggested completion of reaction. The reaction mixture was neutralized with sat. aq. NaHCO<sub>3</sub> and extracted with EtOAc (three times). The combined organic layer was dried with anhydrous MgSO<sub>4</sub>, filtered, and concentrated under reduced pressure. The crude was purified by flash column chromatography on silica gel (30% EtOAc/hexane to 50% EtOAc/hexane) to give the desired product in 71% yield as a colourless oil (0.46 g, 2.5 mmol).

<sup>1</sup>H NMR (500 MHz, CDCl<sub>3</sub>) δ 5.81 (d, *J* = 2.6 Hz, 1H), 4.26 – 4.19 (m, 2H), 4.15 (q, *J* = 7.1 Hz, 2H), 2.48 – 2.42 (m, 1H), 2.42 – 2.36 (m, 1H), 2.36 – 2.30 (m, 1H), 2.27 (t, *J* = 5.9 Hz, 1H), 1.85 – 1.78 (m, 1H), 1.36 (s, 3H), 1.26 (t, *J* = 7.1 Hz, 3H).

<sup>13</sup>C NMR (126 MHz, CDCl<sub>3</sub>) δ 177.8, 145.9, 130.2, 61.1, 59.8, 55.9, 38.0, 30.0, 23.0, 14.3.

HRMS (ESI-TOF) Calculated for C<sub>10</sub>H<sub>16</sub>O<sub>3</sub>Na, [M+Na]<sup>+</sup>: 207.0997, Found: 207.0998.

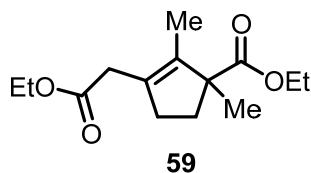

### Ethyl 3-(2-ethoxy-2-oxoethyl)-1,2-dimethylcyclopent-2-ene-1-carboxylate **59**

The compound **58** (0.34 g, 1.85 mmol) was dissolved in triethyl orthoacetate (5.0 mL) and pivalic acid (20.0 mg, 0.2 mmol) was added. The reaction mixture was heated to reflux and stirred overnight. TLC analysis at this stage suggested completion of reaction. All volatiles were removed under reduced pressure and the crude was washed with sat. aq. NaHCO<sub>3</sub> and extracted with EtOAc (three times). The combined organic layer was dried with anhydrous MgSO<sub>4</sub>, filtered, and concentrated under reduced pressure. The crude product was dissolved in toluene (15.0 mL) and *p*-TsOH (34.4 mg, 0.2 mmol) was added. The reaction mixture was heated to reflux and stirred overnight. TLC analysis at this stage suggested completion of reaction. The reaction mixture was neutralized with sat. aq. NaHCO<sub>3</sub> and extracted with EtOAc (three times). The combined organic layer was dried with anhydrous MgSO<sub>4</sub>, filtered, and concentrated under reduced pressure. The crude was purified by flash column chromatography on silica gel (5% EtOAc/hexane to 10% EtOAc/hexane) to give the desired product in 88% yield as a pale yellow oil (0.41g, 1.63 mmol).



$^1\text{H}$  NMR (600 MHz,  $\text{CDCl}_3$ )  $\delta$  4.32 – 3.90 (m, 4H), 3.12 (d,  $J = 15.1$  Hz, 1H), 3.03 (d,  $J = 15.1$  Hz, 1H), 2.50 – 2.38 (m, 2H), 2.35 (ddd,  $J = 14.3, 8.5, 3.8$  Hz, 1H), 1.78 – 1.63 (m, 1H), 1.63 – 1.51 (m, 3H), 1.26 (s, 3H), 1.26 – 1.20 (m, 6H).

$^{13}\text{C}$  NMR (151 MHz,  $\text{CDCl}_3$ )  $\delta$  176.7, 171.3, 138.0, 130.8, 60.6, 60.5, 35.6, 35.1, 34.3, 22.1, 14.4, 14.4, 10.8.

HRMS (ESI-TOF) Calculated for  $\text{C}_{14}\text{H}_{23}\text{O}_4$ ,  $[\text{M}+\text{H}]^+$ : 255.1596, Found: 255.1590.

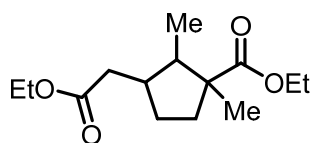

mixture of  
diastereomers  
Ratio: 2.8:2.4:1.2:1.0  
**60**

### **Ethyl 3-(2-ethoxy-2-oxoethyl)-1,2-dimethylcyclopentane-1-carboxylate 60**

The compound **59** (0.41 g, 1.63 mmol) was dissolved in AcOH (44.0 mL) and  $\text{PtO}_2$  (41.0 mg) was added. The reaction mixture was purged with  $\text{H}_2$  and the  $\text{H}_2$  atmosphere in the reaction vessel was secured with an inflated  $\text{H}_2$  balloon (4 layers). The reaction mixture was stirred at room temperature overnight. Analysis of the reaction mixture by  $^1\text{H}$  NMR spectroscopy suggested the completion of reaction. The reaction mixture was filtered through a plug of Celite  $\text{\textcircled{R}}$ , and the volatiles were evaporated to provide the desired compound as a pale yellow oil in quantitative yield (0.42 g, 1.63 mmol, d.r. 2.8:2.4:1.2:1.0).

HRMS (ESI-TOF) Calculated for  $\text{C}_{14}\text{H}_{24}\text{O}_4\text{Na}$ ,  $[\text{M}+\text{Na}]^+$ : 279.1572, Found: 279.1581.

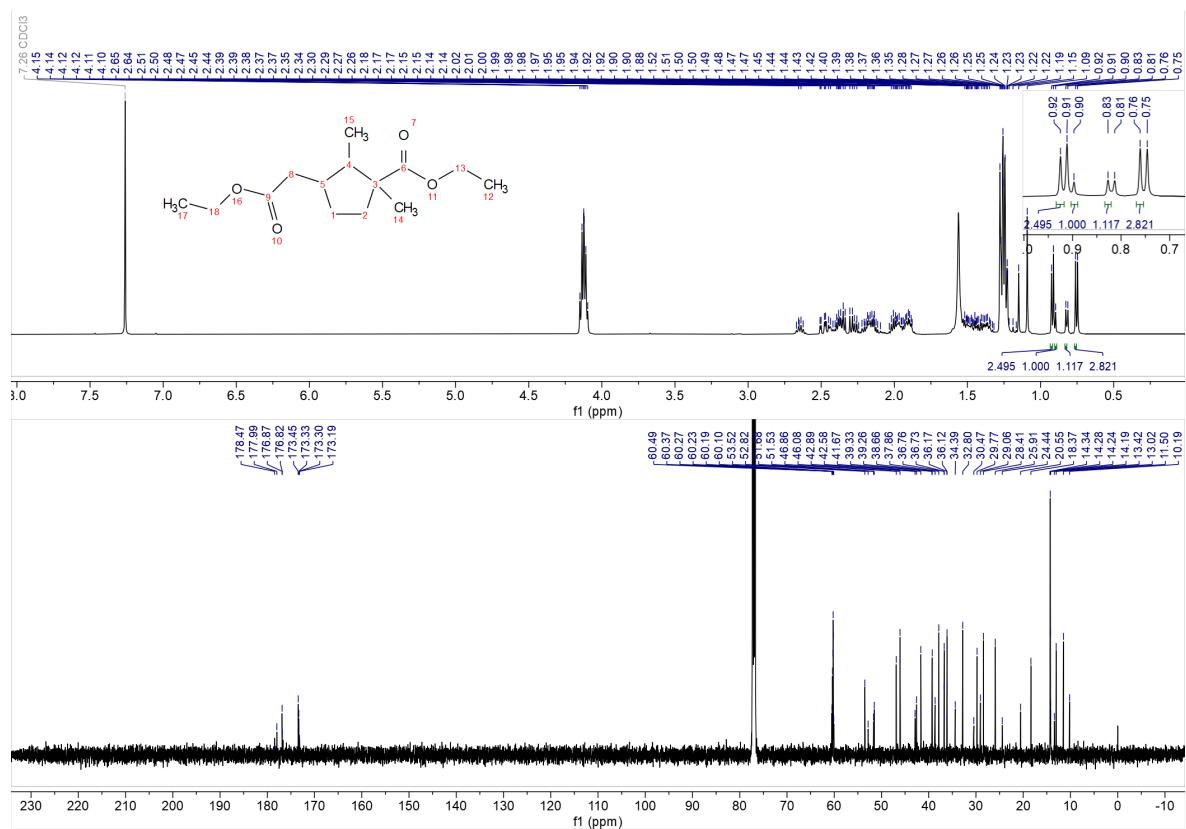

Figure S6. <sup>1</sup>H and <sup>13</sup>C NMR of compound 60.

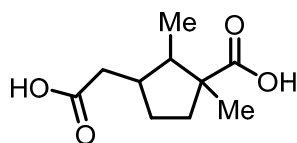

mixture of diastereomers

Ratio: 2.7:2.4:1.2:1.0

**61**

### 3-(Carboxymethyl)-1,2-dimethylcyclopentane-1-carboxylic acid 61

The compound **60** (0.42 g, 1.63 mmol) was suspended in 15% aq. NaOH and heated to reflux. The reaction mixture was stirred overnight. The reaction mixture was acidified to pH ~2 by addition of aq. HCl (6.0 M) and extracted with EtOAc (three times). The combined organic layer was dried with anhydrous MgSO<sub>4</sub>, filtered, and concentrated under reduced pressure to give the titled dicarboxylic acid in quantitative yield as a white solid (0.33 g, 1.63 mmol, d.r. 2.7:2.4:1.2:1.0).

HRMS (ESI-TOF) Calculated for C<sub>10</sub>H<sub>15</sub>O<sub>4</sub>, [M-H]<sup>-</sup>: 199.0970, Found: 199.0969.

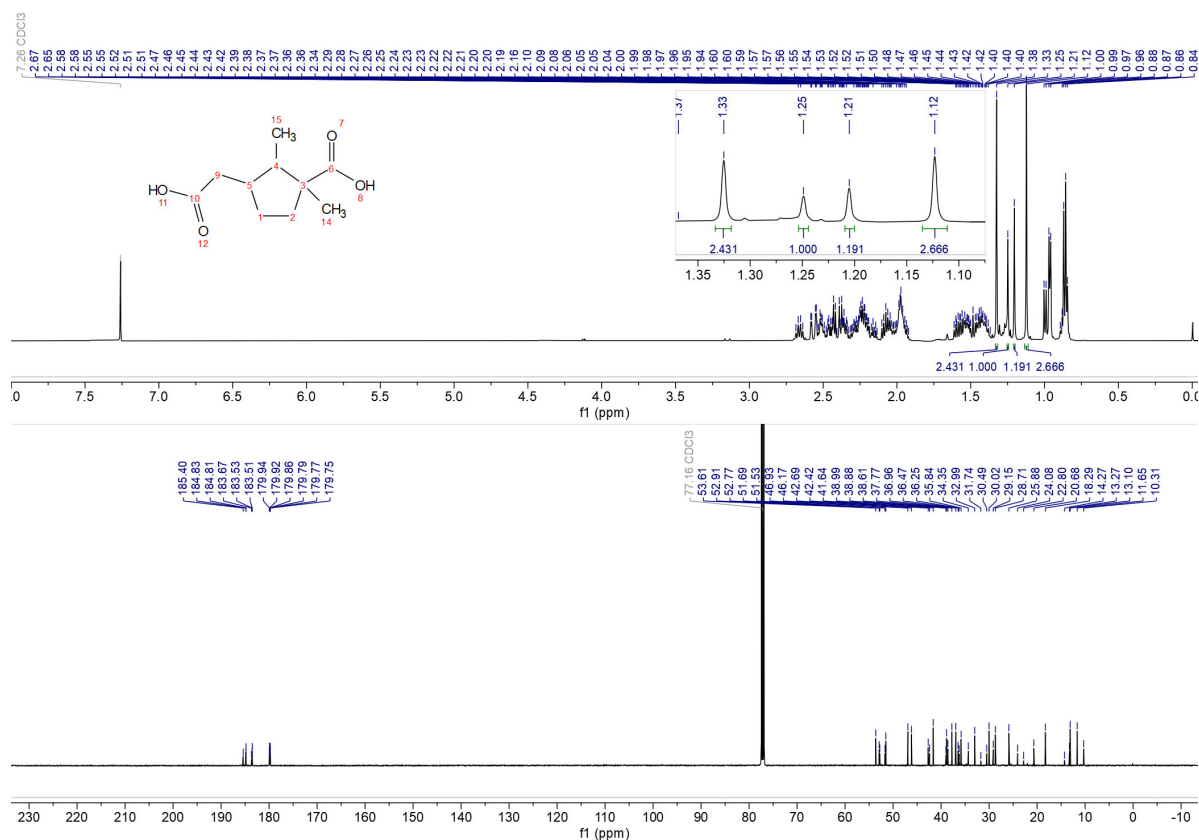

Figure S7.  $^1\text{H}$  and  $^{13}\text{C}$  NMR of compound **61**.

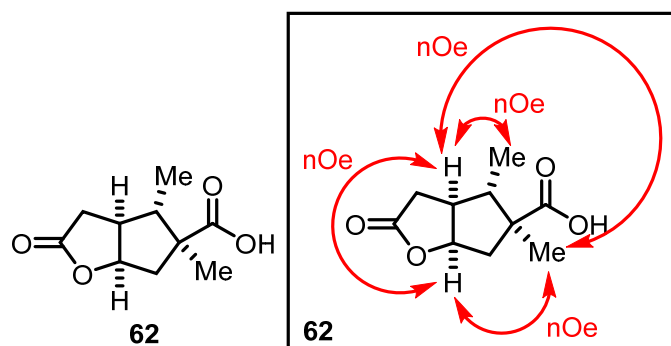

**$(3aS^*,4S^*,5S^*,6aR^*)$ -4,5-dimethyl-2-oxohexahydro-2H-cyclopenta[*b*]furan-5-carboxylic acid **62****

This compound was prepared according to the general procedure for the  $\gamma$ -directed,  $\gamma$ -C–H lactonization reaction using  $\text{Ag}_2\text{CO}_3$  as oxidant (0.1 mmol of substrate per reaction, 4 reactions set up at a time).

Following the general procedure for its synthesis, the compound was purified as the acid by column chromatography (General procedure for gradient elution: begin with 20% EtOAc/hexane + 1% AcOH, and increase the composition of EtOAc by 10% for every 8 mL of eluent used to 50% EtOAc + 1% AcOH). Isolated yield 13% based on reactive diastereomers (7.2 mg, 0.036 mmol, white solid,  $R_f$  (TLC) 40% EtOAc/hexane + 1% AcOH = 0.27).

$^1\text{H}$  NMR (600 MHz,  $\text{CDCl}_3$ )  $\delta$  4.95 (ddd,  $J = 7.6, 7.3, 4.2$  Hz, 1H), 2.77 (dd,  $J = 18.2, 9.3$  Hz, 1H), 2.51 (dddd,  $J = 10.9, 9.3, 7.6, 2.0$  Hz, 1H), 2.46 (dd,  $J = 14.7, 4.2$  Hz, 1H), 2.40 (dd,  $J = 18.2, 2.0$  Hz, 1H), 2.28 (dd,  $J = 14.7, 7.3$  Hz, 1H), 2.23 (dq,  $J = 10.9, 6.8$  Hz, 1H), 1.14 (s, 3H), 1.04 (d,  $J = 6.8$  Hz, 3H).

$^{13}\text{C}$  NMR (151 MHz,  $\text{CDCl}_3$ )  $\delta$  181.8, 176.8, 83.7, 52.1, 46.3, 45.1, 44.8, 34.1, 18.0, 13.2.

HRMS (ESI-TOF) Calculated for  $\text{C}_{10}\text{H}_{15}\text{O}_4$ ,  $[\text{M}+\text{H}]^+$ : 199.0970, Found: 199.0969.

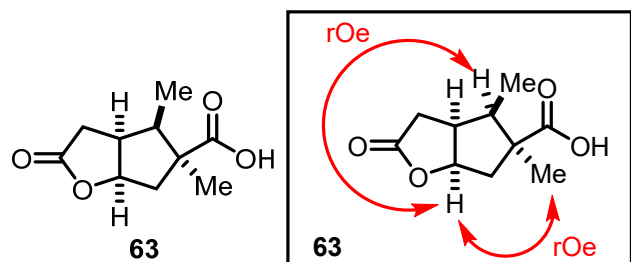

**(3a*S*\*,4*R*\*,5*S*\*,6a*R*\*)-4,5-dimethyl-2-oxohexahydro-2*H*-cyclopenta[*b*]furan-5-carboxylic acid**  
**63**

This compound was prepared according to the general procedure for the  $\gamma$ -directed,  $\gamma$ -C–H lactonization reaction using  $\text{Ag}_2\text{CO}_3$  as oxidant (0.1 mmol of substrate per reaction, 4 reactions set up at a time).

Following the general procedure for its synthesis, the compound was purified as the acid by column chromatography (General procedure for gradient elution: begin with 20% EtOAc/hexane + 1% AcOH, and increase the composition of EtOAc by 10% for every 8 mL of eluent used to 50% EtOAc + 1% AcOH). Isolated yield 31% based on reactive diastereomers (17.0 mg, 0.086 mmol, white solid,  $R_f$  (TLC) 40% EtOAc/hexane + 1% AcOH = 0.34).

$^1\text{H}$  NMR (600 MHz,  $\text{CDCl}_3$ )  $\delta$  5.04 (ddd,  $J = 8.2, 6.9, 1.9$  Hz, 1H), 3.13 (dtd,  $J = 11.6, 8.2, 3.7$  Hz, 1H), 2.74 – 2.61 (m, 2H), 2.48 (dd,  $J = 18.6, 11.6$  Hz, 1H), 2.07 (dq,  $J = 8.2, 7.5$  Hz, 1H), 1.89 (dd,  $J = 15.1, 6.9$  Hz, 1H), 1.32 (s, 3H), 1.10 (d,  $J = 7.5$  Hz, 3H).

$^{13}\text{C}$  NMR (151 MHz,  $\text{CDCl}_3$ )  $\delta$  181.0, 178.4, 84.4, 52.3, 46.2, 44.1, 42.3, 30.2, 24.6, 11.3.

HRMS (ESI-TOF) Calculated for  $\text{C}_{10}\text{H}_{15}\text{O}_4$ ,  $[\text{M}+\text{H}]^+$ : 199.0970, Found: 199.0974.

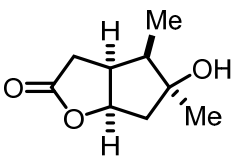

Myrotheciumone A **64**

**(3*aS*\*,4*R*\*,5*S*\*,6*aR*\*)-5-hydroxy-4,5-dimethylhexahydro-2H-cyclopenta[b]furan-2-one, myrotheciumone A **64****

This compound was prepared according to a modification of the procedure published by Khan and co-workers.(35)

The compound **63** (5.0 mg, 0.025 mmol) was dissolved in CH<sub>2</sub>Cl<sub>2</sub> (0.5 mL). Cs<sub>2</sub>CO<sub>3</sub> (12.3 mg, 0.038 mmol), NaBH<sub>4</sub> (1.1 mg, 0.030 mmol) and (Ir[dF(CF<sub>3</sub>)ppy]<sub>2</sub>(dtbpy))PF<sub>6</sub> (0.3 mg, 2.5 x 10<sup>-4</sup> mmol) was added. The reaction mixture was purged with O<sub>2</sub> and kept under an atmosphere of O<sub>2</sub> in a sealed 2-dram reaction vial. The reaction mixture was stirred for 40 hours under irradiation with four 100W blue LED lamps 5 cm away from the reaction vessel. The reaction mixture was diluted with H<sub>2</sub>O, followed by extraction with EtOAc (three times). The combined organic layer was dried with anhydrous MgSO<sub>4</sub>, filtered, and concentrated under reduced pressure. The crude was purified by flash column chromatography on silica gel (20% EtOAc/hexane to 50% EtOAc/hexane) to give the desired product in 39% yield (1.7 mg, 9.8 x 10<sup>-3</sup> mmol). The NMR spectroscopic data of our synthetic myrotheciumone A is in accordance with the NMR spectroscopic data in literature.(21, 22)

<sup>1</sup>H NMR (600 MHz, CDCl<sub>3</sub>) δ 5.03 (t, *J* = 7.6 Hz, 1H), 3.05 (dtd, *J* = 12.2, 8.3, 4.5 Hz, 1H), 2.77 (dd, *J* = 18.7, 4.5 Hz, 1H), 2.45 (dd, *J* = 18.7, 12.2 Hz, 1H), 2.18 (d, *J* = 15.1 Hz, 1H), 1.87 (dd, *J* = 15.1, 7.1 Hz, 1H), 1.87 – 1.82 (m, 1H), 1.27 (s, 3H), 1.03 (d, *J* = 7.1 Hz, 3H).

<sup>13</sup>C NMR (151 MHz, CDCl<sub>3</sub>) δ 178.5, 83.6, 79.7, 48.0, 45.2, 42.3, 30.2, 25.6, 8.8.

HRMS (ESI-TOF) Calculated for C<sub>9</sub>H<sub>14</sub>O<sub>3</sub>Na, [M+Na]<sup>+</sup>: 193.0841, Found: 193.0848.

## Determination of yields for **62** and **63**:

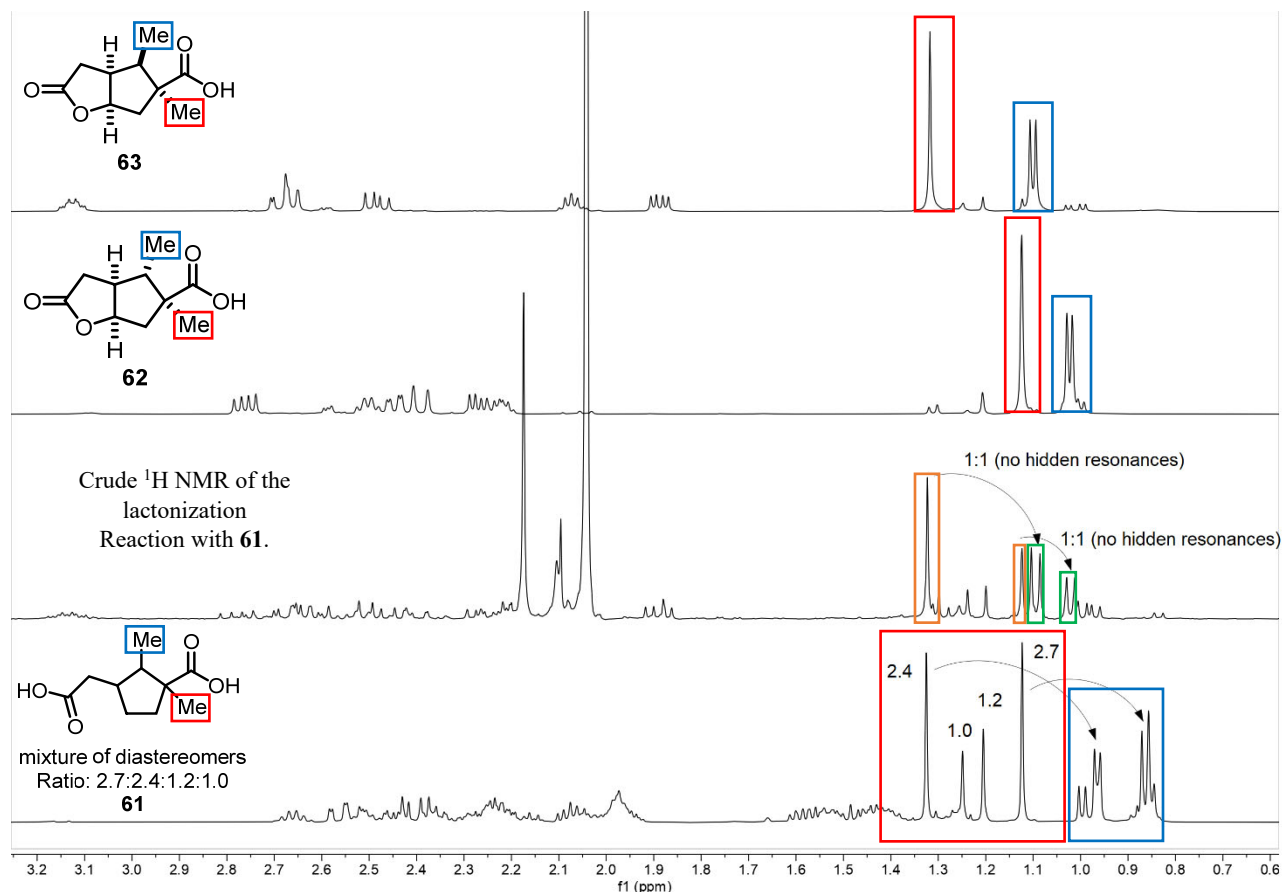

**Figure S8.**  $^1\text{H}$  NMRs of **62**, **63**, crude  $^1\text{H}$  NMR of the lactonization reaction with **61**, and **61** for the determination of yield of **62** and **63** based on reactive diastereomers.

As previously observed with the lactonization of **53** to give lactone **53b**, only the *syn*-diacids were found to be reactive whereas the *anti*-diacids were not. The same phenomenon was observed in the case for **61**.

In the lowest panel, the 4 singlet resonances around 1.1-1.3 ppm with a ratio of 2.4, 1.0, 1.2, and 2.7 correspond to the methyl groups bonded to the quaternary centers of the 4 diastereomers of **61** (highlighted in red). The cluster of doublet resonances around 0.8-1.0 ppm correspond to the methyl groups bonded to the methine carbons of the 4 diastereomers of **61** (highlighted in blue).

In the second lowest panel displaying the crude  $^1\text{H}$  NMR of the lactonization reaction with **61**, the doublet resonances corresponding to the diastereomers of **61** having the ratio 2.4 and 2.7 were found to be consumed, whereas the other two doublets remain. The two new doublets that emerged around 1.0-1.1 ppm (highlighted in green) each has a 1:1 integration ratio with the two singlets (highlighted in orange). These resonances correspond to **62** and **63**. This suggests that the consumed diastereomers are the reactive diastereomers. The no. of mmol of reactive diastereomers of **61** is therefore:  $[(2.4+2.7)/(2.4+2.7+1.0+1.2)]*0.4 = 0.28$  mmol, for 4 reactions each at 0.1 mmol scale.

The yield of **62** based on the reactive diastereomers of **61** is therefore:  $(0.036/0.28)*100\% = 13\%$

The yield of **63** based on the reactive diastereomers of **61** is therefore:  $(0.086/0.28)*100\% = 31\%$

**Comparison of synthetic and literature NMR data of myrotheciumone A:**

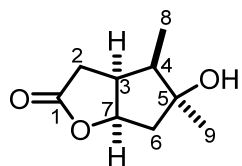

myrotheciumone A

| Atom Number | $\delta^1\text{H/ppm}$ (synthetic)<br>600 MHz, $\text{CDCl}_3$ | $\delta^1\text{H/ppm}$ (literature)(21)<br>600 MHz, $\text{CDCl}_3$ | $\delta^1\text{H/ppm}$ (literature)(36)<br>400 MHz, $\text{CDCl}_3$ |
|-------------|----------------------------------------------------------------|---------------------------------------------------------------------|---------------------------------------------------------------------|
| 1           | -                                                              | -                                                                   | -                                                                   |
| 2           | 2.77, dd (18.7, 4.5)<br>2.45, dd (18.7, 12.2)                  | 2.82, dd (18.5, 4.1)<br>2.51, dd (18.5, 12.1)                       | 2.76, dd (18.5, 4.3)<br>2.44, dd (18.5, 11.9)                       |
| 3           | 3.05, dtd (12.2, 8.3, 4.5)                                     | 3.09, m                                                             | 3.09-3.00, m                                                        |
| 4           | 1.84, m                                                        | 1.89, m                                                             | 1.87-1.80, m                                                        |
| 5           | -                                                              | -                                                                   | -                                                                   |
| 6           | 2.18, d (15.1)<br>1.87, dd (15.1, 7.1)                         | 2.22, d (15.2)<br>1.92, dd (14.9, 6.6)                              | 2.18, dd (15.1)<br>1.86, dd (15.3, 6.6)                             |
| 7           | 5.03, t (7.6)                                                  | 5.07, t (7.1)                                                       | 5.03, t (7.1)                                                       |
| 8           | 1.03, d (7.1)                                                  | 1.06, d (7.0)                                                       | 1.02, d (7.0)                                                       |
| 9           | 1.27, s                                                        | 1.28, s                                                             | 1.26, s                                                             |

**Table S12.** Comparison of synthetic and literature  $^1\text{H}$  NMR data of myrotheciumone A.

| Atom Number | $\delta^{13}\text{C/ppm}$ (synthetic)<br>151 MHz, $\text{CDCl}_3$ | $\delta^{13}\text{C/ppm}$ (literature)(34)<br>100 MHz, $\text{CDCl}_3$ | $\delta^{13}\text{C/ppm}$ (literature)(36)<br>100 MHz, $\text{CDCl}_3$ |
|-------------|-------------------------------------------------------------------|------------------------------------------------------------------------|------------------------------------------------------------------------|
| 1           | 178.5                                                             | 178.3                                                                  | 178.4                                                                  |
| 2           | 30.2                                                              | 30.1                                                                   | 30.0                                                                   |
| 3           | 42.3                                                              | 42.1                                                                   | 42.1                                                                   |
| 4           | 45.2                                                              | 45.1                                                                   | 45.0                                                                   |
| 5           | 79.8                                                              | 79.6                                                                   | 79.5                                                                   |
| 6           | 48.0                                                              | 47.8                                                                   | 47.7                                                                   |
| 7           | 83.6                                                              | 83.4                                                                   | 83.4                                                                   |
| 8           | 8.8                                                               | 8.7                                                                    | 8.6                                                                    |
| 9           | 25.6                                                              | 25.5                                                                   | 25.3                                                                   |

**Table S13.** Comparison of synthetic and literature  $^{13}\text{C}$  NMR data of myrotheciumone A.

$^1\text{H}$  NMR spectra (Synthetic: 600 MHz,  $\text{CDCl}_3$ ; Literature(36): 400 MHz,  $\text{CDCl}_3$ ):

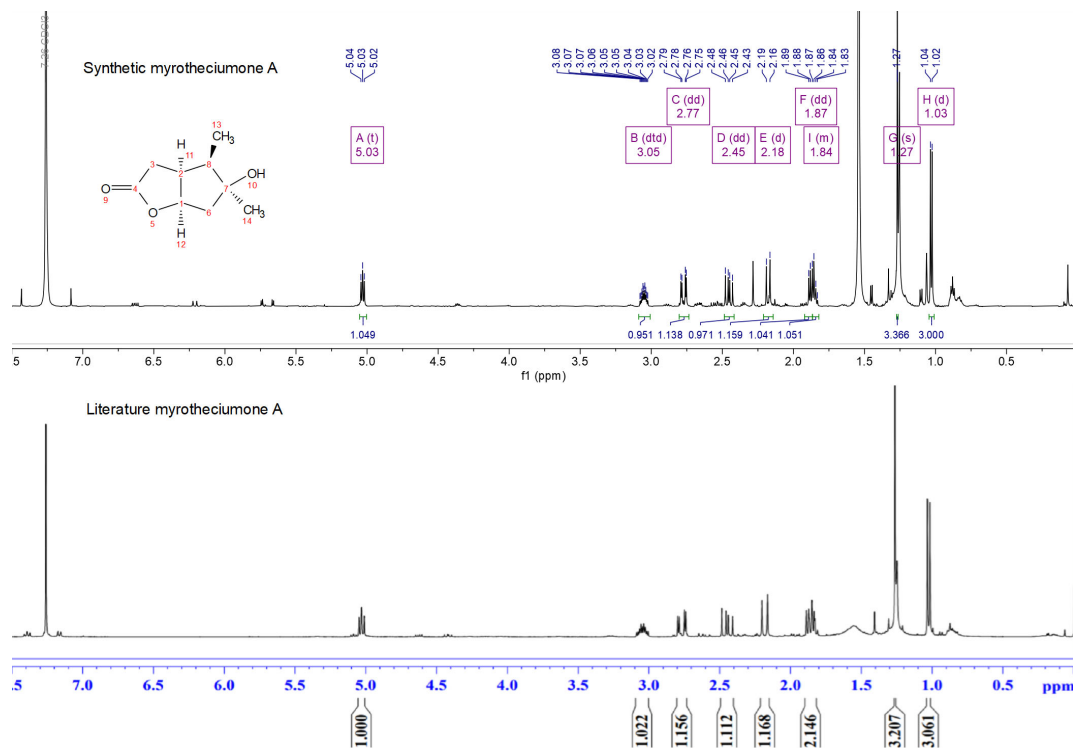

**Figure S9.** Comparison of synthetic and literature  $^1\text{H}$  NMR spectra of myrotheciumone A.

$^{13}\text{C}$  NMR spectra (Synthetic: 151 MHz,  $\text{CDCl}_3$ ; Literature(36): 100 MHz,  $\text{CDCl}_3$ ):

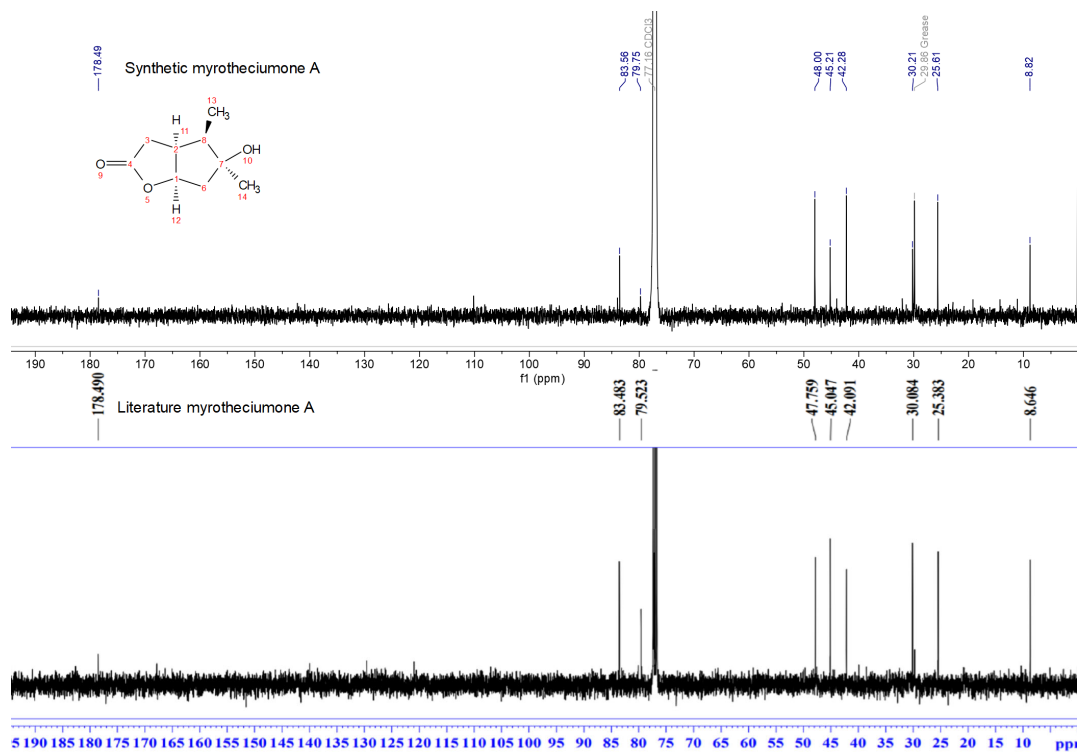

**Figure S10.** Comparison of synthetic and literature  $^{13}\text{C}$  NMR spectra of myrotheciumone A.



## Total synthesis of pedicellosine

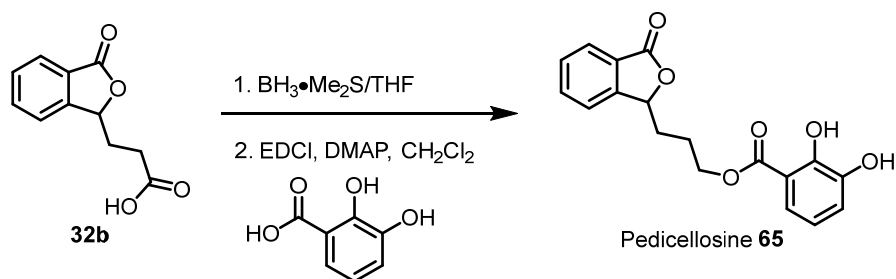

To an ice-cold solution of acid **32b** (10.3 mg, 0.05 mmol) in THF (1 mL), a borane dimethyl sulfide complex (0.4 mL, 0.08 mmol) was added dropwise. The solution was warmed at room temperature and stirred for overnight. Then the reaction was cooled at 0 °C and quenched with MeOH (0.5 mL) and stirred for 10 min. The residue was dissolved in EtOAc, washed with brine, dried over  $\text{Na}_2\text{SO}_4$  and concentrated in vacuo to obtain the alcohol, which was used in the next step without further purification.

To a solution of the alcohol (0.05 mmol), 2,3-dihydroxybenzoic acid (11.6 mg, 0.075 mmol) in  $\text{CH}_2\text{Cl}_2$  (1 mL). EDCI (14.4 mg, 0.075 mmol), DMAP (1.2 mg, 0.01 mmol) was added. The mixture was stirred at room temperature for 24 h. After the addition of water, the solution was extracted with  $\text{CH}_2\text{Cl}_2$ . The solvent was removed under reduced pressure, and the crude product was further purified by flash chromatography (hexane/EA 3:1) to obtain the desired product in 90% yield for two steps (14.8 mg, 0.045 mmol, colorless oil).

Please refer to Section 2.5 for the synthesis of **32b**.

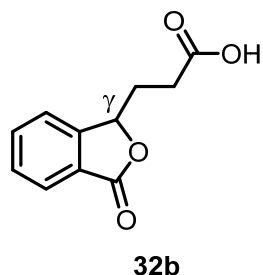

### 3-(3-Oxo-1,3-dihydroisobenzofuran-1-yl)propanoic acid **32b** (as free carboxylic acid)

$^1\text{H}$  NMR (600 MHz,  $\text{CD}_3\text{OD}$ )  $\delta$  7.86 (dd,  $J = 7.7, 1.0$  Hz, 1H), 7.77 (td,  $J = 7.5, 1.1$  Hz, 1H), 7.66 – 7.57 (m, 2H), 5.65 (dd,  $J = 8.3, 3.3$  Hz, 1H), 2.54 – 2.43 (m, 2H), 2.43 – 2.36 (m, 1H), 2.02 – 1.92 (m, 1H).

$^{13}\text{C}$  NMR (151 MHz,  $\text{CD}_3\text{OD}$ )  $\delta$  176.2, 172.4, 151.2, 135.7, 130.5, 127.0, 126.3, 123.5, 82.2, 31.0, 30.3.

HRMS (ESI-TOF) Calculated for  $\text{C}_{11}\text{H}_9\text{O}_4$ ,  $[\text{M}-\text{H}]^-$ , 205.0506, found: 205.0510.

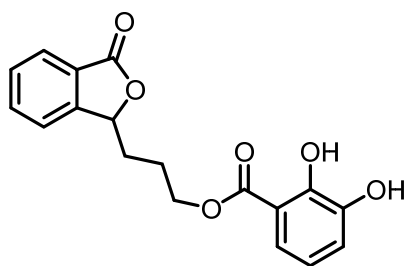

Pedicellosine **65**

**3-(3-Oxo-1,3-dihydroisobenzofuran-1-yl)propyl 2,3-dihydroxybenzoate, pedicellosine 65**

$^1\text{H}$  NMR (600 MHz,  $\text{CD}_3\text{OD}$ )  $\delta$  7.88 (d,  $J = 7.5$  Hz, 1H), 7.78 (td,  $J = 7.5, 1.1$  Hz, 1H), 7.64 (d,  $J = 7.6$  Hz, 1H), 7.61 (t,  $J = 7.5$  Hz, 1H), 7.36 (dd,  $J = 8.1, 1.5$  Hz, 1H), 7.03 (dd,  $J = 7.9, 1.5$  Hz, 1H), 6.77 (t,  $J = 7.9$  Hz, 1H), 5.71 (dd,  $J = 7.6, 3.9$  Hz, 1H), 4.58 – 4.17 (m, 2H), 2.34 (ddt,  $J = 13.7, 8.7, 3.6$  Hz, 1H), 2.02 – 1.95 (m, 1H), 1.95 – 1.84 (m, 2H).

$^{13}\text{C}$  NMR (151 MHz,  $\text{CD}_3\text{OD}$ )  $\delta$  172.5, 171.7, 151.5, 151.4, 147.2, 135.7, 130.5, 127.0, 126.3, 123.4, 121.8, 121.2, 120.1, 113.9, 82.7, 65.9, 32.2, 25.2.

HRMS (ESI-TOF) Calculated for  $\text{C}_{18}\text{H}_{17}\text{O}_6$ ,  $[\text{M}+\text{H}]^+$ , 329.1020, found: 329.1032.

**Comparison of synthetic and literature NMR data of pedicellosine:**

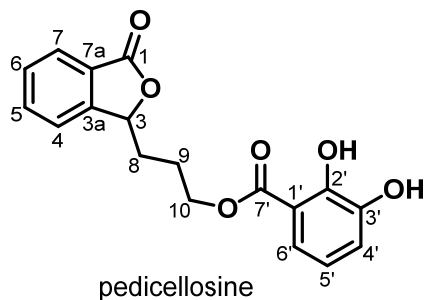

| Atom Number | $\delta^1\text{H/ppm}$ (synthetic)<br>600 MHz, $\text{CD}_3\text{OD}$ | $\delta^1\text{H/ppm}$ (literature)(37)<br>300 MHz, $\text{CD}_3\text{OD}$ |
|-------------|-----------------------------------------------------------------------|----------------------------------------------------------------------------|
| <b>1</b>    | -                                                                     | -                                                                          |
| <b>3</b>    | 5.71, dd (7.6, 3.9)                                                   | 5.68, dd (7.5, 3.5)                                                        |
| <b>4</b>    | 7.64, d (7.6)                                                         | 7.62, d (7.5)                                                              |
| <b>5</b>    | 7.78, td (7.5, 1.1)                                                   | 7.75, td (7.5, 7.5, 1)                                                     |
| <b>6</b>    | 7.62, t (7.5)                                                         | 7.59 td (7.5, 7.5, 1)                                                      |
| <b>7</b>    | 7.89, d (7.5)                                                         | 7.86 d (7.5)                                                               |
| <b>8</b>    | 2.34, ddt (13.7, 8.7, 3.6)                                            | 2.29, m                                                                    |
|             | 1.92, m                                                               | 1.88, m                                                                    |
| <b>9</b>    | 1.99, m                                                               | 1.95, m                                                                    |
| <b>10</b>   | 4.43, m                                                               | 4.41, m                                                                    |
| <b>1'</b>   | -                                                                     | -                                                                          |
| <b>2'</b>   | -                                                                     | -                                                                          |
| <b>3'</b>   | -                                                                     | -                                                                          |
| <b>4'</b>   | 7.03, dd (7.9, 1.5)                                                   | 7.01, dd (8, 1.5)                                                          |
| <b>5'</b>   | 6.77, t (7.9)                                                         | 6.75, t (8)                                                                |
| <b>6'</b>   | 7.36, dd (8.1, 1.5)                                                   | 7.33, dd (8, 1.5)                                                          |
| <b>7'</b>   | -                                                                     | -                                                                          |

**Table S14.** Comparison of synthetic and literature  $^1\text{H}$  NMR data of pedicellosine.

The slight difference in  $^1\text{H}$  NMR chemical shifts is due to different calibration.

| <b>Atom Number</b> | $\delta^{13}\text{C}/\text{ppm}$ (synthetic)<br>151 MHz, CD <sub>3</sub> OD | $\delta^{13}\text{C}/\text{ppm}$ (literature)(37)<br>76 MHz, CD <sub>3</sub> OD |
|--------------------|-----------------------------------------------------------------------------|---------------------------------------------------------------------------------|
| <b>1</b>           | 172.5                                                                       | 171.7                                                                           |
| <b>3</b>           | 82.7                                                                        | 82.7                                                                            |
| <b>3a</b>          | 151.5                                                                       | 151.5                                                                           |
| <b>4</b>           | 123.4                                                                       | 123.4                                                                           |
| <b>5</b>           | 135.7                                                                       | 135.7                                                                           |
| <b>6</b>           | 130.5                                                                       | 130.5                                                                           |
| <b>7</b>           | 126.3                                                                       | 126.3                                                                           |
| <b>7a</b>          | 127.0                                                                       | 127.0                                                                           |
| <b>8</b>           | 25.2                                                                        | 25.2                                                                            |
| <b>9</b>           | 32.2                                                                        | 32.2                                                                            |
| <b>10</b>          | 65.9                                                                        | 66.0                                                                            |
| <b>1'</b>          | 113.9                                                                       | 115.0                                                                           |
| <b>2'</b>          | 151.4                                                                       | 151.5                                                                           |
| <b>3'</b>          | 147.2                                                                       | 147.2                                                                           |
| <b>4'</b>          | 121.8                                                                       | 121.8                                                                           |
| <b>5'</b>          | 120.1                                                                       | 120.1                                                                           |
| <b>6'</b>          | 121.2                                                                       | 121.3                                                                           |
| <b>7'</b>          | 171.7                                                                       | 171.7                                                                           |

**Table S15.** Comparison of synthetic and literature <sup>13</sup>C NMR data of pedicellosine.

The slight difference in <sup>13</sup>C NMR chemical shifts is due to different calibration.

## 4. NMR Spectra

### 2-(5-Oxotetrahydrofuran-2-yl)acetic acid **1a**

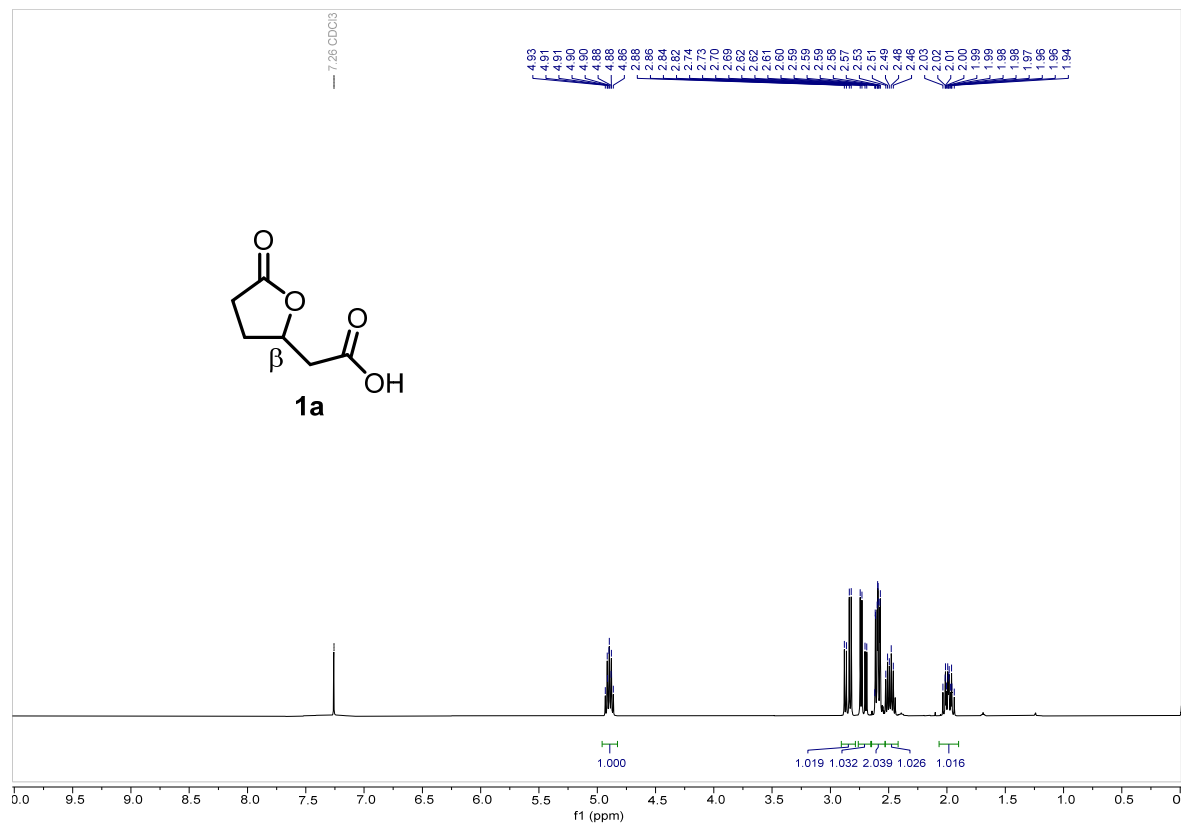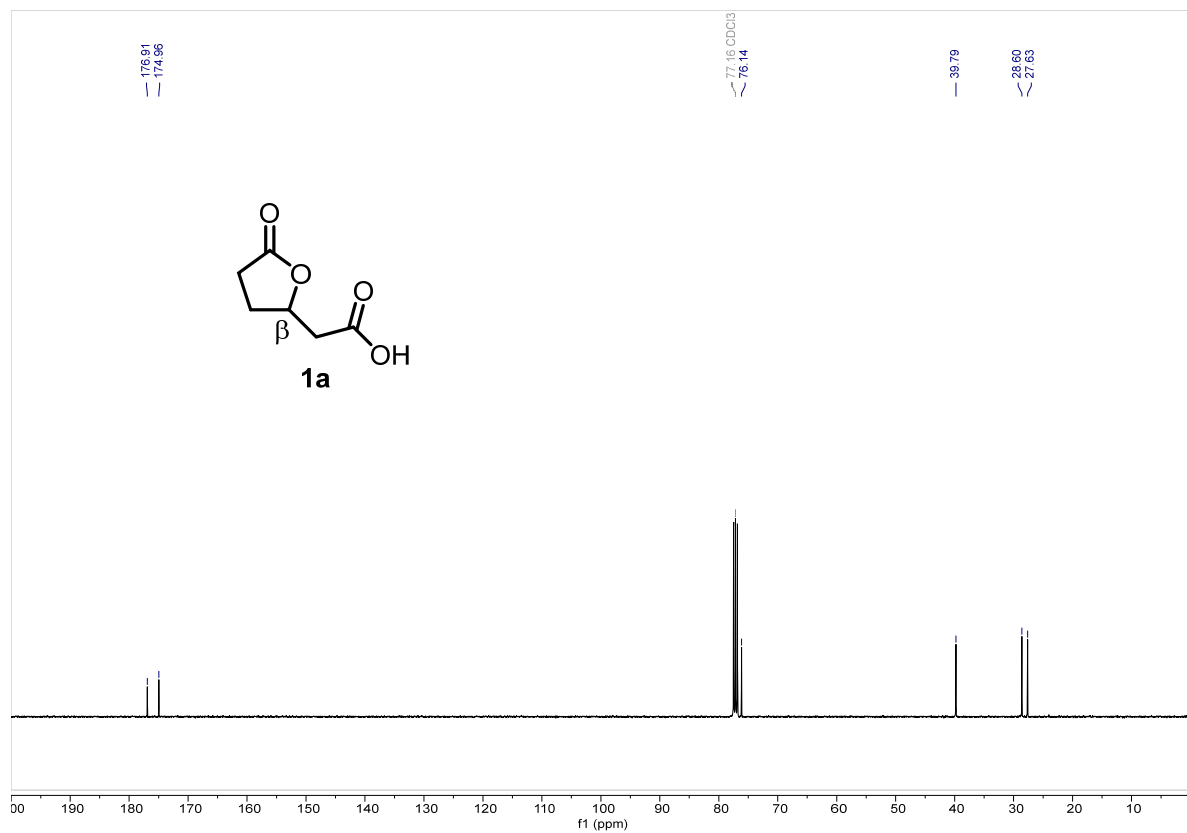

# Benzyl 2-(4-methyl-5-oxotetrahydrofuran-2-yl)acetate 6a

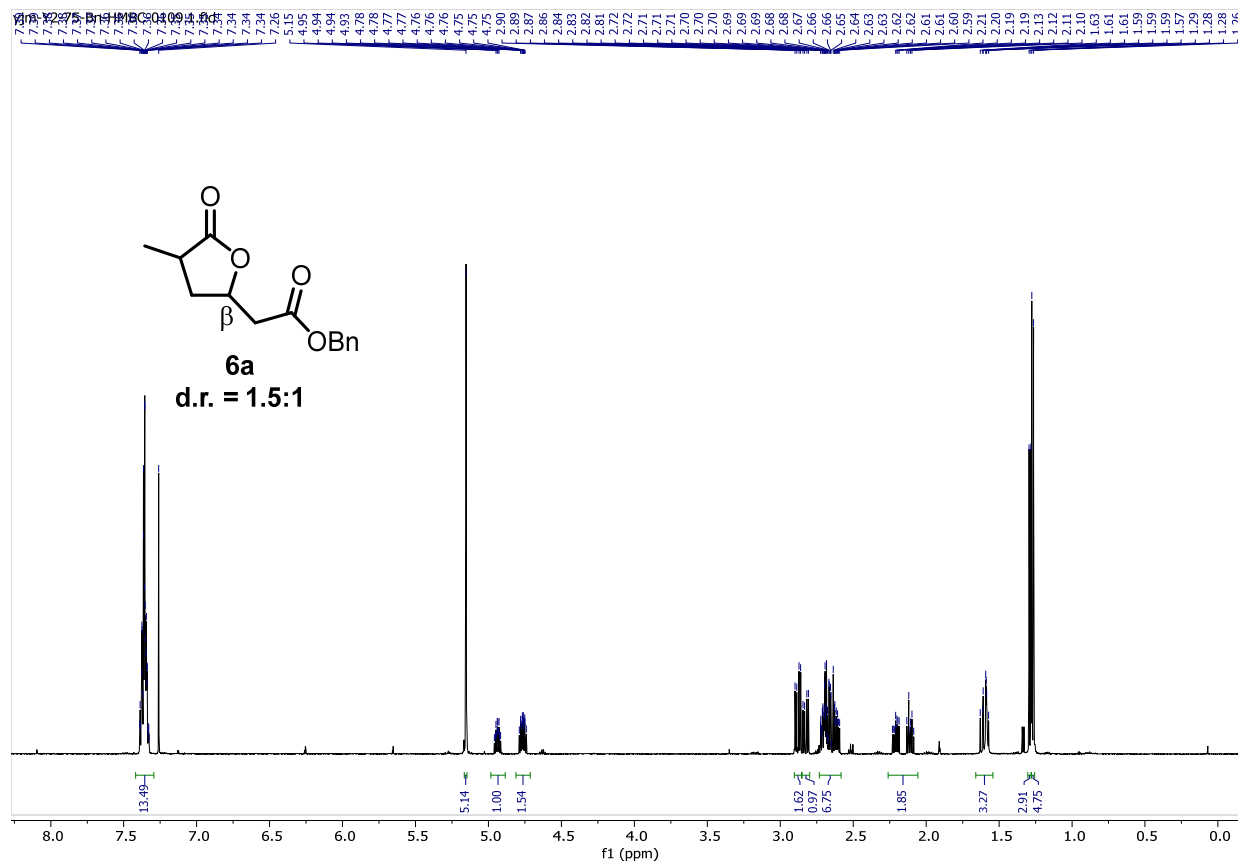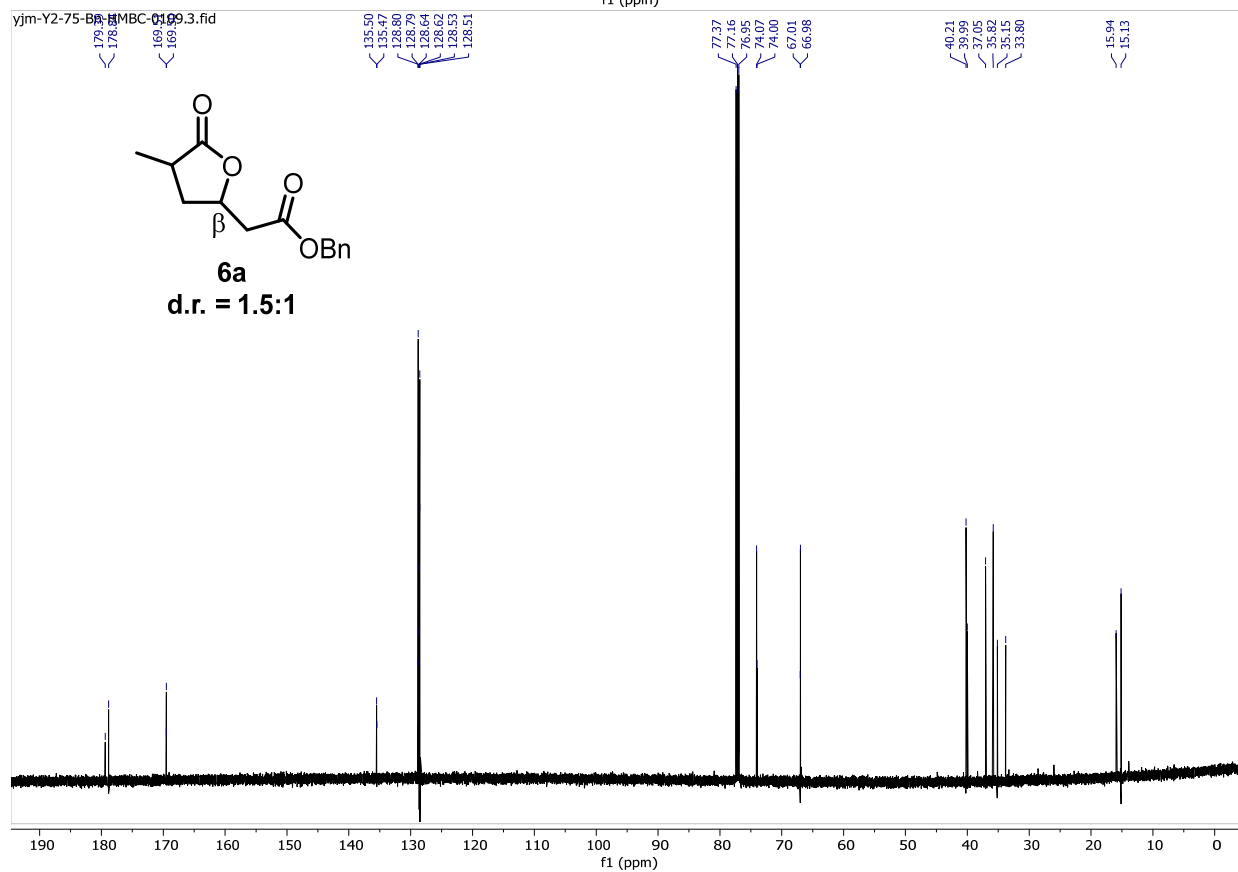

## 2-(4-Ethyl-5-oxotetrahydrofuran-2-yl)acetic acid 7a

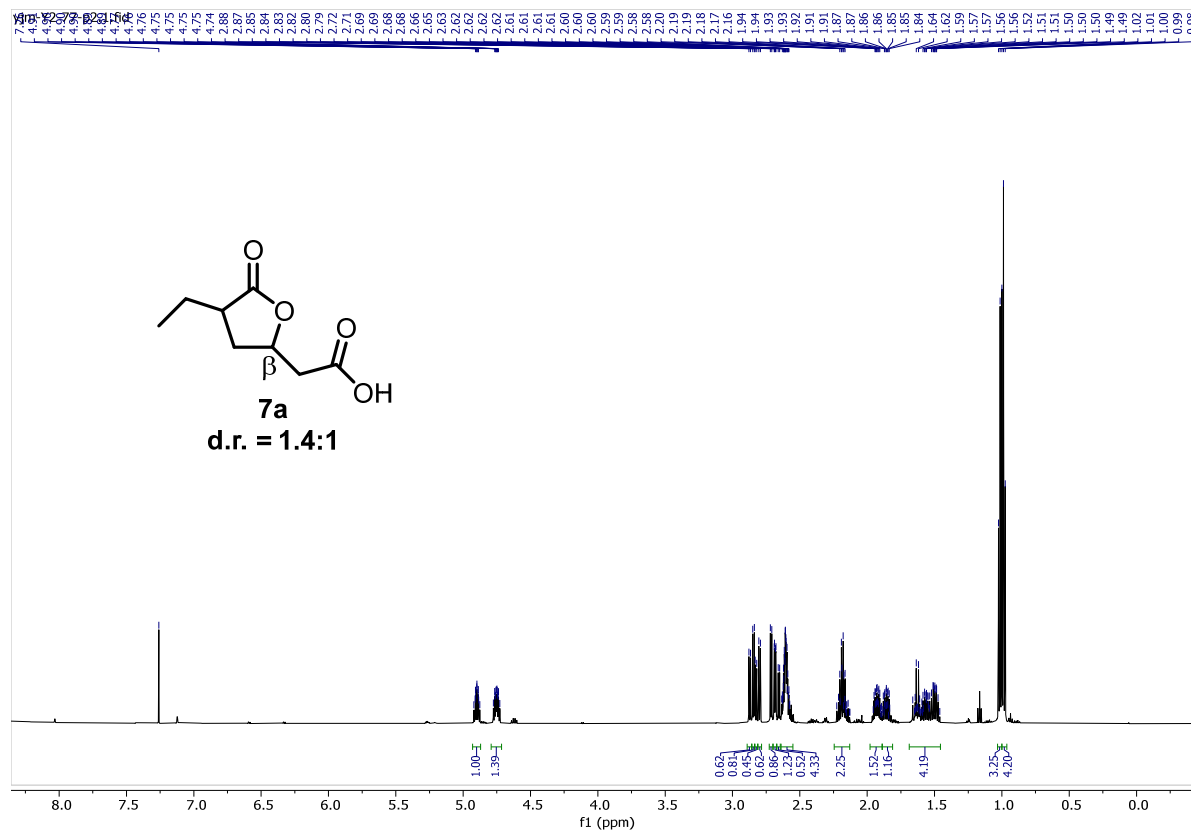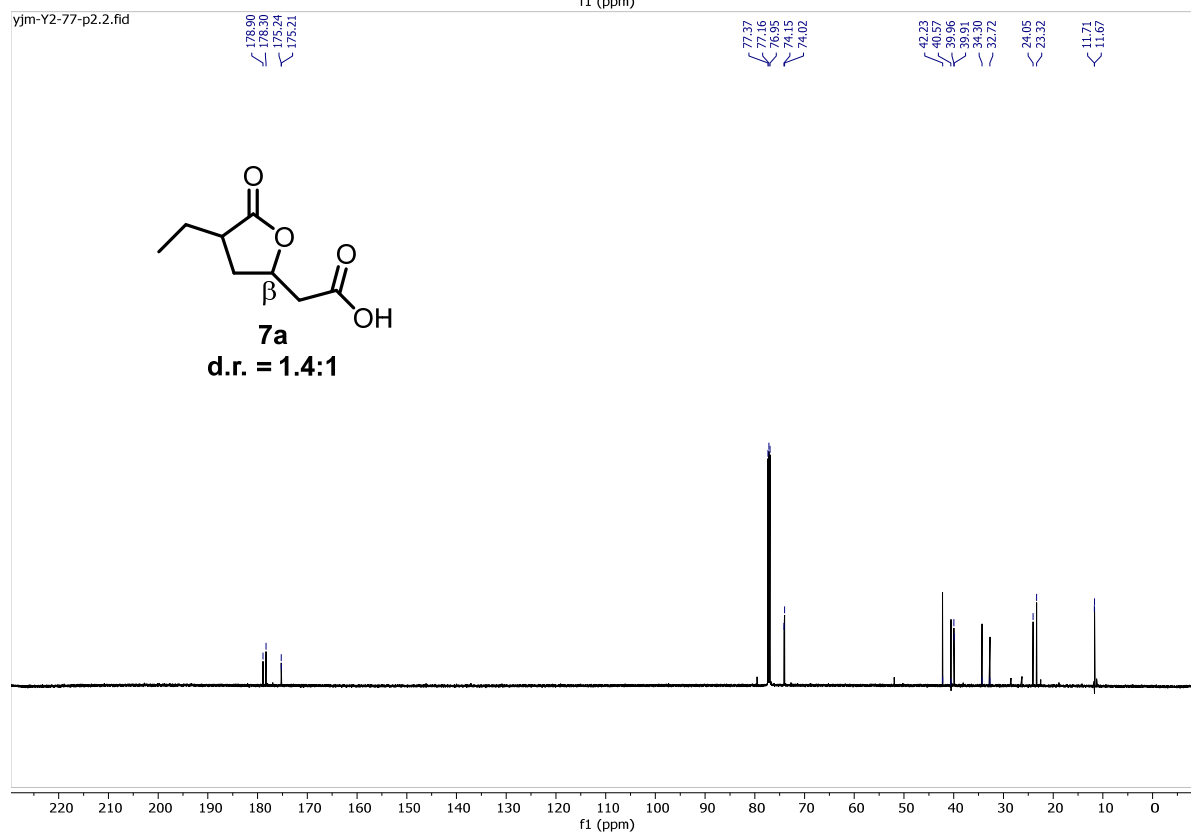

## 2-(4-Isopropyl-5-oxotetrahydrofuran-2-yl)acetic acid **8a**

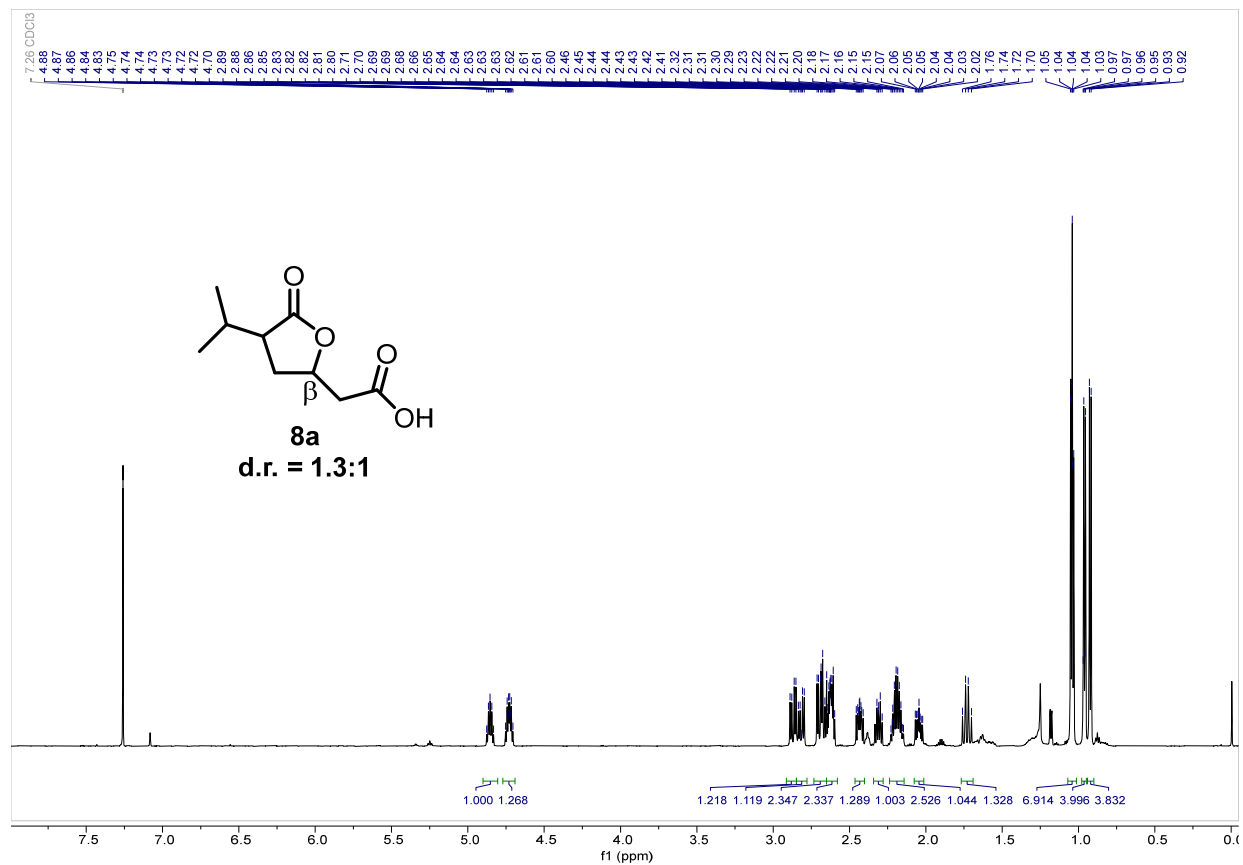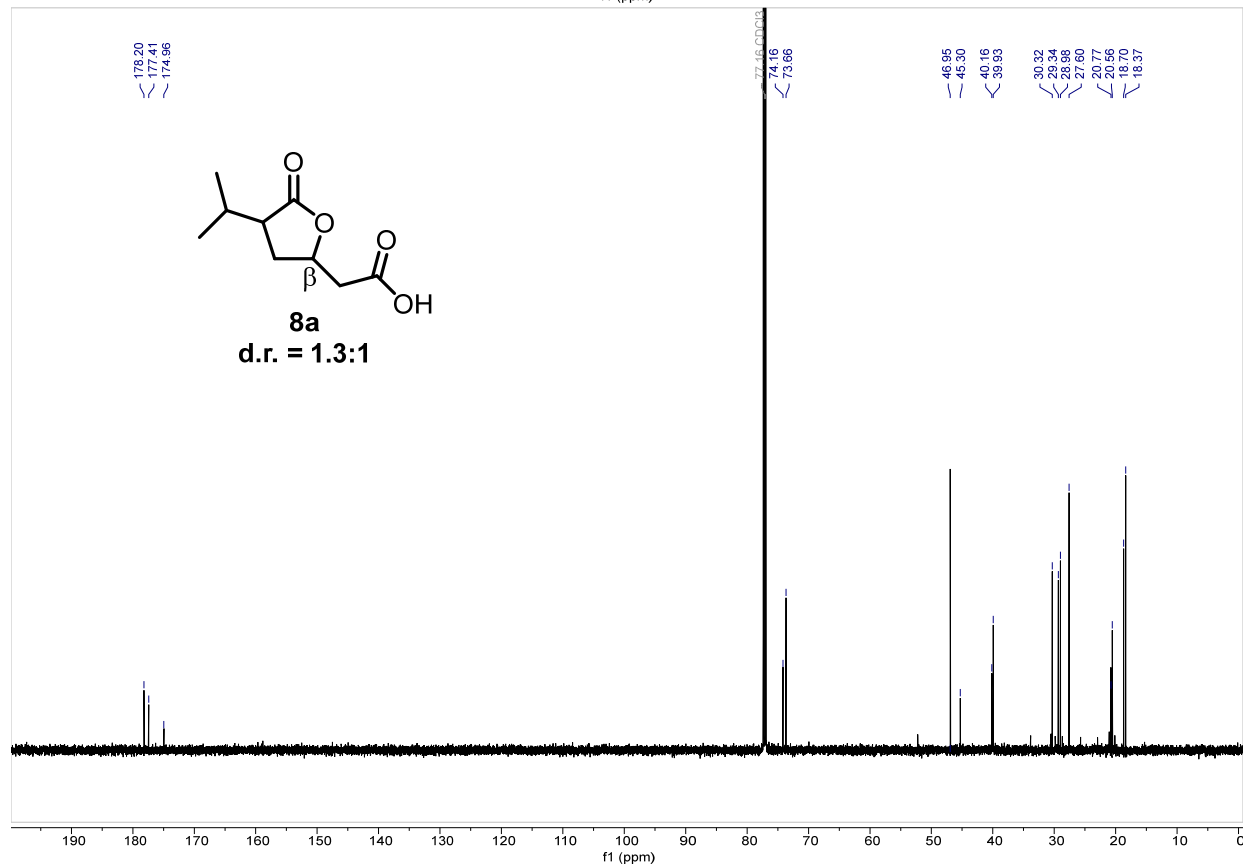



## 2-(4-Benzyl-5-oxotetrahydrofuran-2-yl)acetic acid 9a

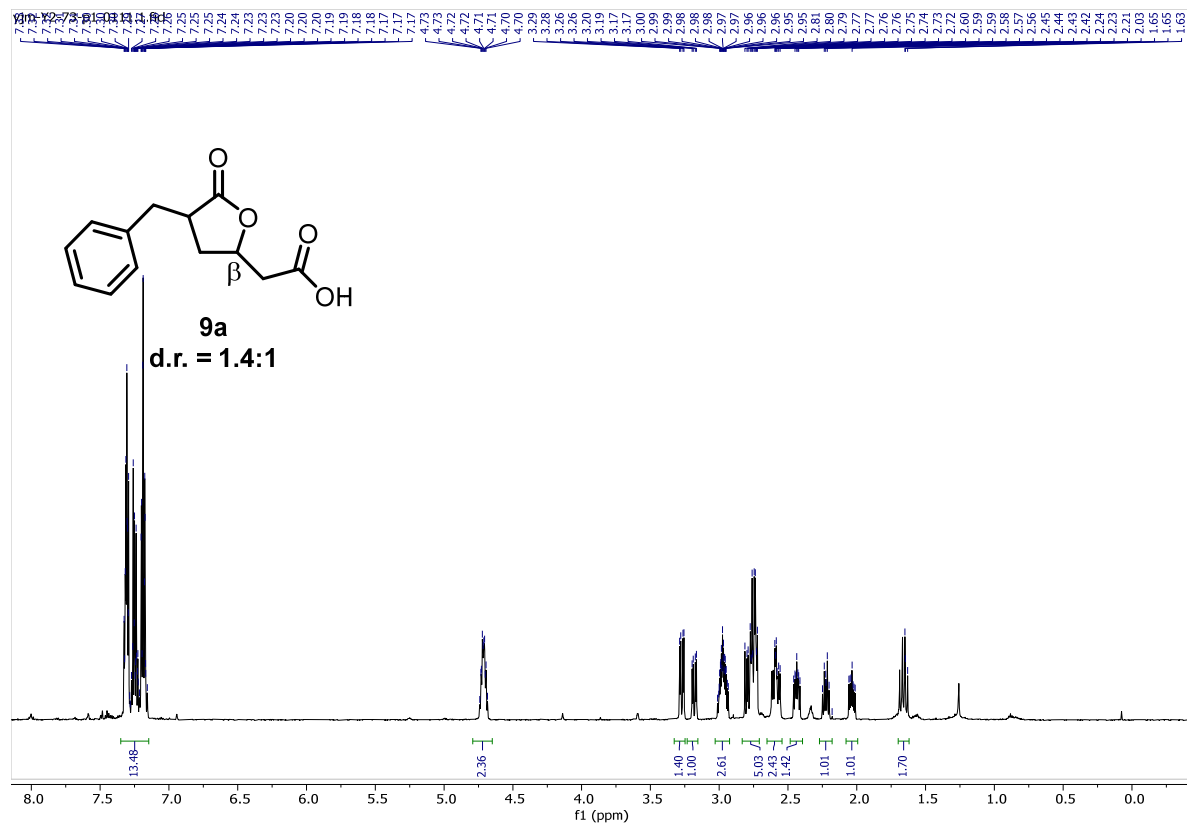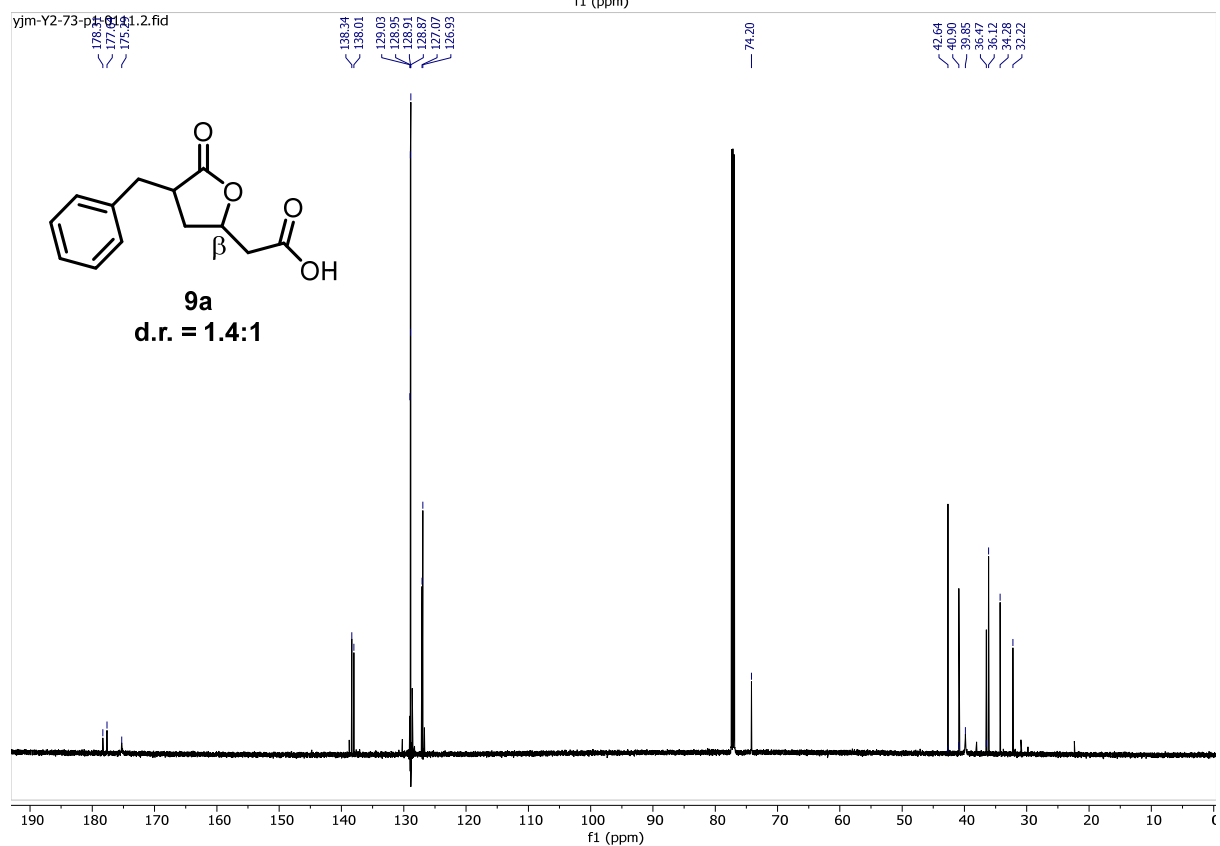

# Benzyl 2-(4-(*tert*-butyl)-5-oxotetrahydrofuran-2-yl)acetate 10a

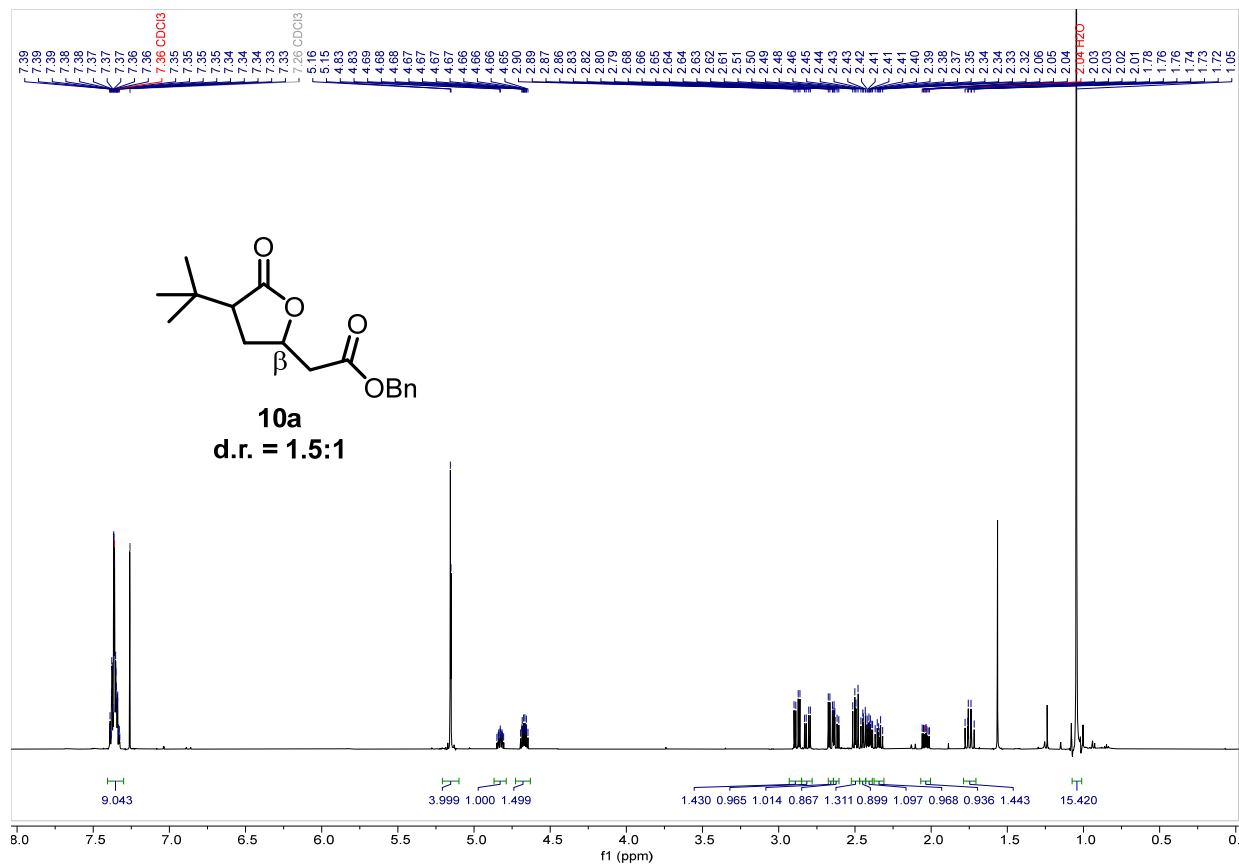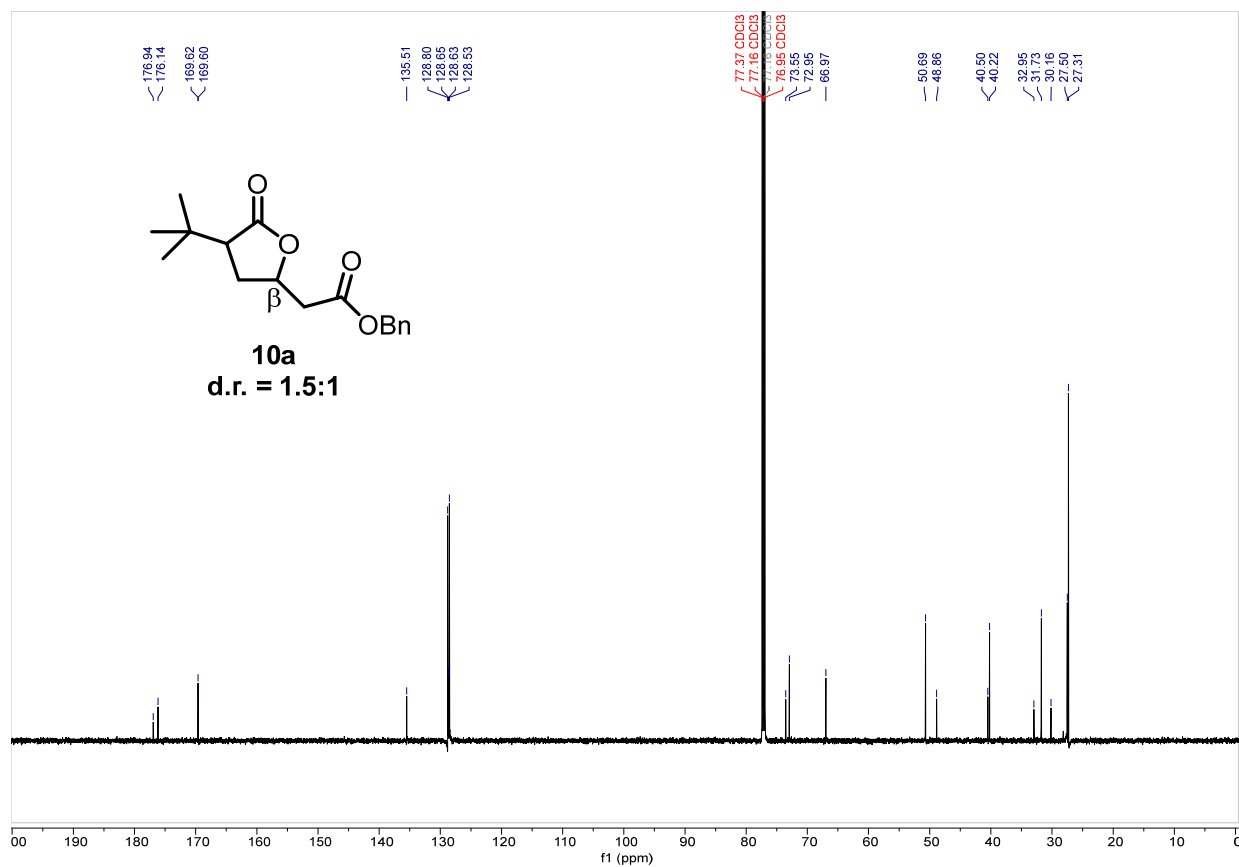

# Benzyl 2-(4-(1,3-dioxoisindolin-2-yl)-5-oxotetrahydrofuran-2-yl)acetate 11a

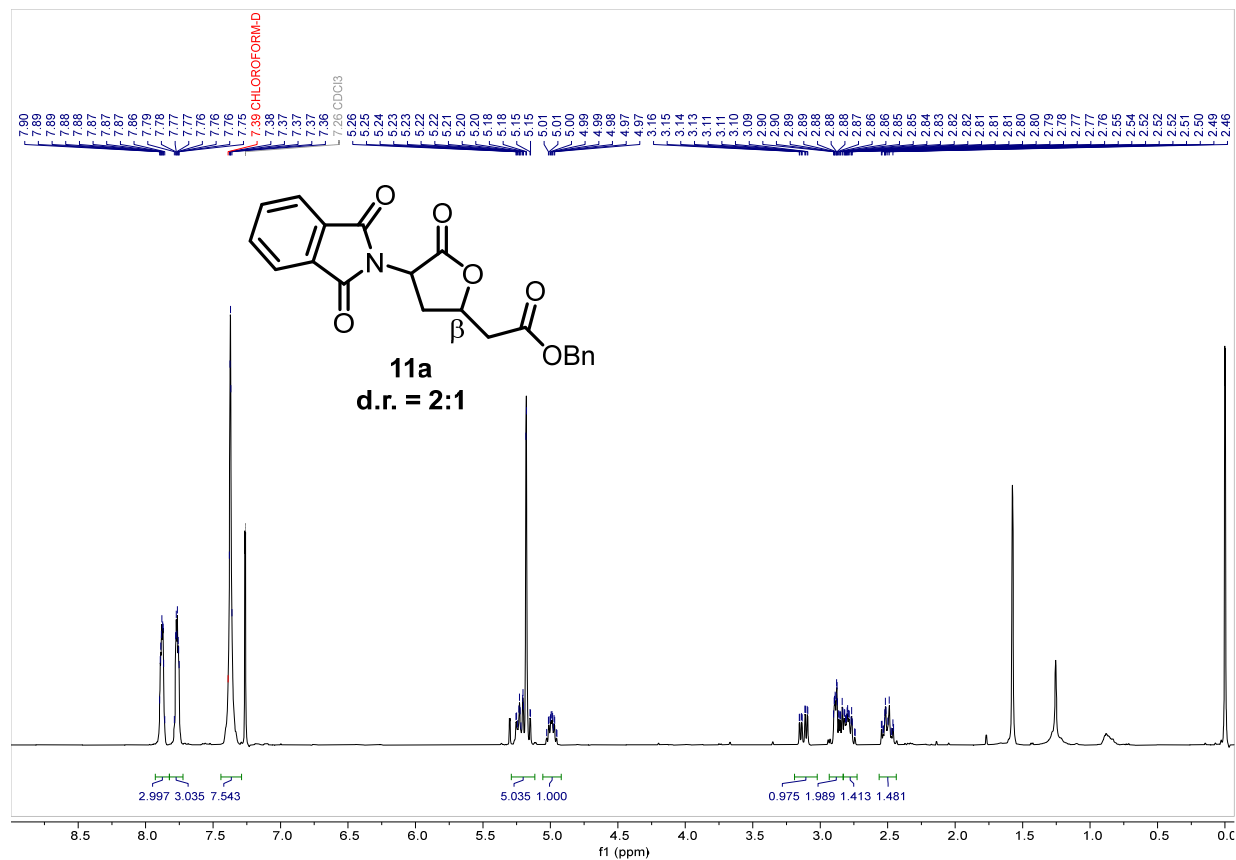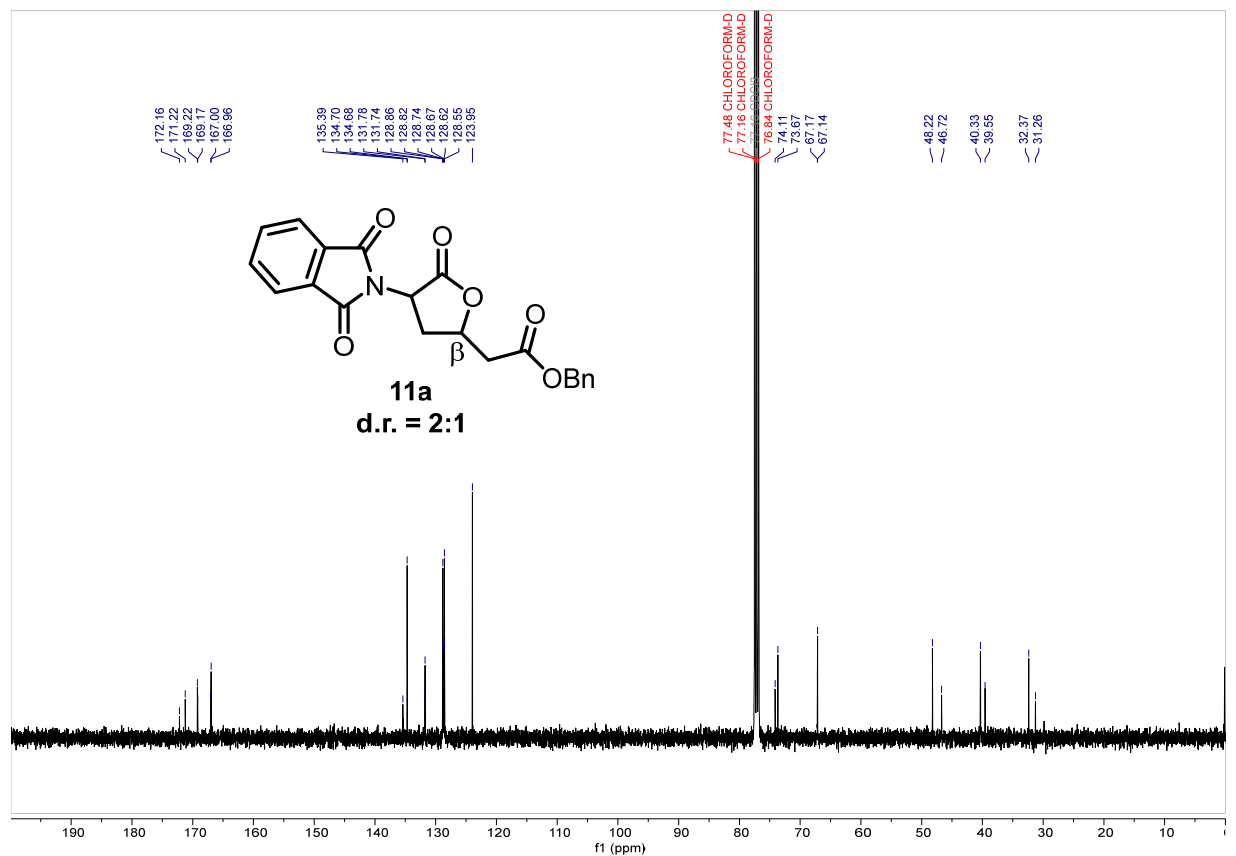

2-(4,4-Dimethyl-5-oxotetrahydrofuran-2-yl)acetic acid **12a**

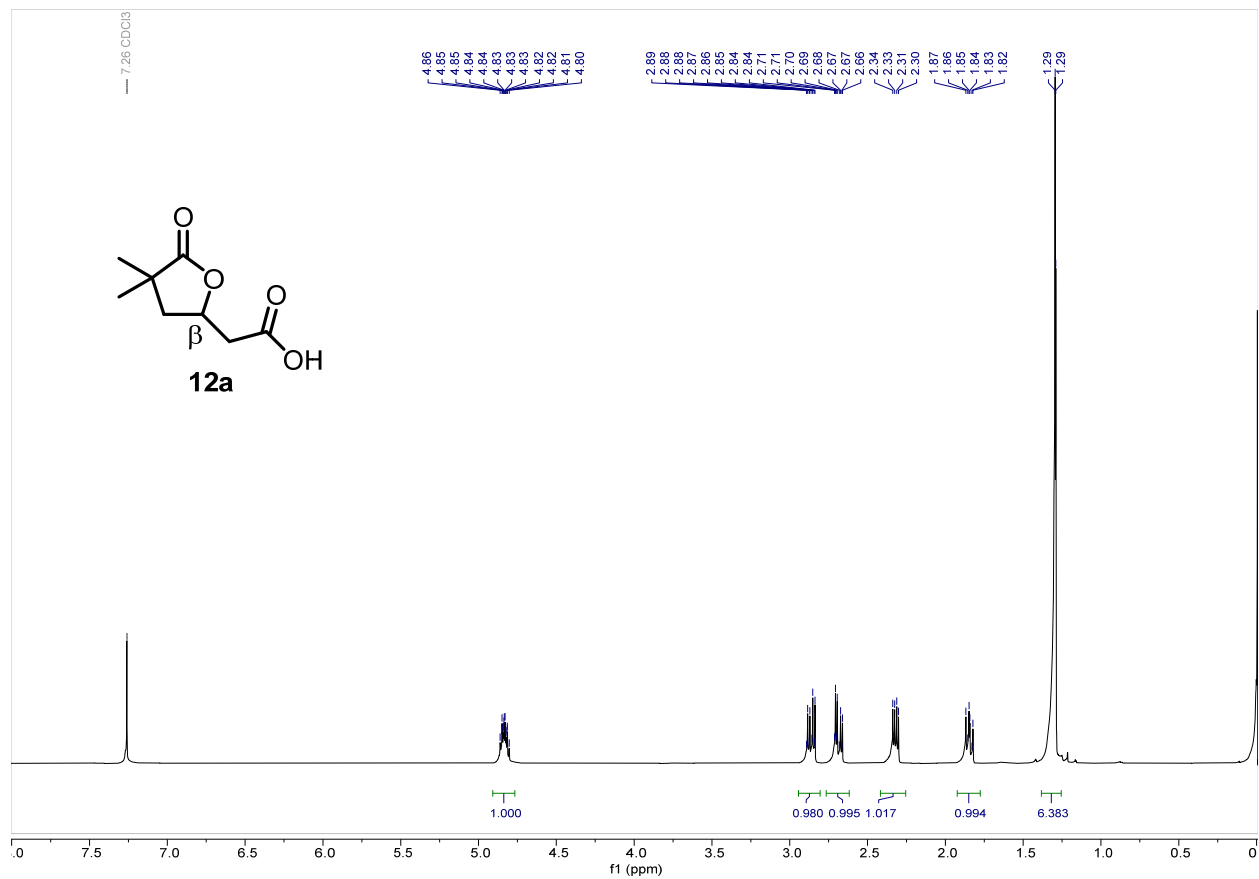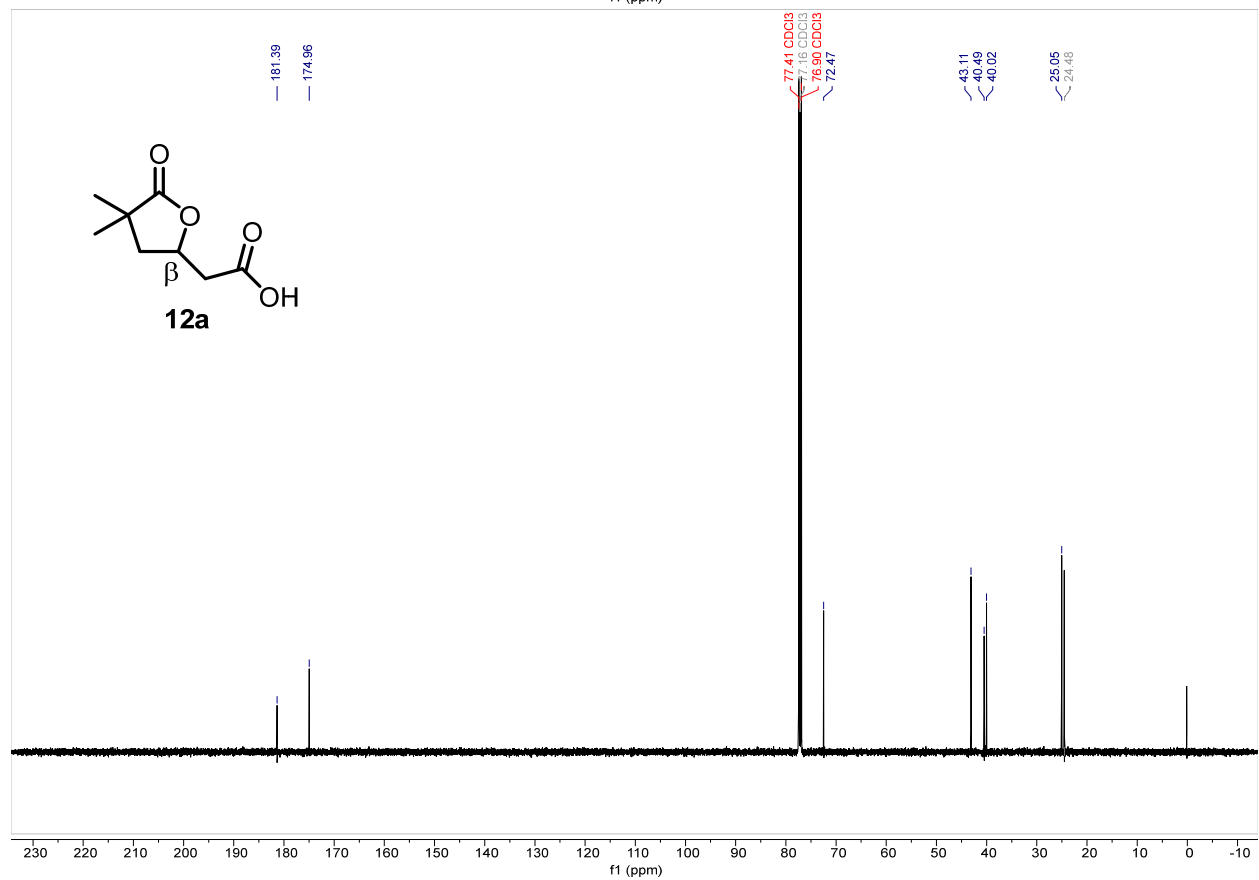

## 2-(4,4-Diethyl-5-oxotetrahydrofuran-2-yl)acetic acid **13a**

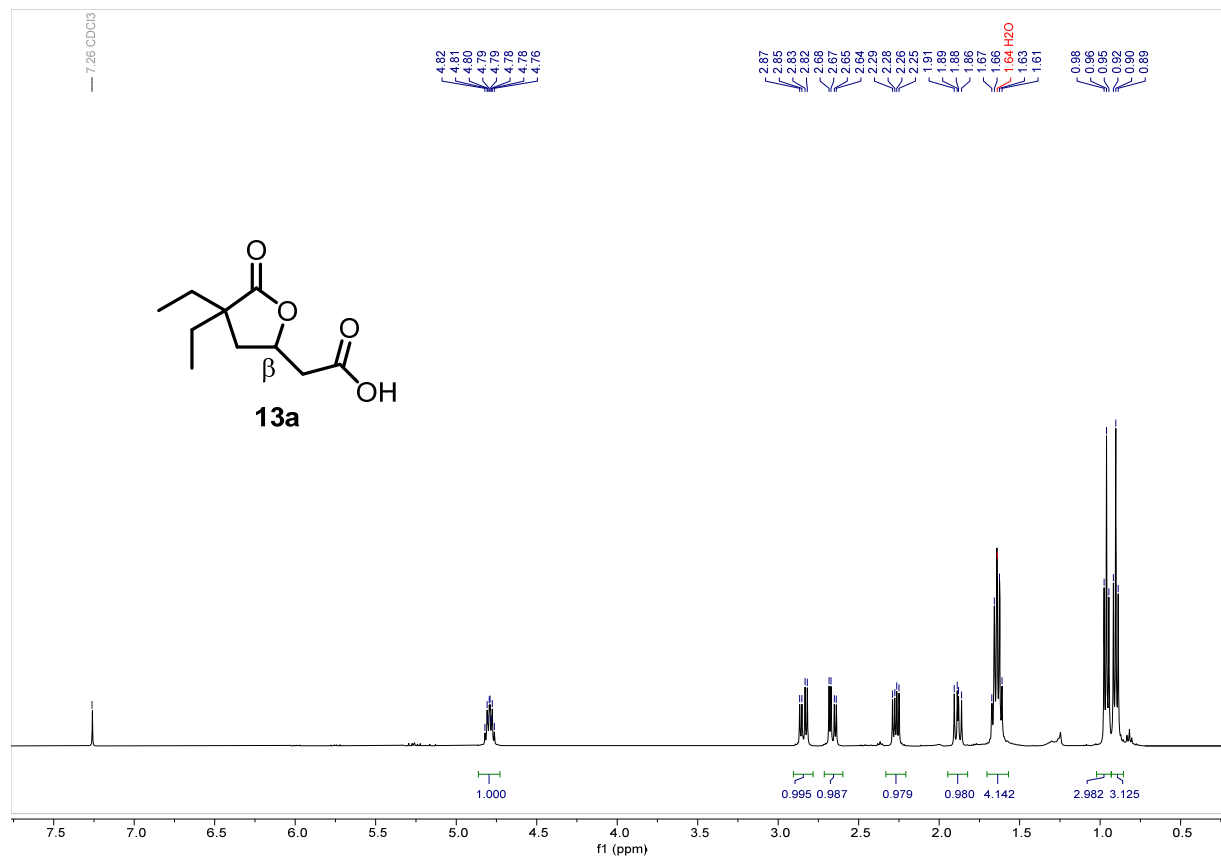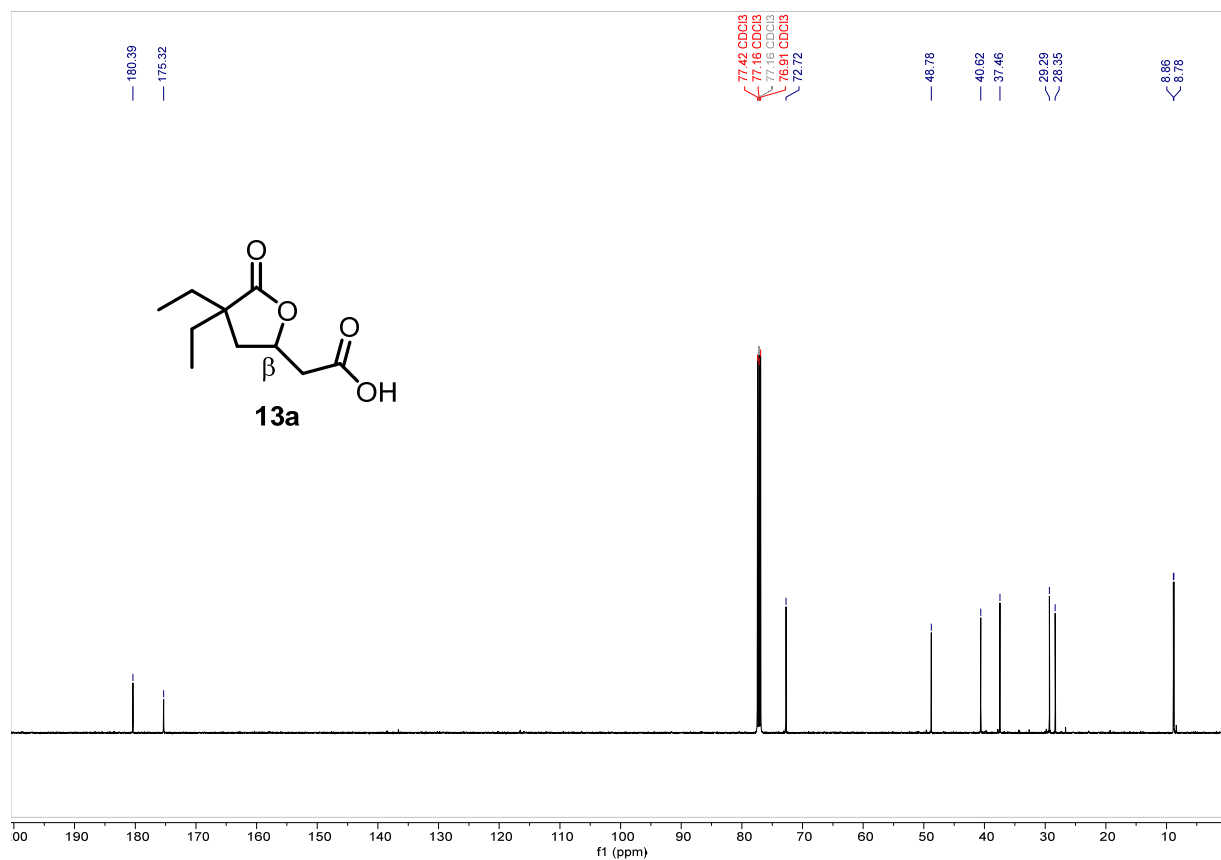

# Benzyl 2-((2*R*\*,3*S*\*)-3-methyl-5-oxotetrahydrofuran-2-yl)acetate 14a

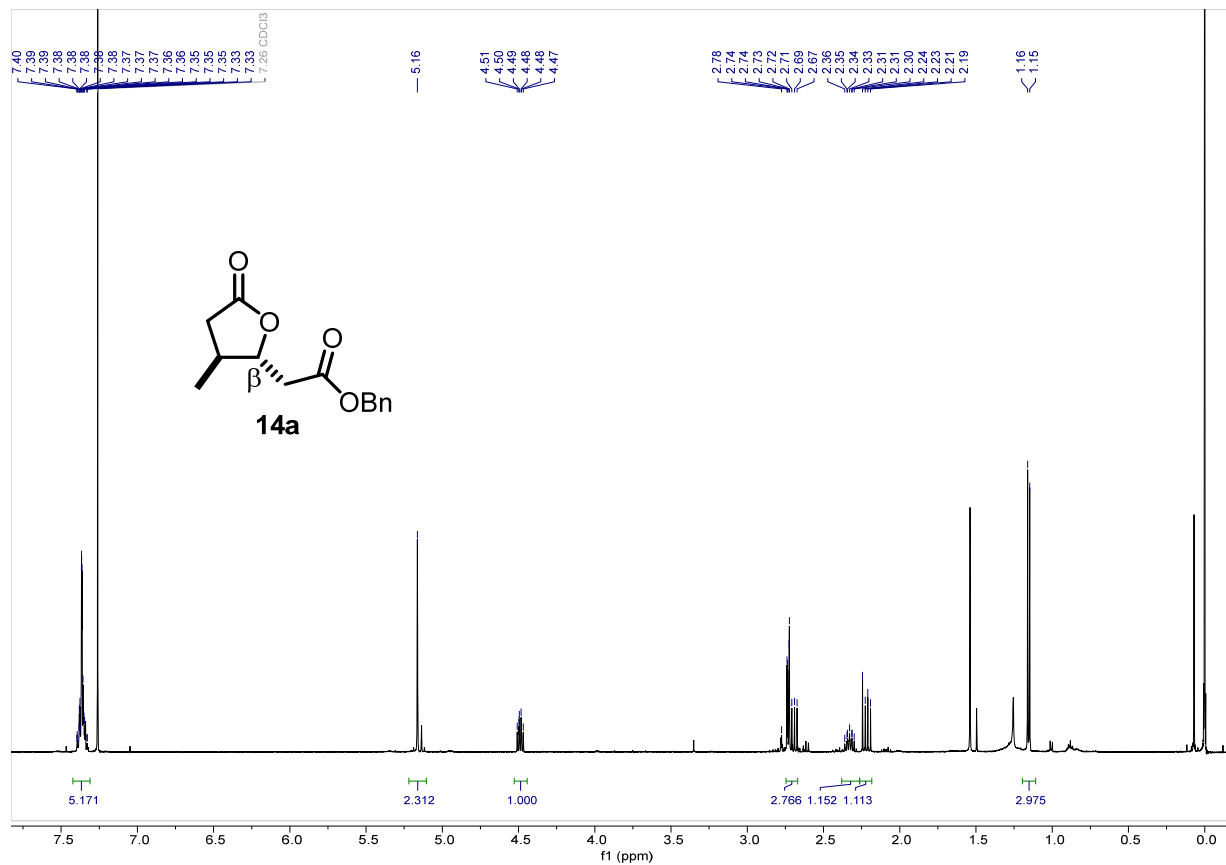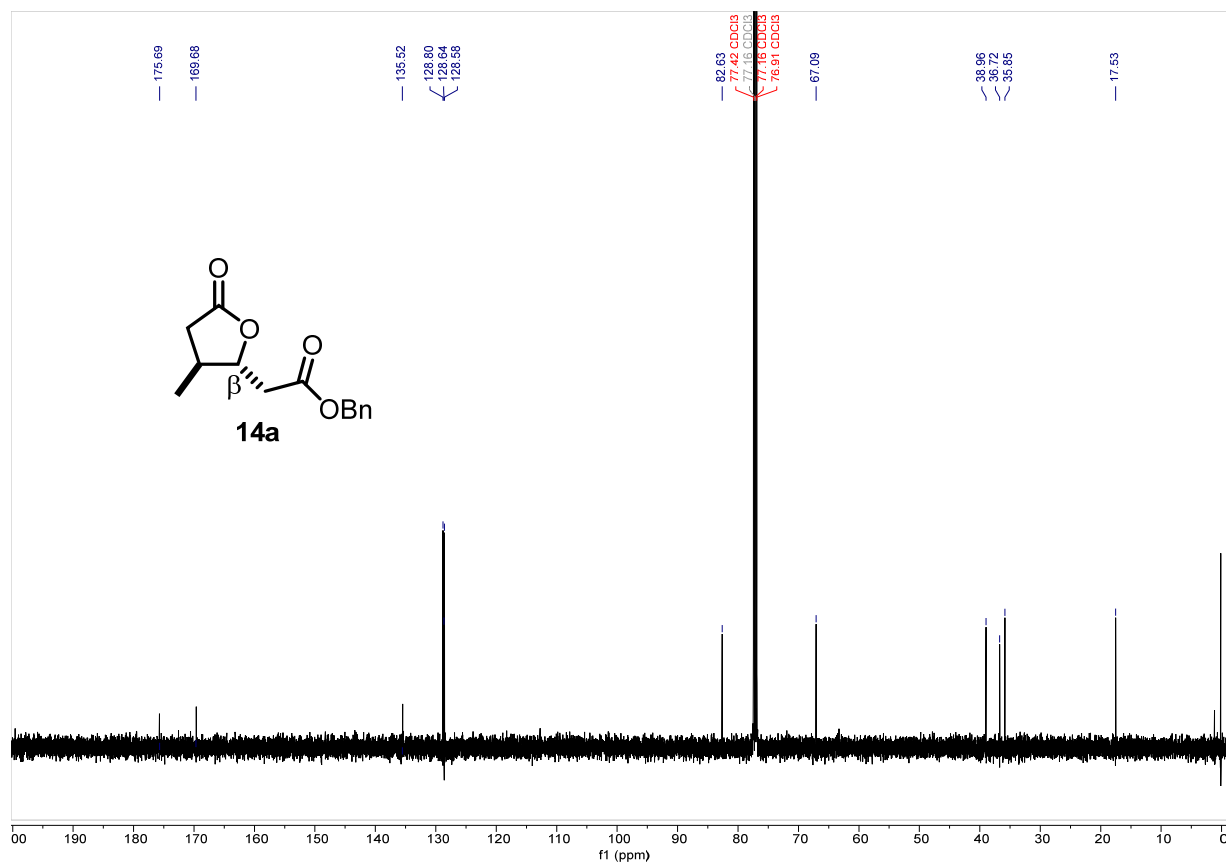

# Benzyl 2-((2*R*\*,3*R*\*)-3-(*tert*-butyl)-5-oxotetrahydrofuran-2-yl)acetate 15a

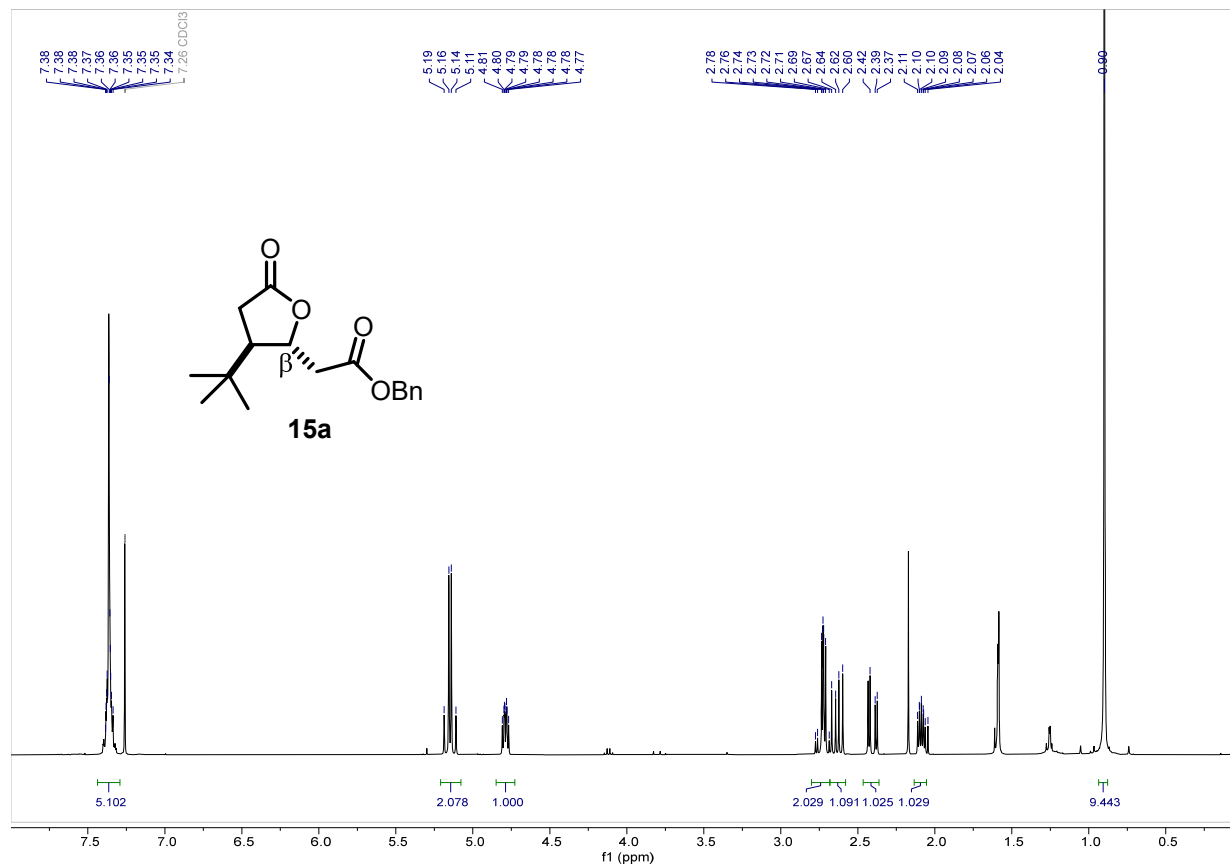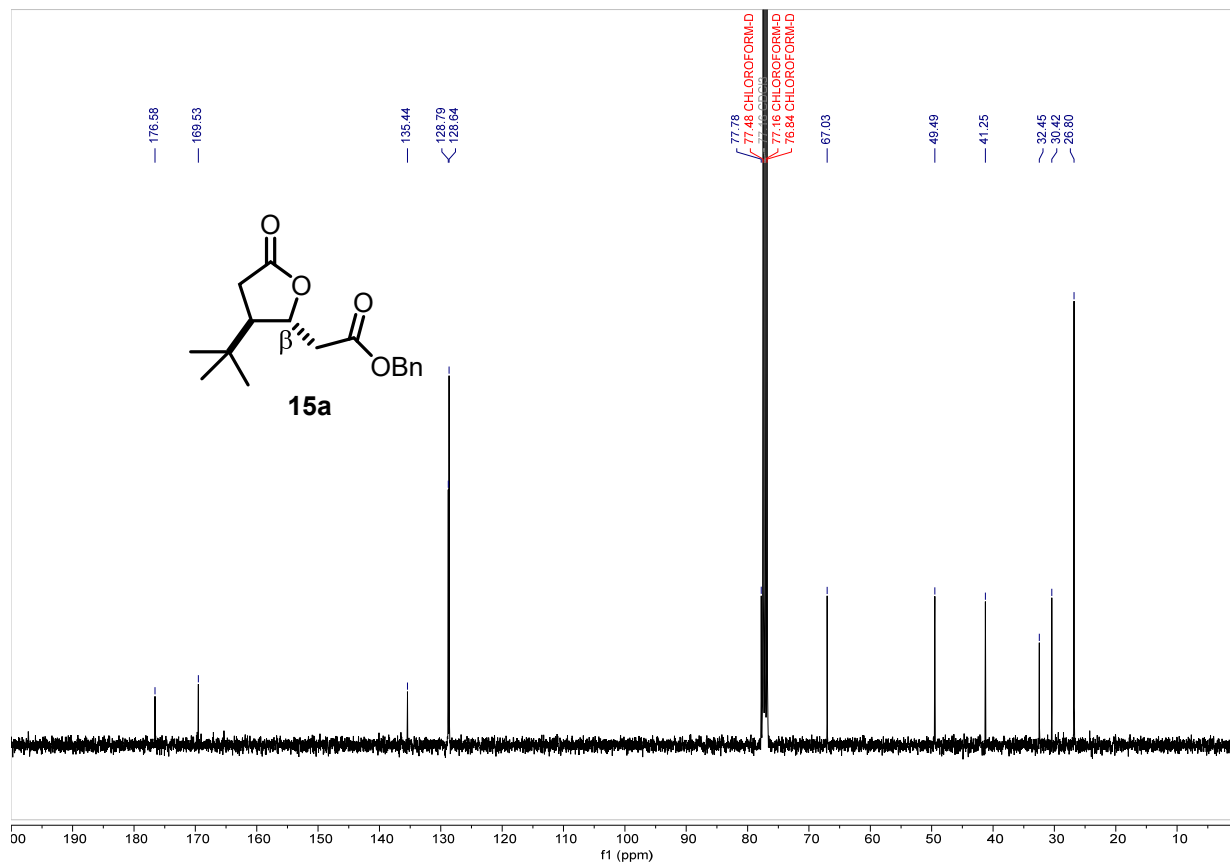

2-(4-Oxo-5-oxaspiro[2.4]heptan-6-yl)acetic acid 16a

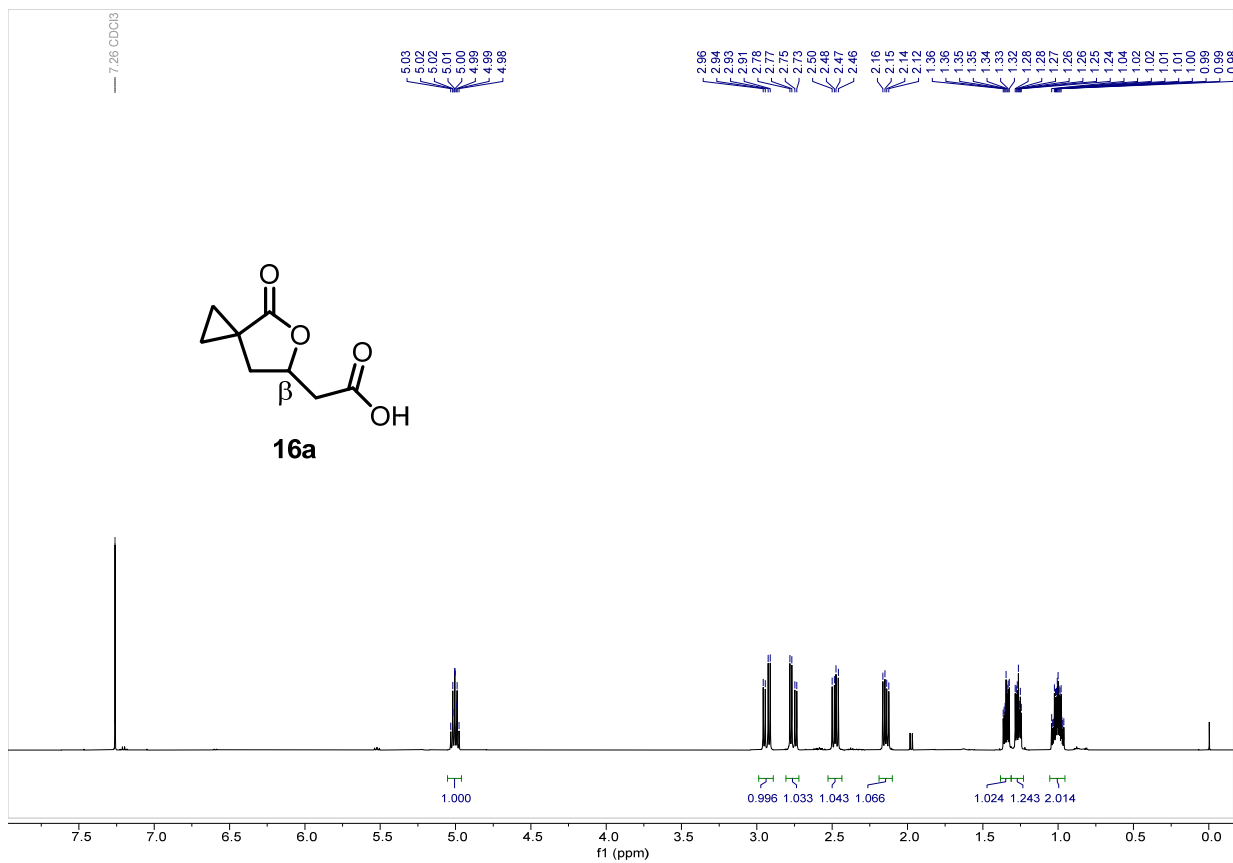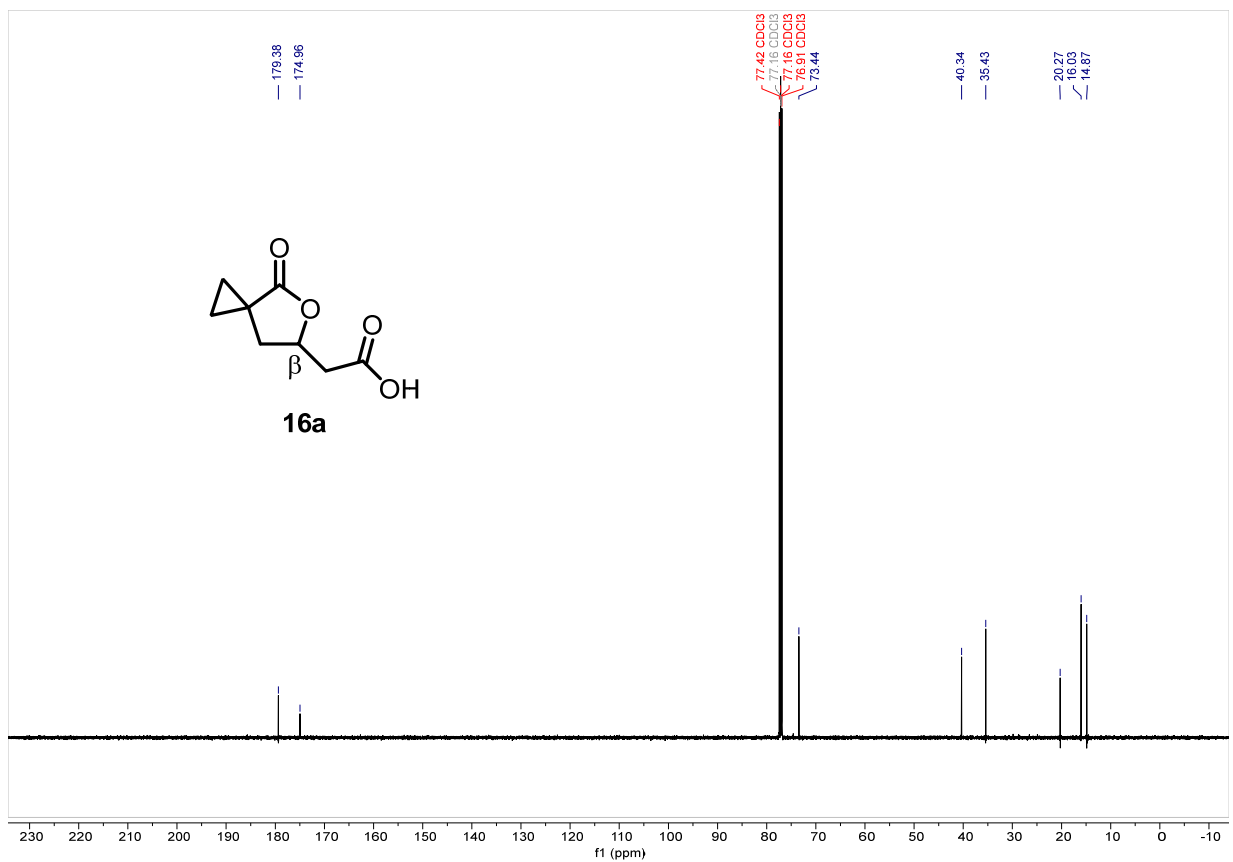



2-(5-Oxo-6-oxaspiro[3.4]octan-7-yl)acetic acid 17a

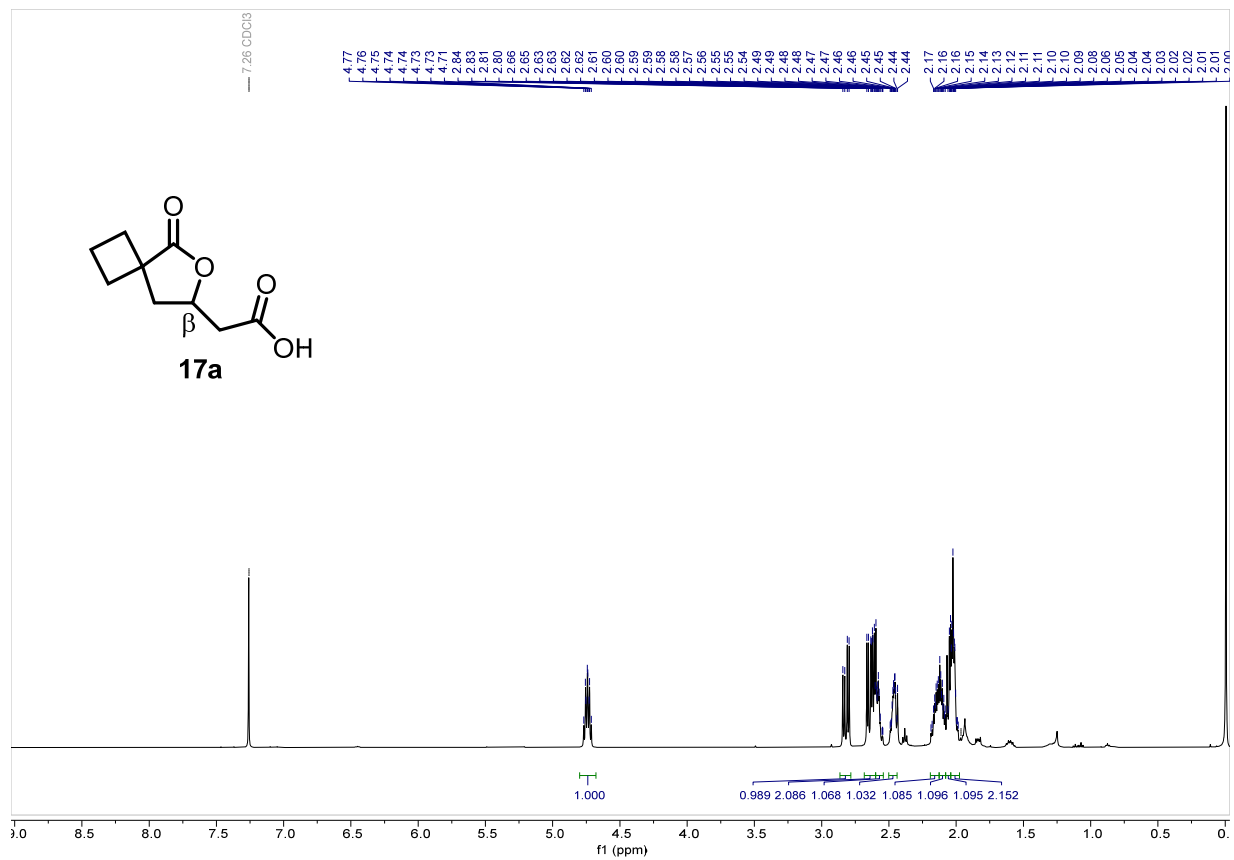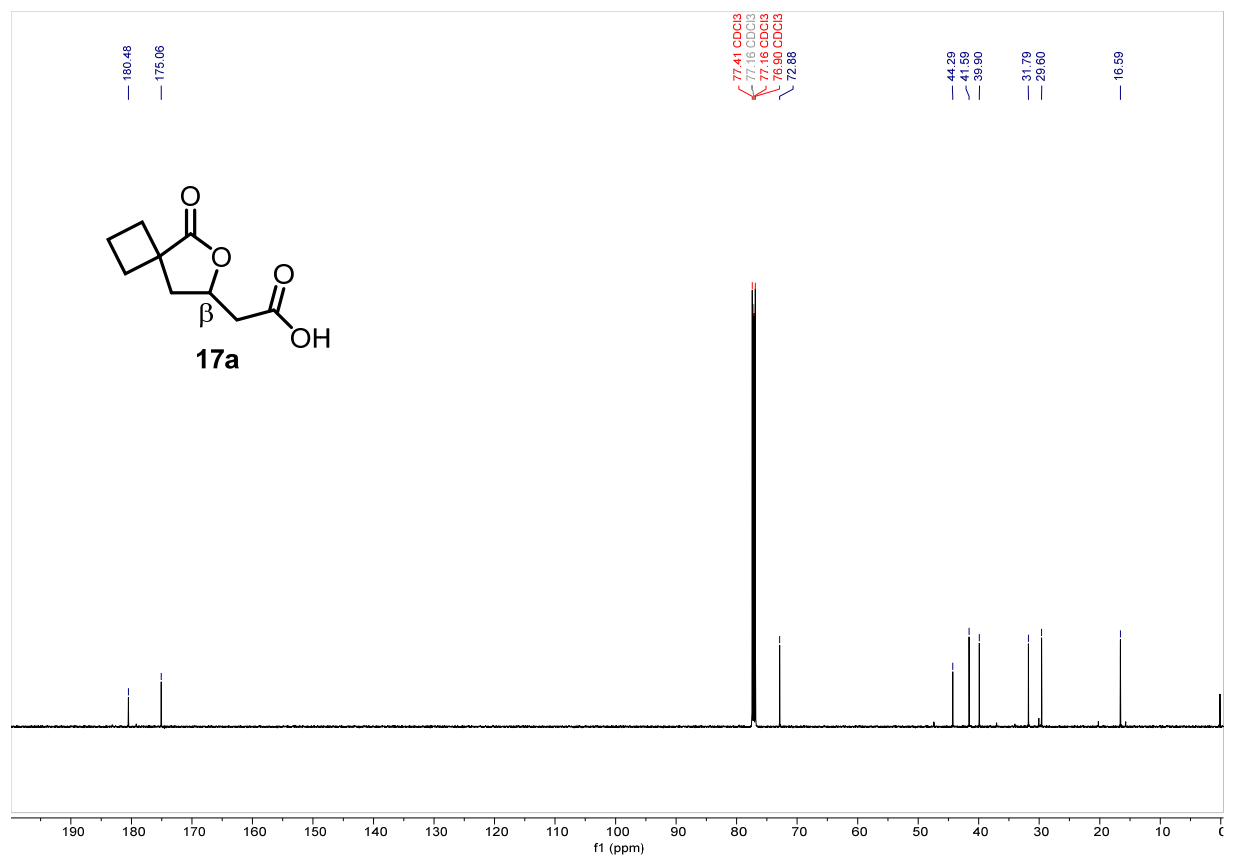

# Benzyl 2-(1-Oxo-2-oxaspiro[4.4]nonan-3-yl)acetate 18a

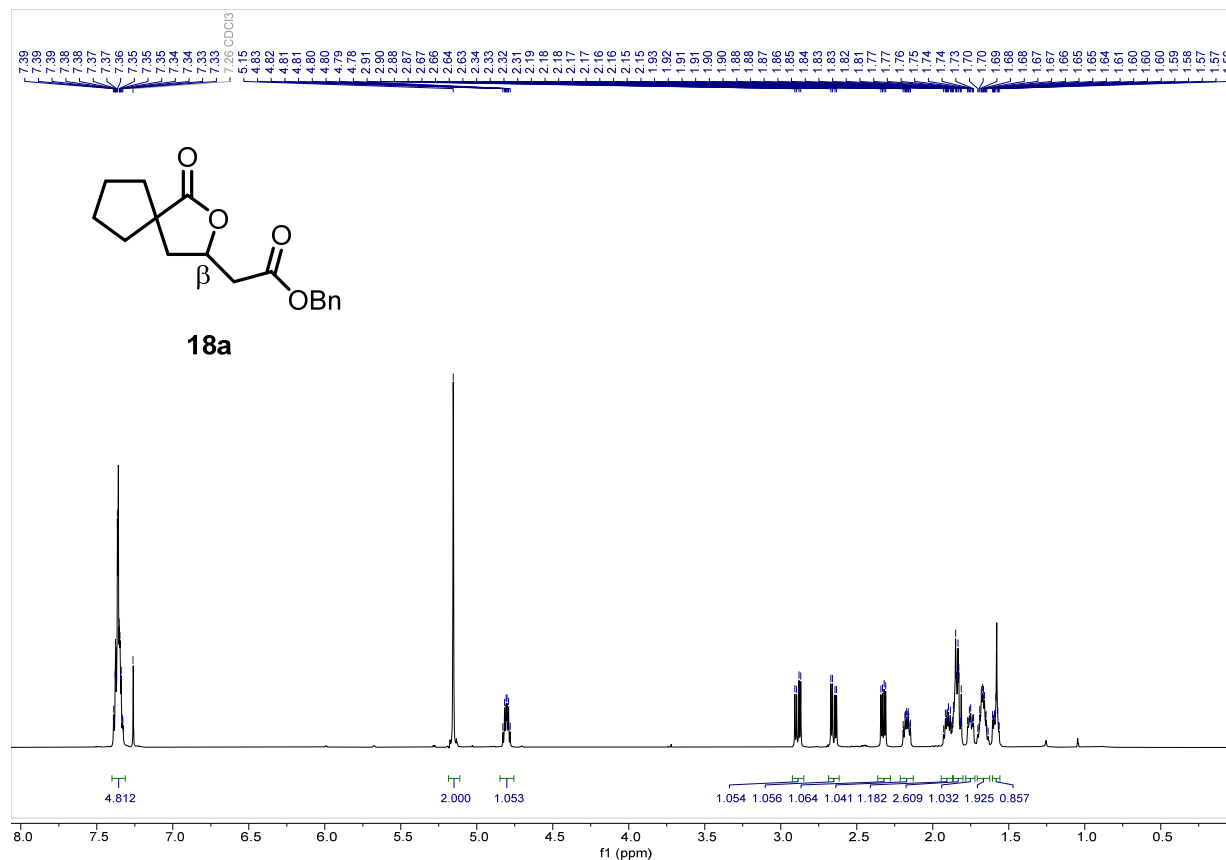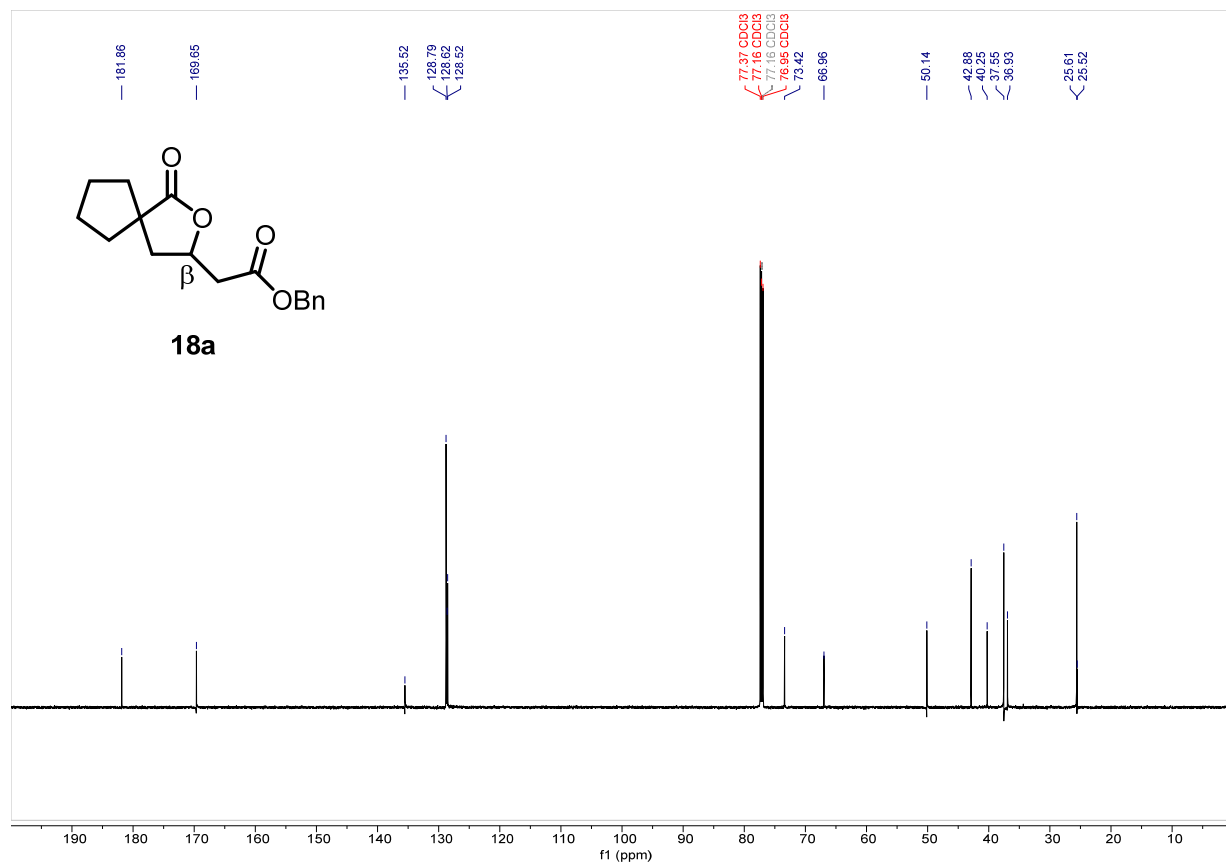

# Benzyl 2-(1-oxo-2-oxaspiro[4.5]decan-3-yl)acetate 19a

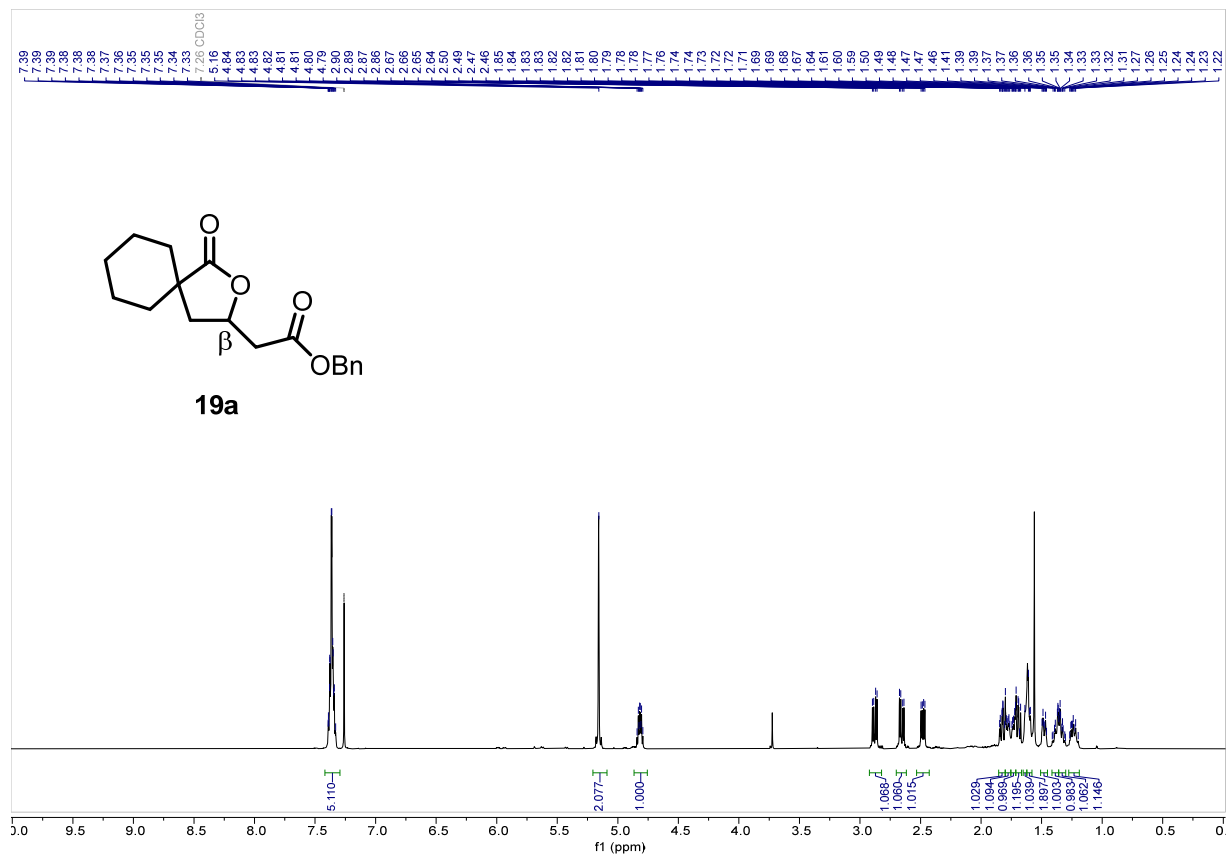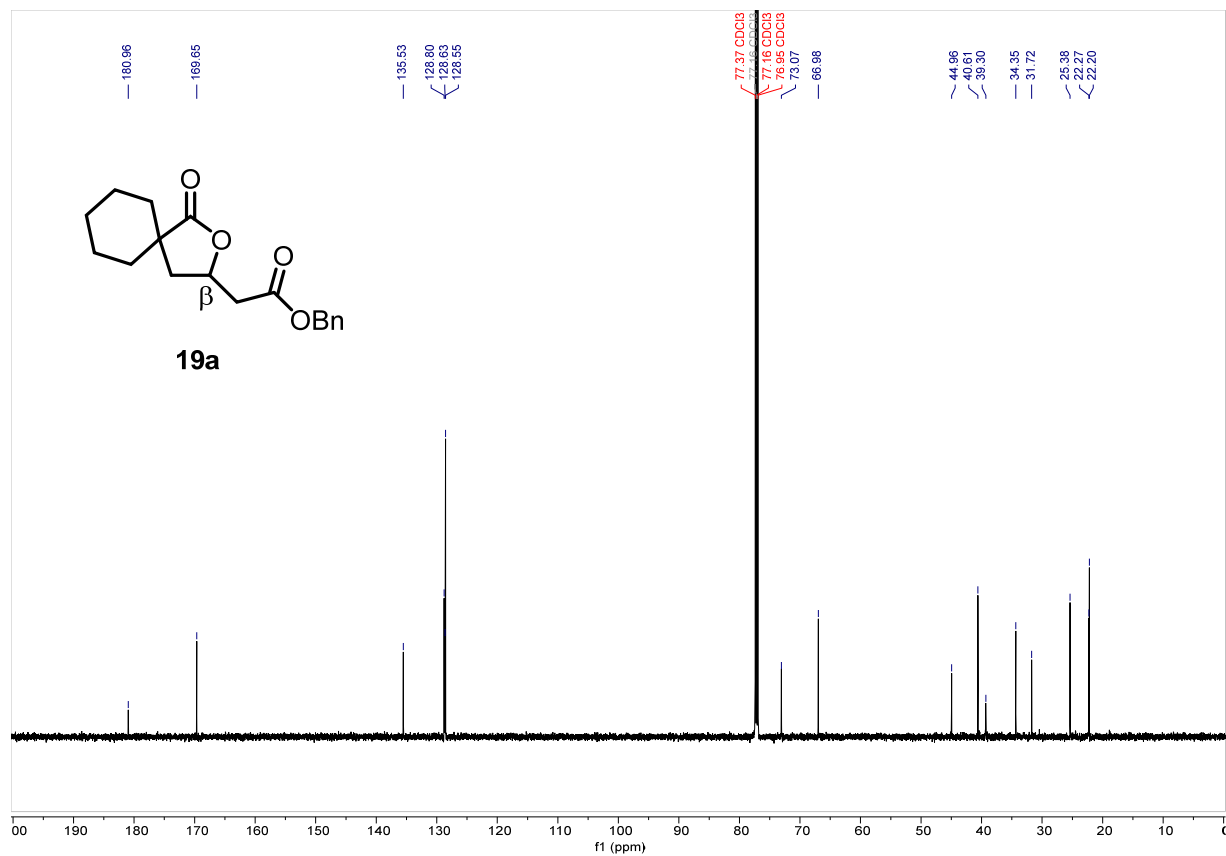

**2-(8-(*tert*-Butyl)-1-oxo-2-oxaspiro[4.5]decan-3-yl)acetic acid 20a**

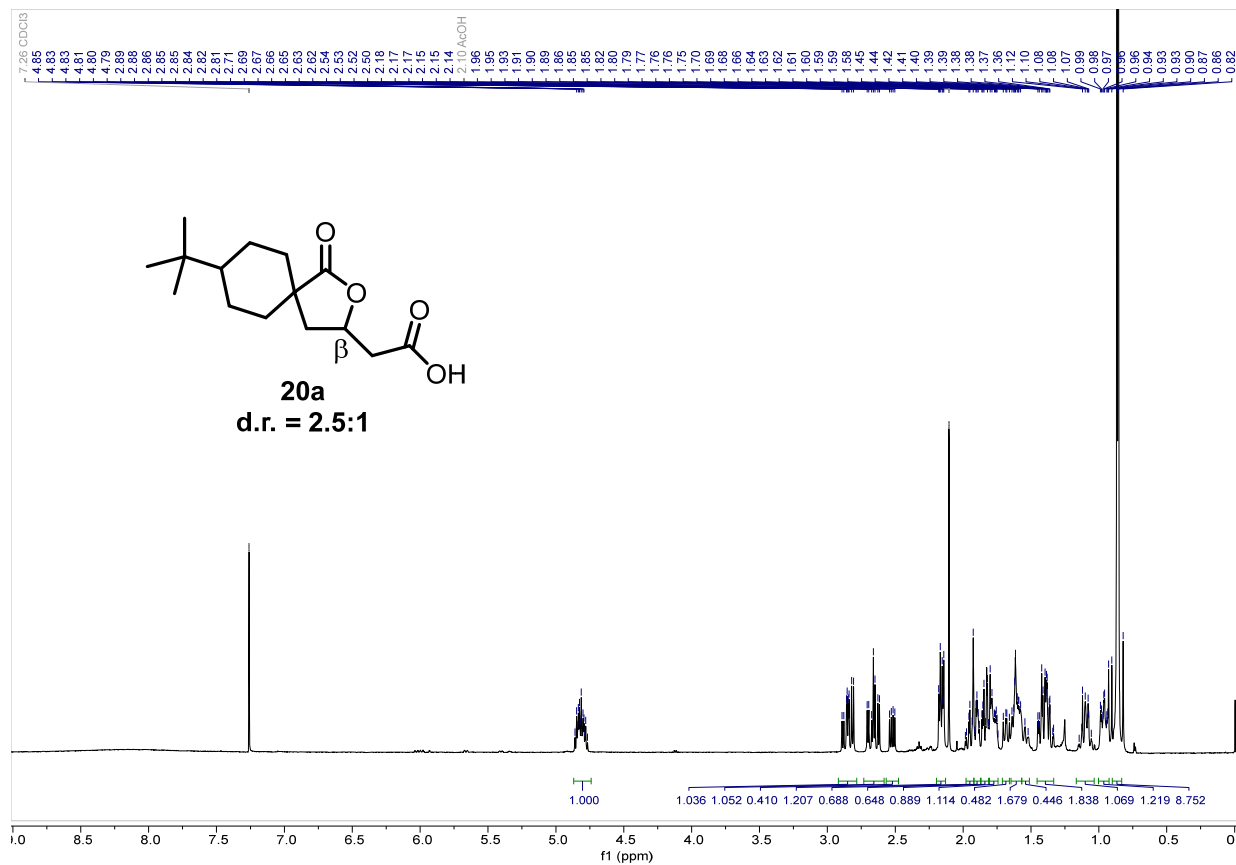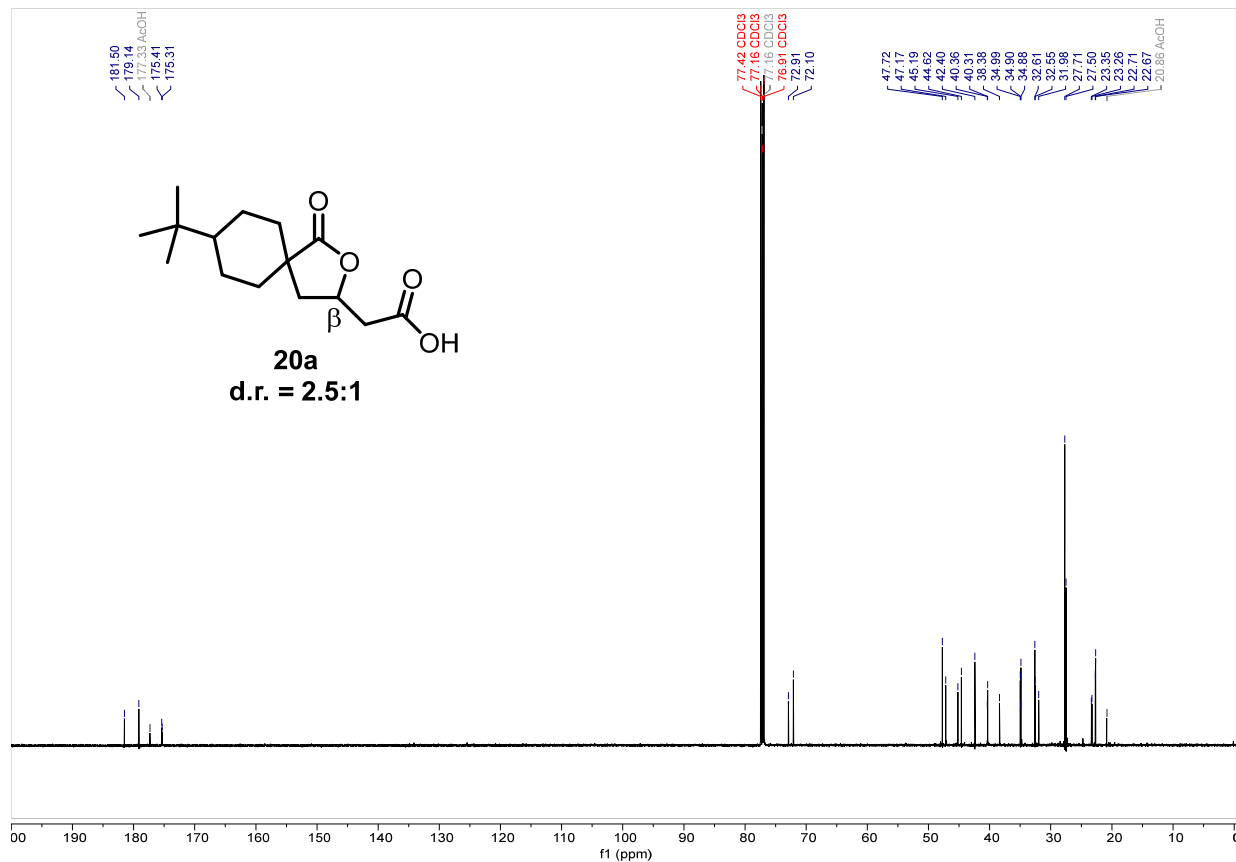

## 2-(1-Oxo-2,8-dioxaspiro[4.5]decan-3-yl)acetic acid 21a

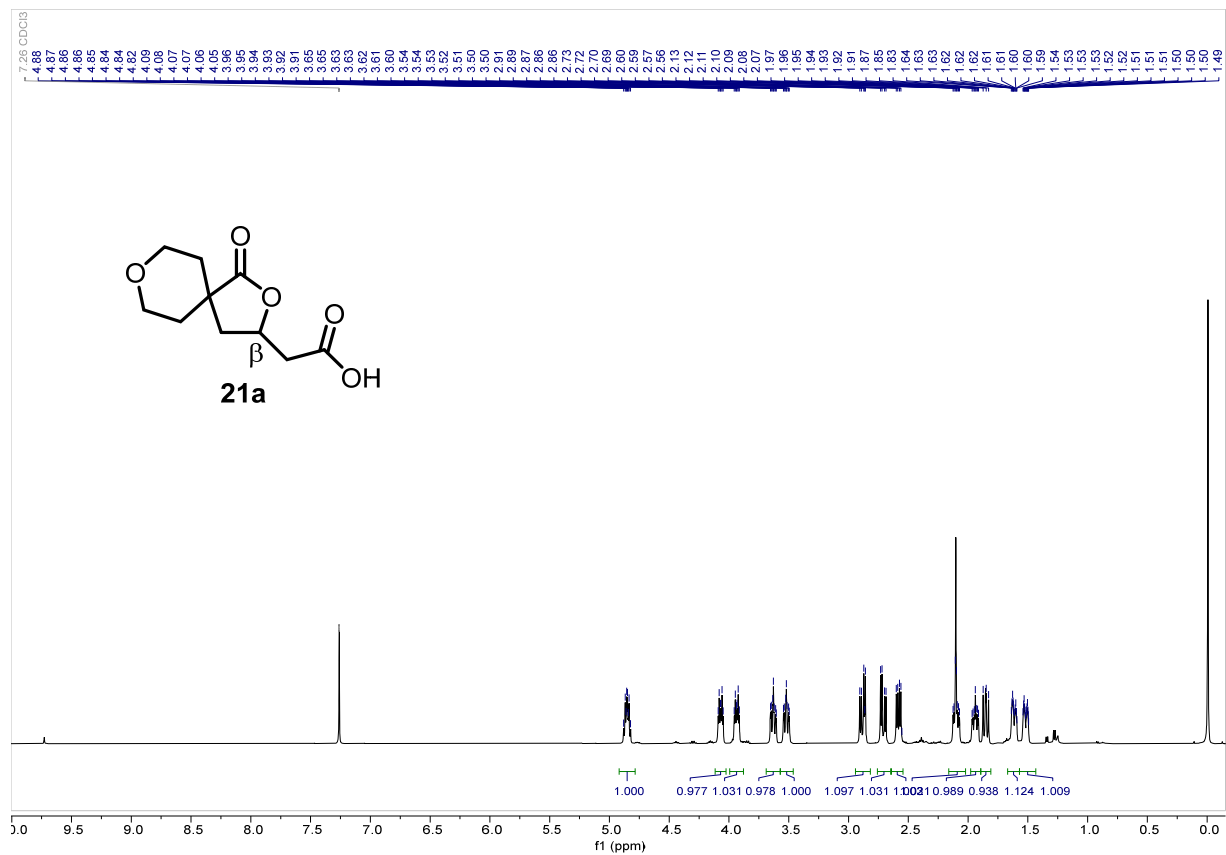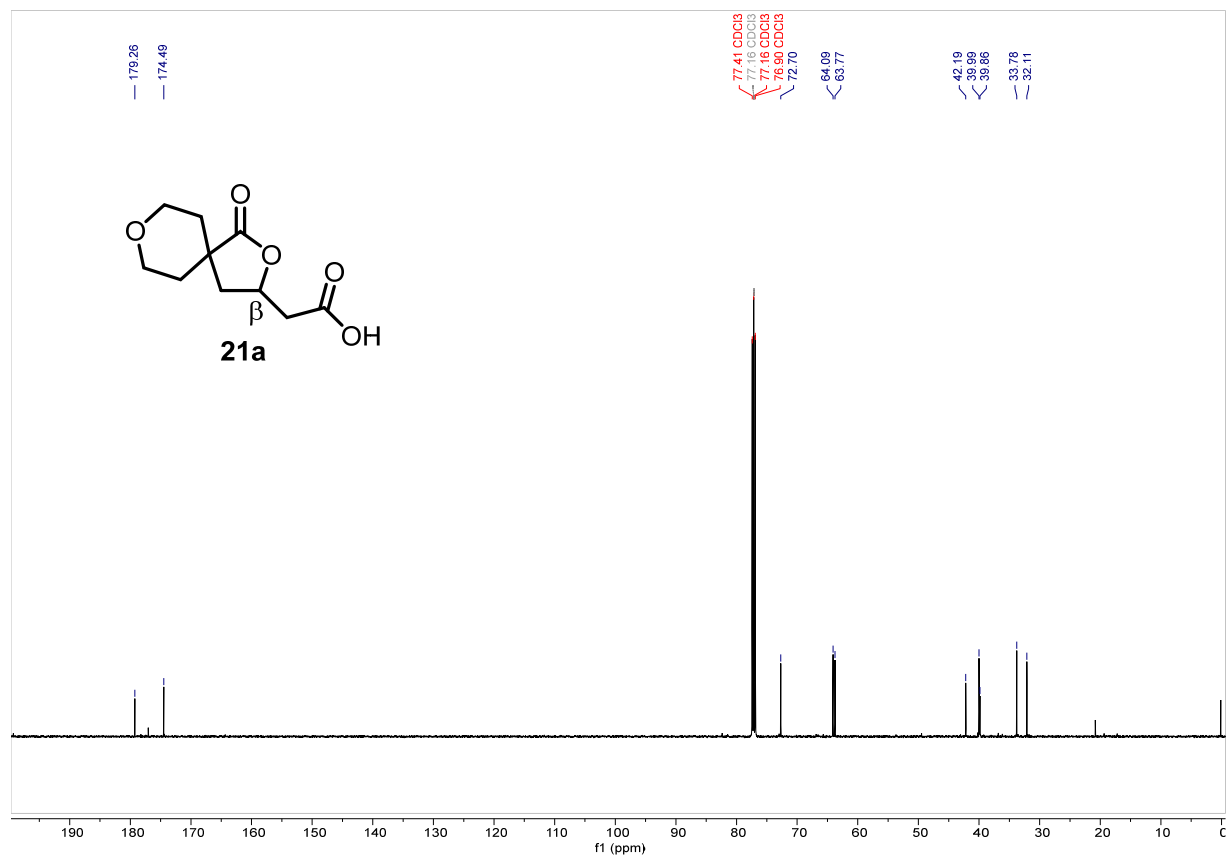

# Benzyl 2-(3-oxo-1,3-dihydroisobenzofuran-1-yl)acetate 22a

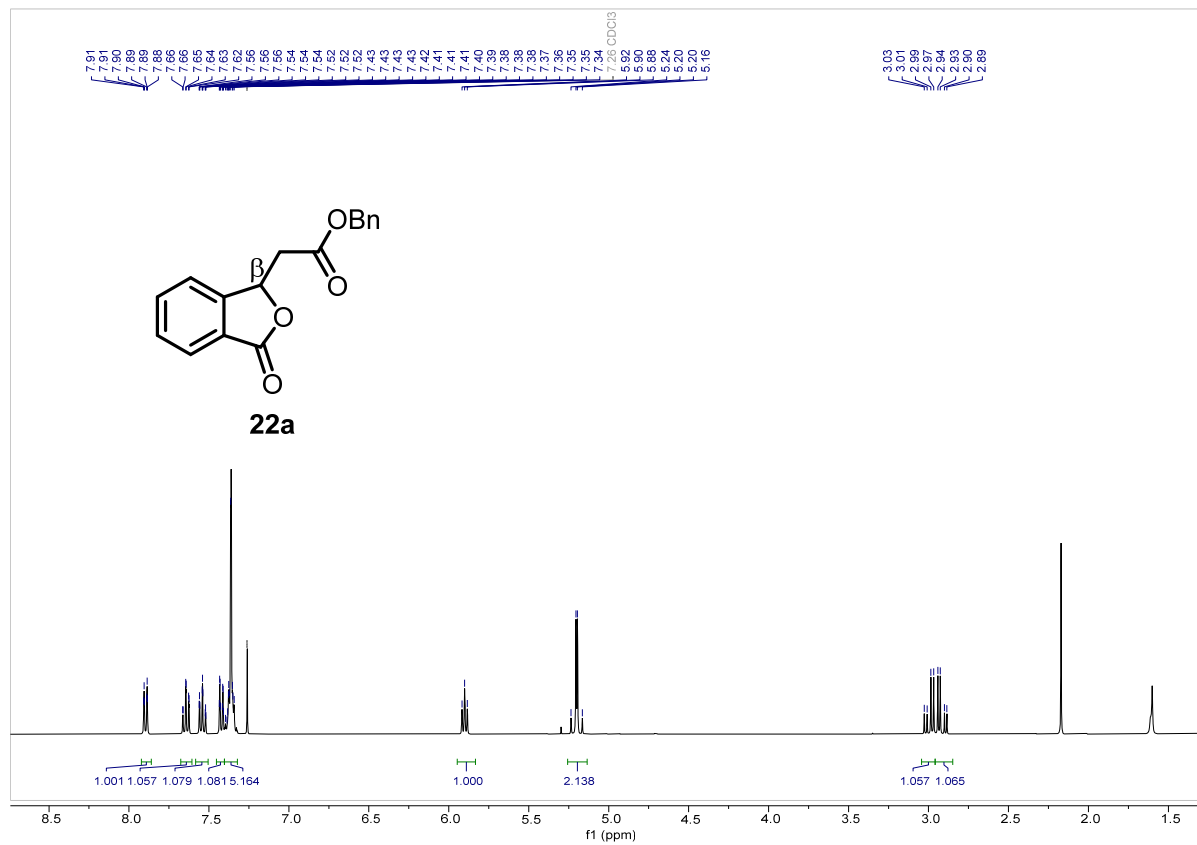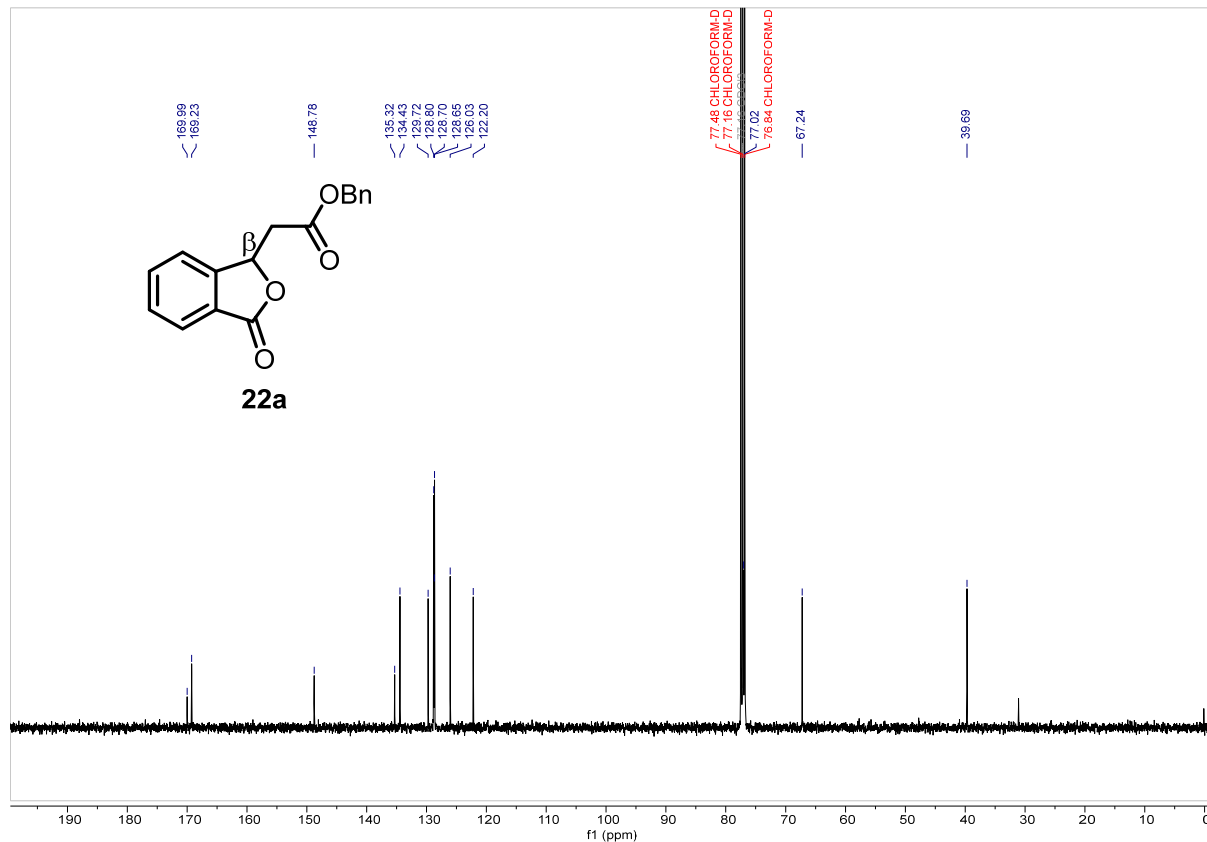

**Benzyl 2-((3a*R*\*,7a*S*\*)-3-oxooctahydroisobenzofuran-1-yl)acetate 23a**

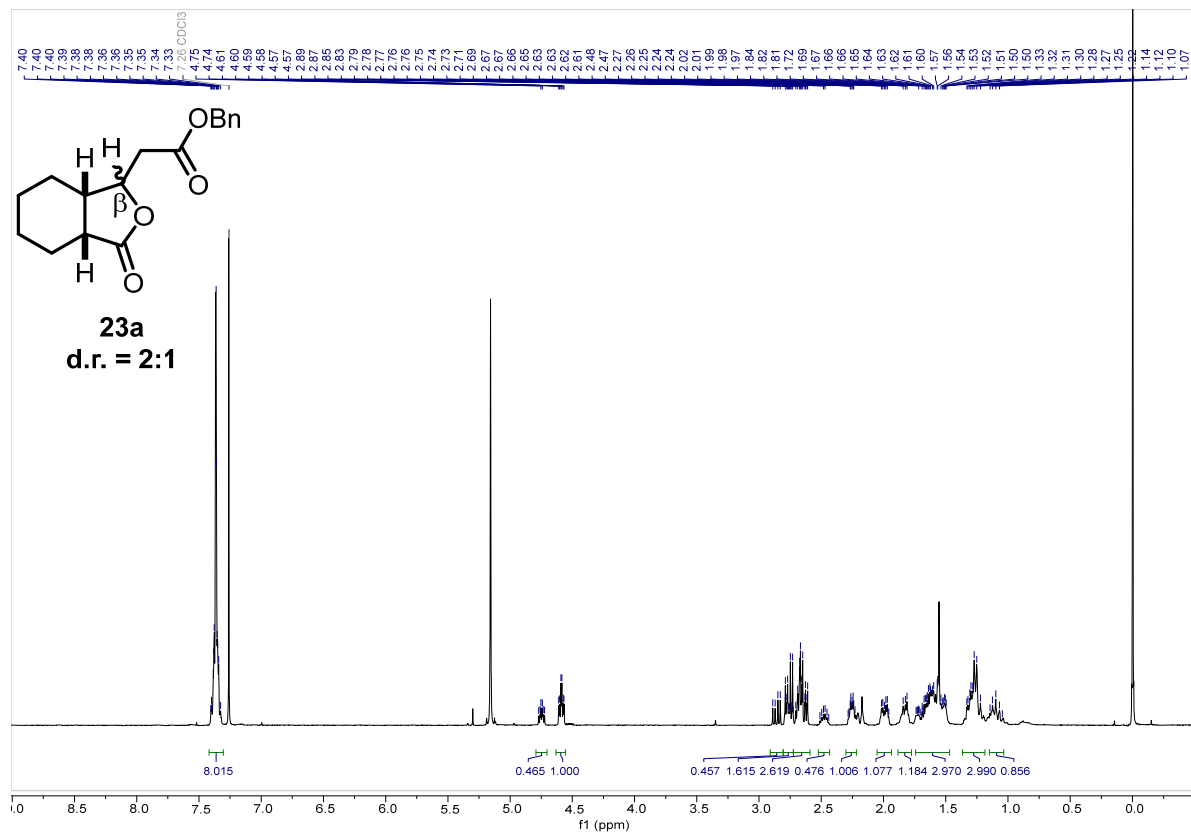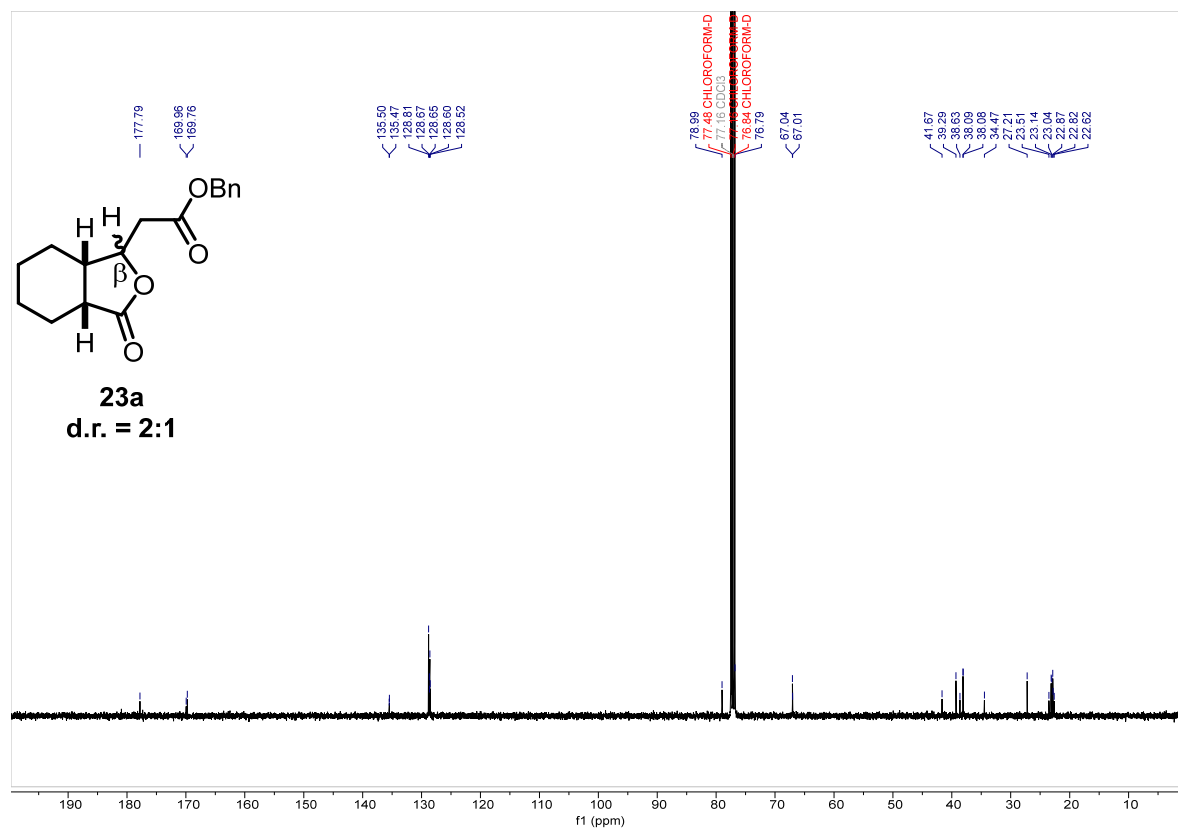

**Benzyl 2-((1*S*\*,3*aS*\*,7*aS*\*)-3-oxooctahydroisobenzofuran-1-yl)acetate 24a**

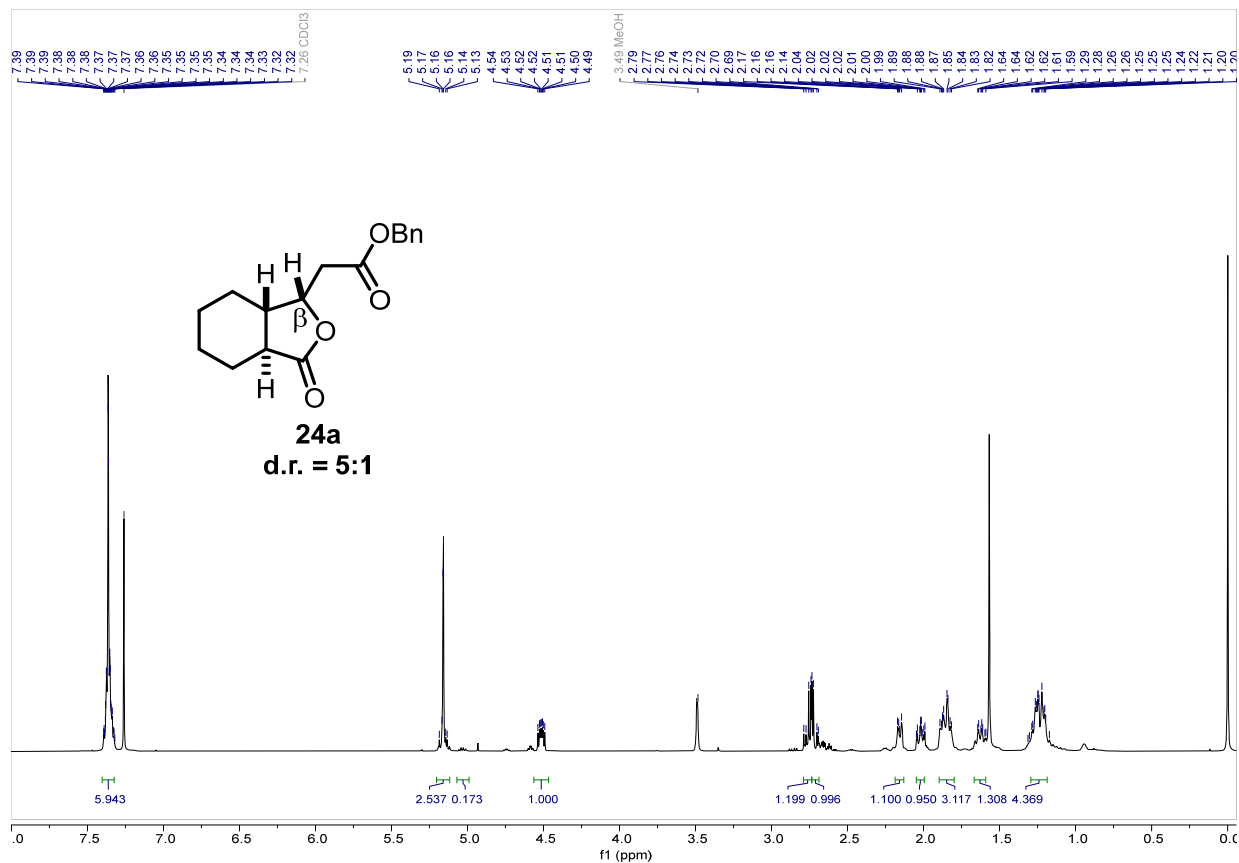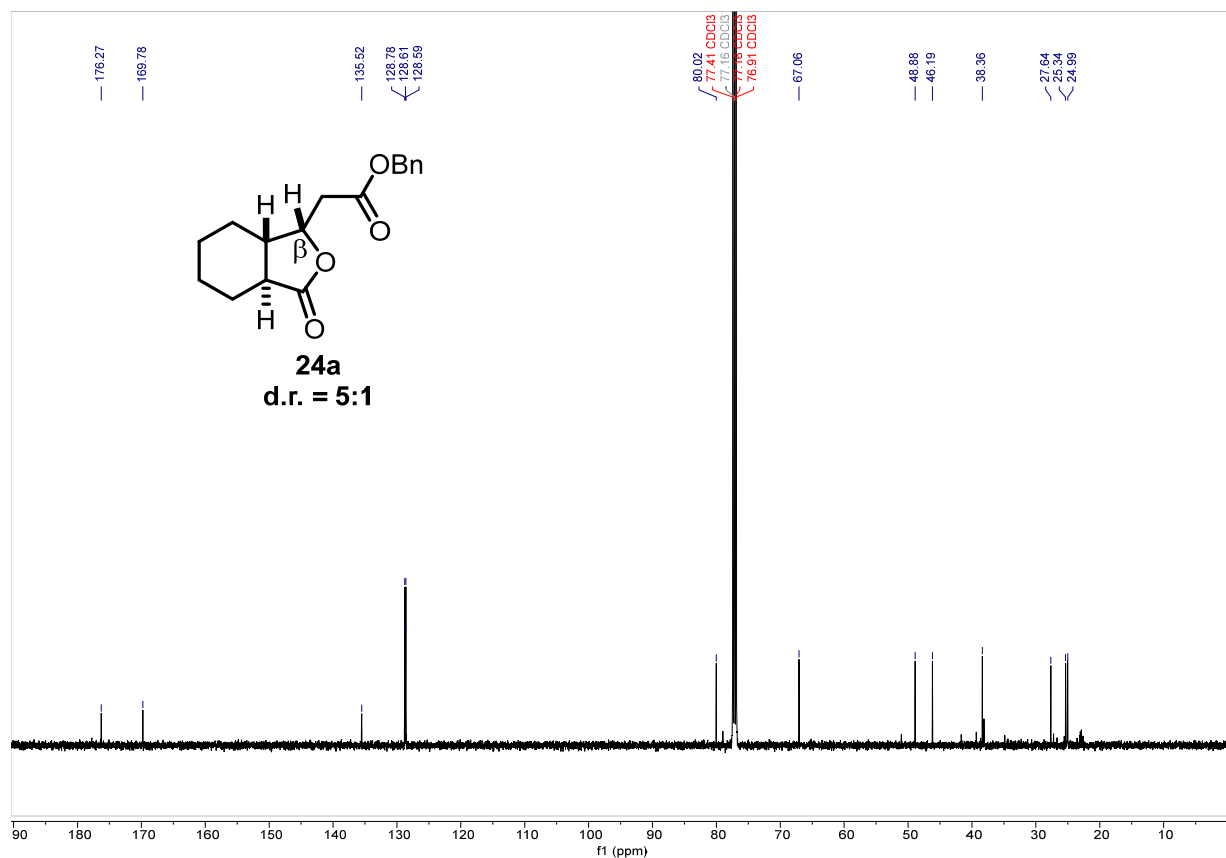



**Benzyl (3*aR*\*,6*S*\*,6*aS*\*)-2-oxohexahydro-2H-cyclopenta[b]furan-6-carboxylate 25a**

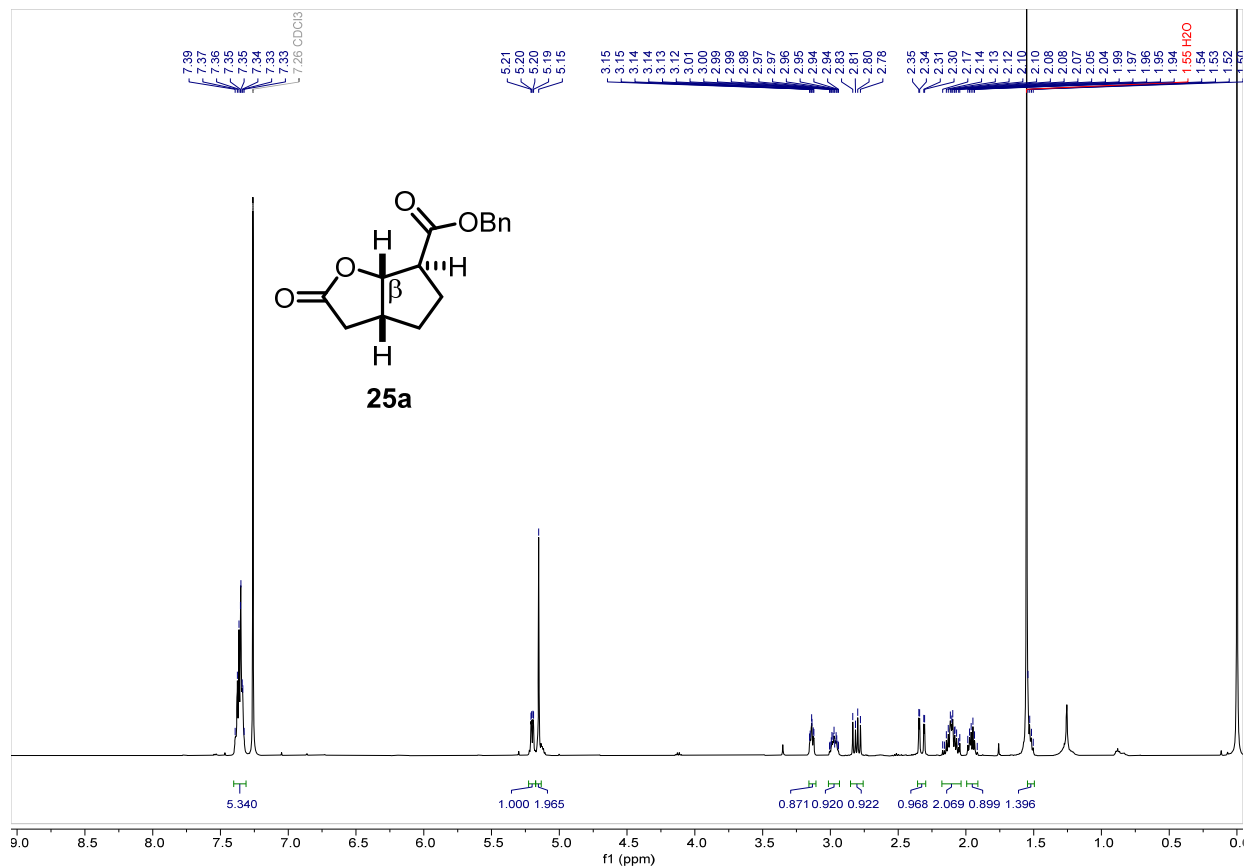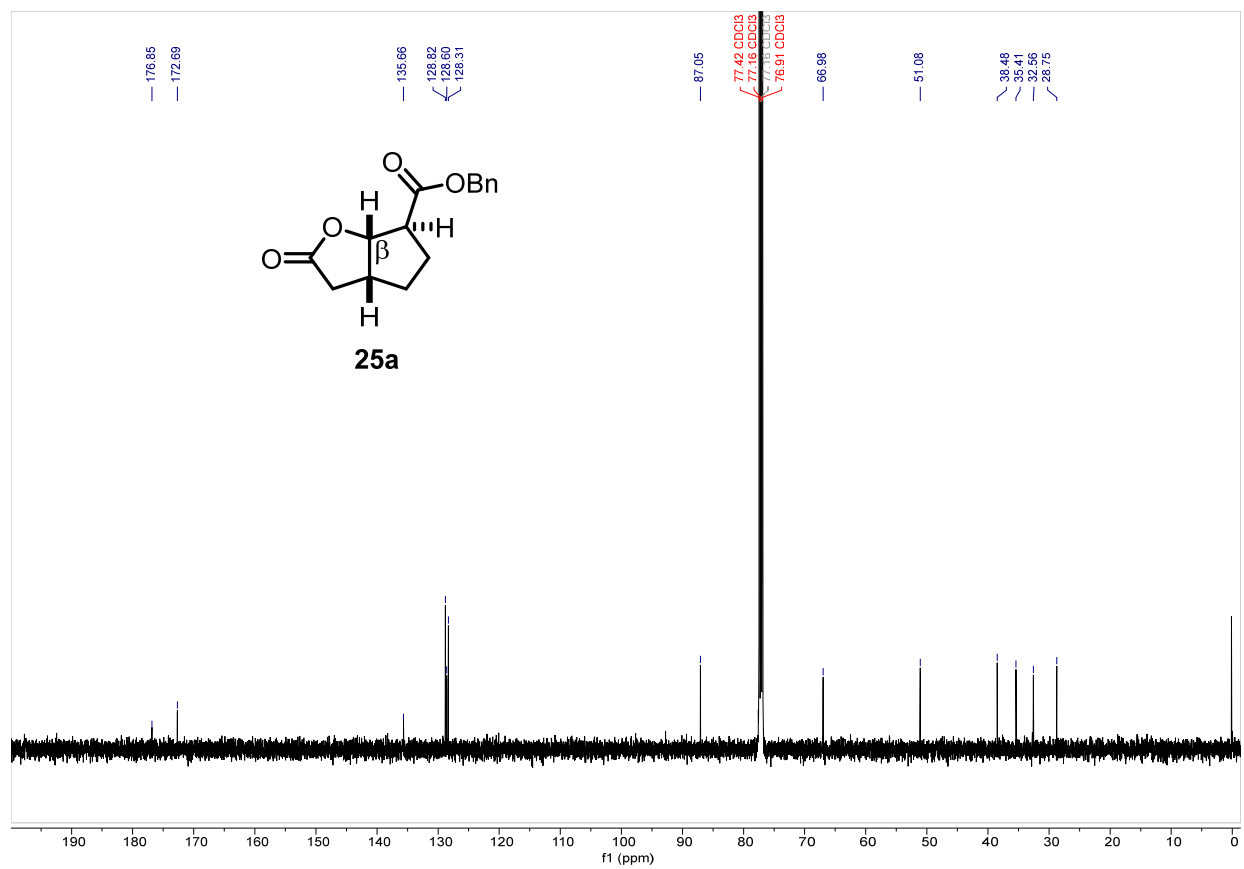



## 2-(5-Ethyl-6-oxotetrahydro-2H-pyran-2-yl)acetic acid **26a**

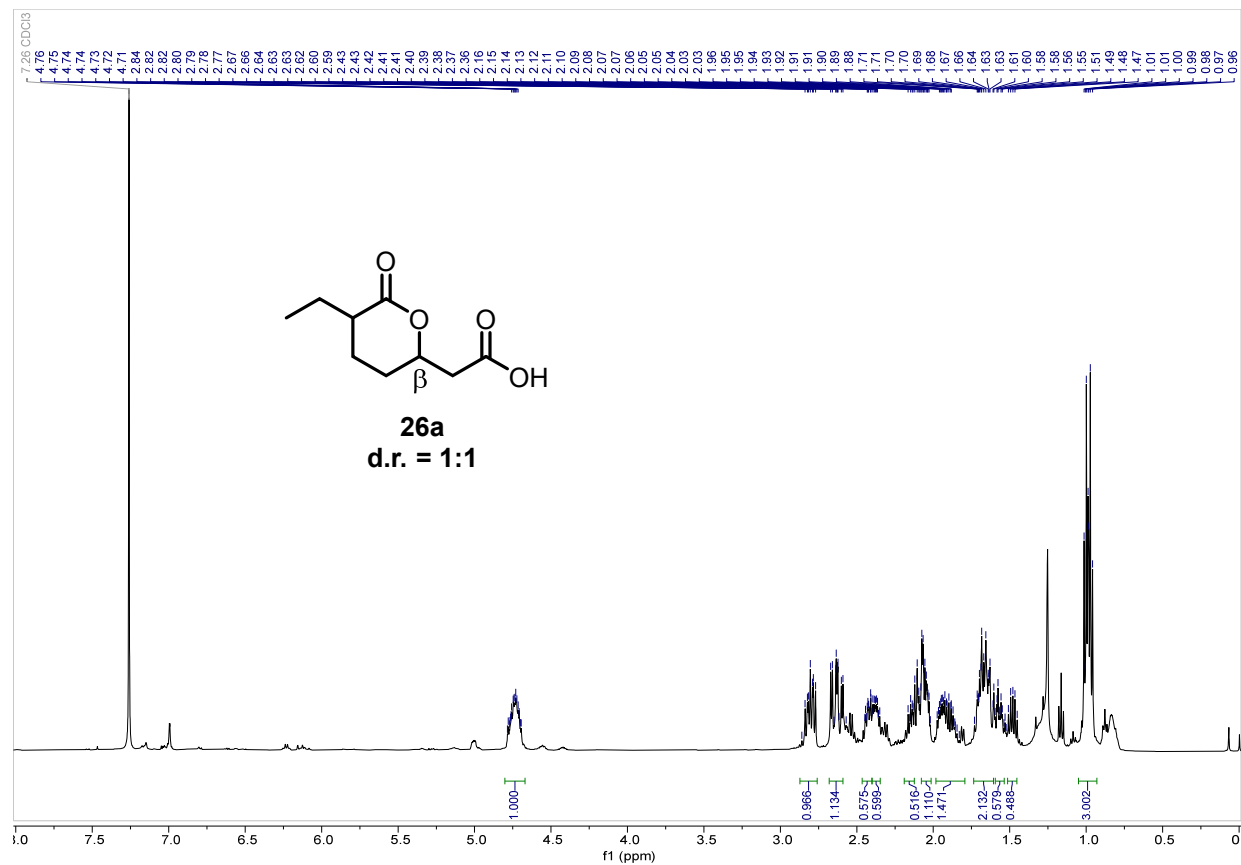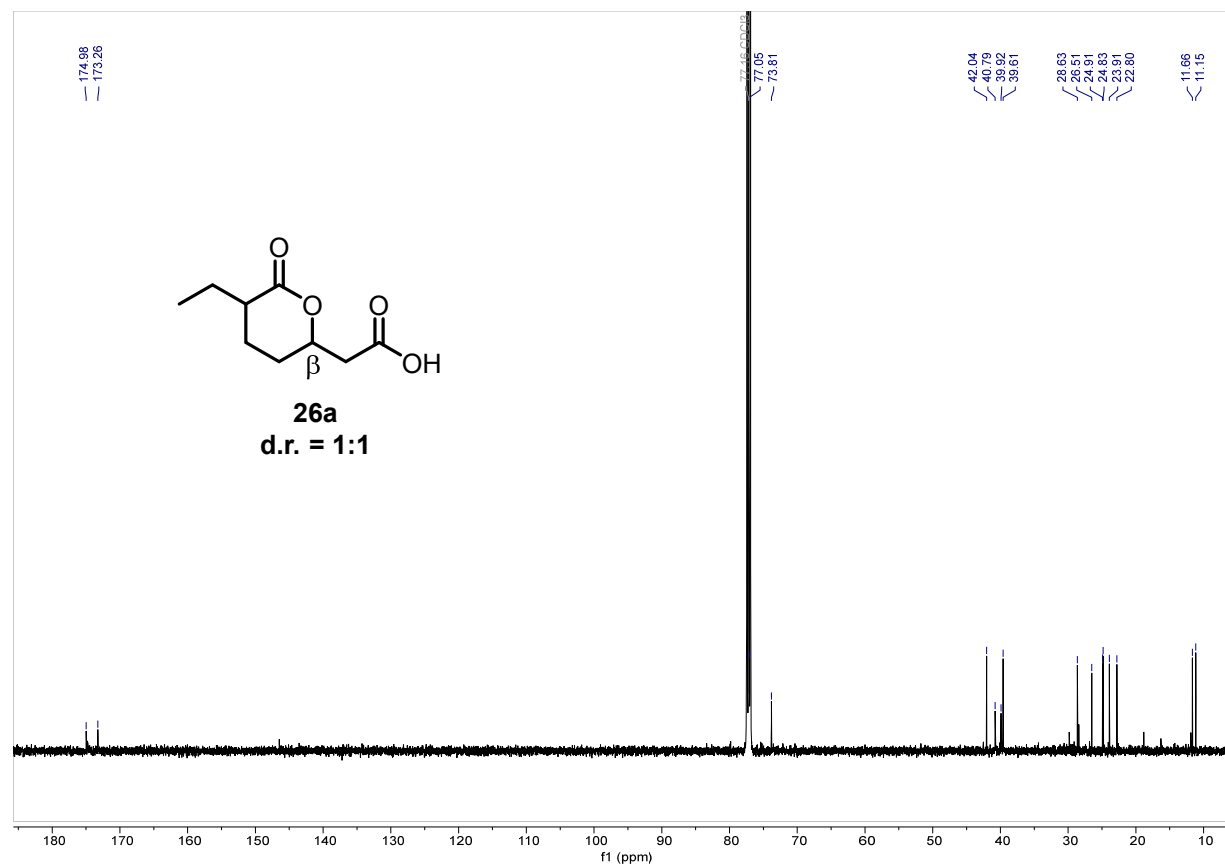

**2-(5-Isopropyl-6-oxotetrahydro-2H-pyran-2-yl)acetic acid 27a**

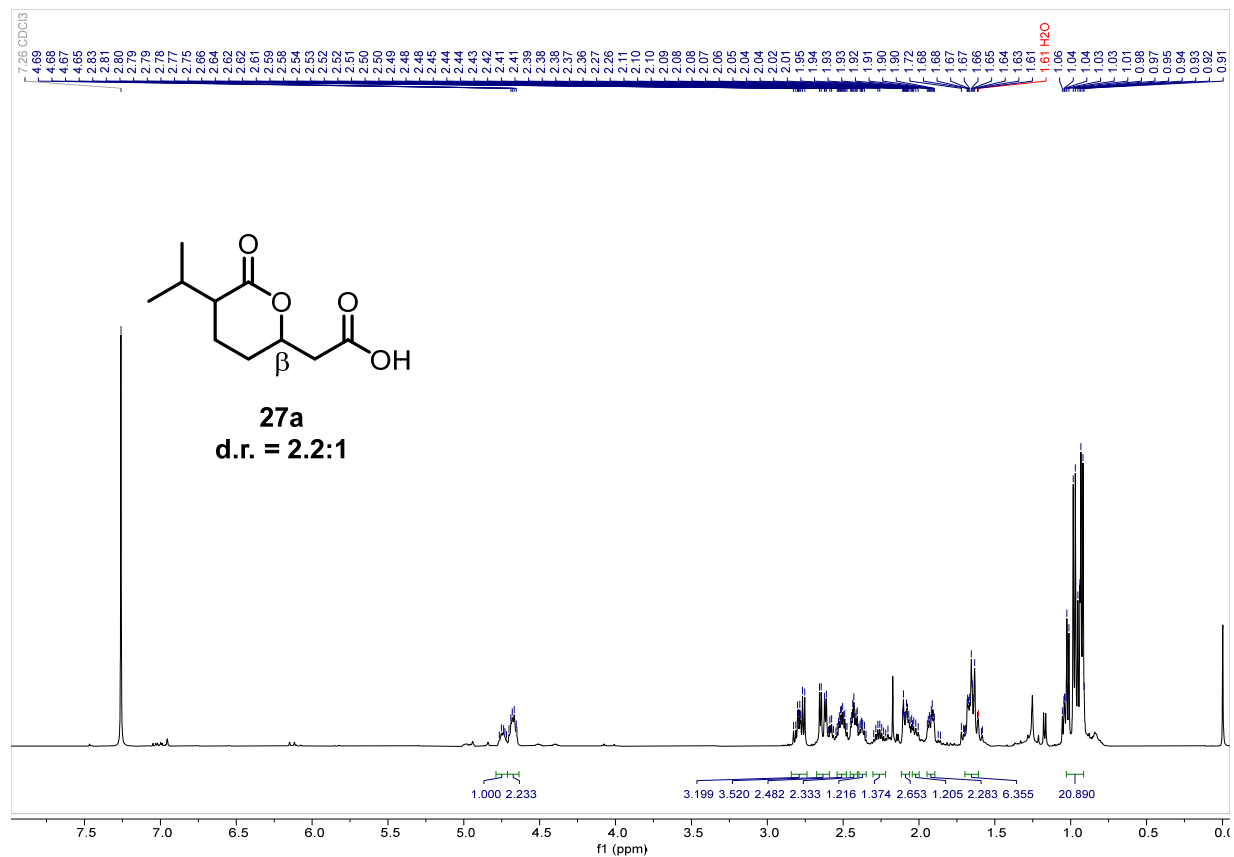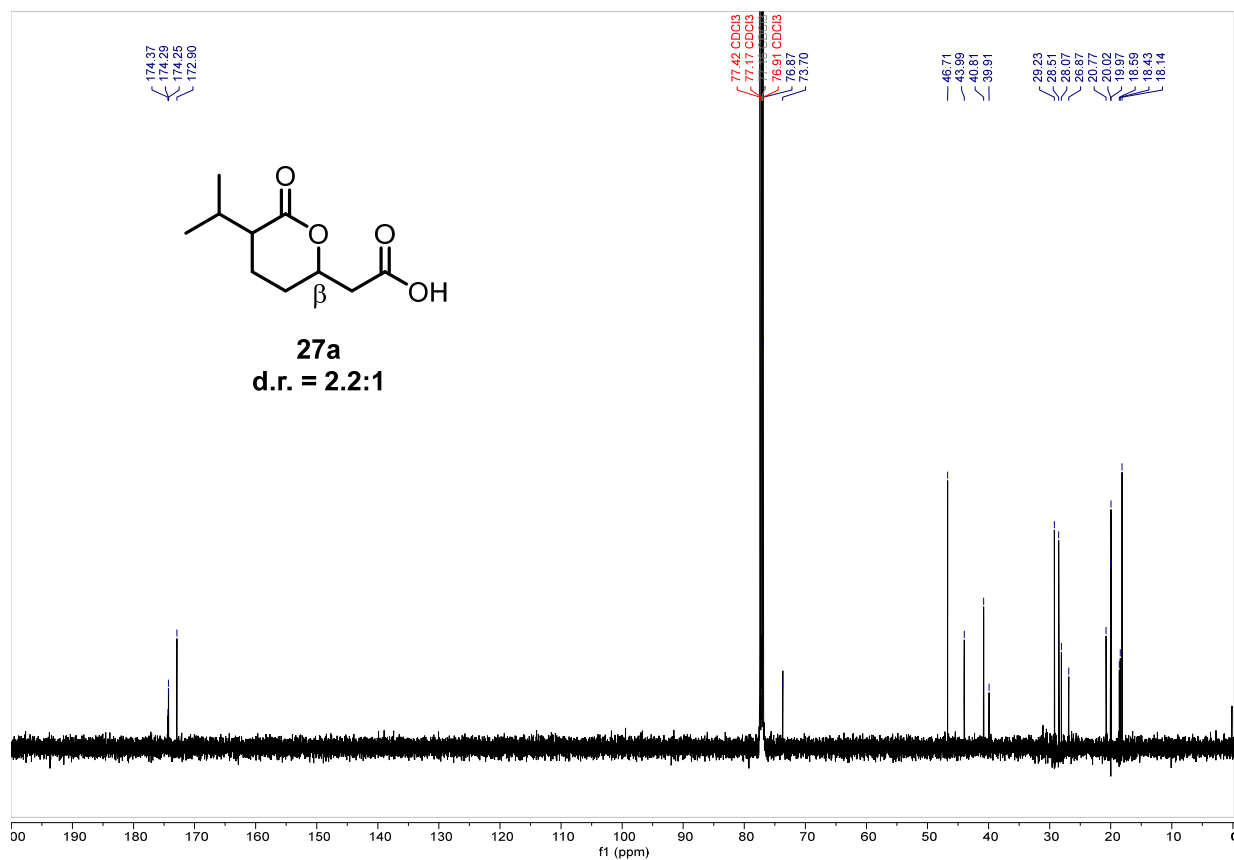

2-(5,5-Dimethyl-6-oxotetrahydro-2H-pyran-2-yl)acetic acid 28a

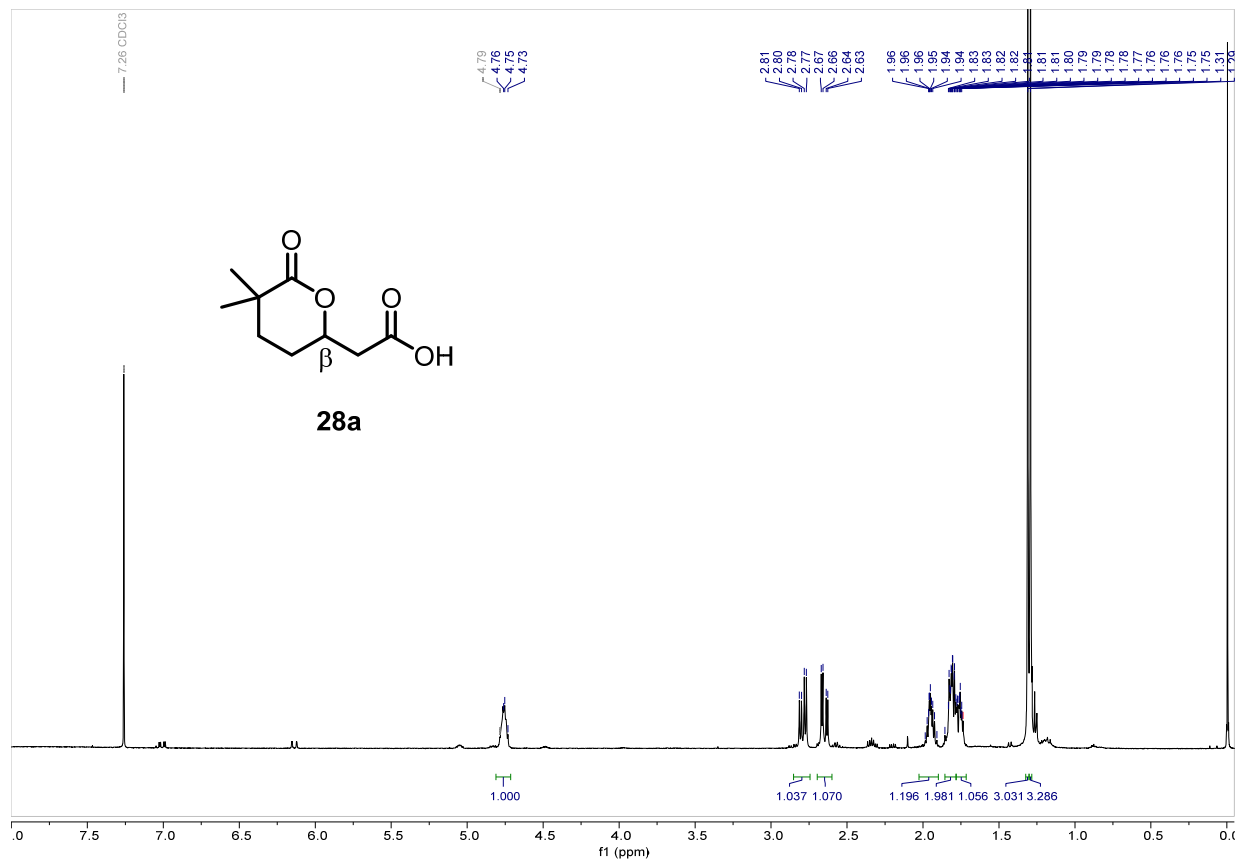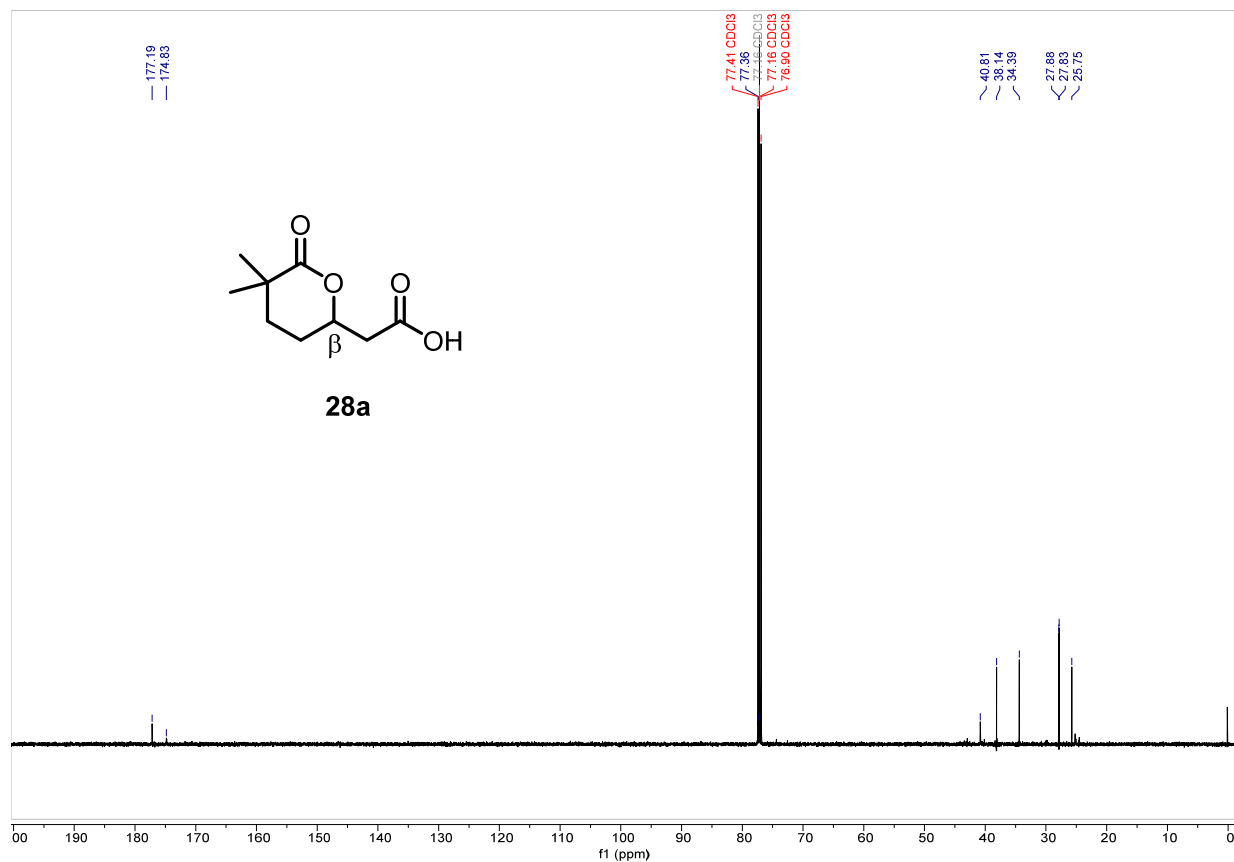

# Benzyl 2-(4-methyl-6-oxotetrahydro-2H-pyran-2-yl)acetate 29a

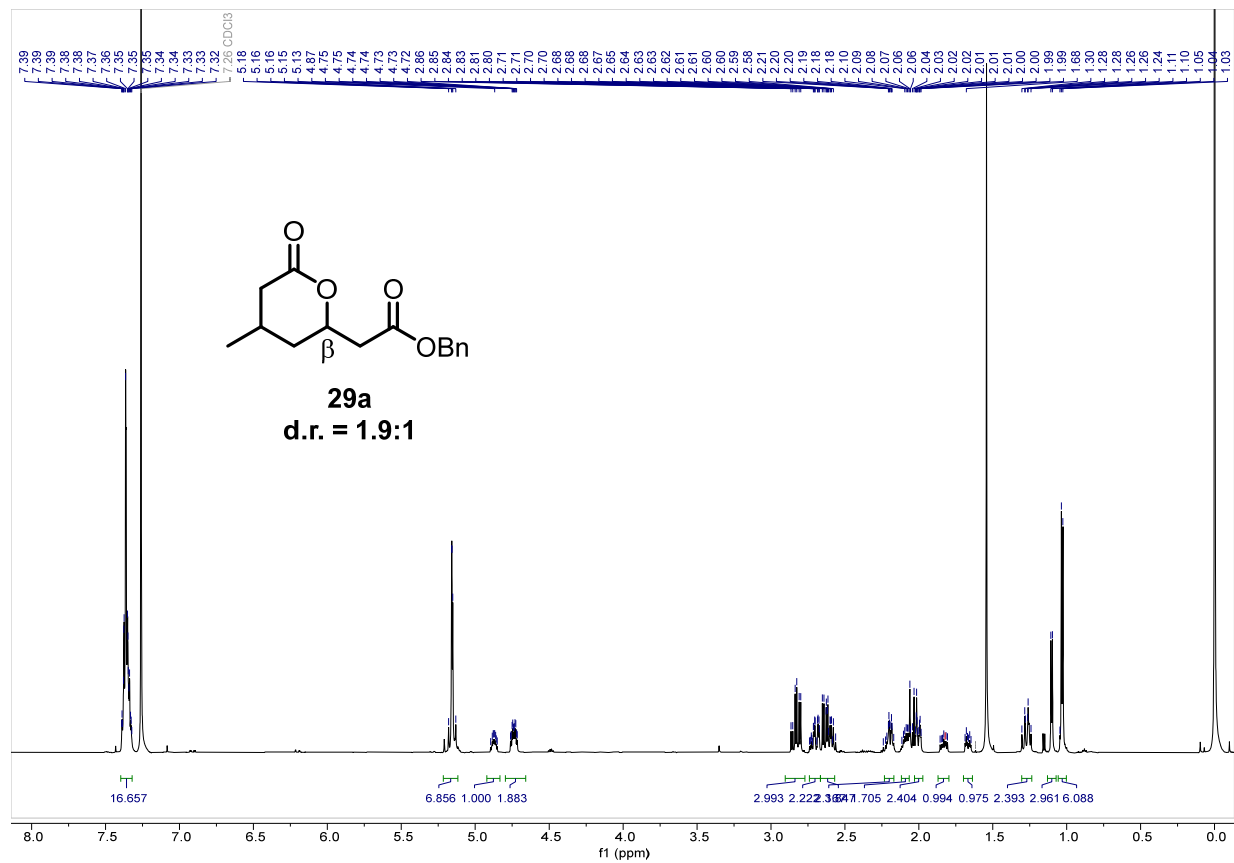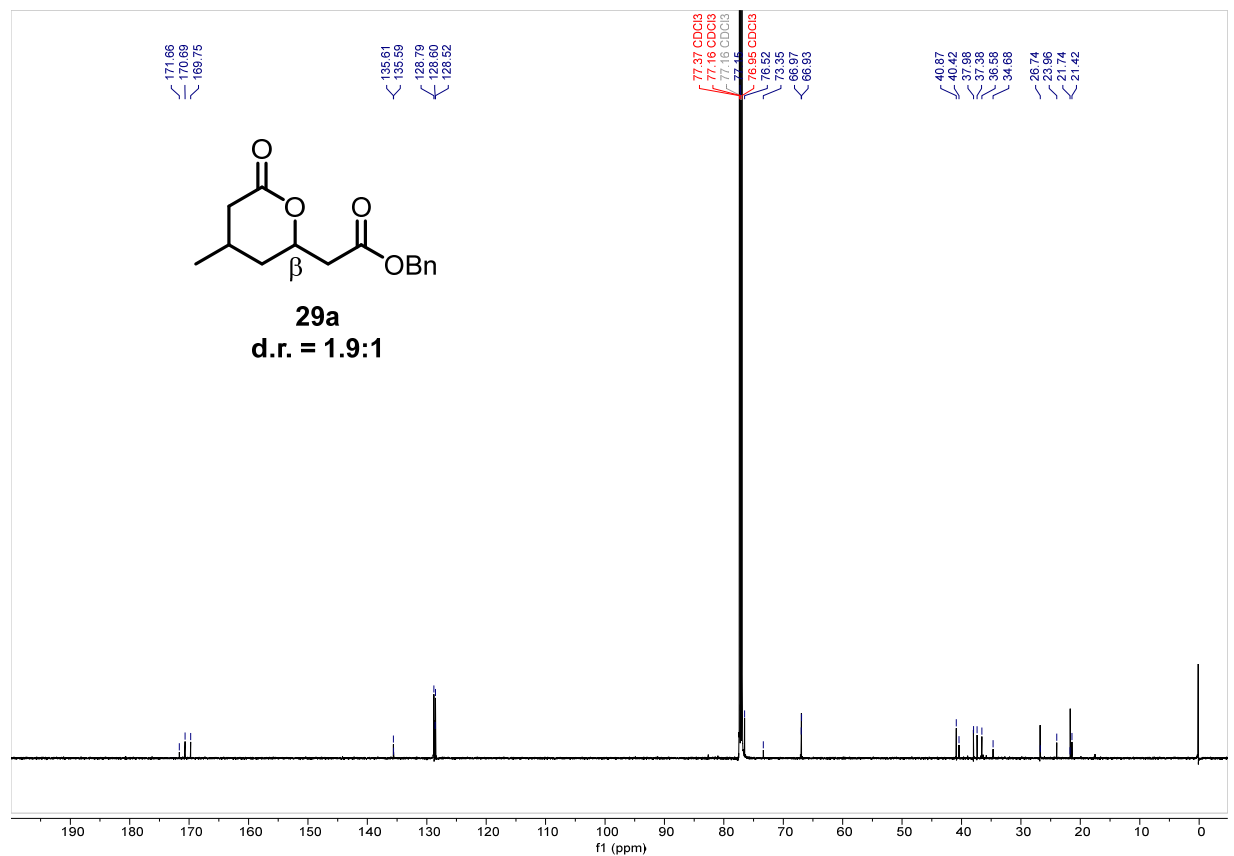

# Benzyl 2-(4-isopropyl-6-oxotetrahydro-2H-pyran-2-yl)acetate 30a

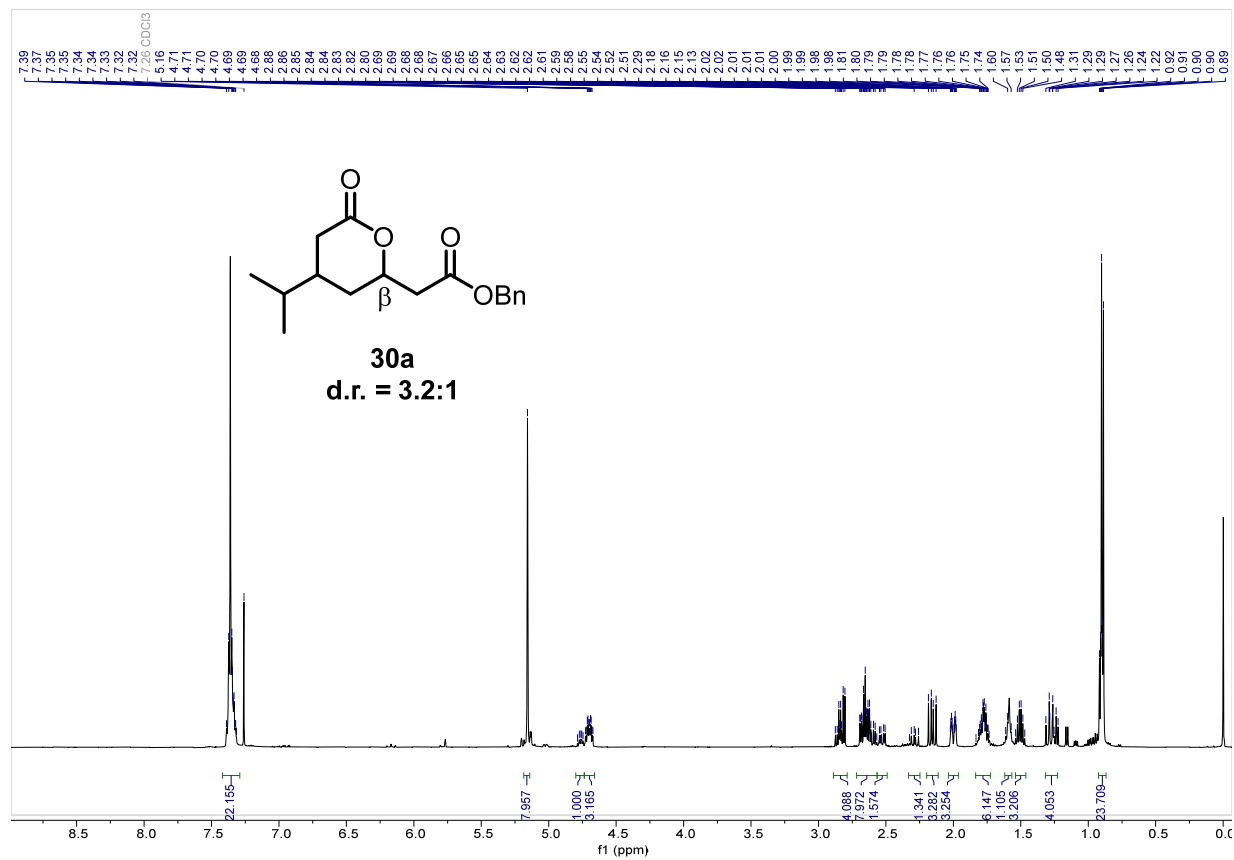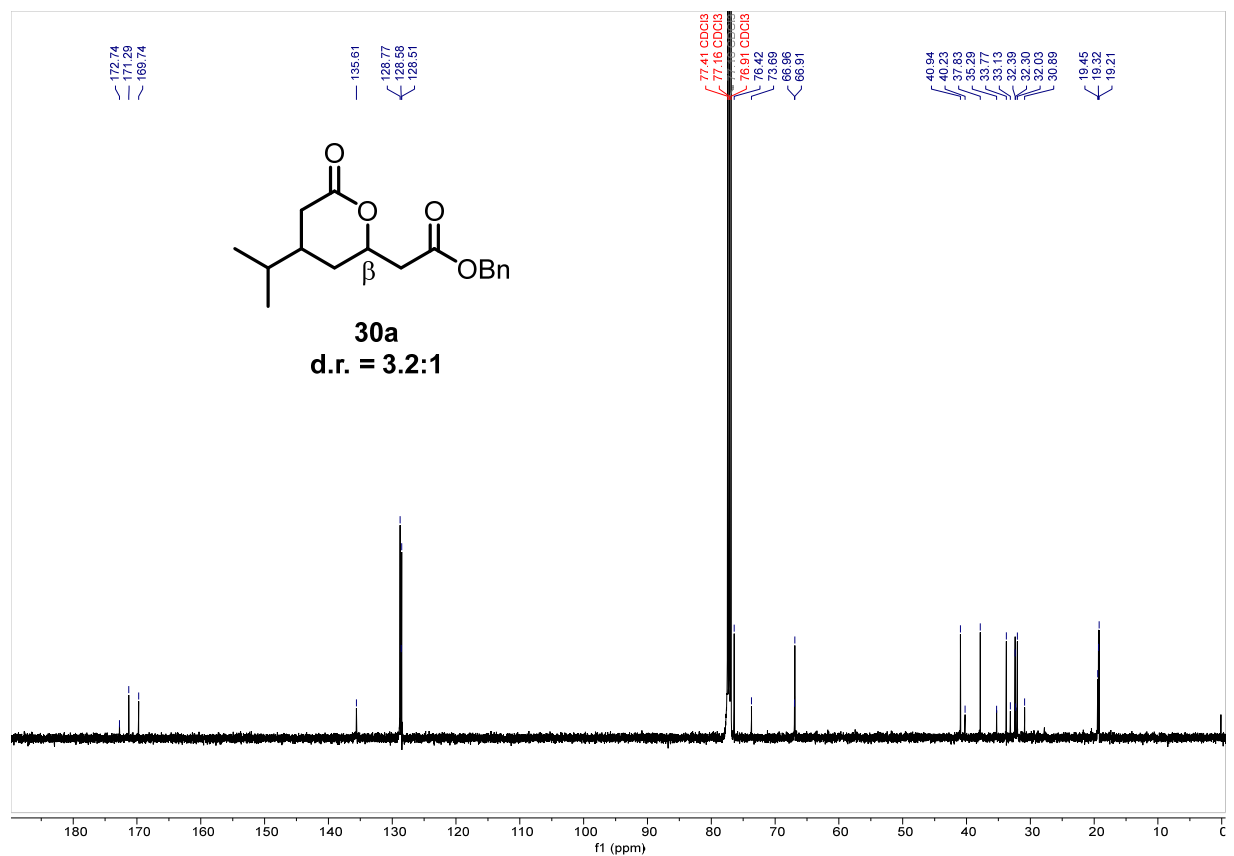

**Benzyl 2-(4-(*tert*-butyl)-6-oxotetrahydro-2*H*-pyran-2-yl)acetate 31a**

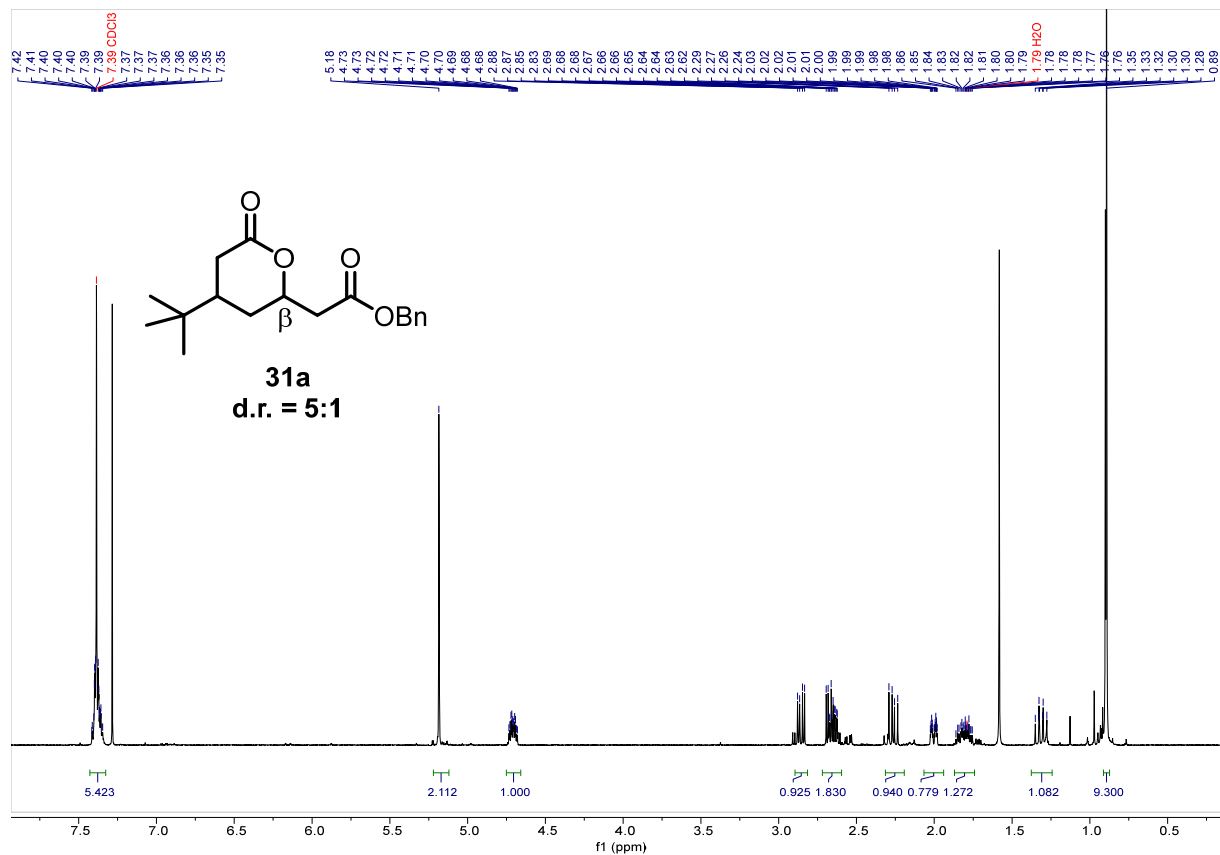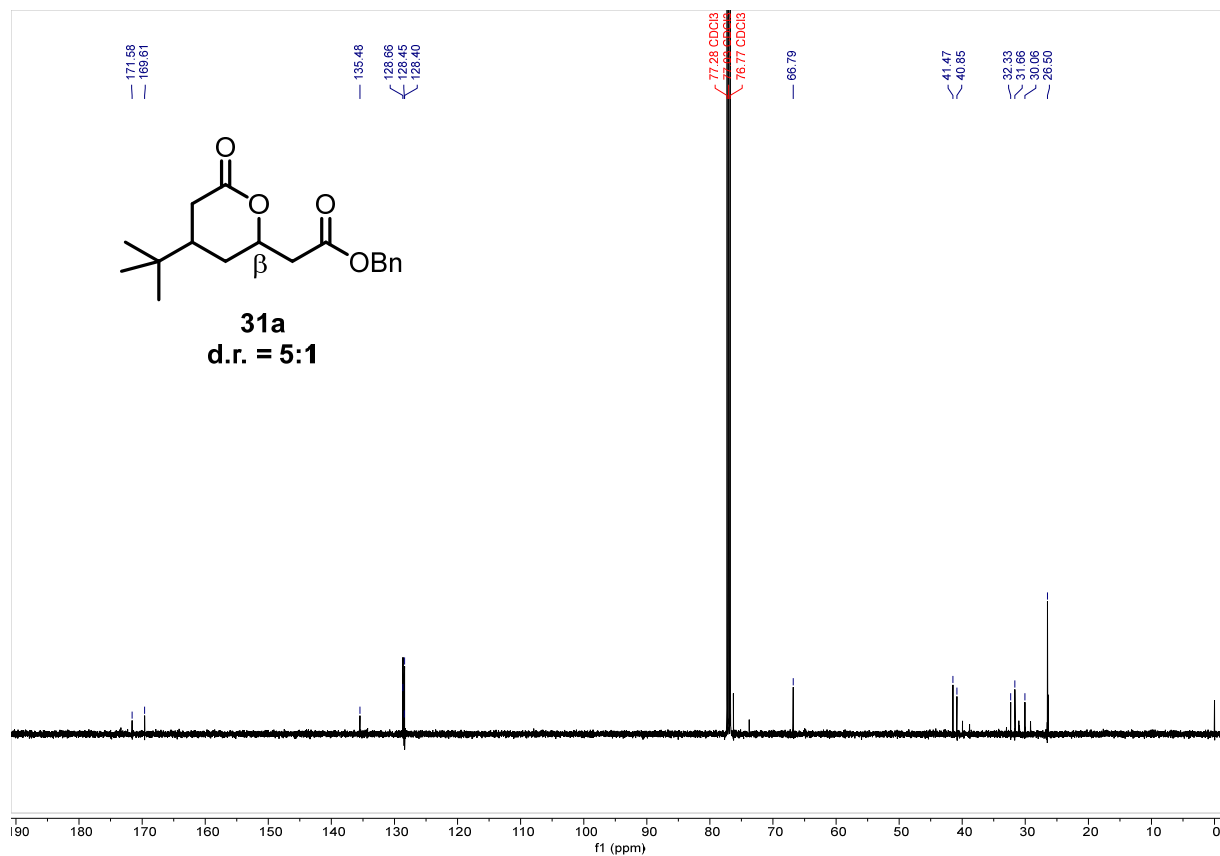



# Benzyl 2-(1-oxisochroman-3-yl)acetate 32a

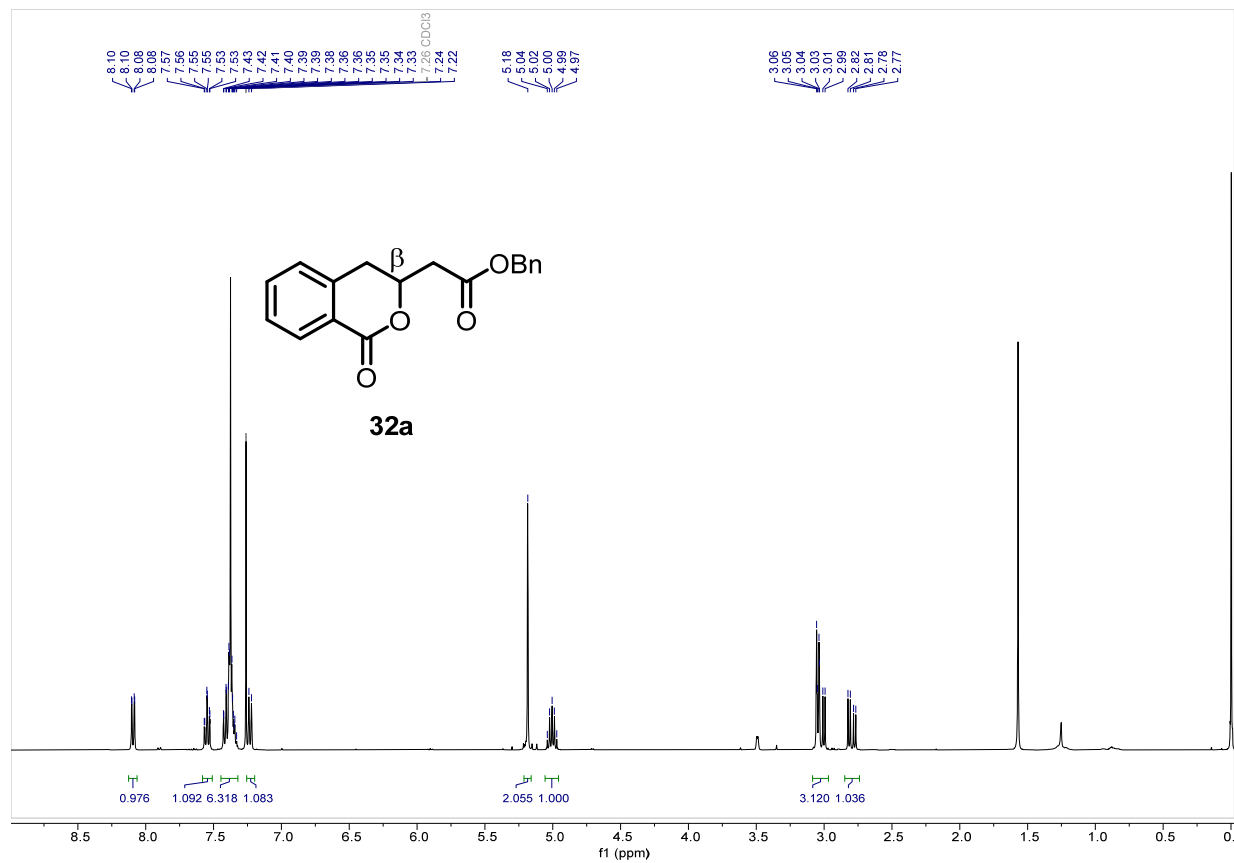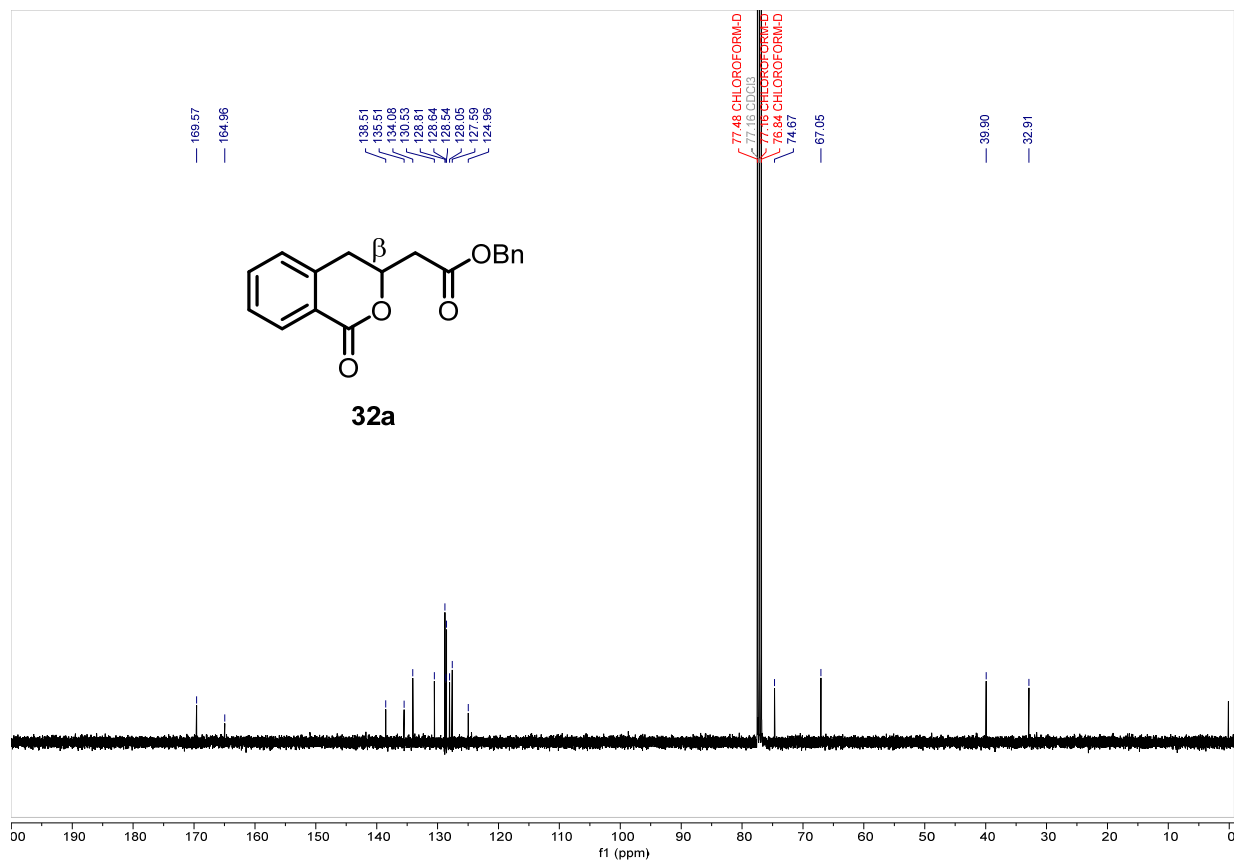

2-(5-Oxo-7,8-dihydro-5H-[1,3]dioxolo[4,5-g]isochromen-7-yl)acetic acid 33a

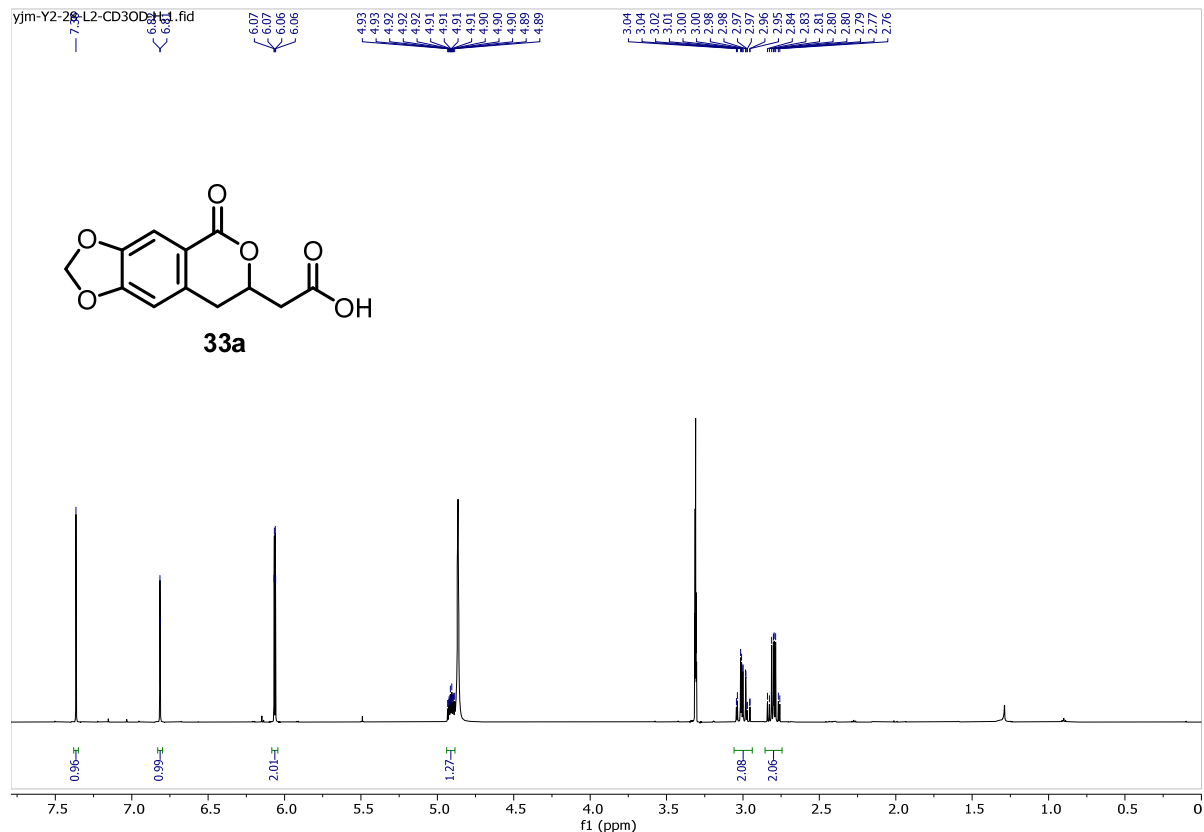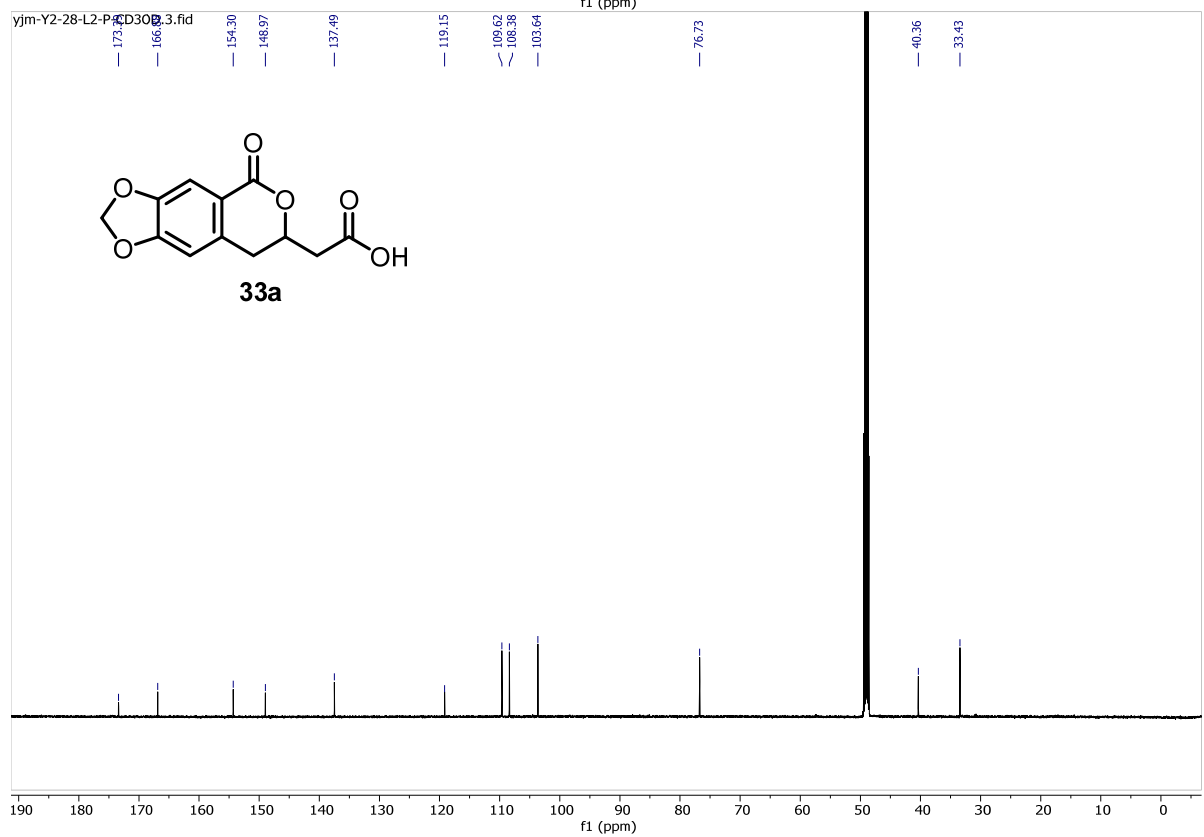

# 2-(6,7-Dimethoxy-1-oxisochroman-3-yl)acetic acid 34a

yjm-Y2-27-L2-CD3OD-H.1.fid

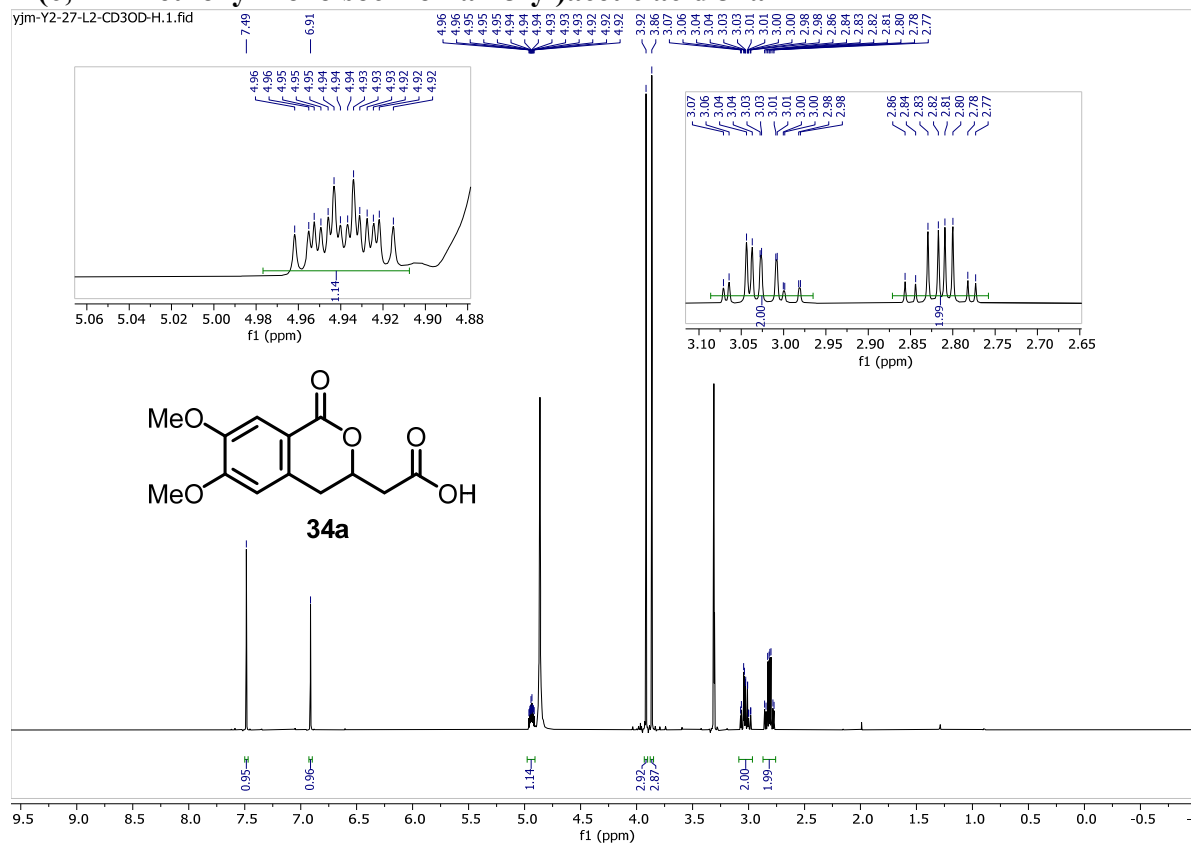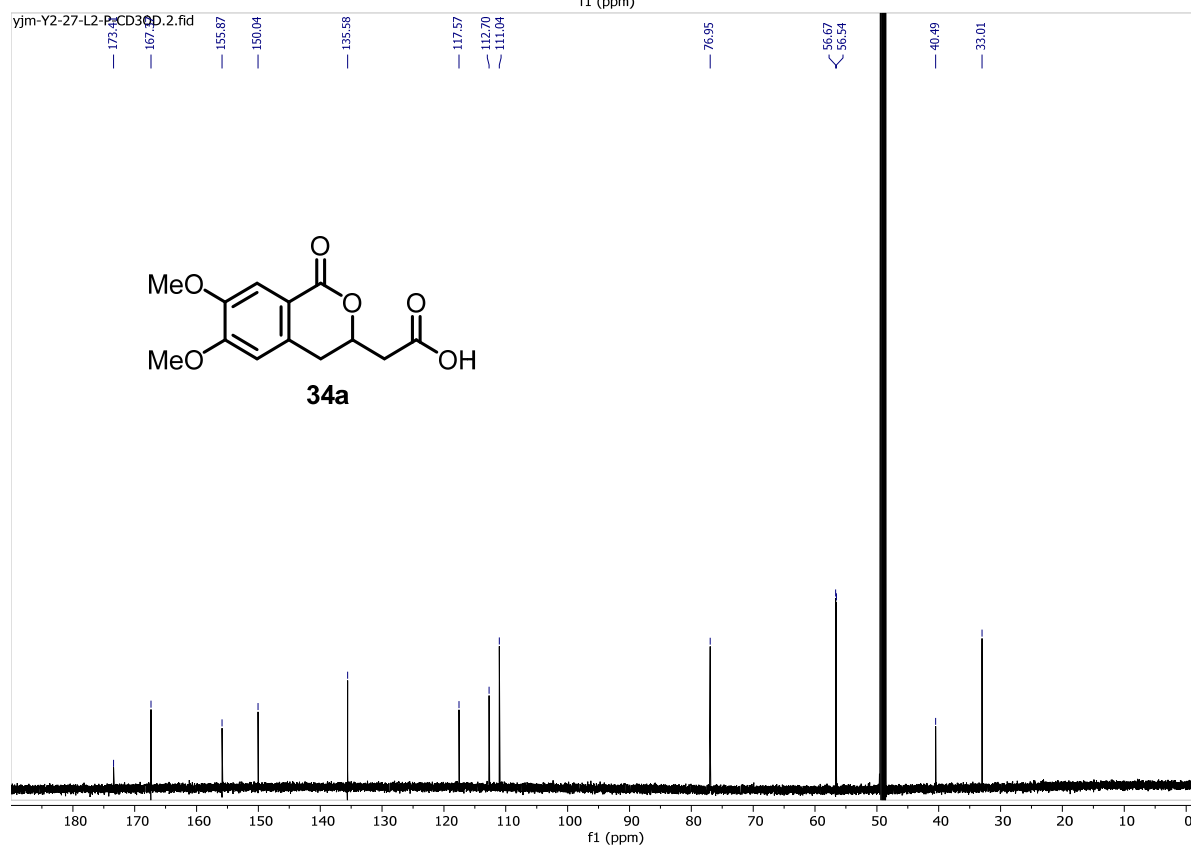

## 2-(7-Methoxy-1-oxisochroman-3-yl)acetic acid 35a

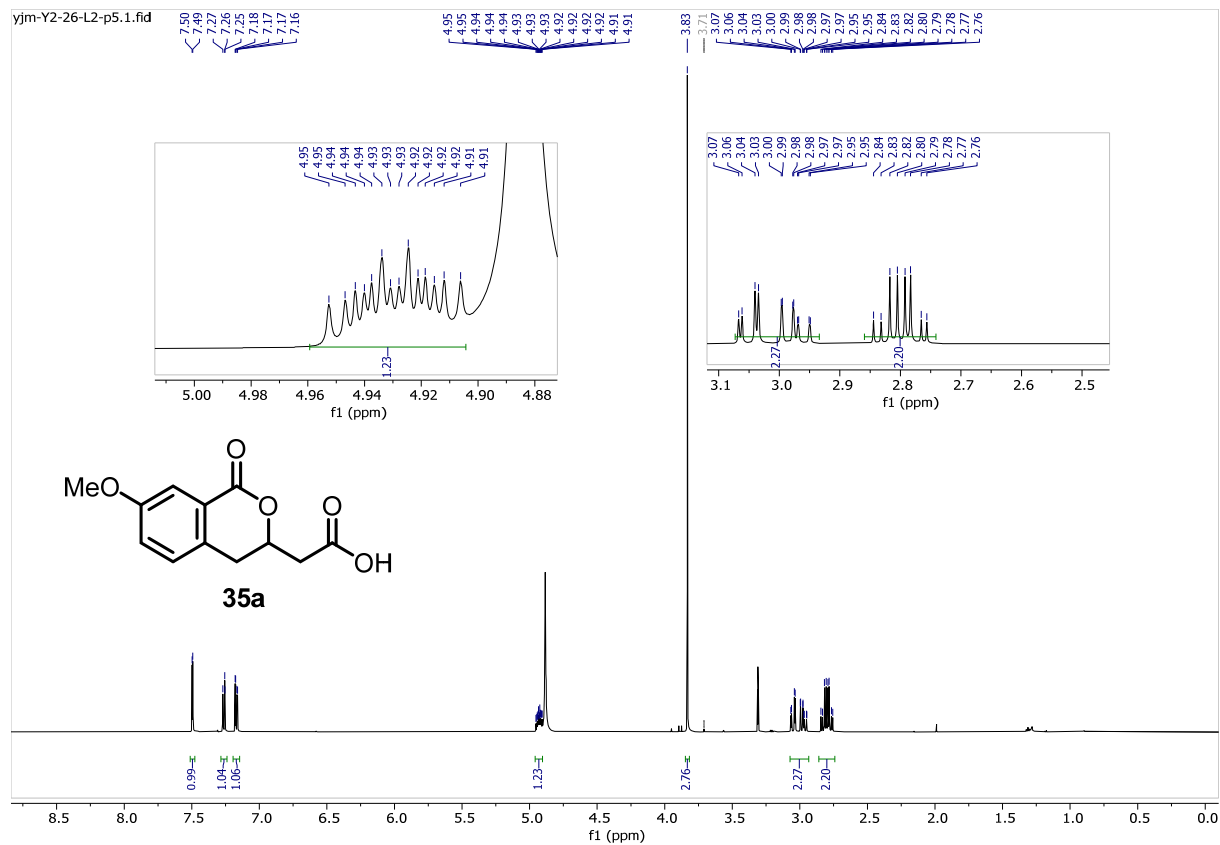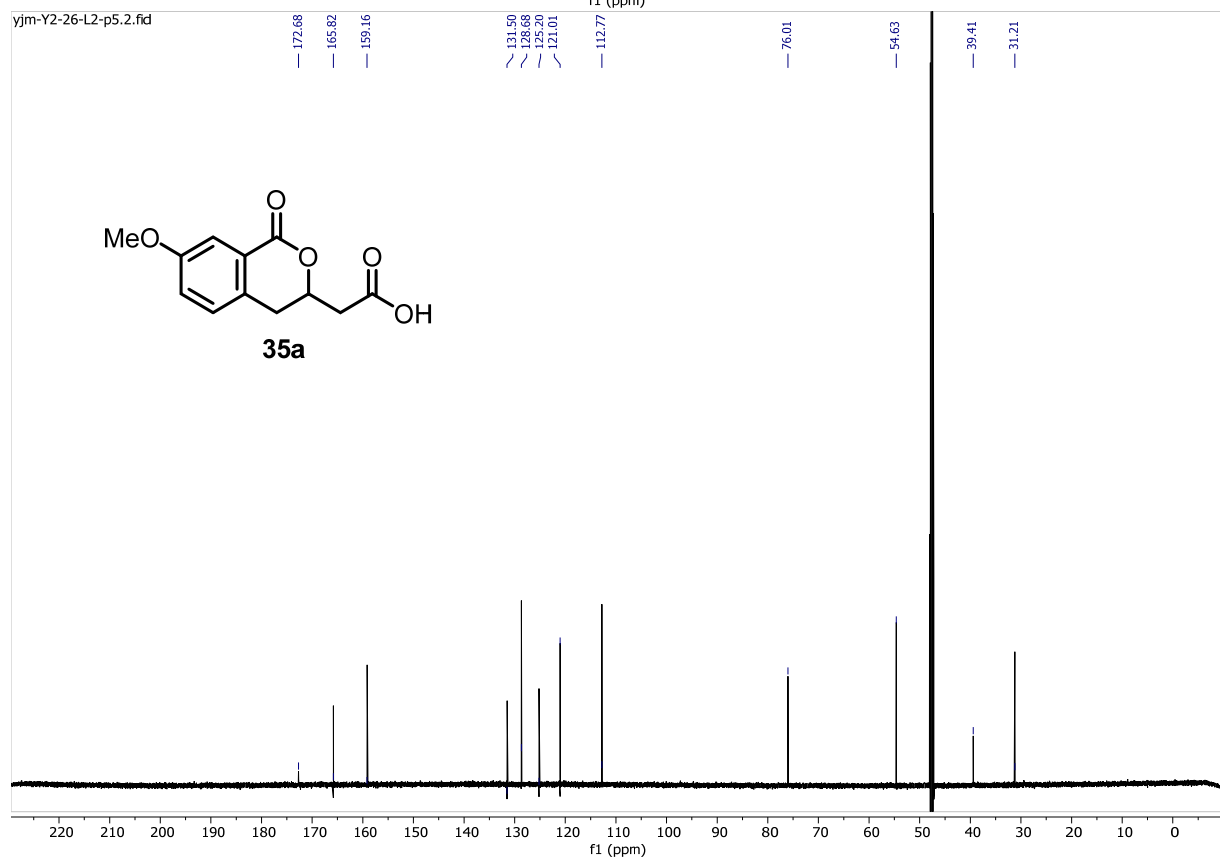

## 2-(7-(2,5-Dioxopyrrolidin-1-yl)-1-oxisochroman-3-yl)acetic acid 36a

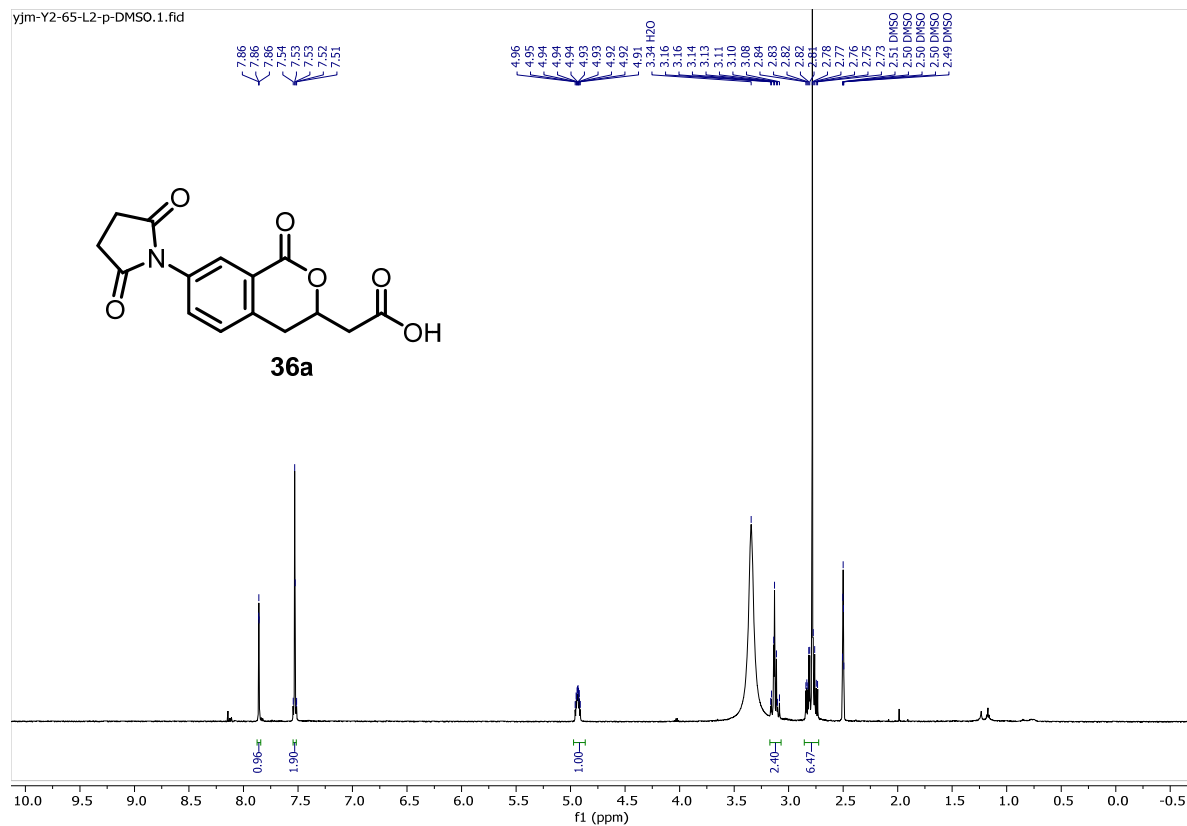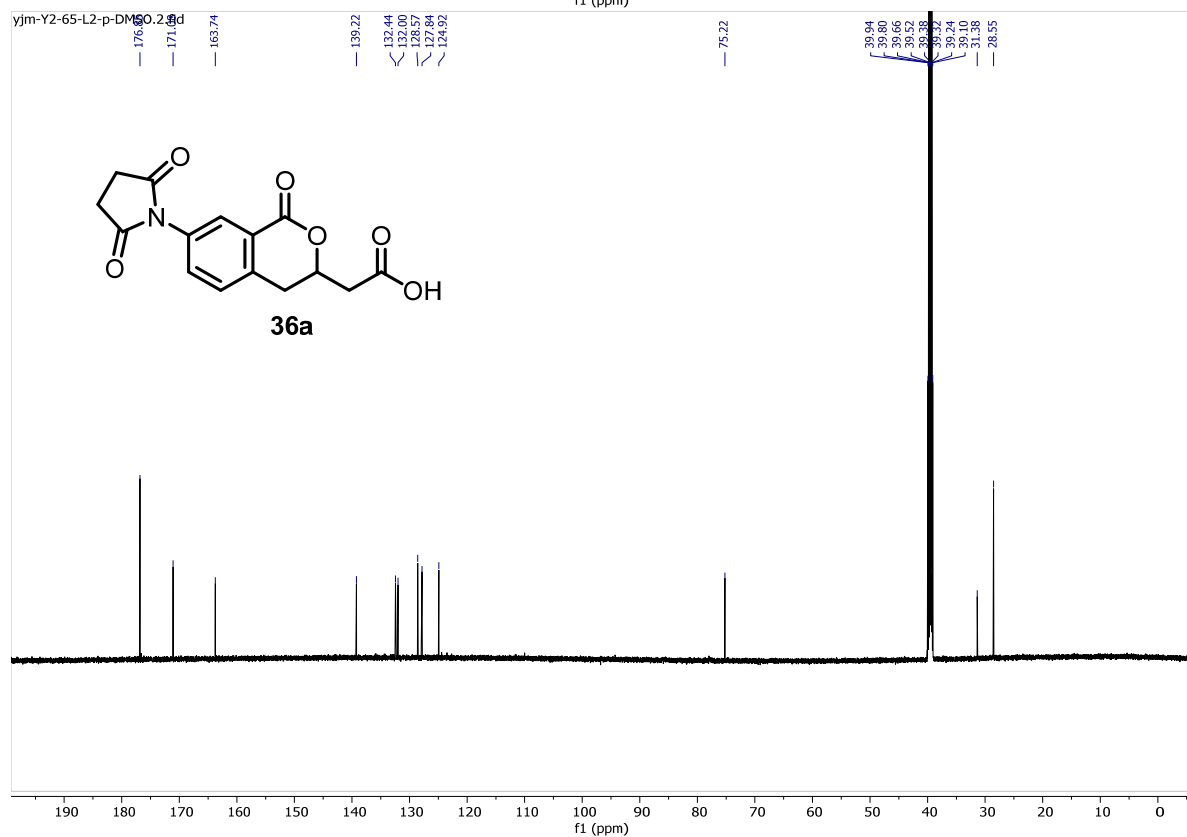

## 2-(8-Methyl-1-oxisochroman-3-yl)acetic acid 37a

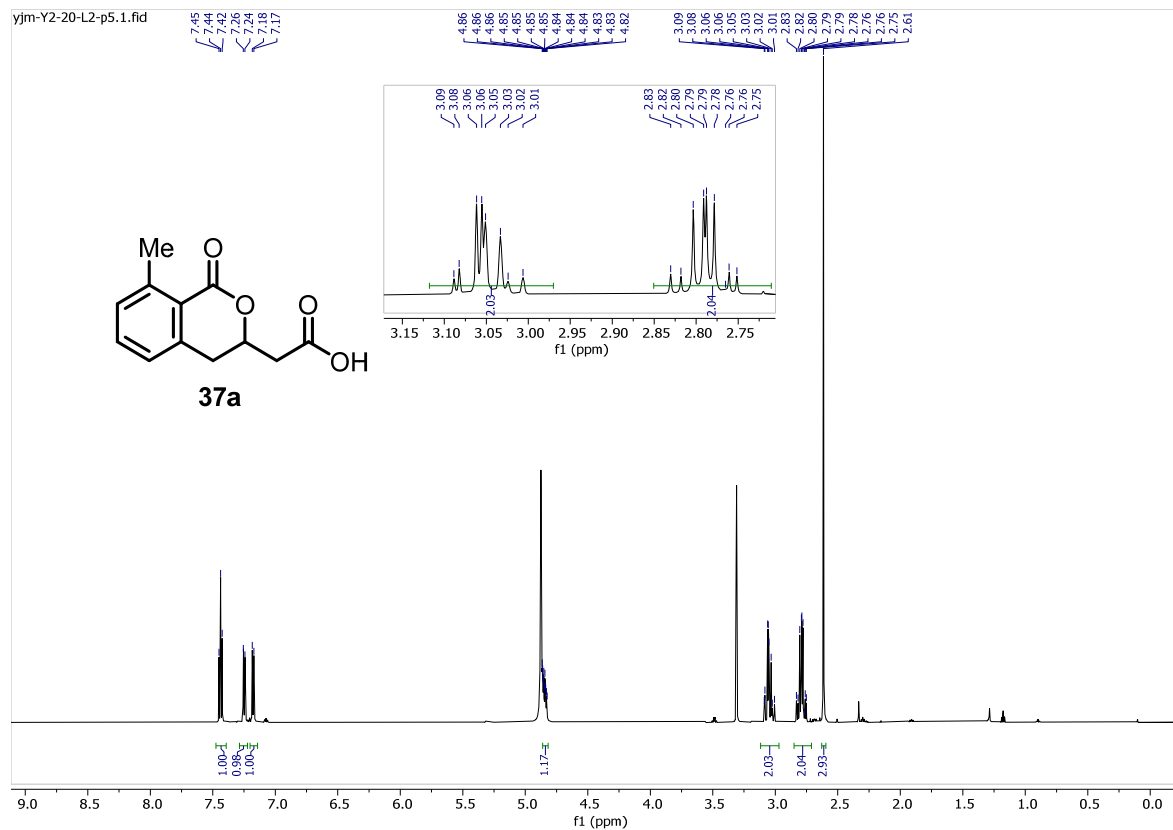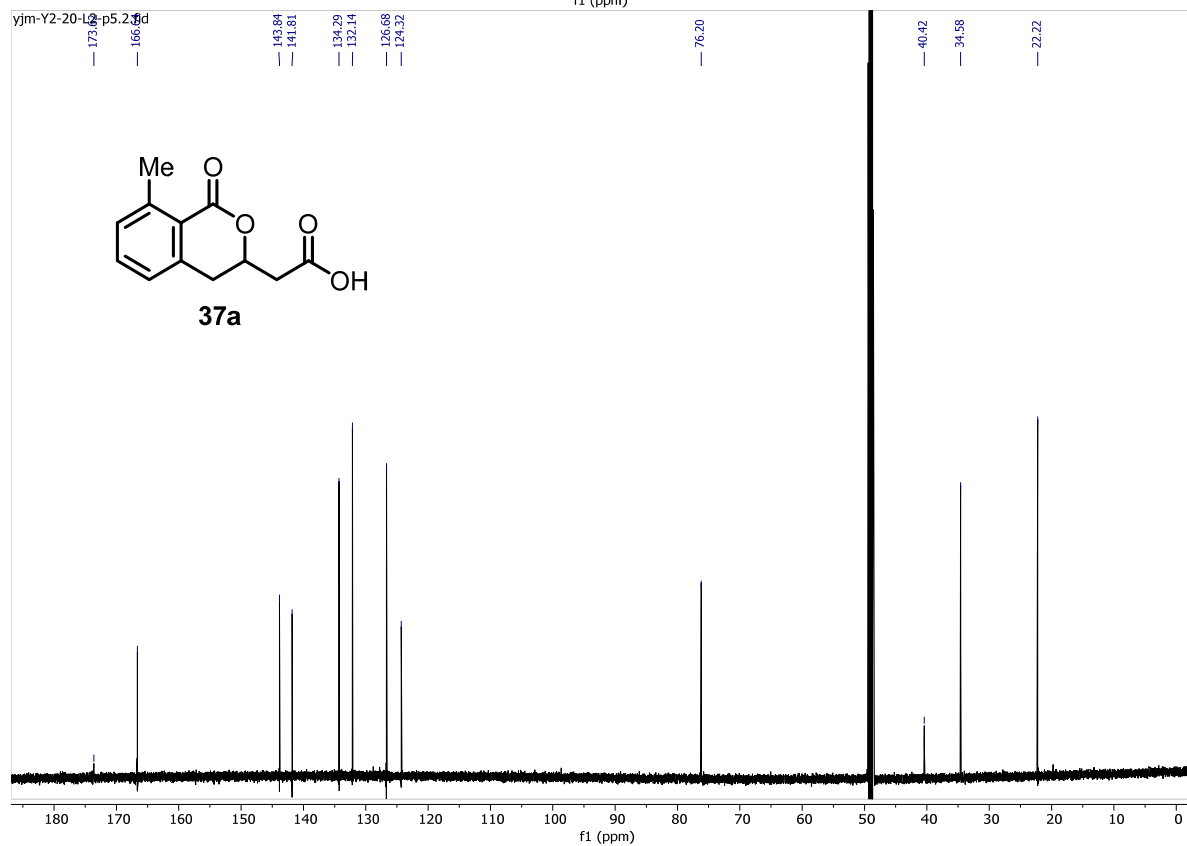

## 2-(6-Methyl-1-oxisochroman-3-yl)acetic acid 38a

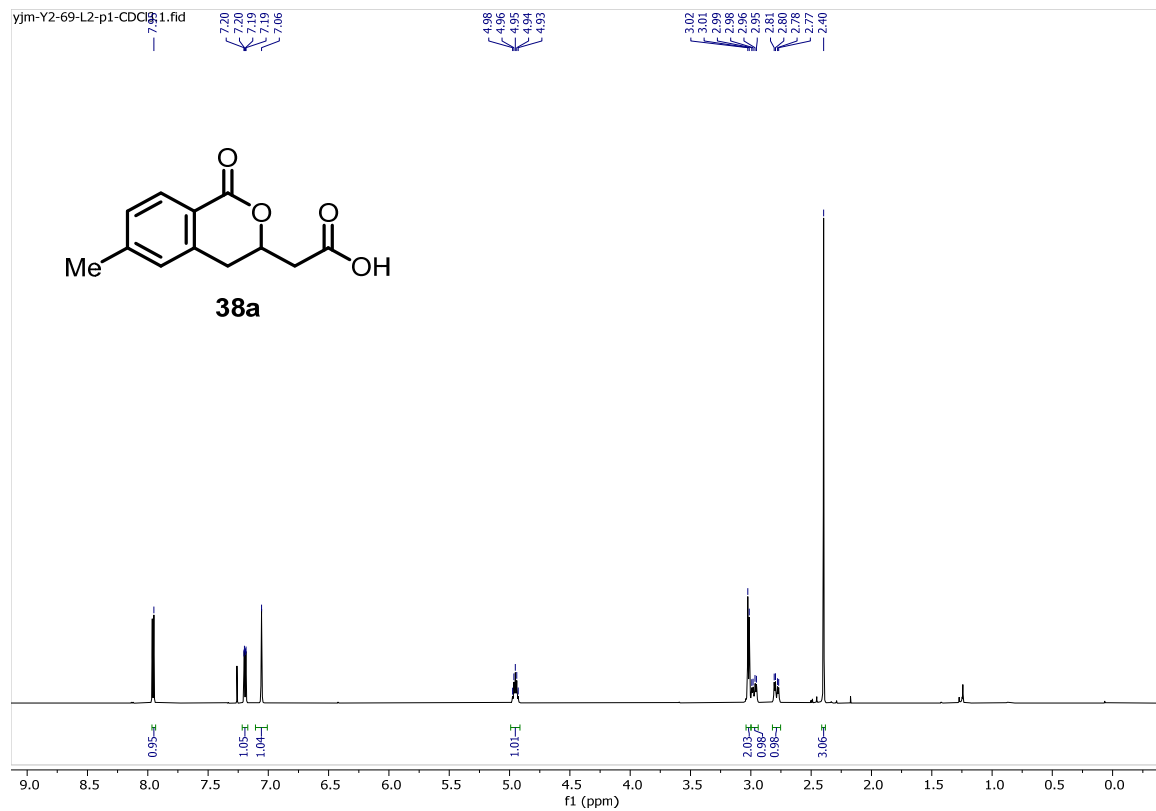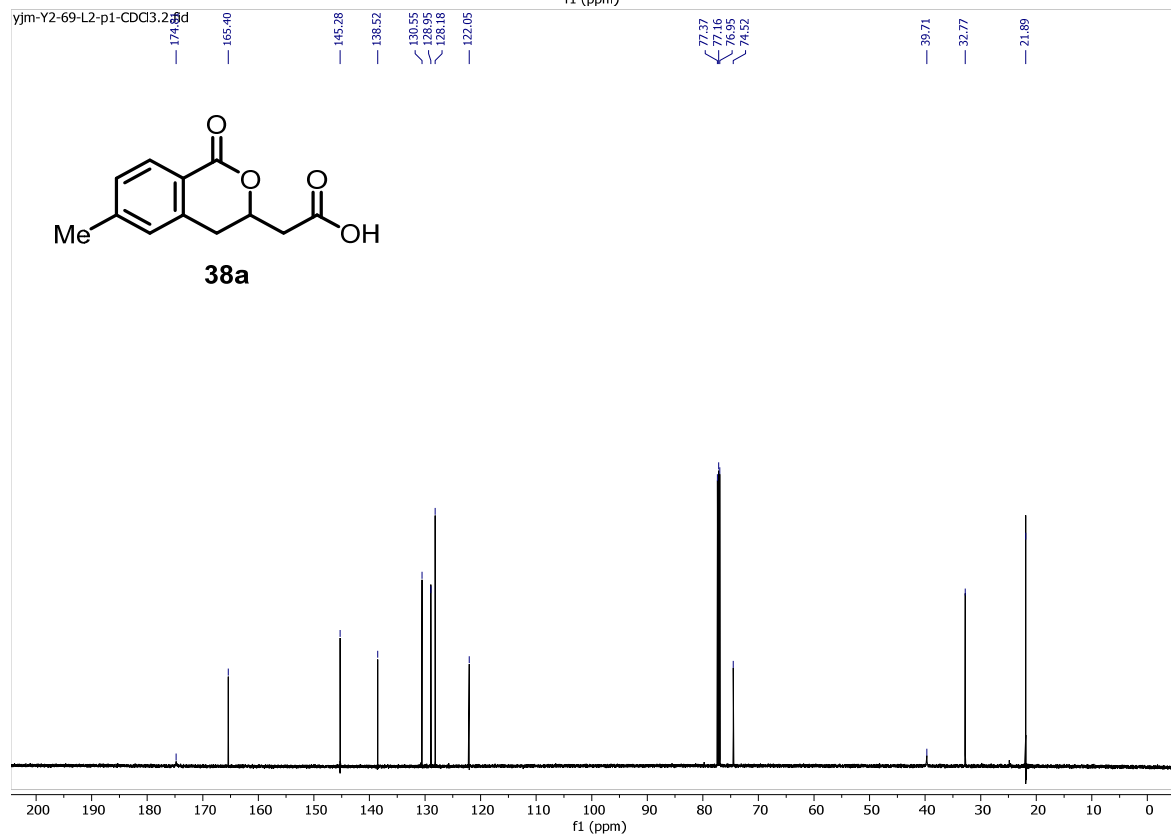

## 2-(5-Methyl-1-oxisochroman-3-yl)acetic acid 39a

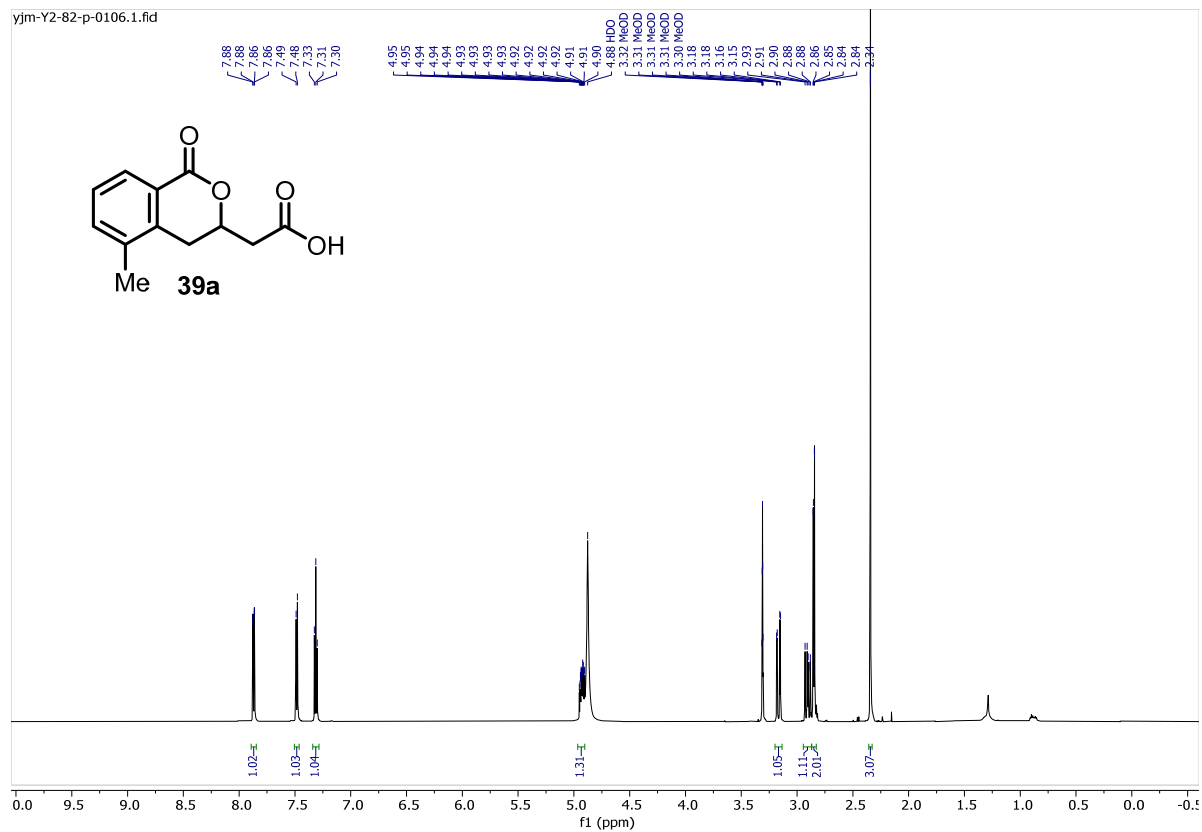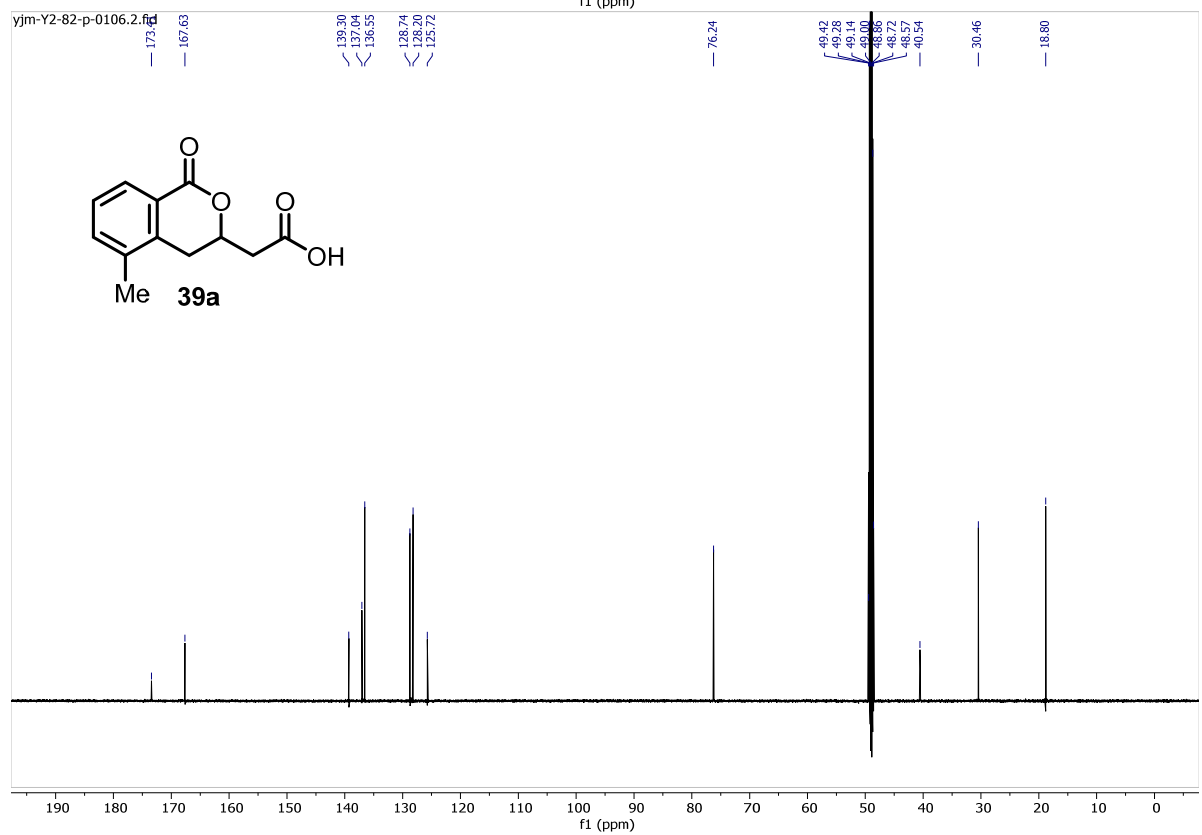



## 2-(6-Fluoro-1-oxisochroman-3-yl)acetic acid 40a

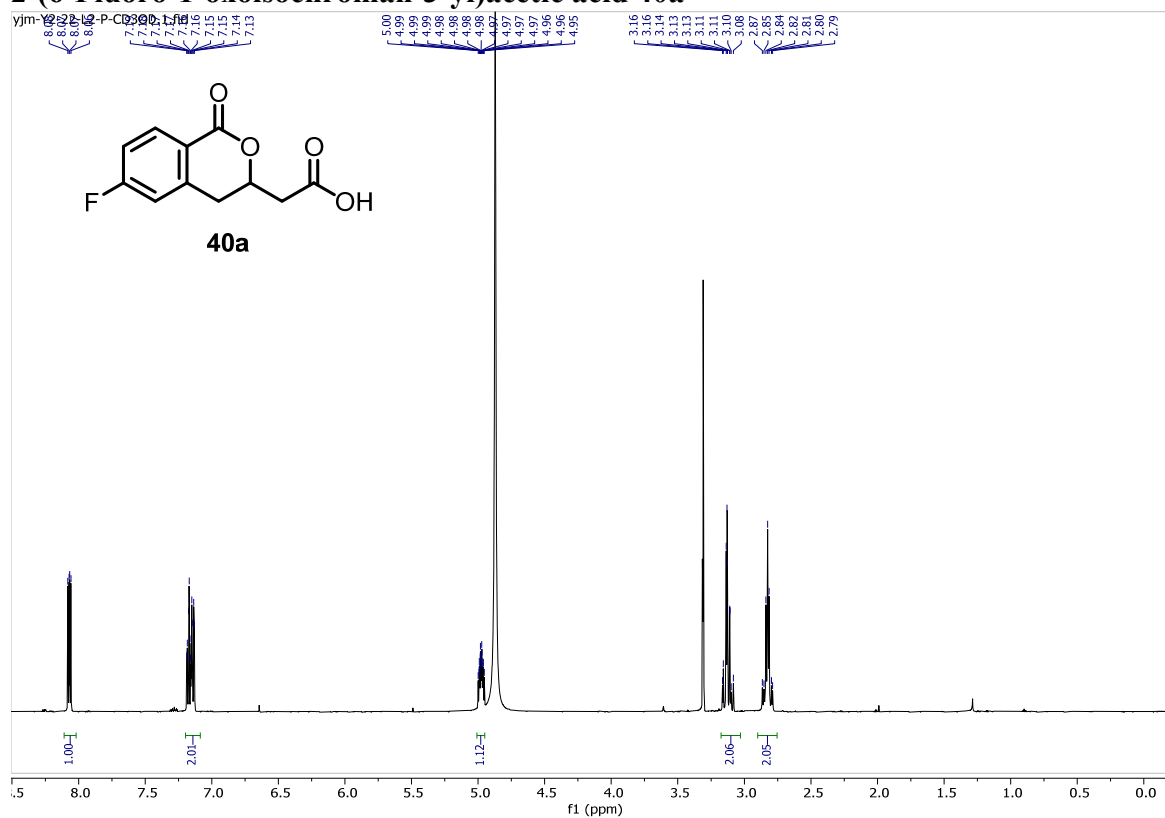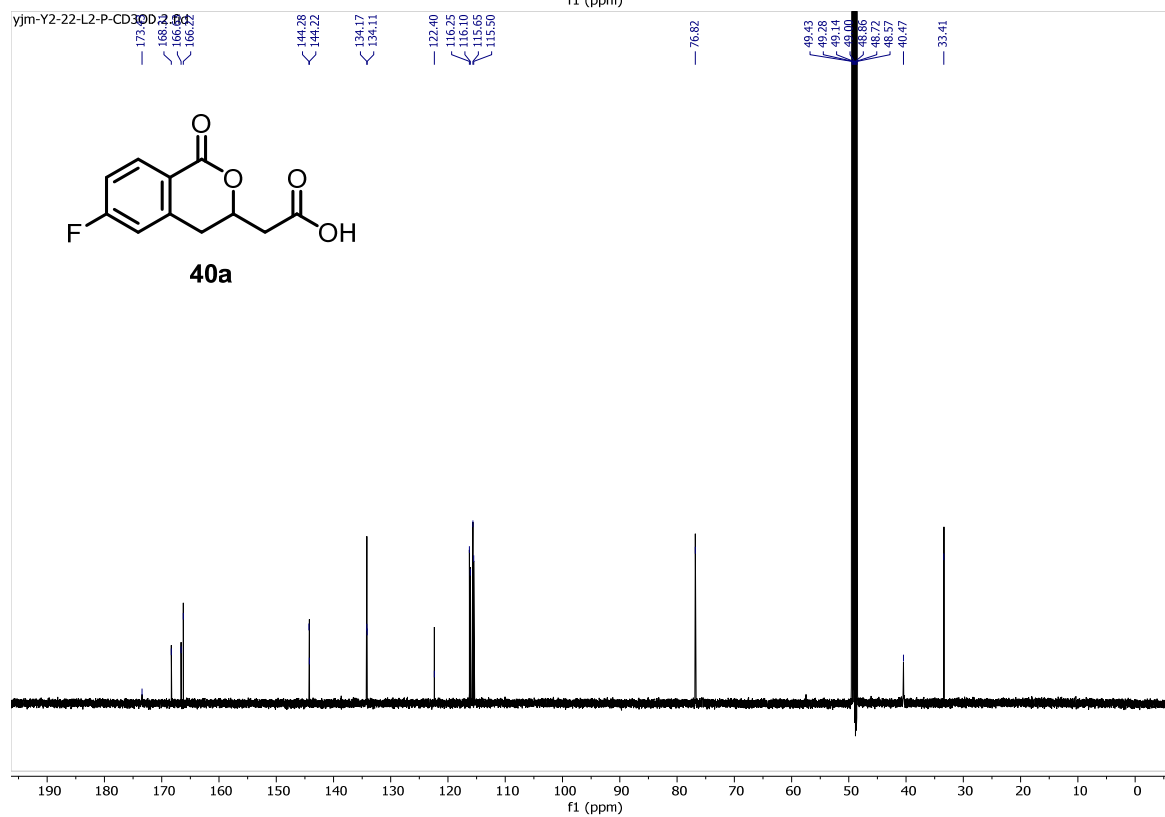

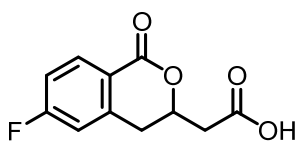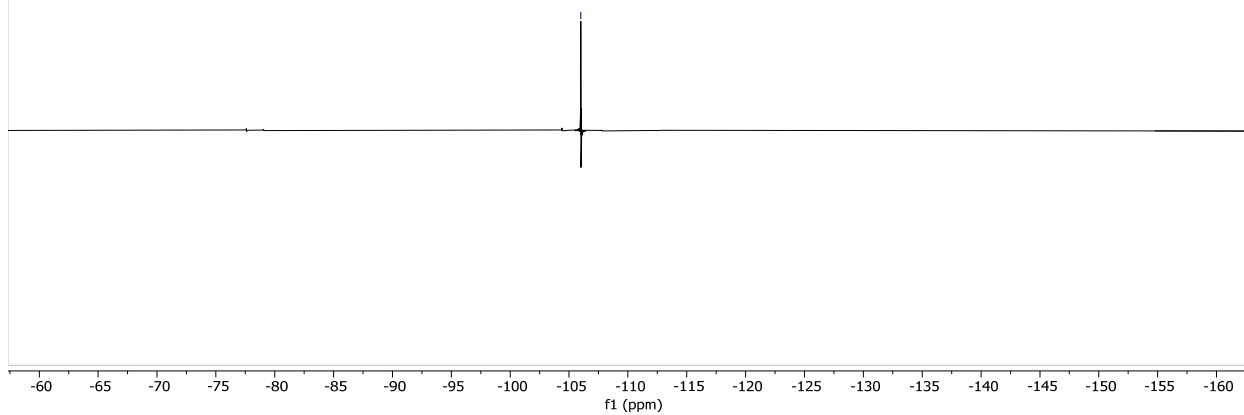

## 2-(6-Chloro-1-oxisochroman-3-yl)acetic acid 41a

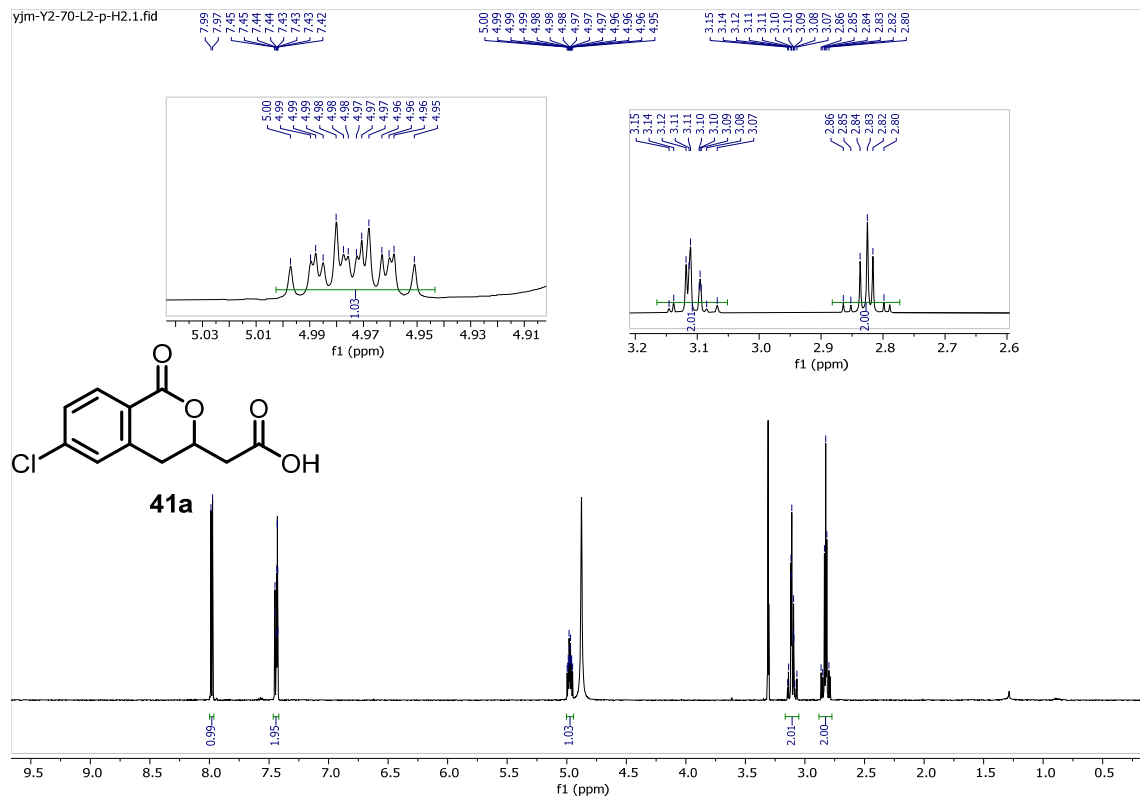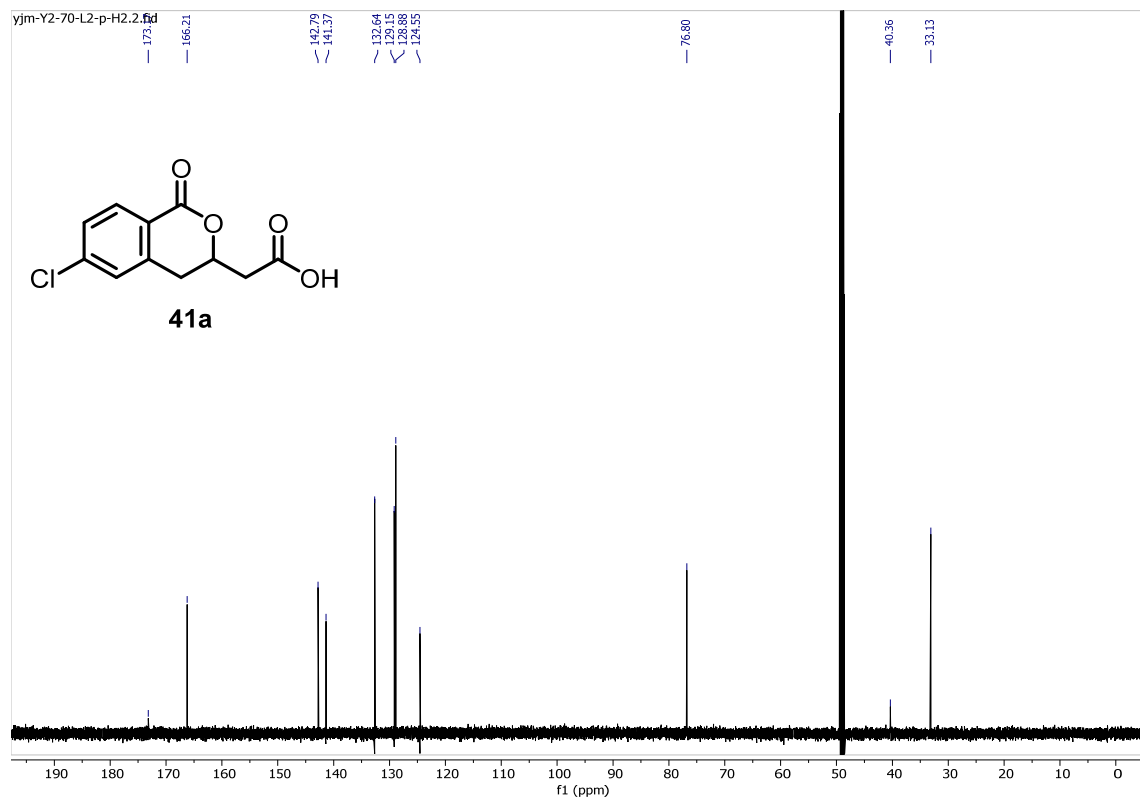

# 2-(1-Oxo-6-phenylisochroman-3-yl)acetic acid 42a

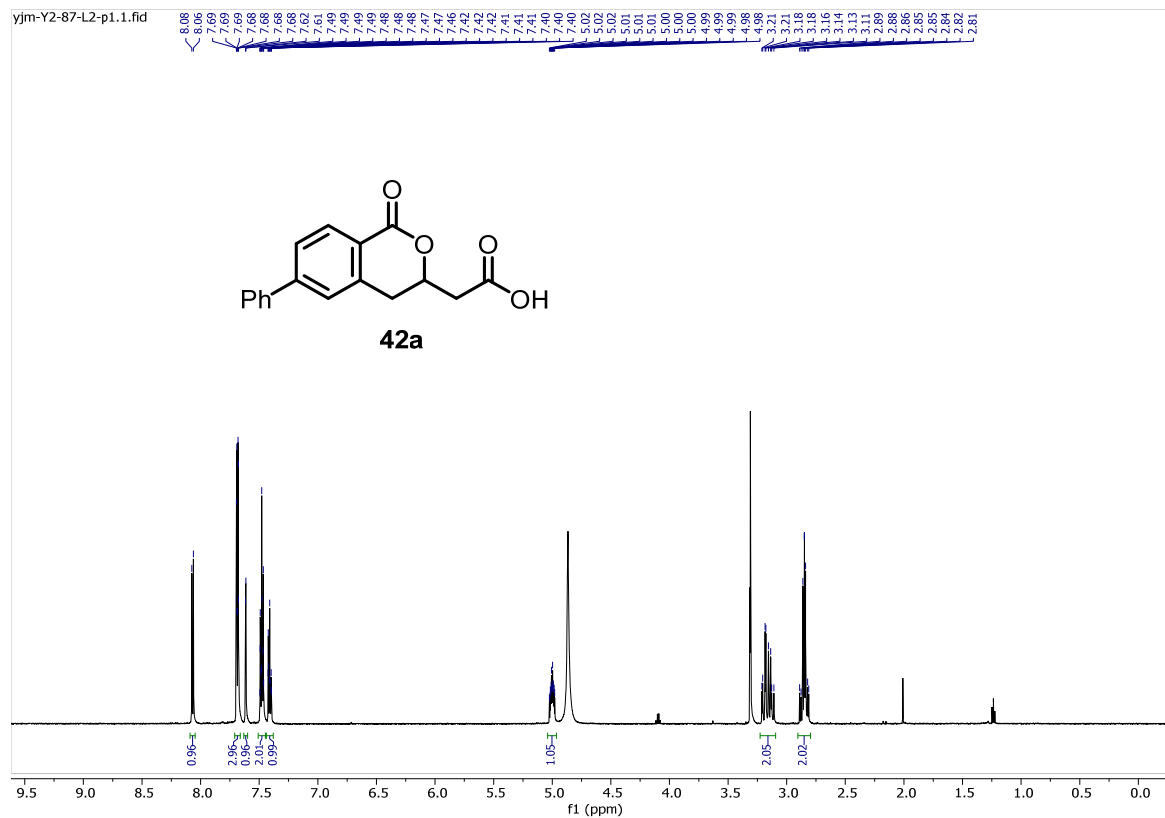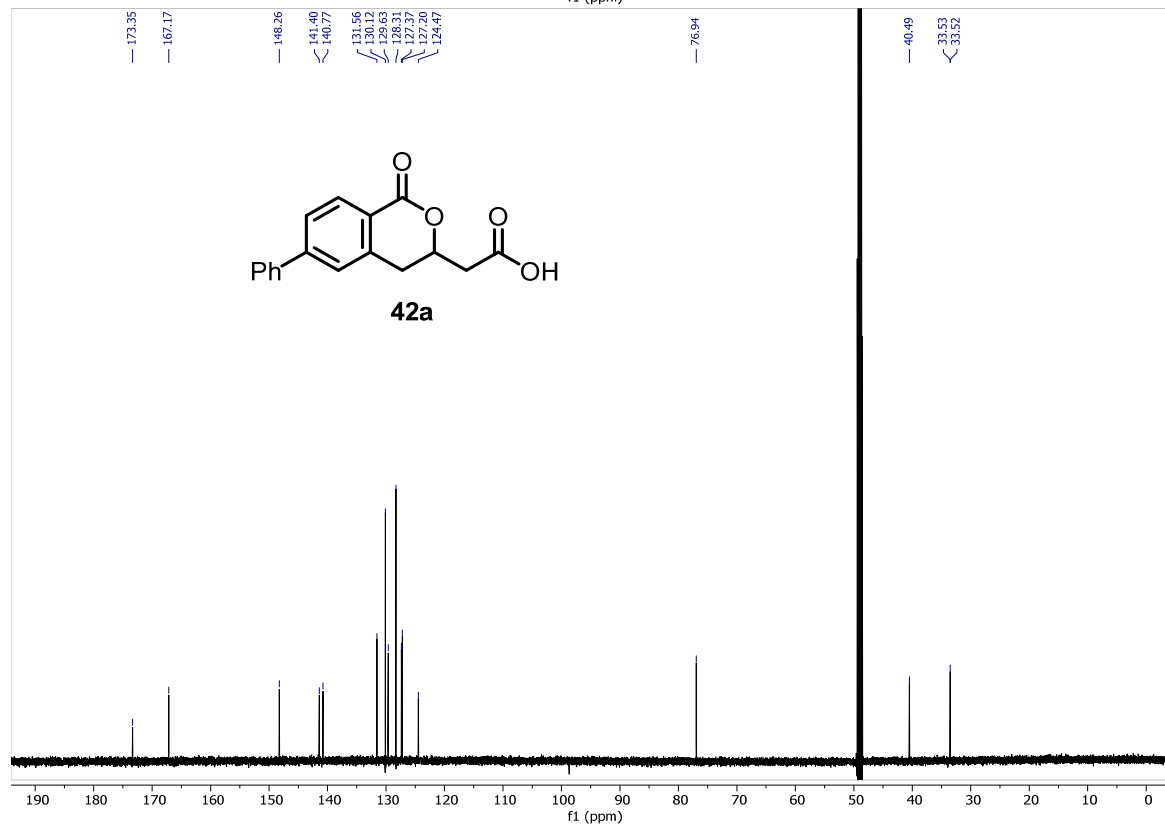

## 2-(1-Oxo-3,4-dihydro-1H-benzo[g]isochromen-3-yl)acetic acid 43a

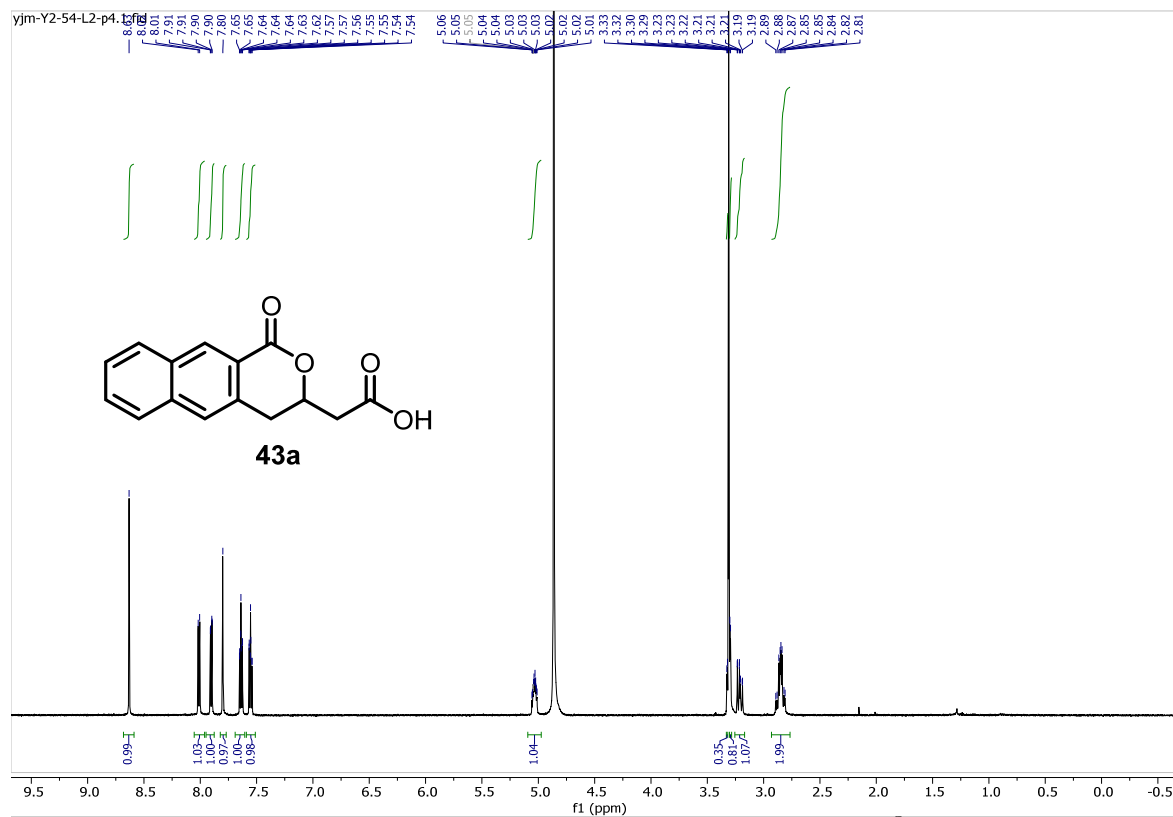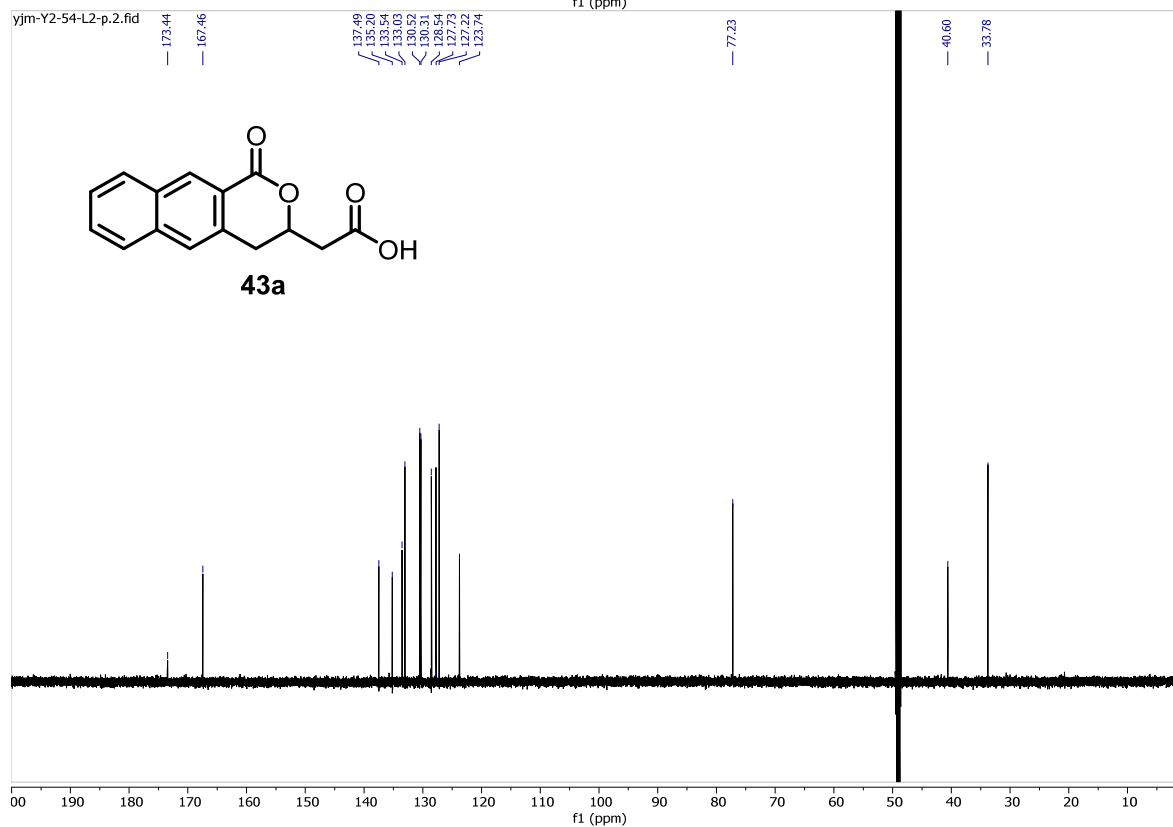

# 2-(1-Oxo-7-(trifluoromethyl)isochroman-3-yl)acetic acid 44a

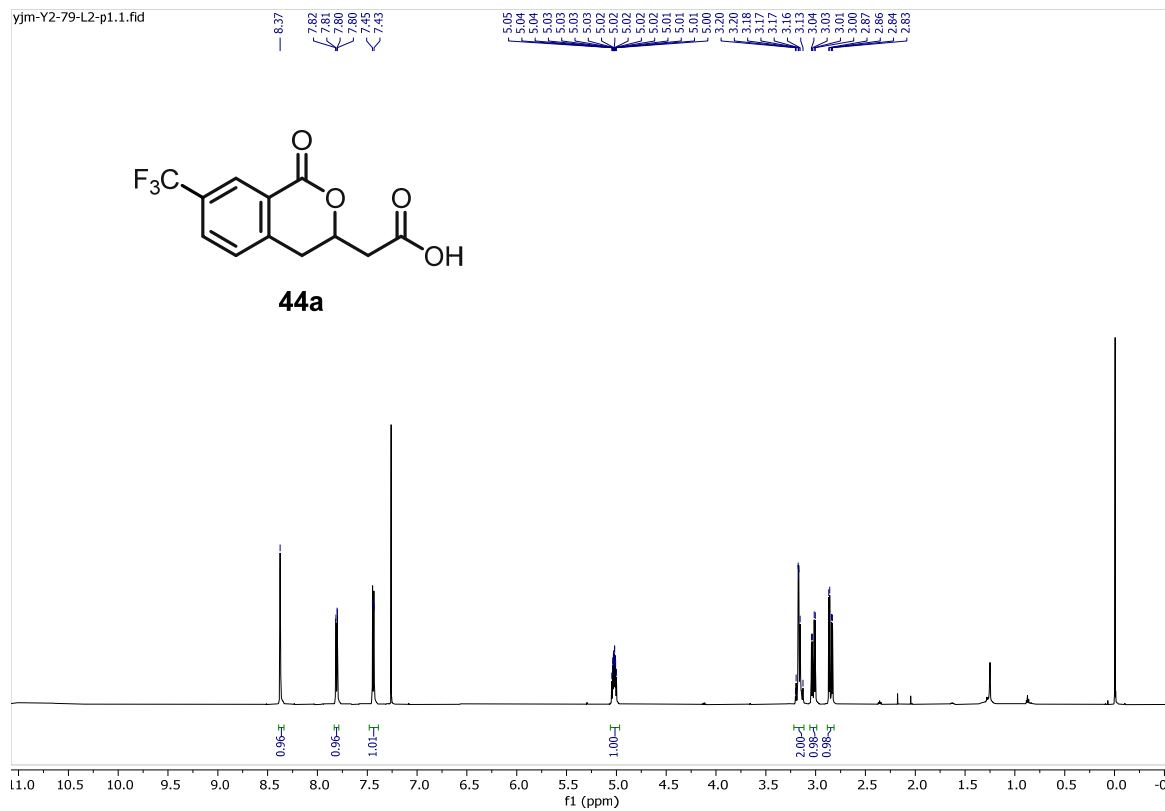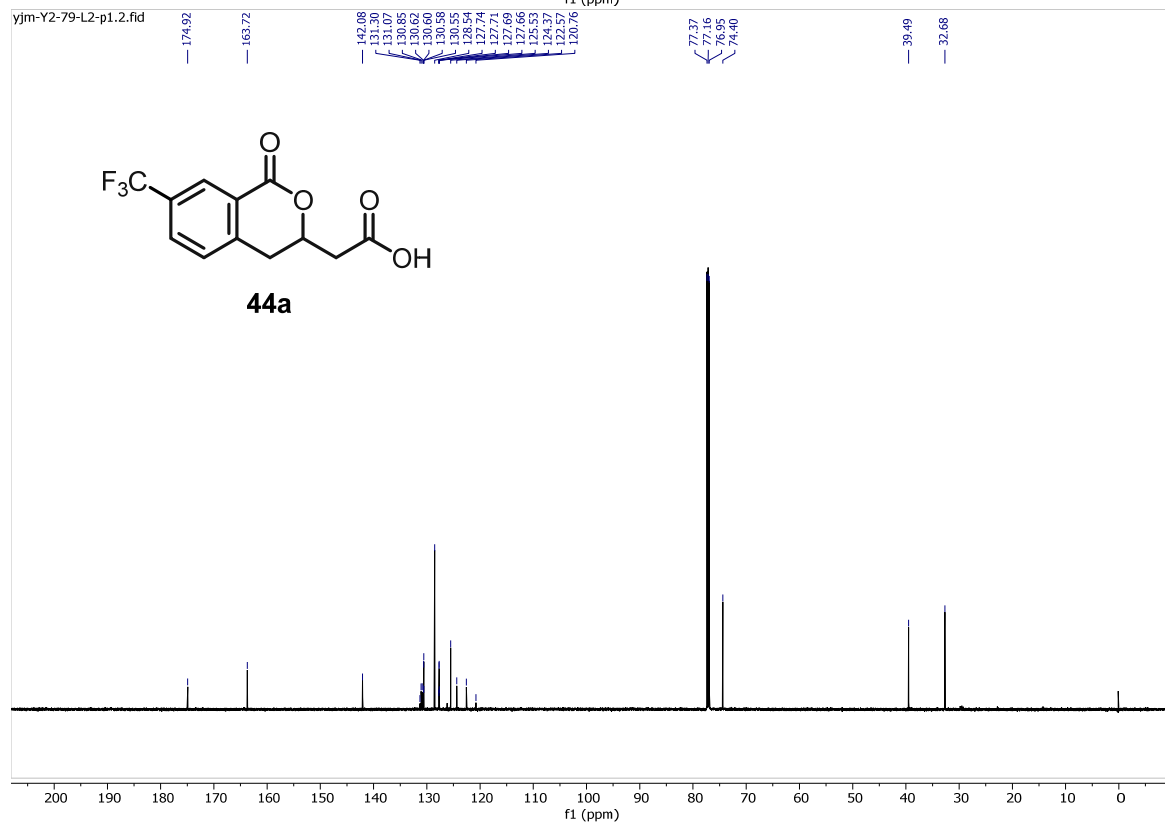

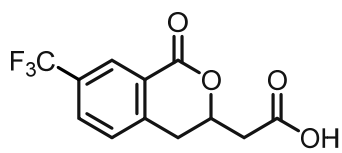

44a

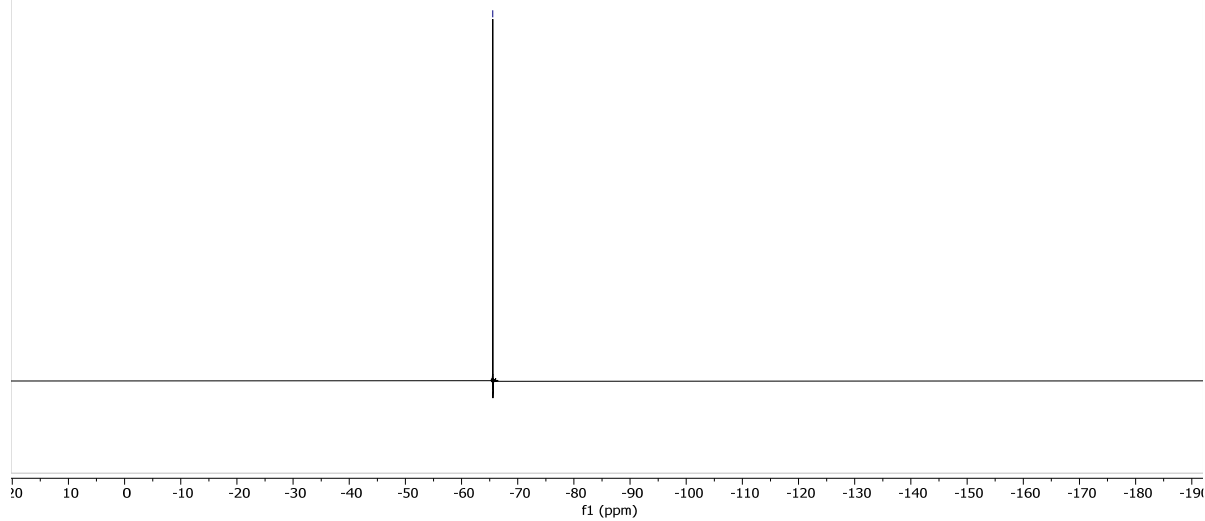





# 2,2-Dimethylhexanedioic acid 12

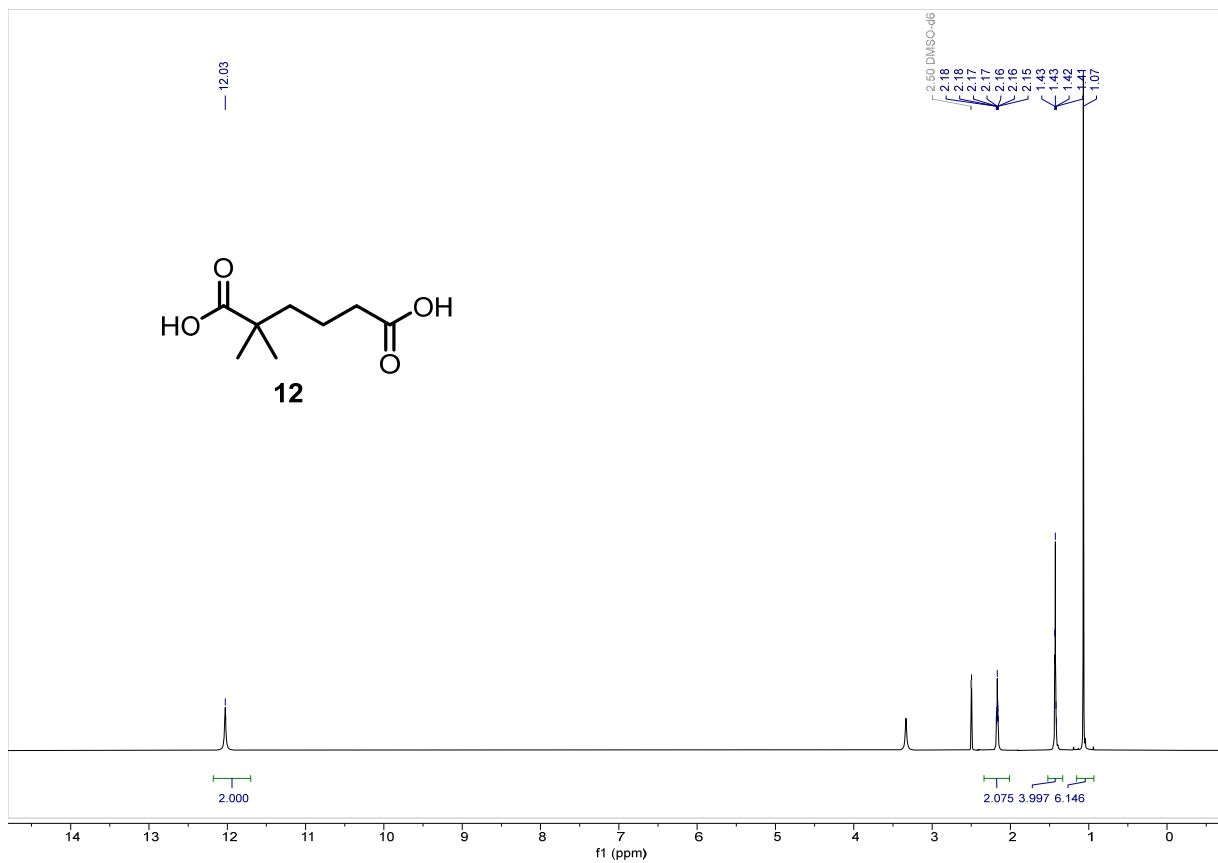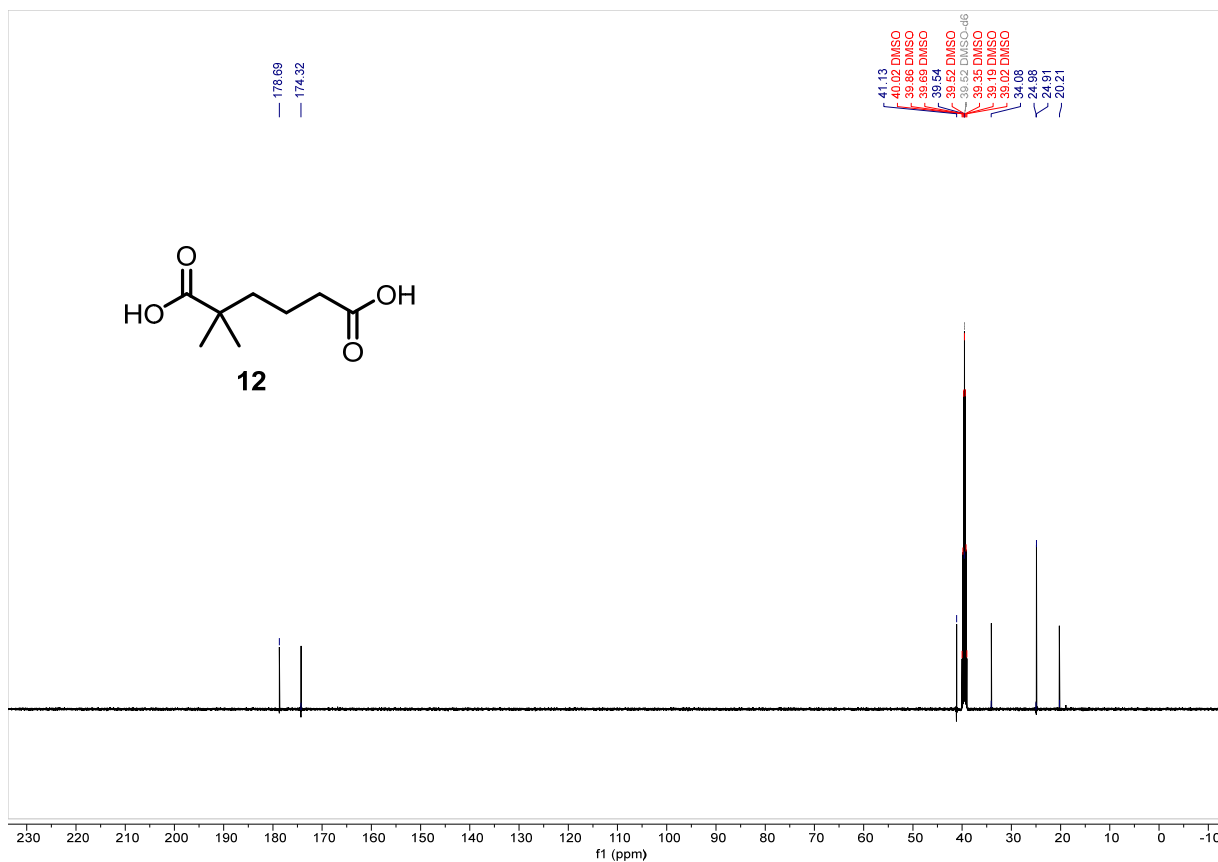

# 2,2-Diethylhexanedioic acid 13

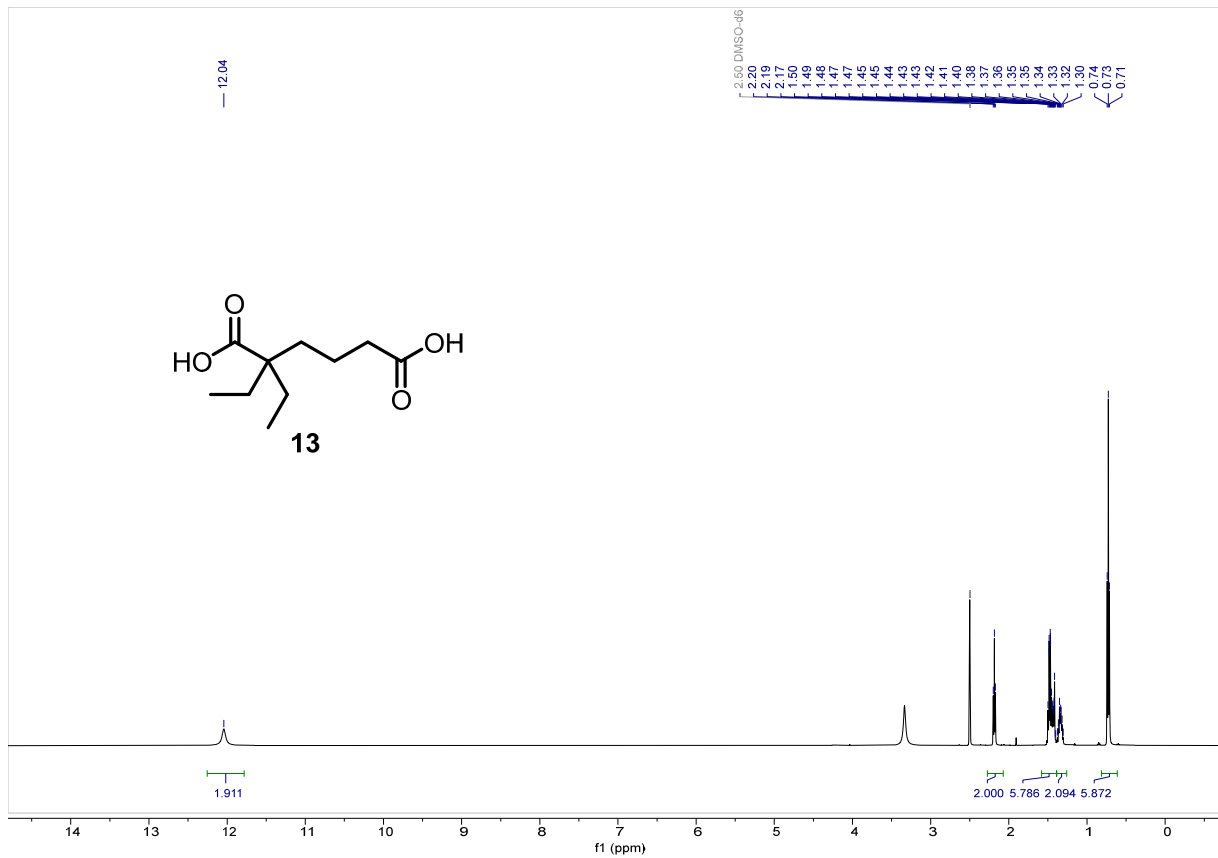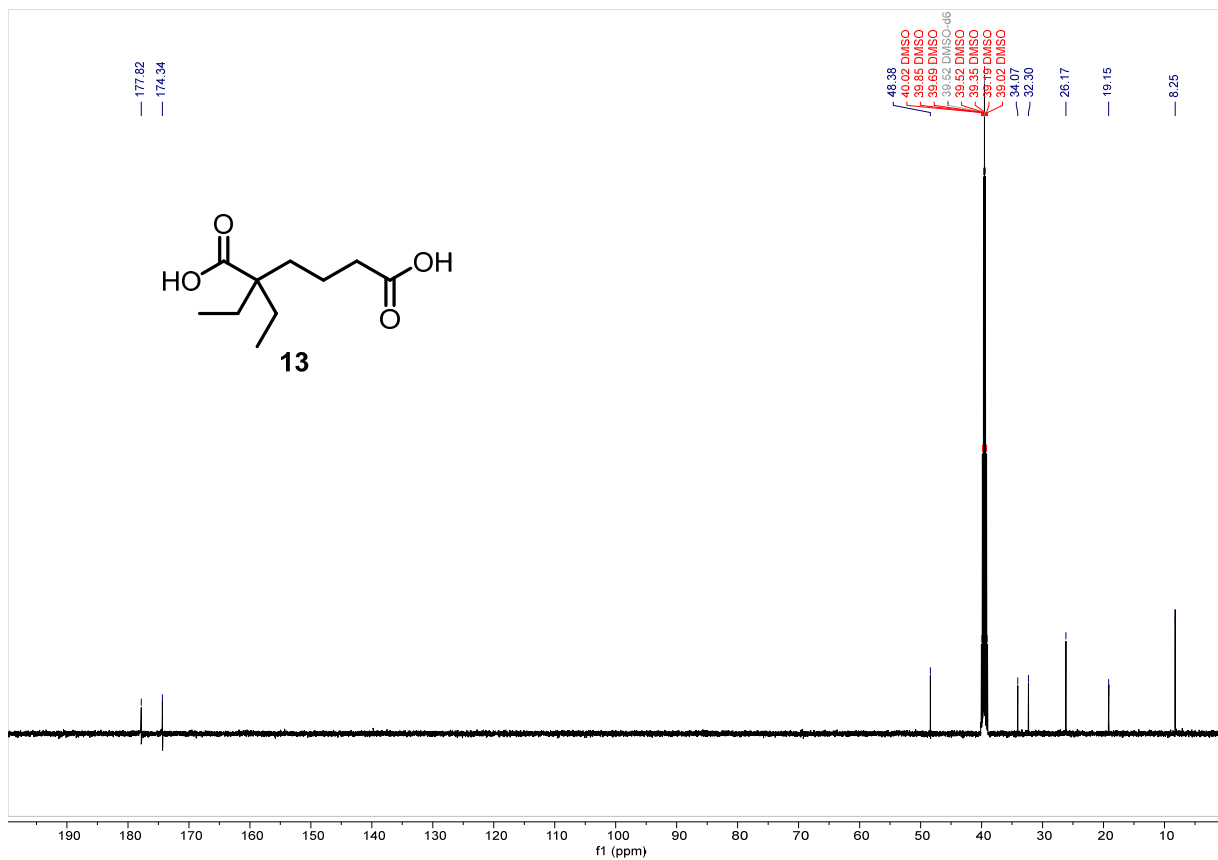

# 2-Methylhexanedioic acid 6

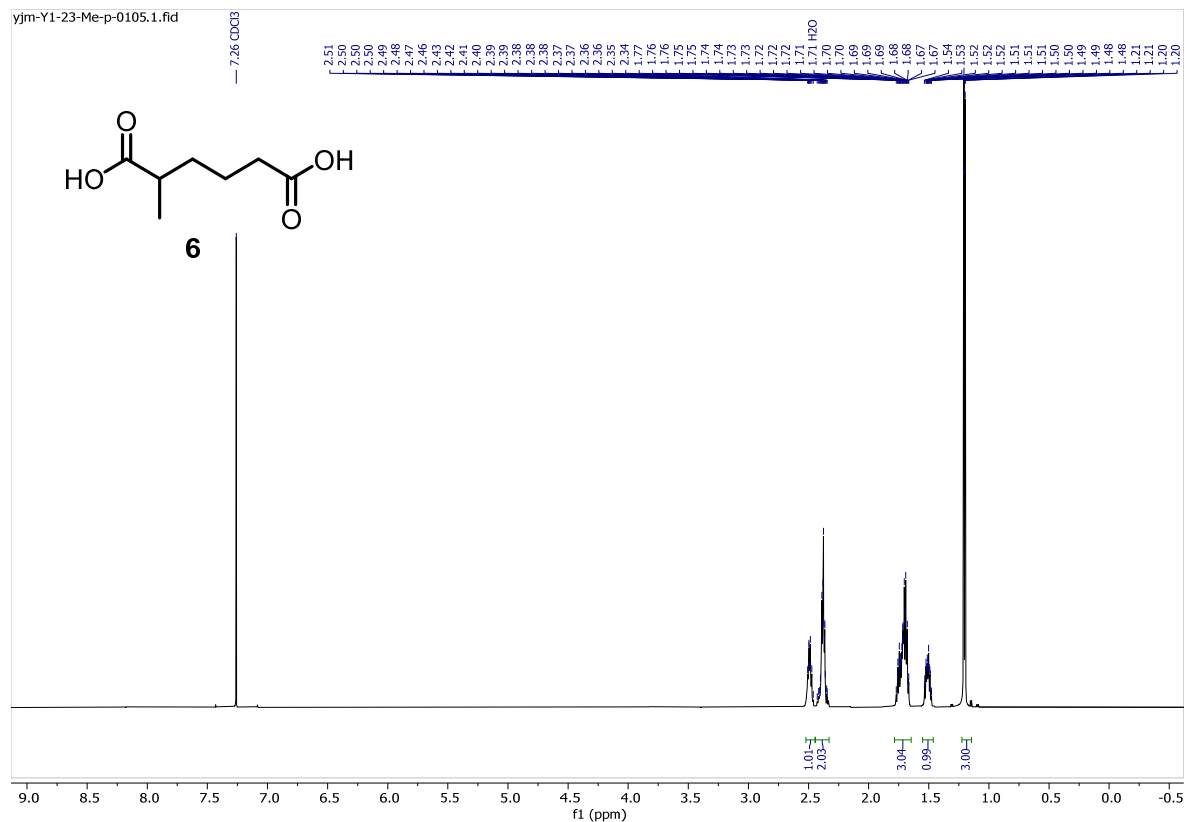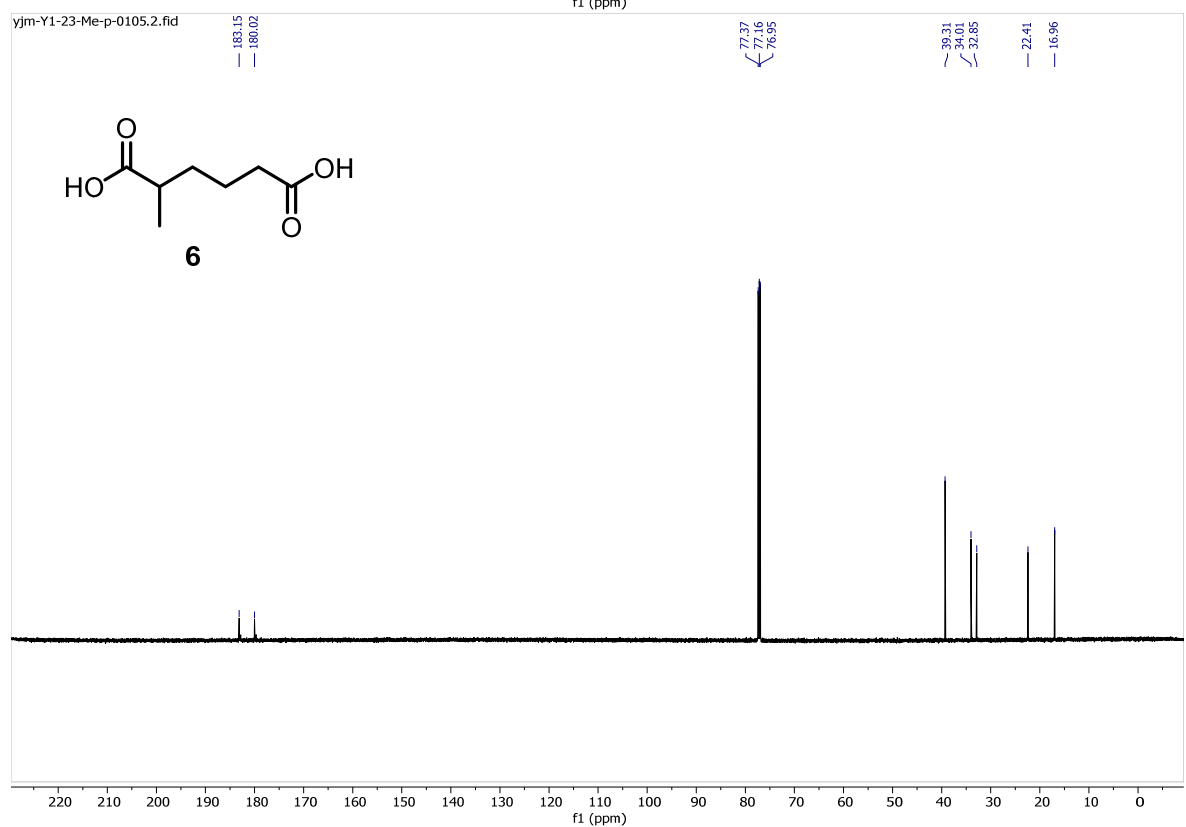

# 2-Ethylhexanedioic acid 7

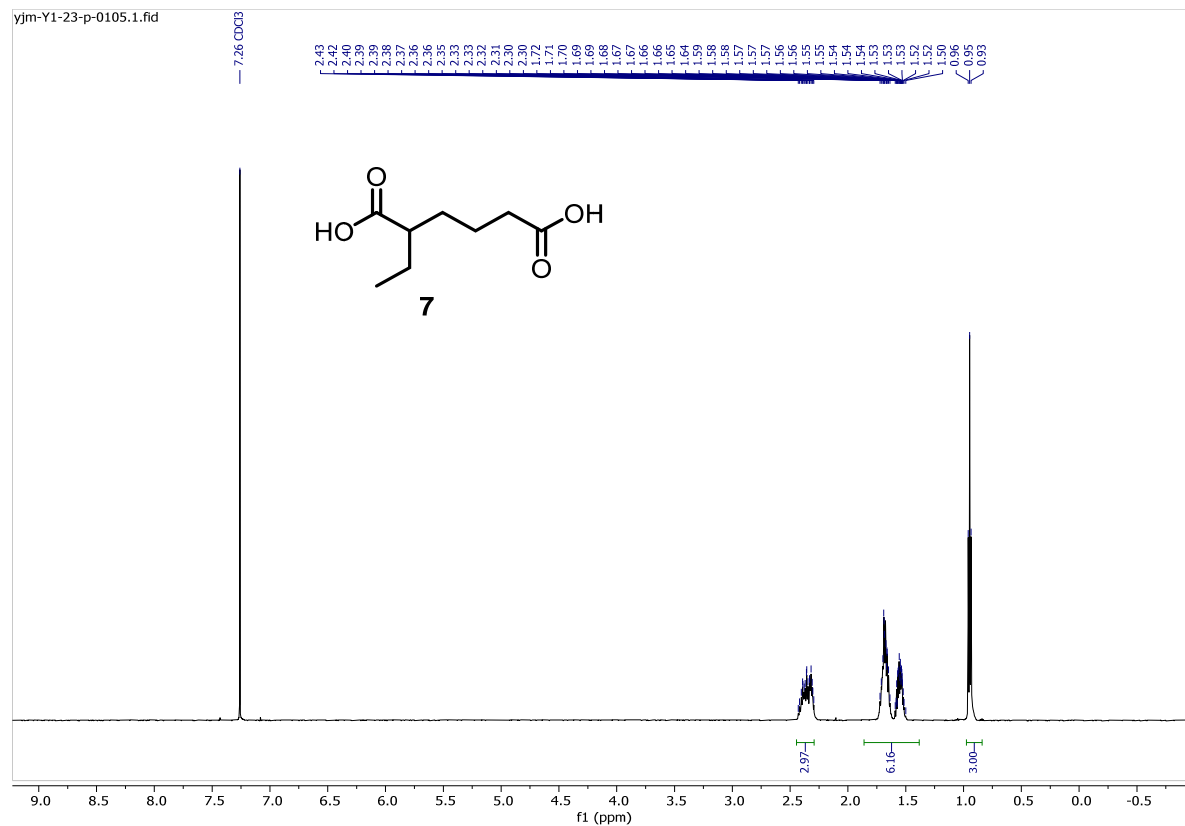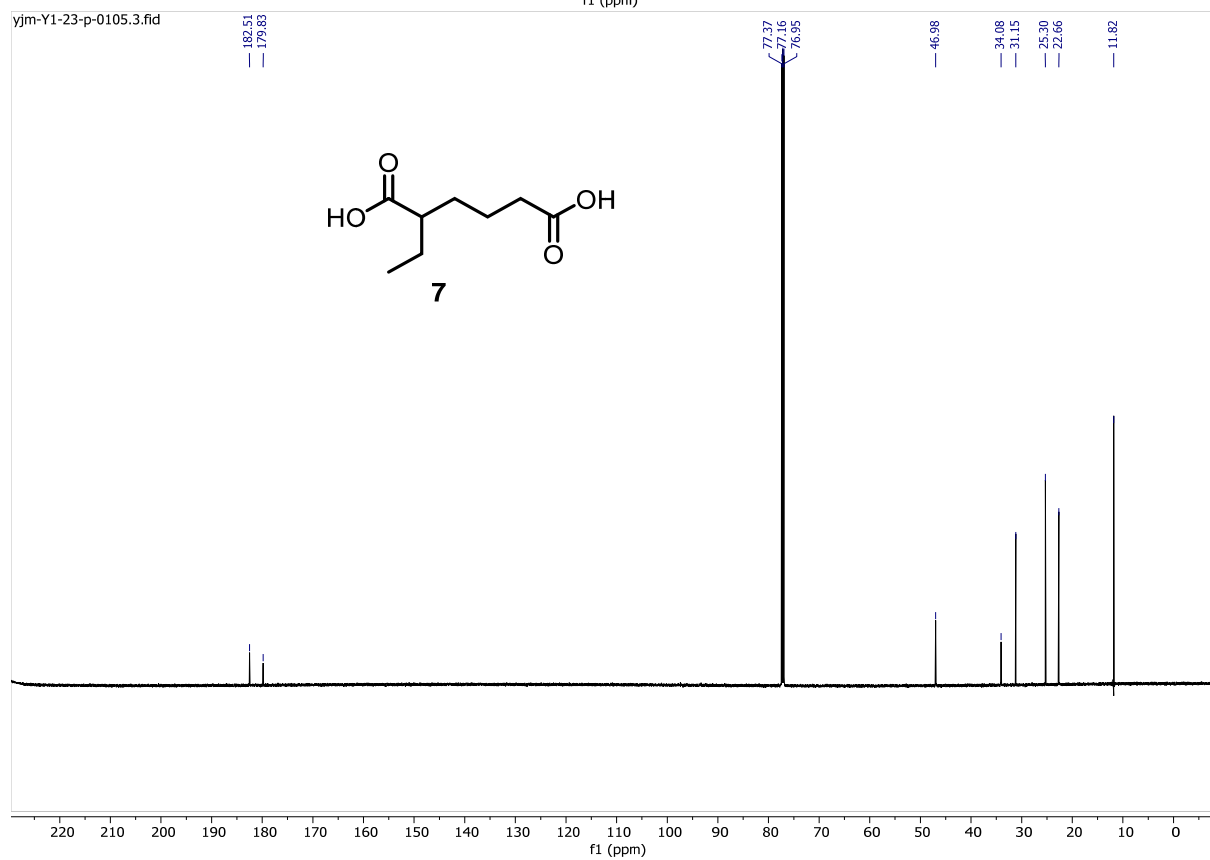

## 2-Isopropylhexanedioic acid **8**

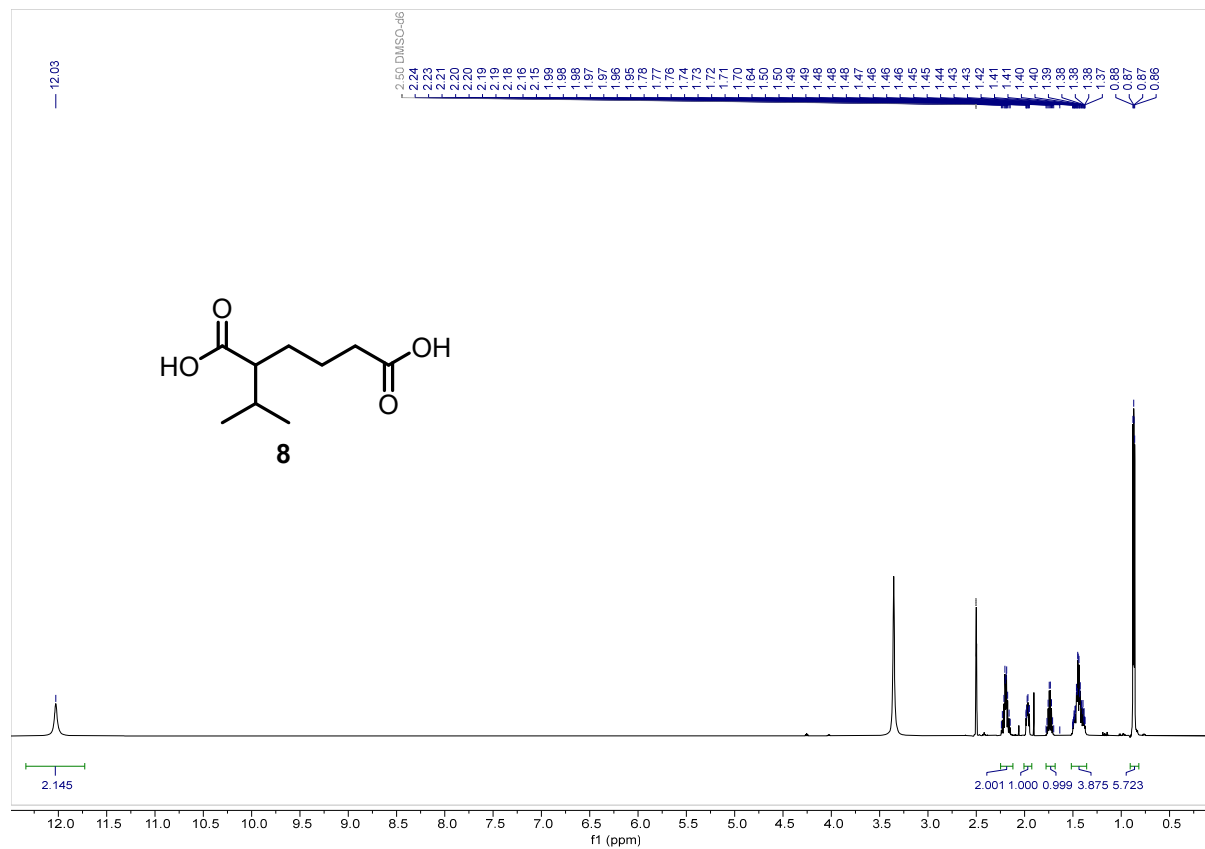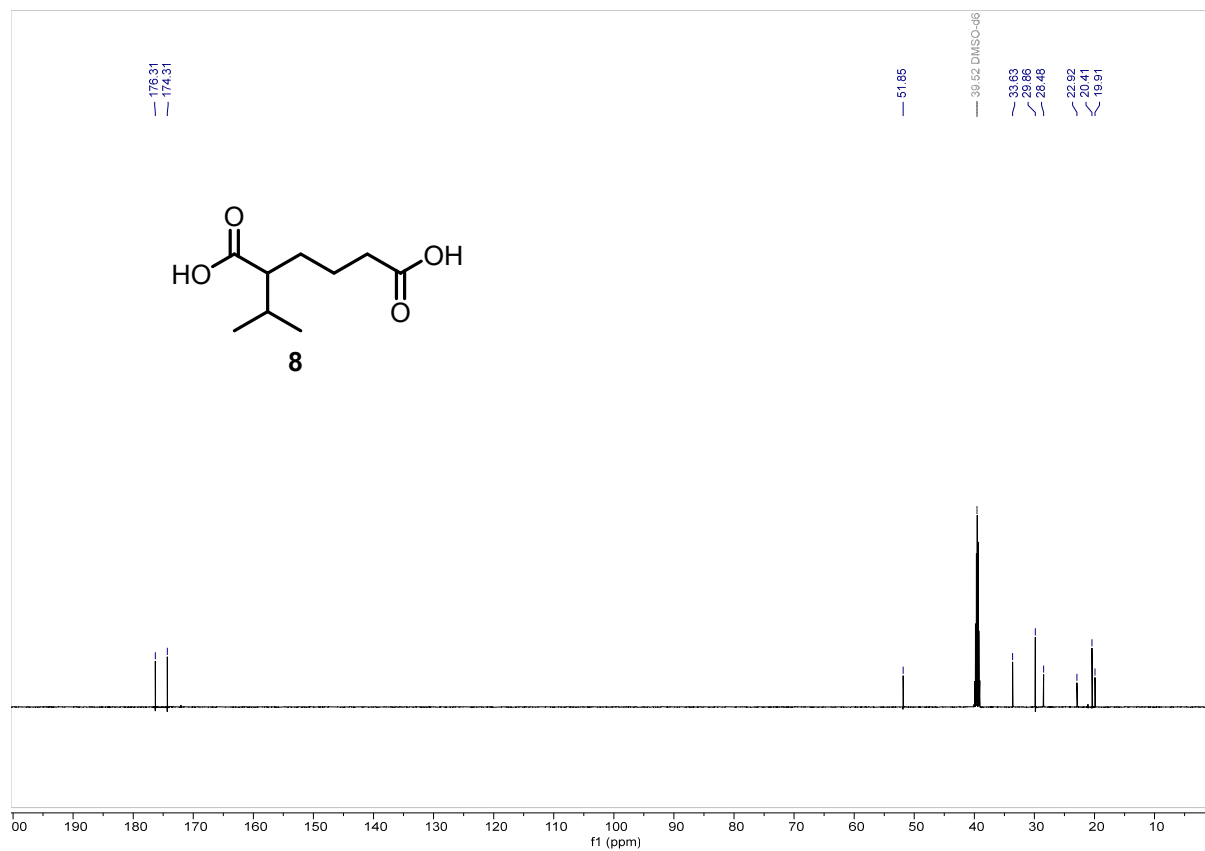

## 2-Benzylhexanedioic acid 9

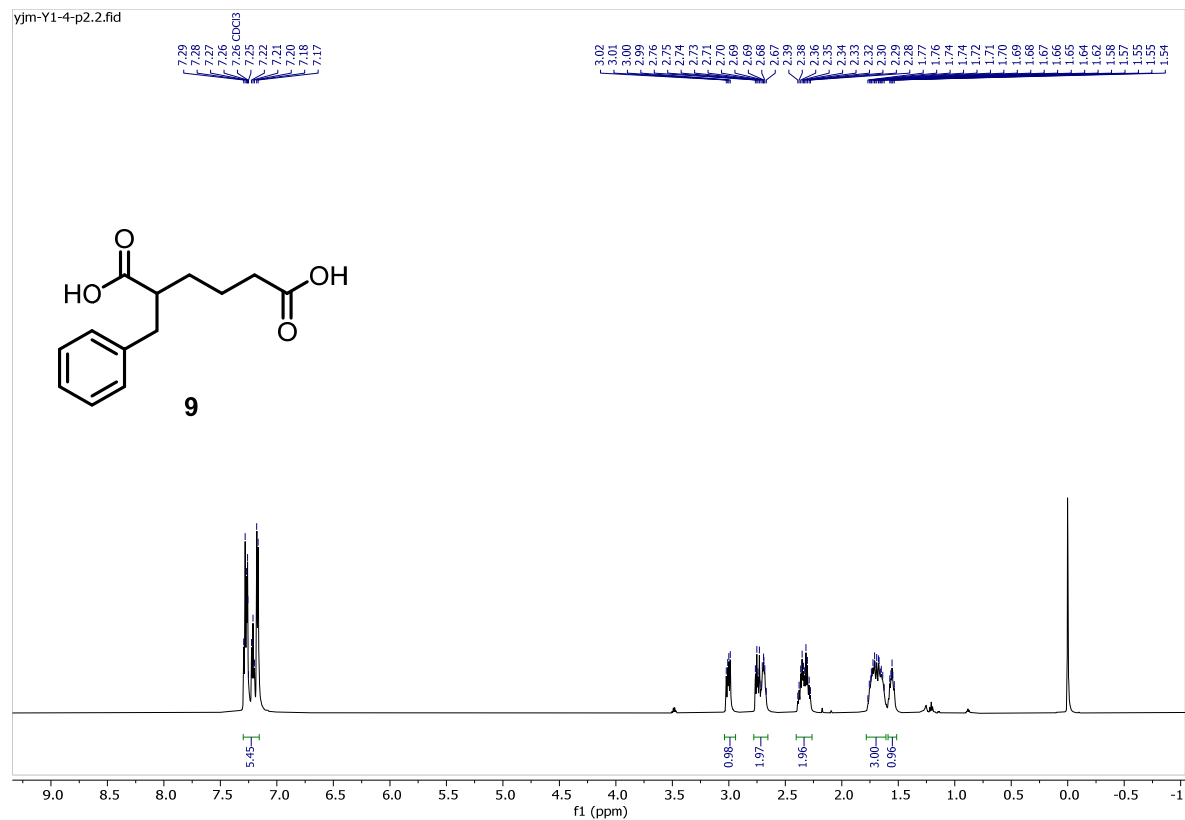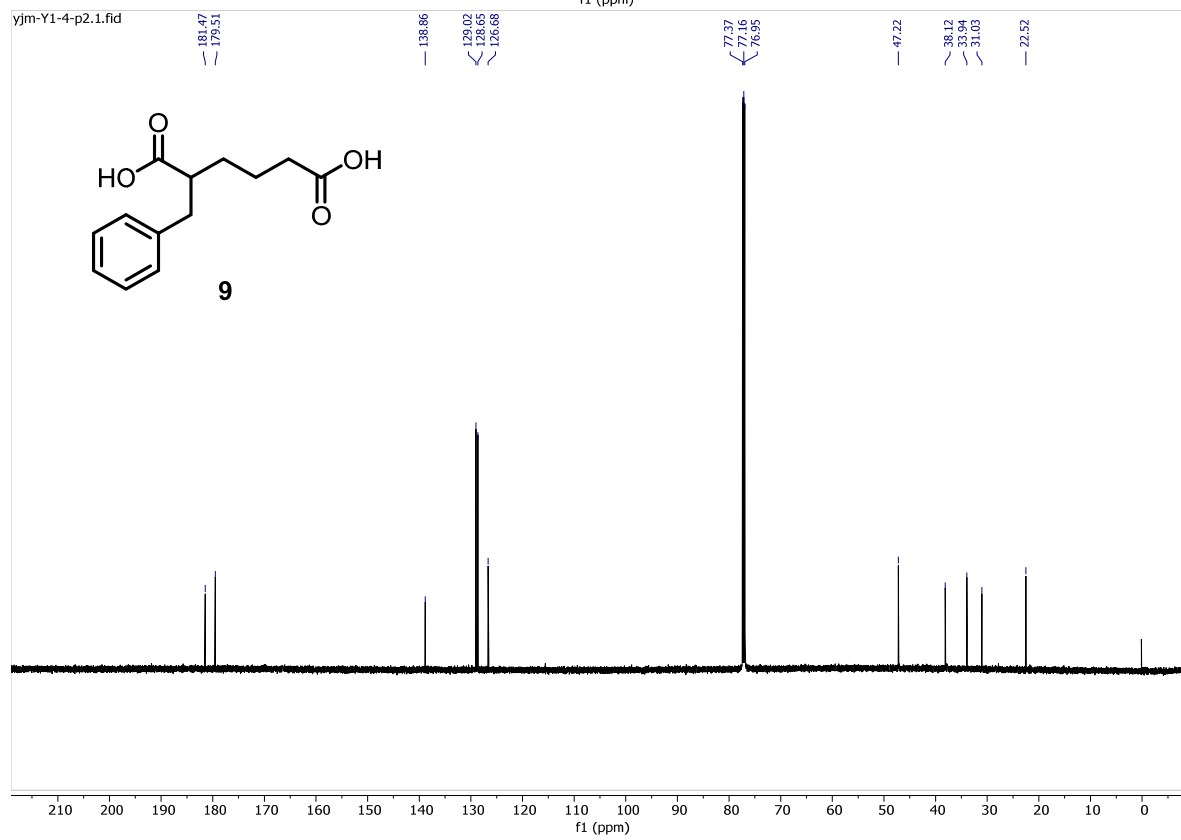

# 2-(*tert*-Butyl)hexanedioic acid 10

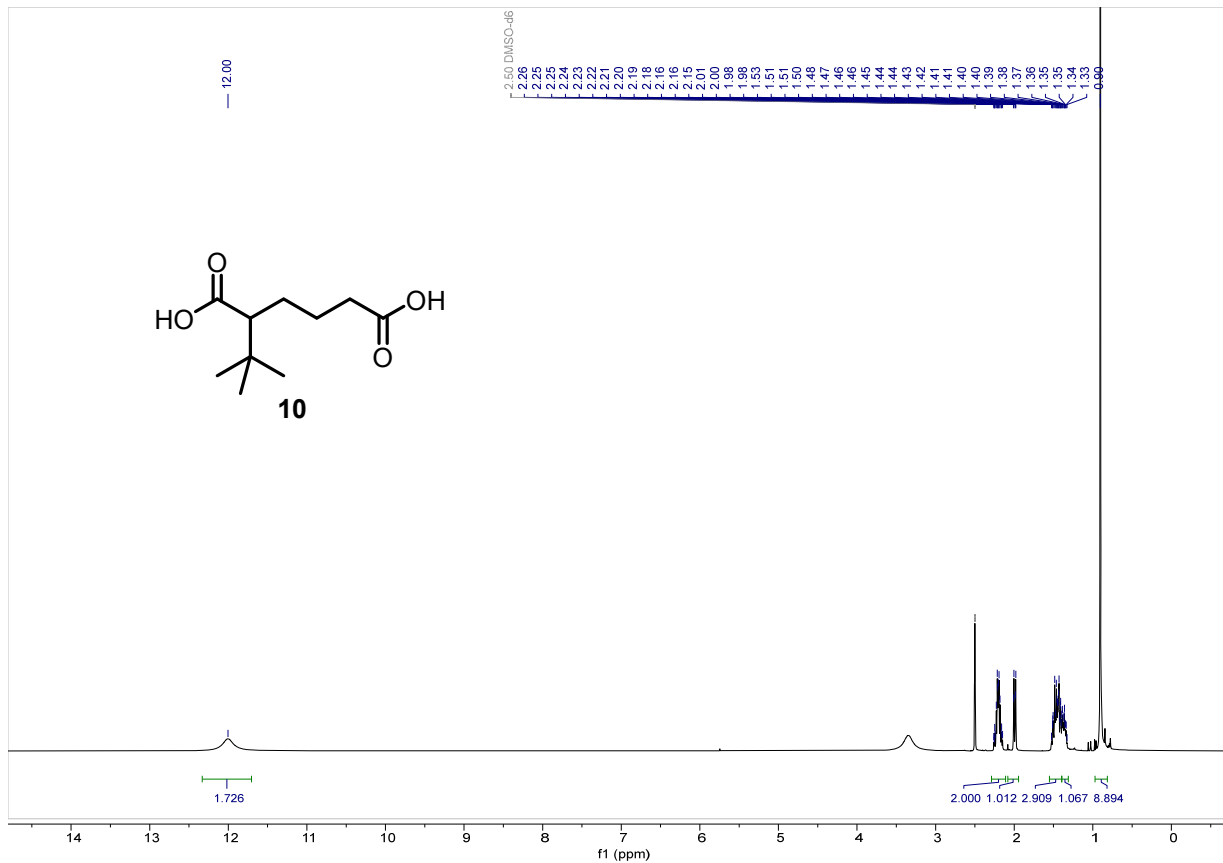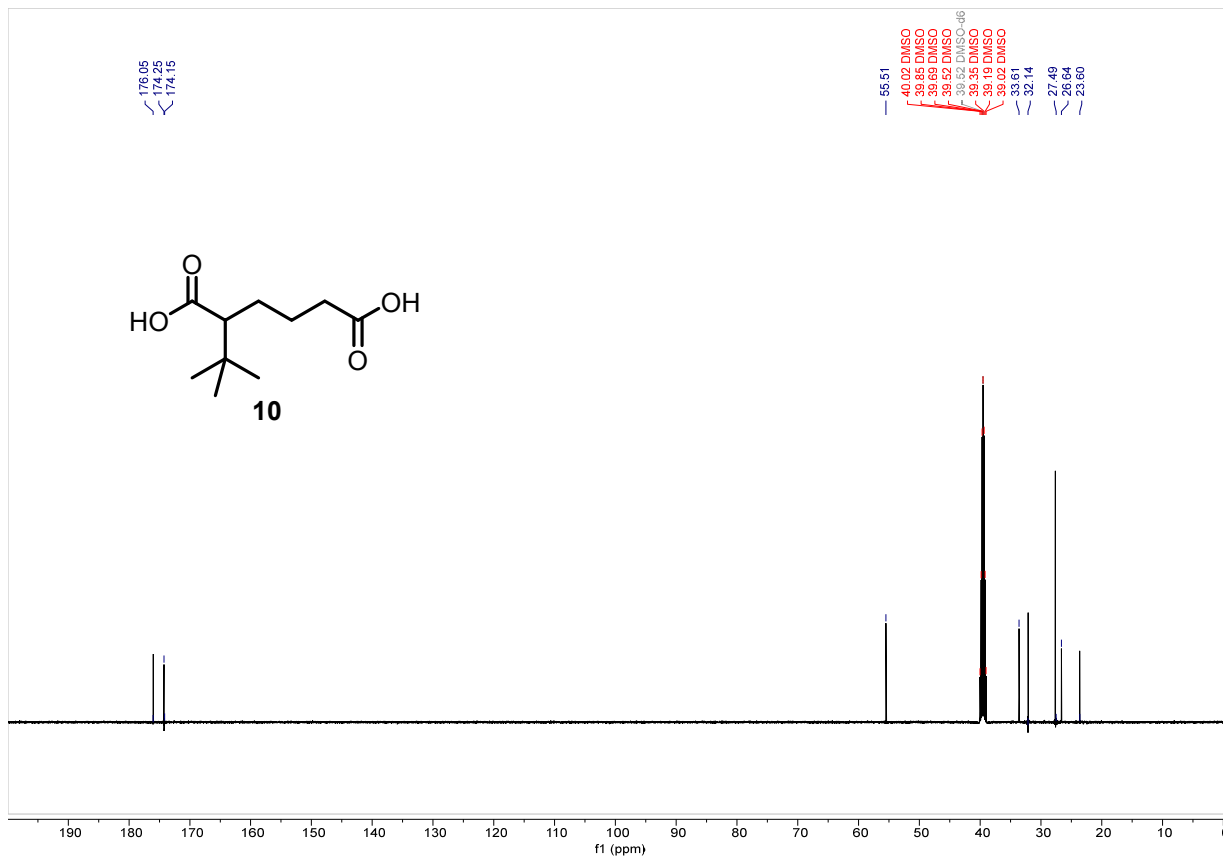

**(S)-2-(1,3-dioxisoindolin-2-yl)hexanedioic acid 11**

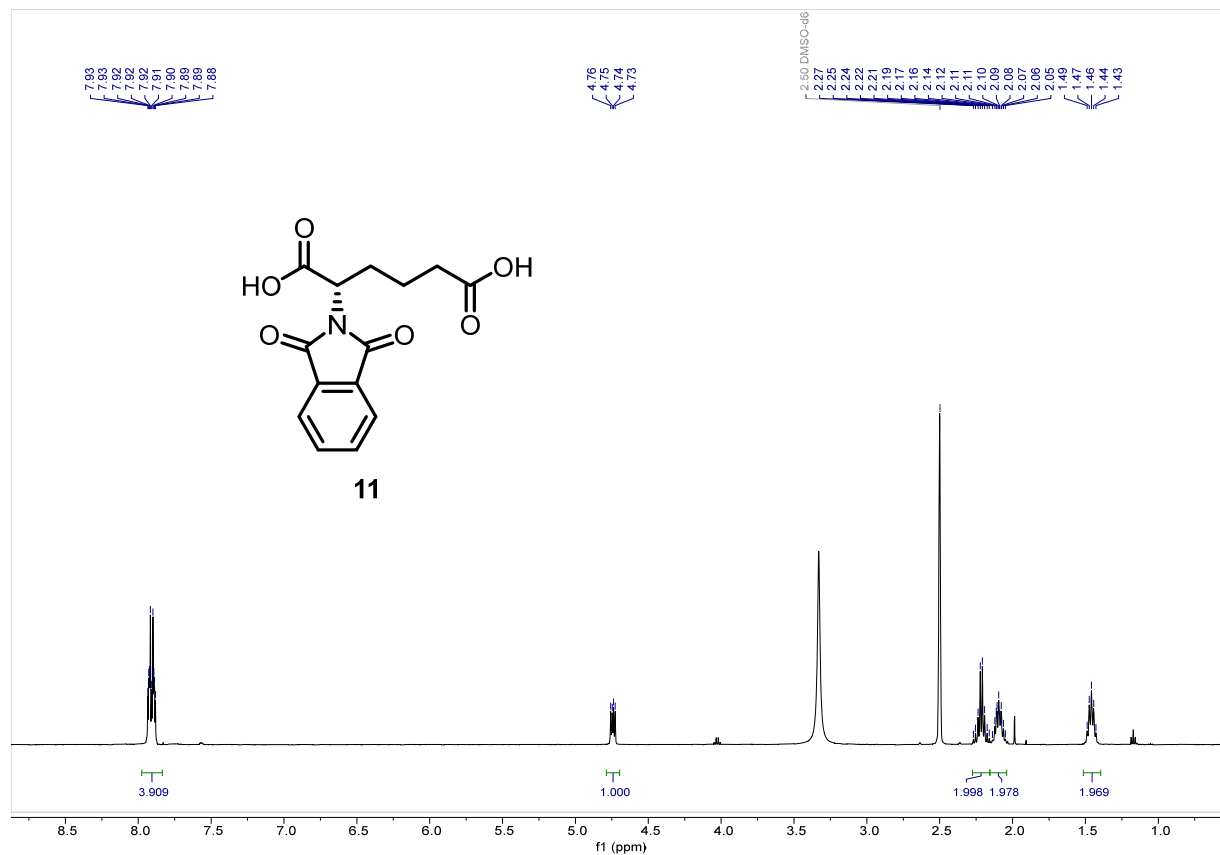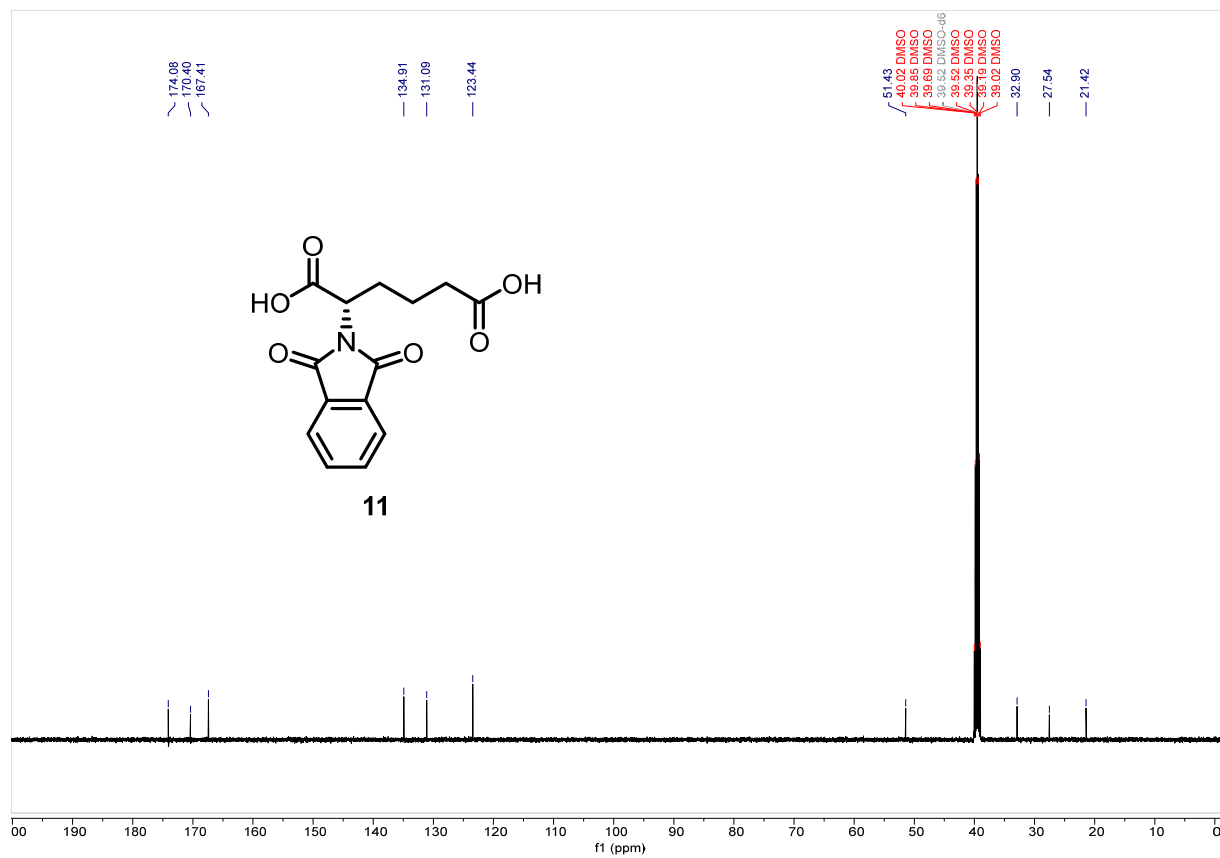



# 1-(3-Carboxypropyl)cyclopropane-1-carboxylic acid **16**

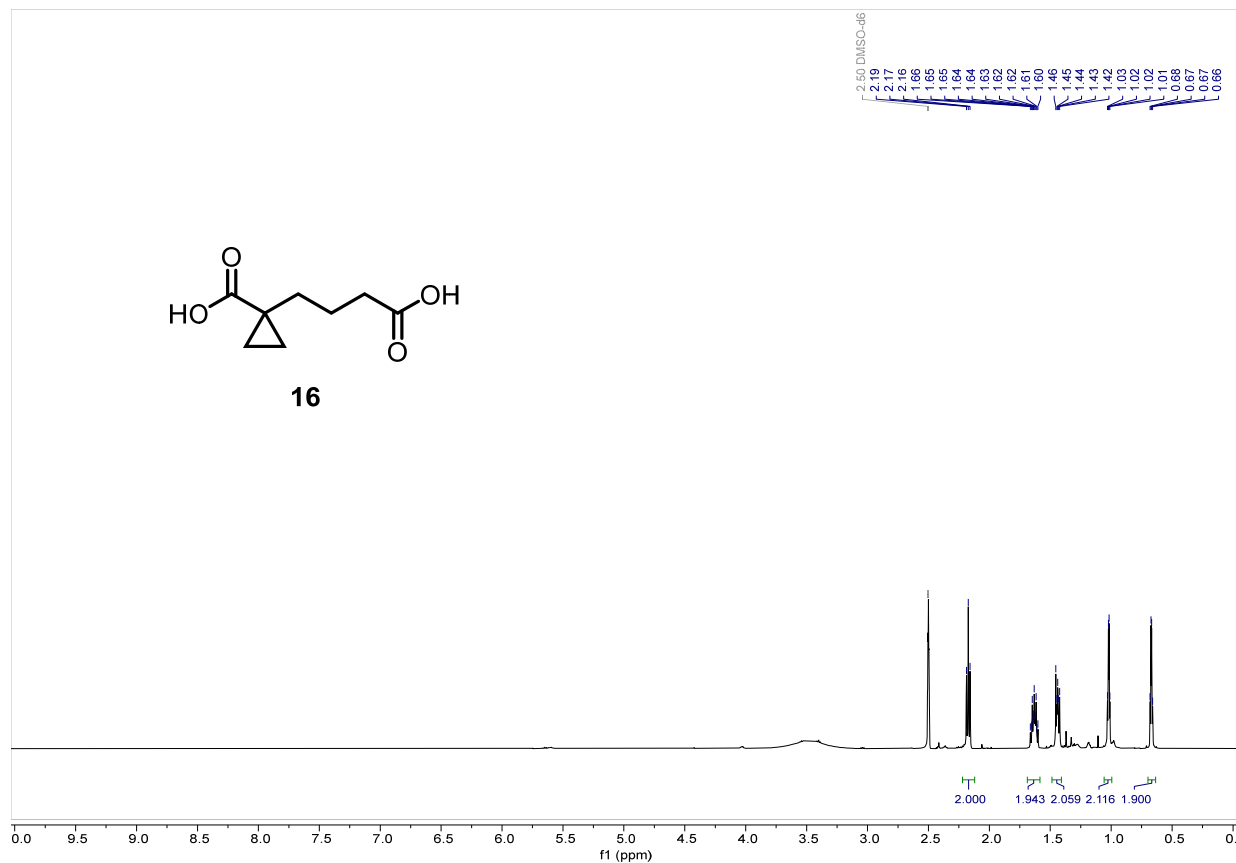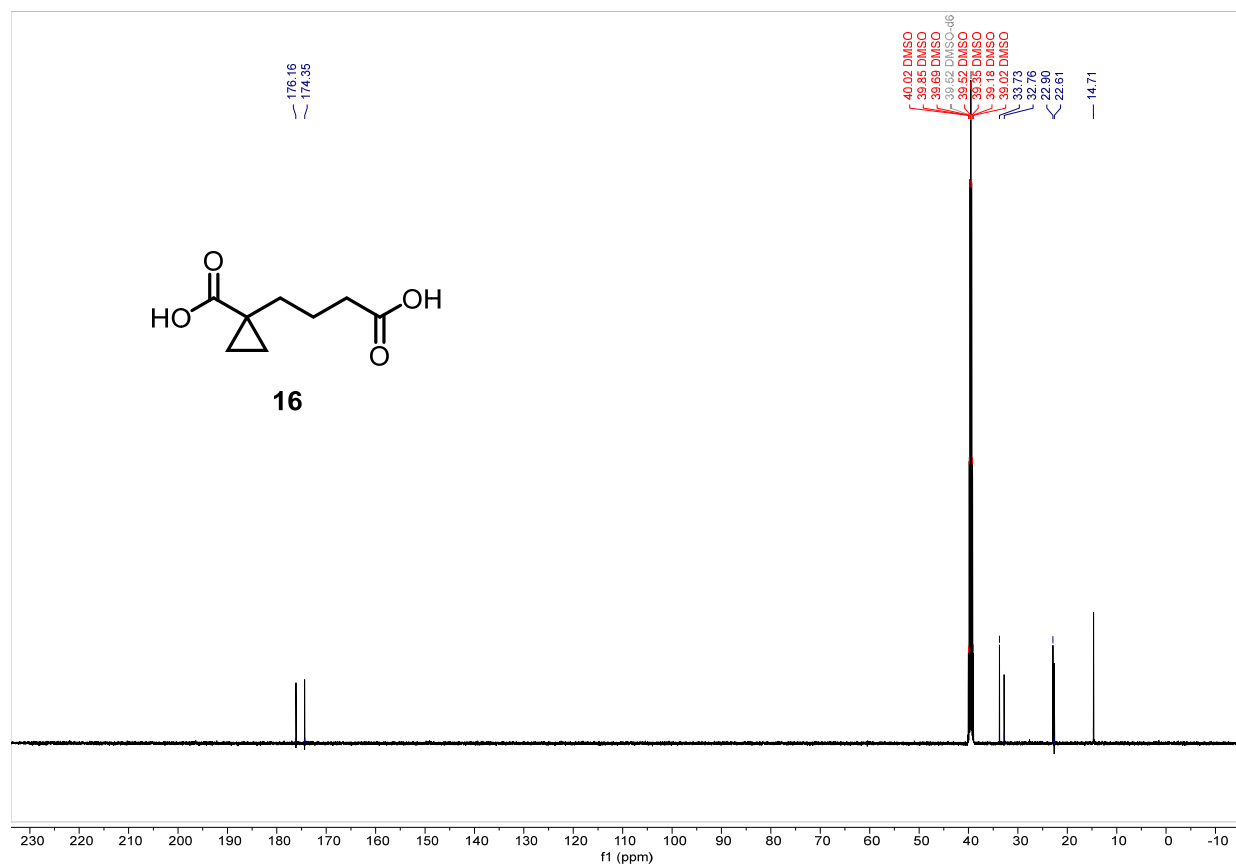

# 1-(3-Carboxypropyl)cyclobutane-1-carboxylic acid 17

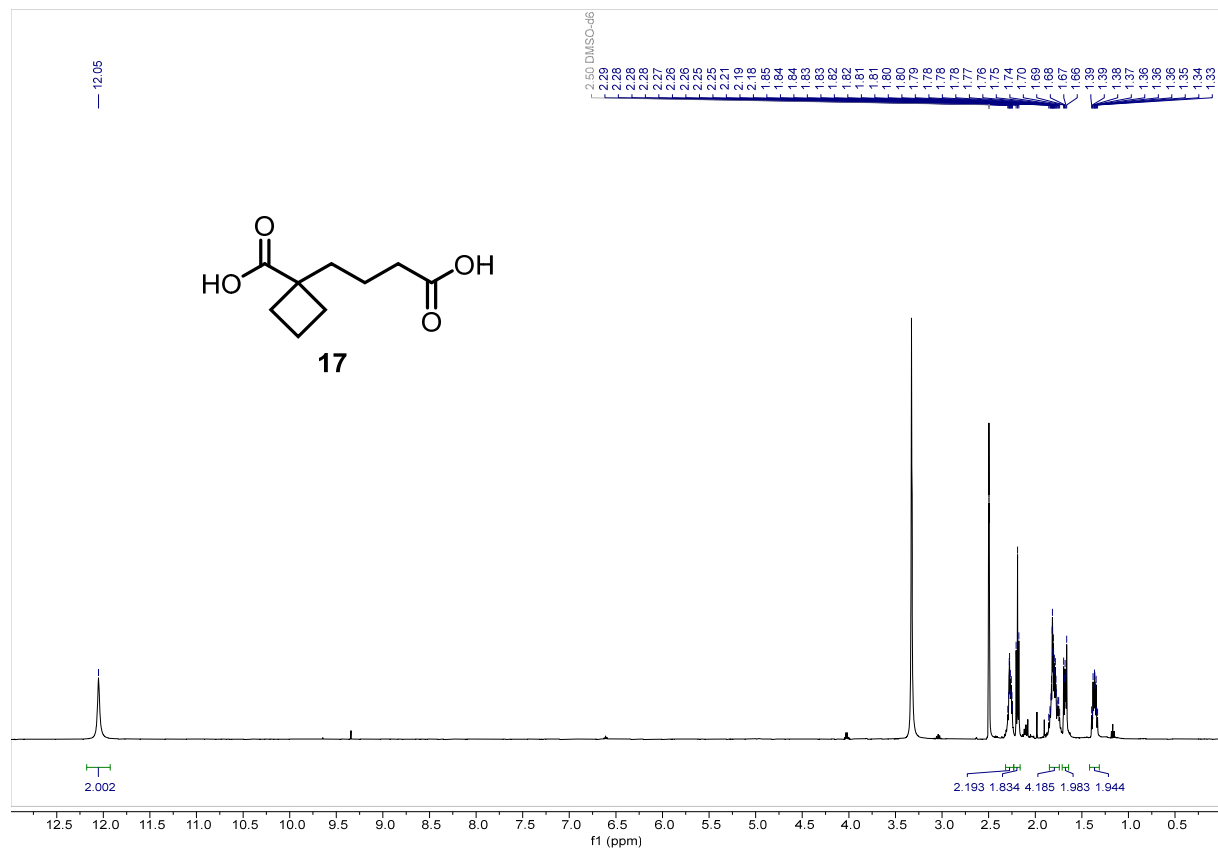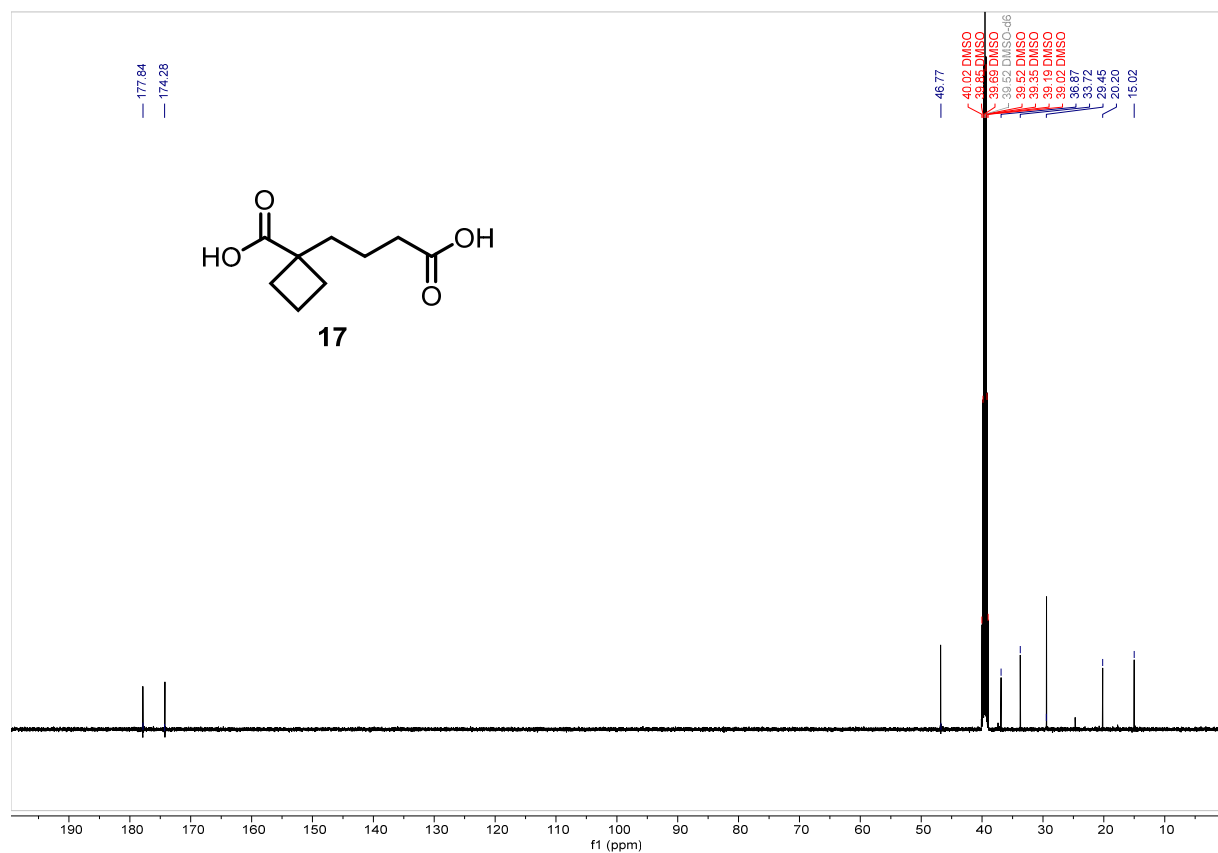

# 1-(3-Carboxypropyl)cyclopentane-1-carboxylic acid **18**

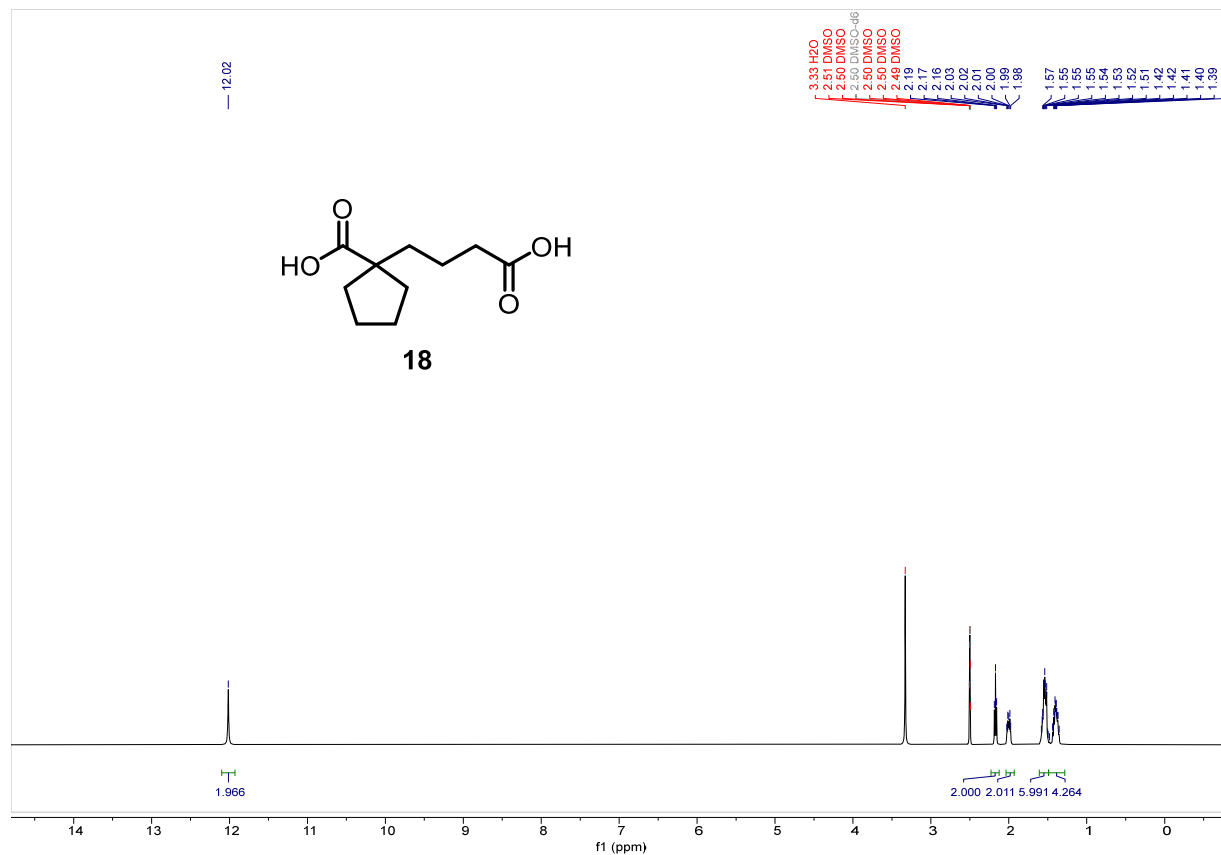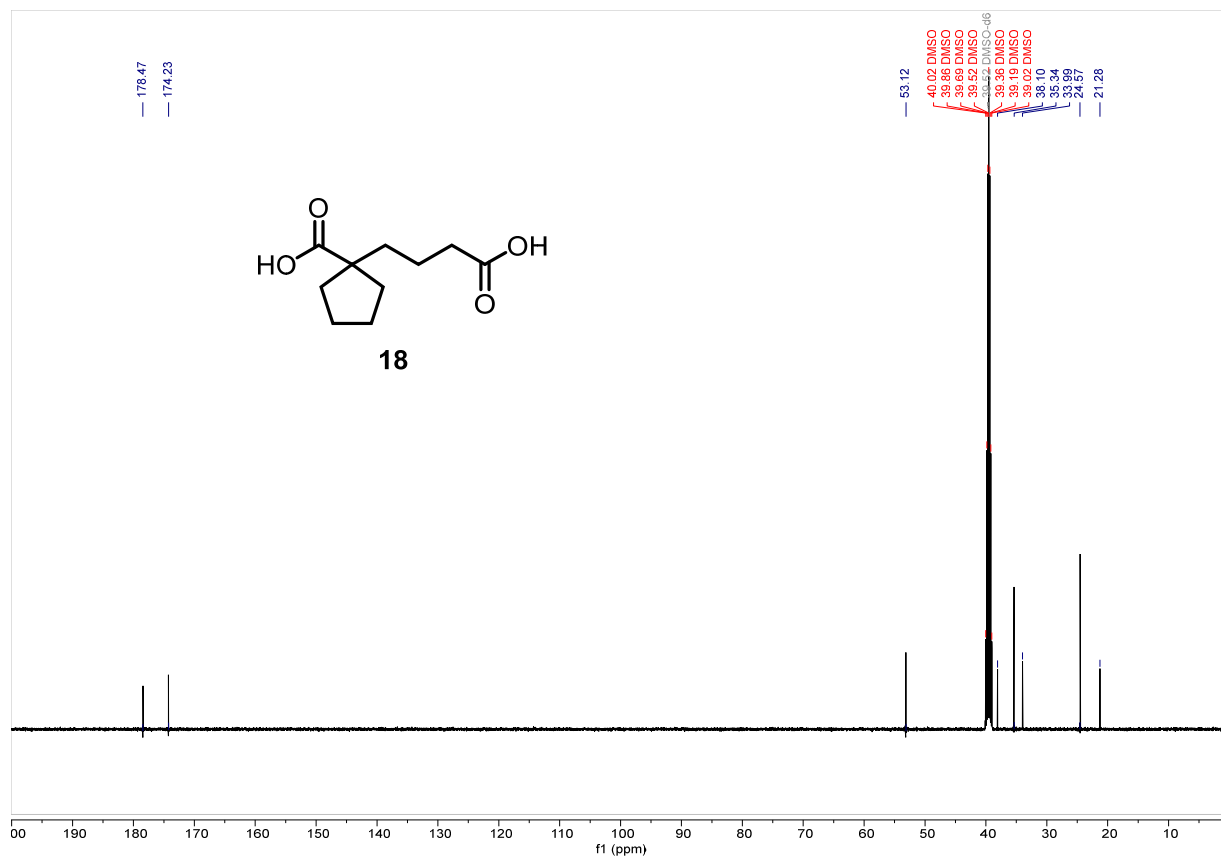

# 1-(3-Carboxypropyl)cyclohexane-1-carboxylic acid **19**

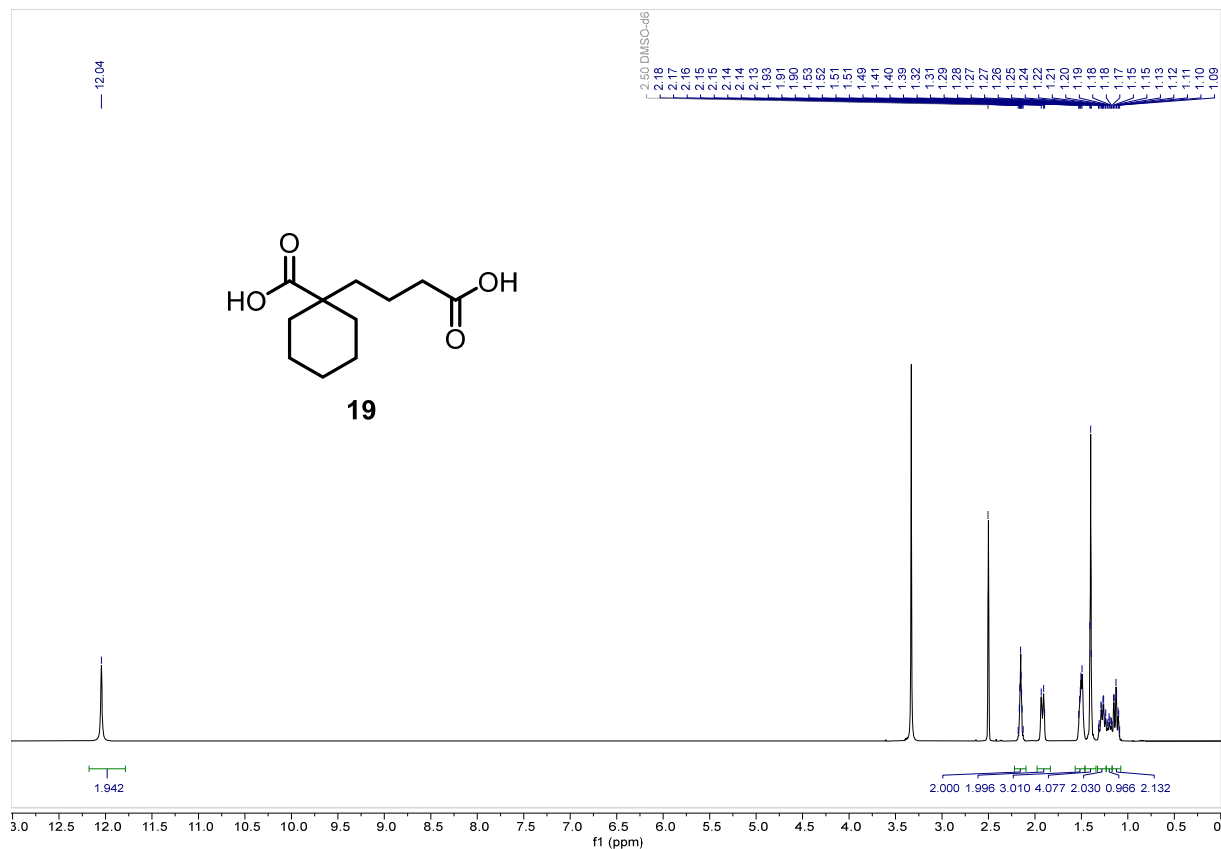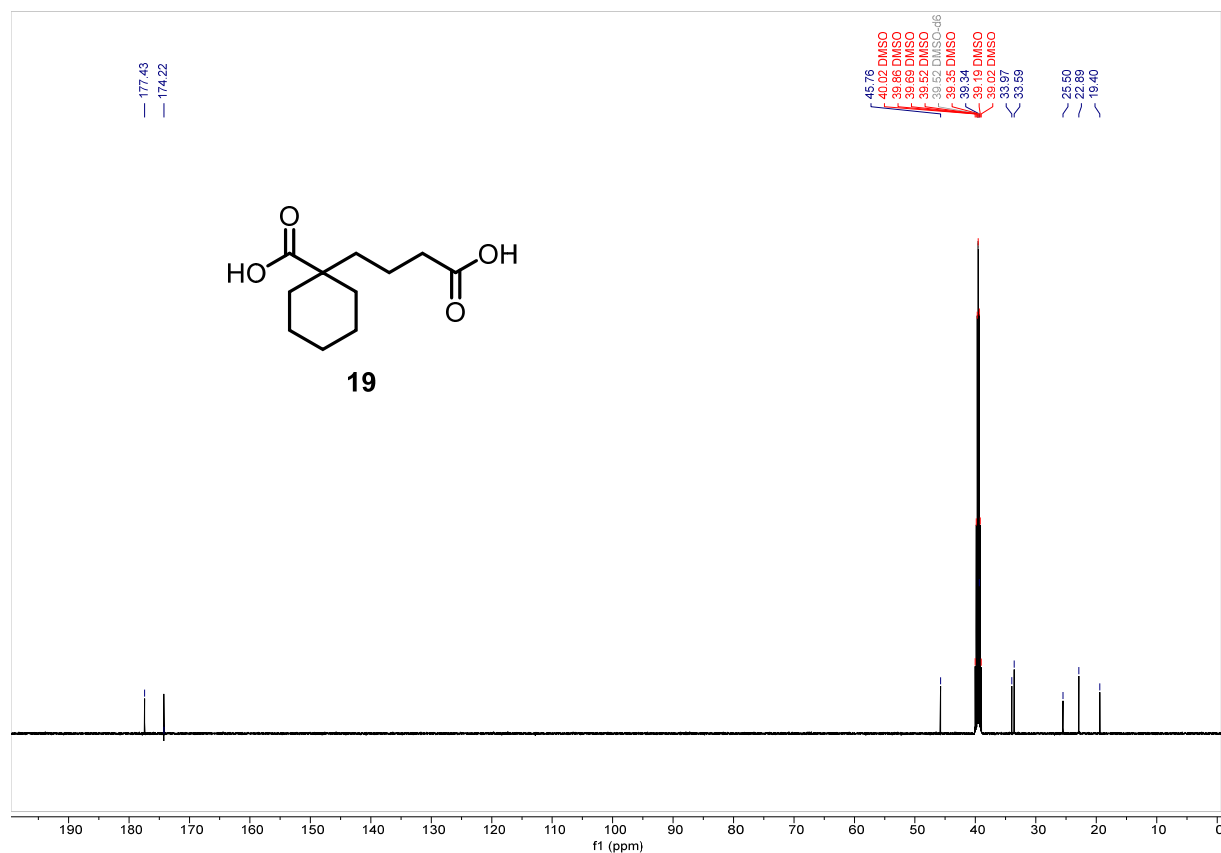

4-(*tert*-Butyl)-1-(3-carboxypropyl)cyclohexane-1-carboxylic acid **20**

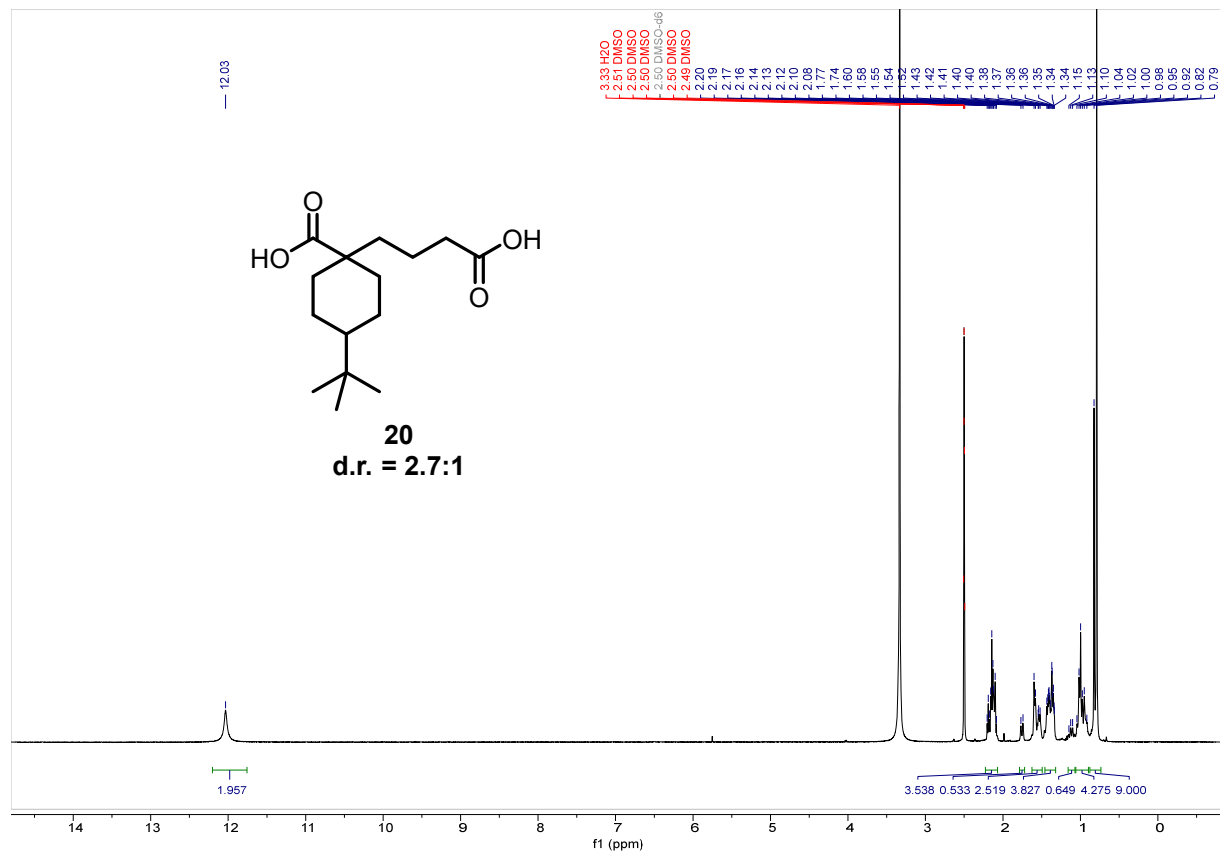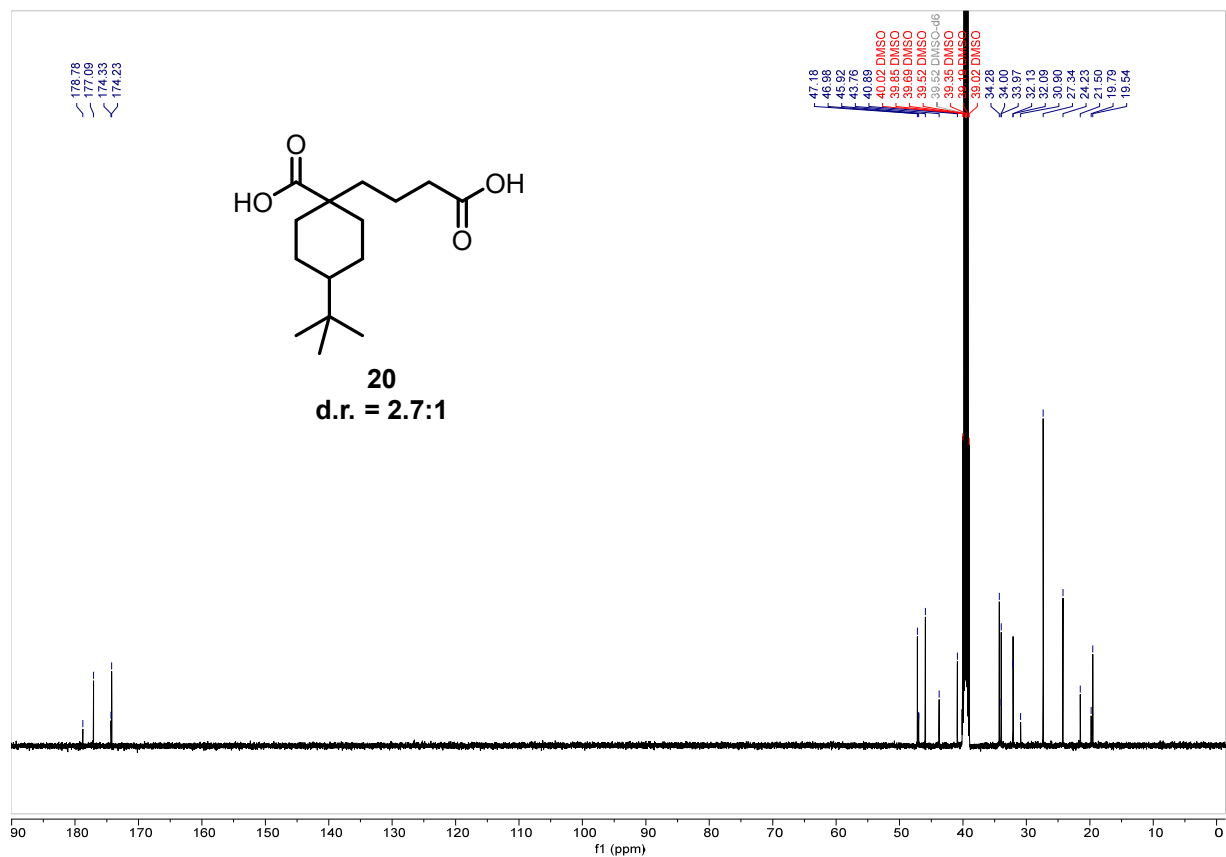

# 4-(3-Carboxypropyl)tetrahydro-2H-pyran-4-carboxylic acid **21**

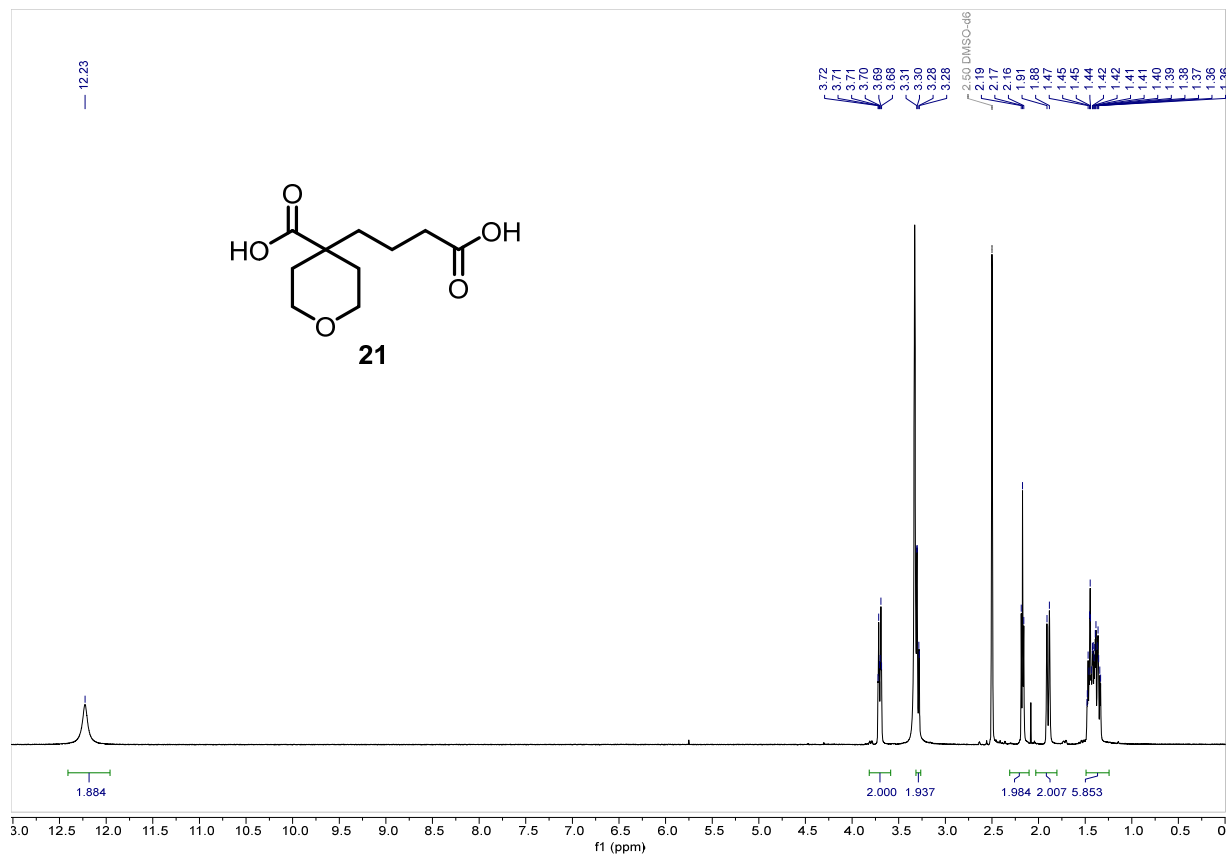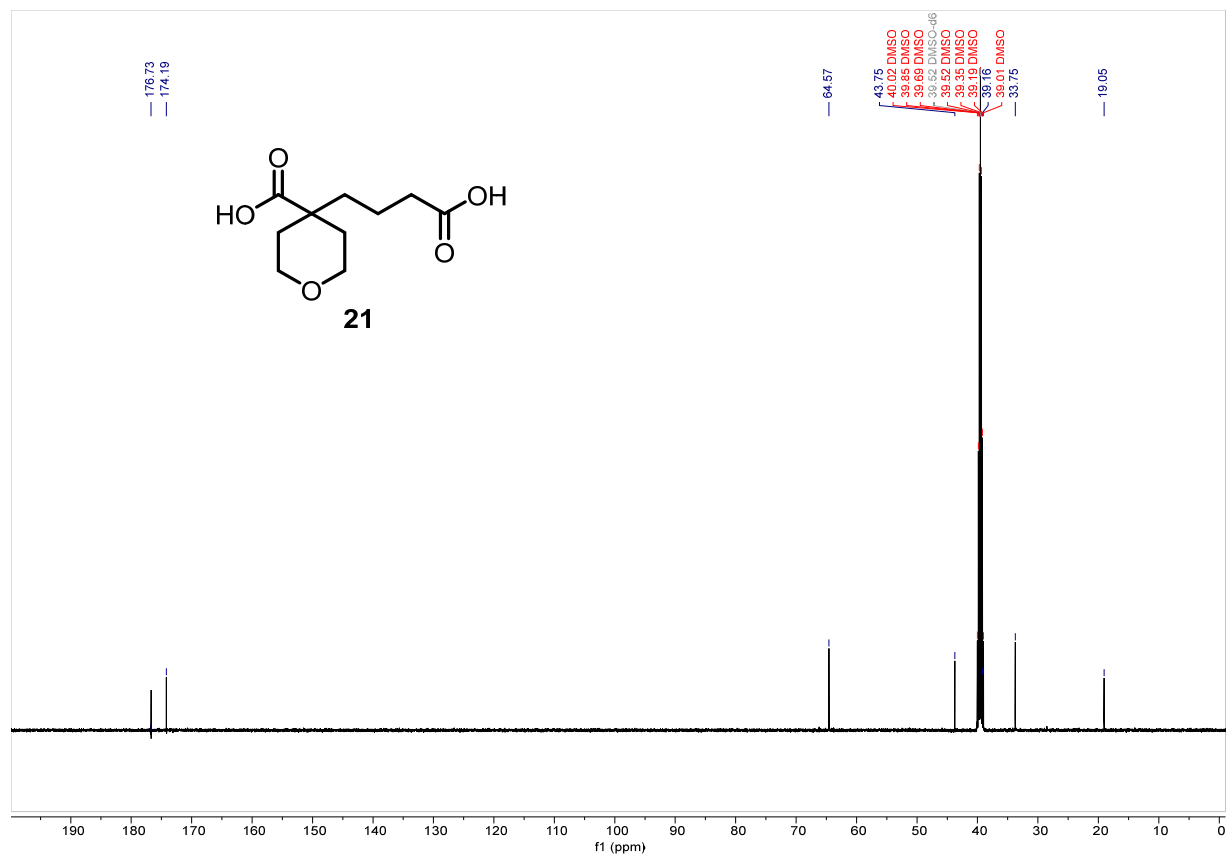

**(1*R*\*,2*R*\*)-2-(2-Carboxyethyl)cyclohexane-1-carboxylic acid 23**

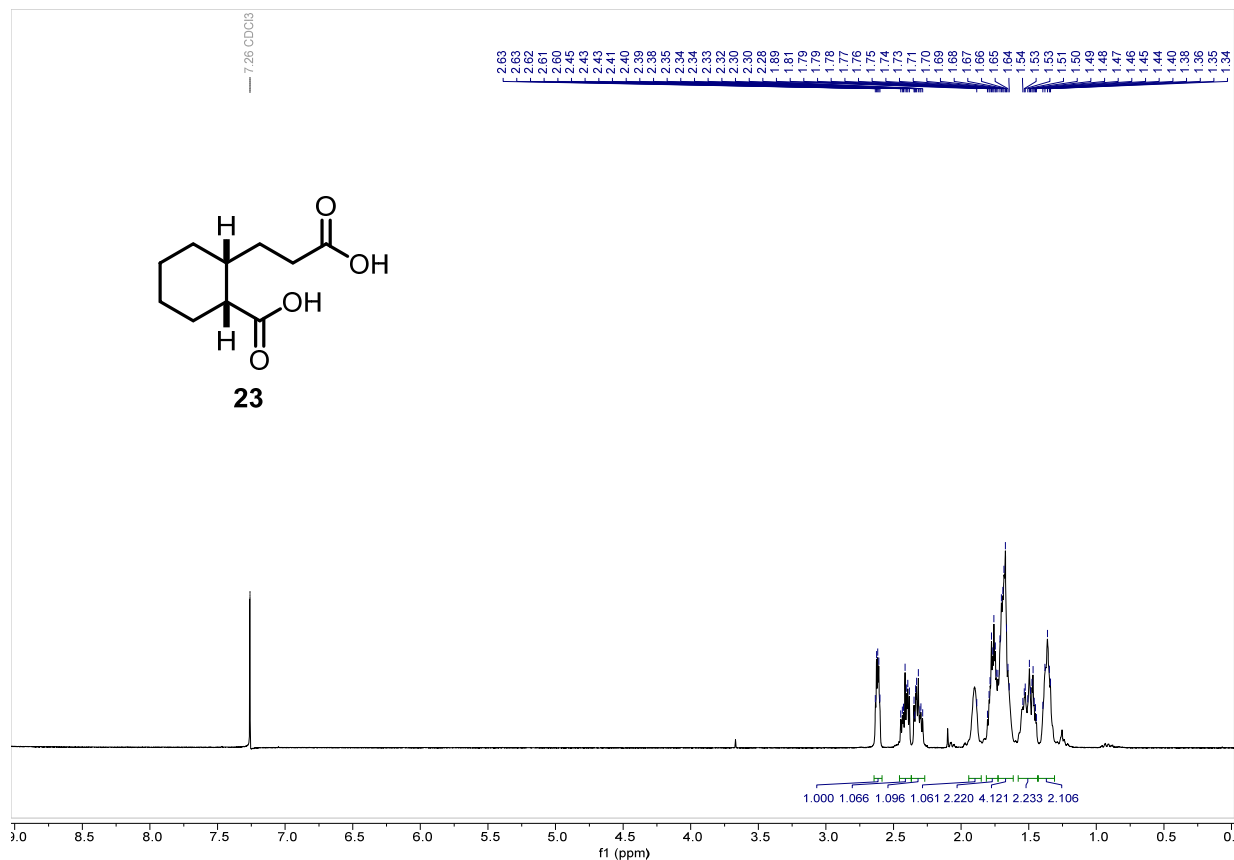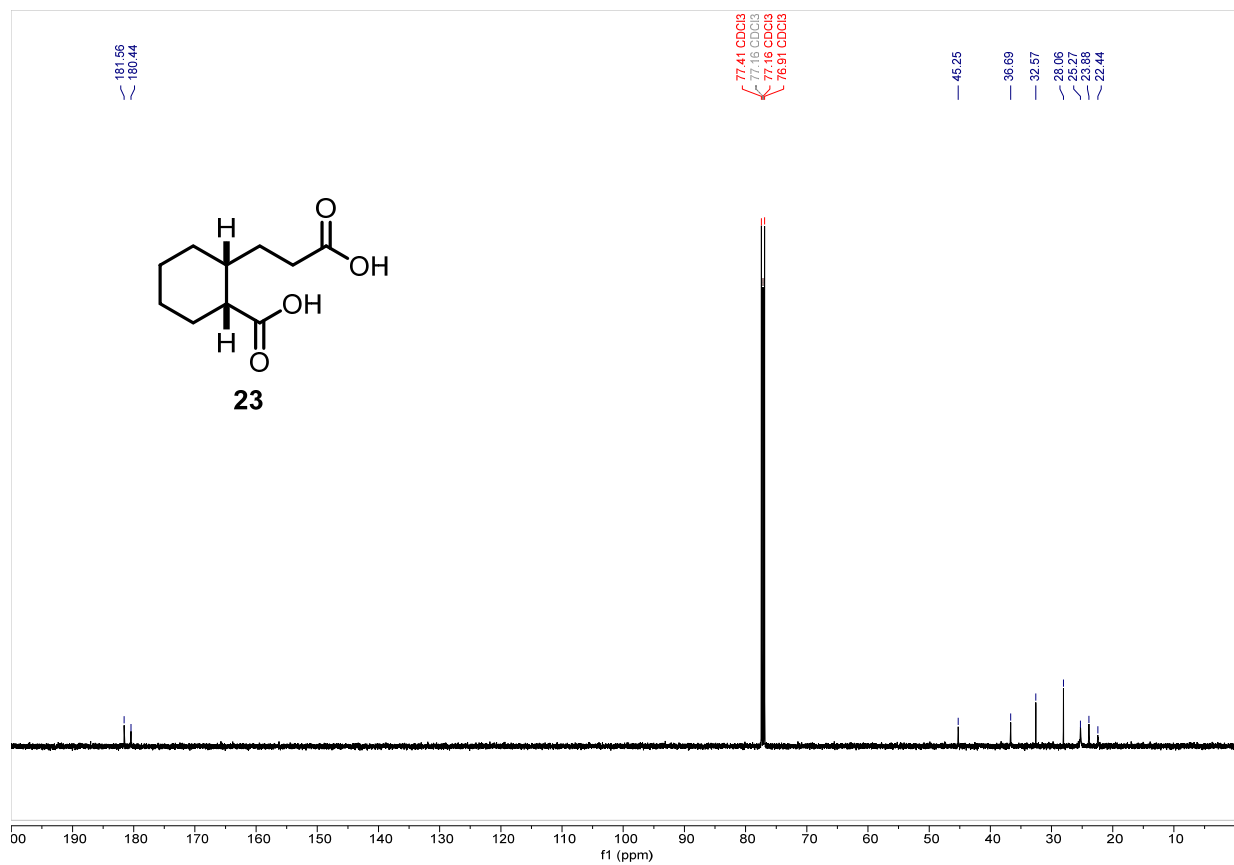

**(1*R*\*,2*S*\*)-2-(2-Carboxyethyl)cyclohexane-1-carboxylic acid 24**

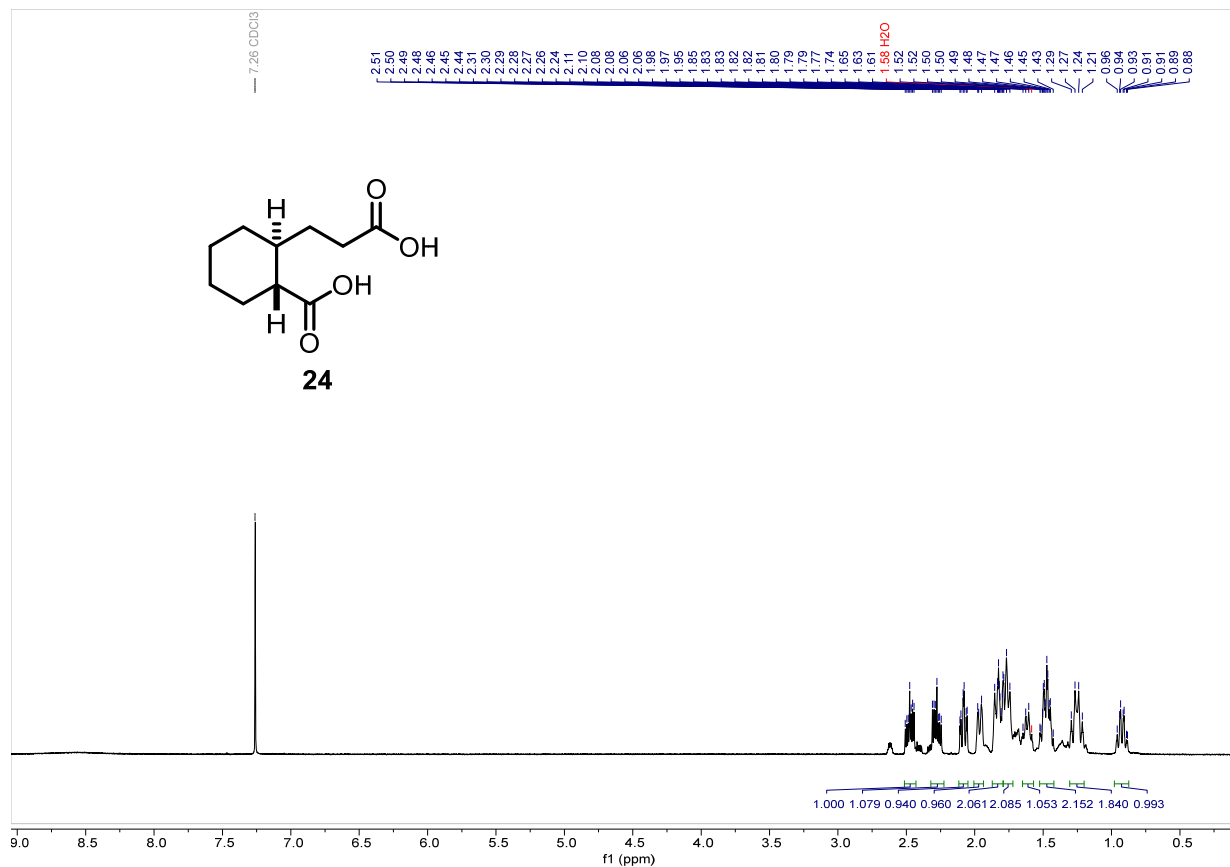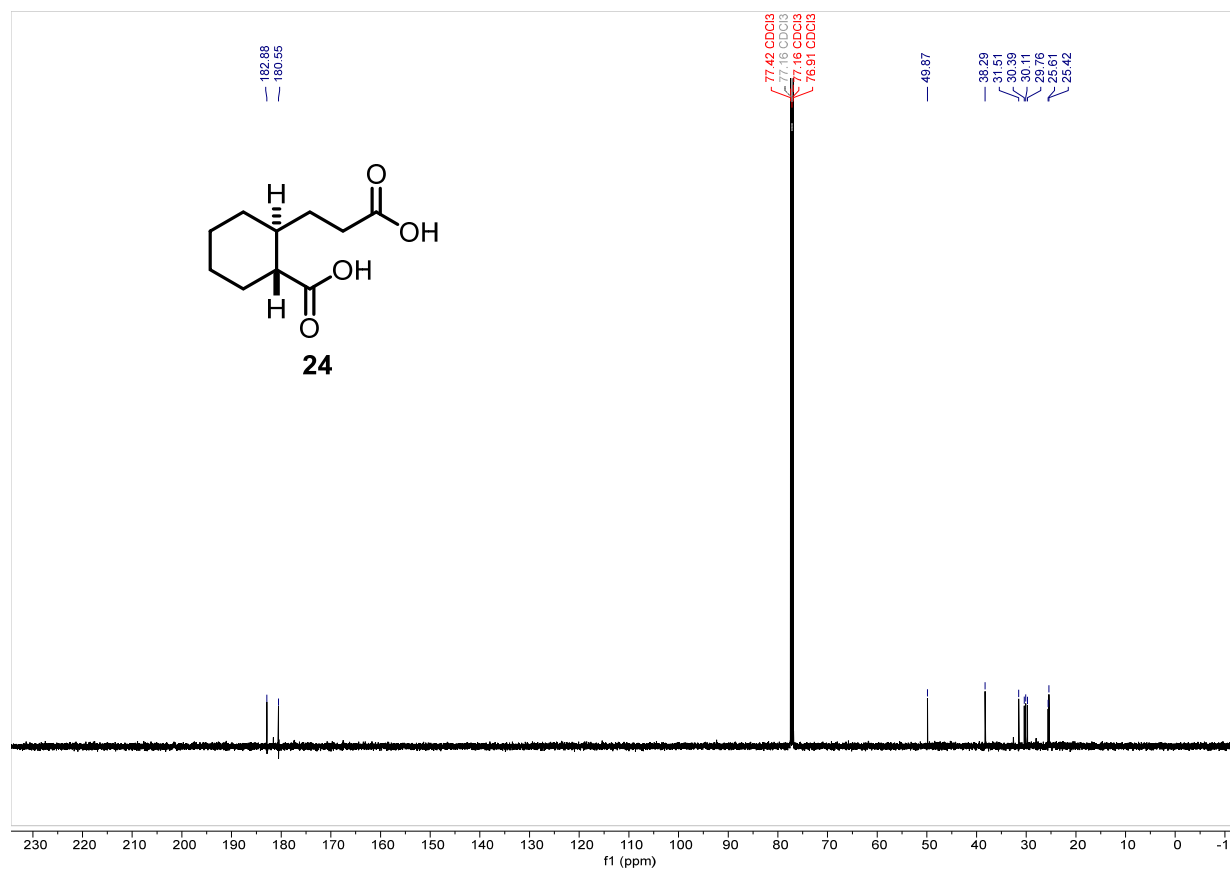



**(1*R*\*,3*S*\*)-3-(Carboxymethyl)cyclopentane-1-carboxylic acid 25**

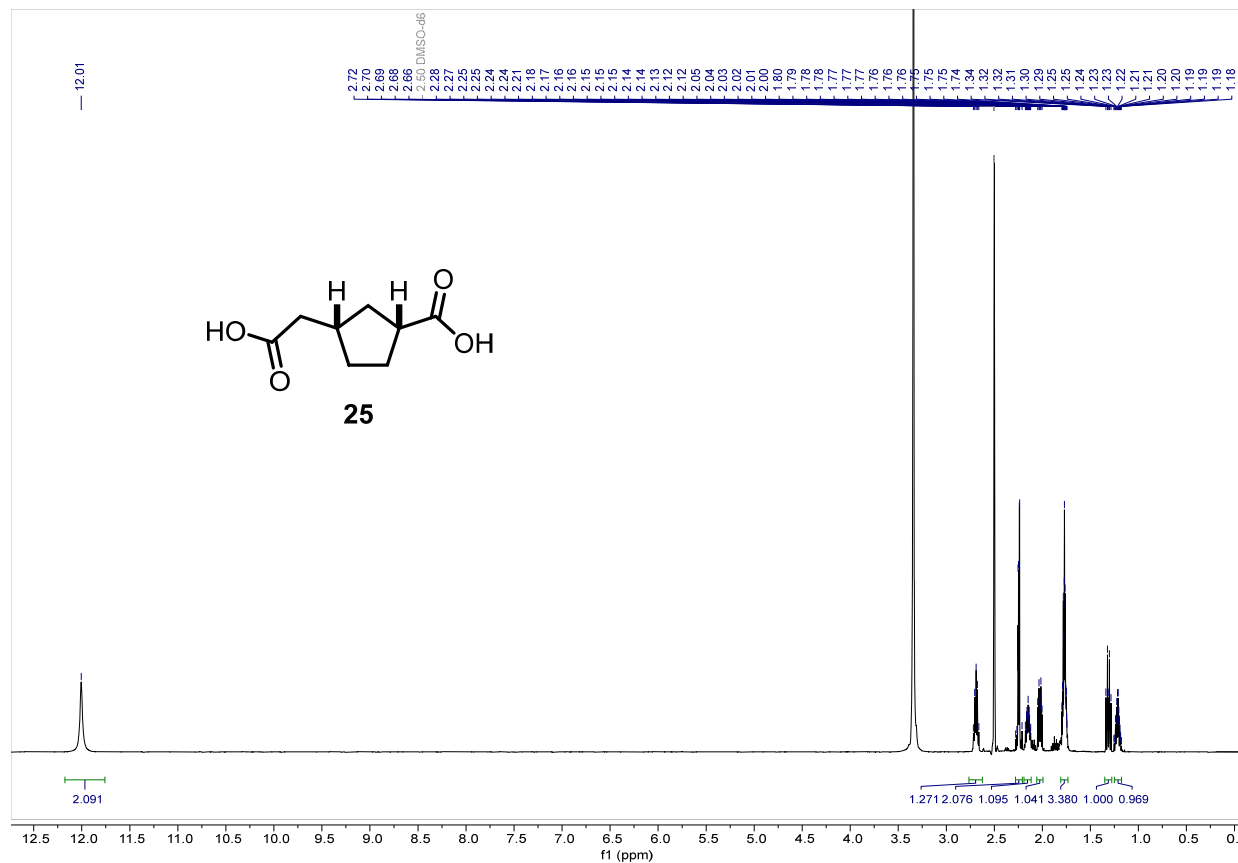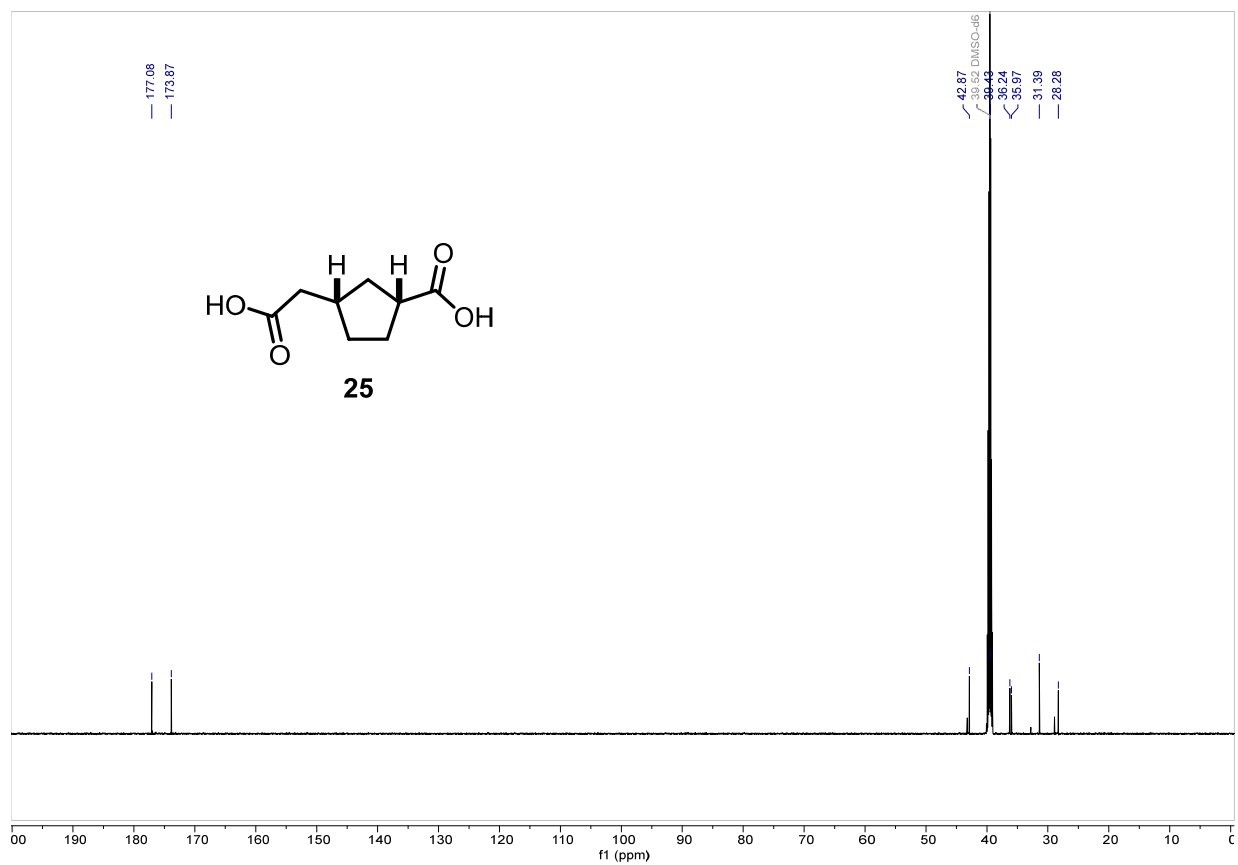

# Benzyl 2-(4-(benzyloxy)-4-oxobutyl)benzoate S32

yjm-Y2-65-1-p-0103.1.fid

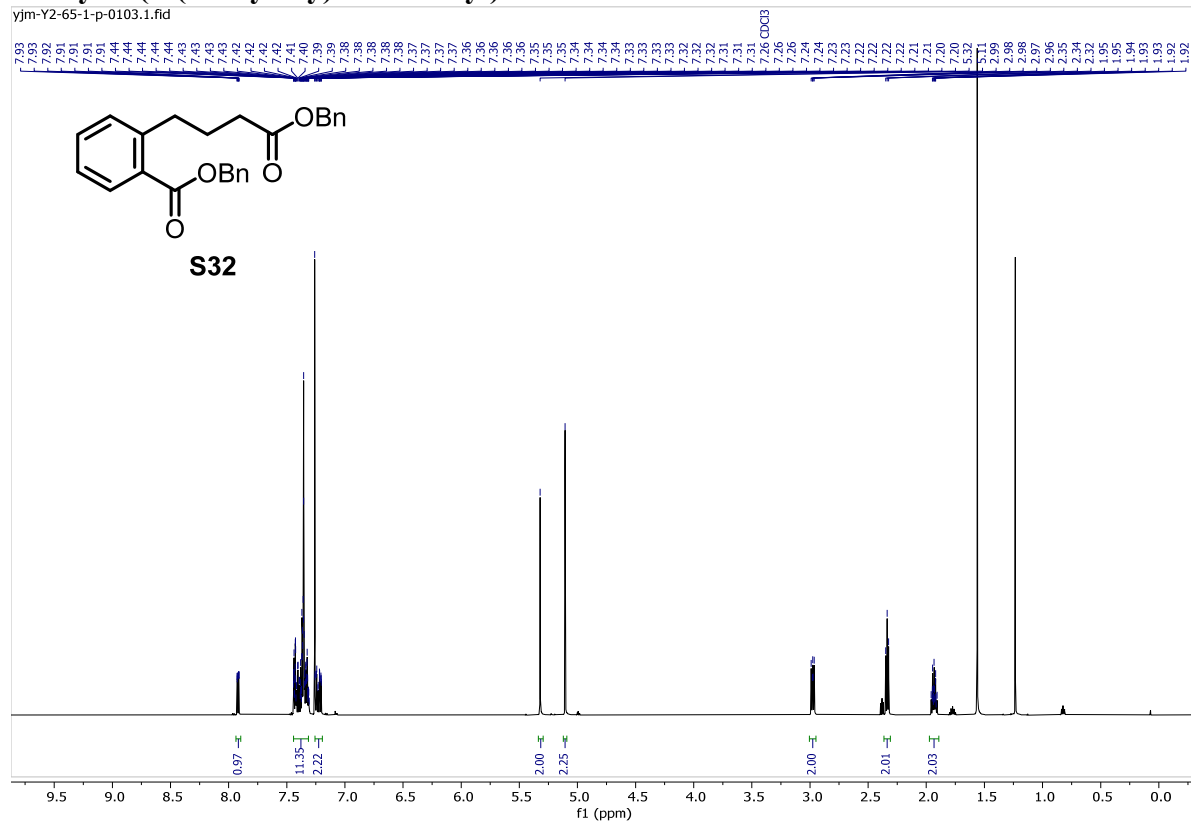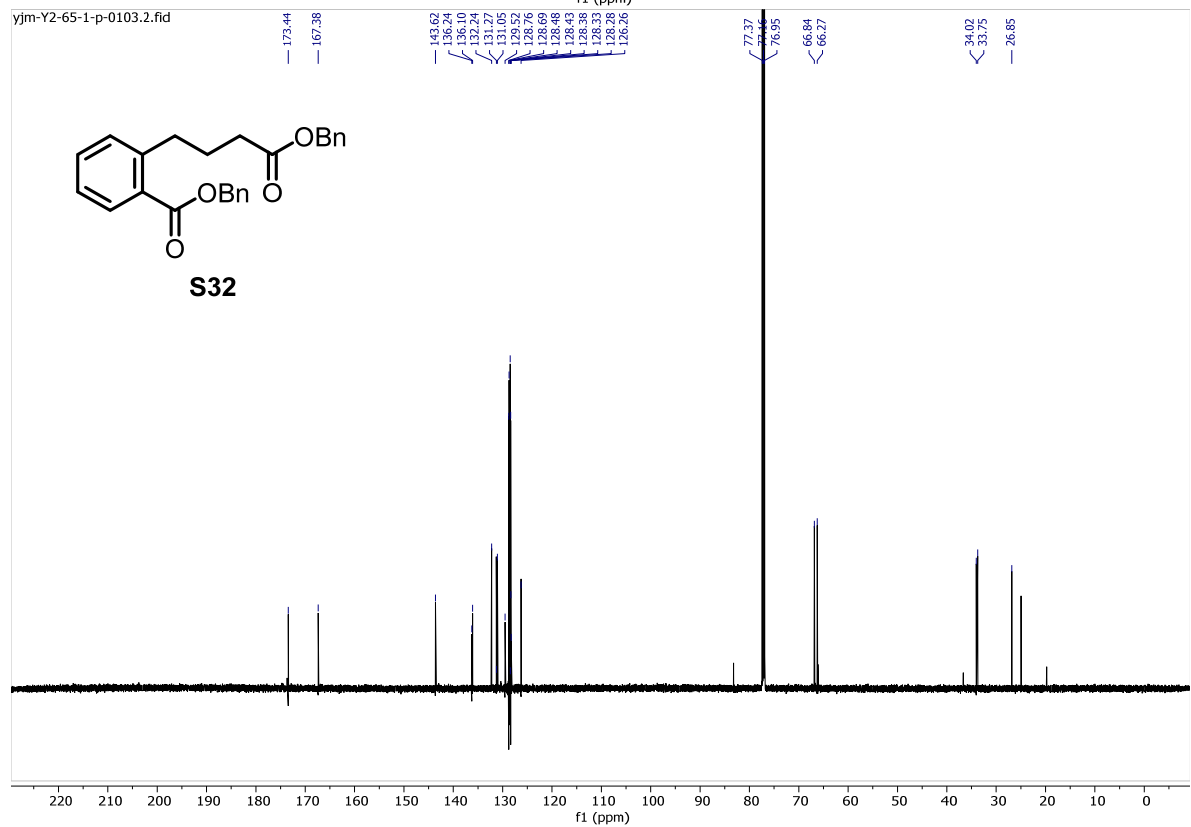

# 2-(3-Carboxypropyl)benzoic acid 32

yjm-Y2-61-2-p.1.fid

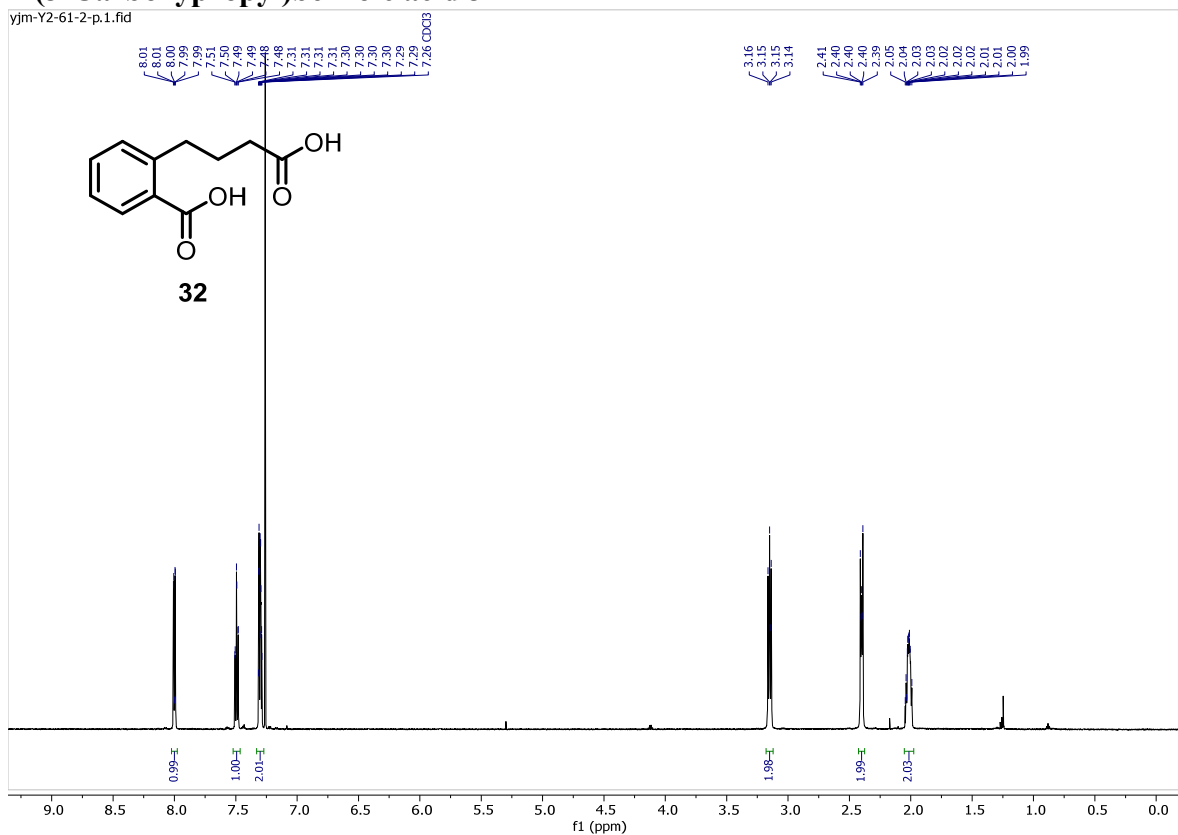

yjm-Y2-61-2-p.2.fid

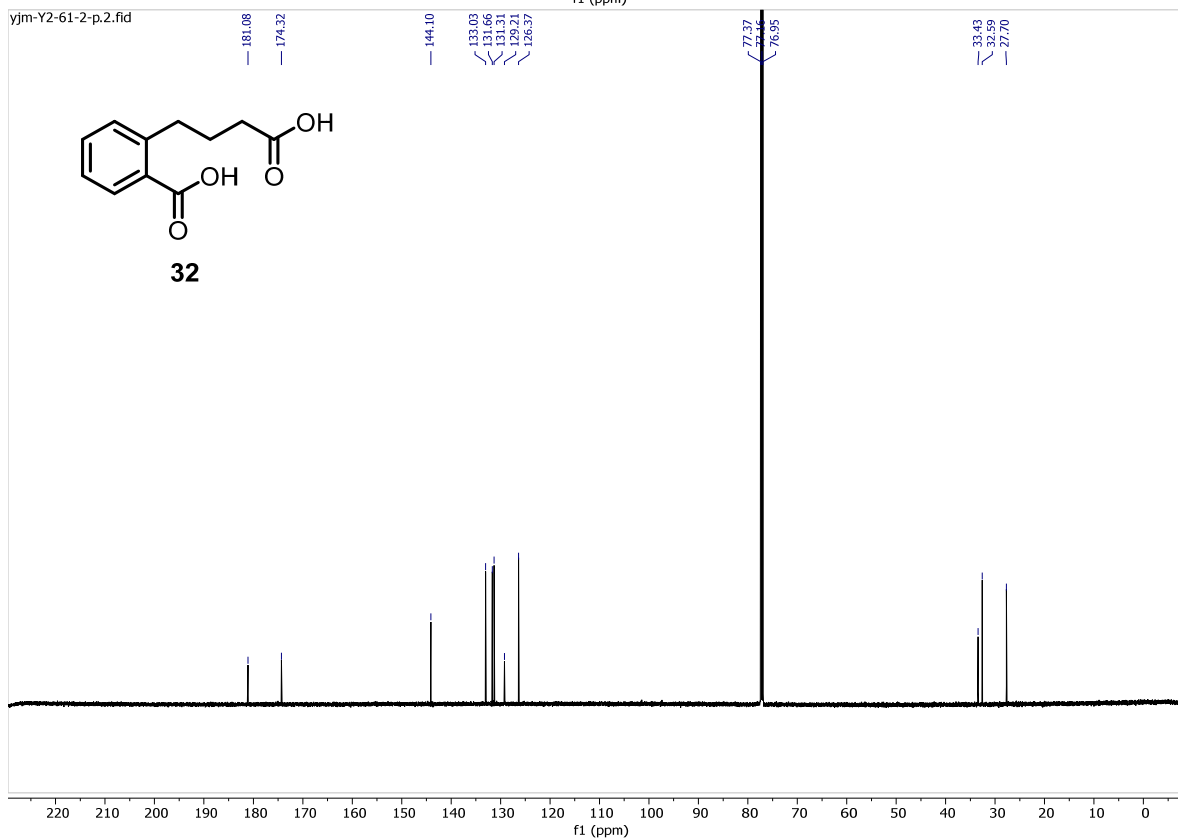

# Benzyl 6-(4-(benzyloxy)-4-oxobutyl)benzo[d][1,3]dioxole-5-carboxylate S33

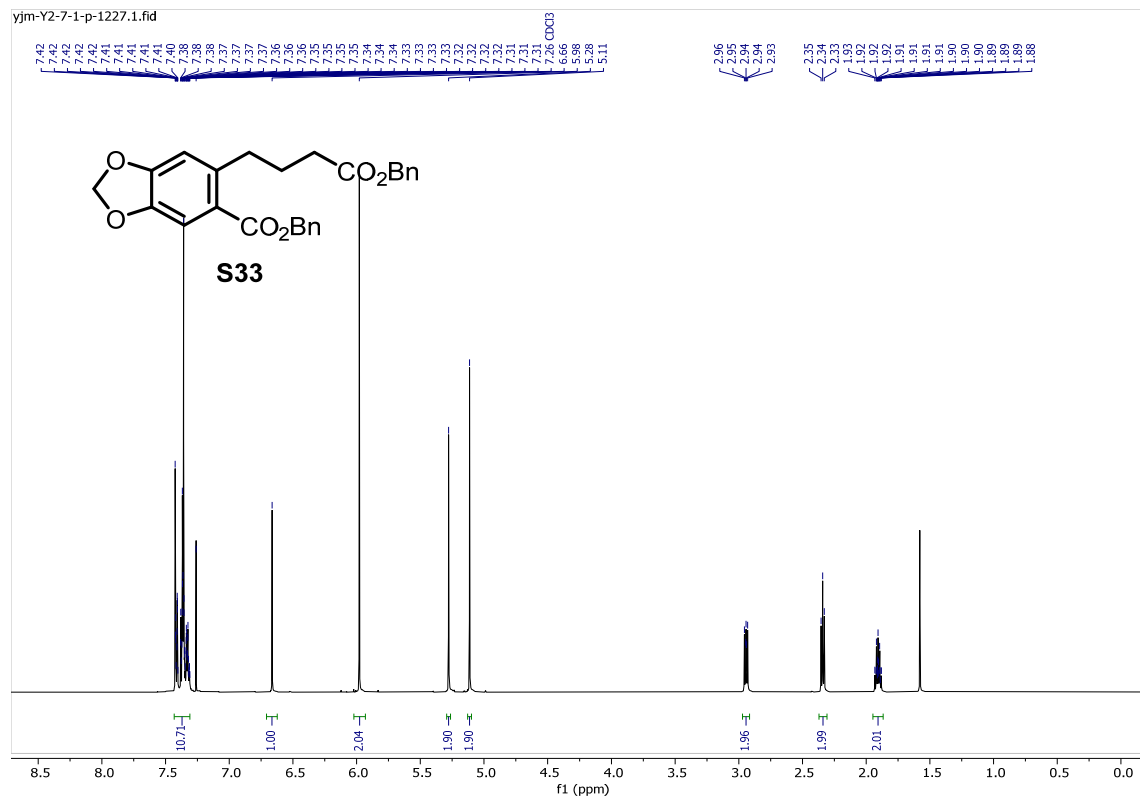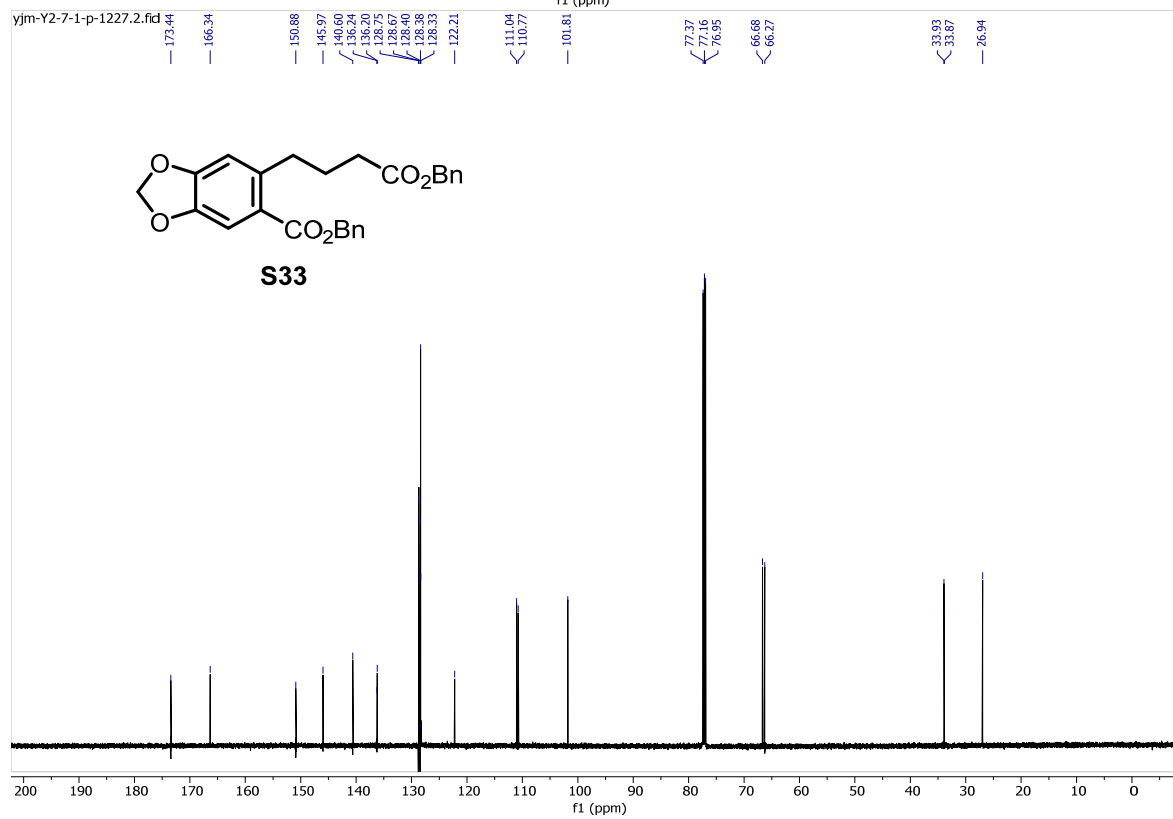

# 6-(3-Carboxypropyl)benzo[d][1,3]dioxole-5-carboxylic acid 33

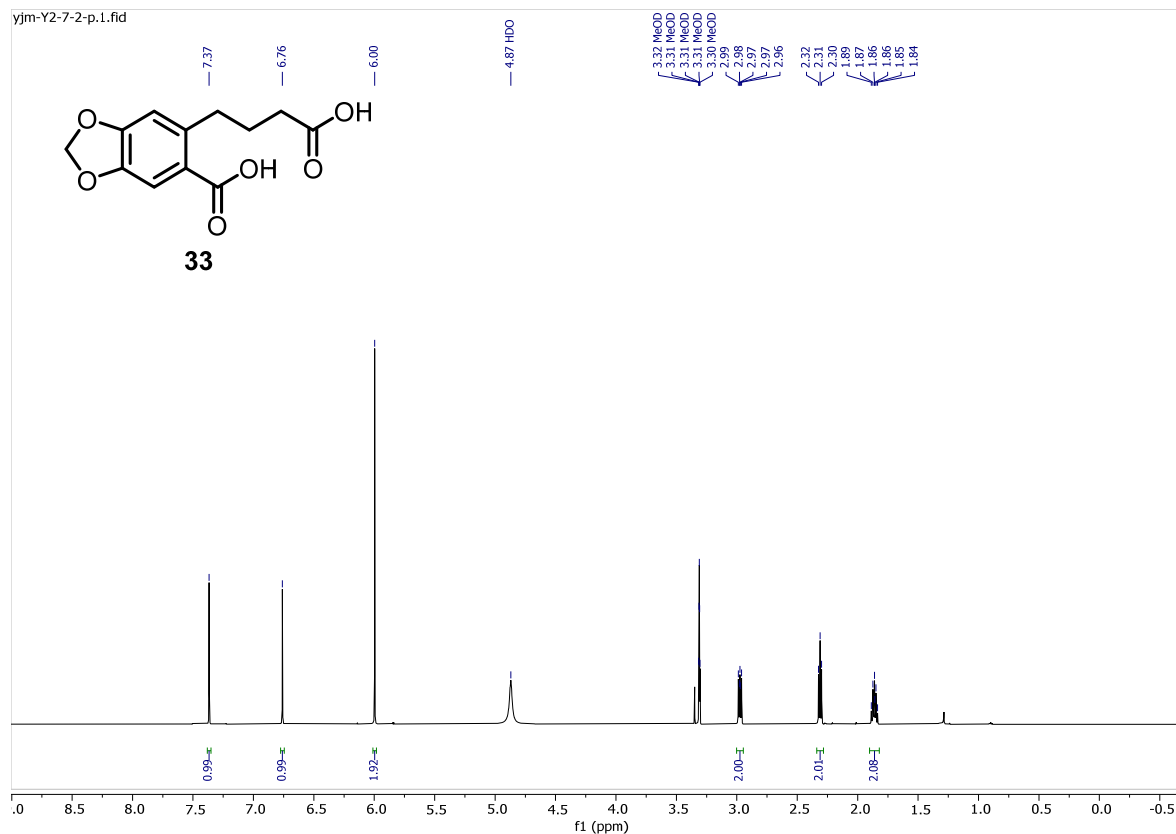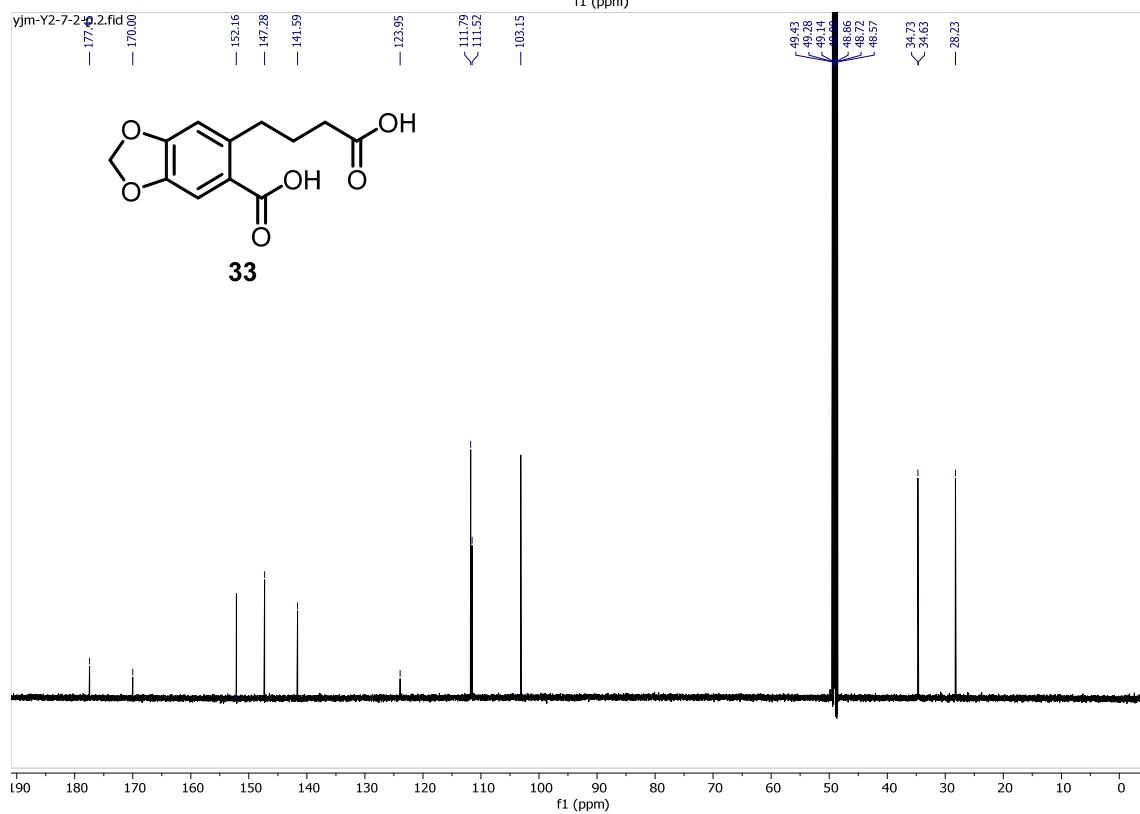

# Benzyl 2-(4-(benzyloxy)-4-oxobutyl)-4,5-dimethoxybenzoate S34

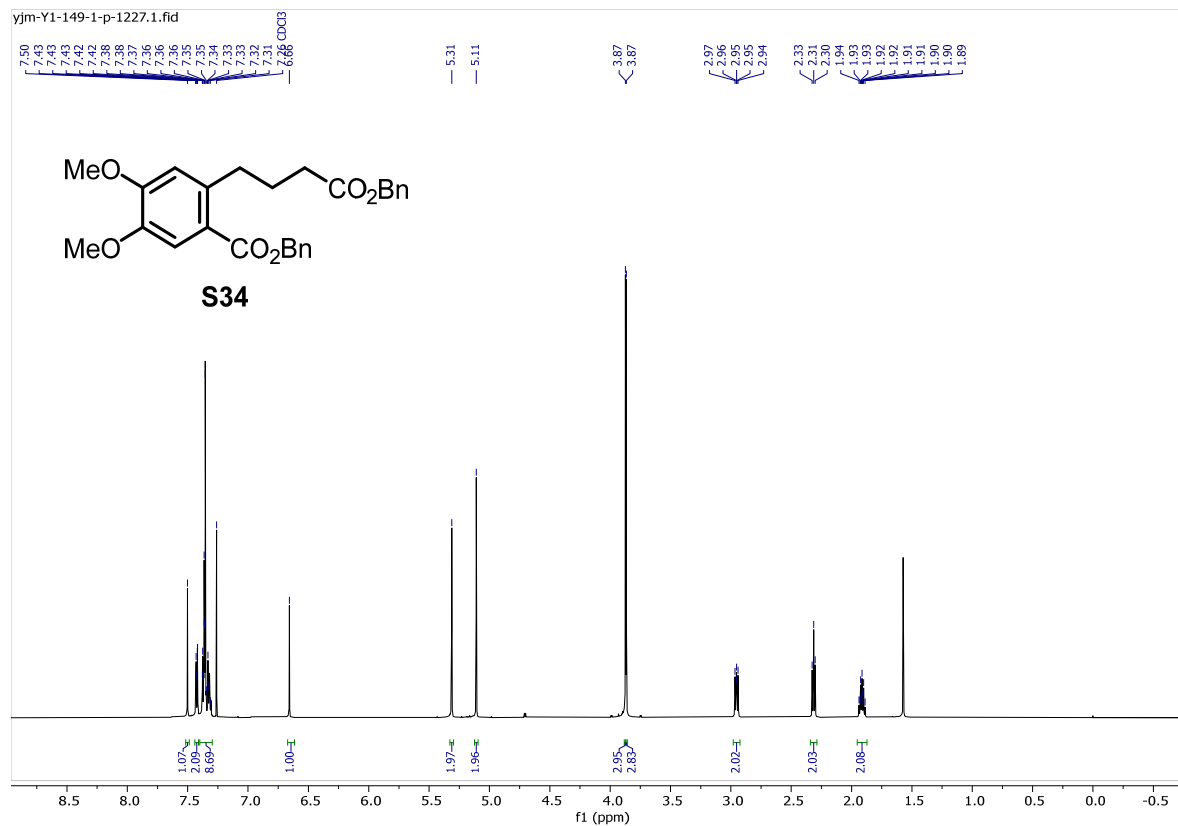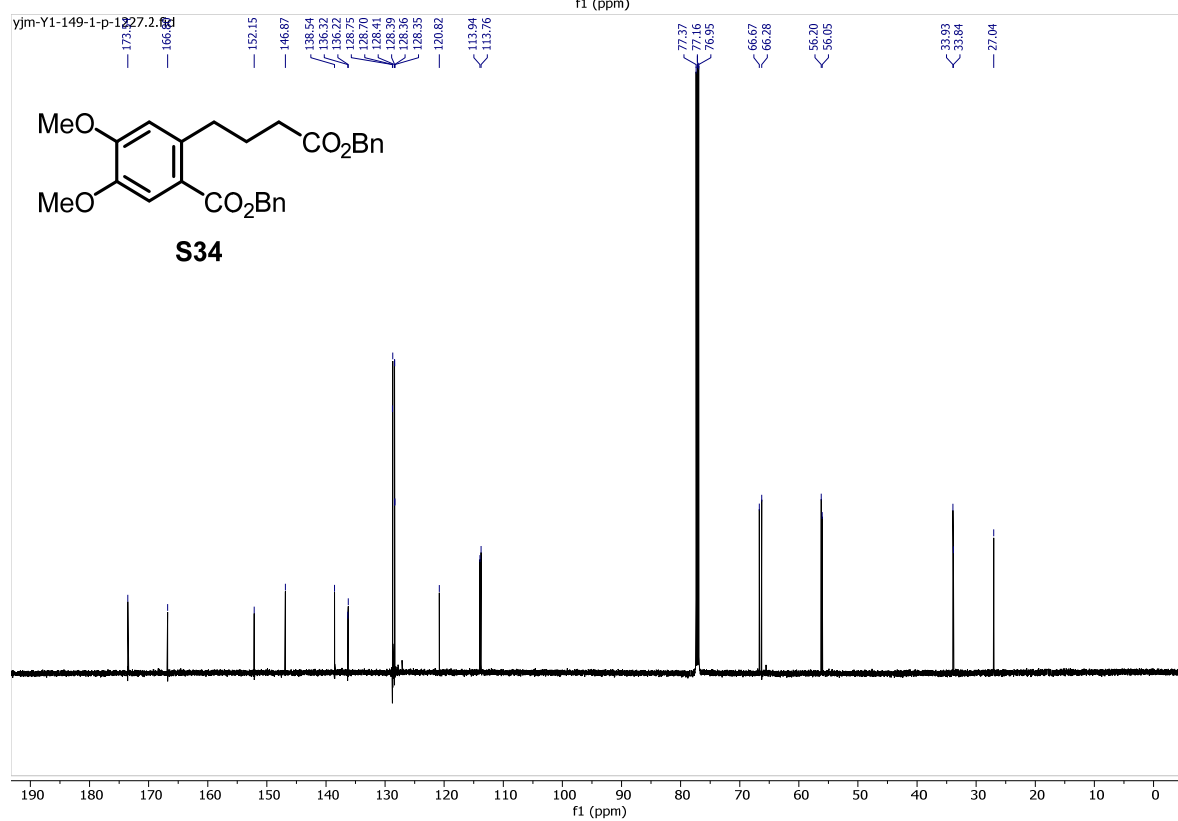

## 2-(3-Carboxypropyl)-4,5-dimethoxybenzoic acid **34**

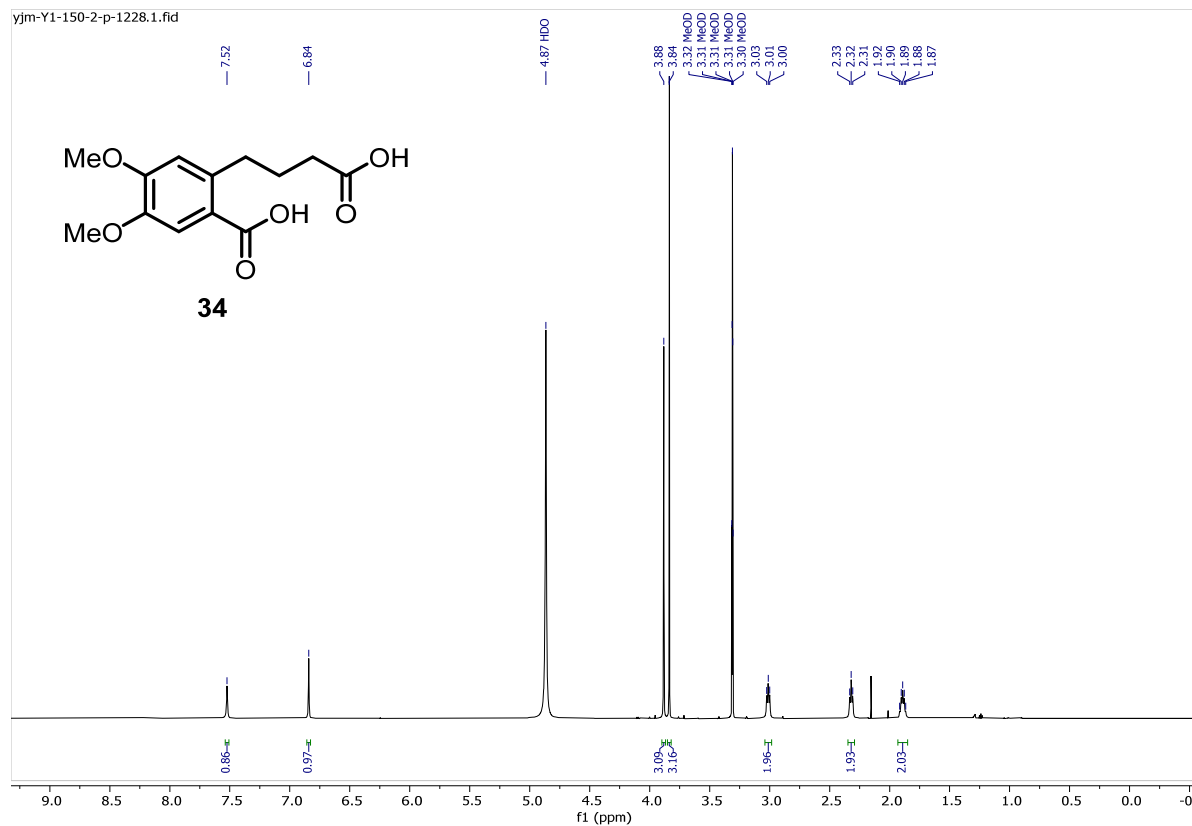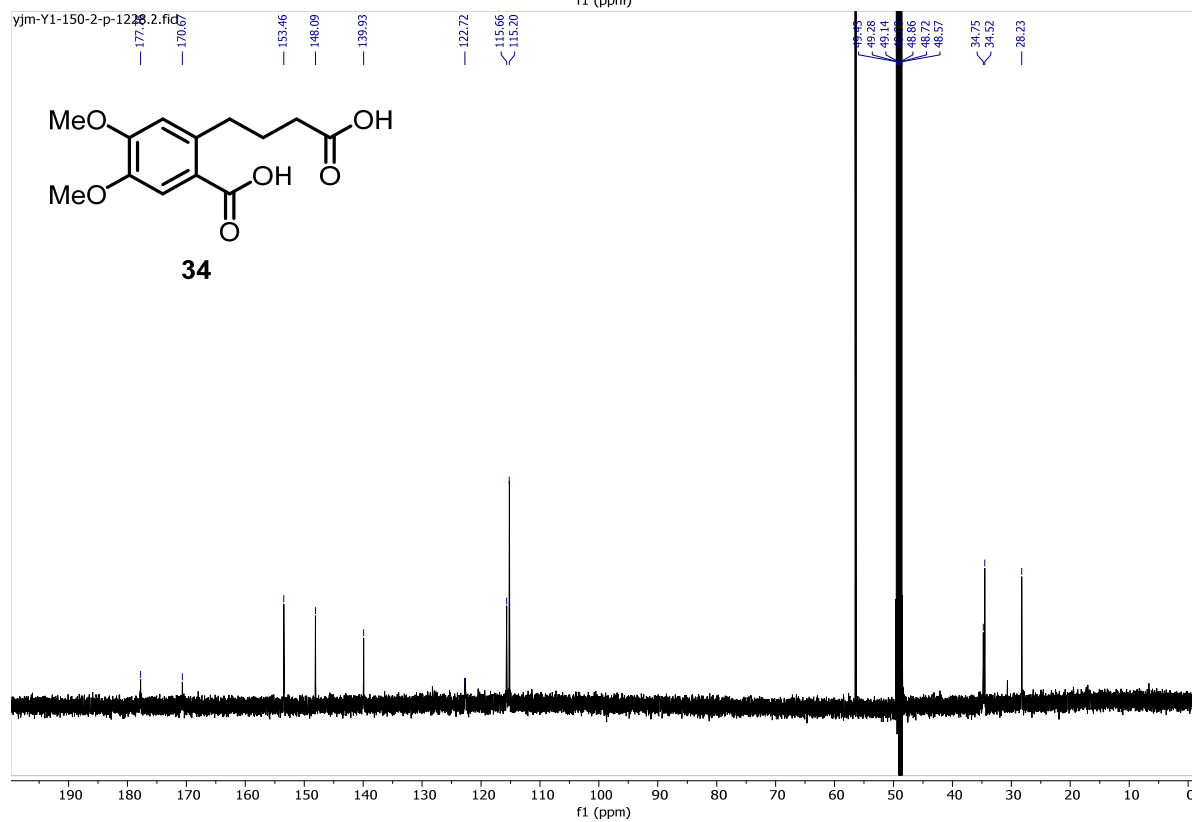

# Benzyl 2-(4-(benzyloxy)-4-oxobutyl)-4-methoxybenzoate S35

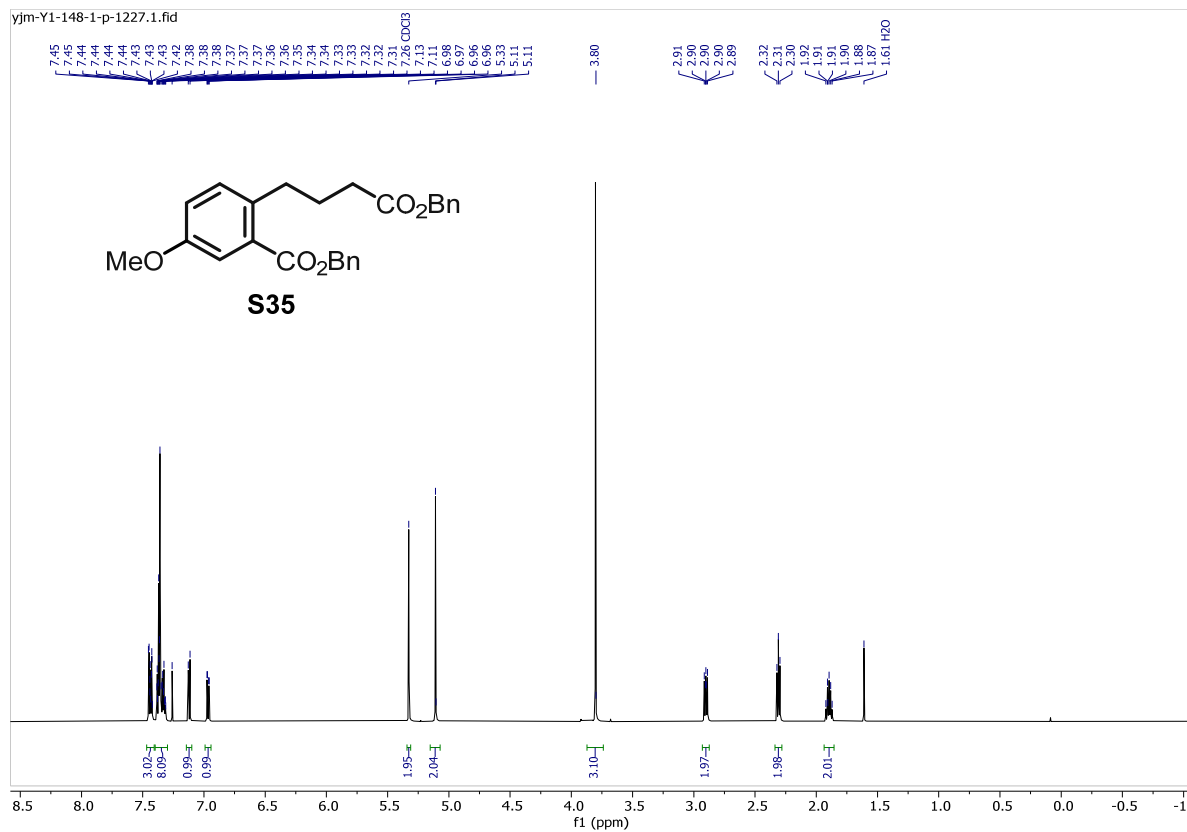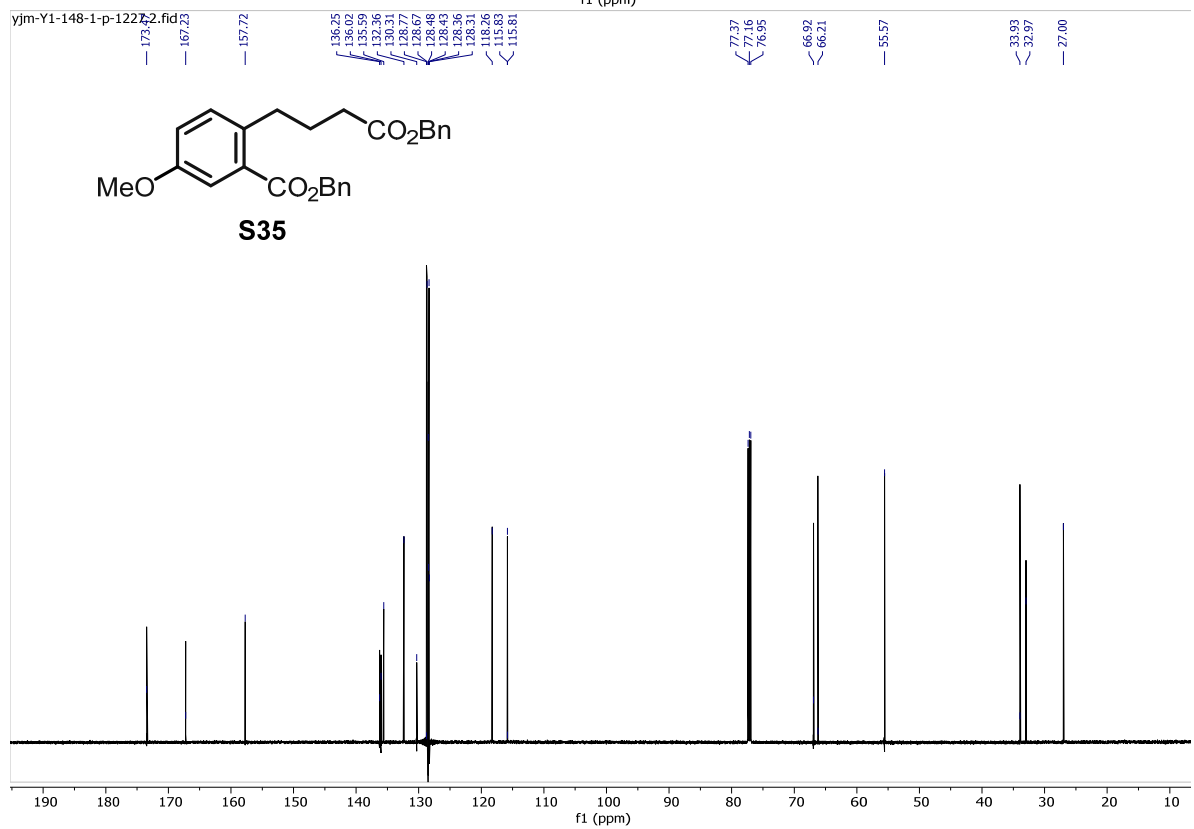



## 2-(3-Carboxypropyl)-5-methoxybenzoic acid 35

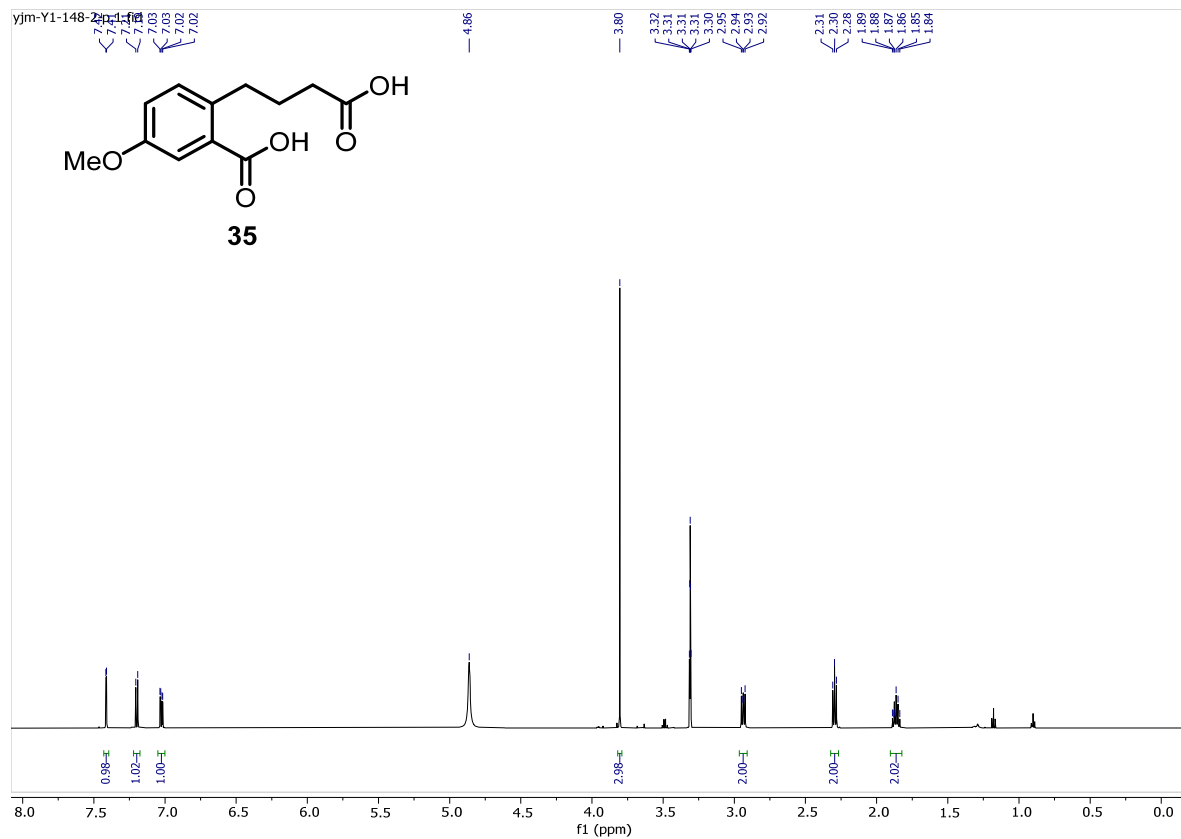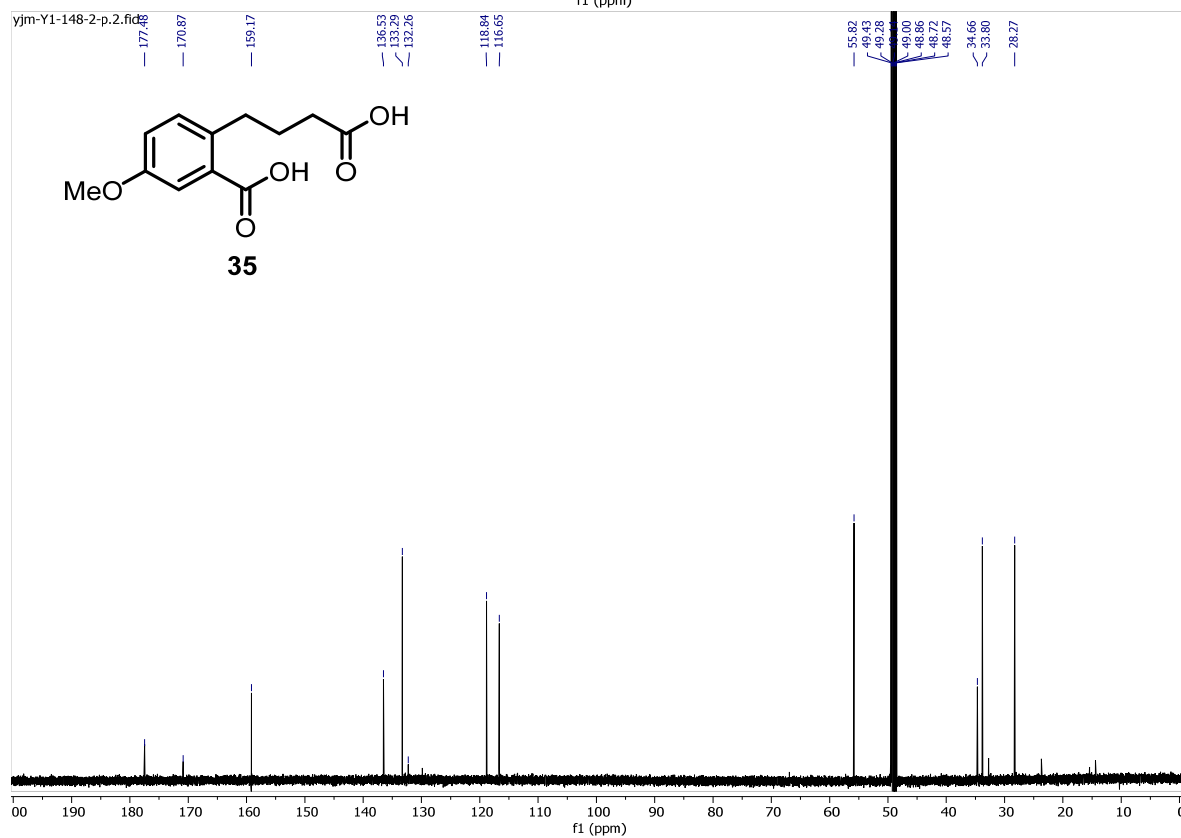

## 2-Bromo-4-(2,5-dioxopyrrolidin-1-yl)benzoic acid SS4

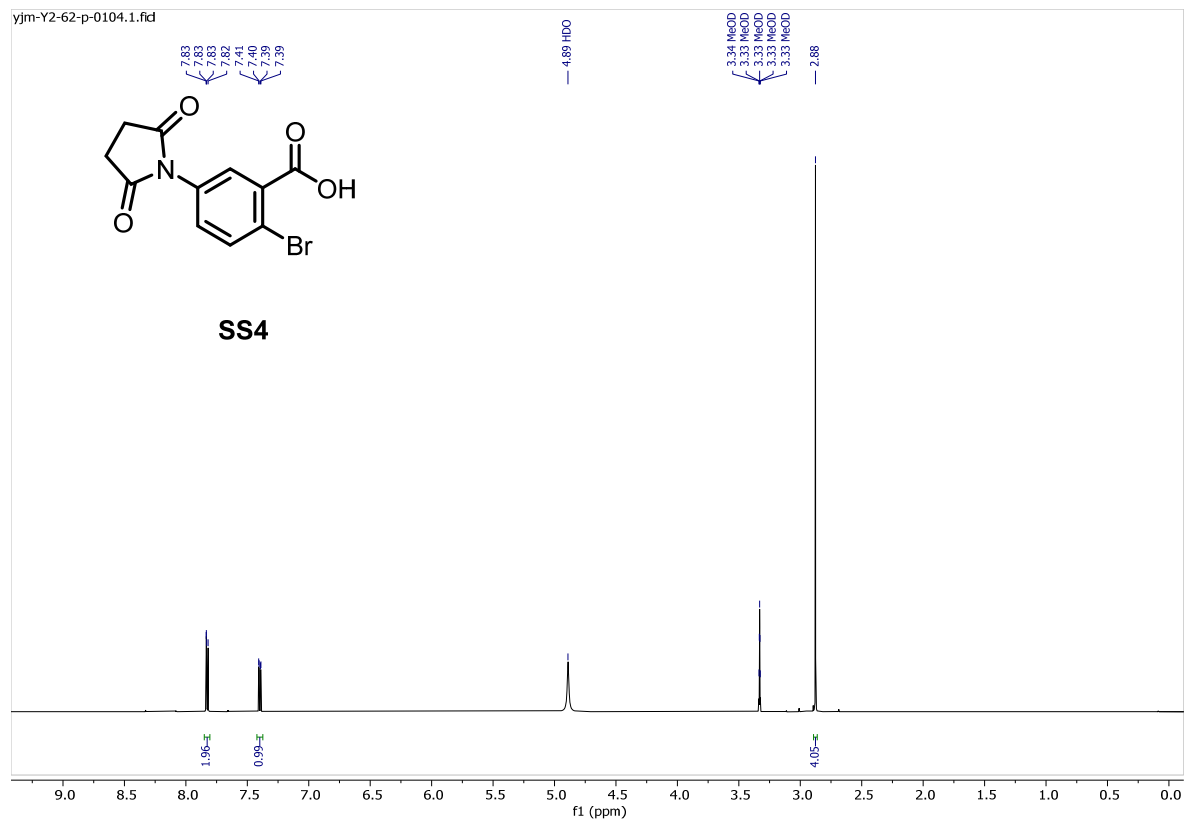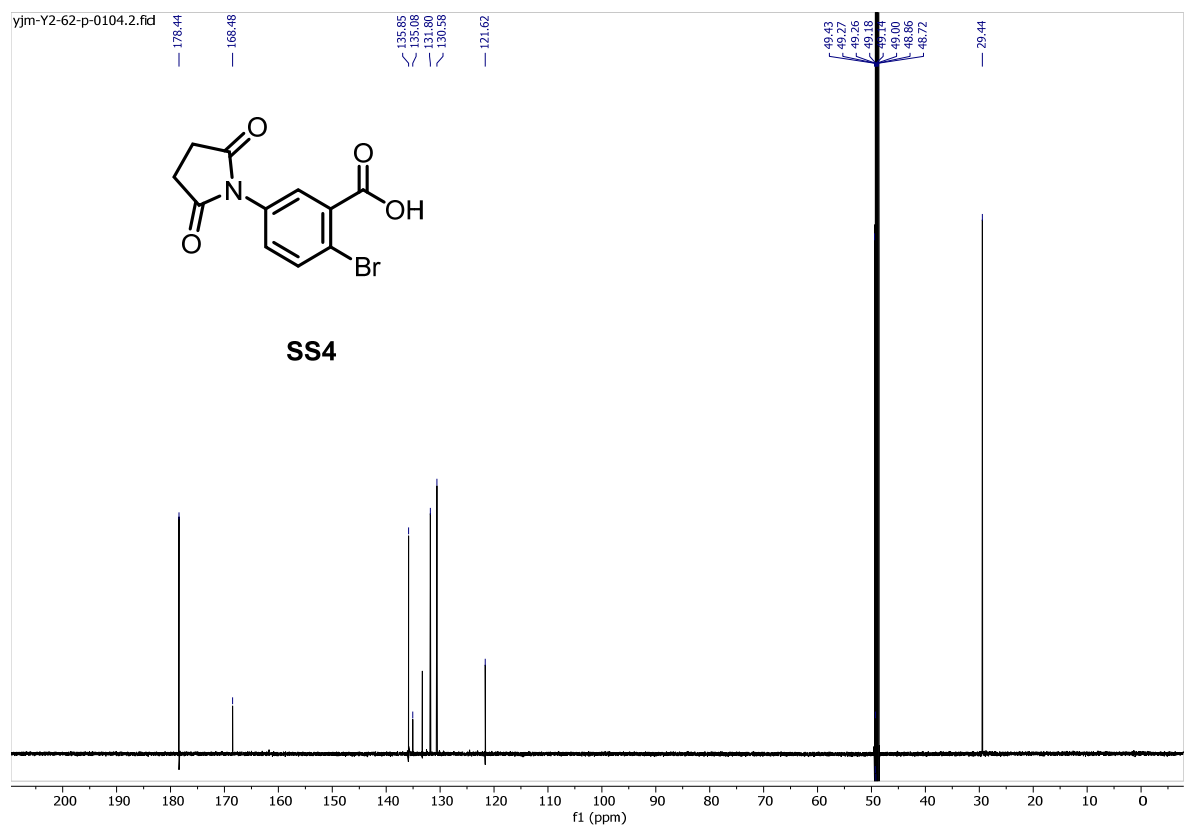

# Benzyl 2-(4-(benzyloxy)-4-oxobutyl)-4-(2,5-dioxopyrrolidin-1-yl)benzoate S36

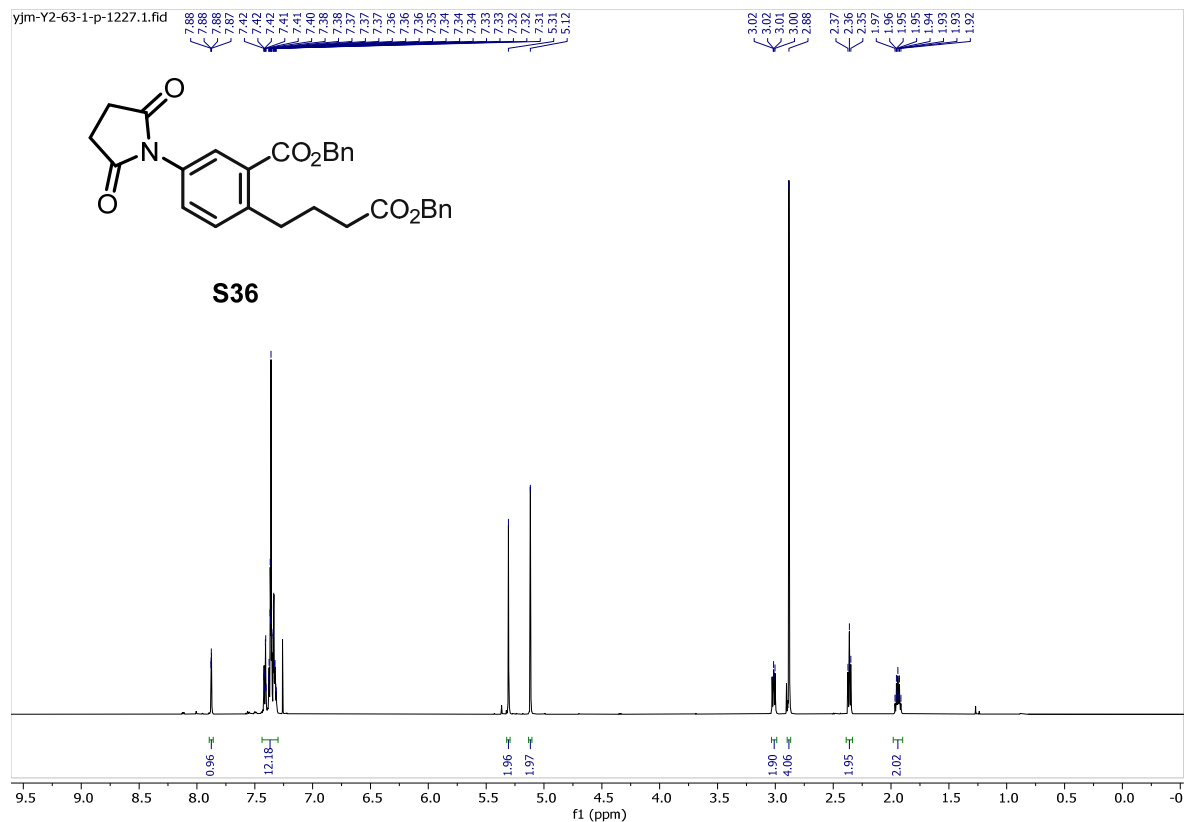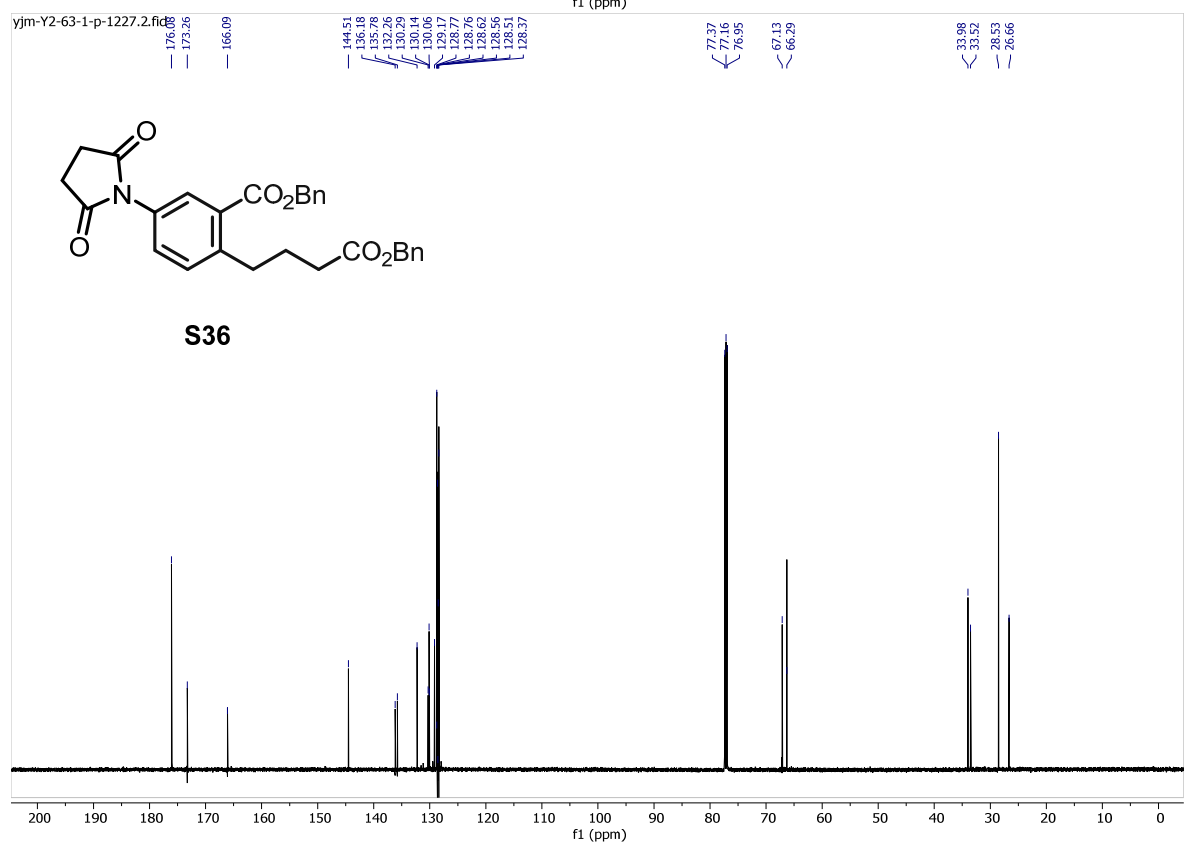

## 2-(3-Carboxypropyl)-4-(2,5-dioxypyrrolidin-1-yl)benzoic acid 36

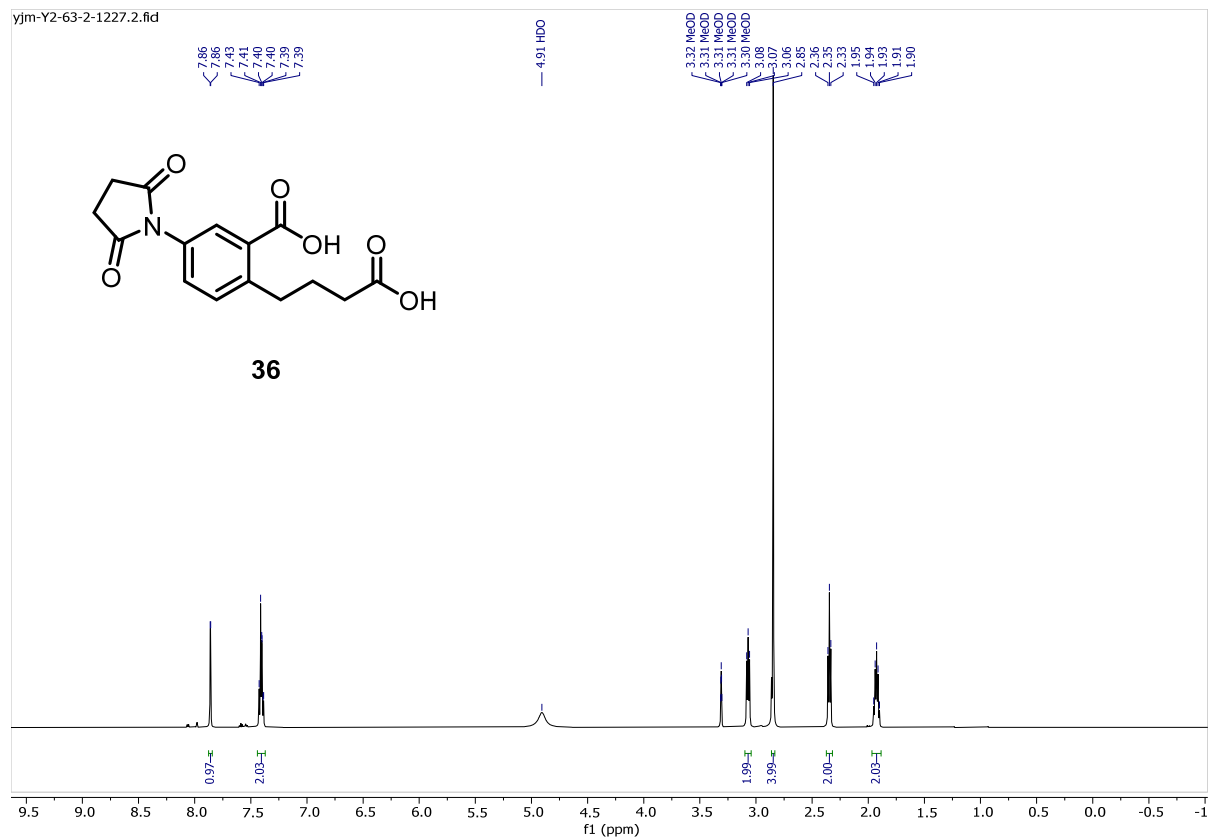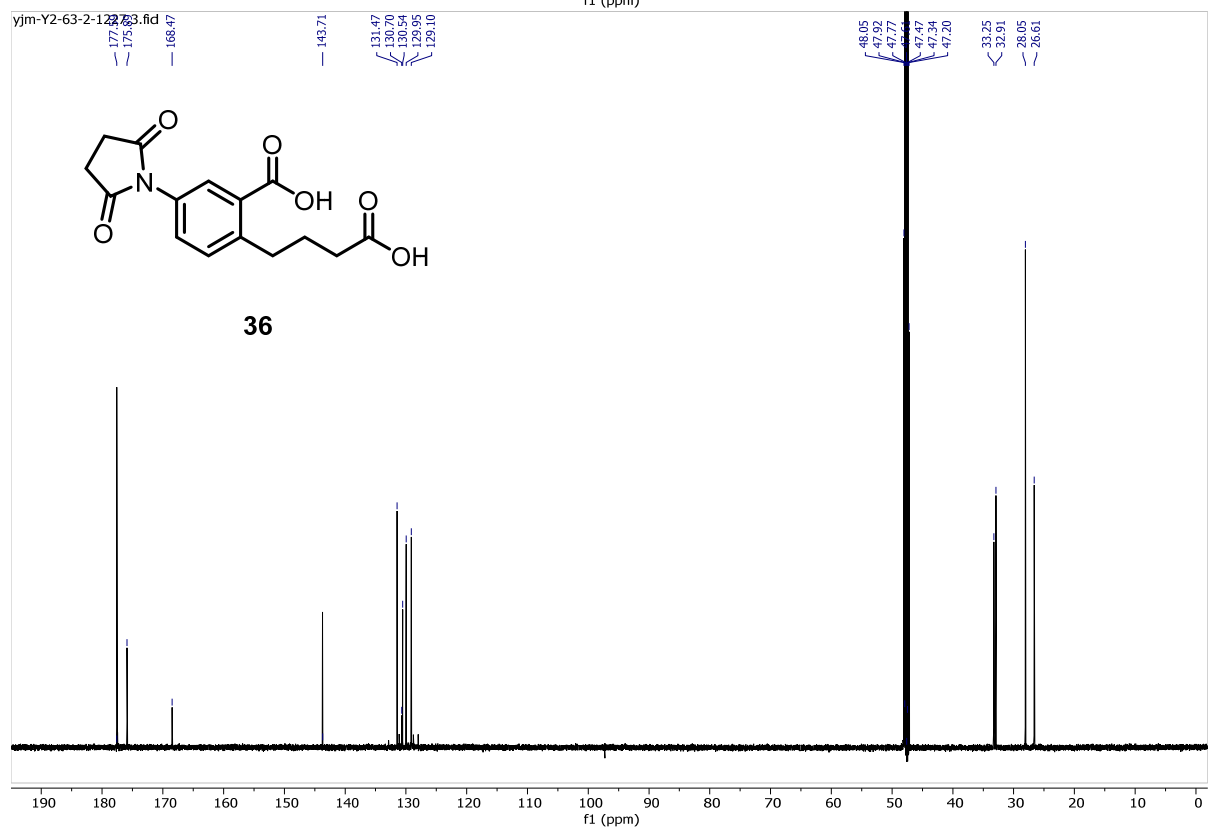

# Benzyl 2-(4-(benzyloxy)-4-oxobutyl)-3-methylbenzoate S37

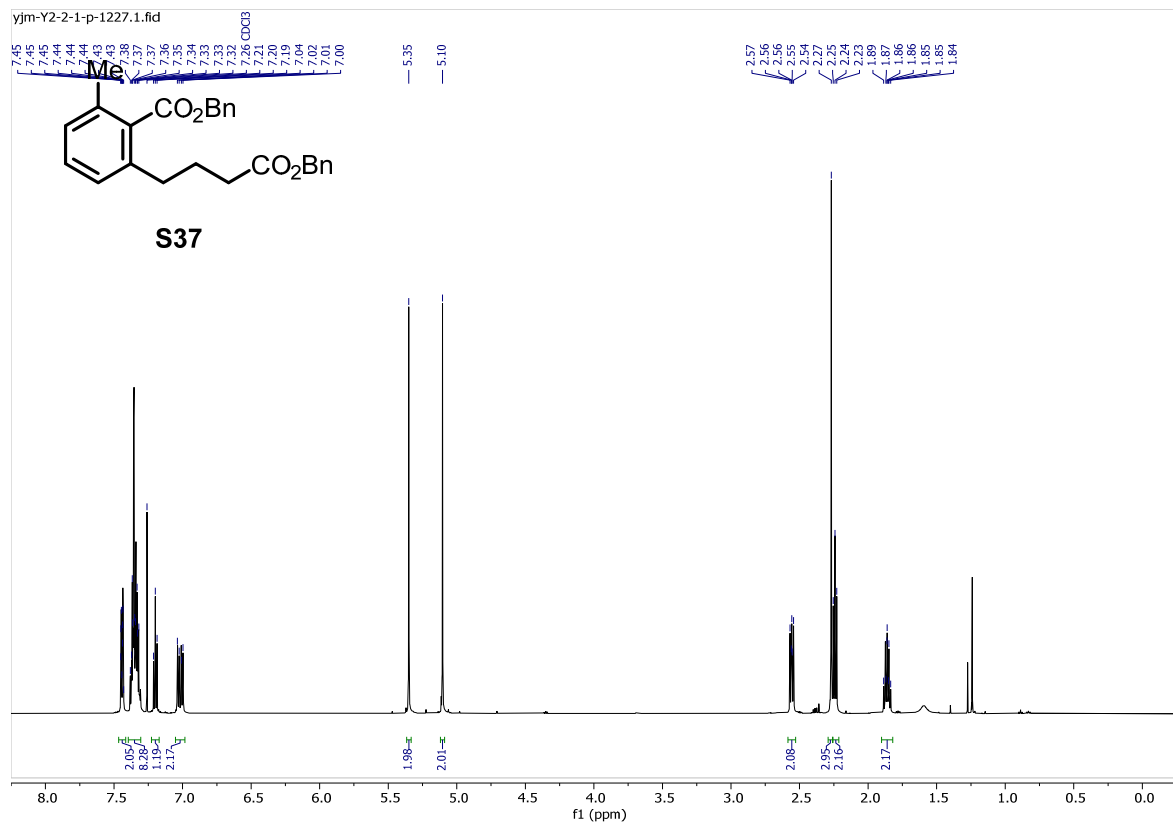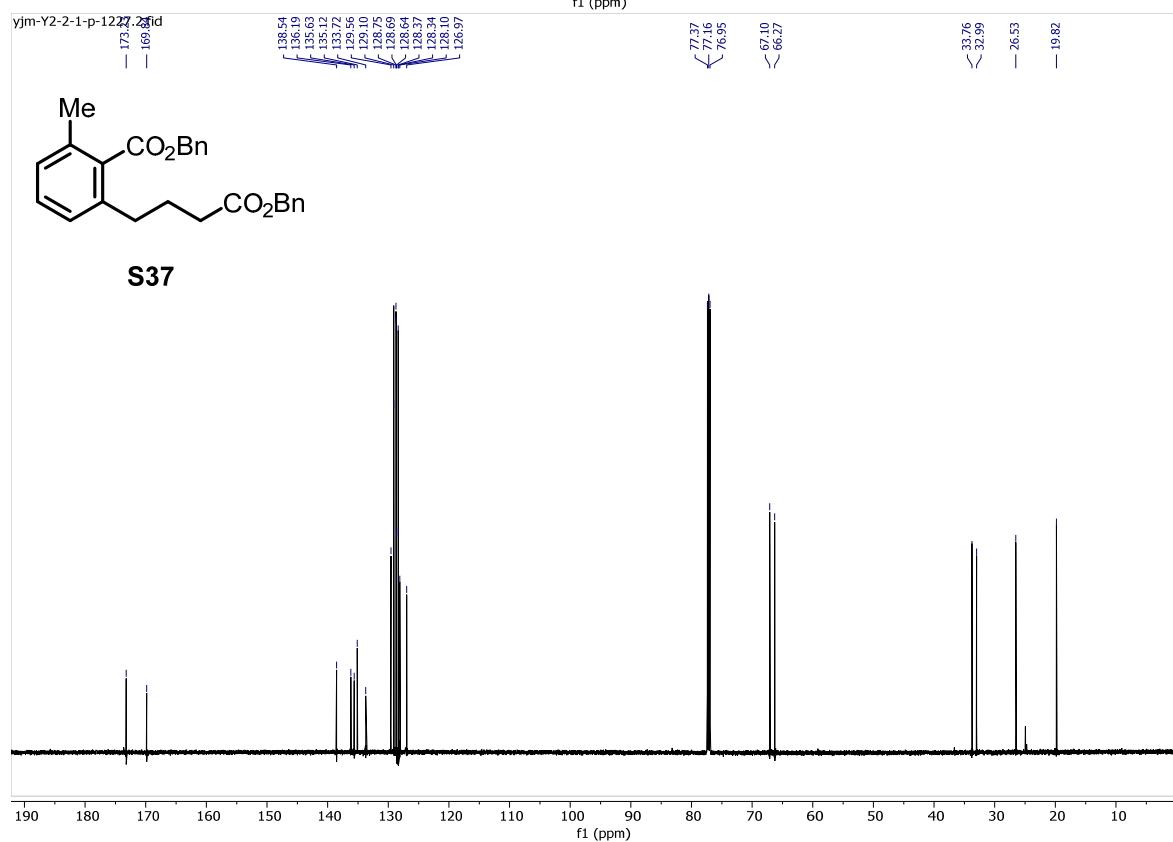

## 2-(3-Carboxypropyl)-6-methylbenzoic acid 37

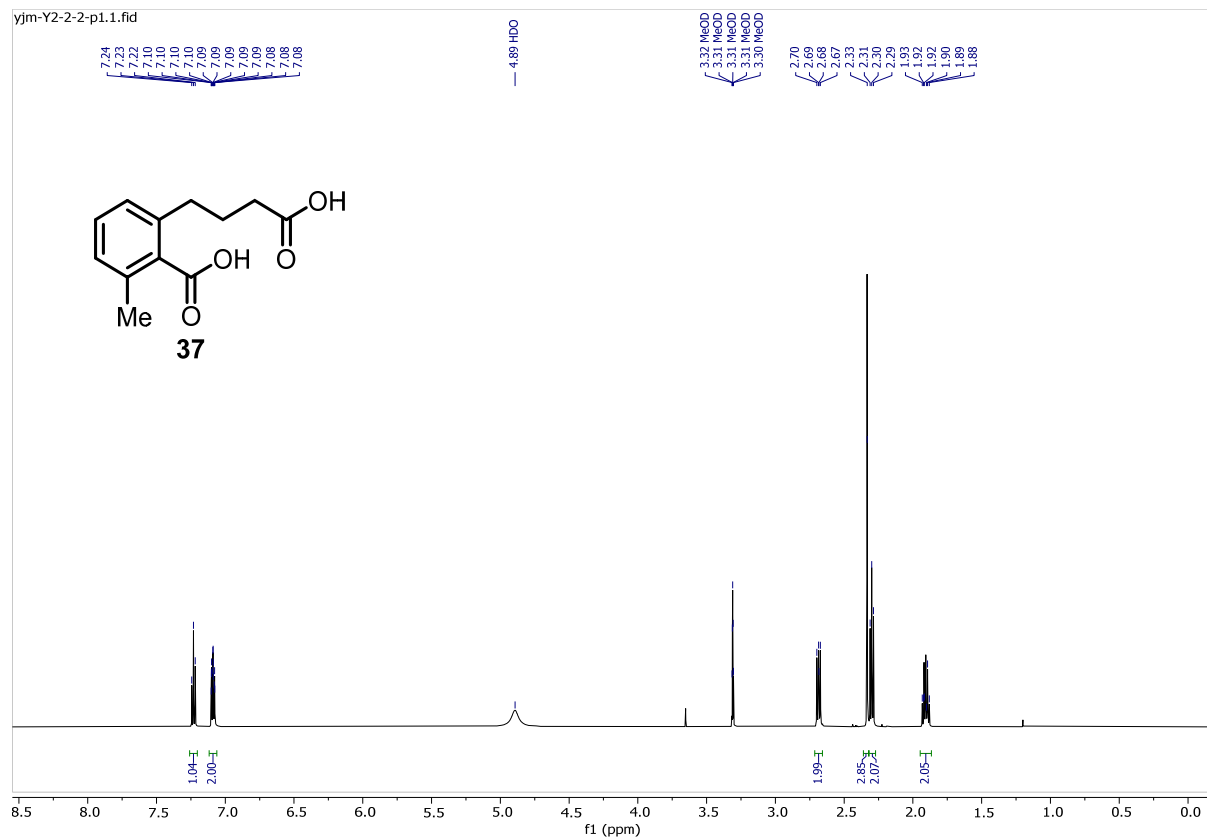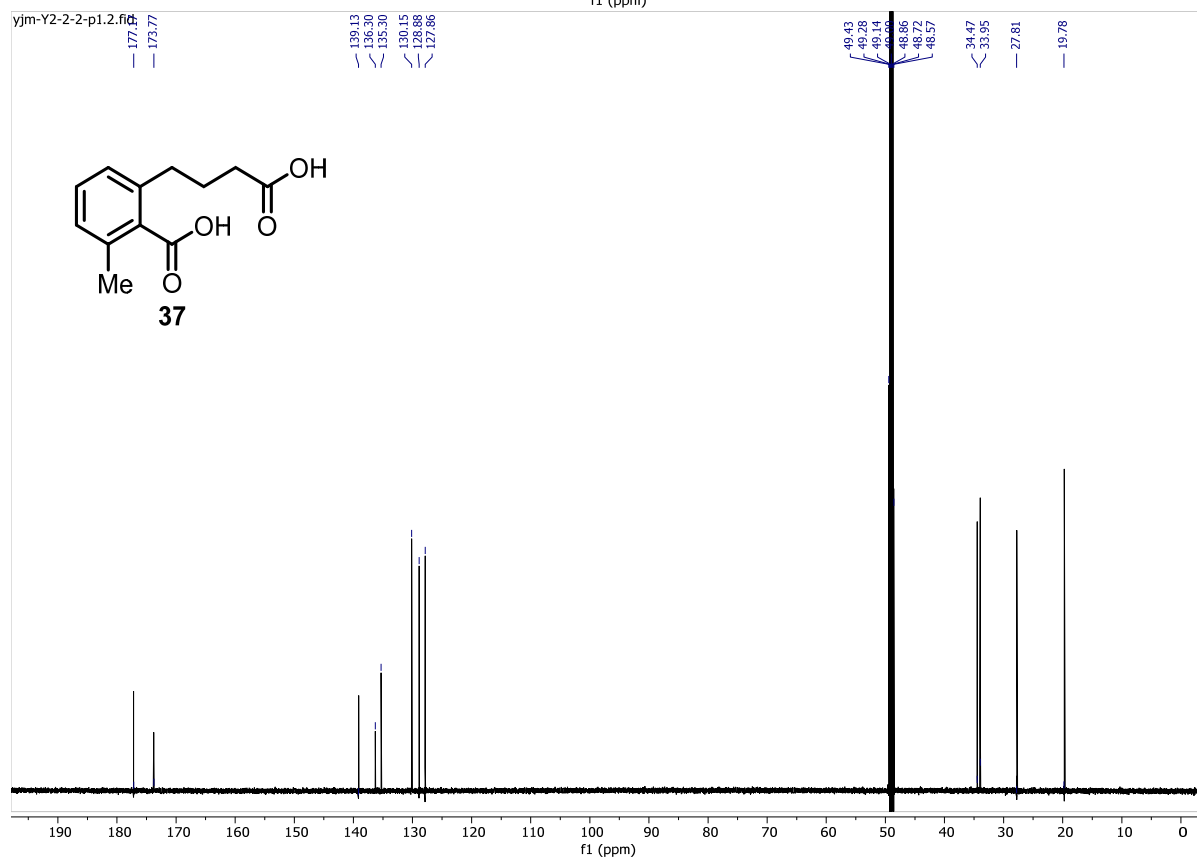

# Benzyl 2-(4-(benzyloxy)-4-oxobutyl)-4-methylbenzoate S38

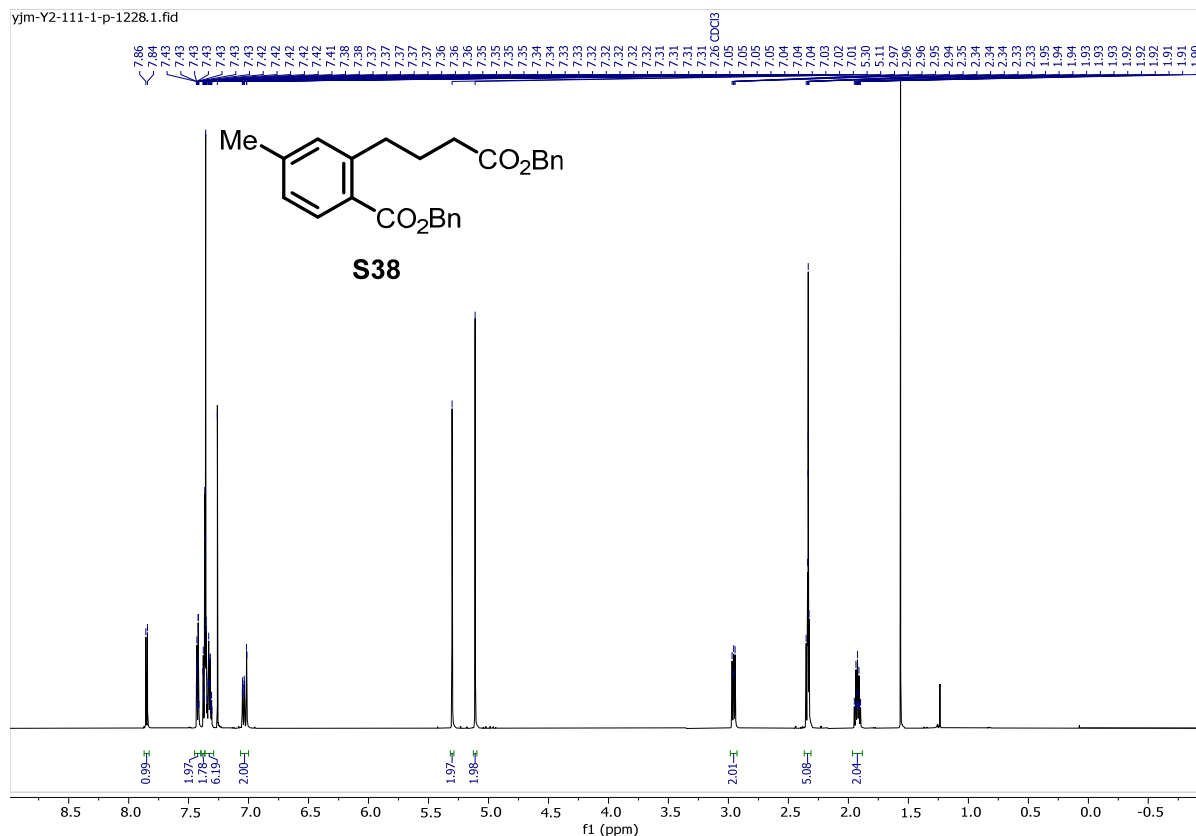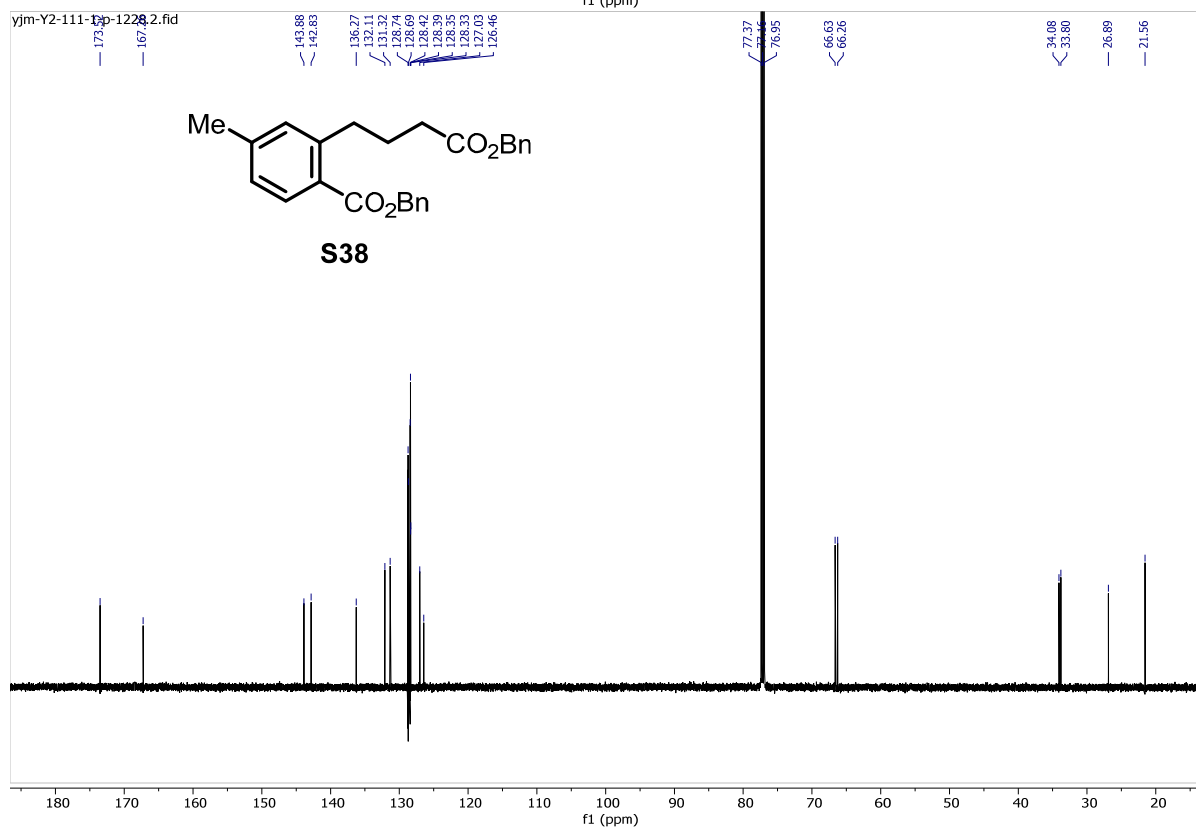

# 2-(3-Carboxypropyl)-4-methylbenzoic acid 38

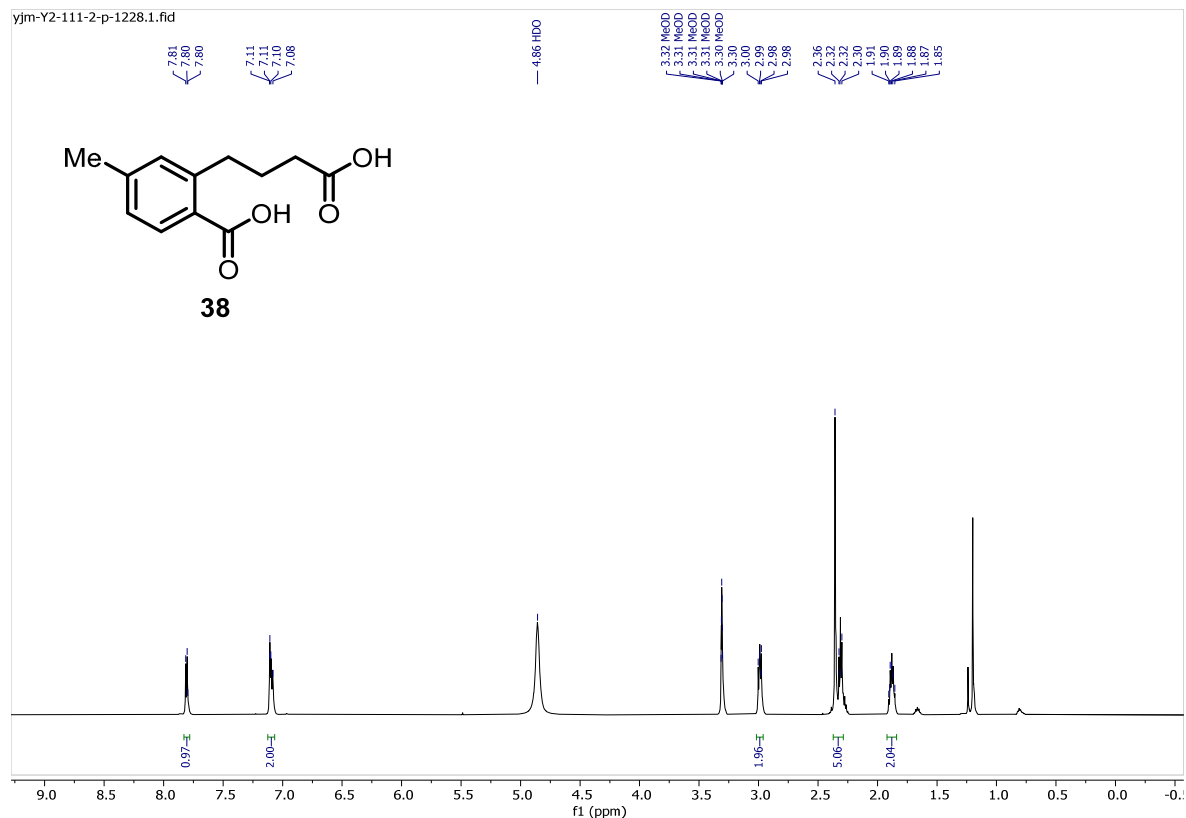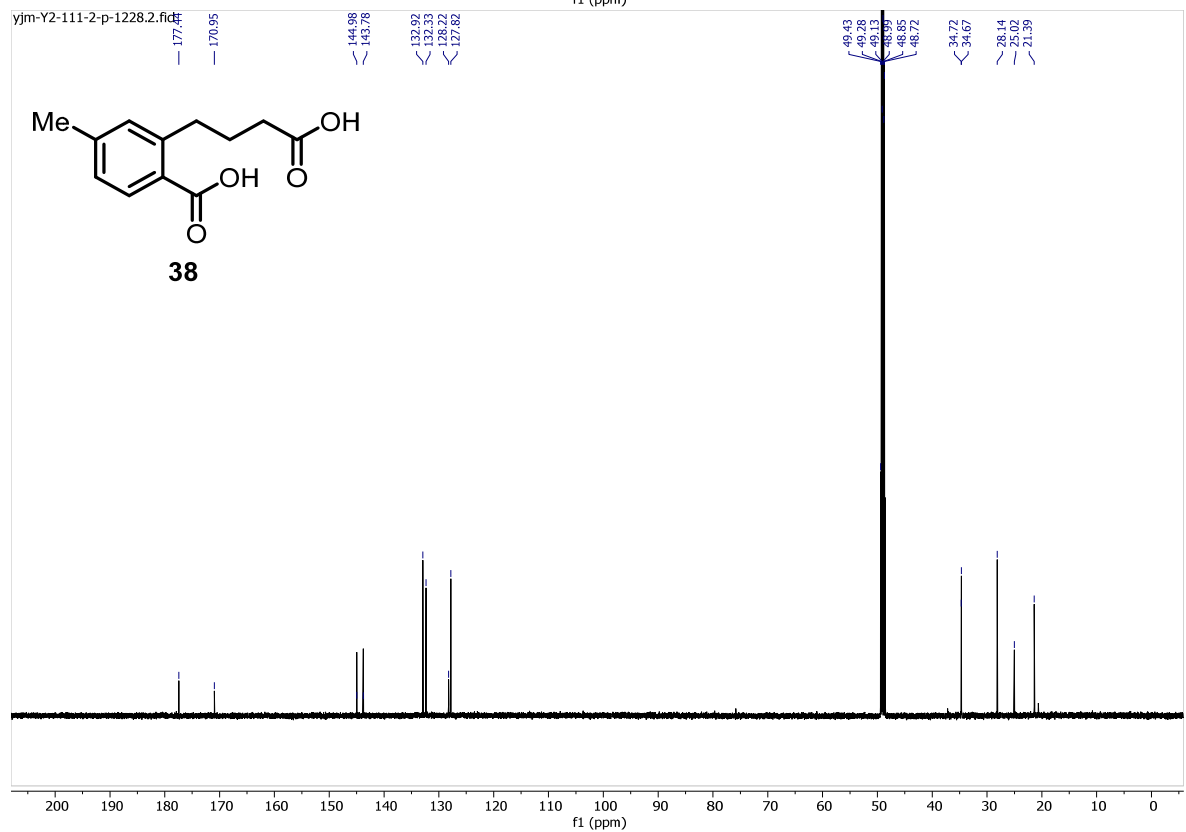



# Benzyl 2-(4-(benzyloxy)-4-oxobutyl)-3-methylbenzoate S39

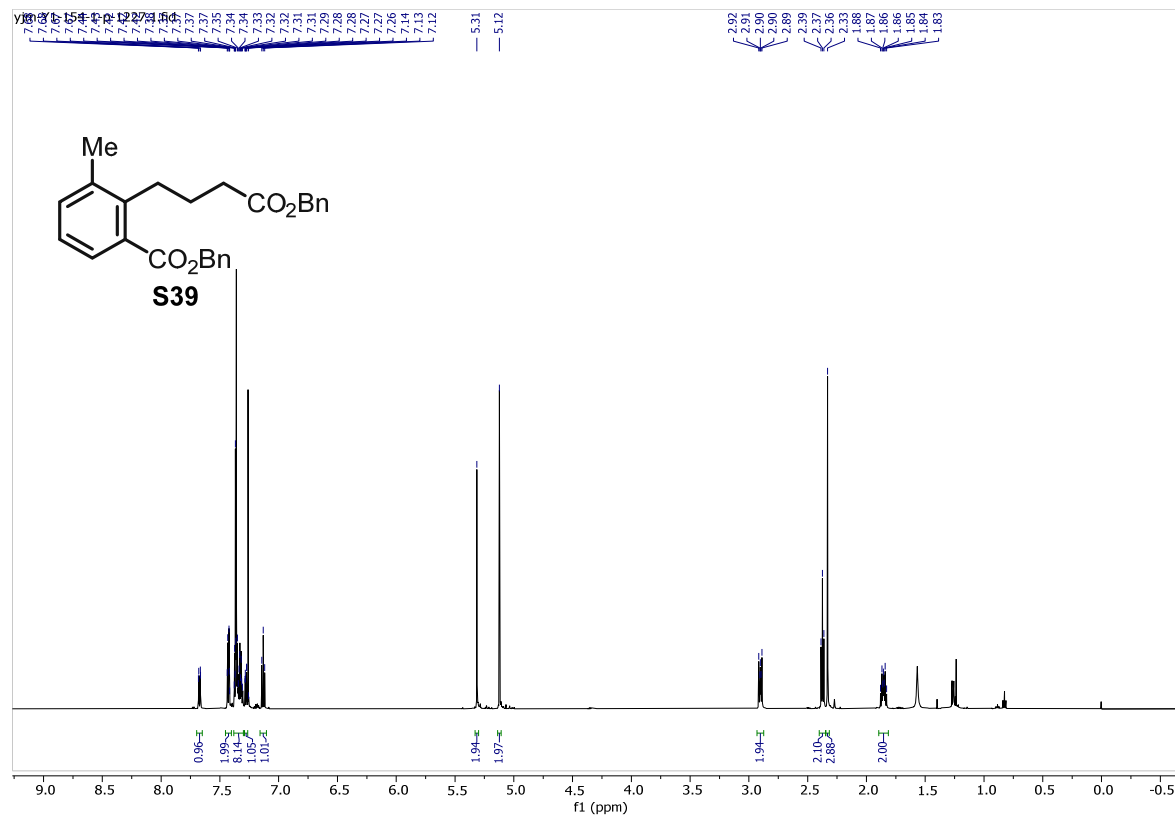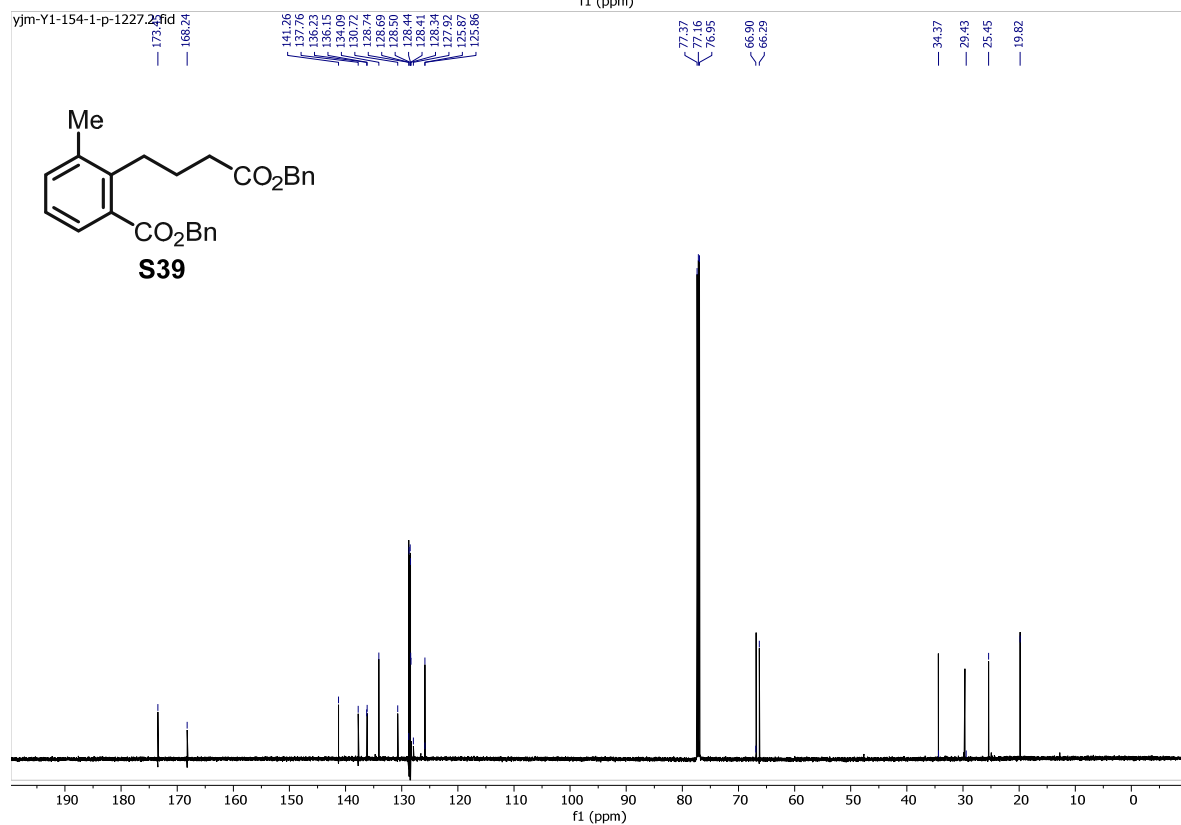

# 2-(3-Carboxypropyl)-3-methylbenzoic acid 39

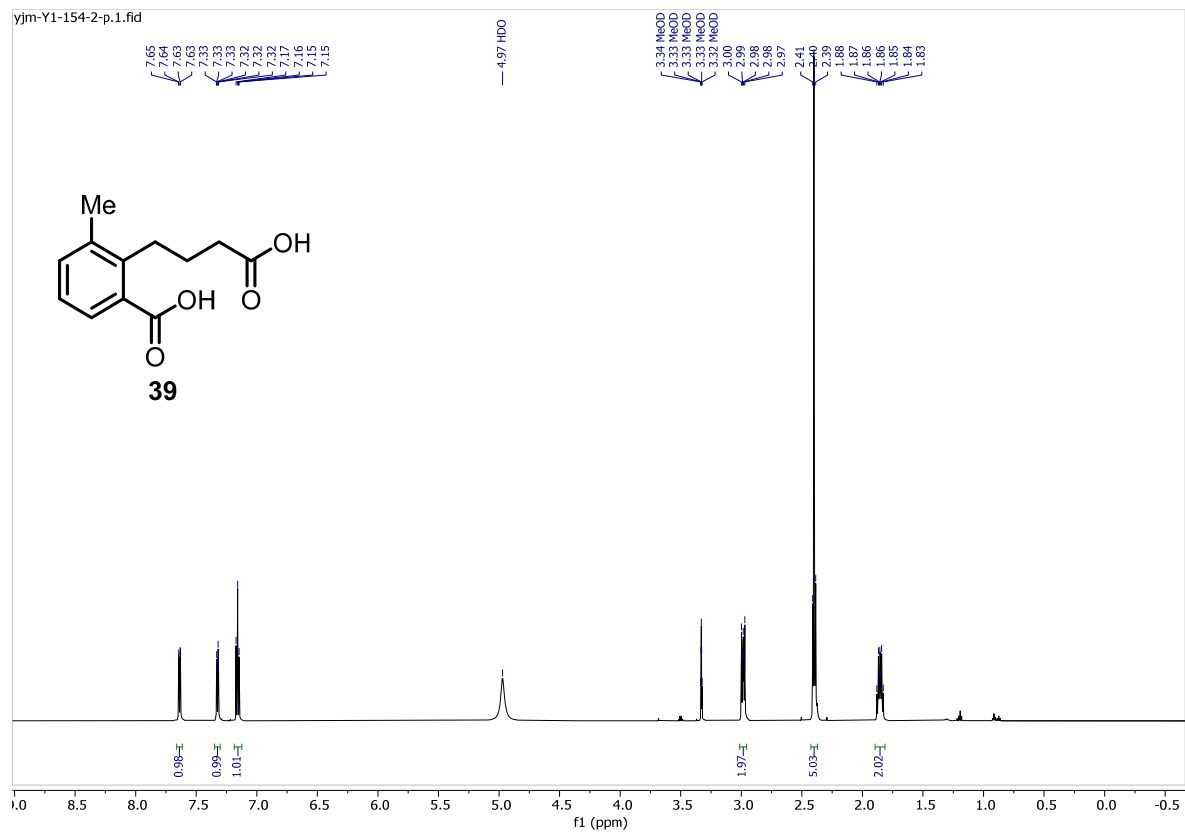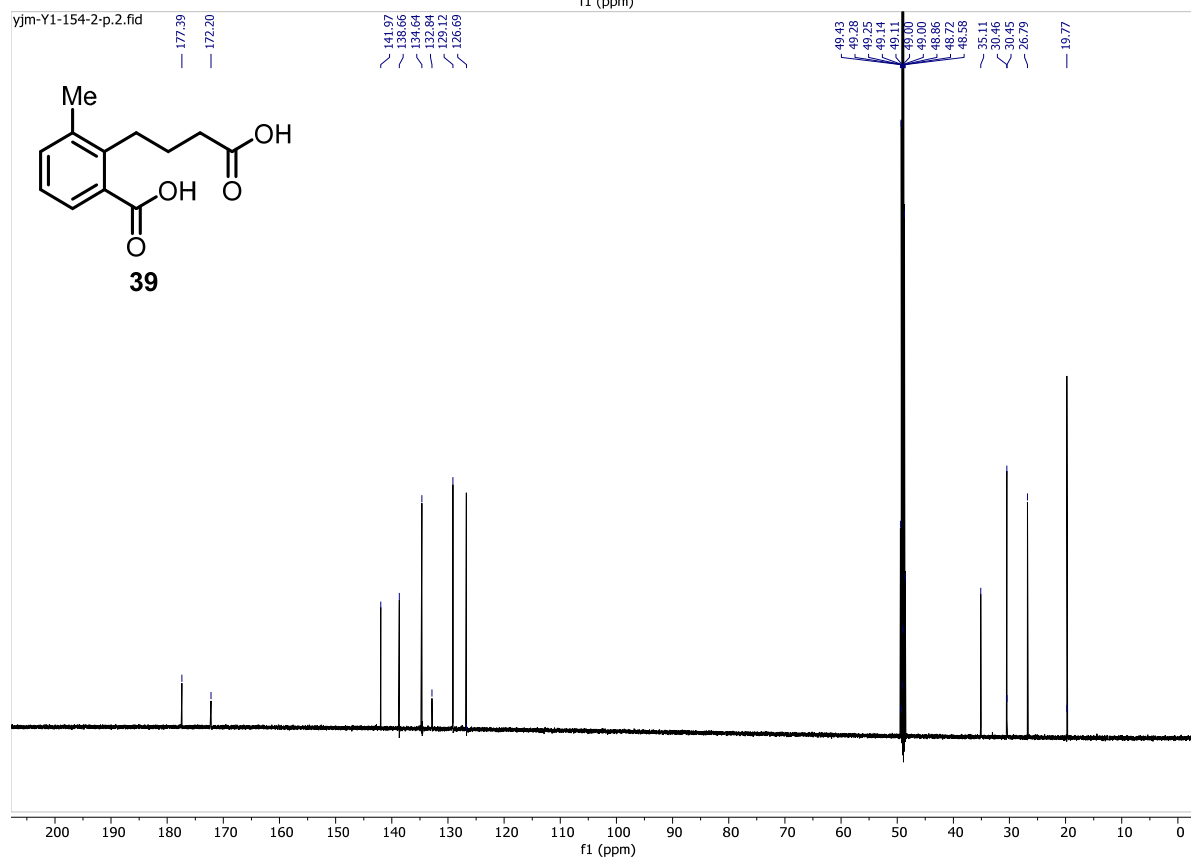



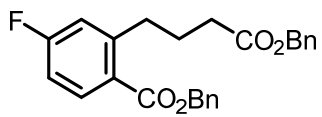

**S40**

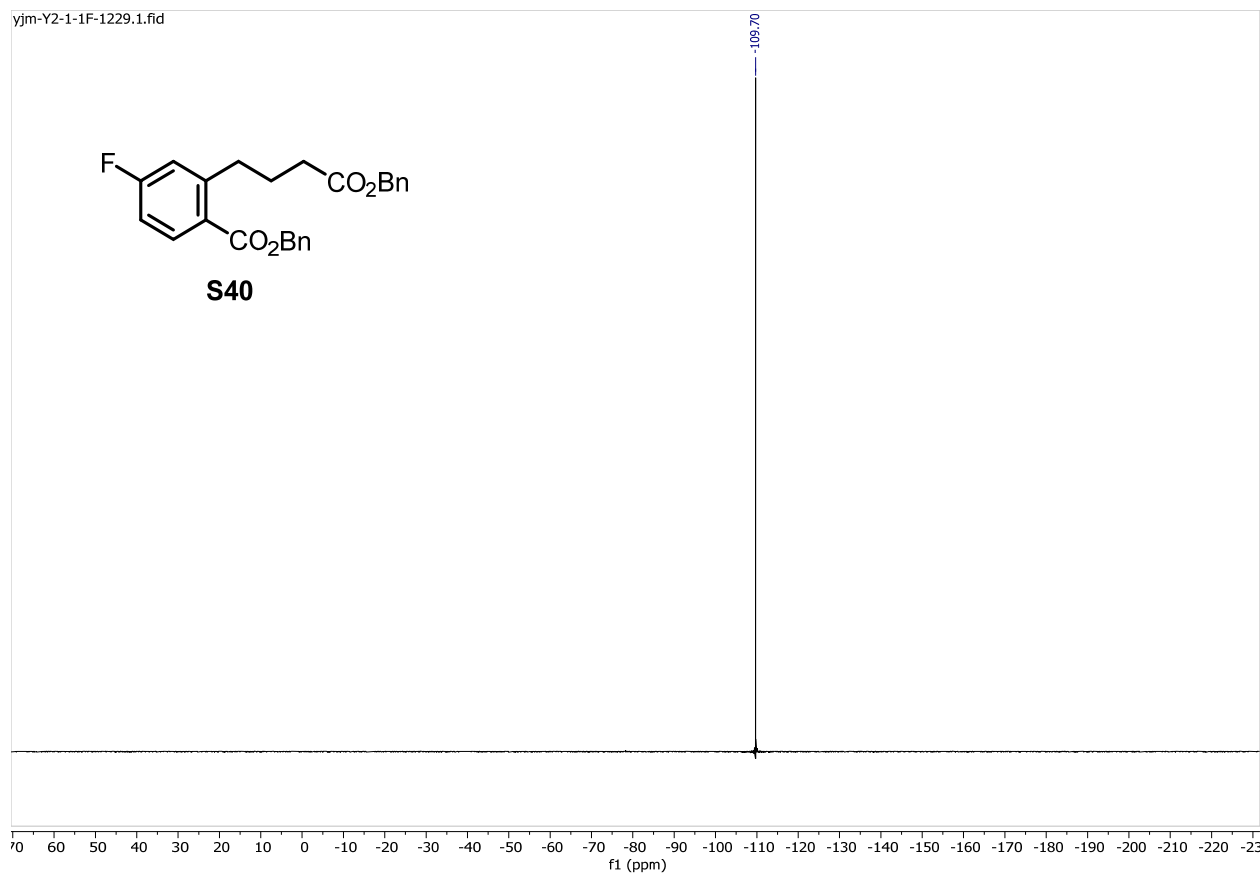

## 2-(3-Carboxypropyl)-4-fluorobenzoic acid 40

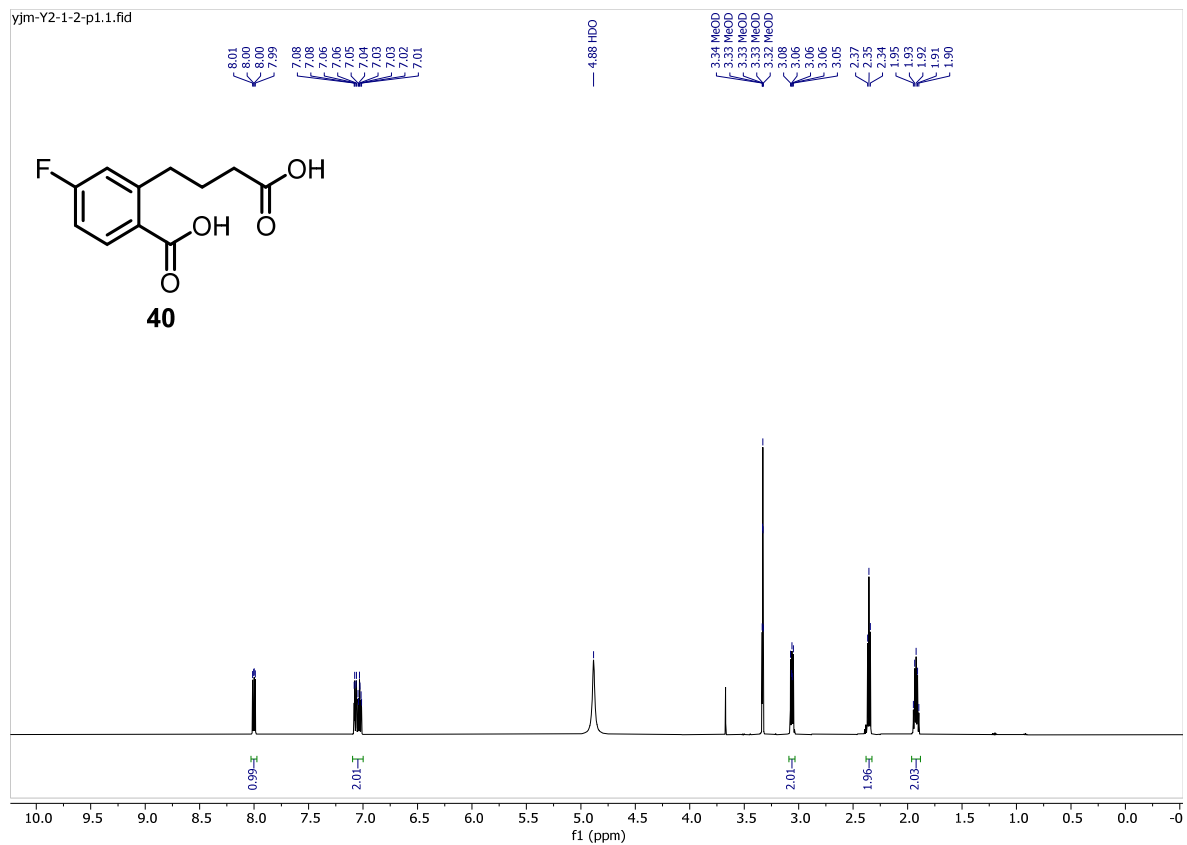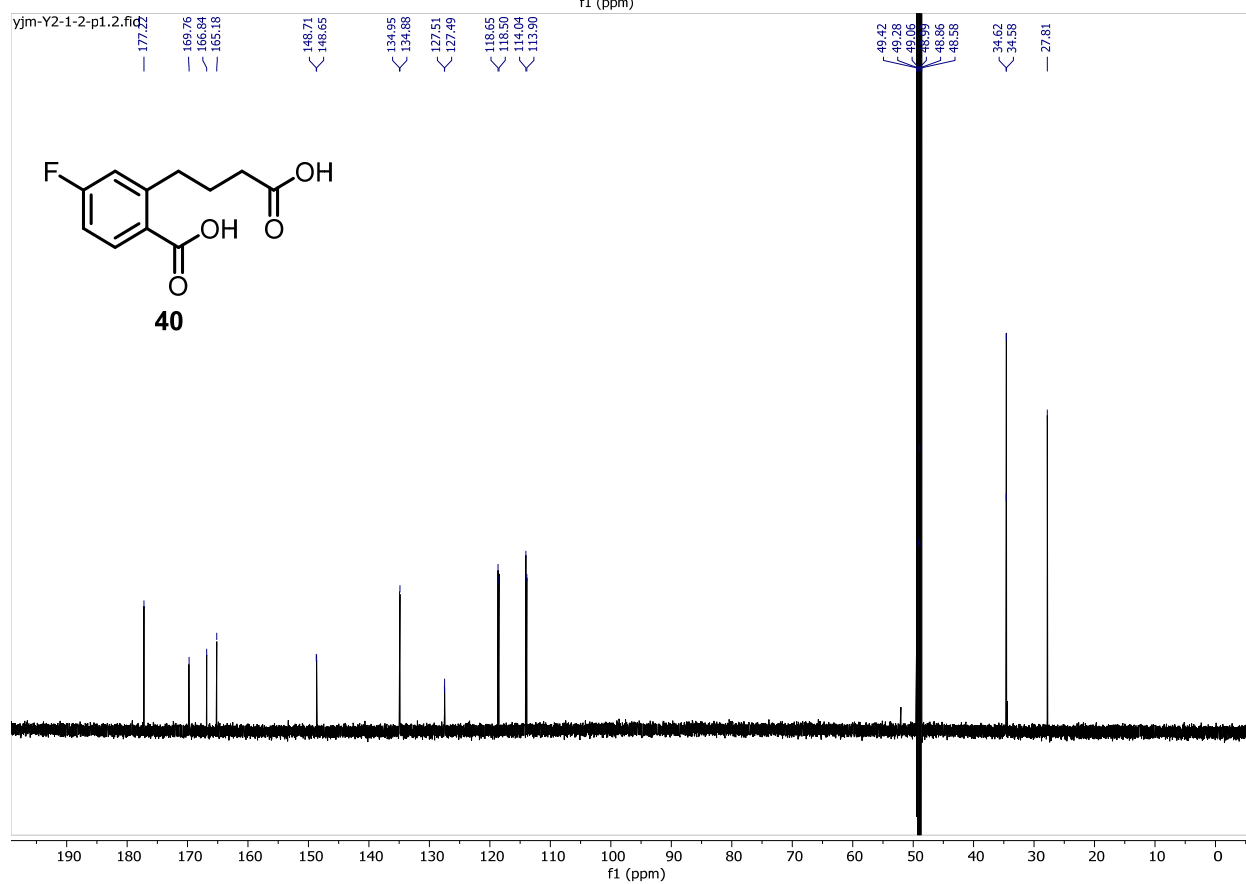

yjm-Y2-1-2F-1229.1.fid

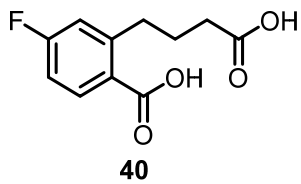

106.86

70 60 50 40 30 20 10 0 -10 -20 -30 -40 -50 -60 -70 -80 -90 -100 -110 -120 -130 -140 -150 -160 -170 -180 -190 -200 -210 -220 -230  
f1 (ppm)

# Benzyl 2-(4-(benzyloxy)-4-oxobutyl)-4-chlorobenzoate S41

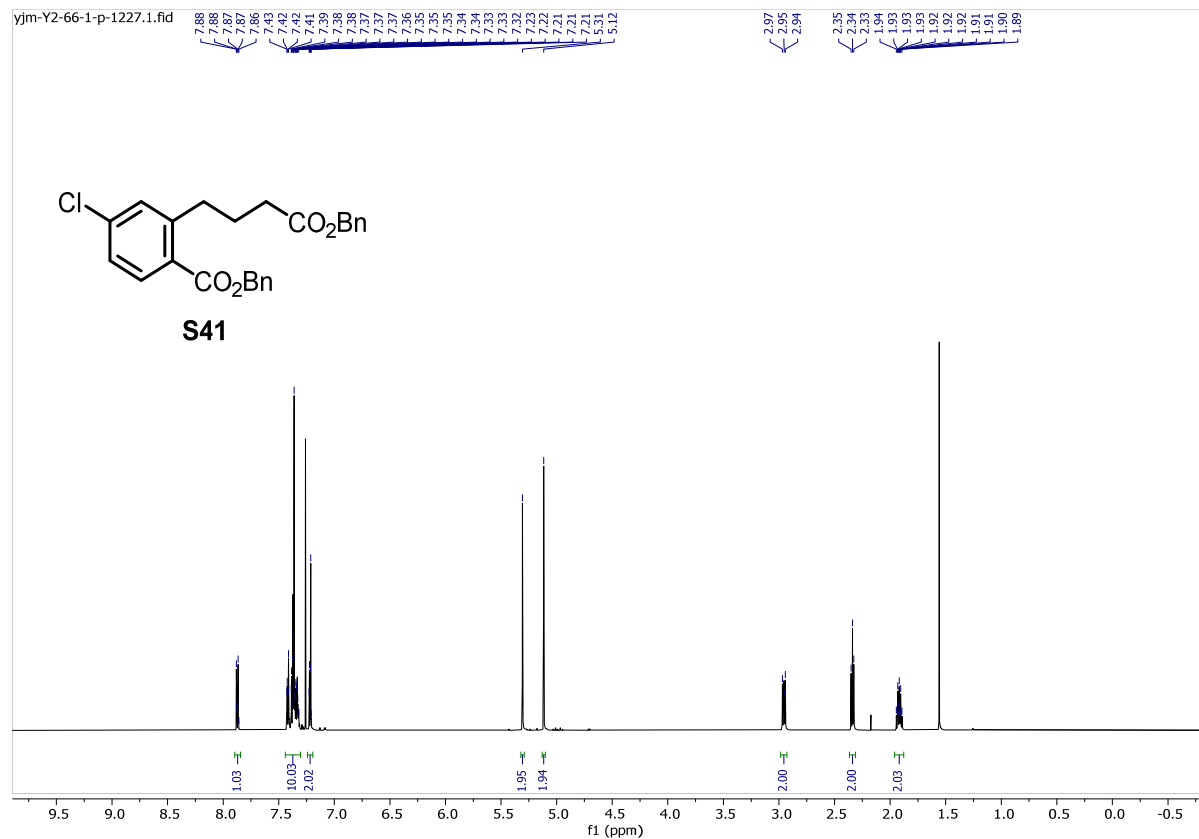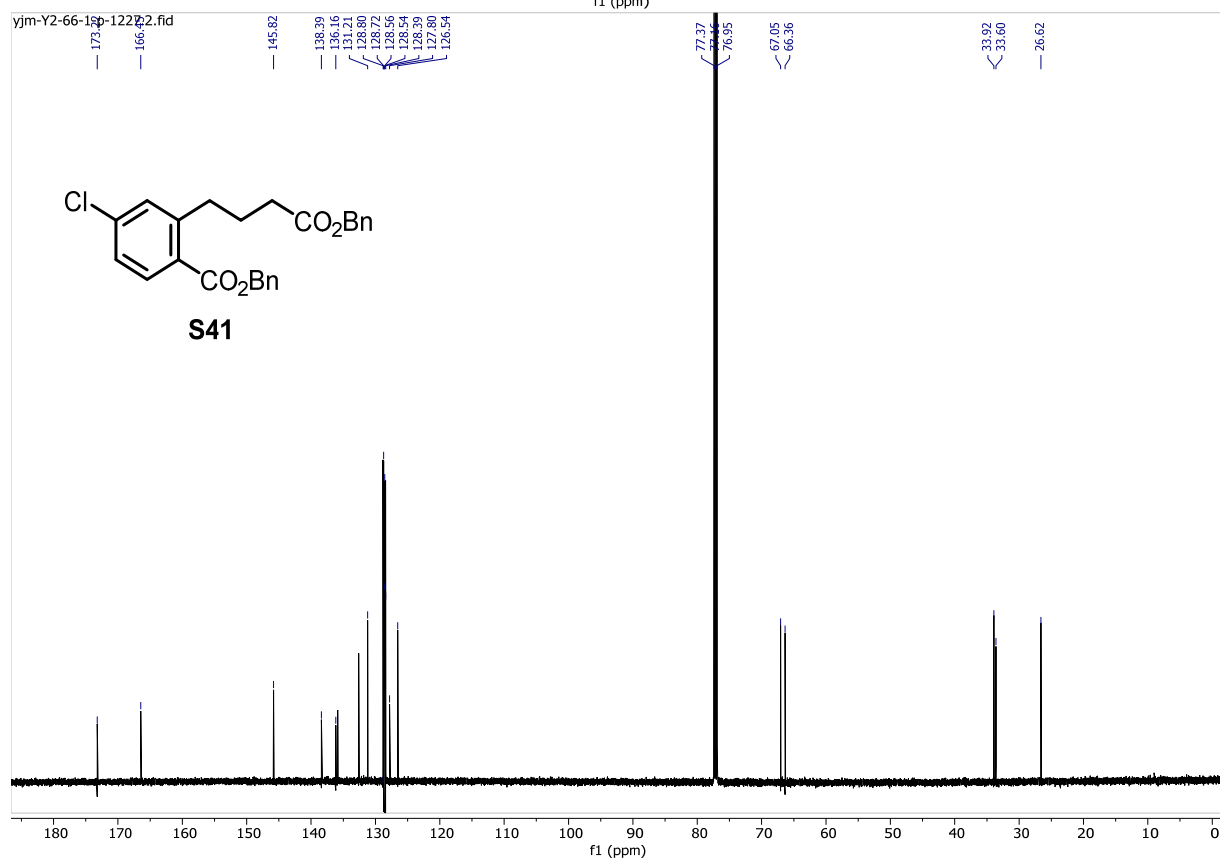

## 2-(3-Carboxypropyl)-4-chlorobenzoic acid 41

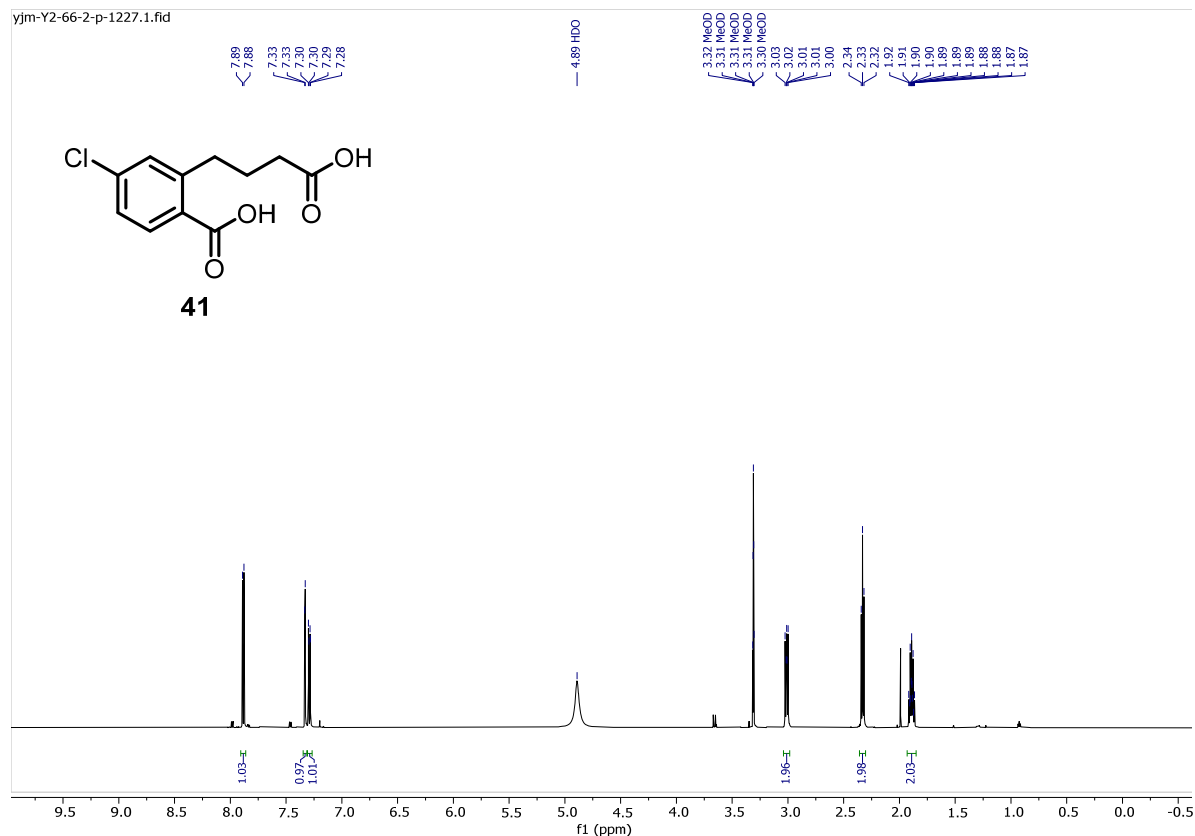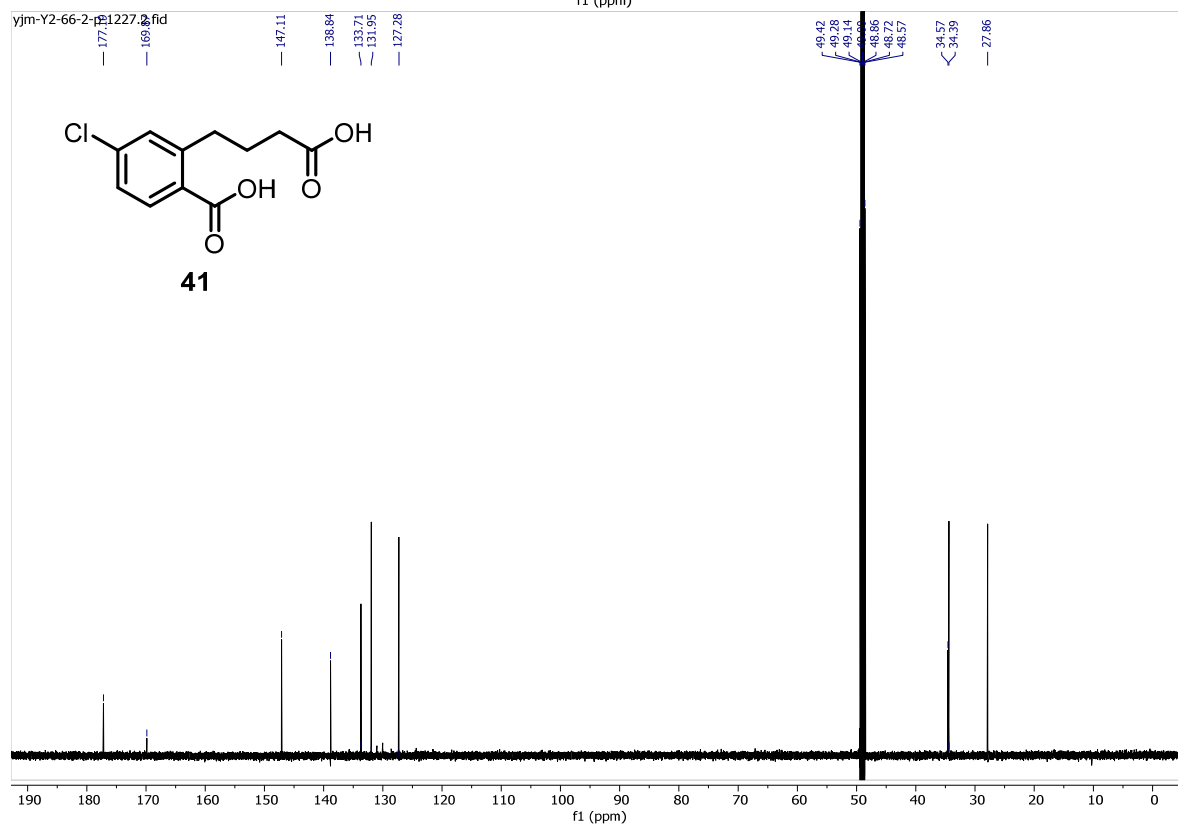





### 3-(3-Carboxypropyl)-[1,1'-biphenyl]-4-carboxylic acid 42

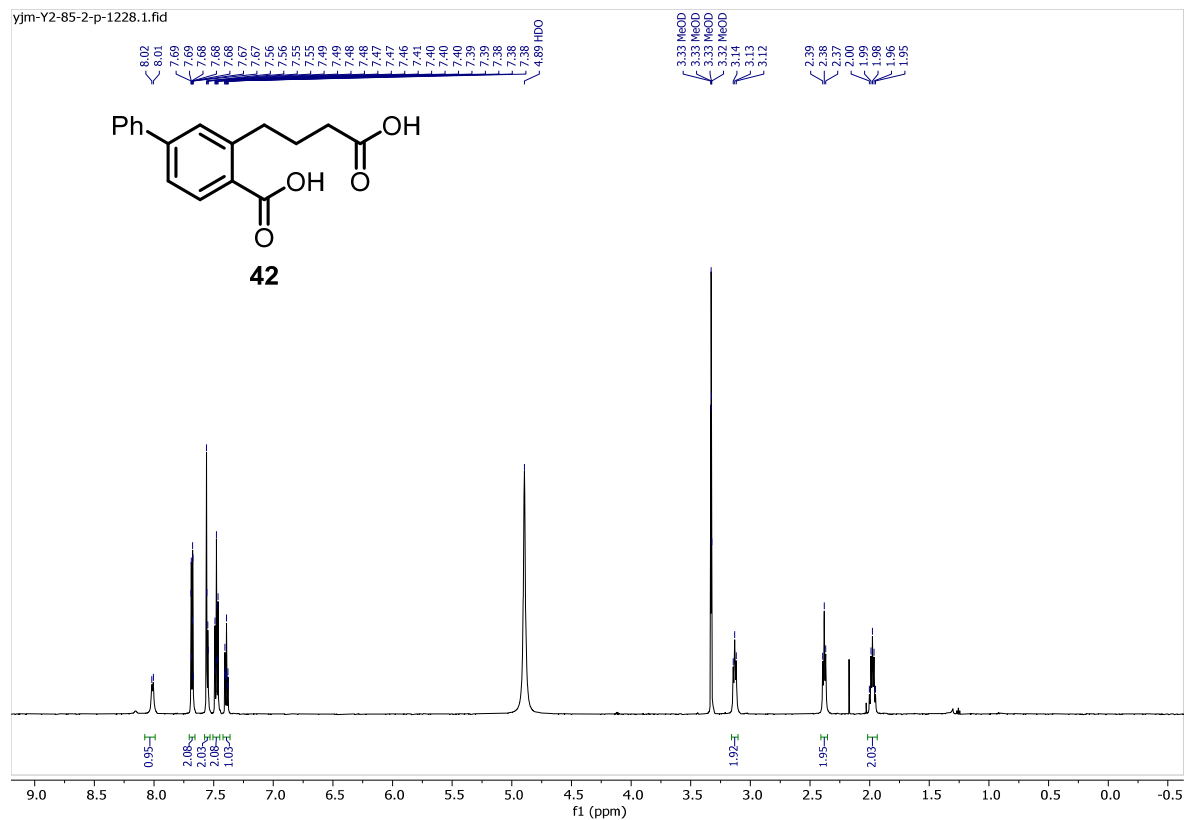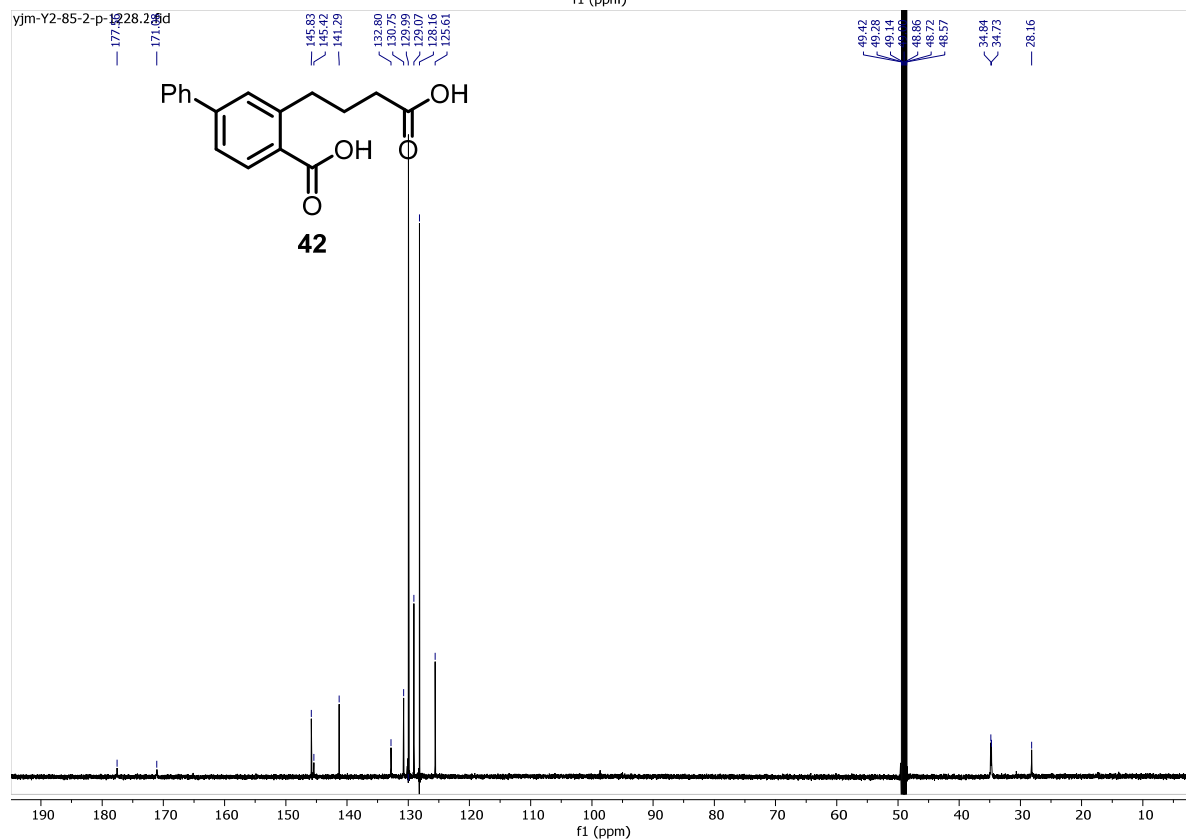

# Benzyl 3-(4-(benzyloxy)-4-oxobutyl)-2-naphthoate S43

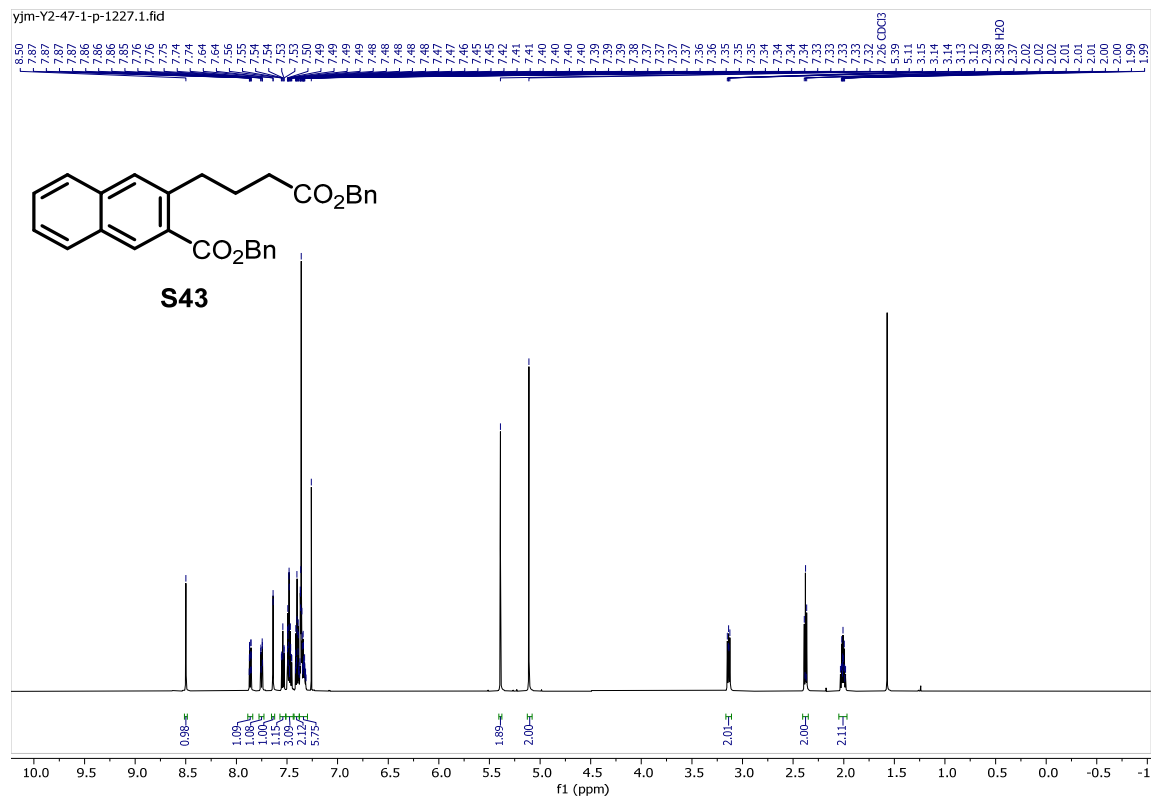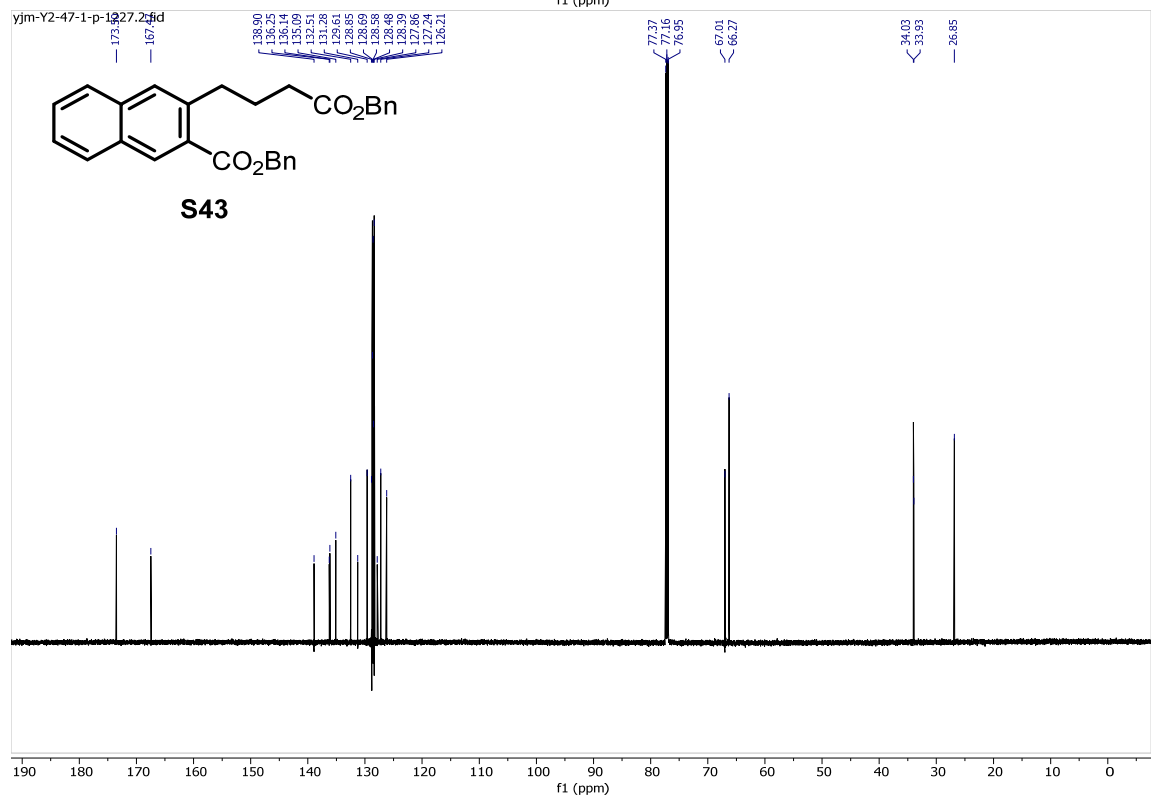

### 3-(3-Carboxypropyl)-2-naphthoic acid 43

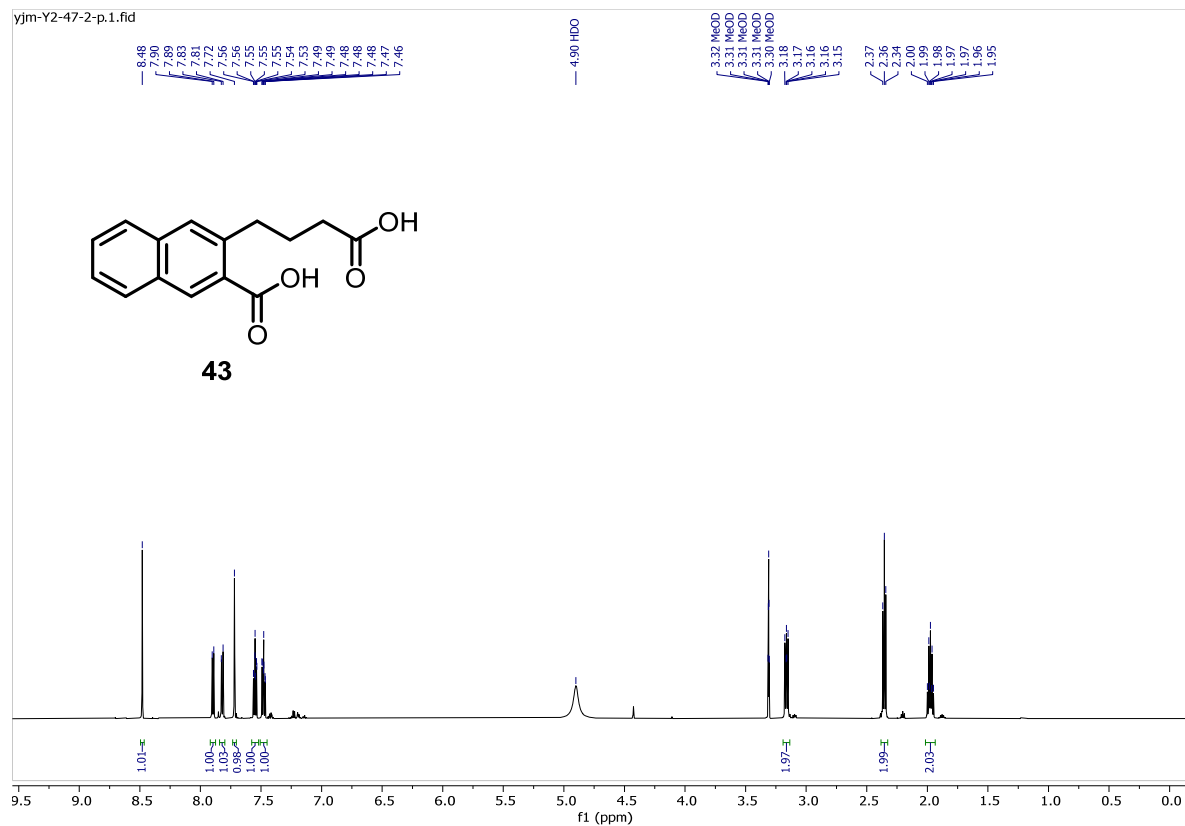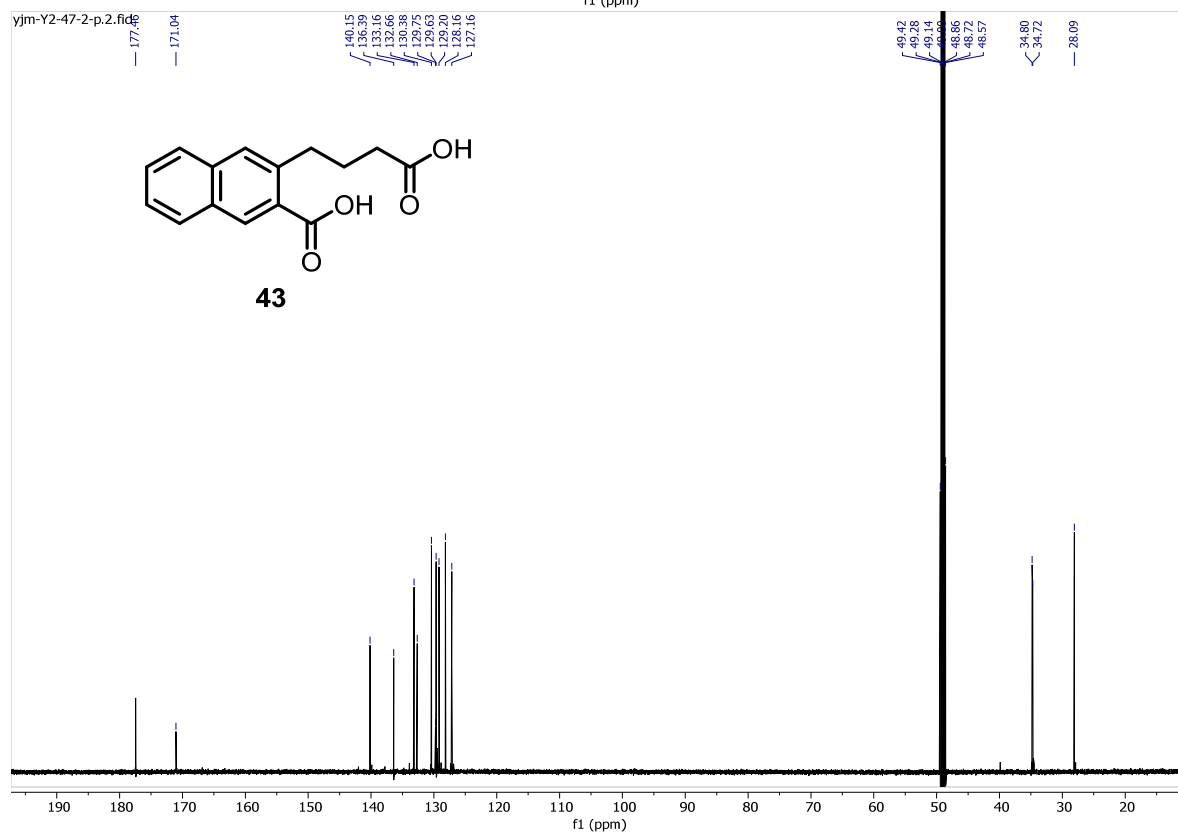

# Benzyl 2-(4-(benzyloxy)-4-oxobutyl)-5-(trifluoromethyl)benzoate S44

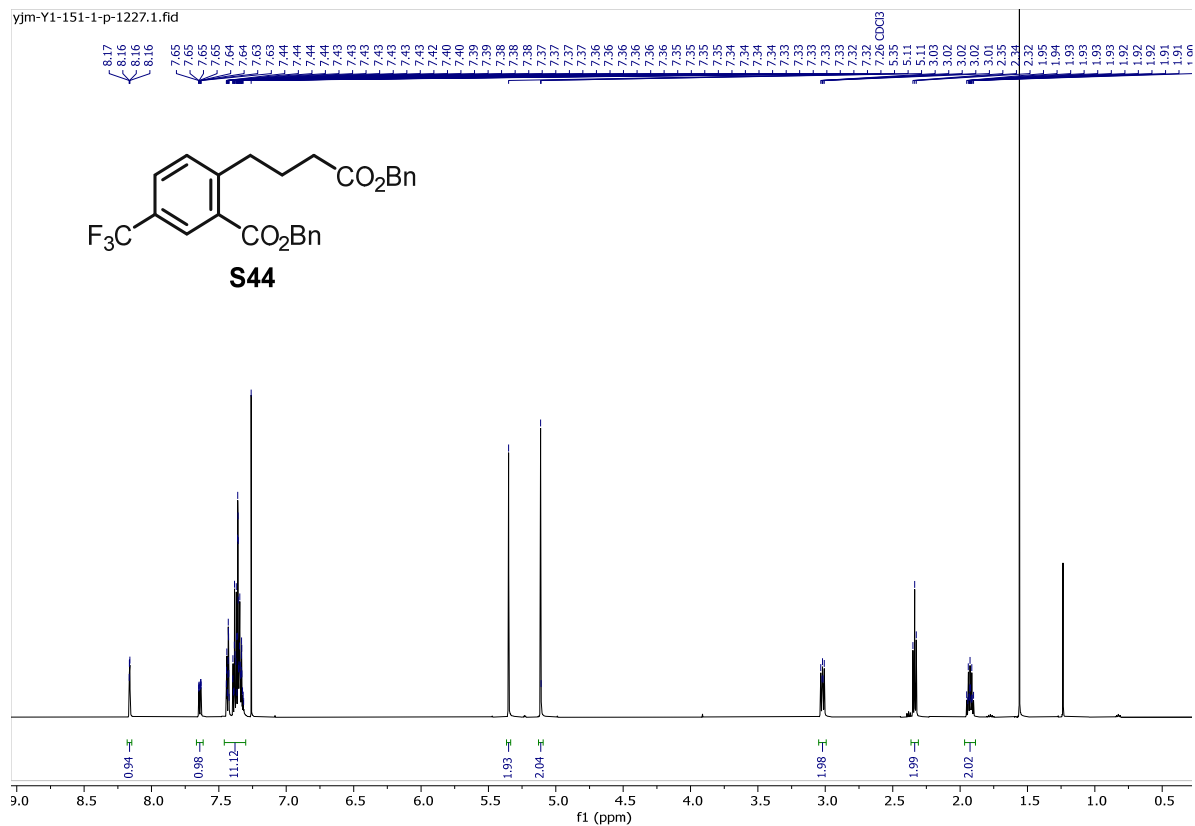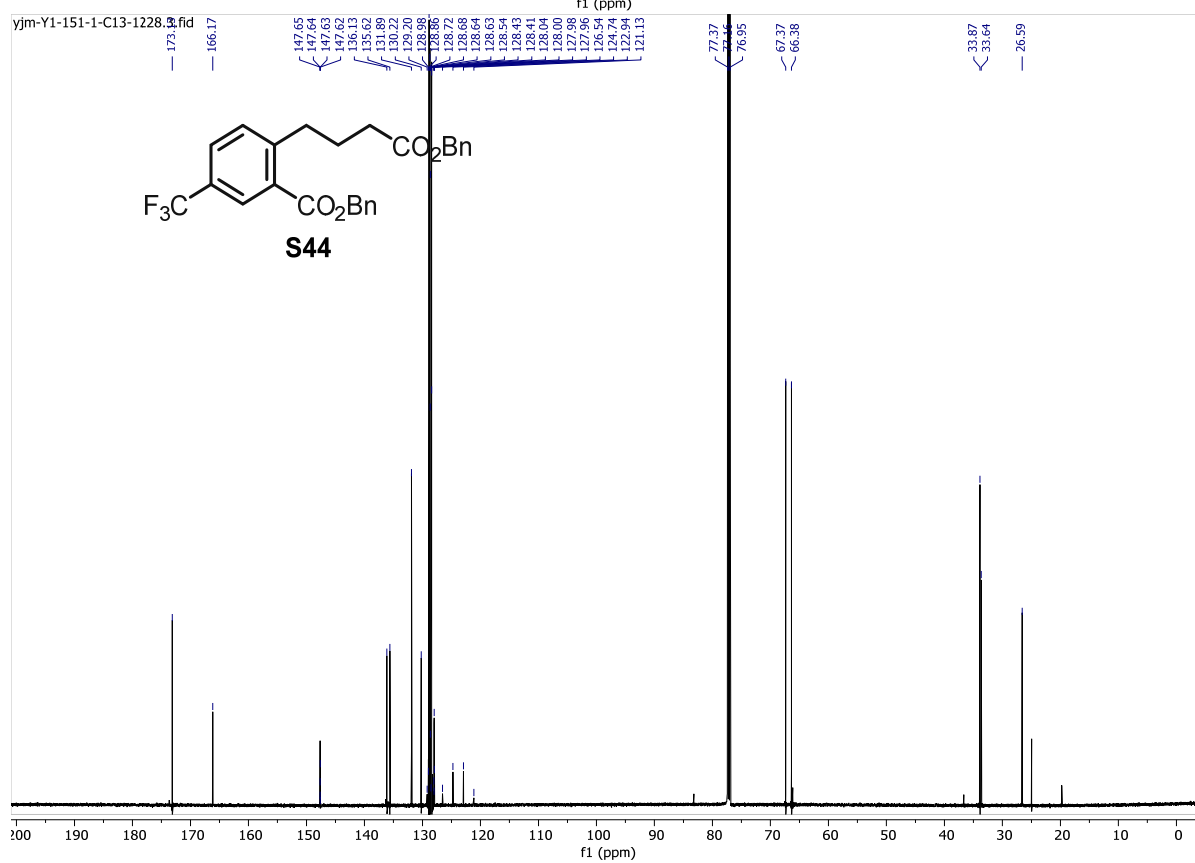

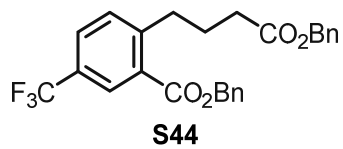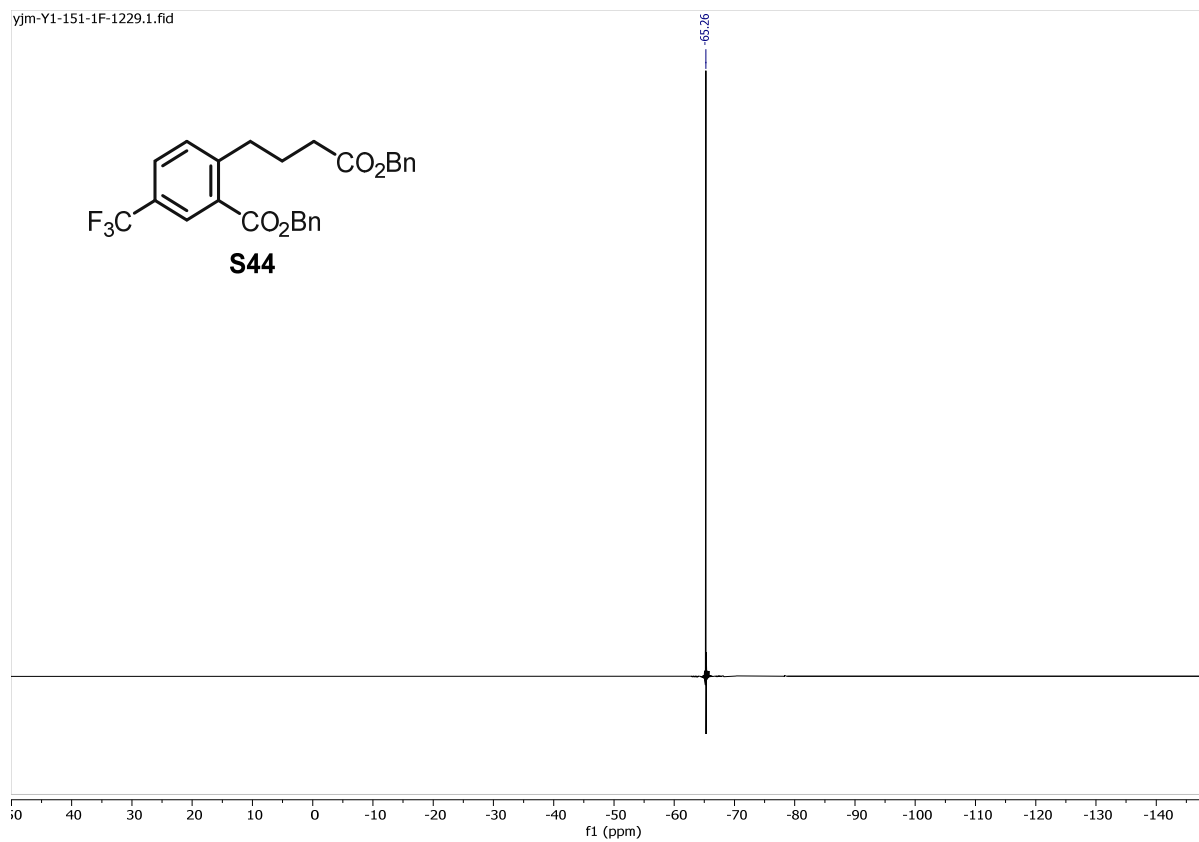

# 2-(3-Carboxypropyl)-5-(trifluoromethyl)benzoic acid 44

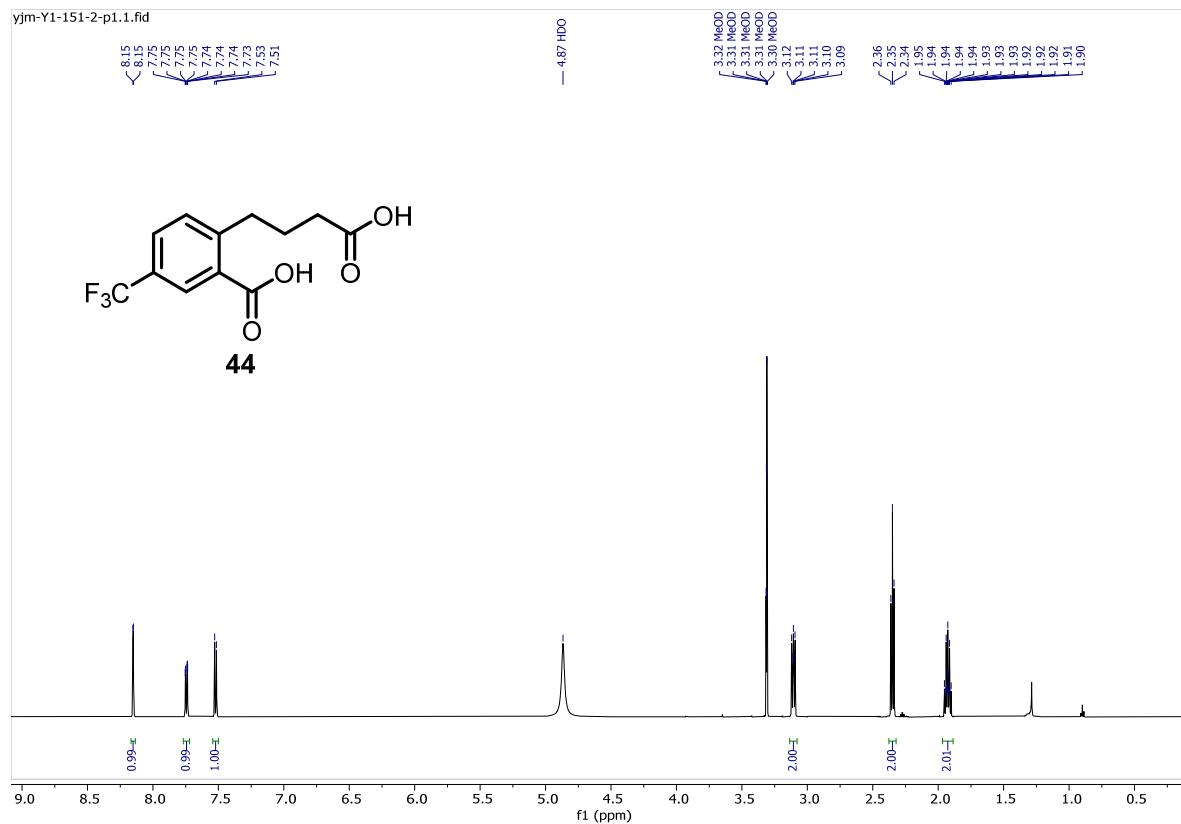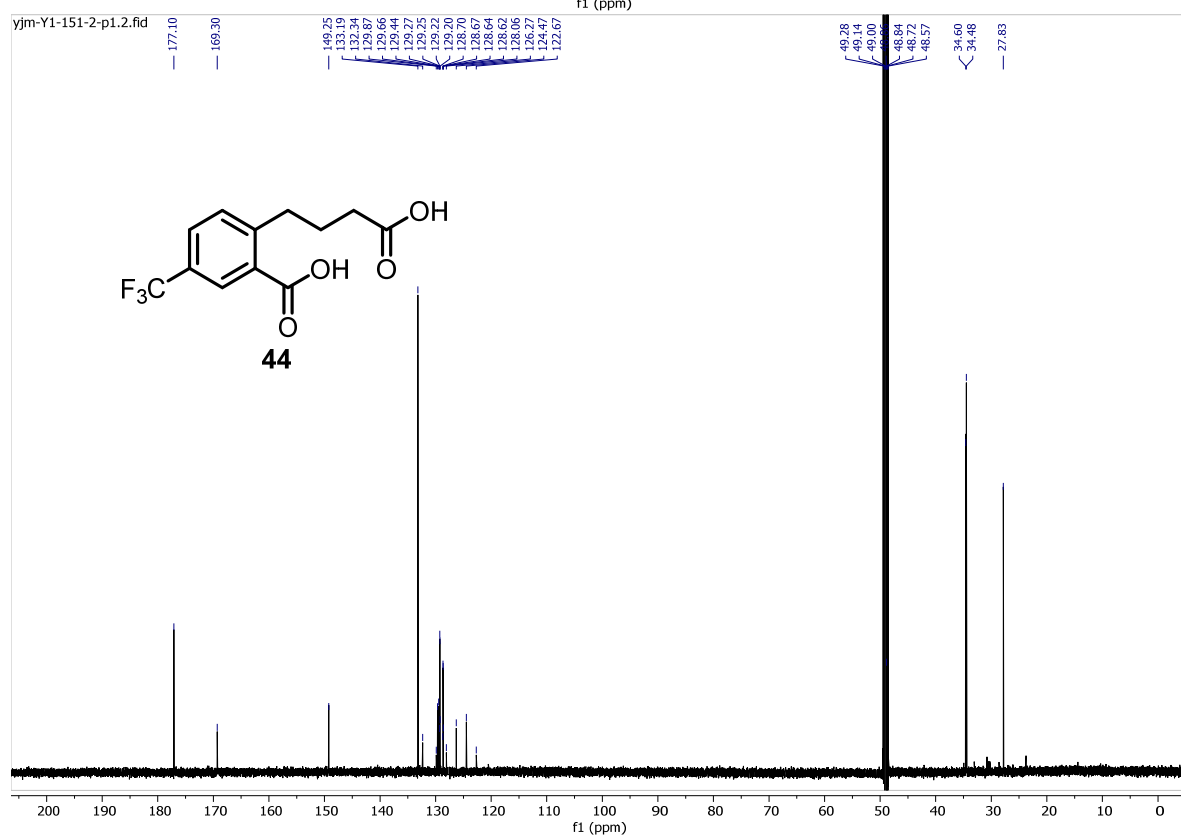

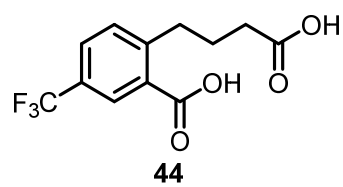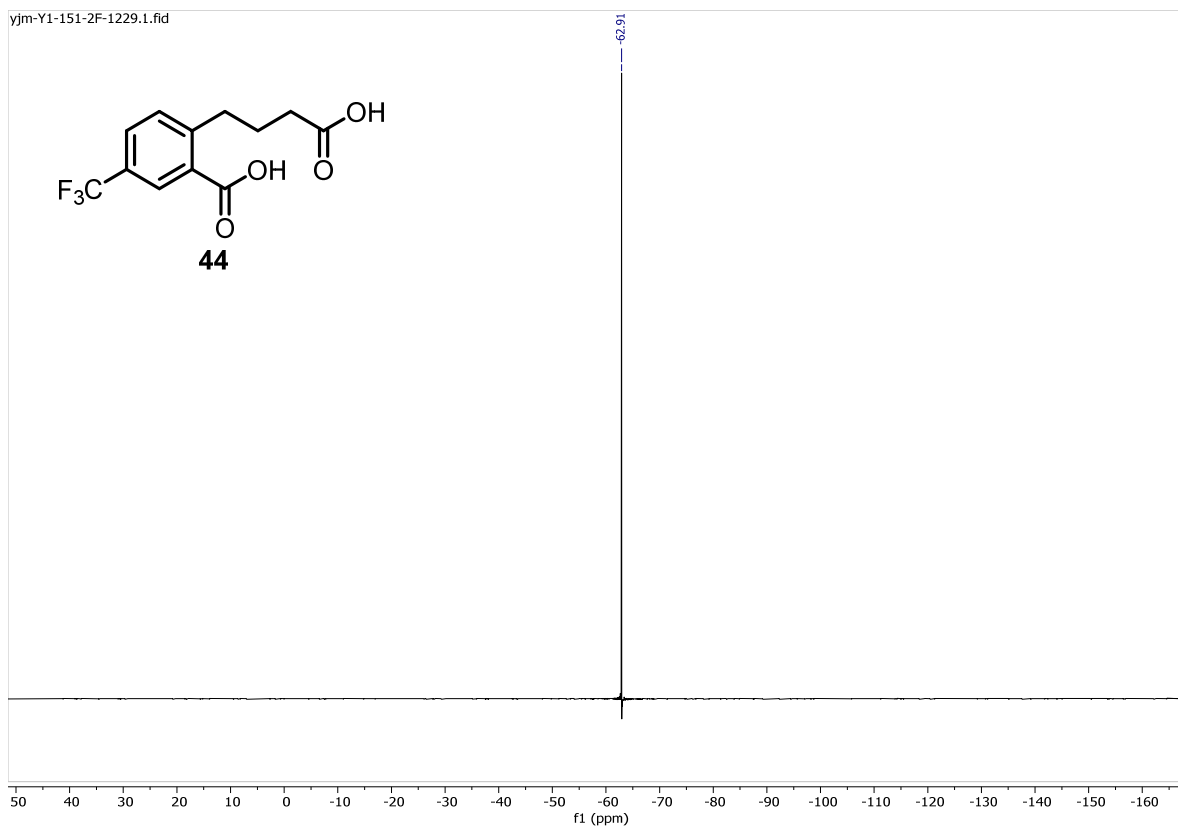



# Benzyl 3-(4-(benzyloxy)-4-oxobutyl)thiophene-2-carboxylate S45

yjm-Y1-152-1.1.fid

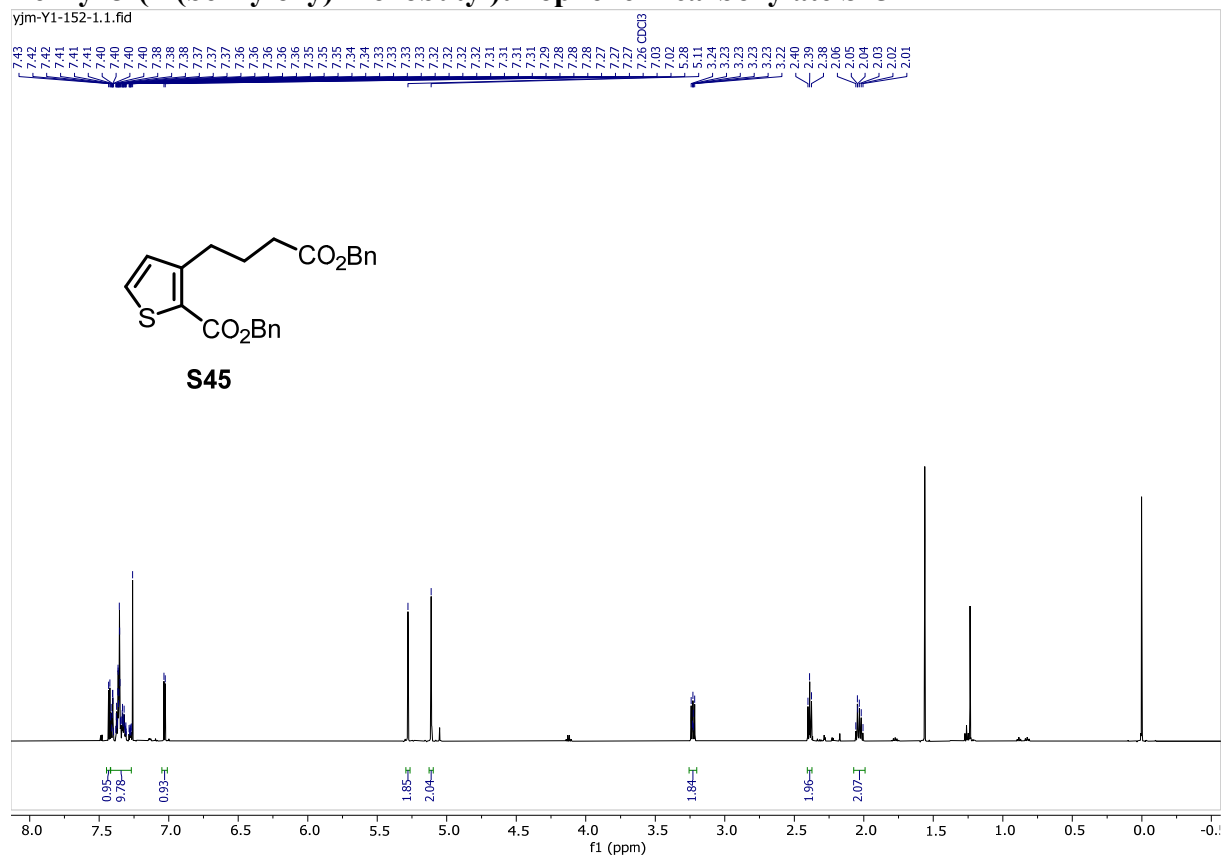

yjm-Y1-152-1.2.fid

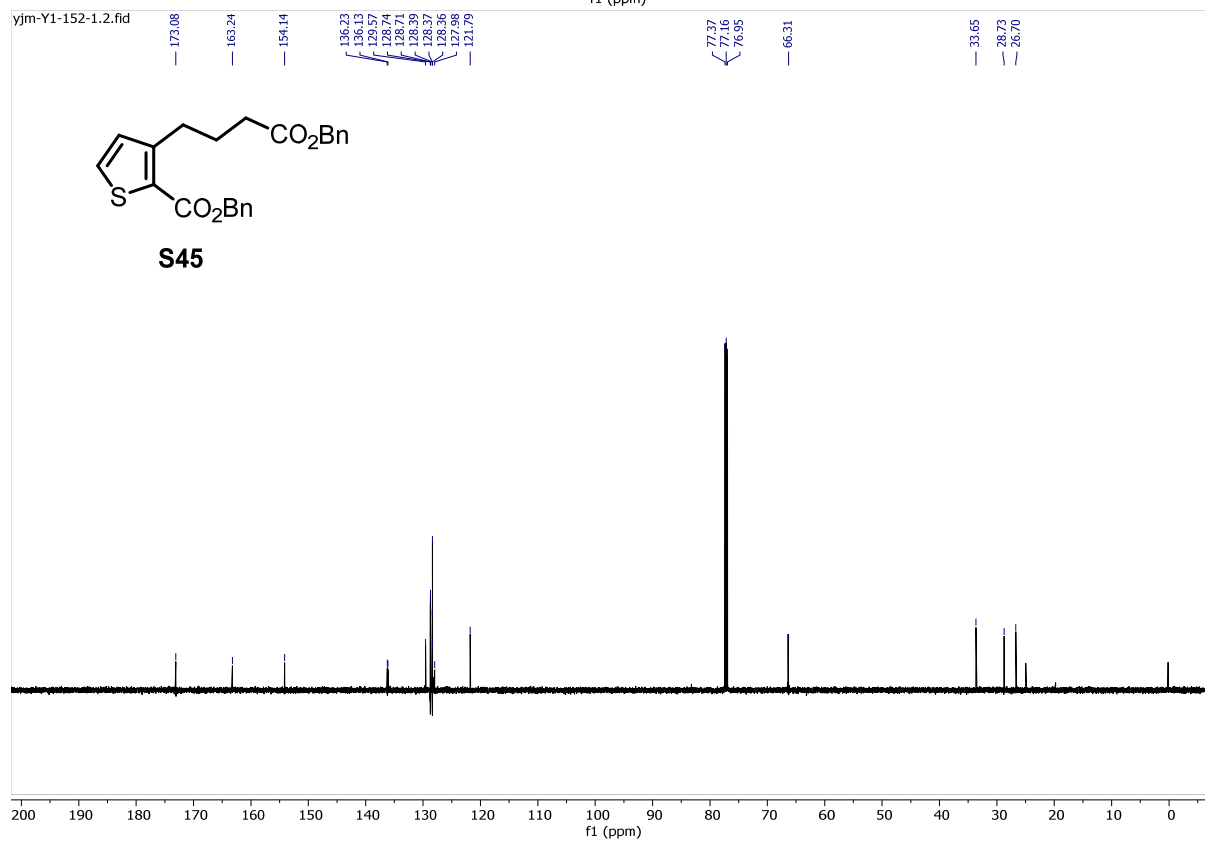

### 3-(3-Carboxypropyl)thiophene-2-carboxylic acid 45

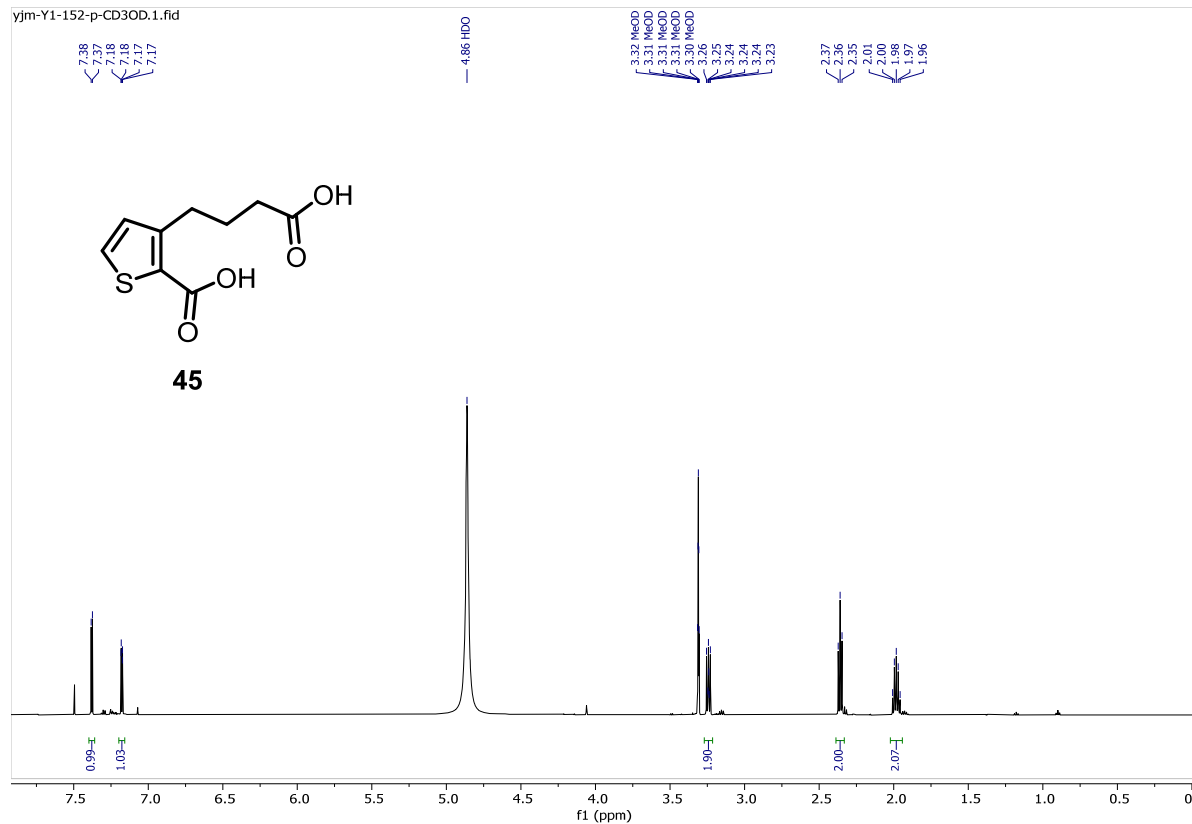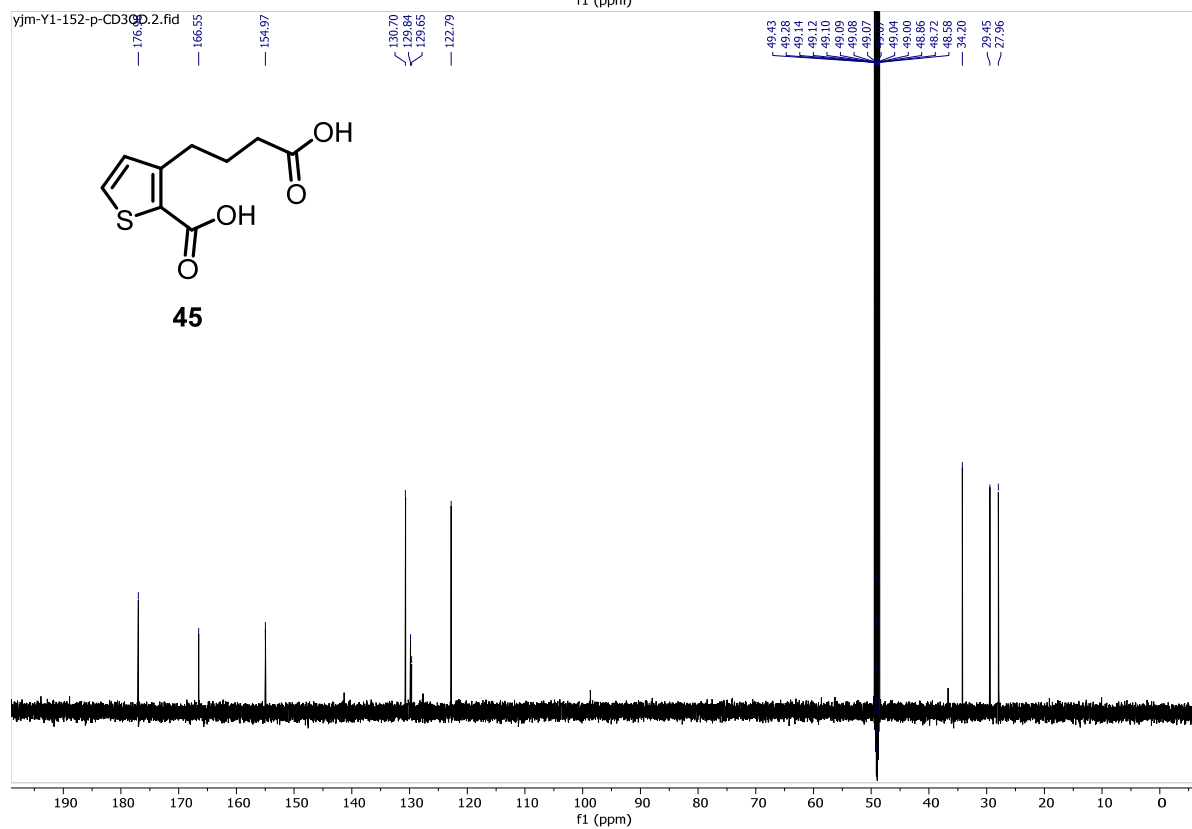

## 2-Ethylheptanedioic acid 26

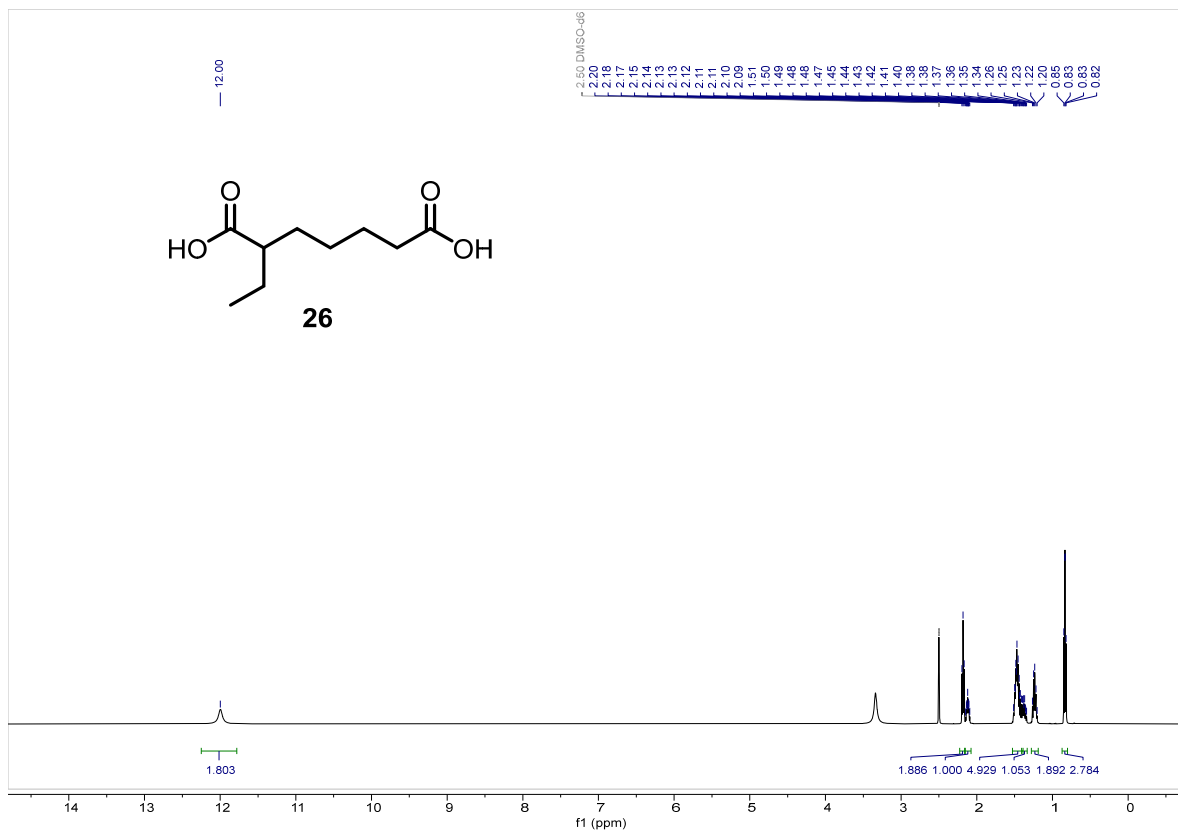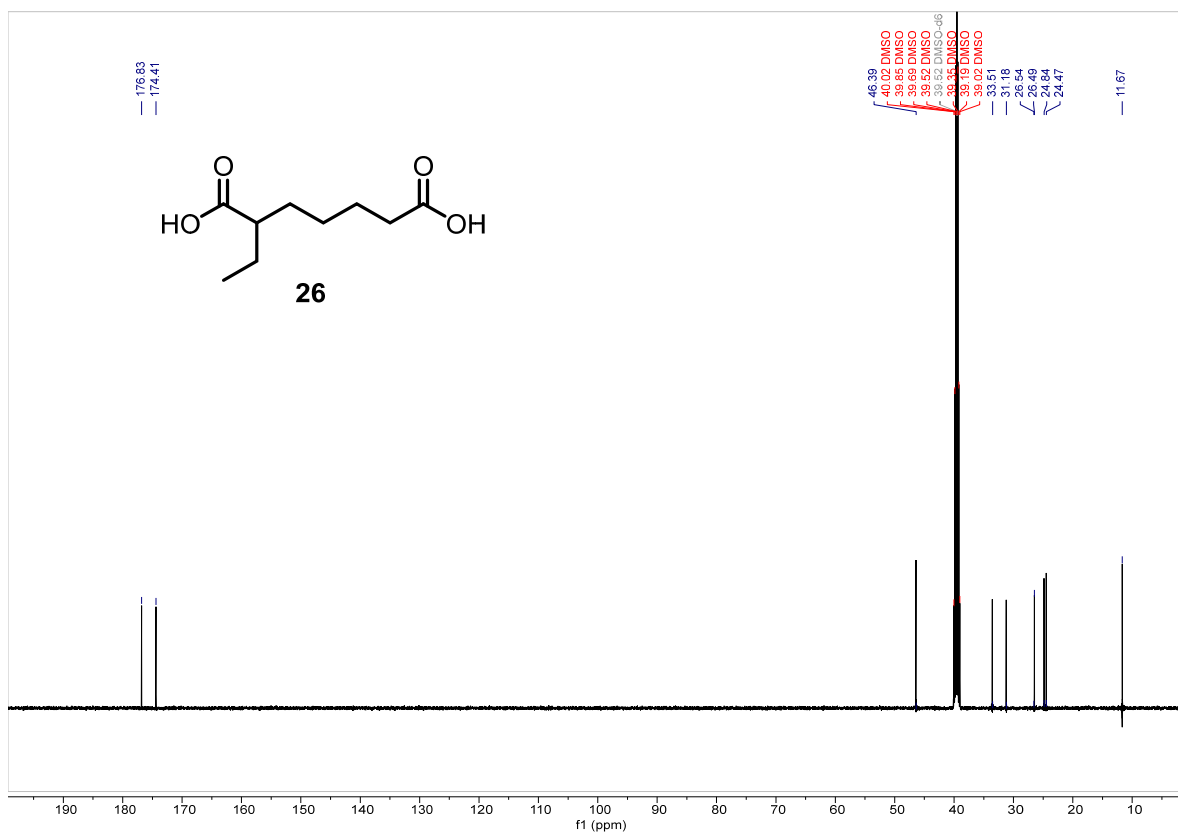

## 2-Isopropylheptanedioic acid 27

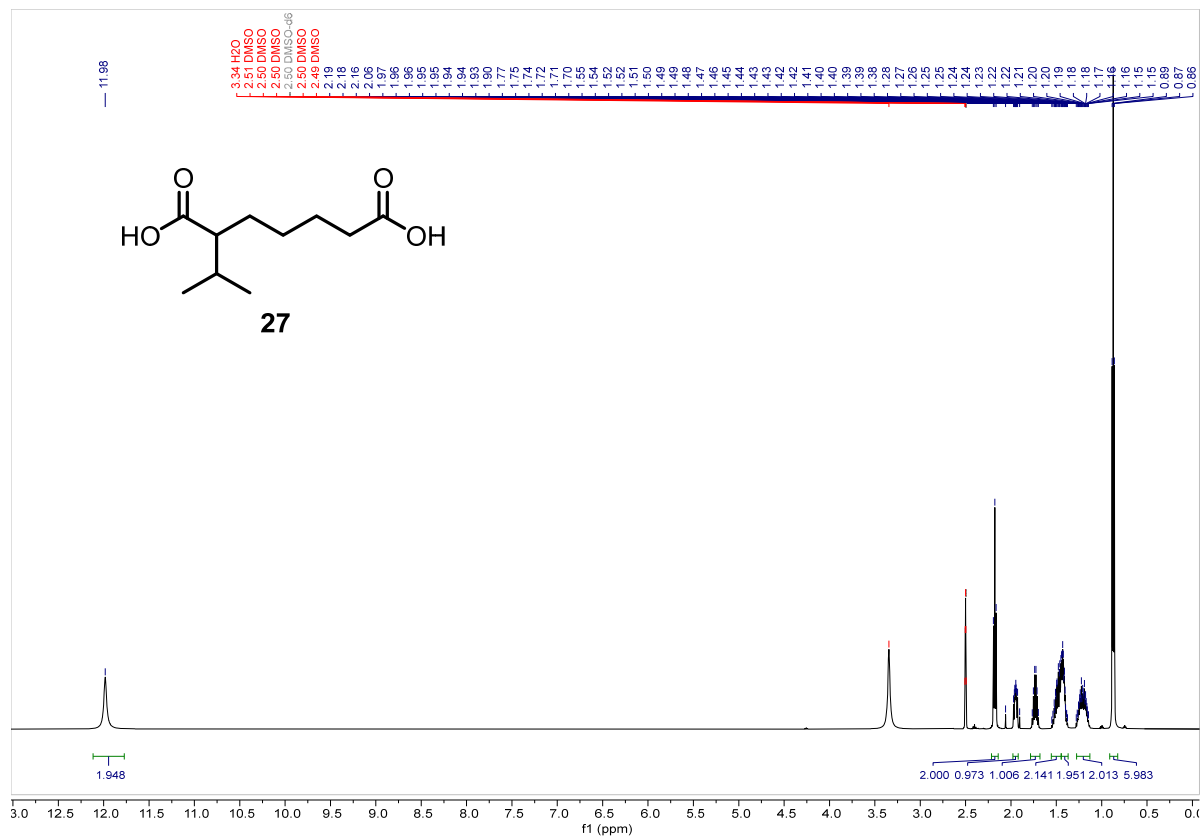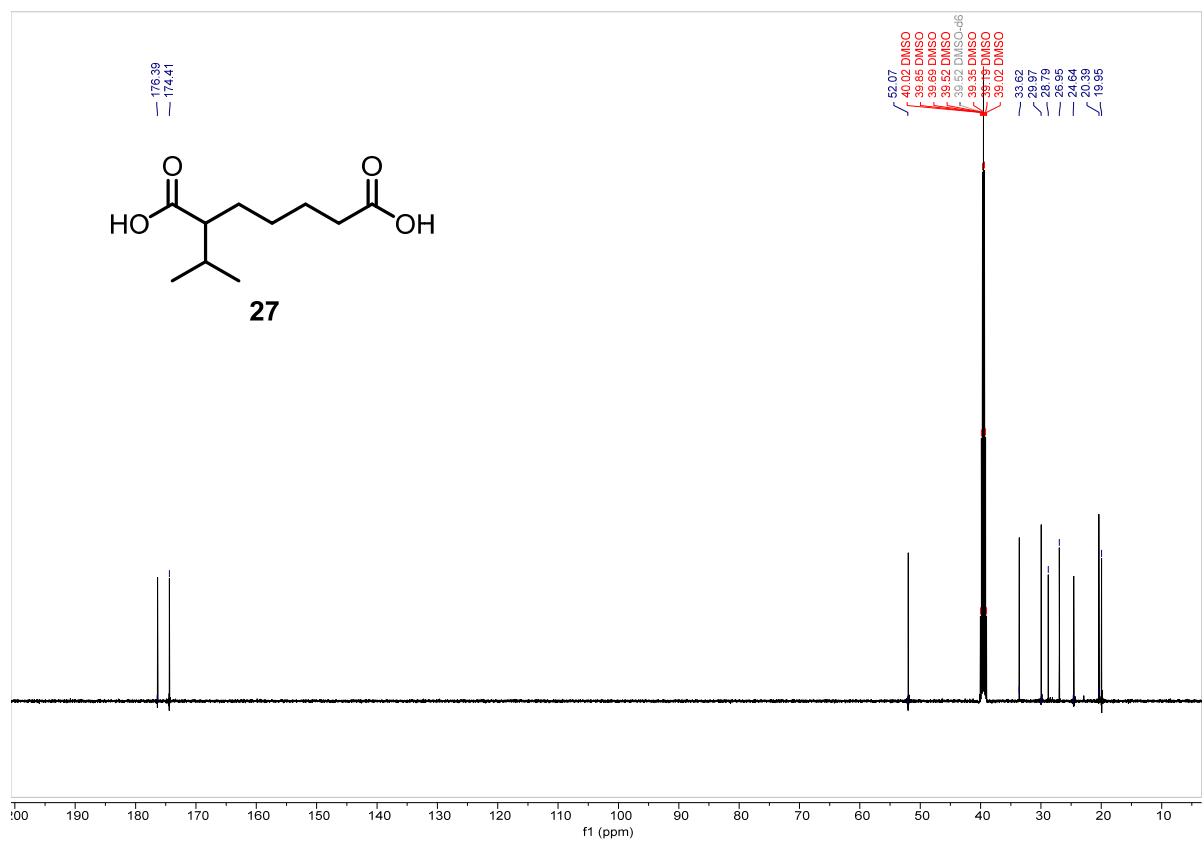

# 2,2-Dimethylheptanedioic acid 28

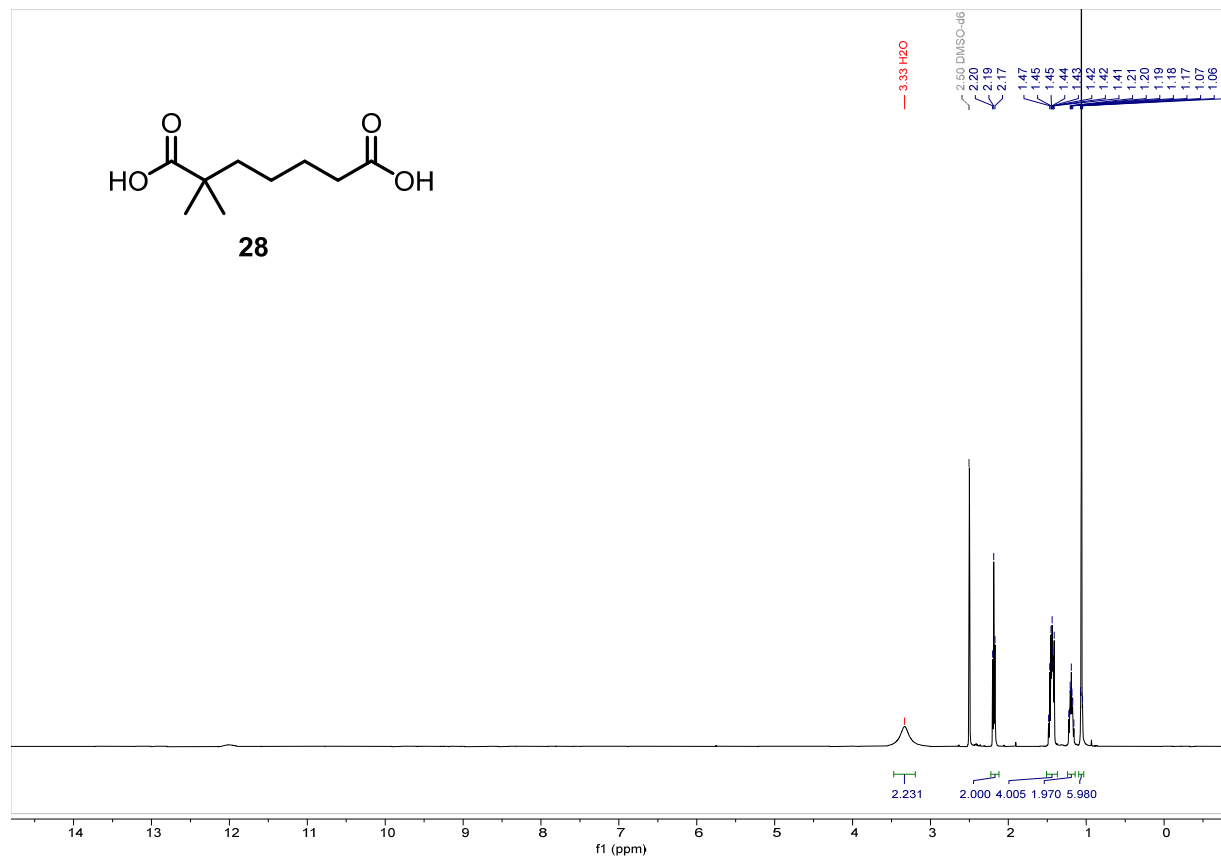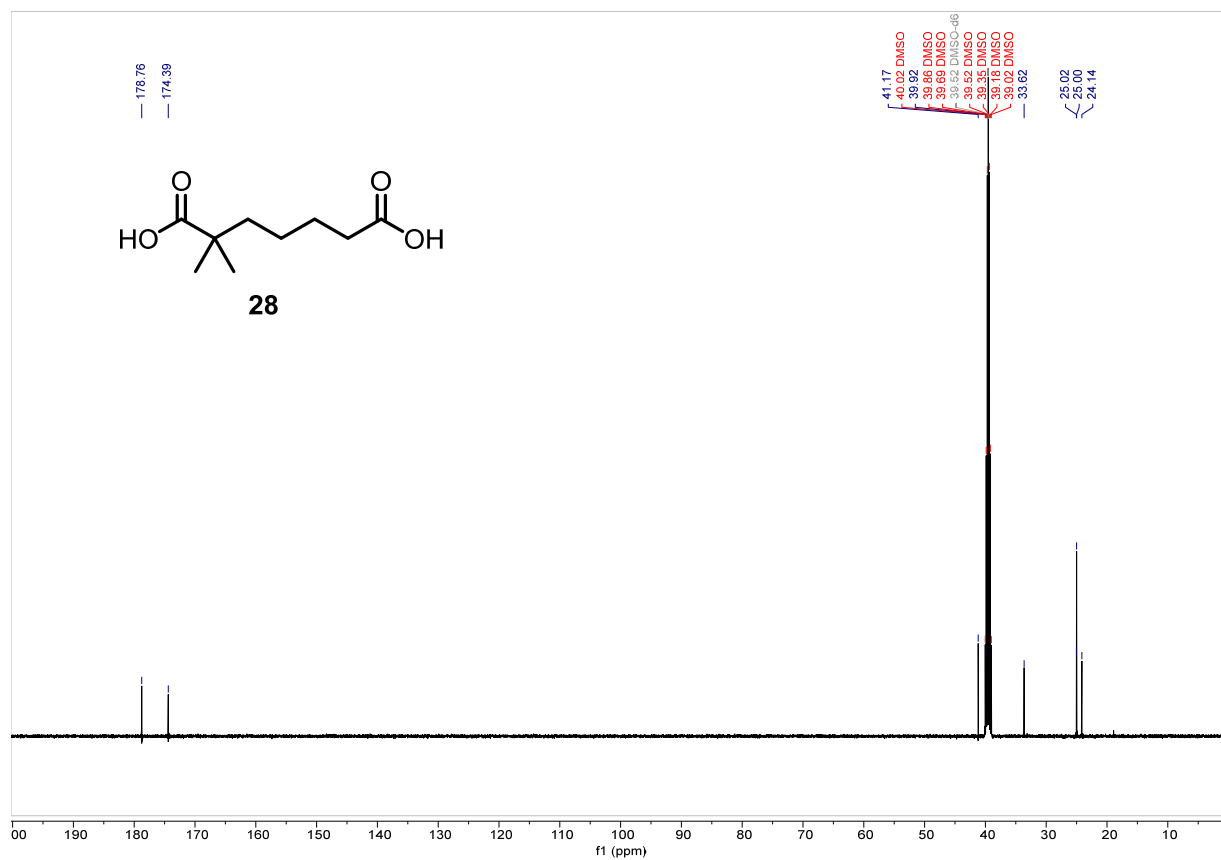

### 3-Methylheptanedioic acid 29

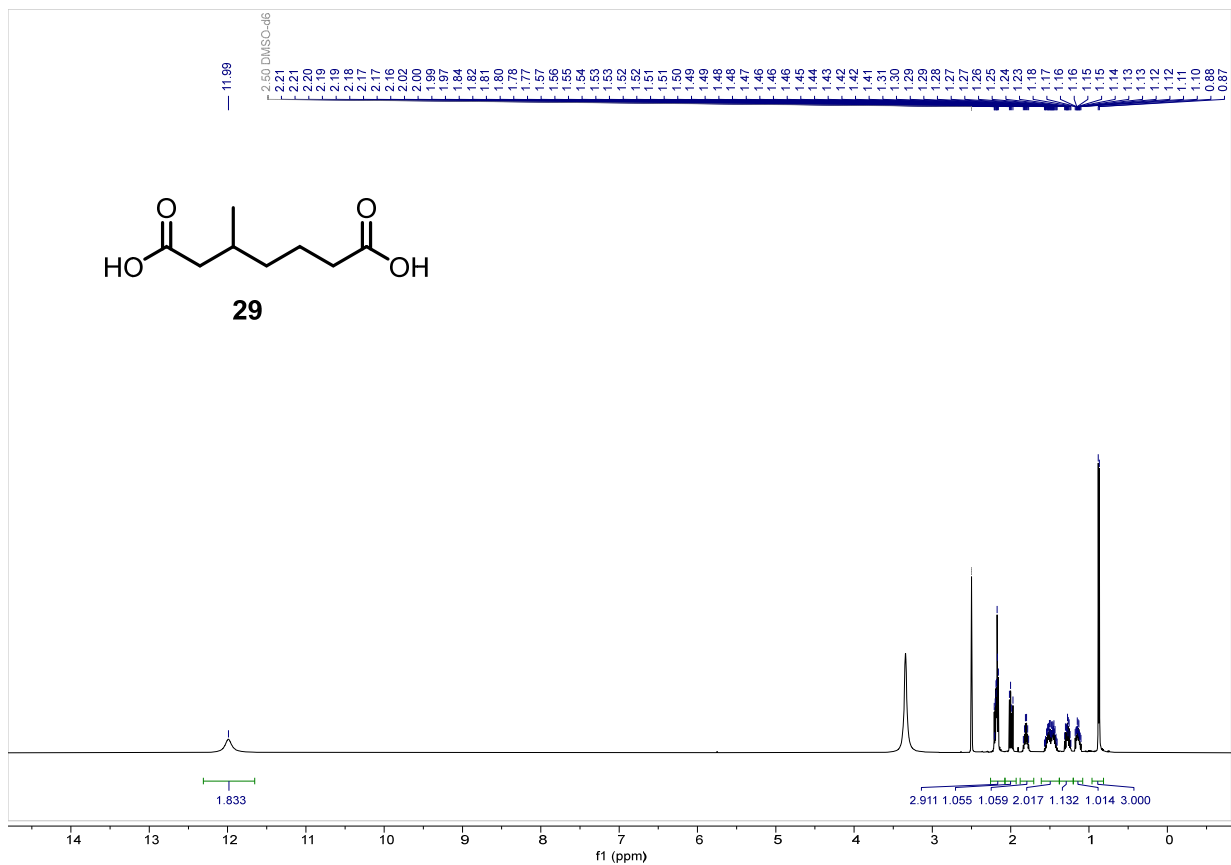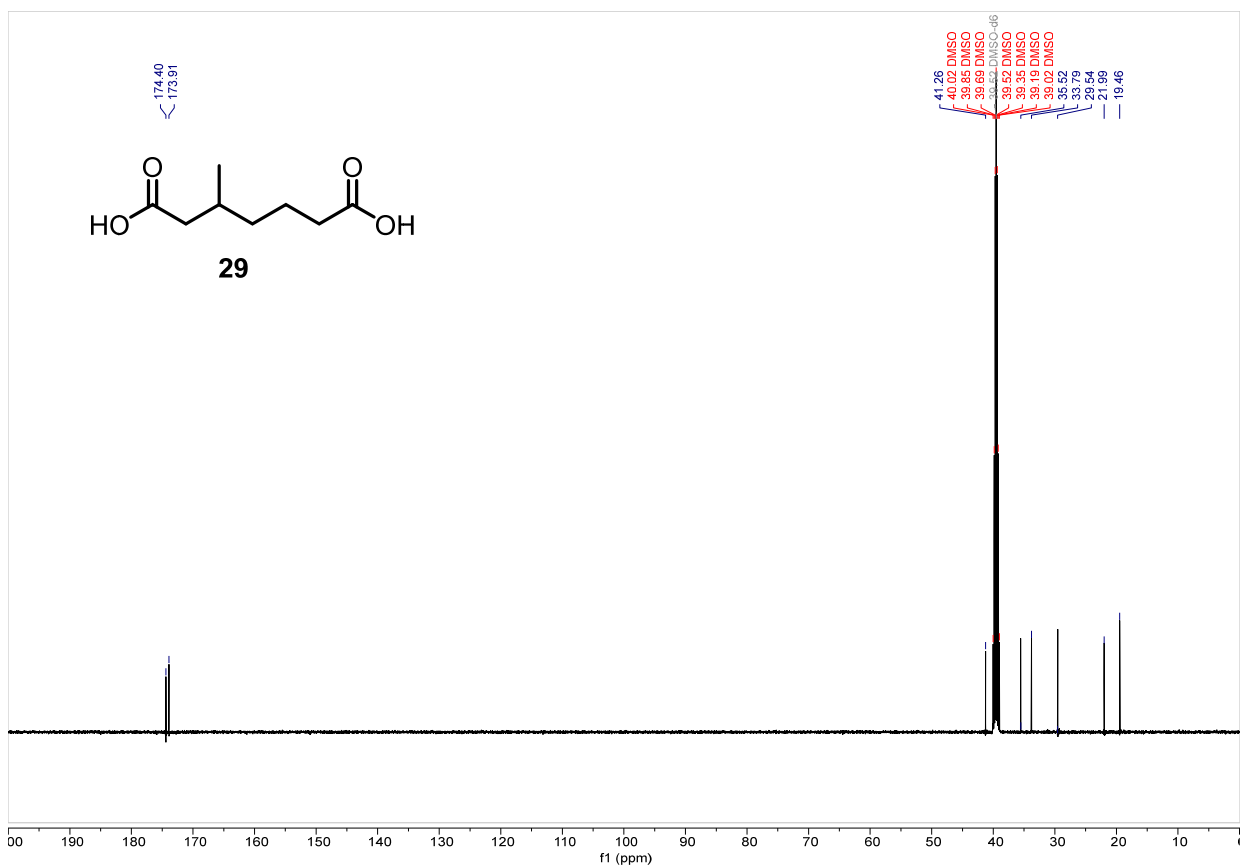

### 3-Isopropylheptanedioic acid 30

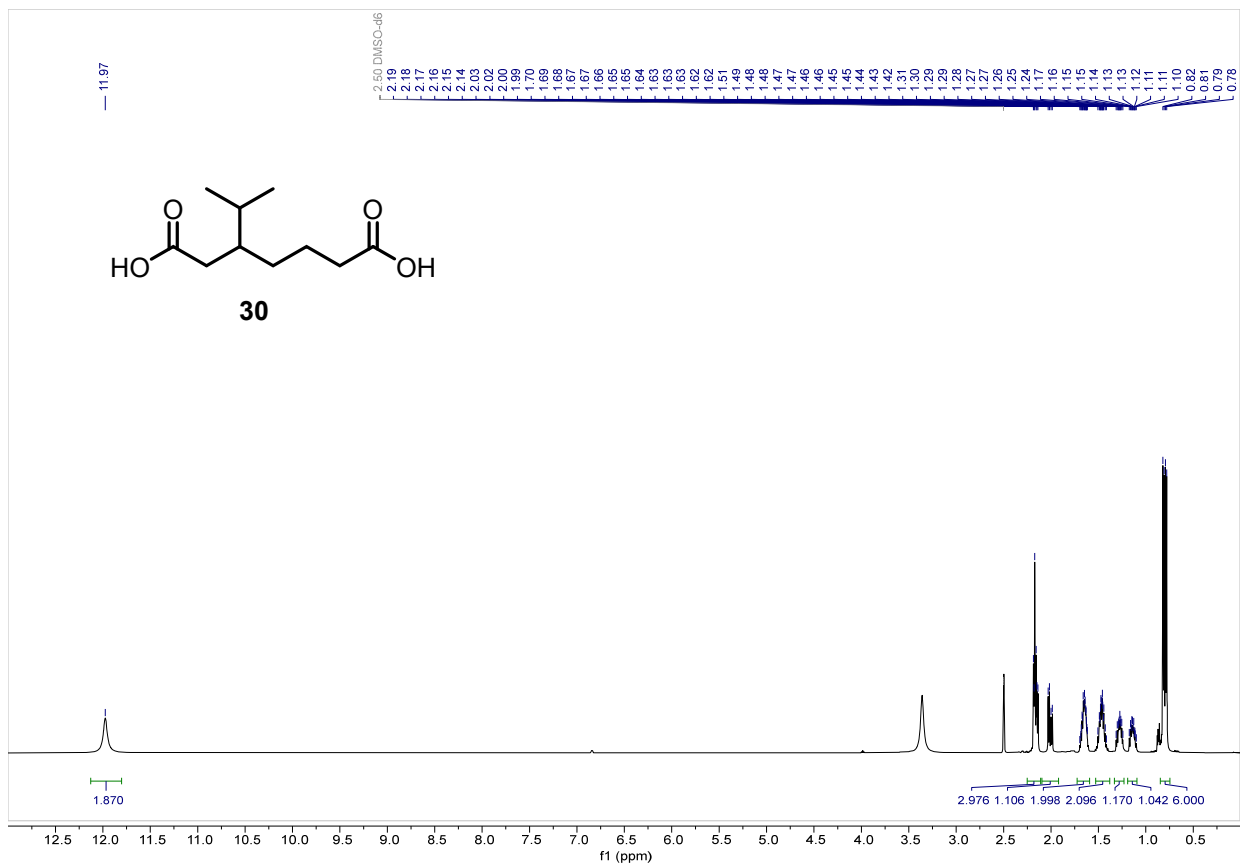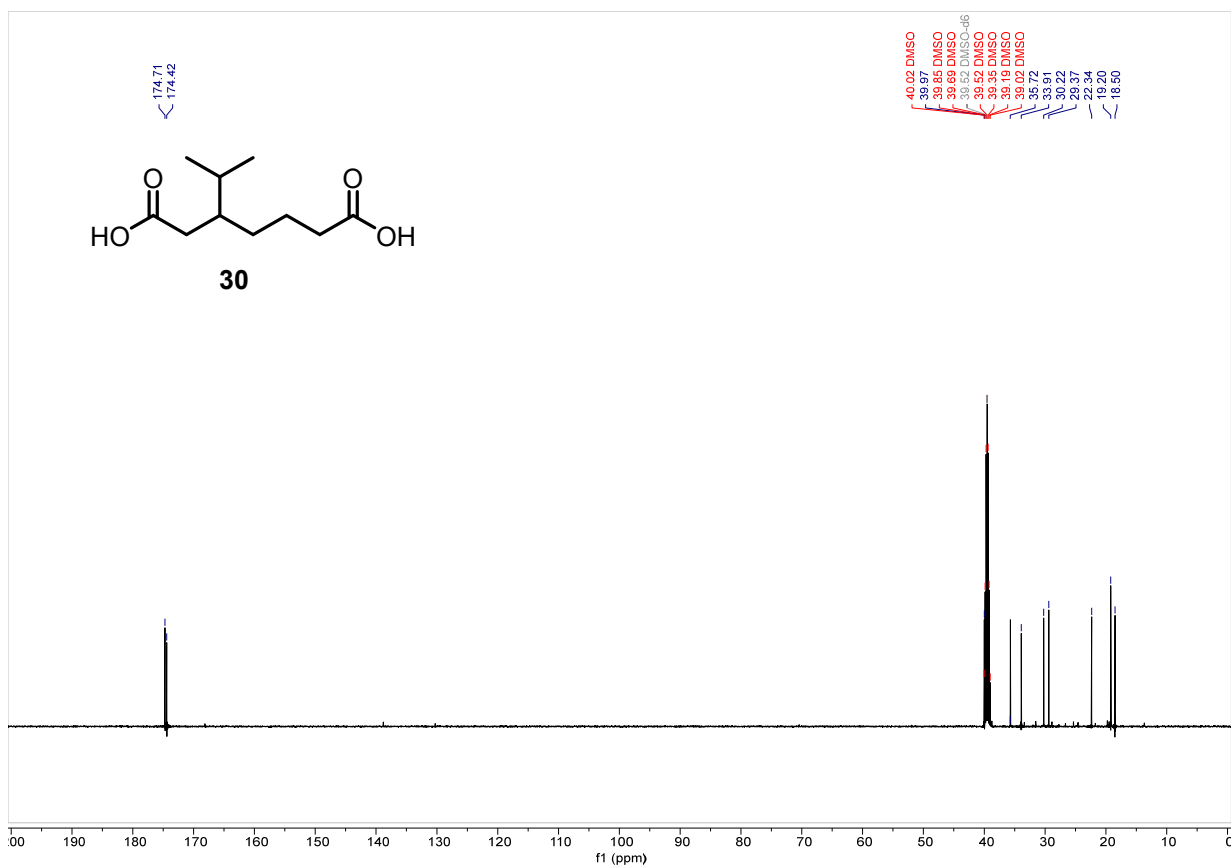

### 3-(*tert*-Butyl)heptanedioic acid **31**

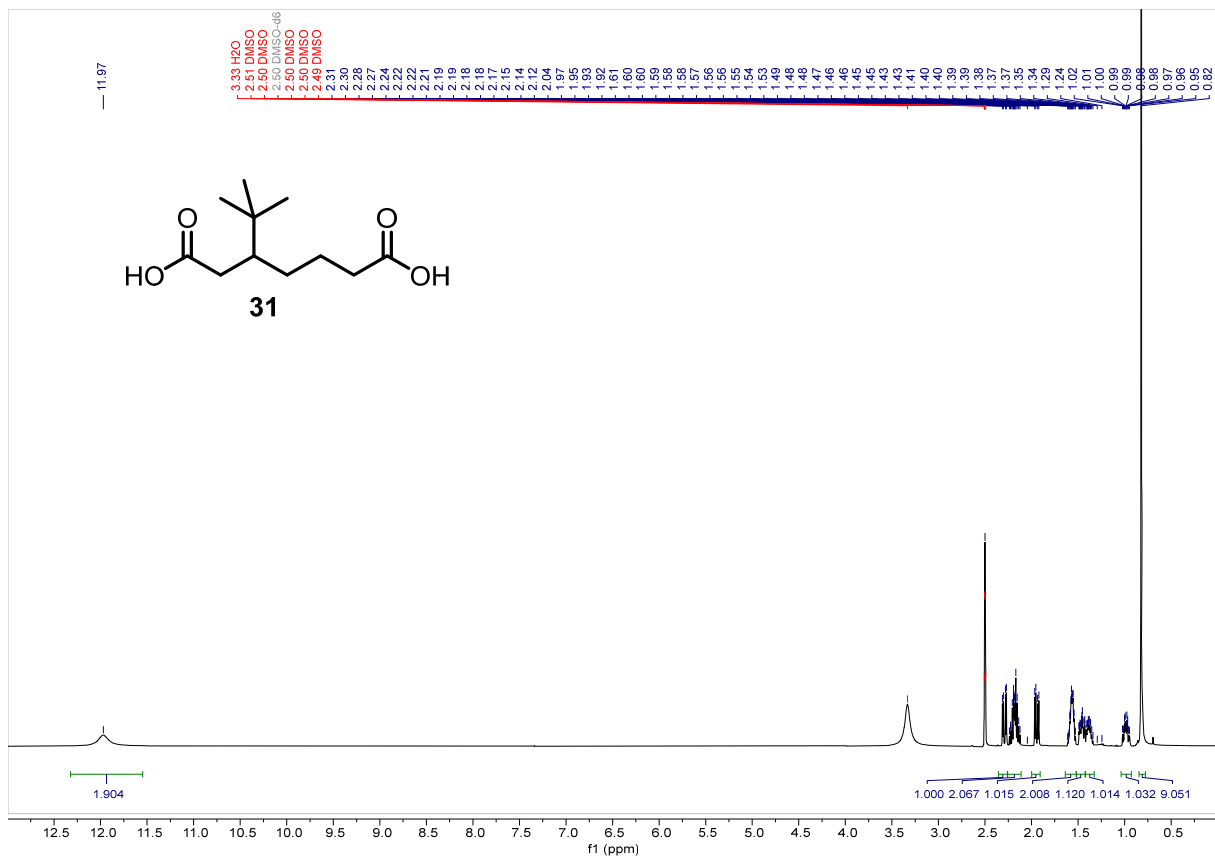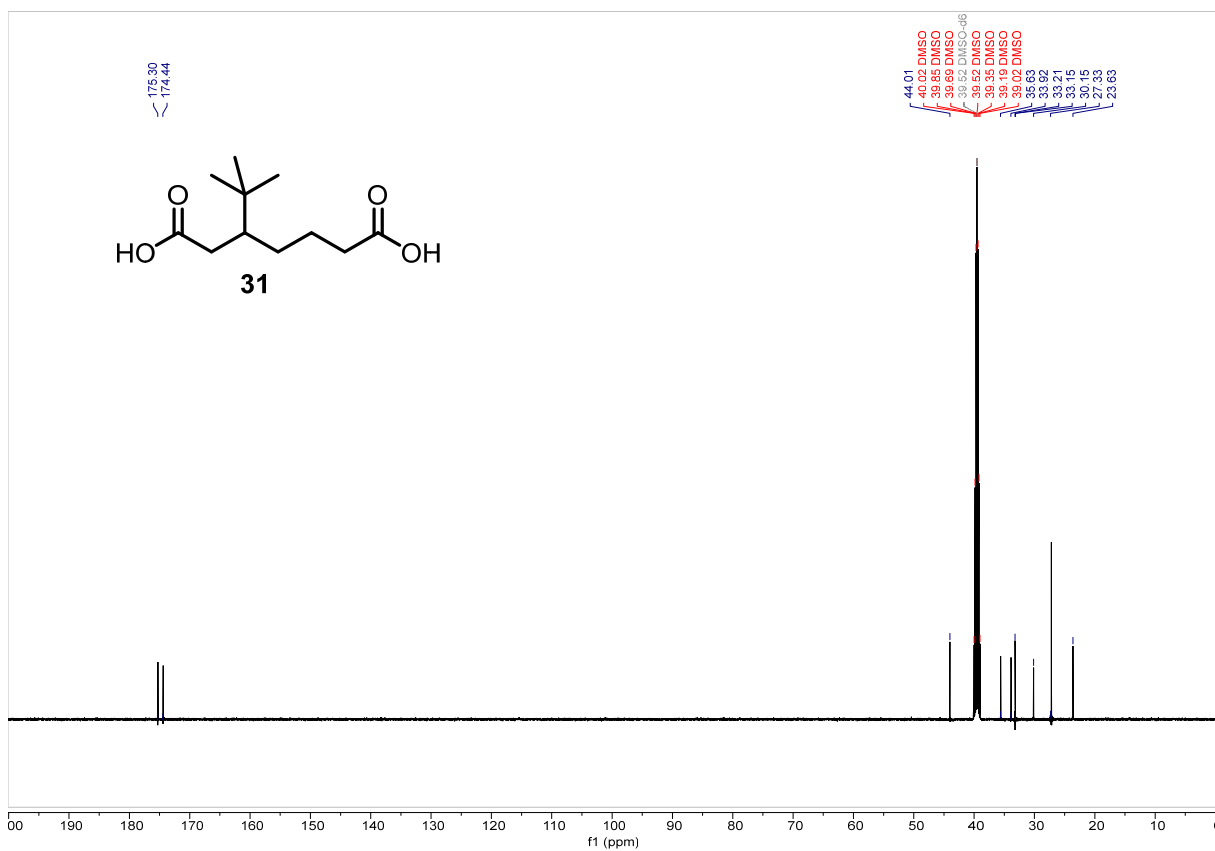



### 3-(4,4-Dimethyl-5-oxotetrahydrofuran-2-yl)-2,2-dimethylpropanoic acid 50b

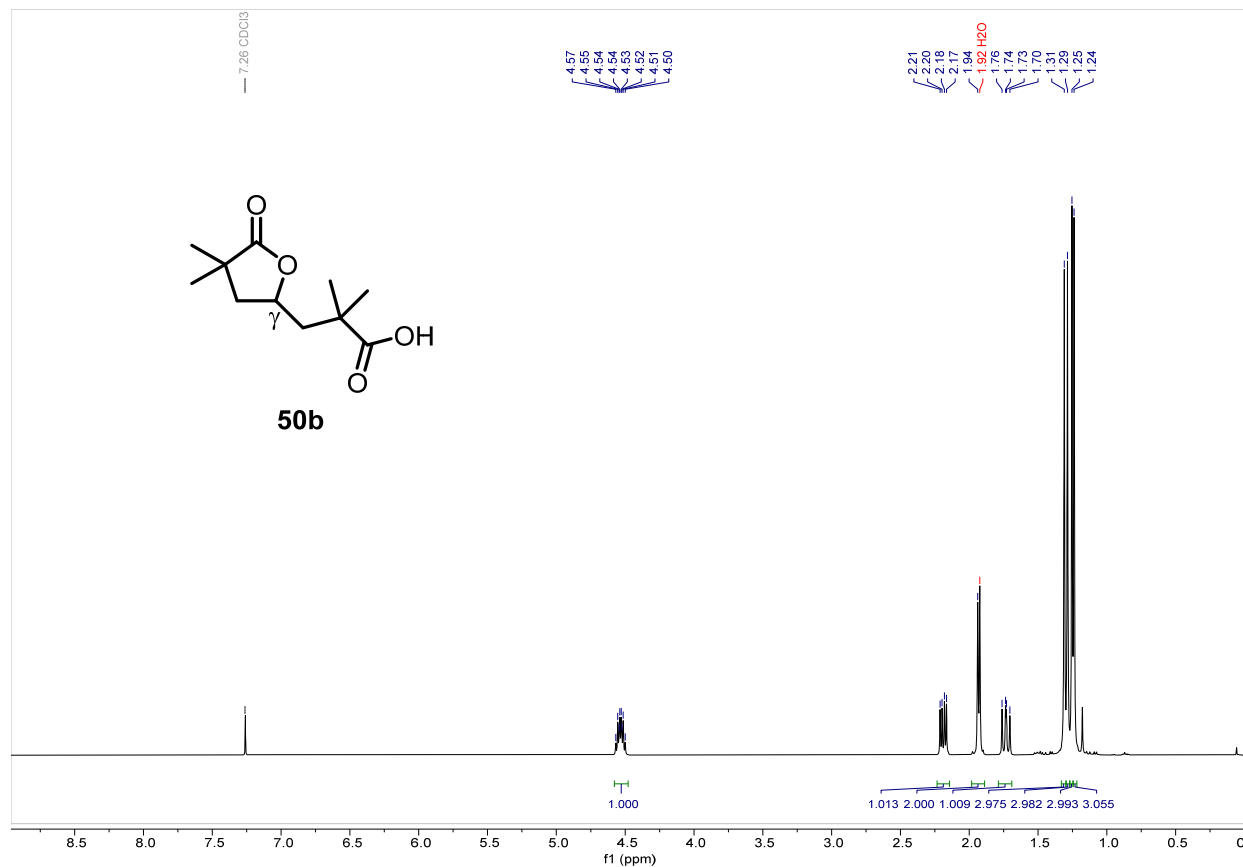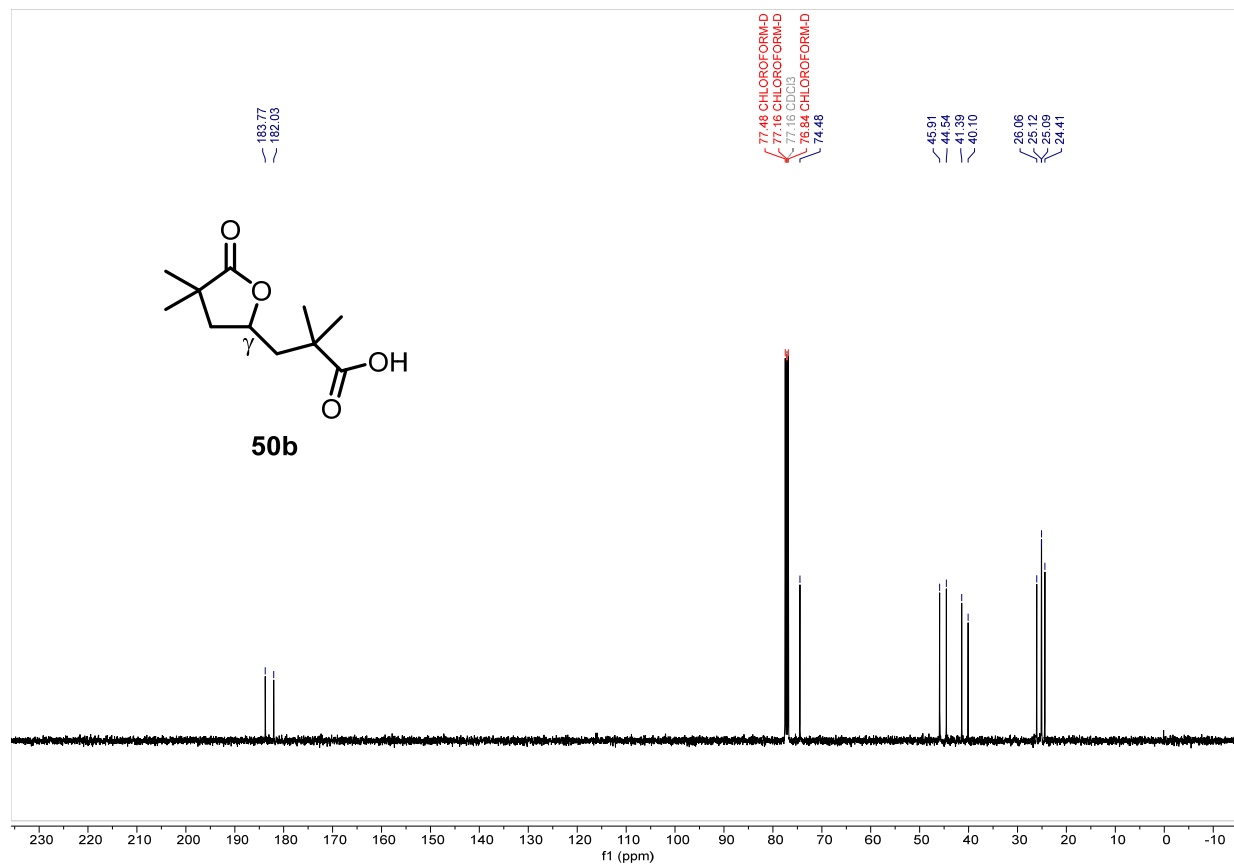

### 3-(4,4-Dimethyl-5-oxotetrahydrofuran-2-yl)propanoic acid 28b

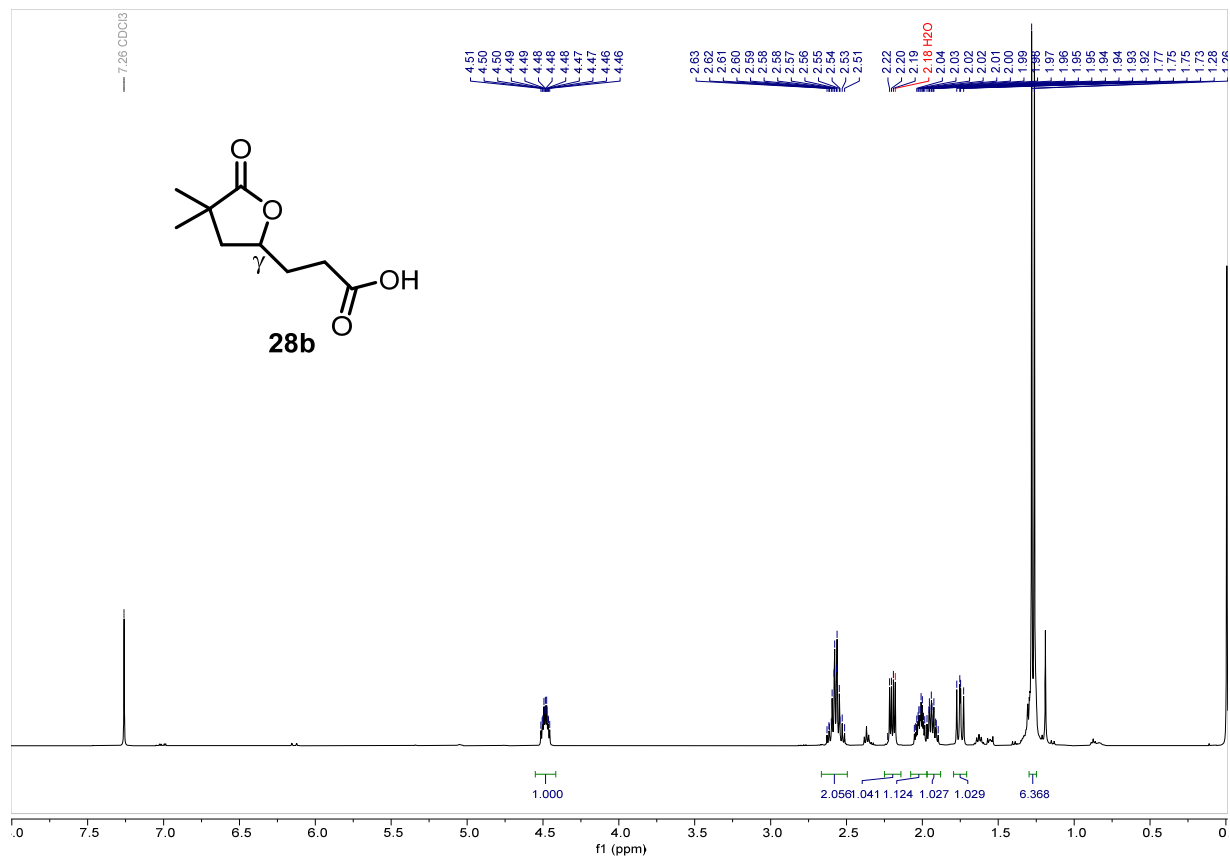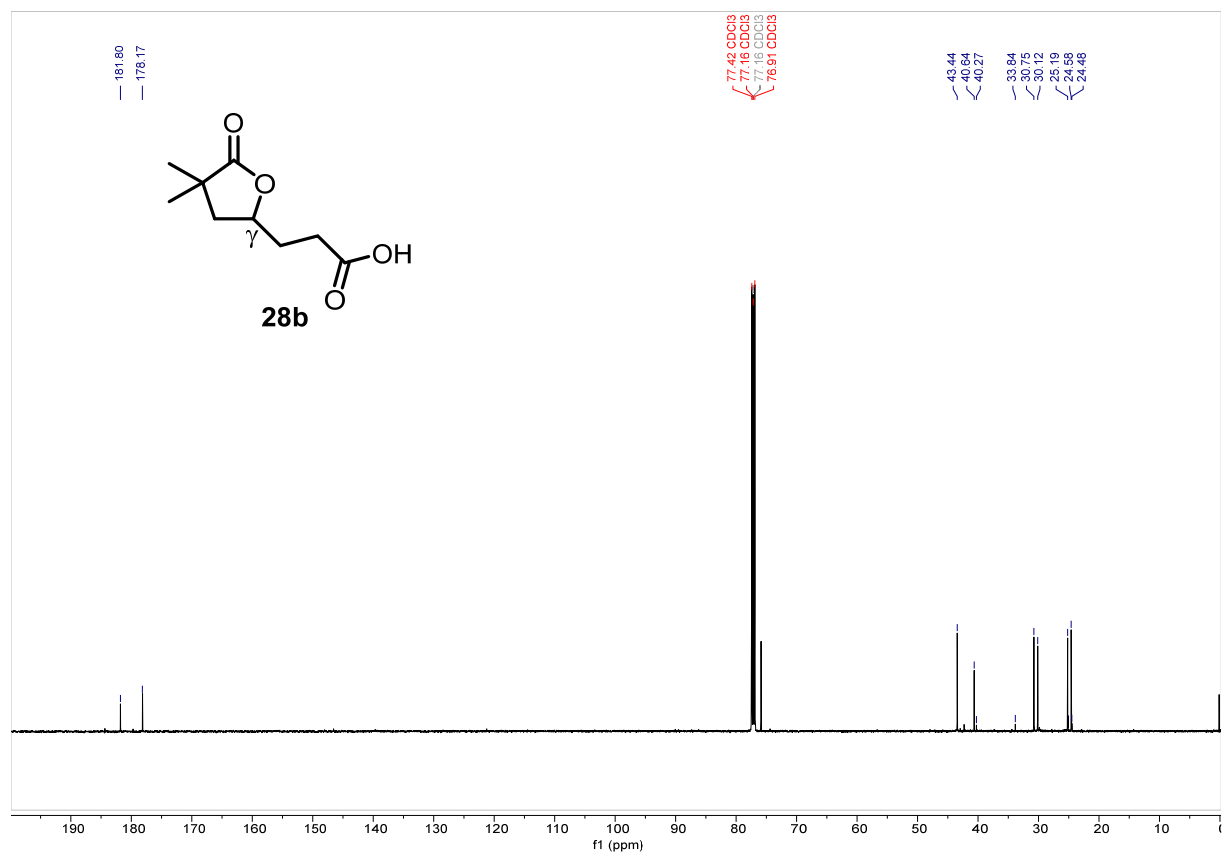

### 3-(4-Methyl-5-oxotetrahydrofuran-2-yl)propanoic acid 46b

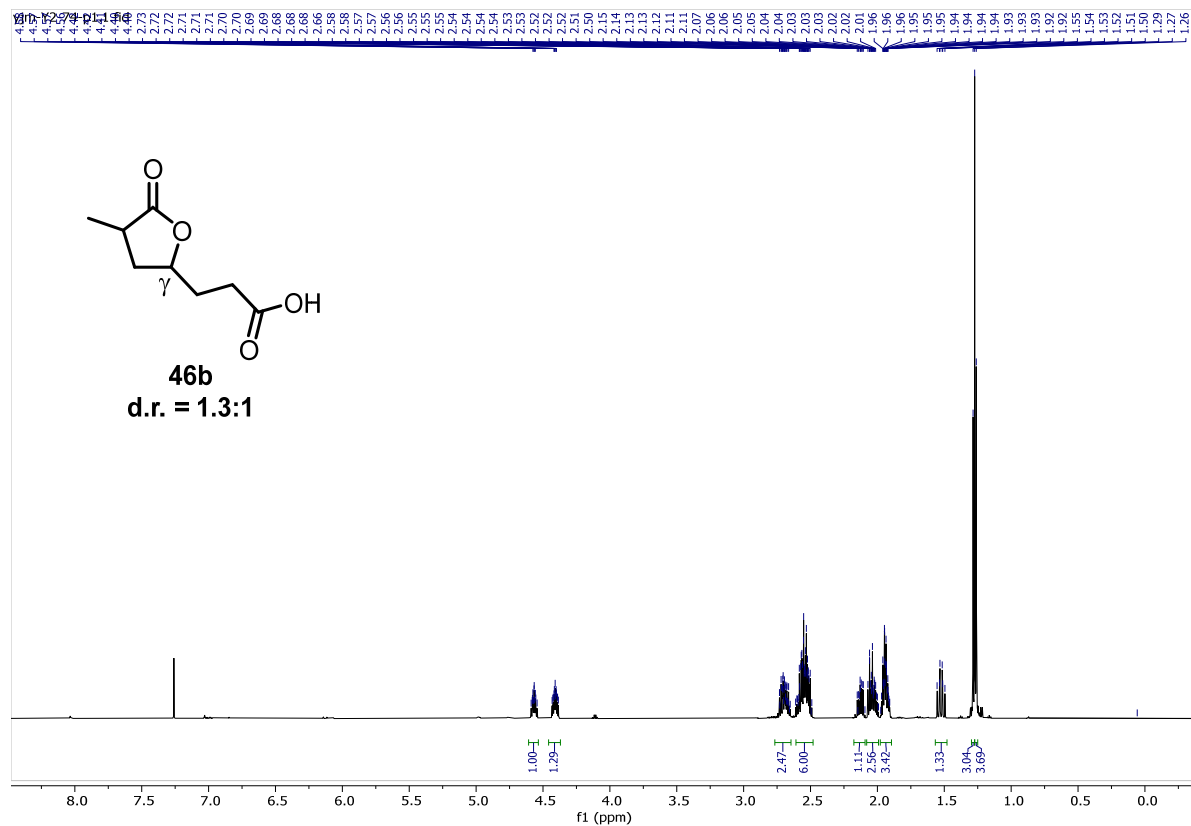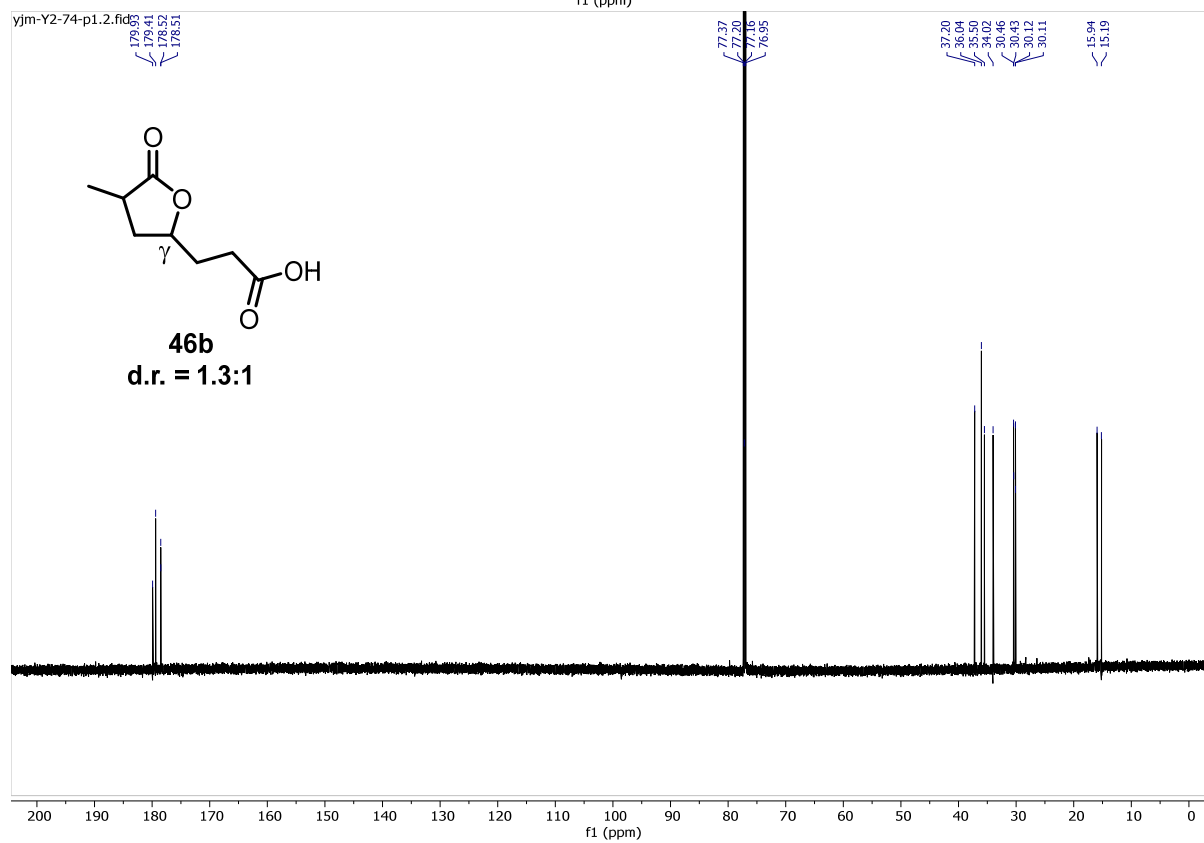

### 3-(4-Ethyl-5-oxotetrahydrofuran-2-yl)propanoic acid 26b

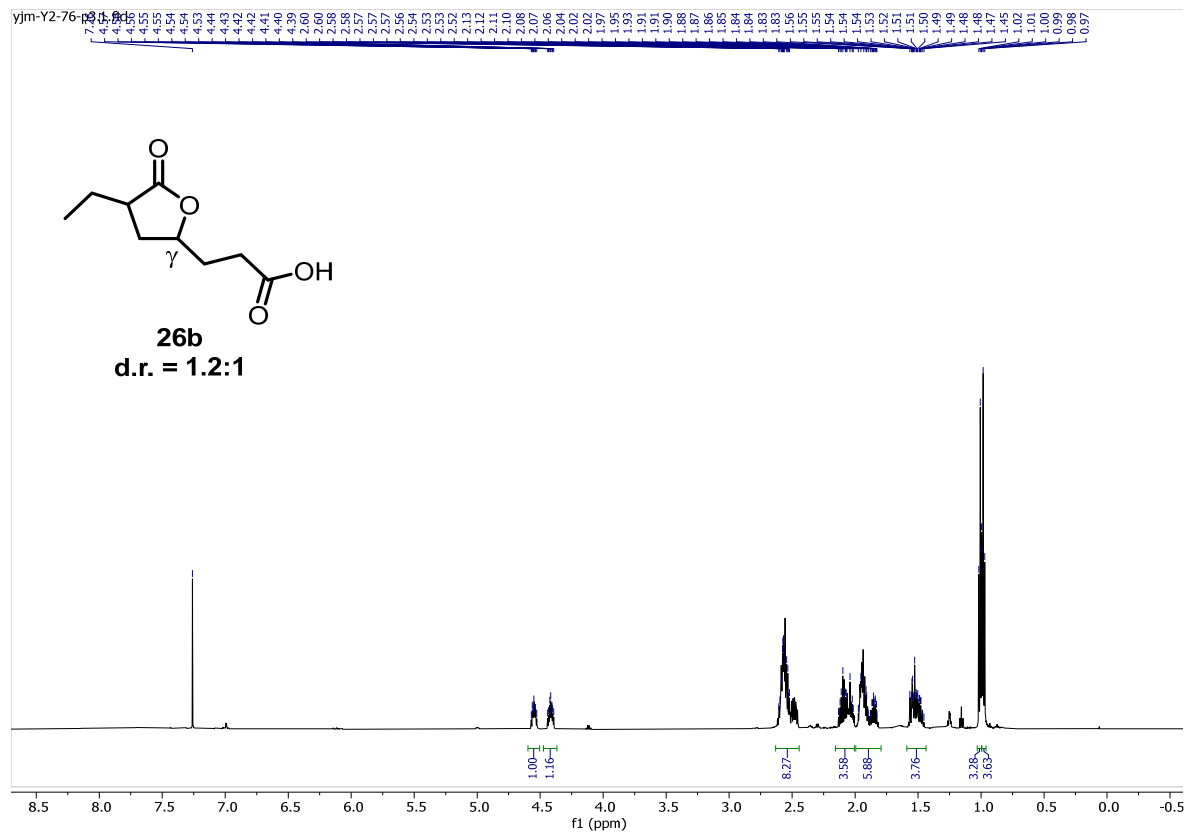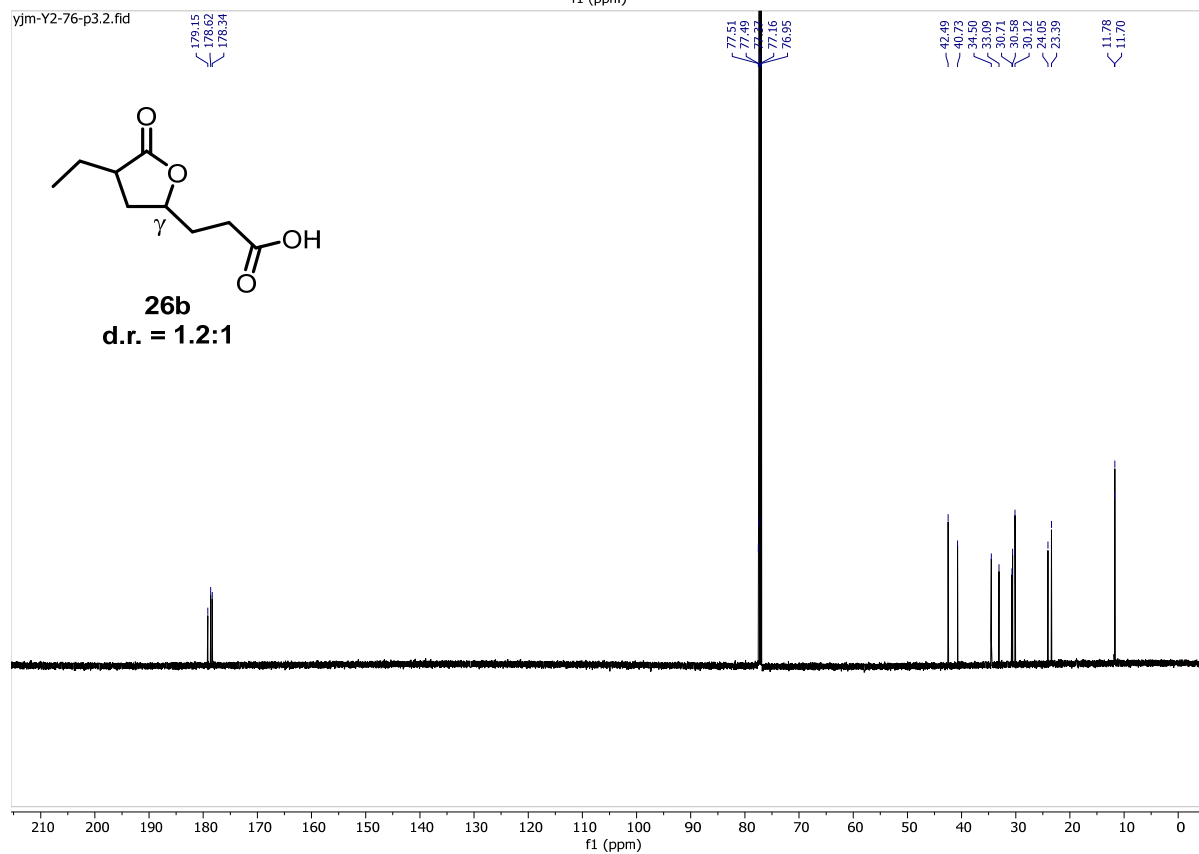

### 3-(4-Isopropyl-5-oxotetrahydrofuran-2-yl)propanoic acid 27b

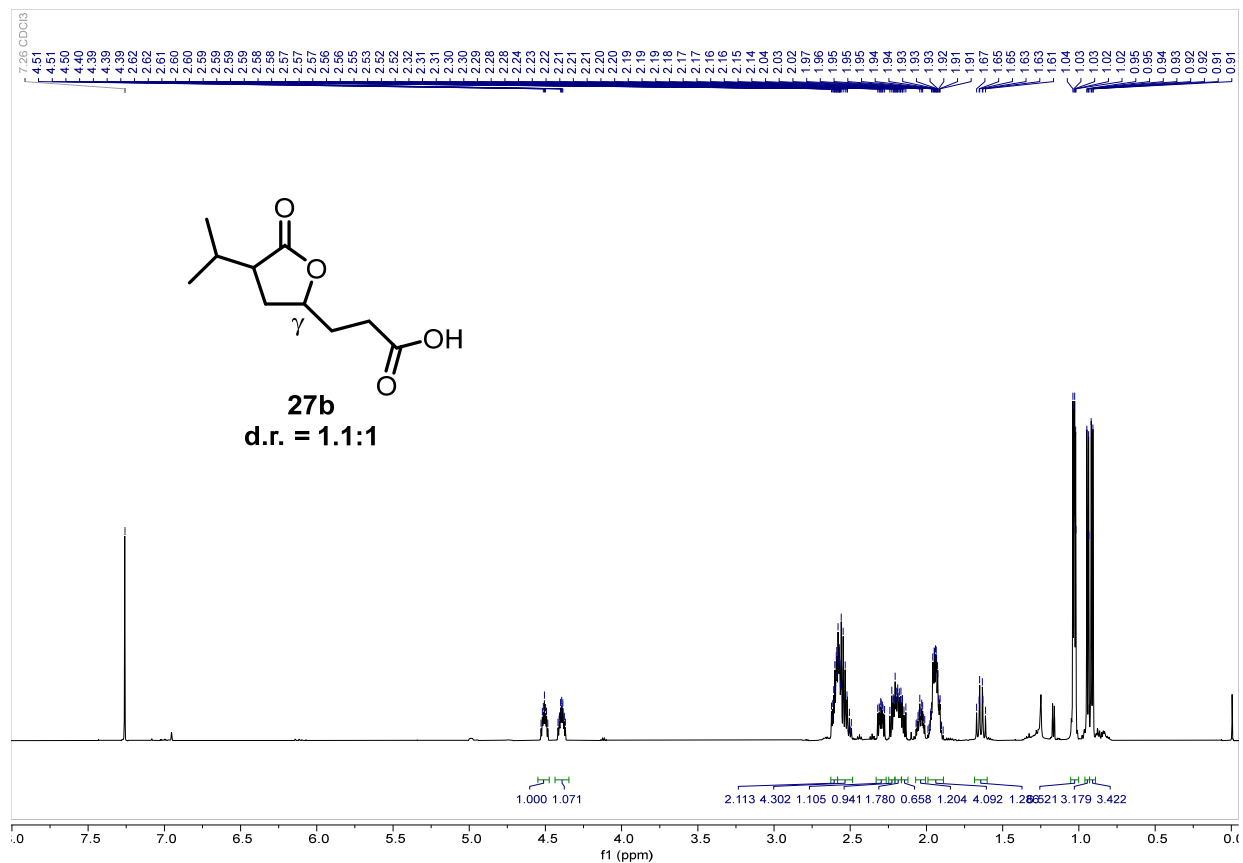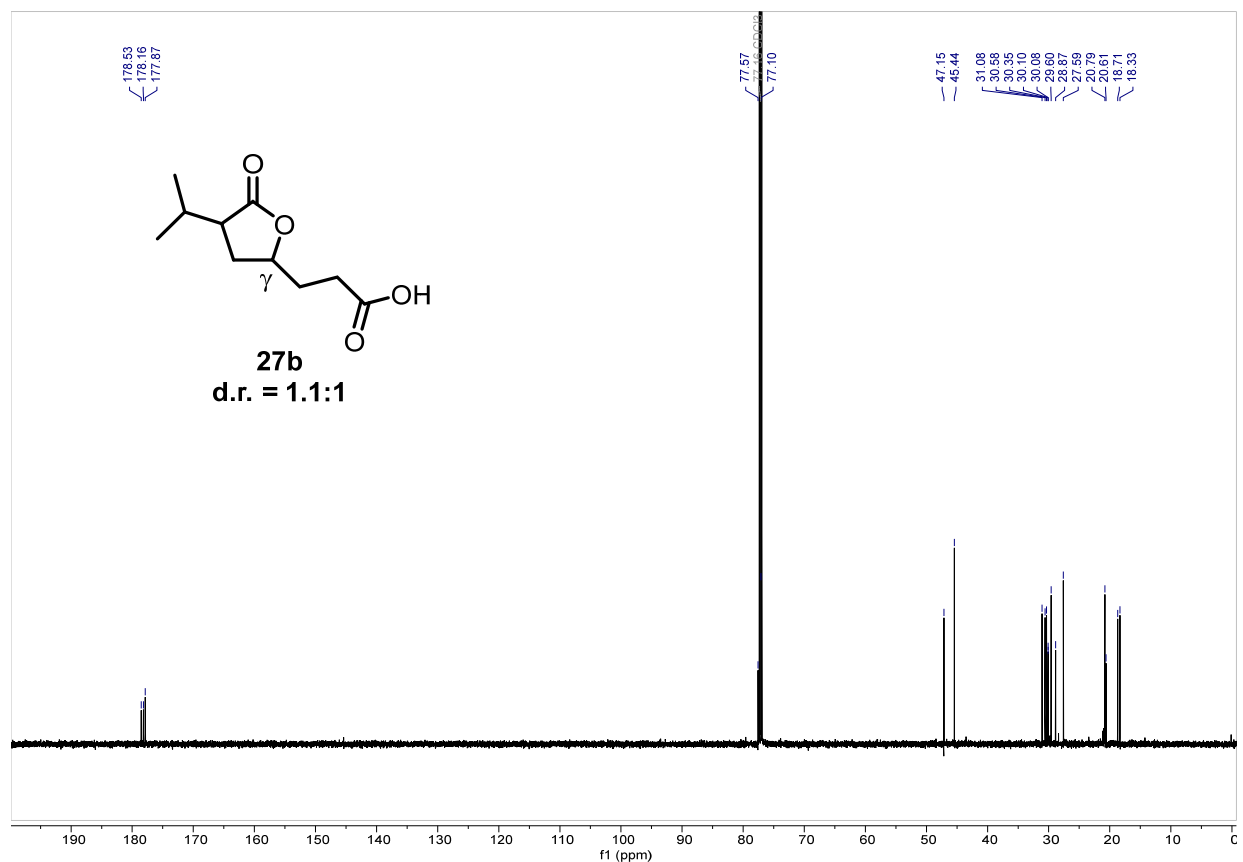

### 3-(4-Benzyl-5-oxotetrahydrofuran-2-yl)propanoic acid 47b

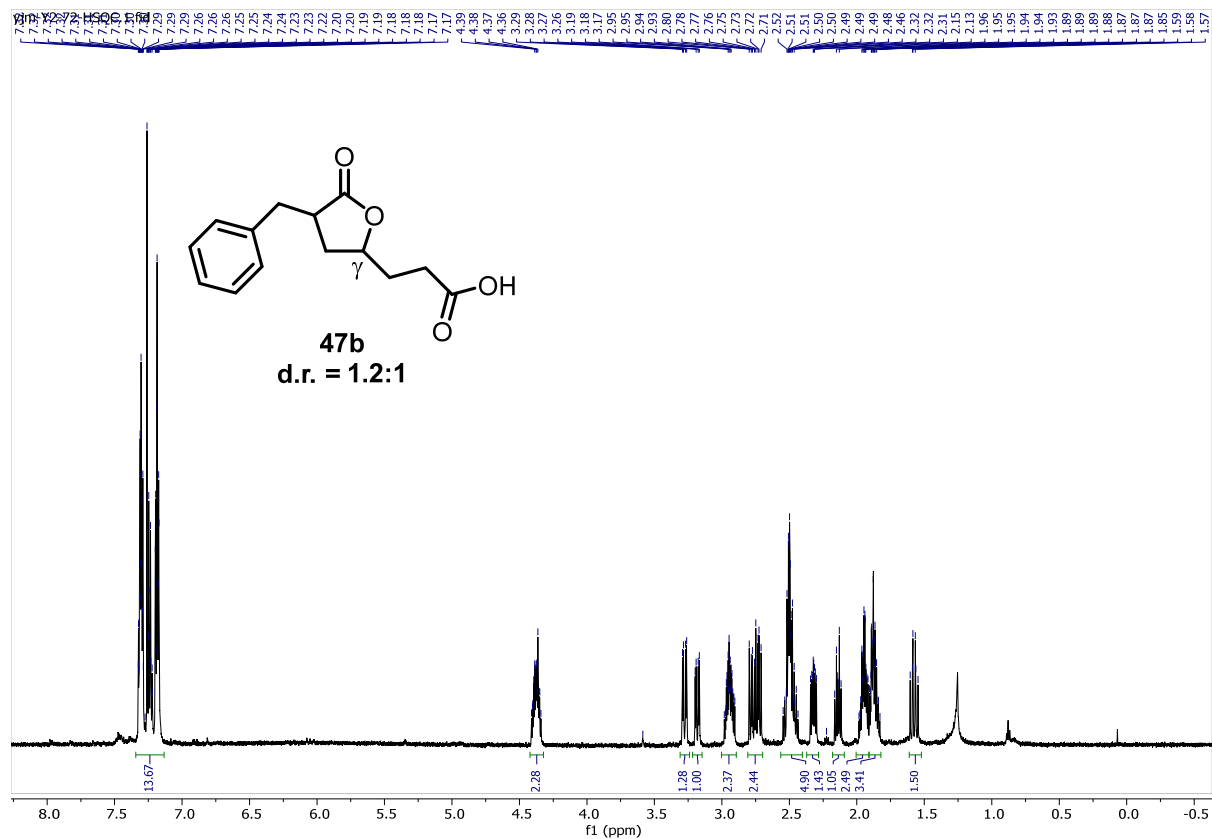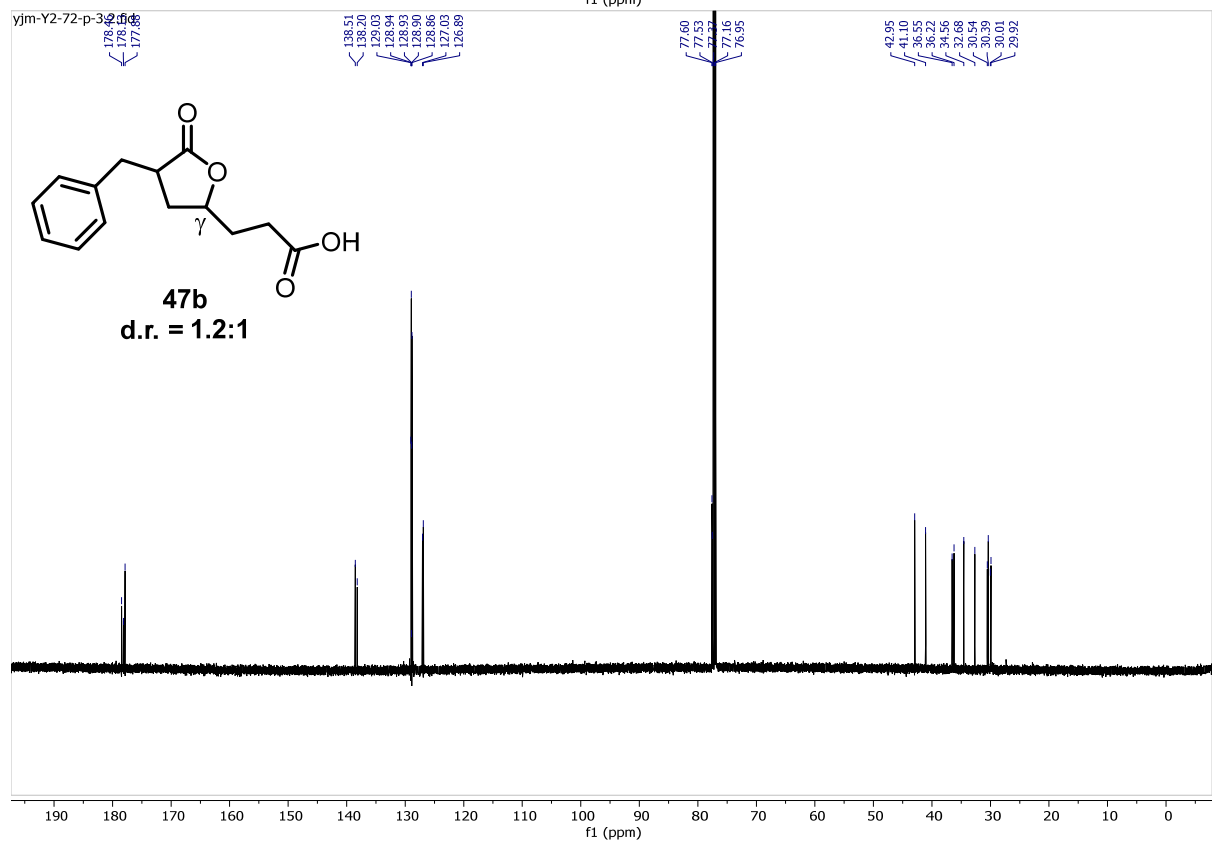

# Benzyl 3-(4-(*tert*-butyl)-5-oxotetrahydrofuran-2-yl)propanoate 48b

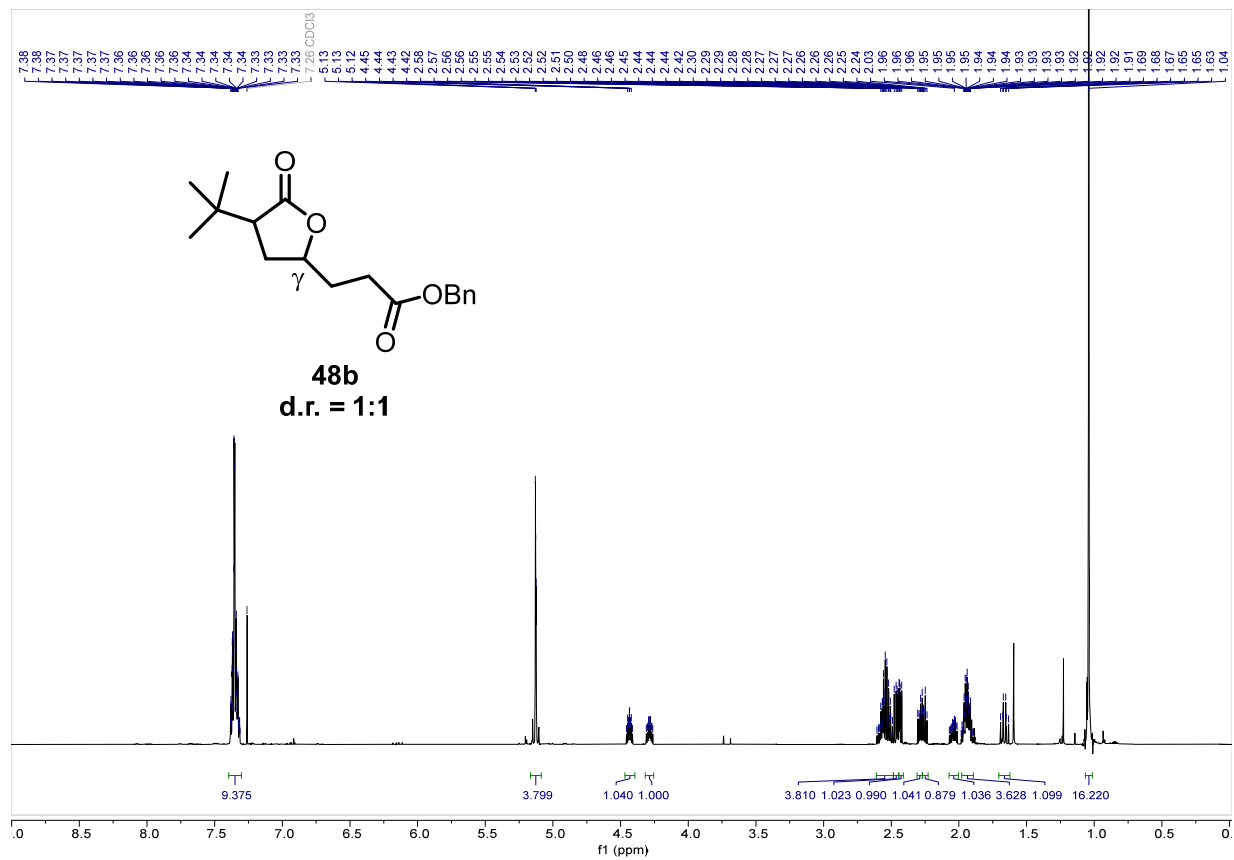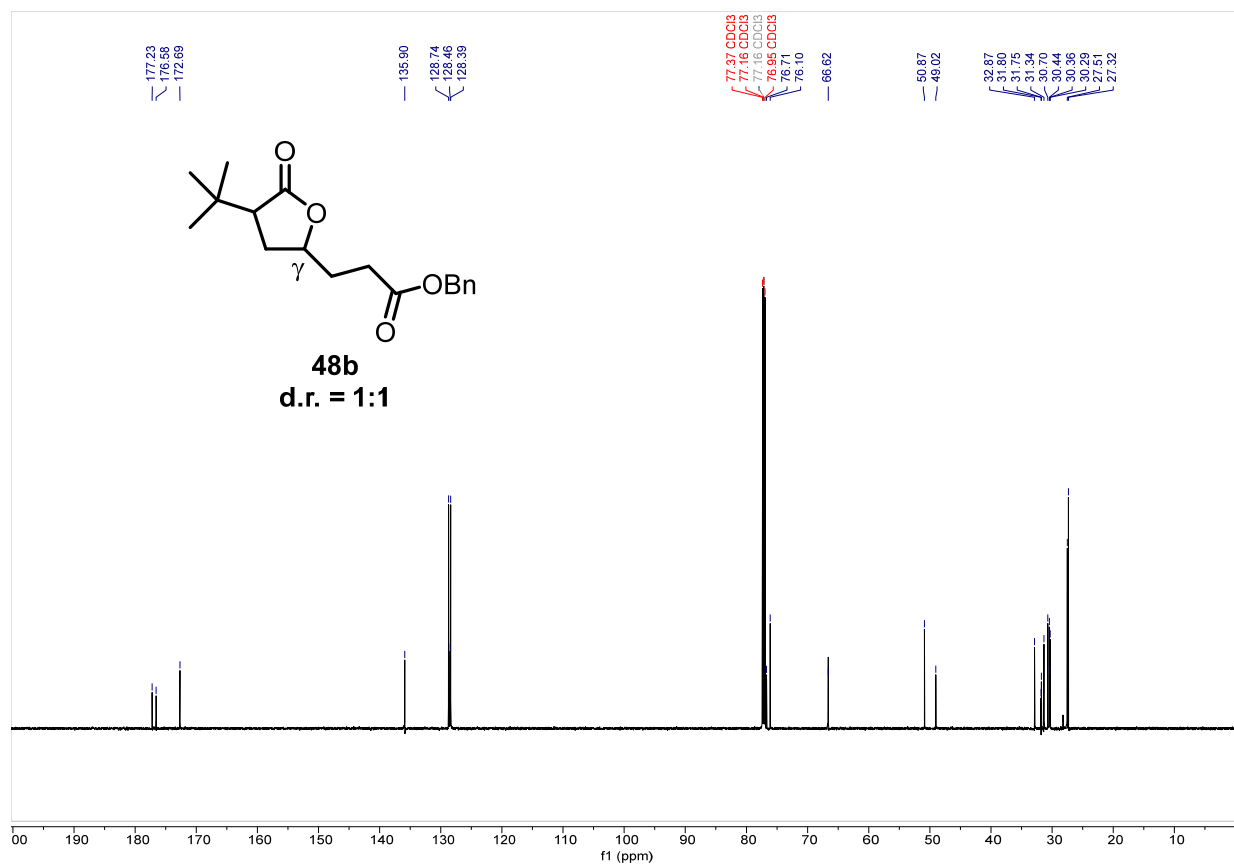

### 3-(5-Oxotetrahydrofuran-2-yl)propanoic acid **2b**

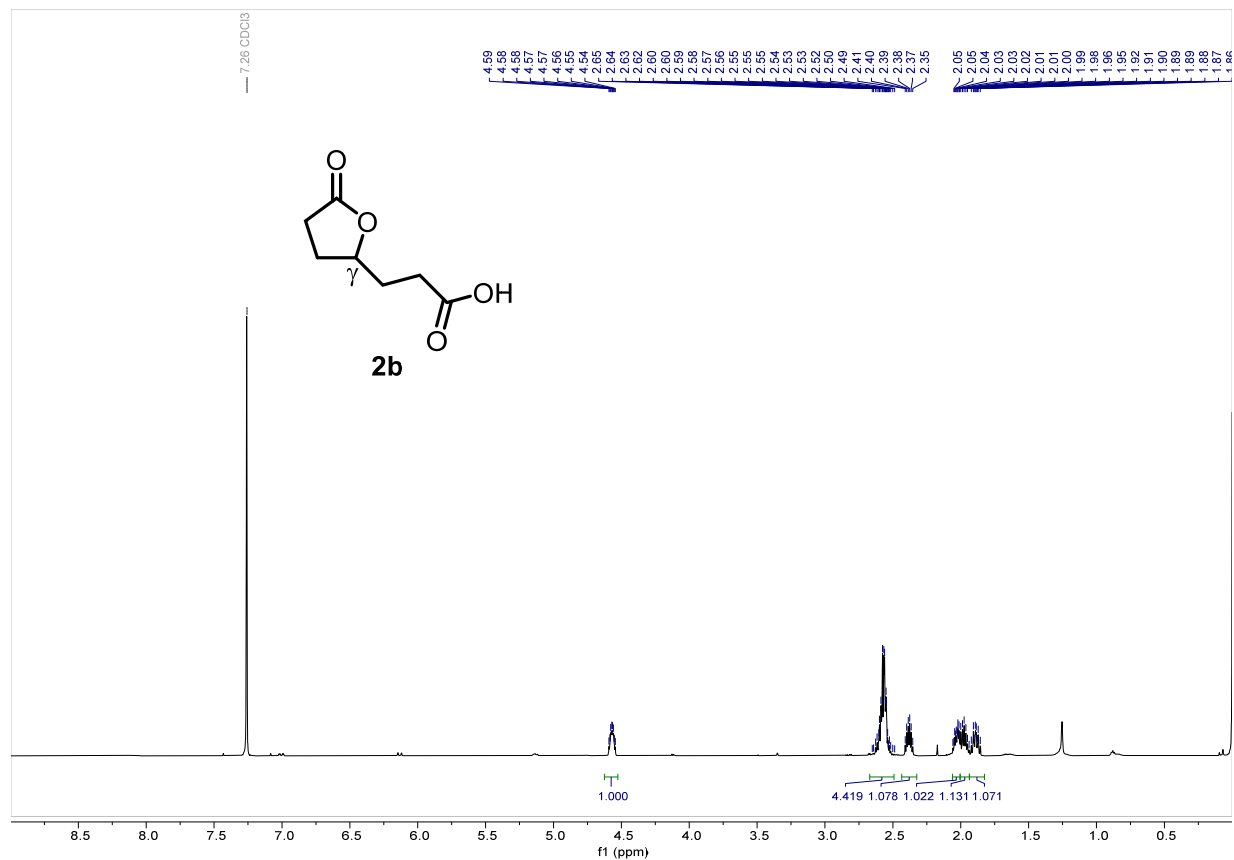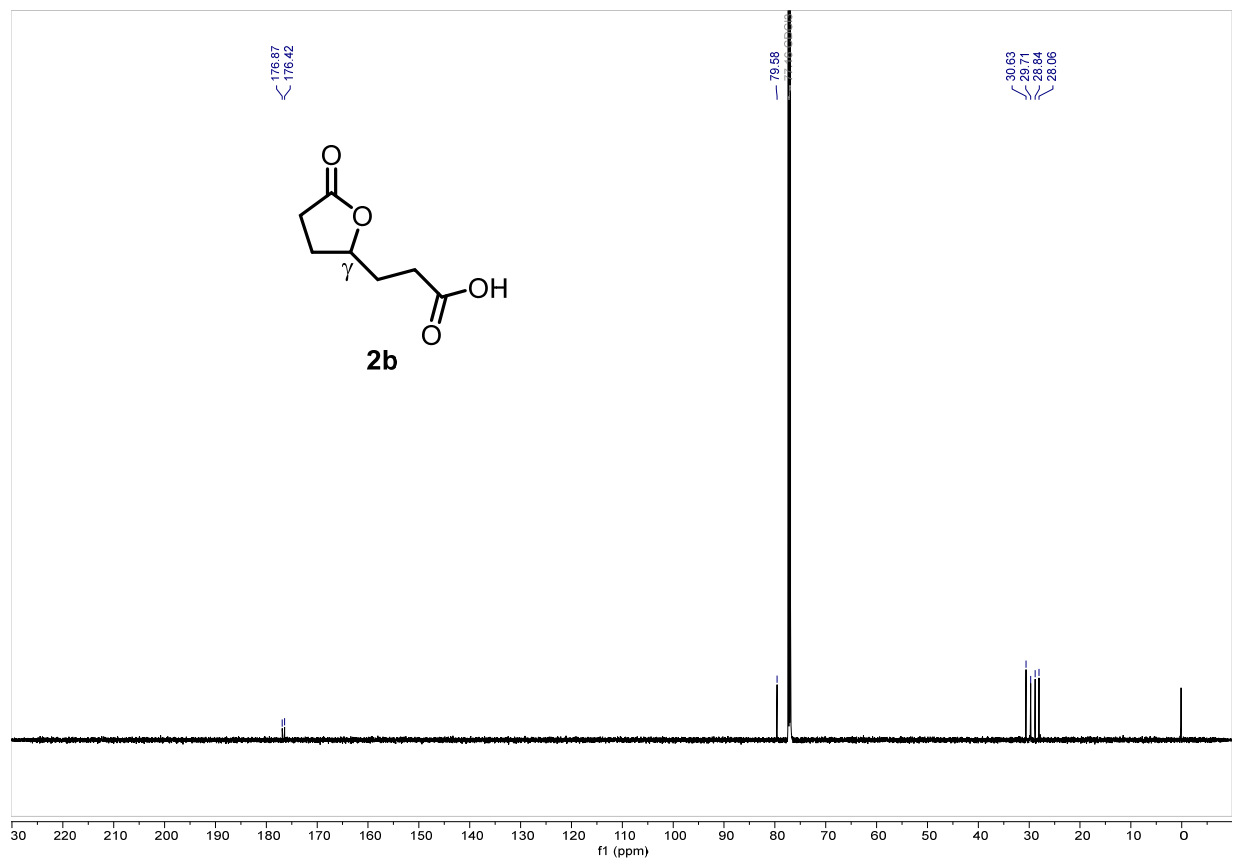



### 3-(5-Oxo-6-oxaspiro[3.4]octan-7-yl)propanoic acid 49b

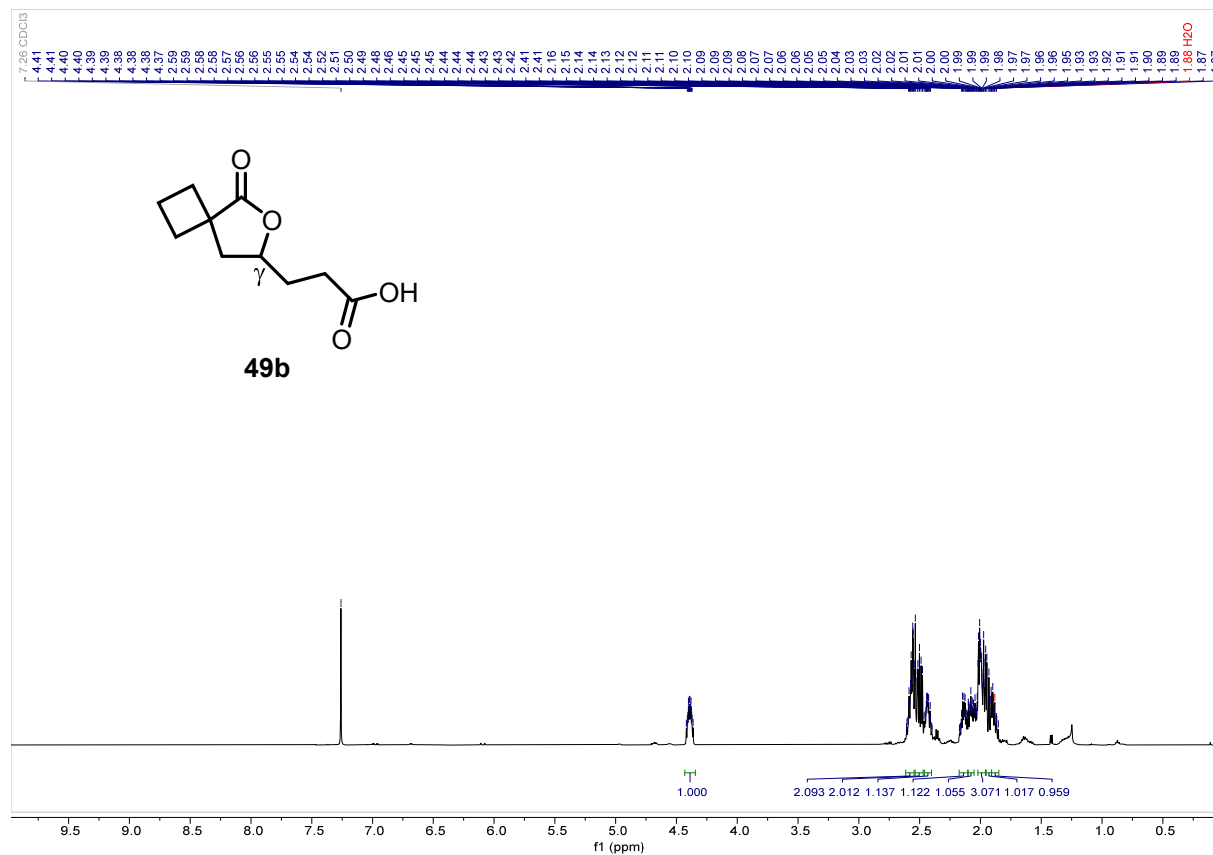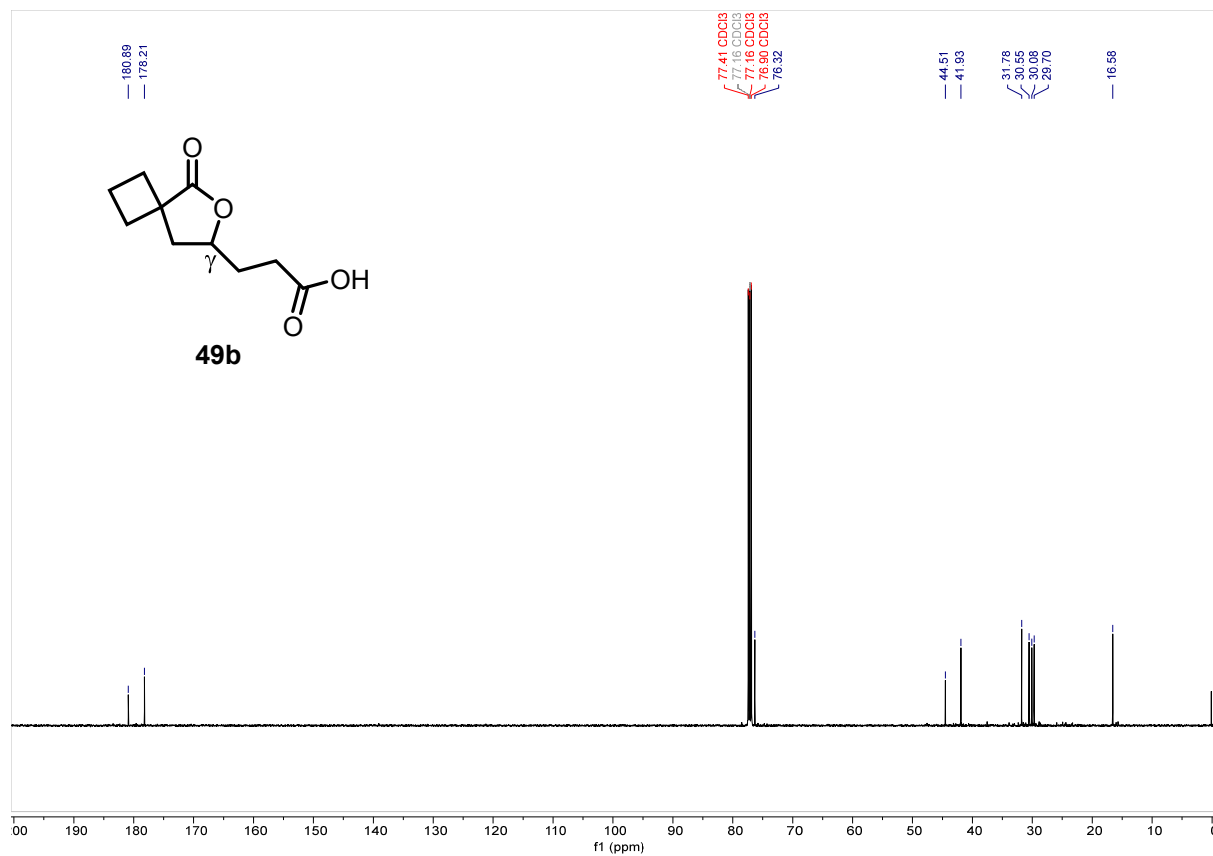

# Benzyl 3-((2*S*\*,3*S*\*)-3-isopropyl-5-oxotetrahydrofuran-2-yl)propanoate 30b

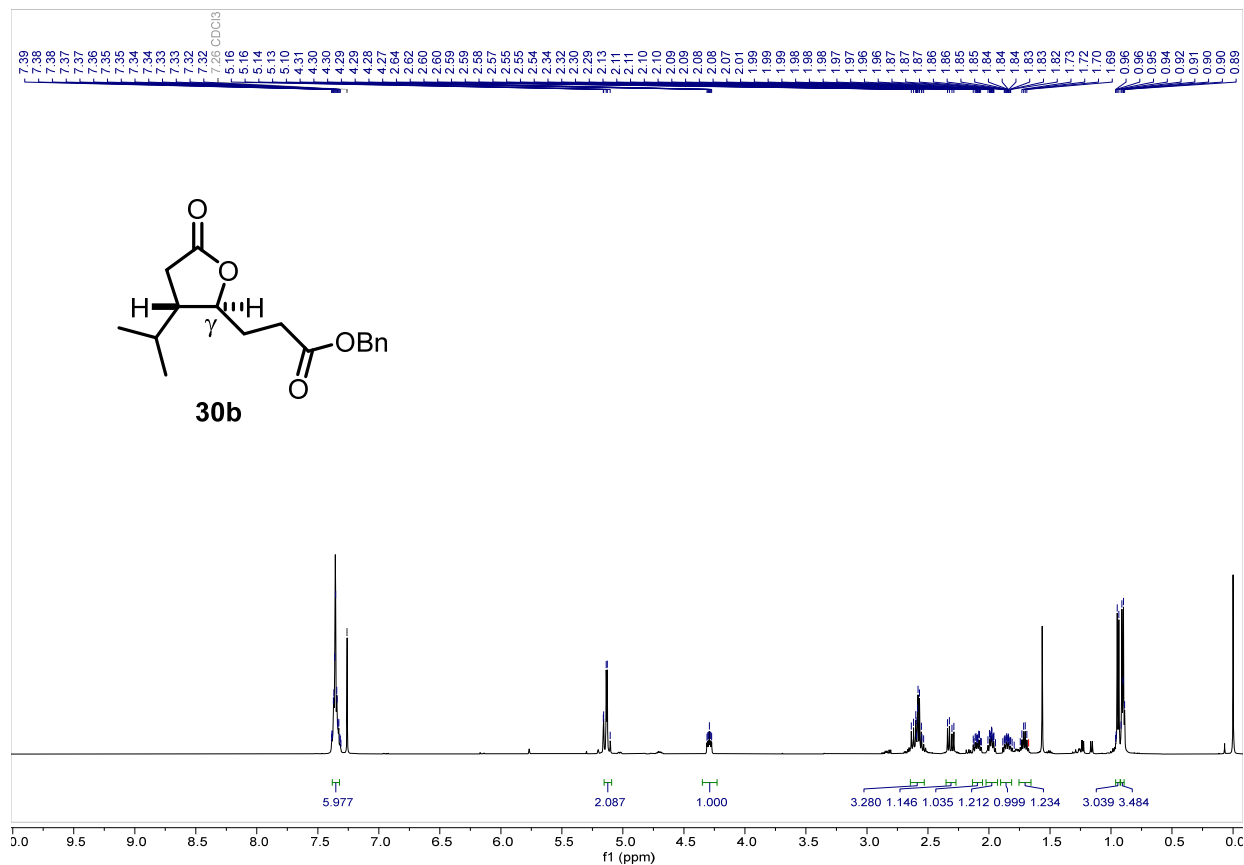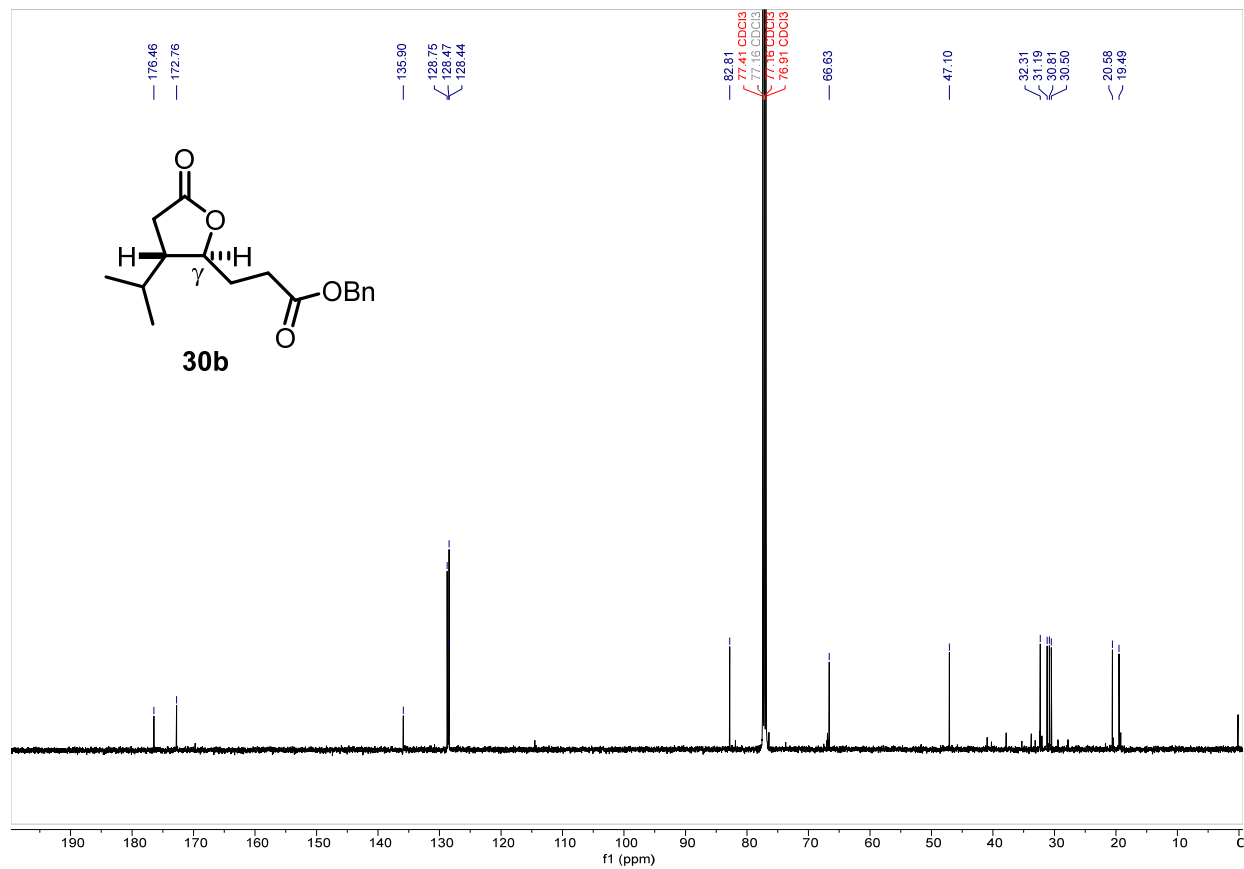

3-((2*S*\*,3*S*\*)-3-(tert-butyl)-5-oxotetrahydrofuran-2-yl)propanoic acid **31b**

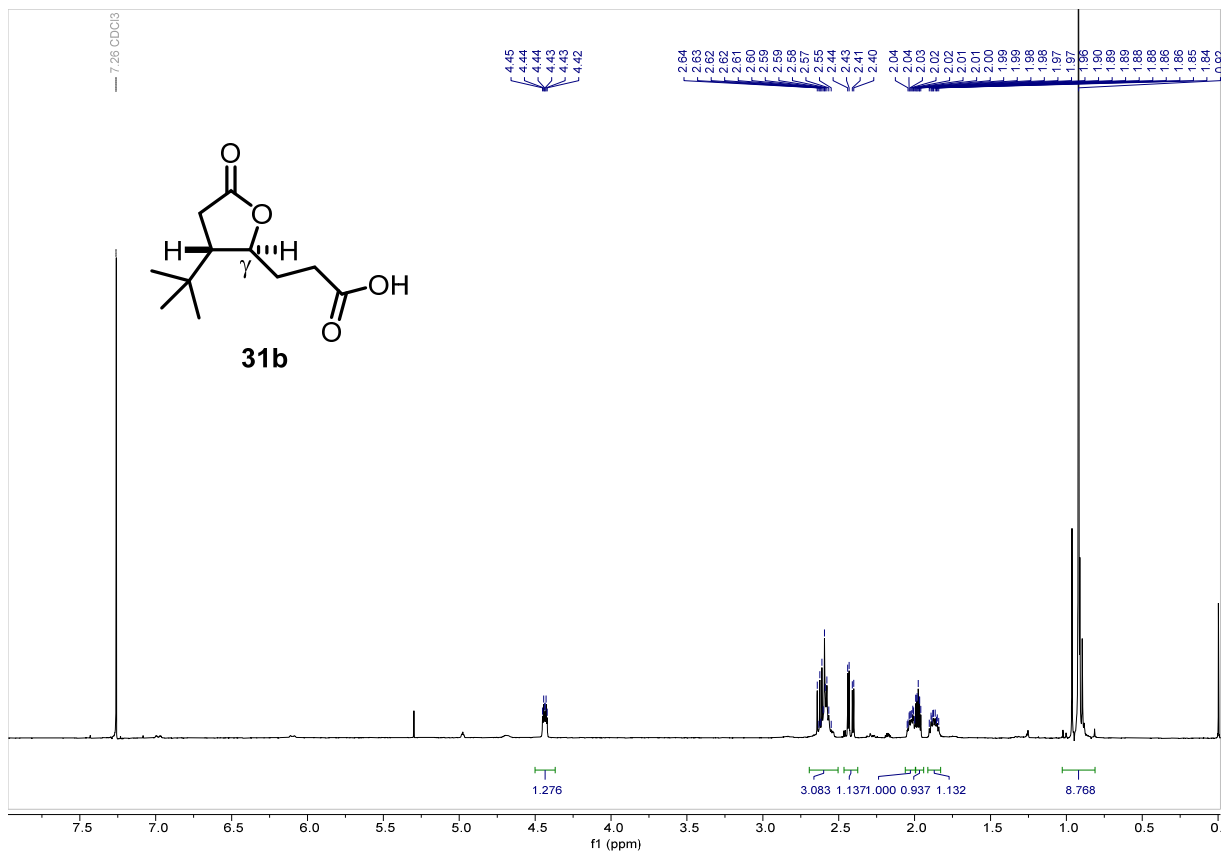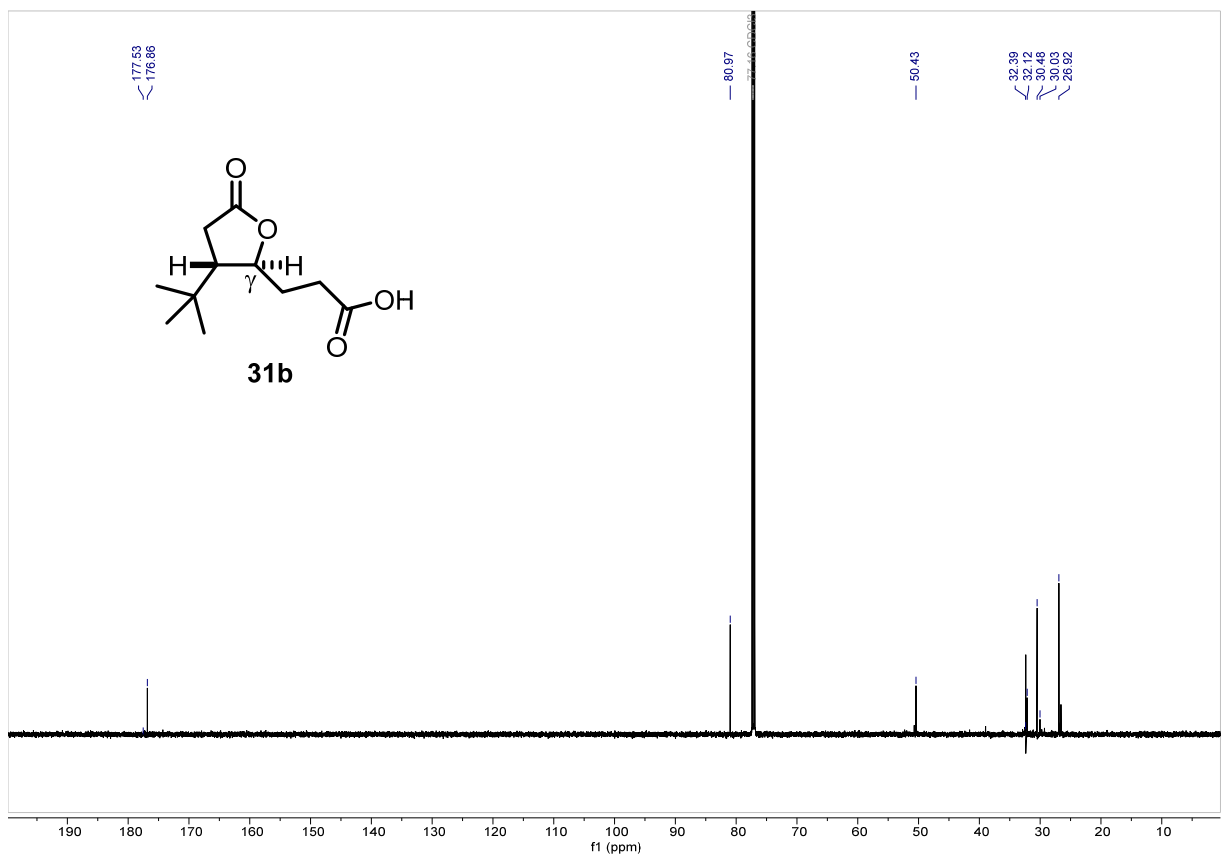

# Benzyl 5-oxo-2-phenyltetrahydrofuran-3-carboxylate 51b

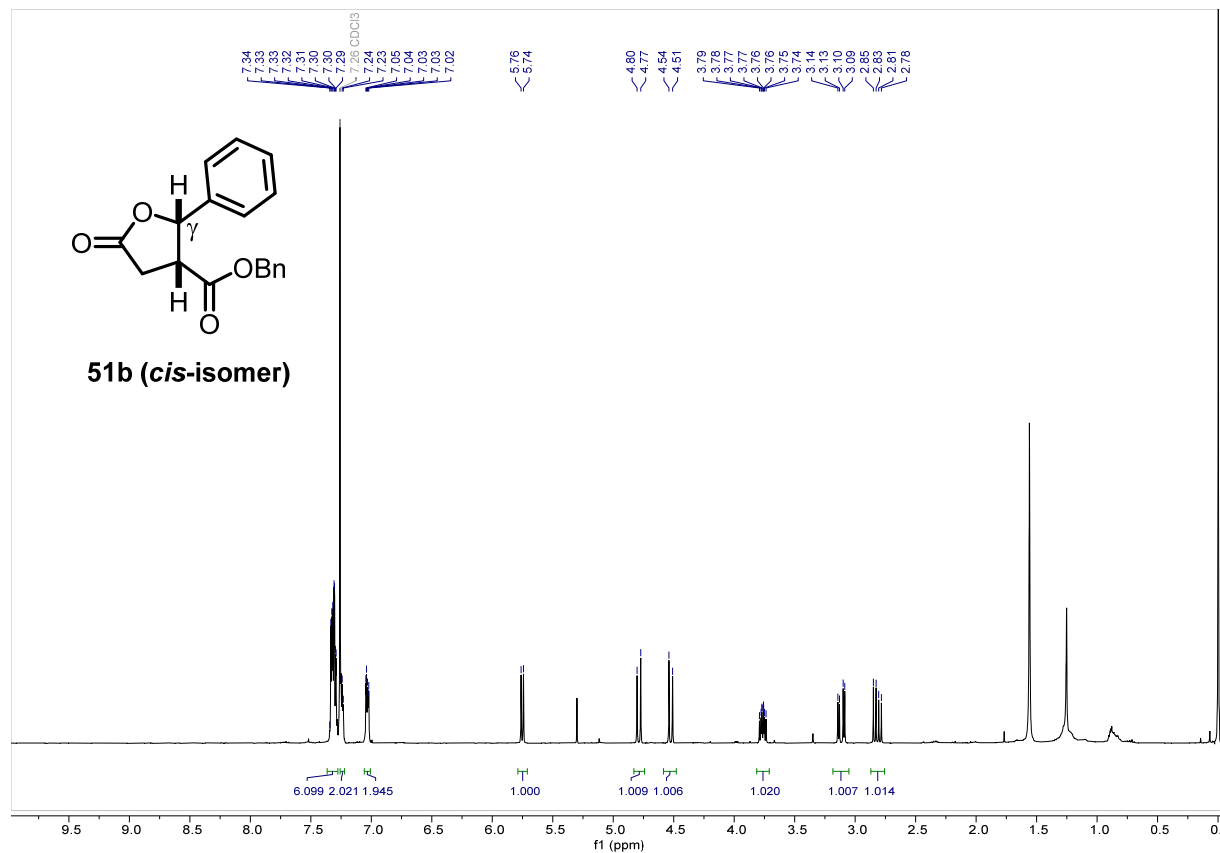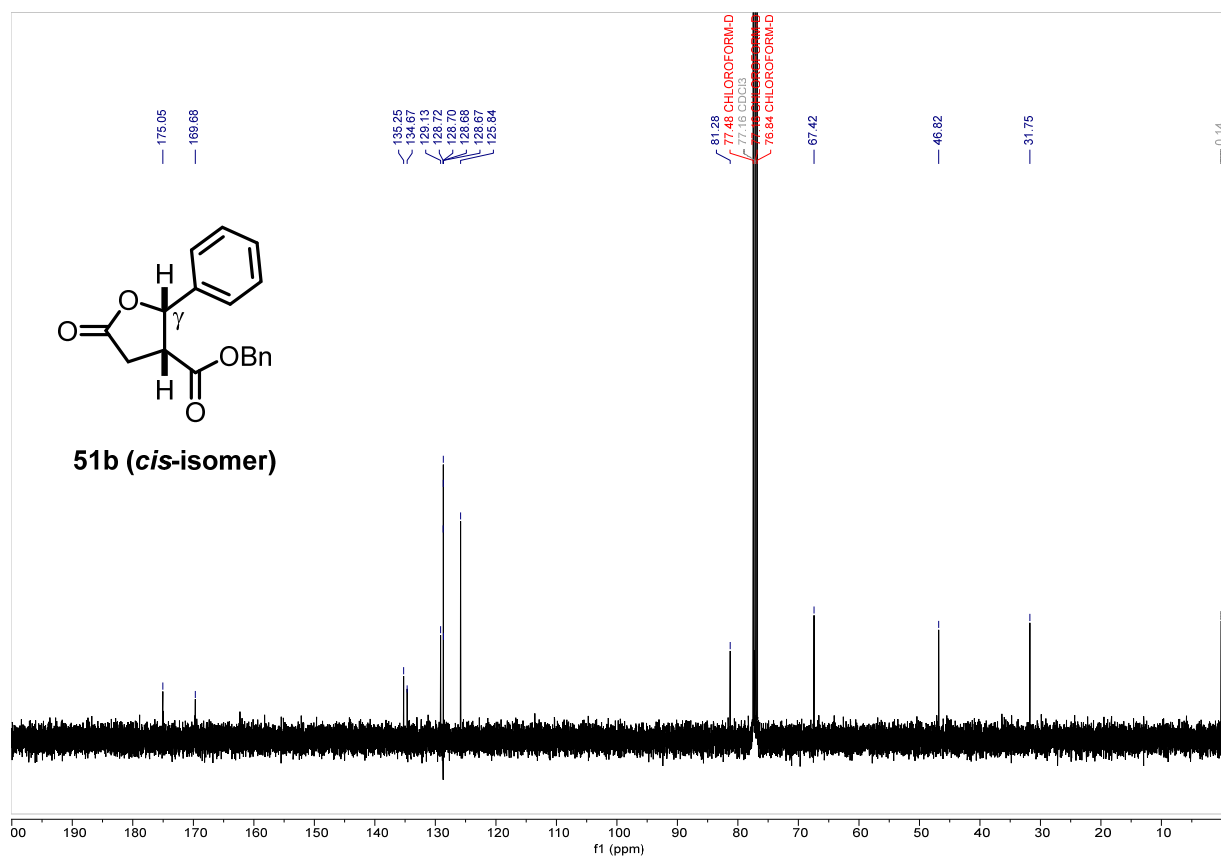

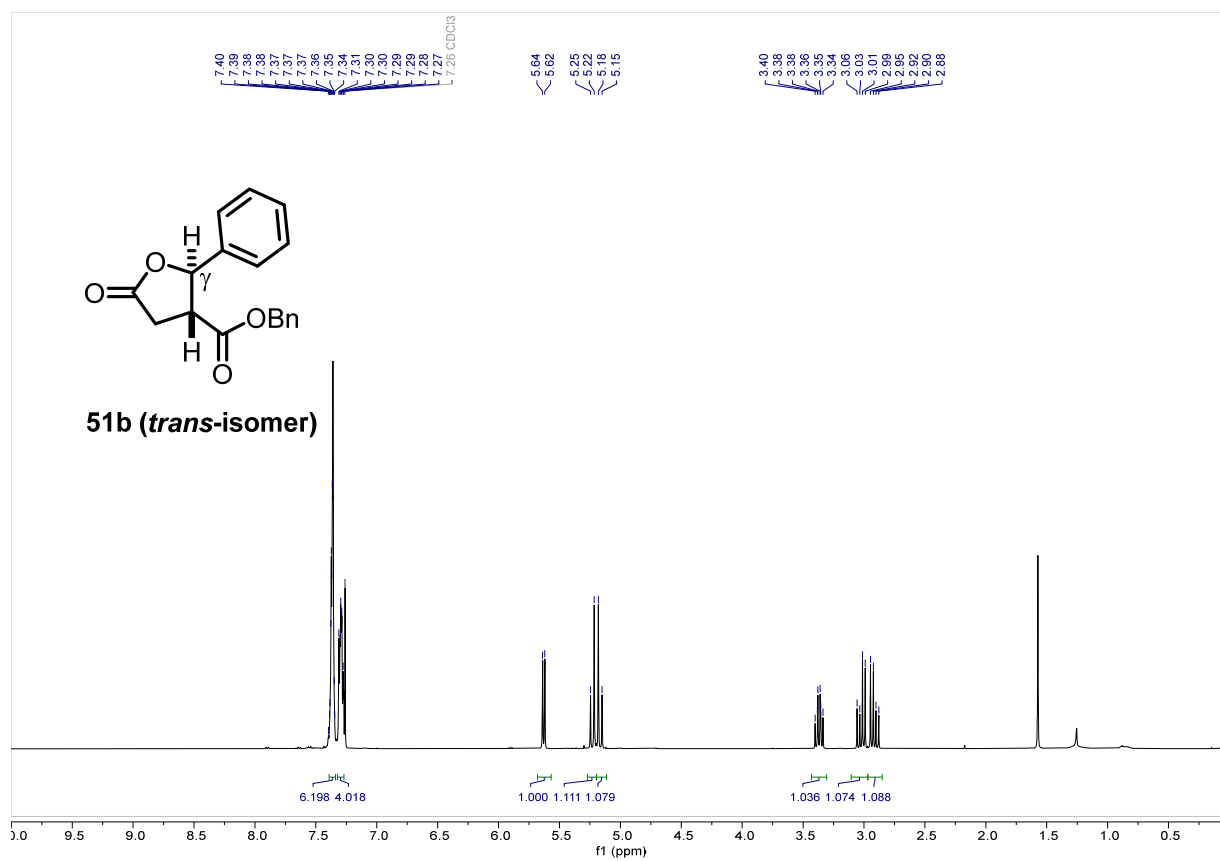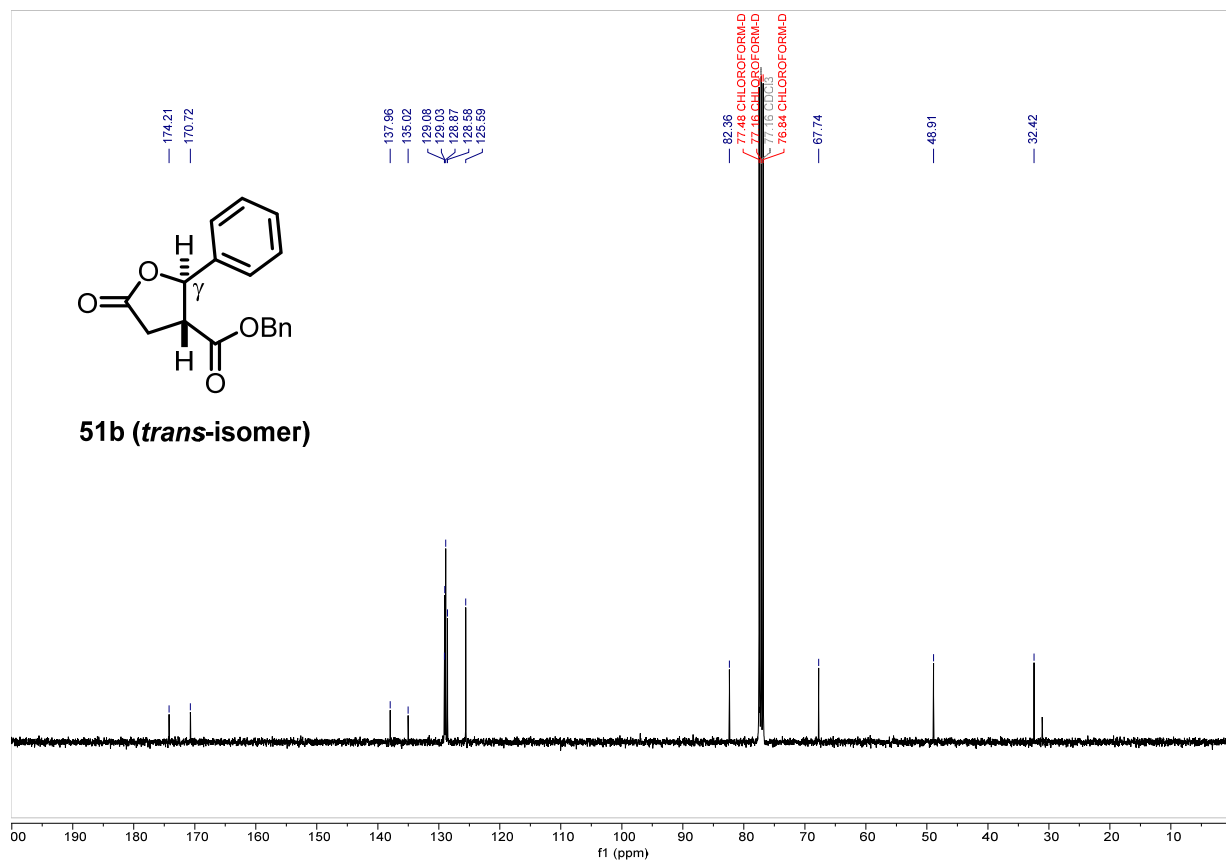

**Benzyl 2-((2*S*\*,3*S*\*)-5-oxo-2-phenyltetrahydrofuran-3-yl)acetate 52b**

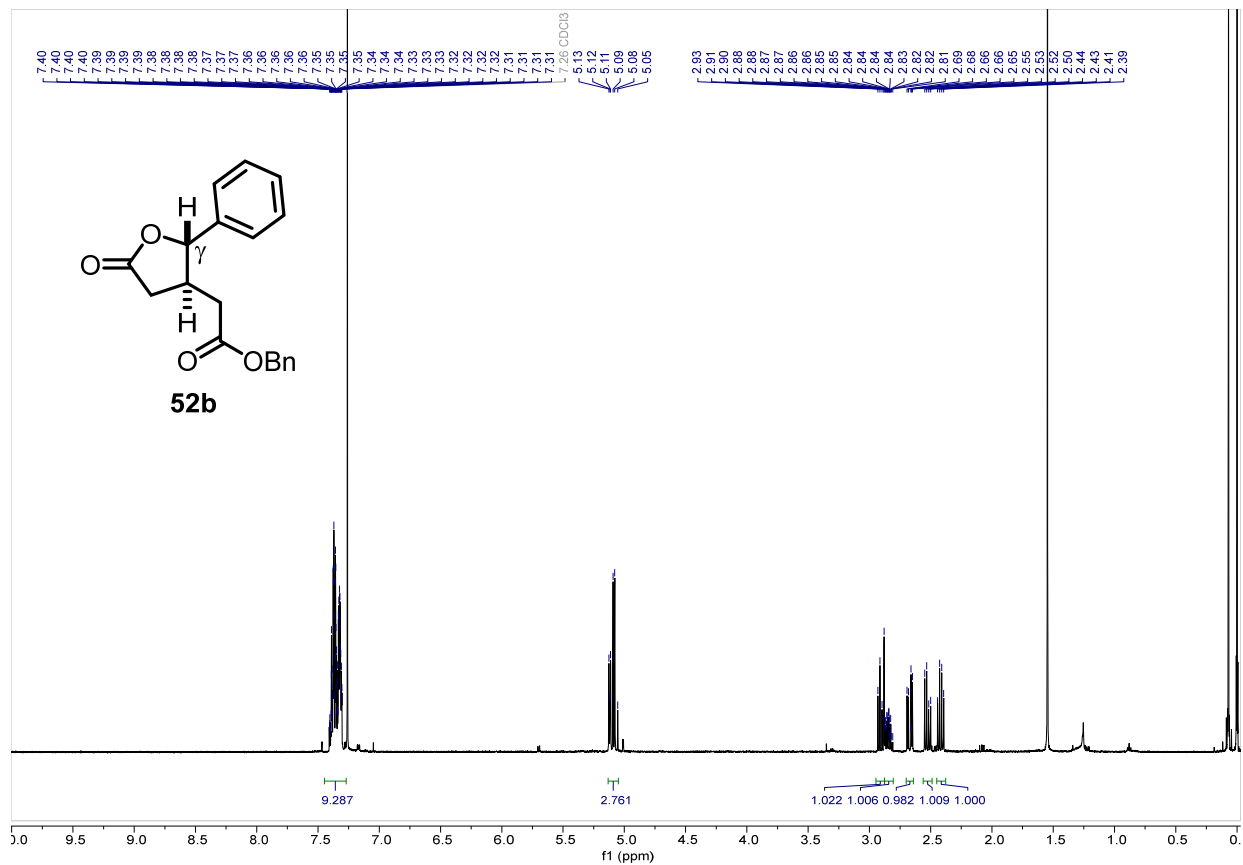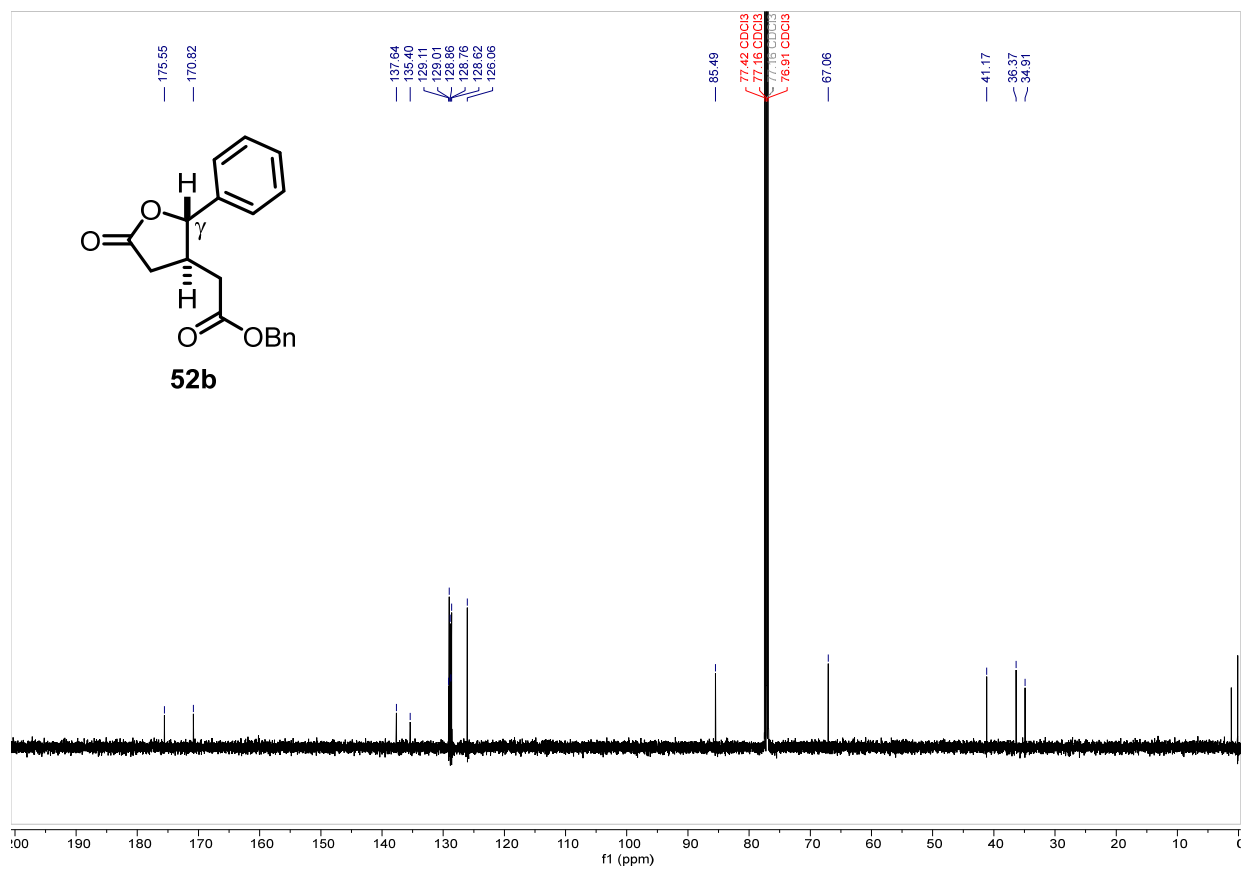

**(3*aS*\*,5*S*\*,6*aS*\*)-2-Oxohexahydro-2*H*-cyclopenta[*b*]furan-5-carboxylic acid 25b**

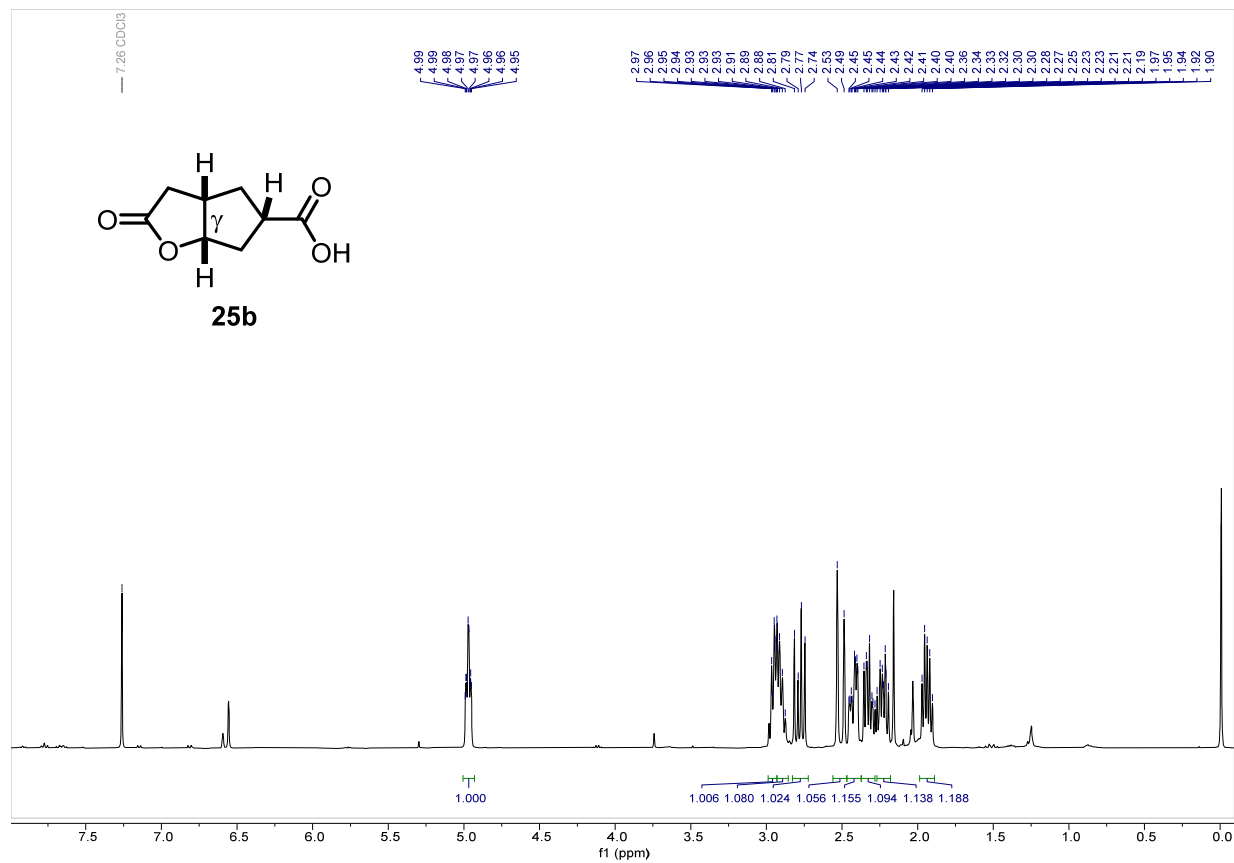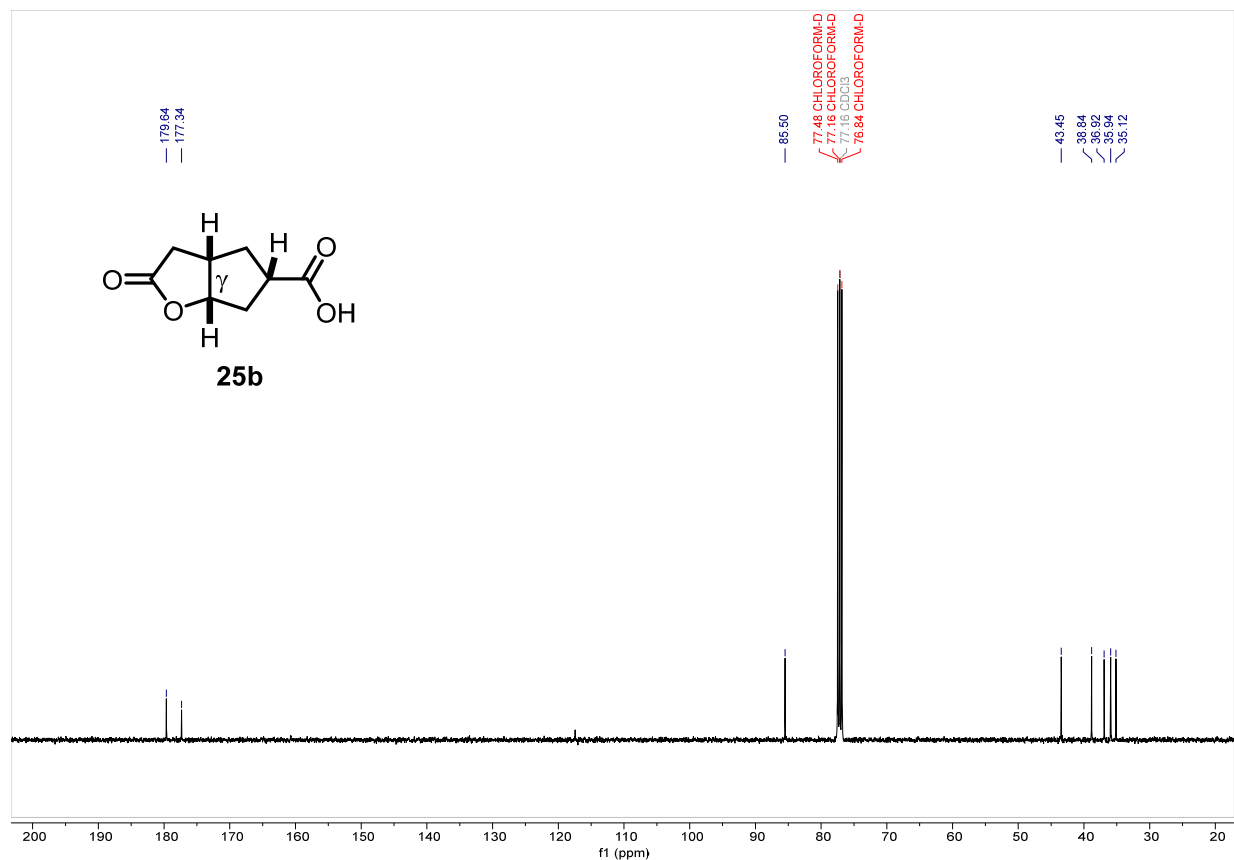

**(3*aS*\*,5*S*\*,6*aS*\*)-5-(hydroxymethyl)hexahydro-2*H*-cyclopenta[*b*]furan-2-one 25b'**

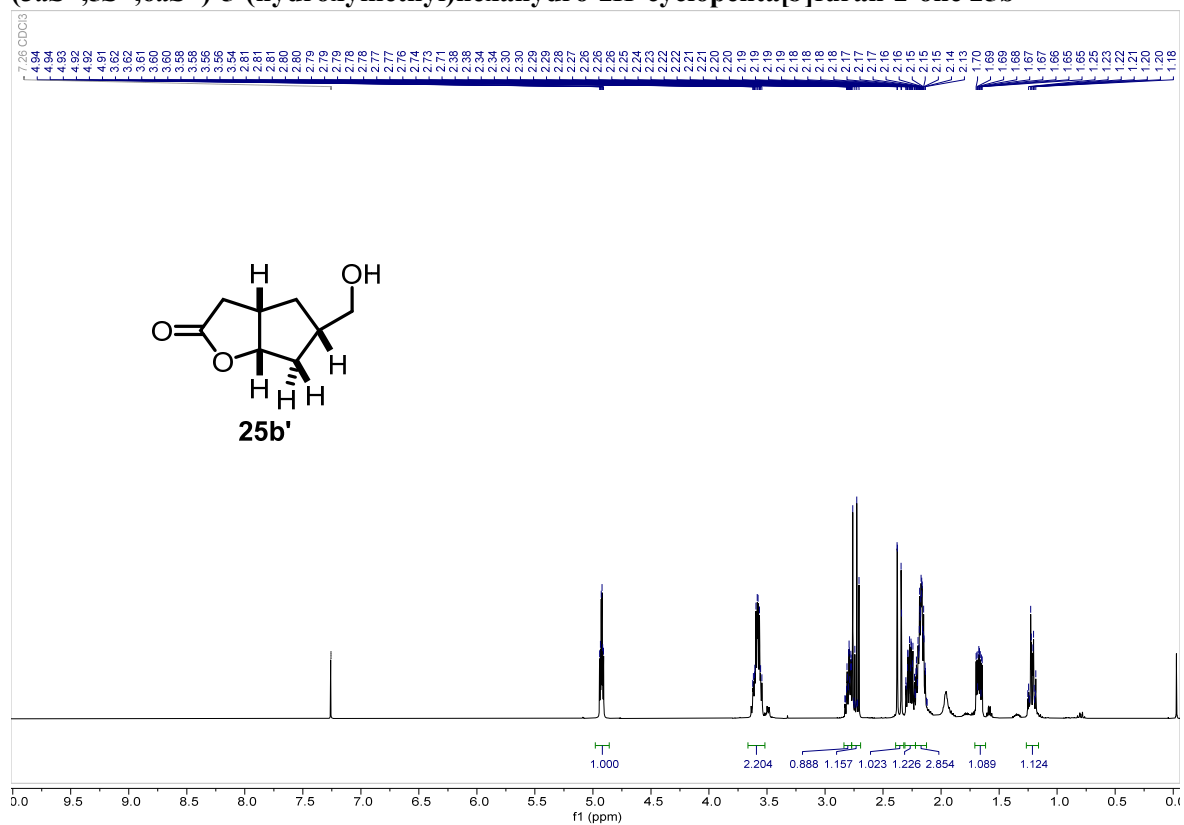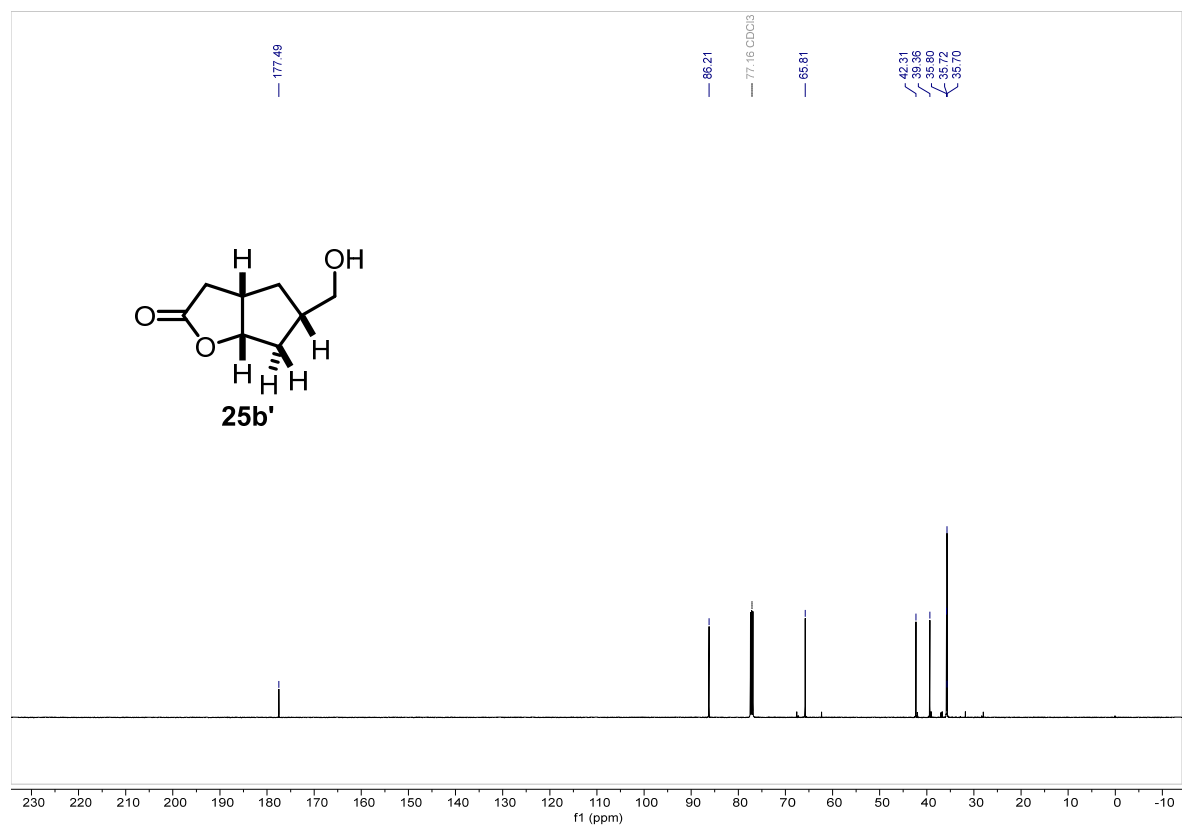



**(3*aS*\*,6*S*\*,7*aS*\*)-2-Oxoctahydrobenzofuran-6-carboxylic acid 53b**

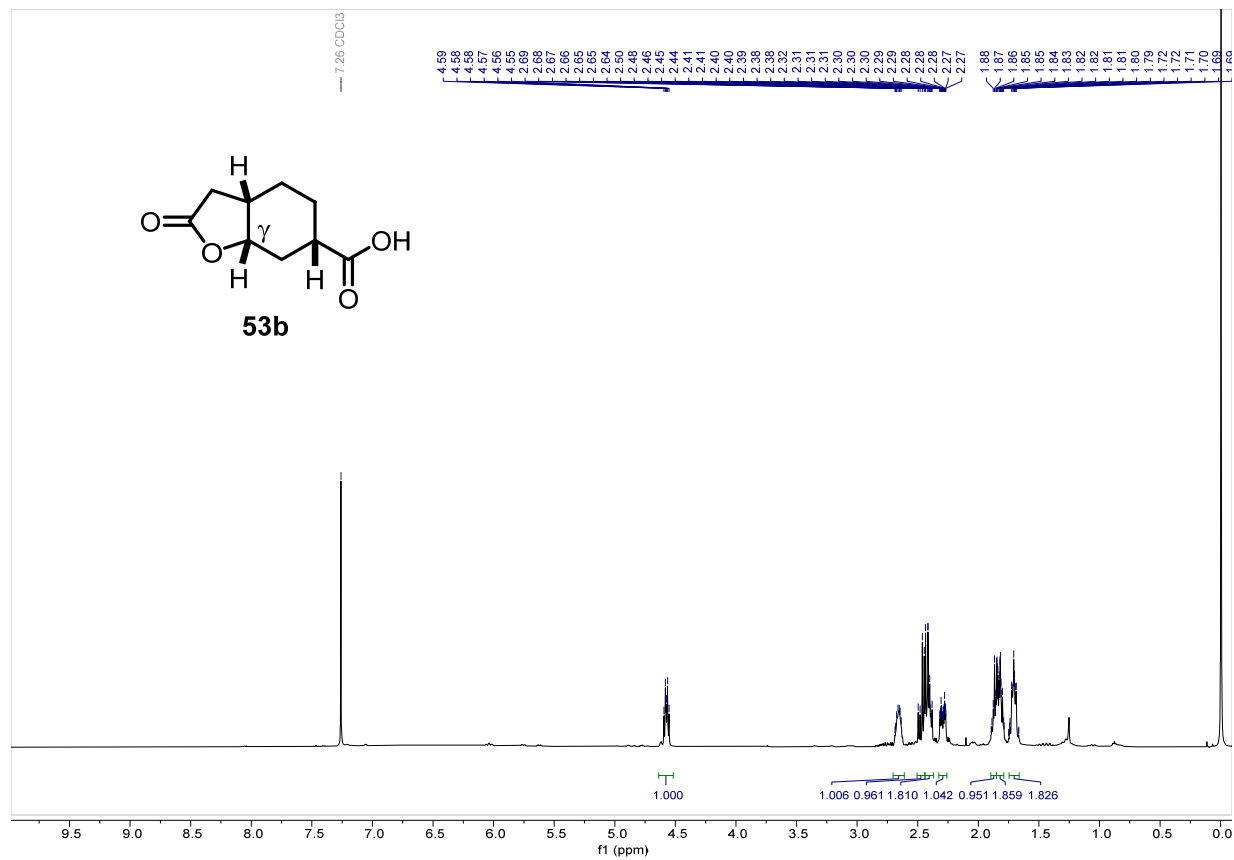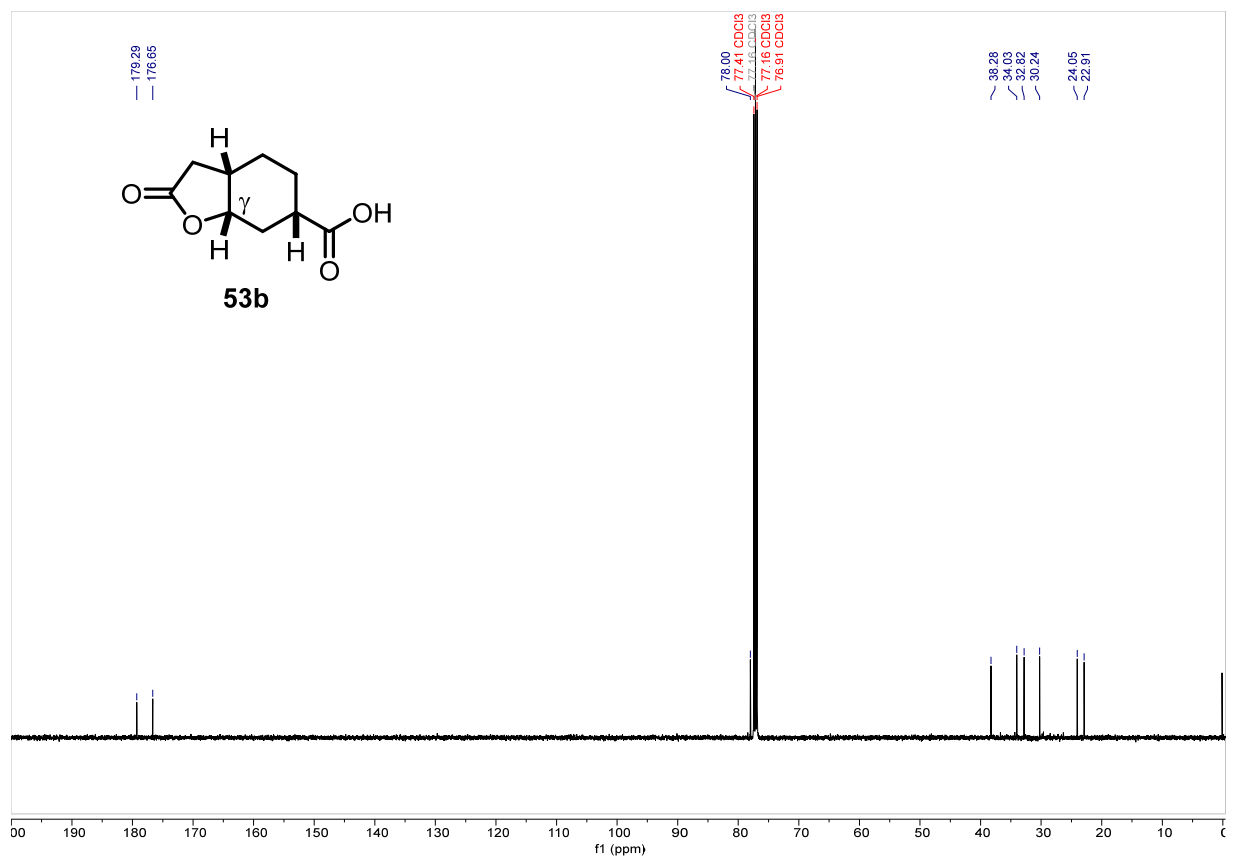

**Benzyl (3*aS*\*,6*S*\*,7*aS*\*)-2-oxooctahydrobenzofuran-6-carboxylate 53b'**

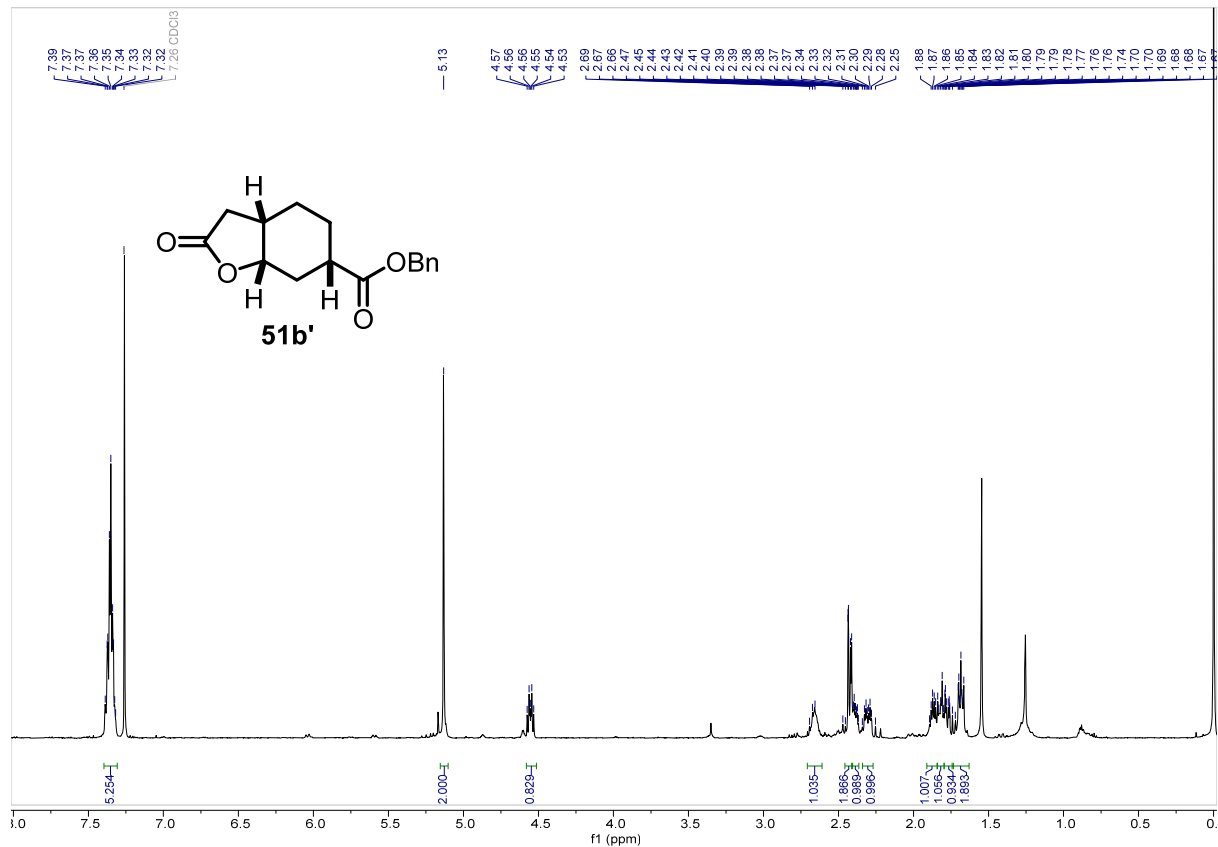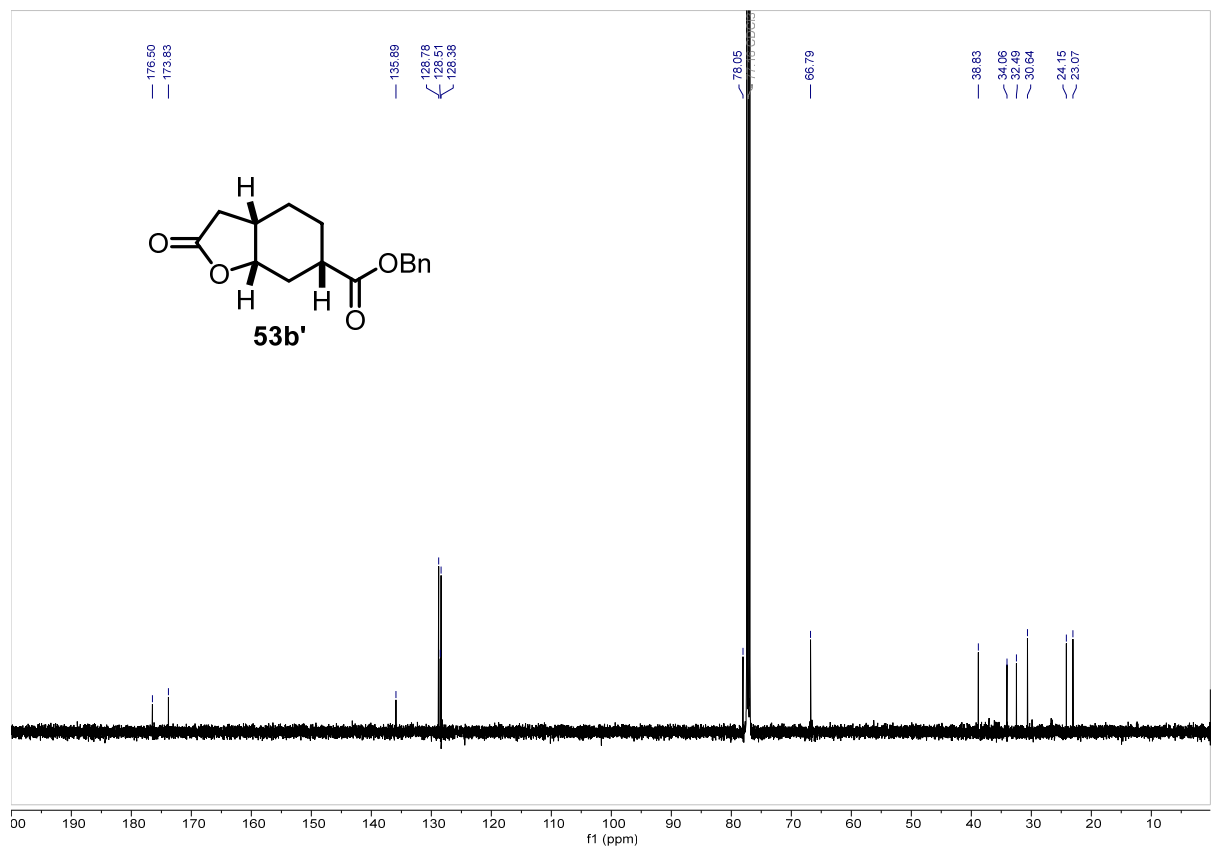

# Benzyl 3-(3-oxo-1,3-dihydroisobenzofuran-1-yl)propanoate 32b

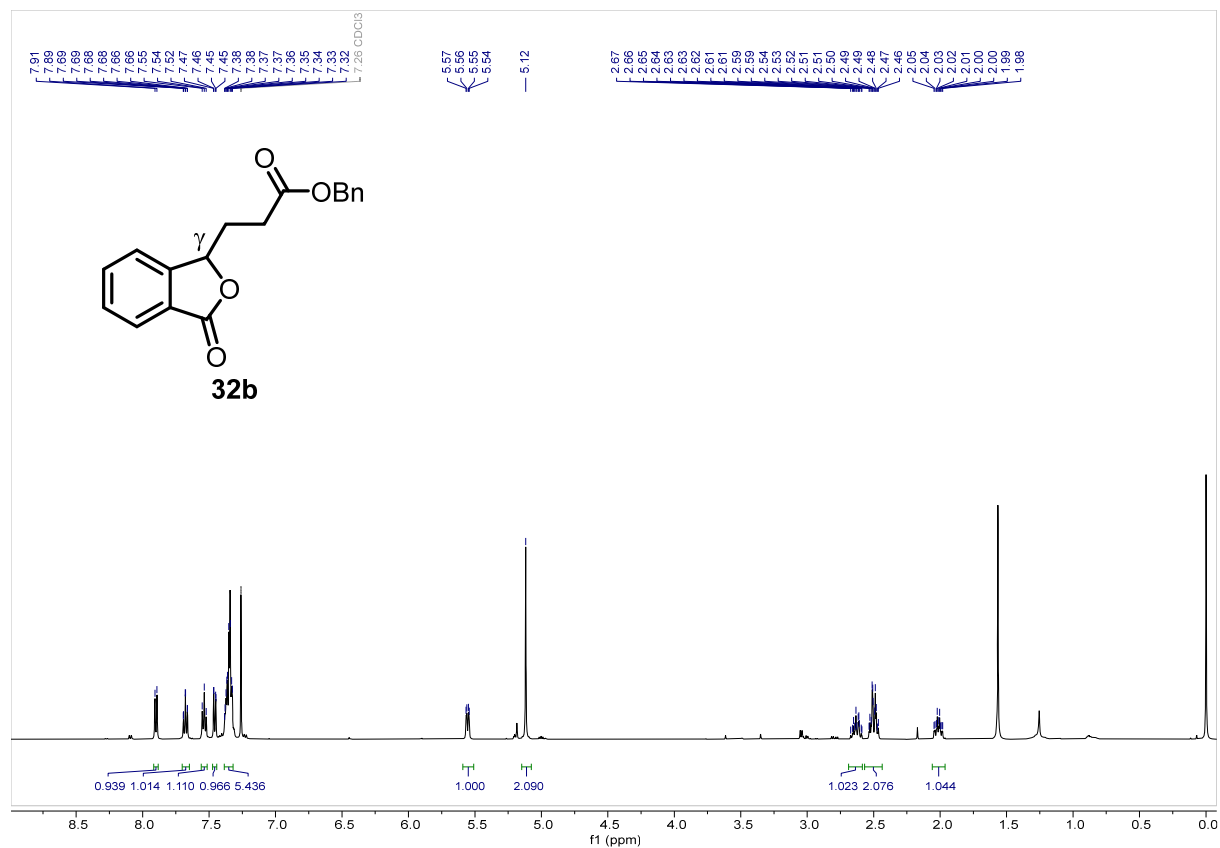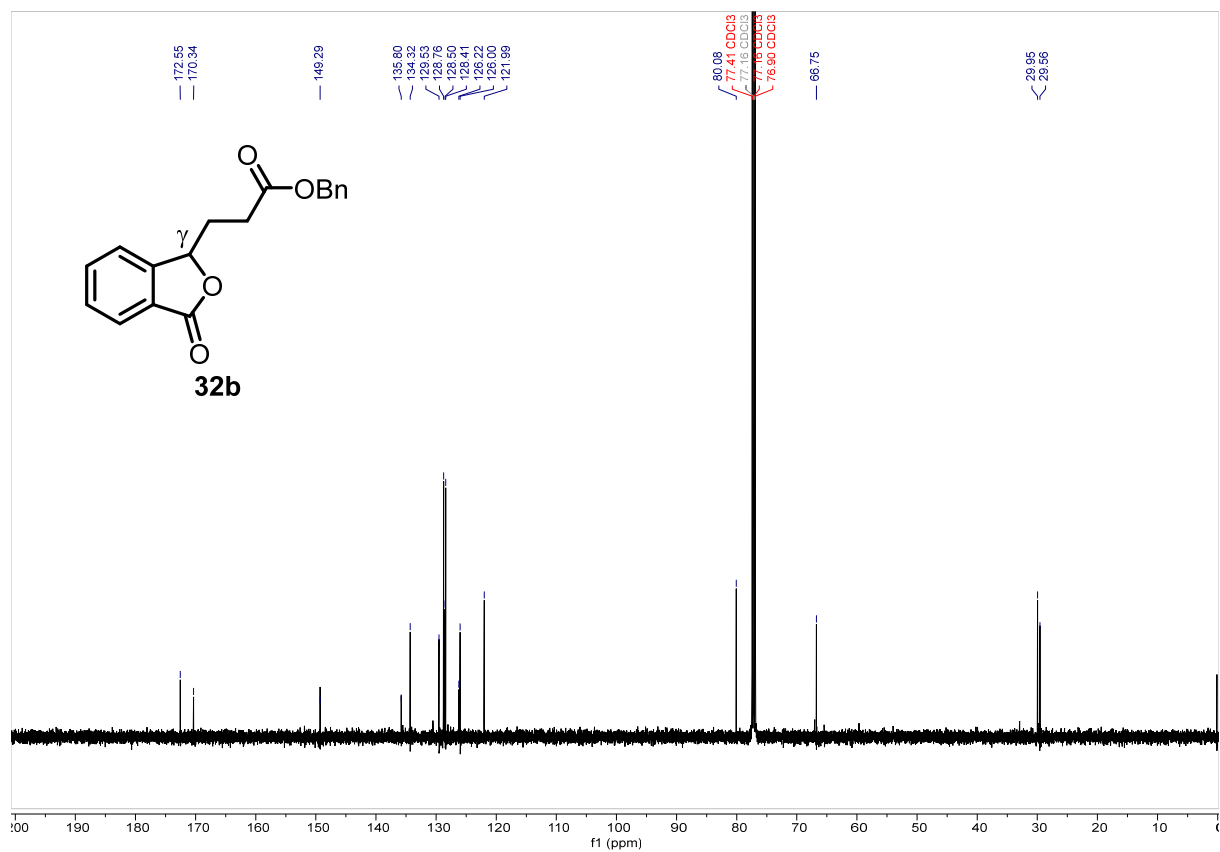

### 3-(7-Oxo-5,7-dihydro-[1,3]dioxolo[4,5-f]isobenzofuran-5-yl)propanoic acid 33b

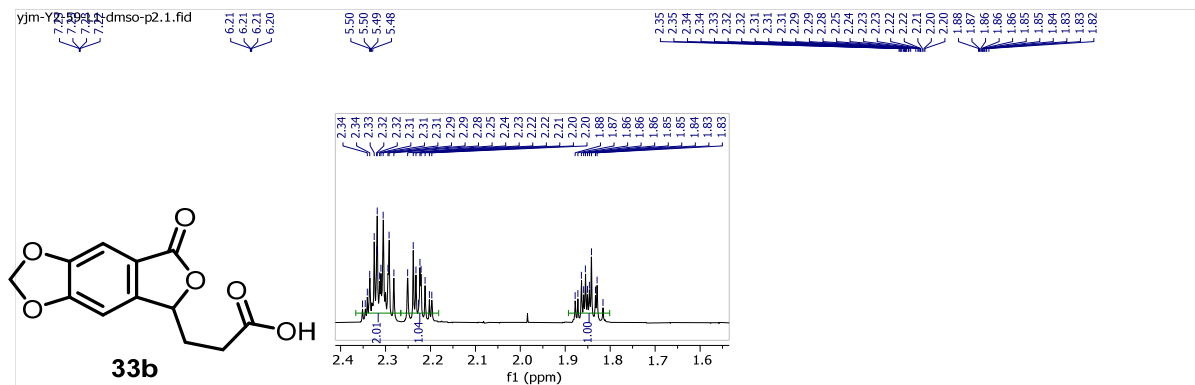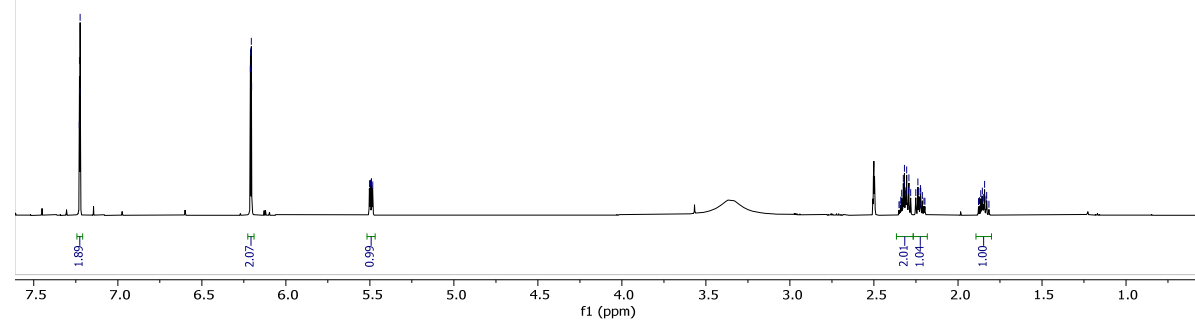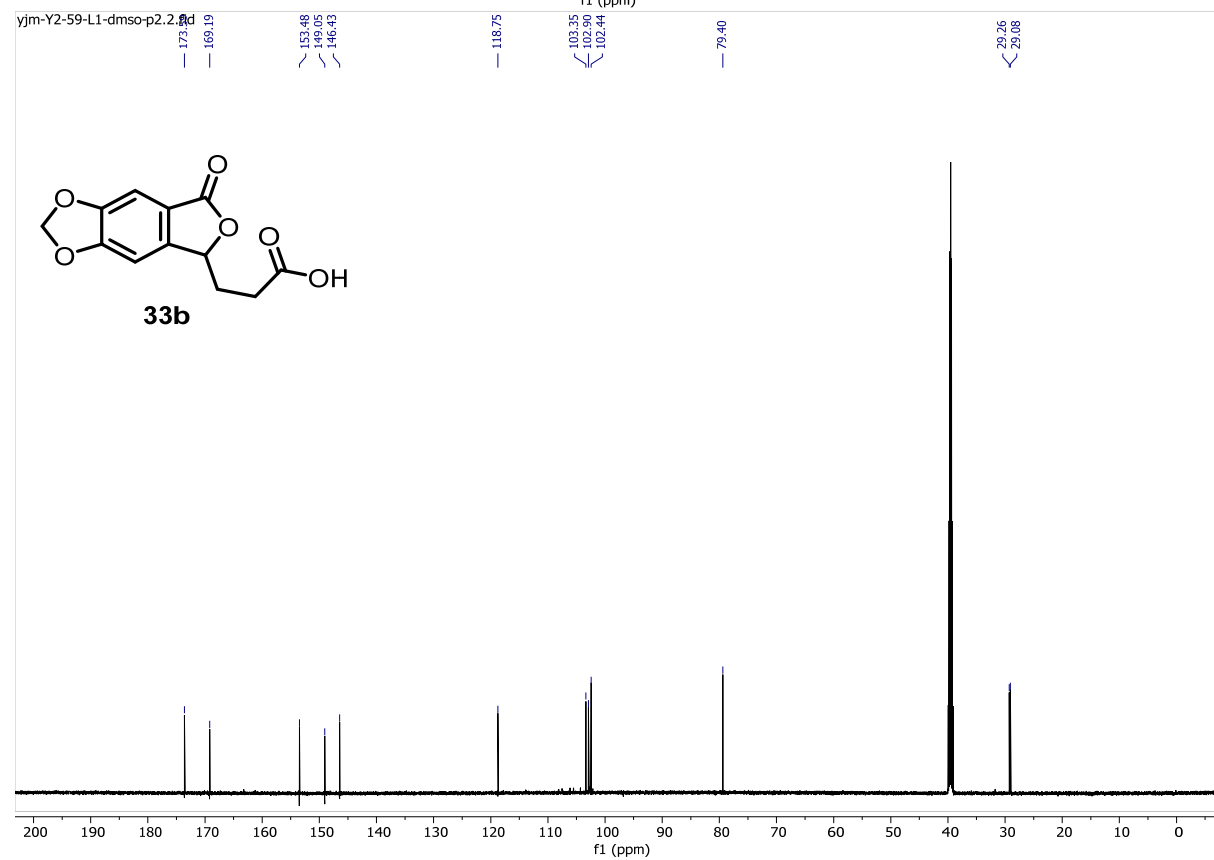

### 3-(5,6-Dimethoxy-3-oxo-1,3-dihydroisobenzofuran-1-yl)propanoic acid 34b

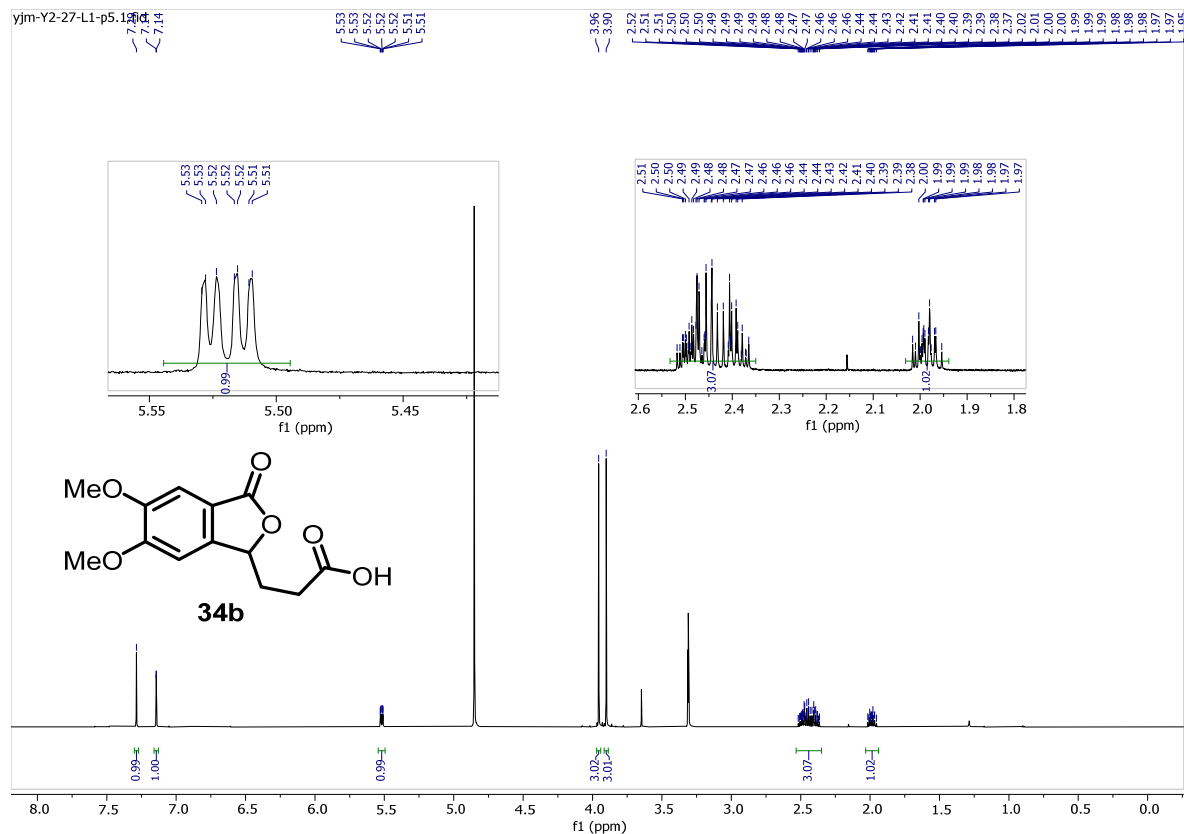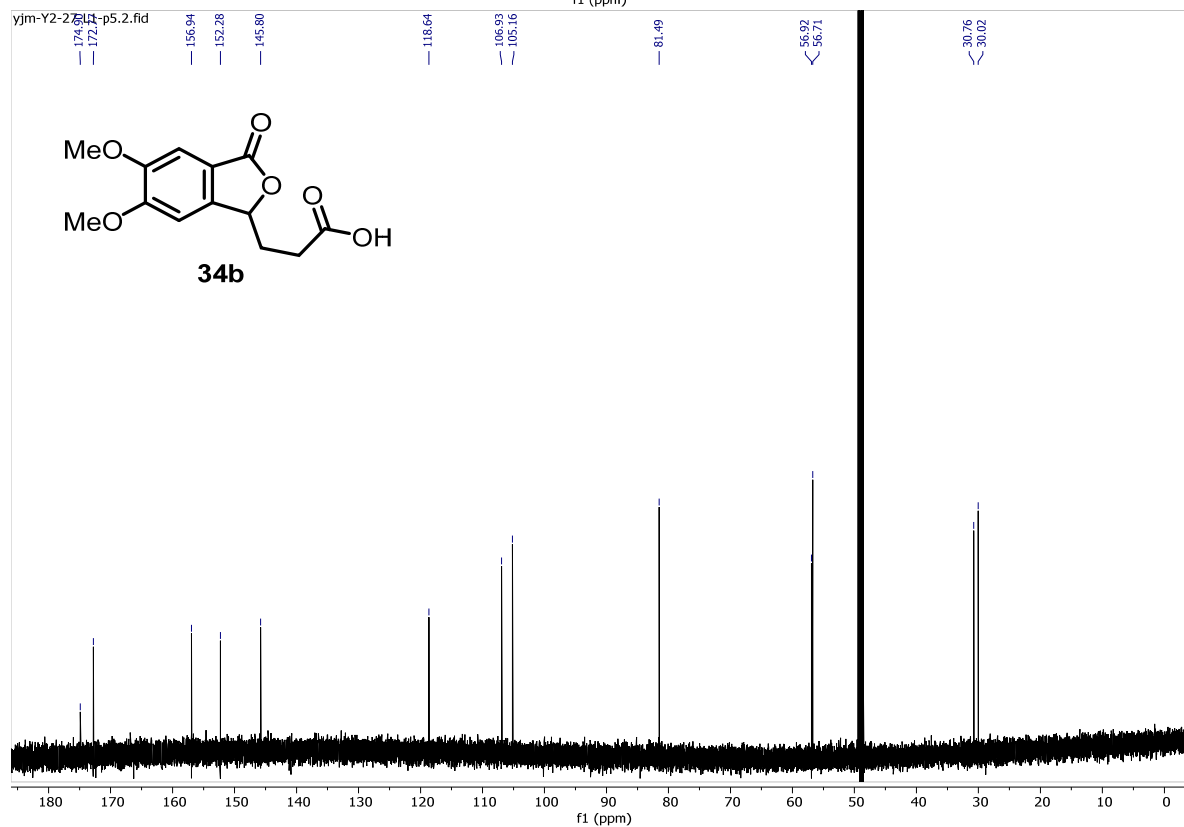

### 3-(5-Methoxy-3-oxo-1,3-dihydroisobenzofuran-1-yl)propanoic acid 35b

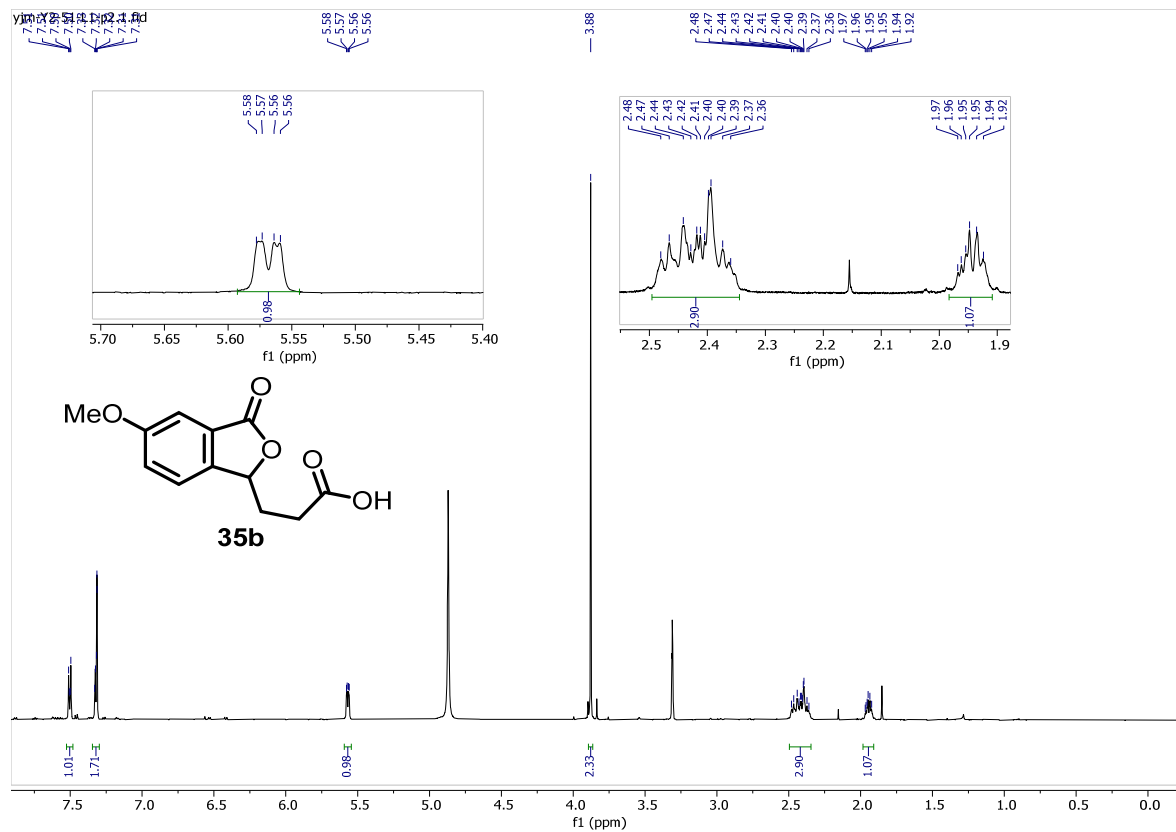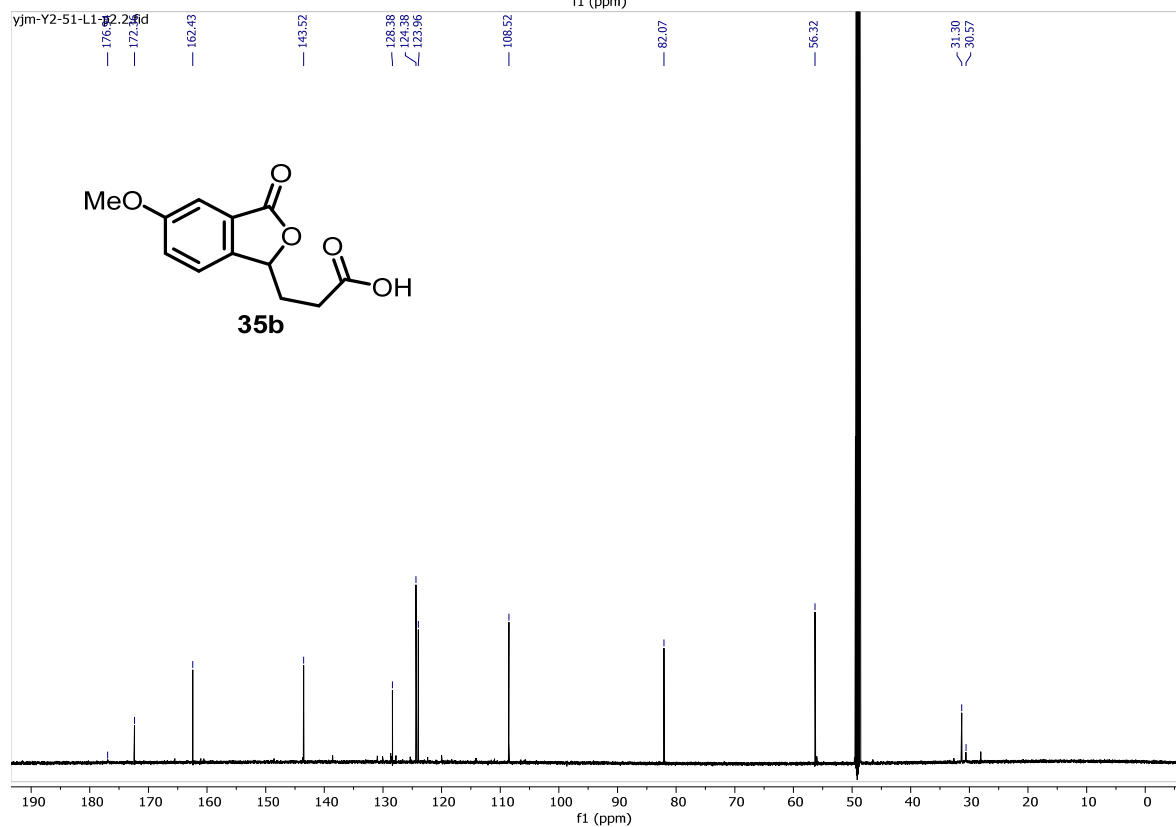

### 3-(6-(2,5-Dioxopyrrolidin-1-yl)-3-oxo-1,3-dihydroisobenzofuran-1-yl)propanoic acid 36b

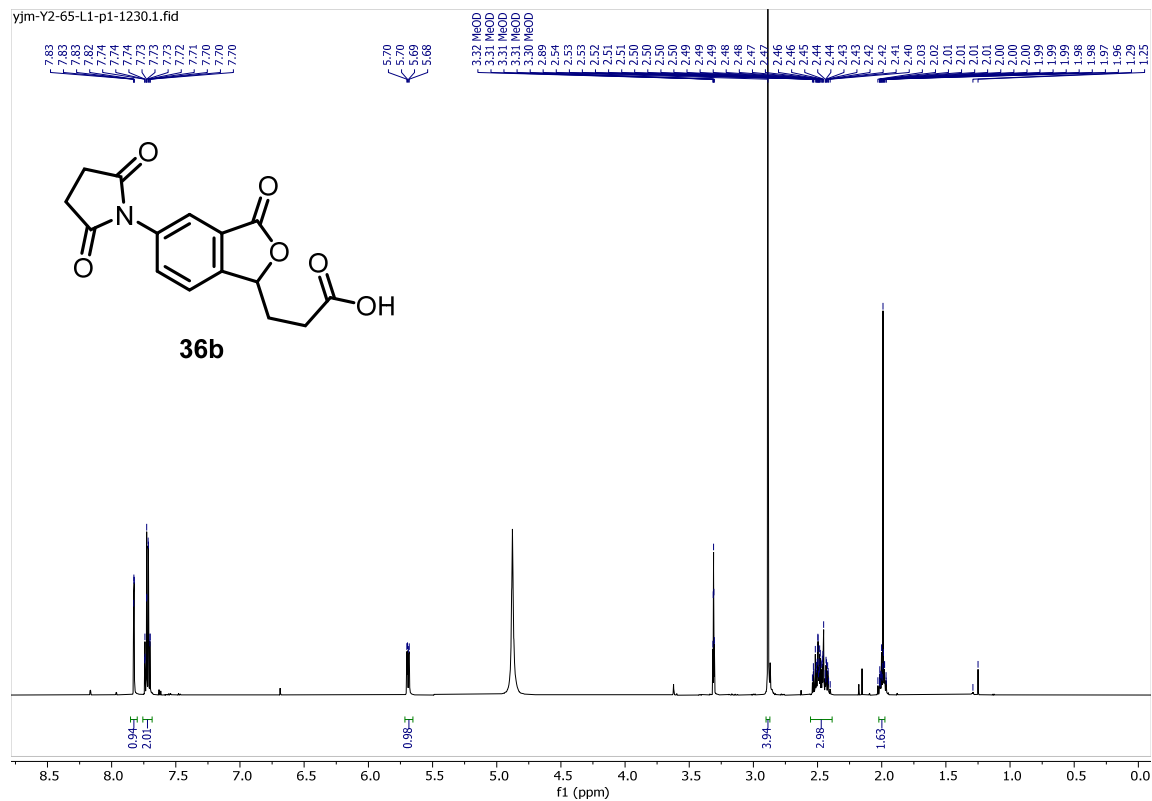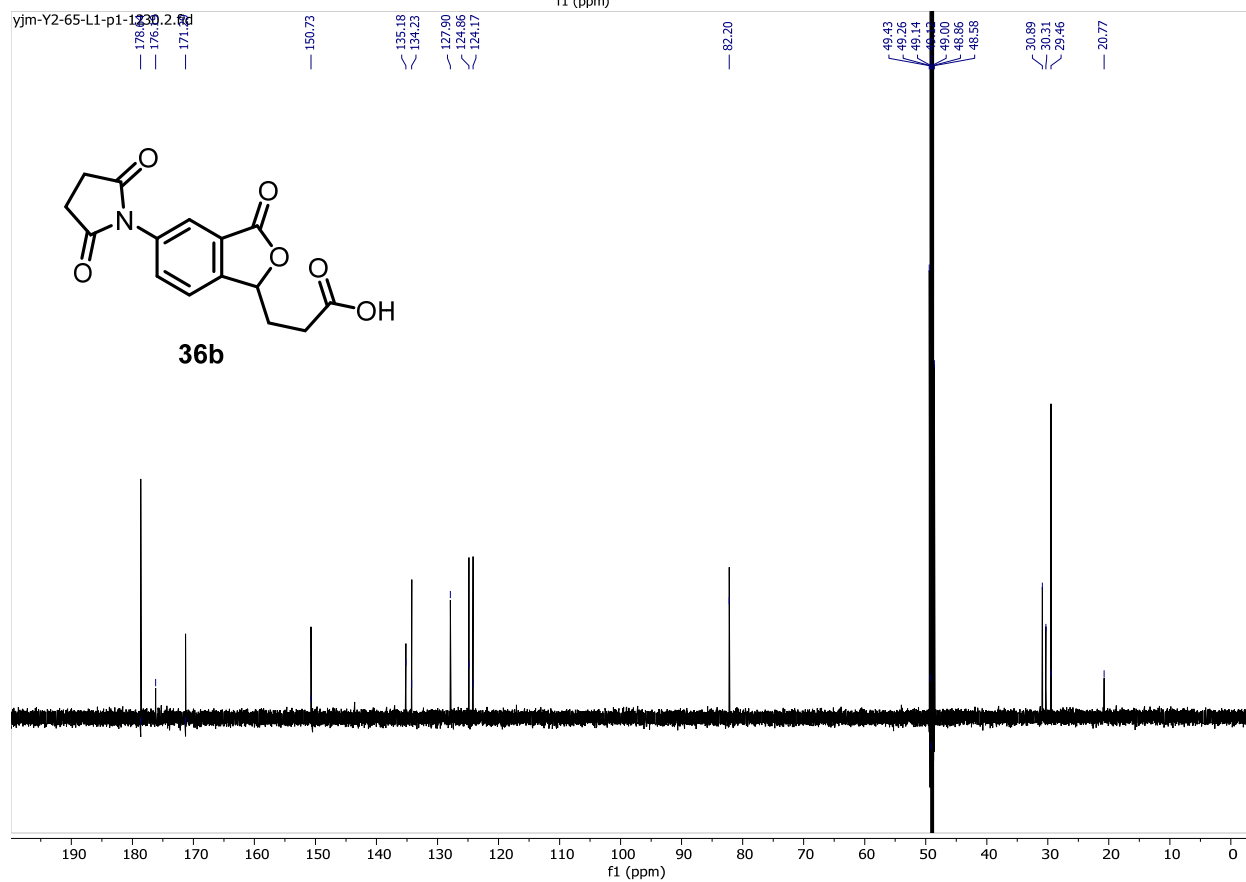

### 3-(4-Methyl-3-oxo-1,3-dihydroisobenzofuran-1-yl)propanoic acid 37b

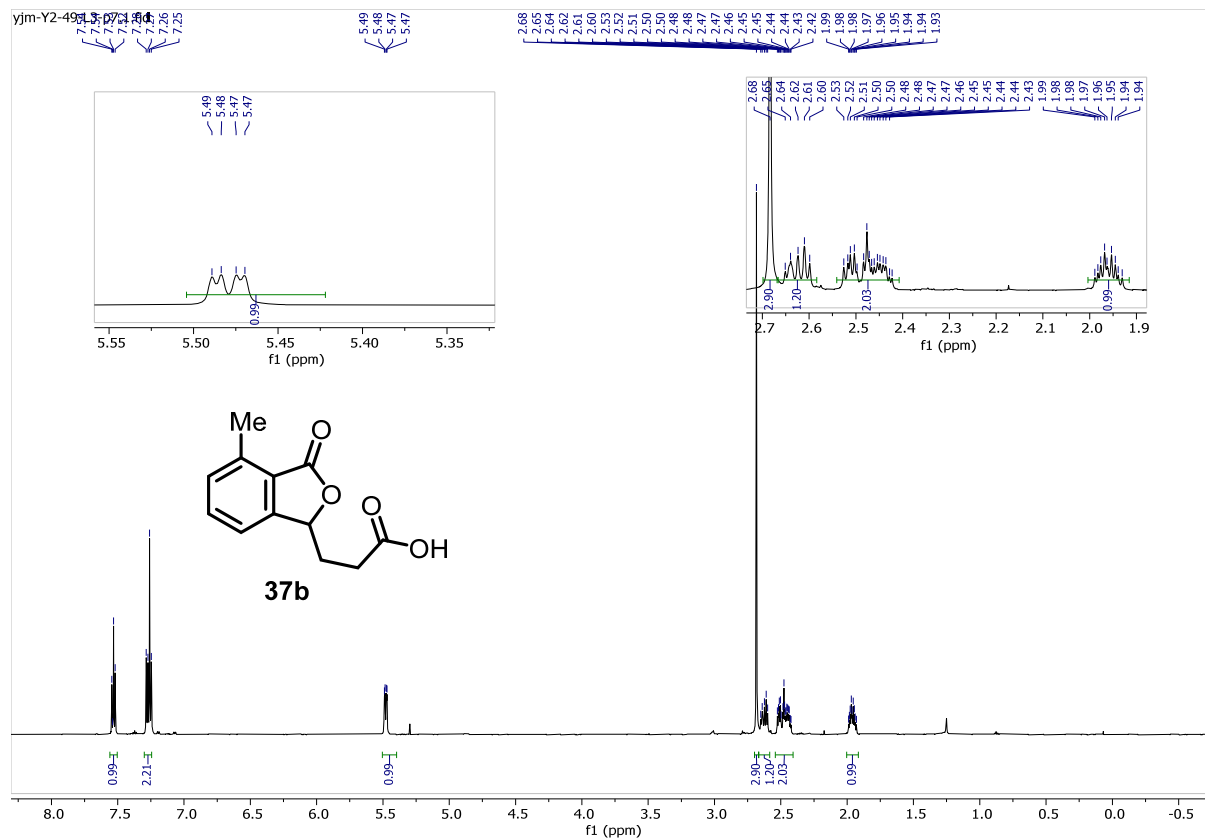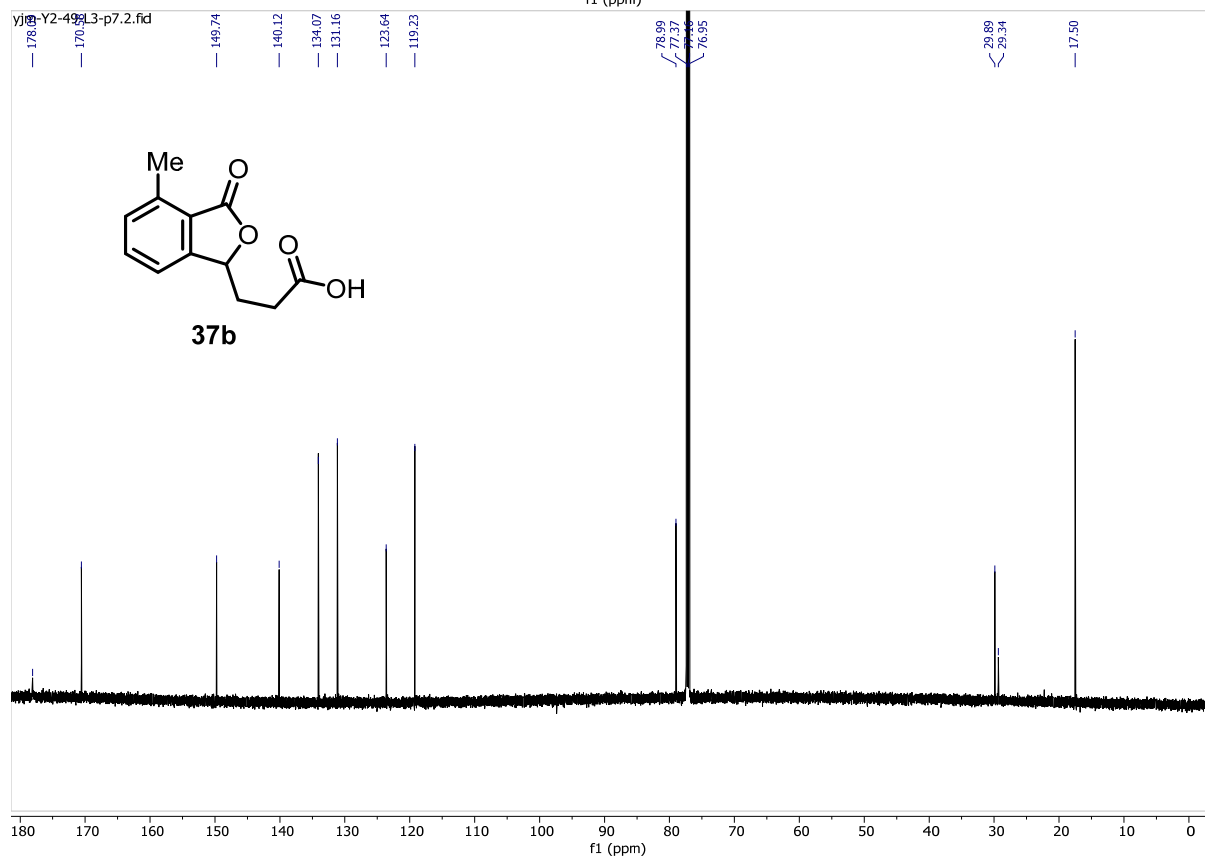



### 3-(6-Methyl-3-oxo-1,3-dihydroisobenzofuran-1-yl)propanoic acid 38b

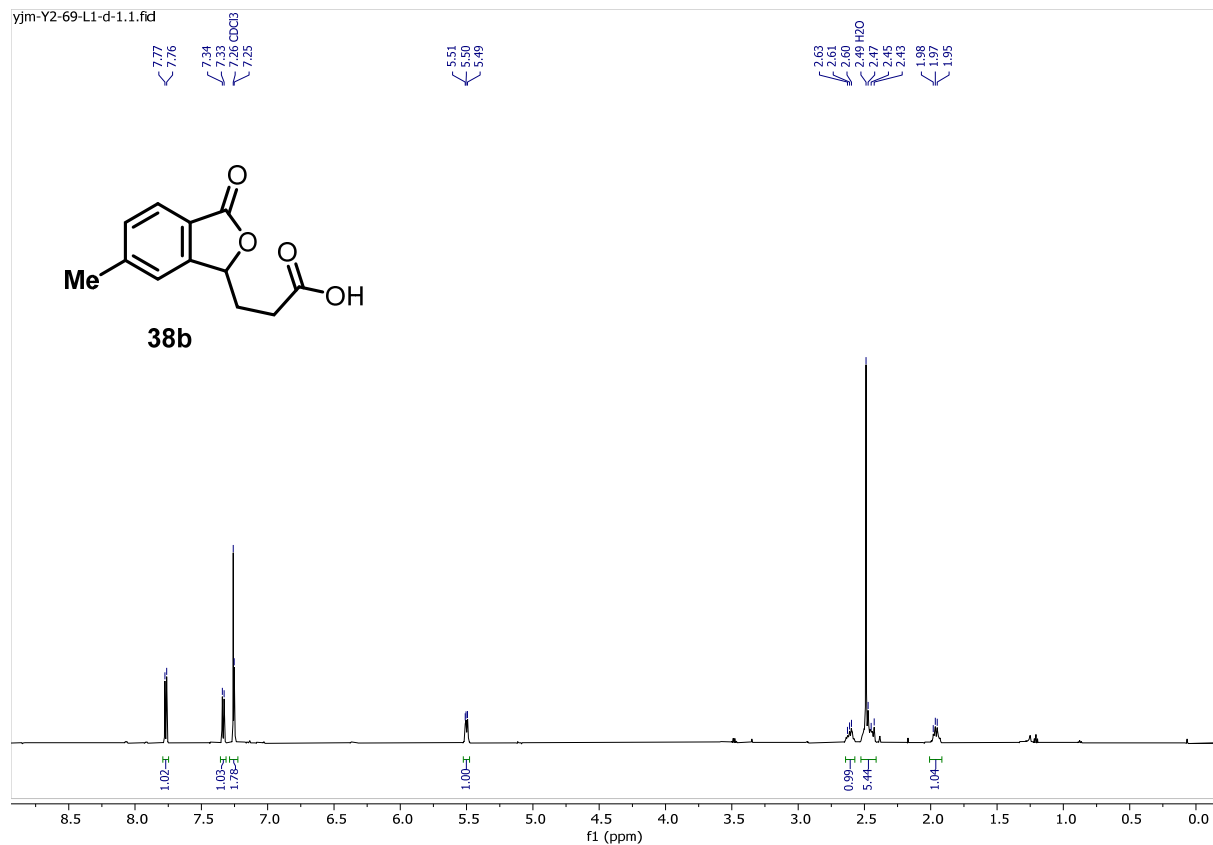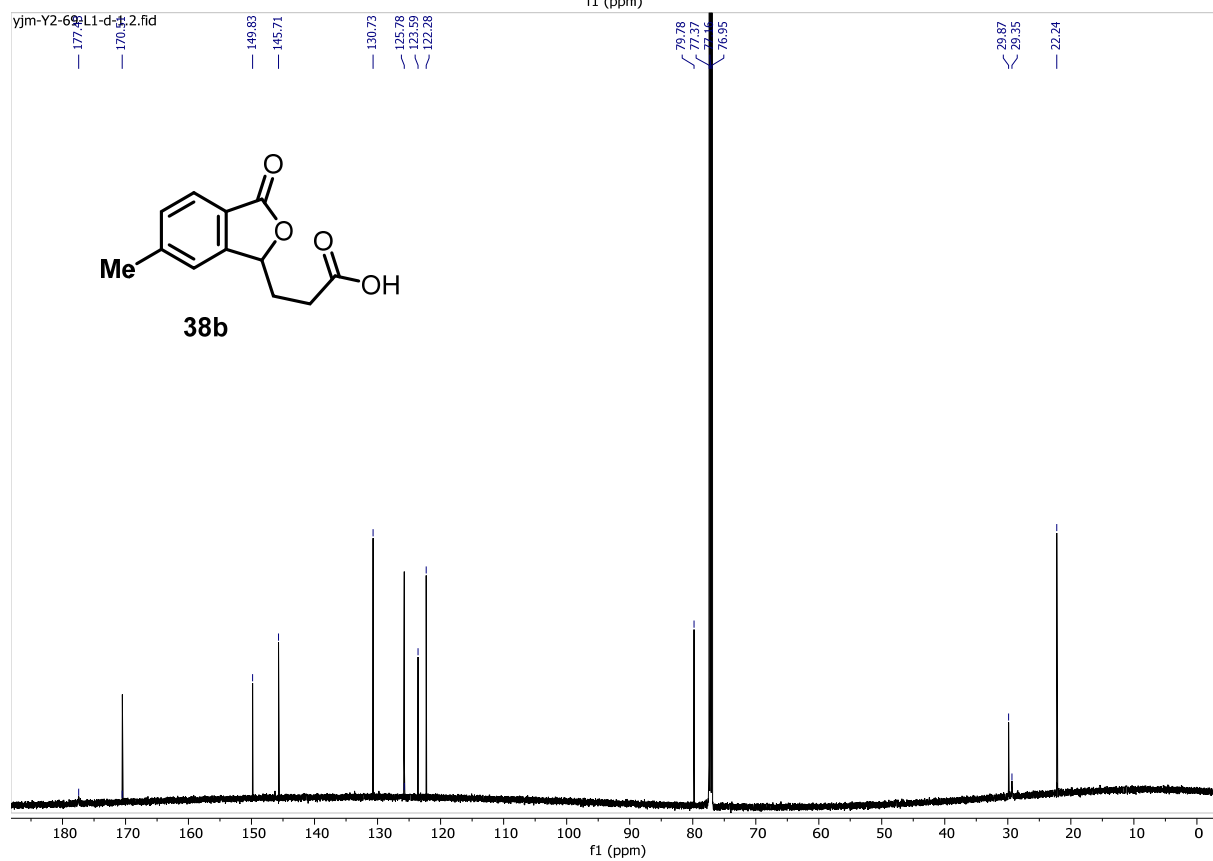

### 3-(7-Methyl-3-oxo-1,3-dihydroisobenzofuran-1-yl)propanoic acid 39b

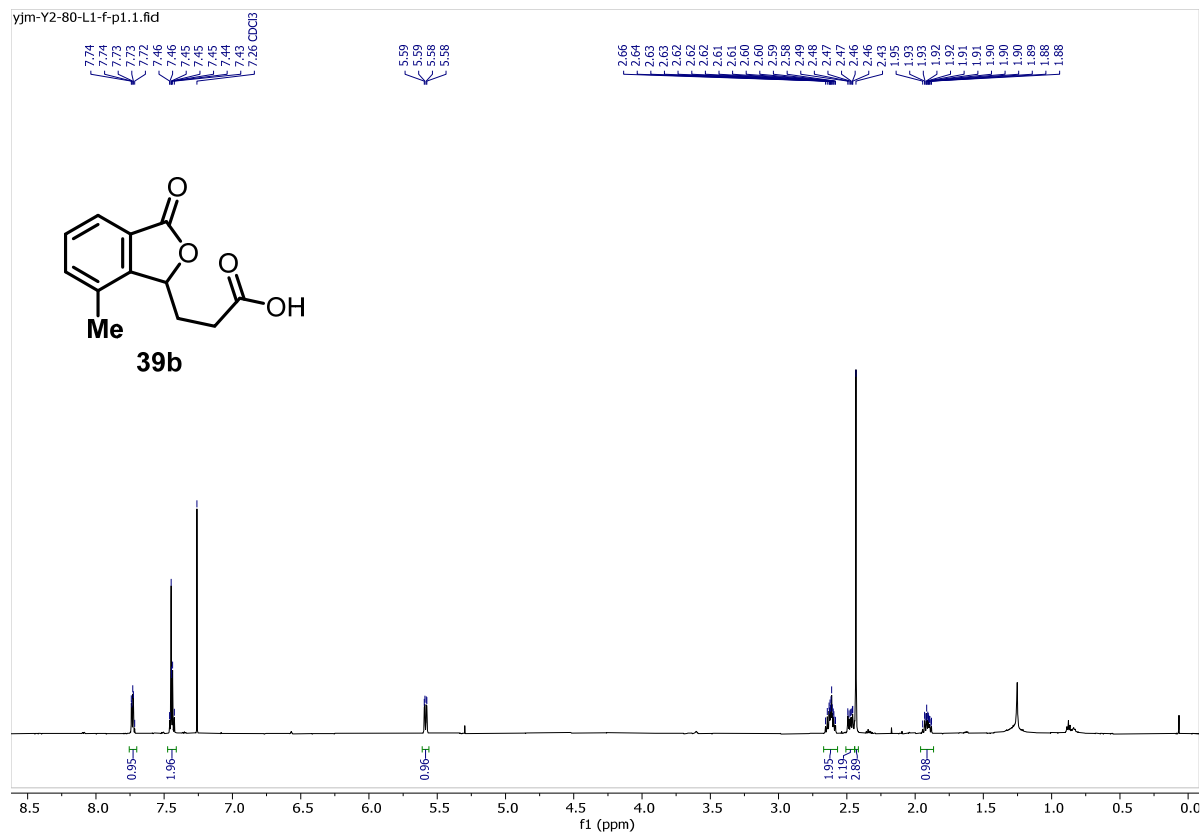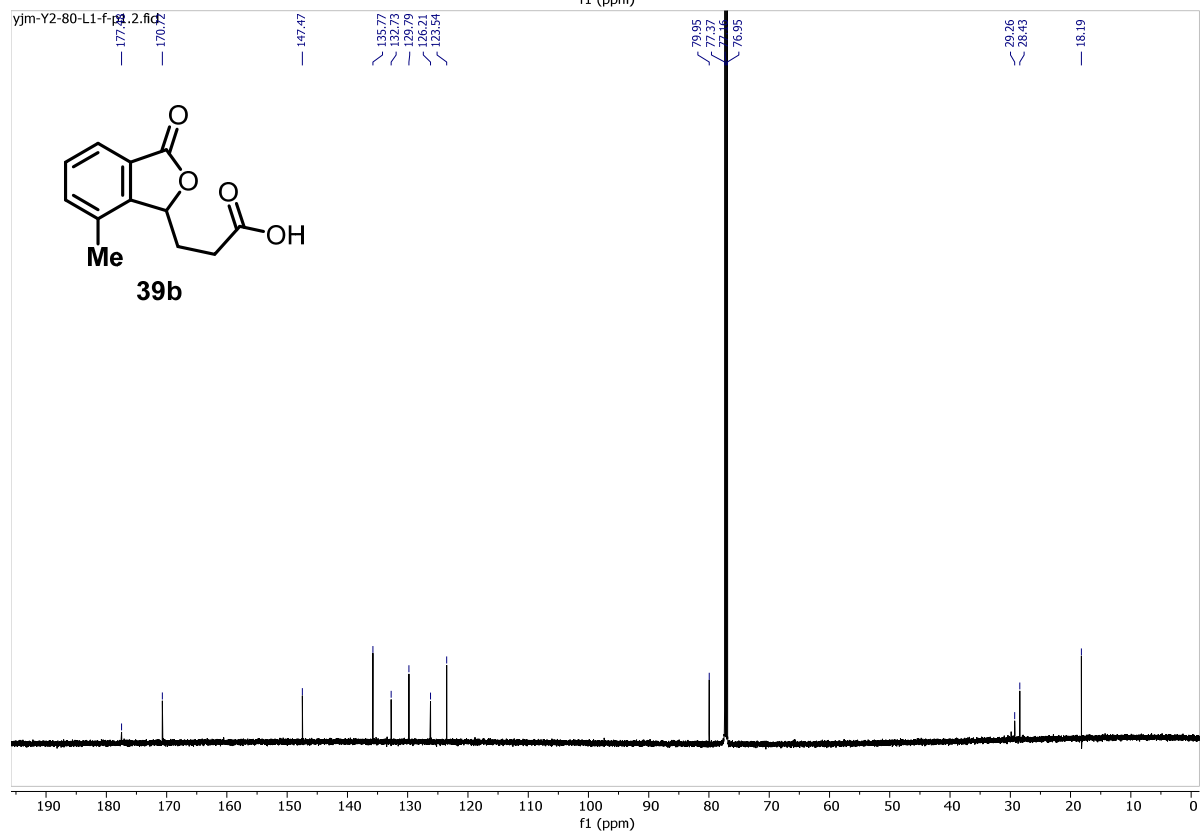

### 3-(6-Fluoro-3-oxo-1,3-dihydroisobenzofuran-1-yl)propanoic acid 40b

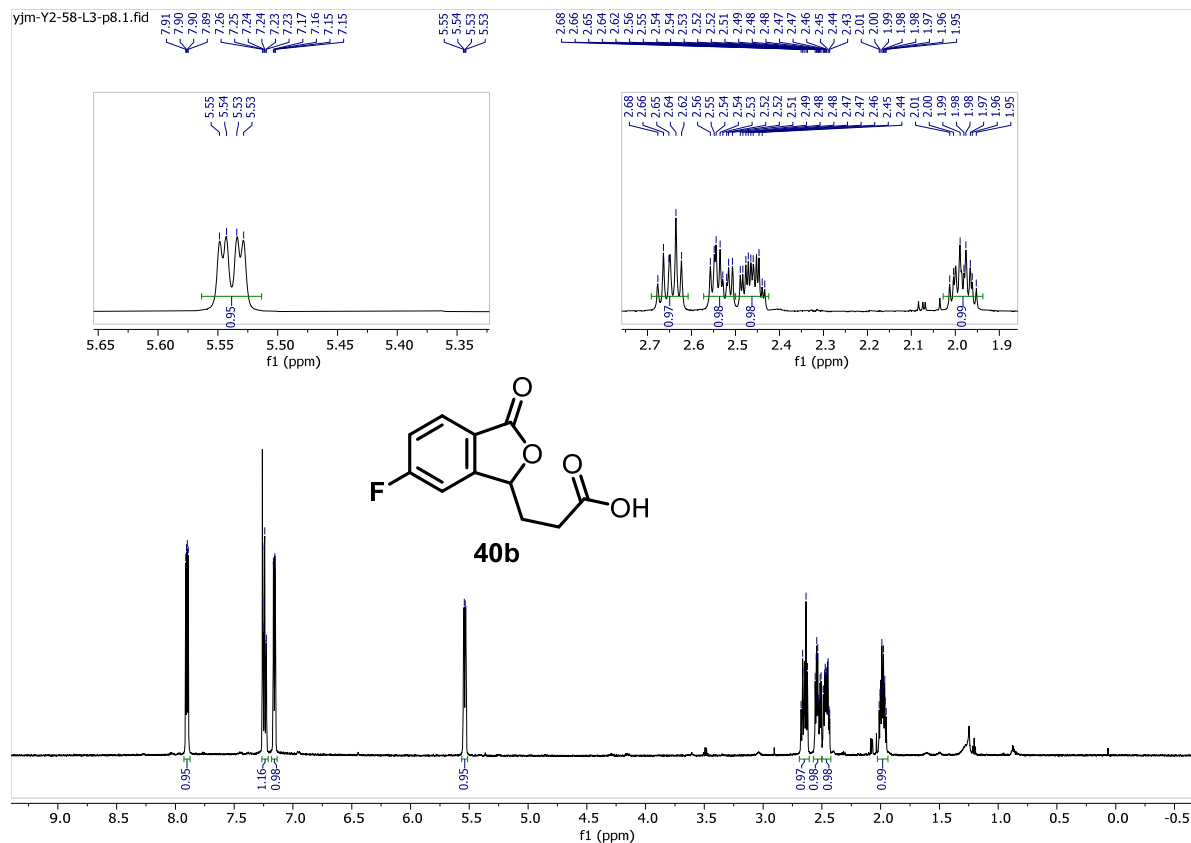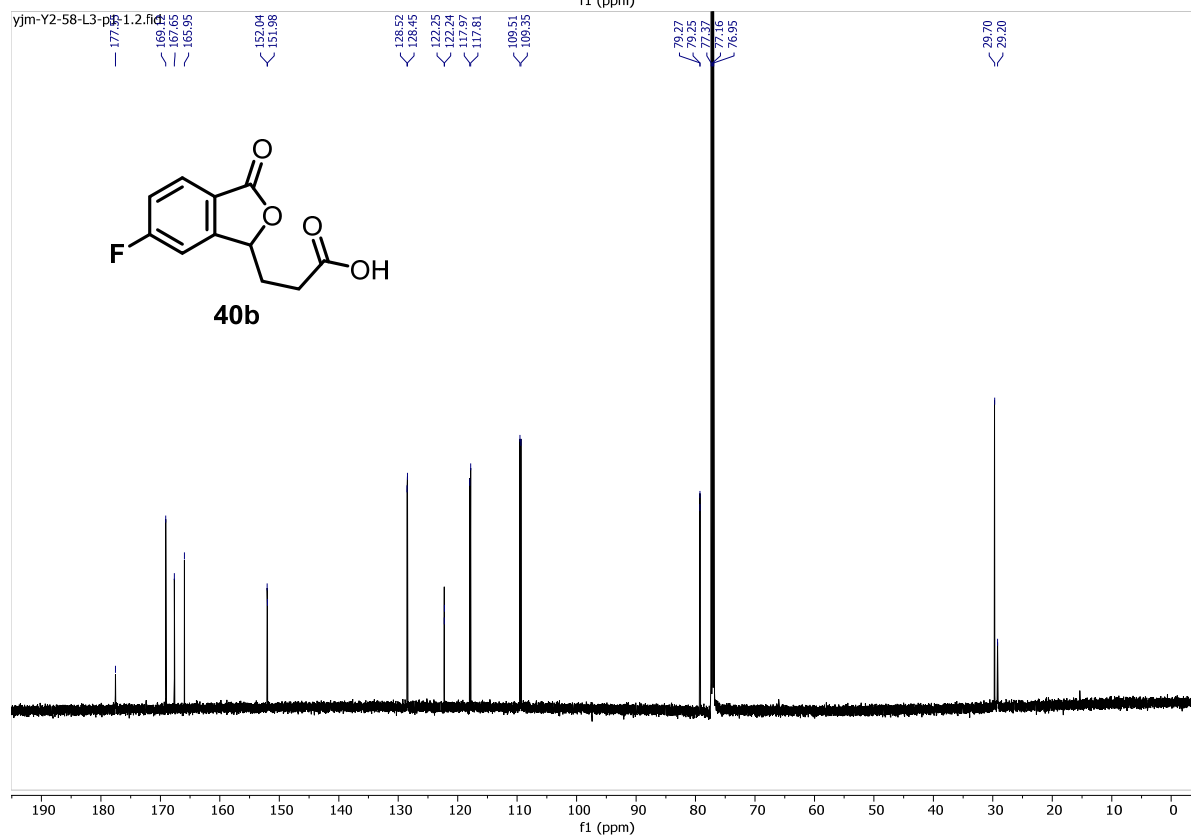

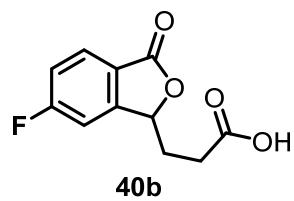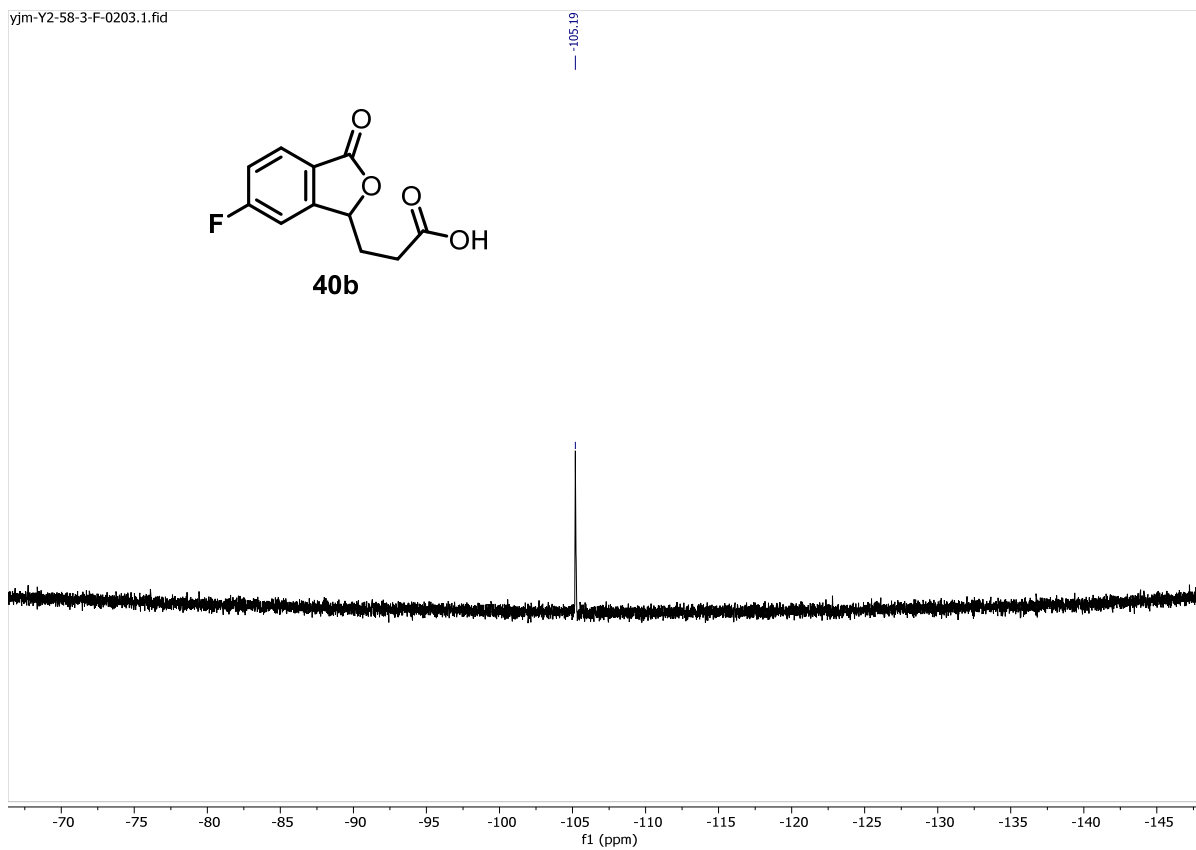

### 3-(6-Chloro-3-oxo-1,3-dihydroisobenzofuran-1-yl)propanoic acid 41b

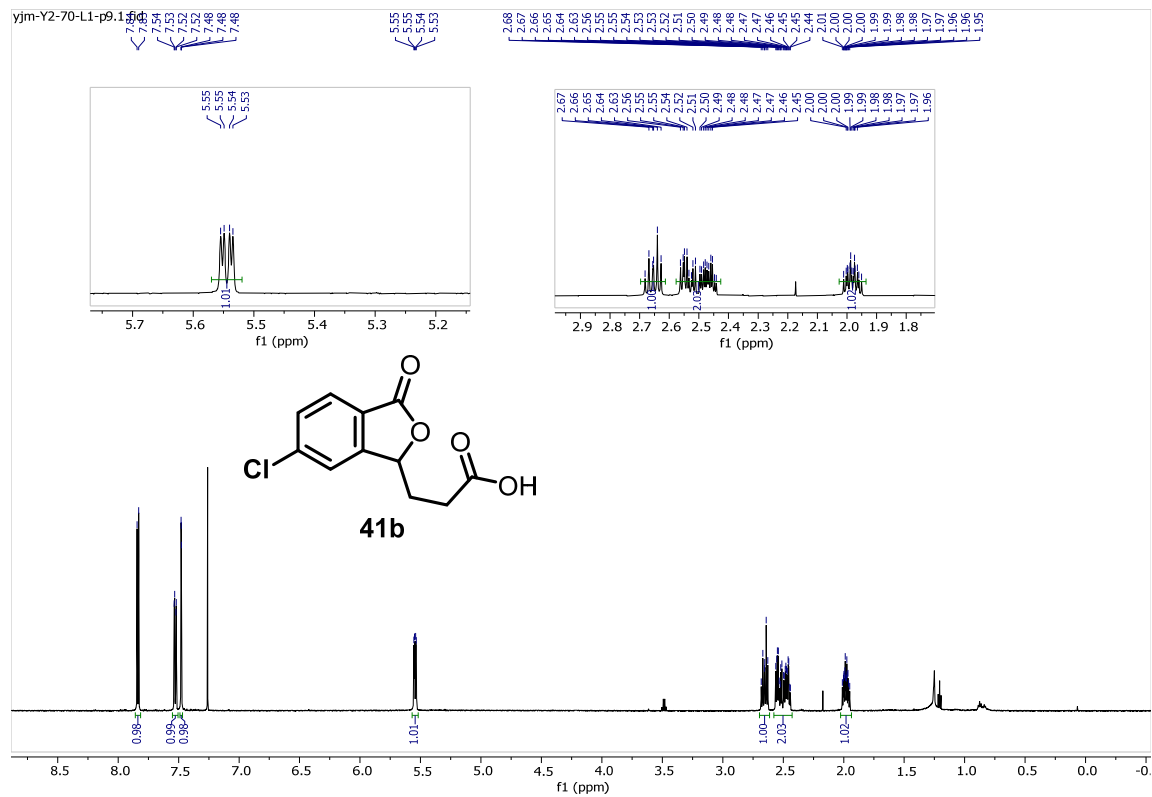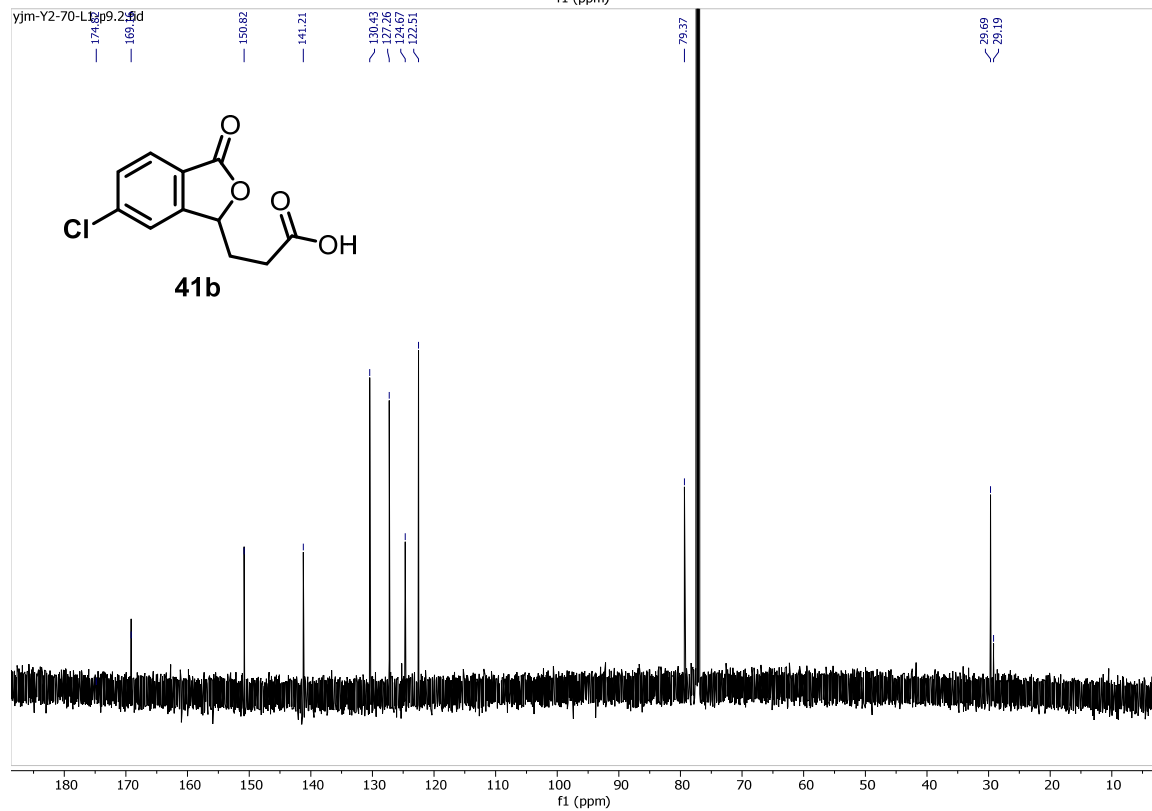

### 3-(3-Oxo-6-phenyl-1,3-dihydroisobenzofuran-1-yl)propanoic acid 42b

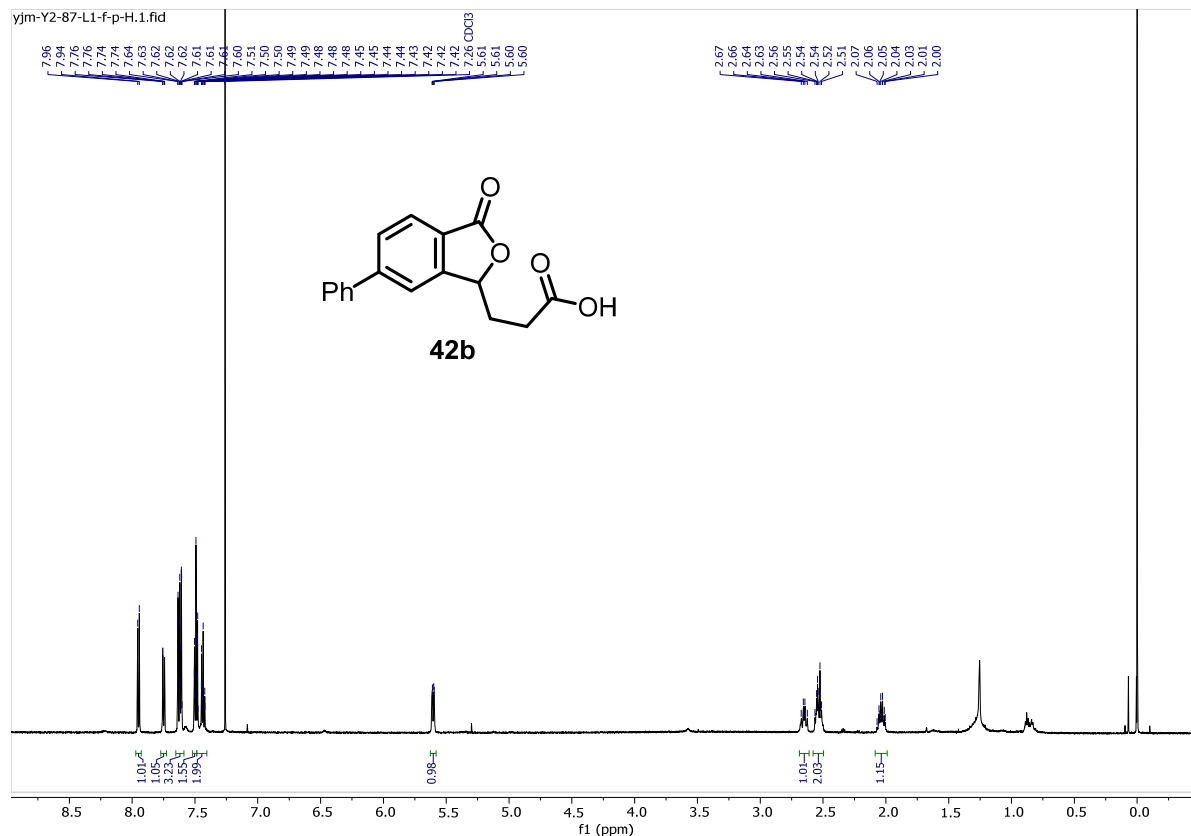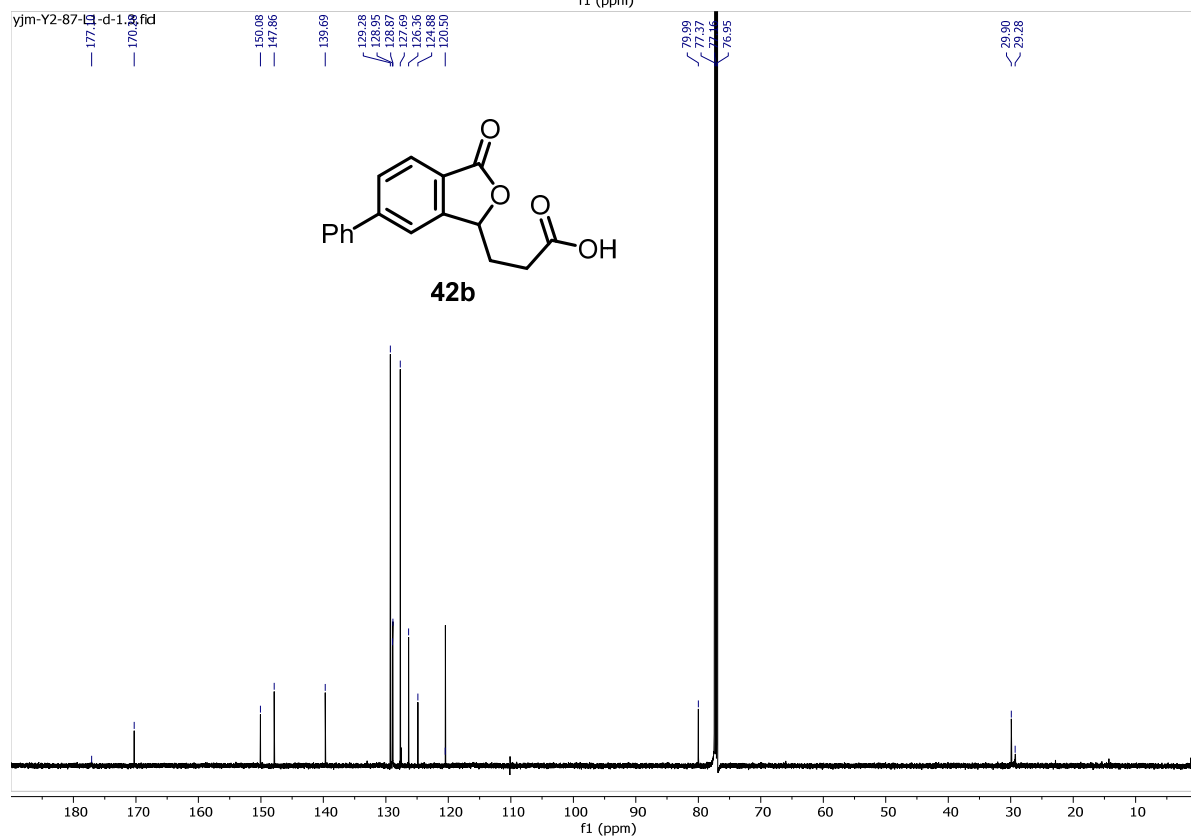

### 3-(3-Oxo-1,3-dihydro-2H-naphtho[2,3-c]furan-1-yl)propanoic acid 43b

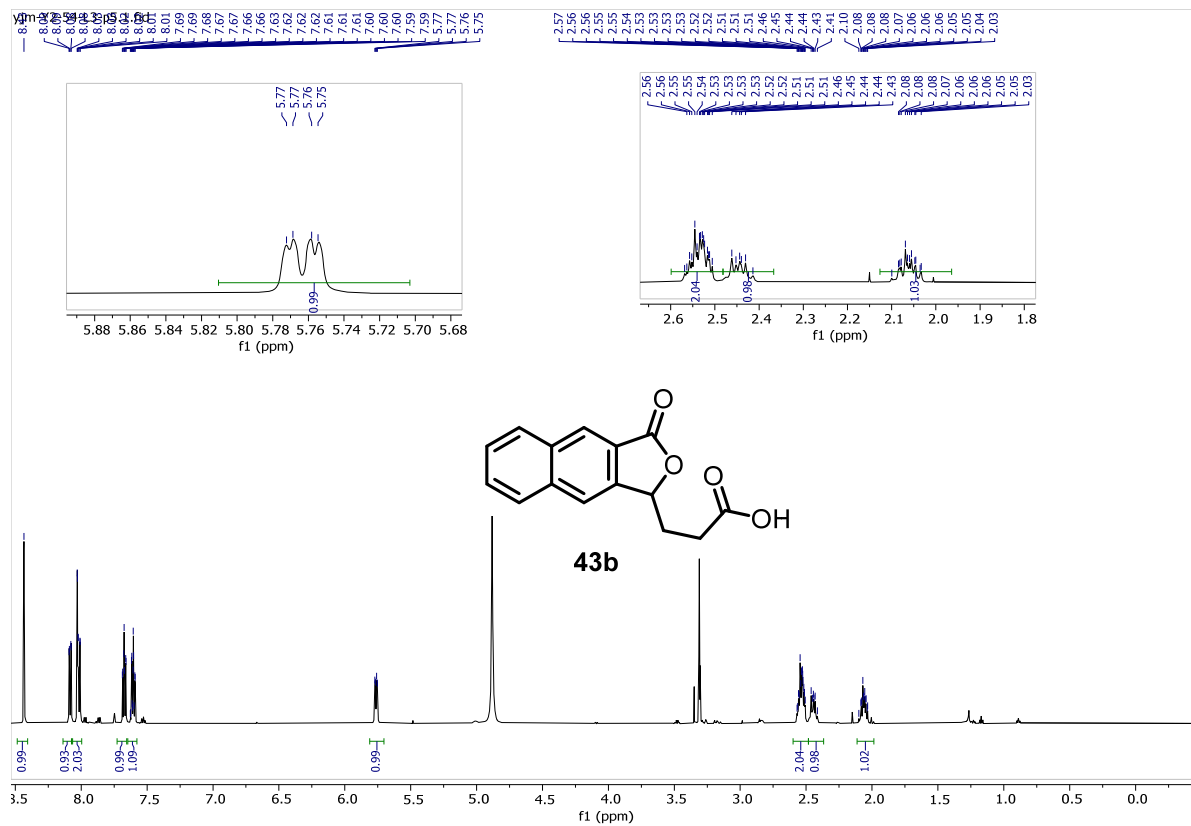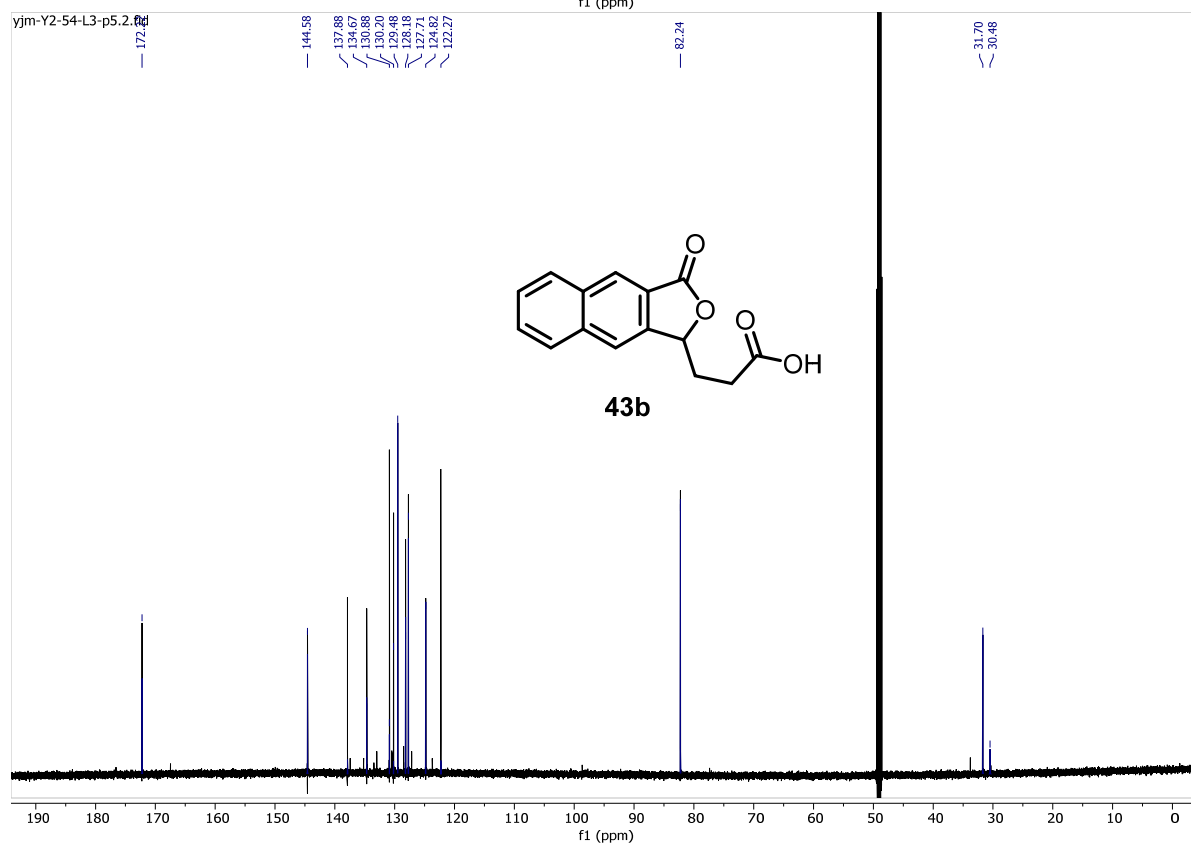

# 3-(3-Oxo-5-(trifluoromethyl)-1,3-dihydroisobenzofuran-1-yl)propanoic acid 44b

yjm-Y2-79-L1-e-1.1.fid

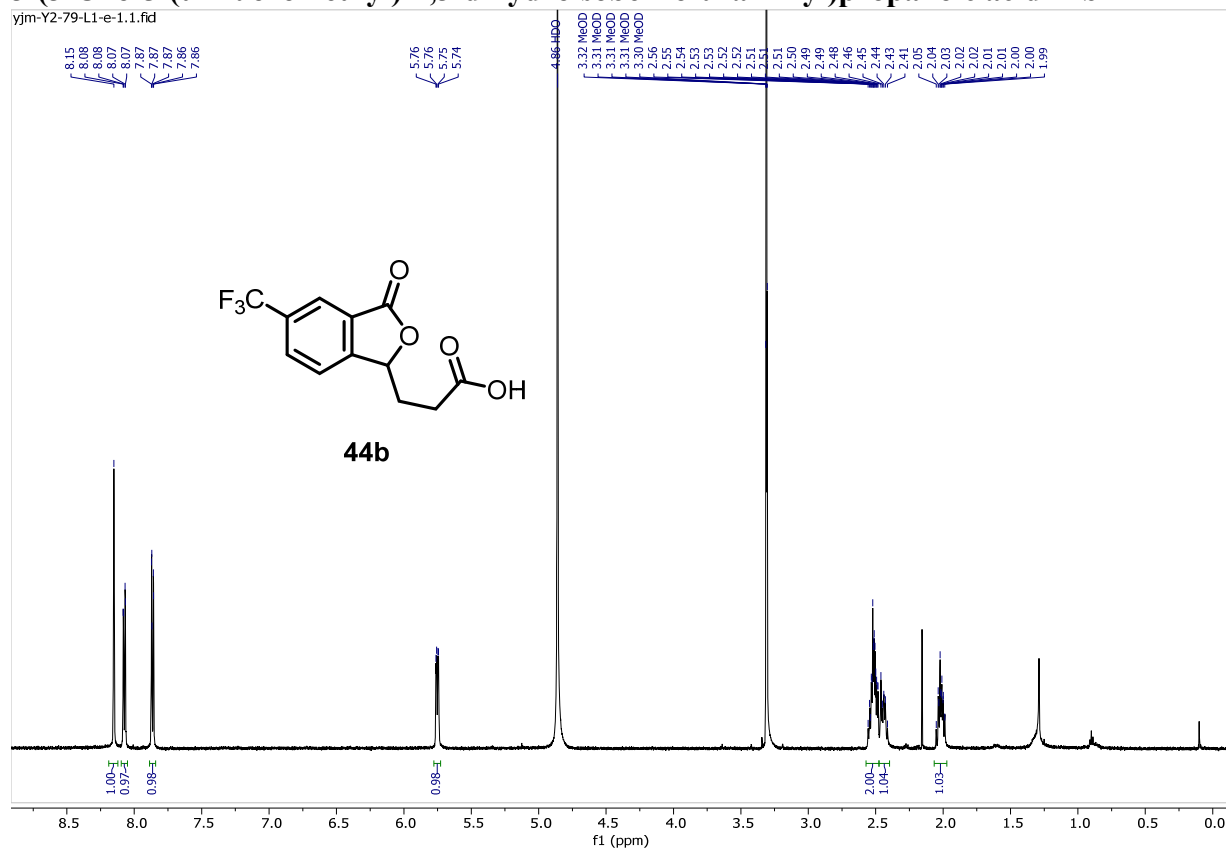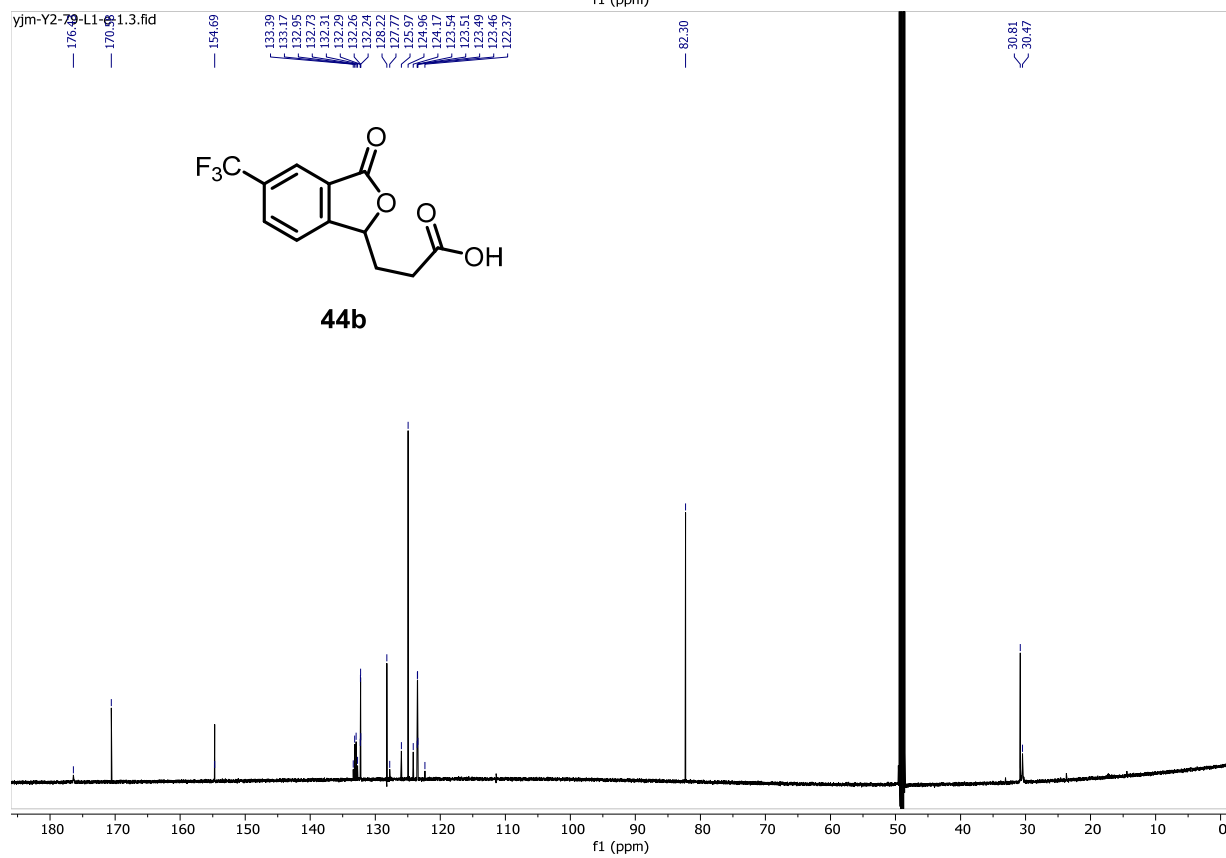



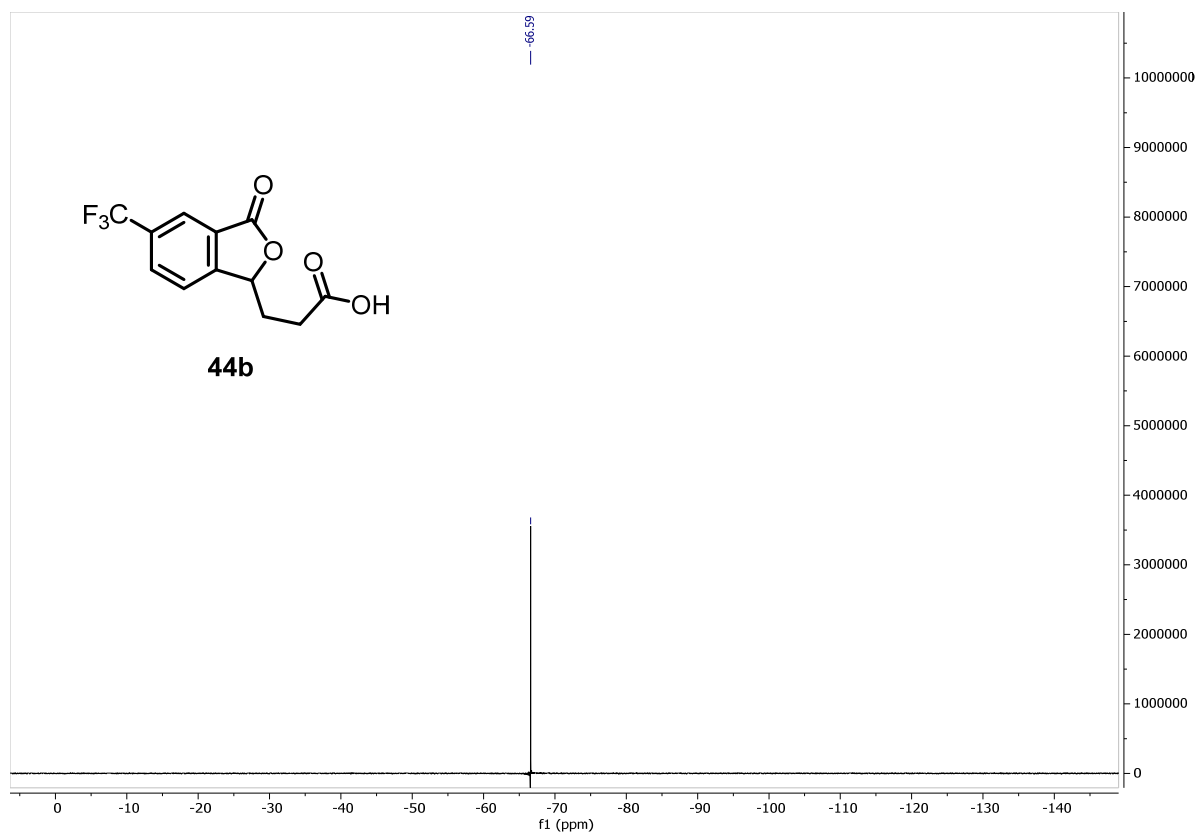

## 2-Methylheptanedioic acid 46

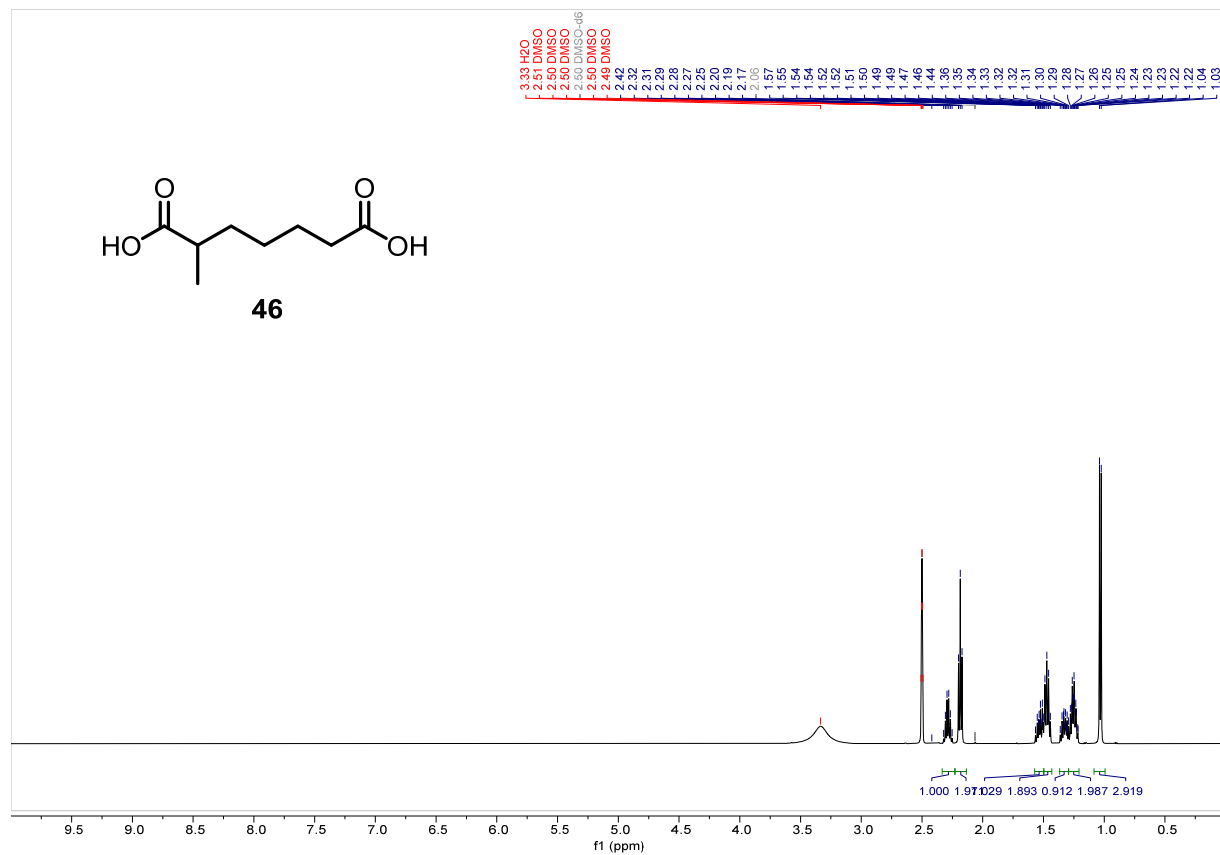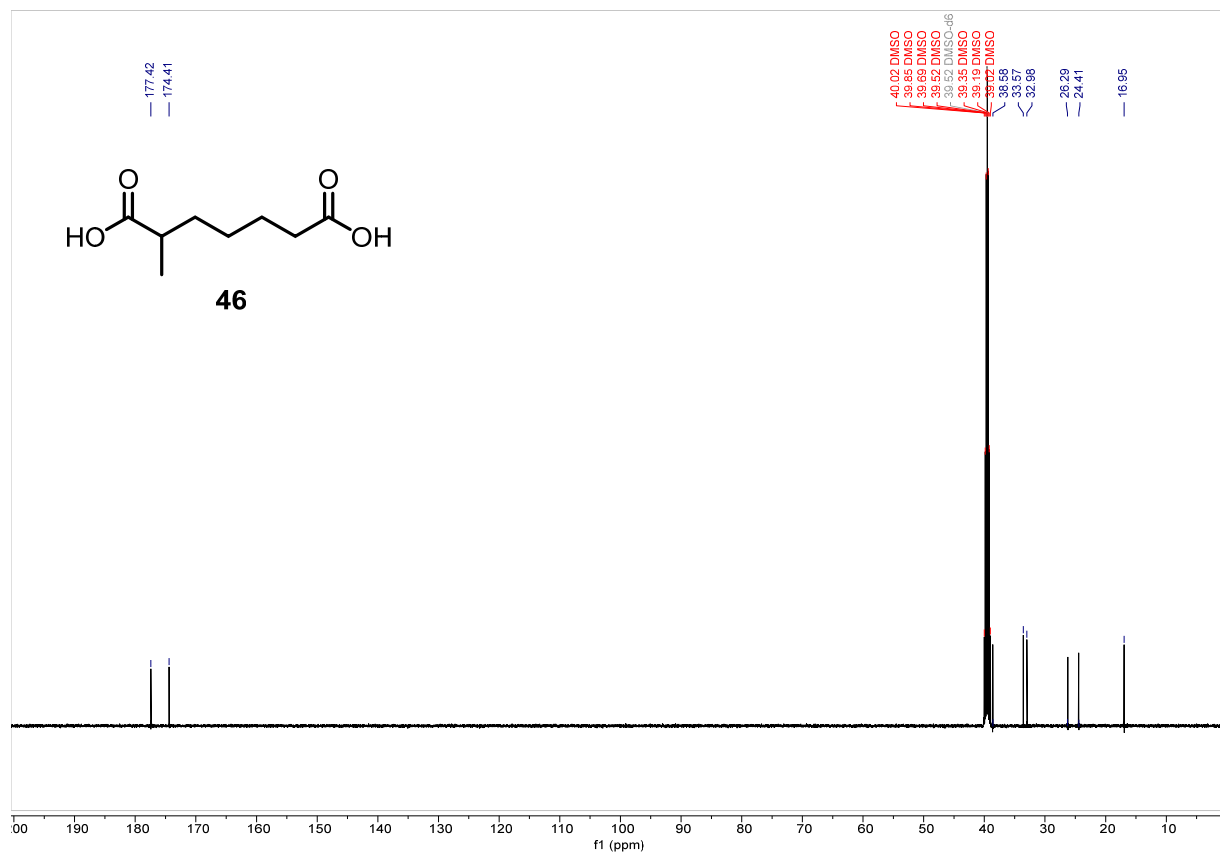

# 2-(*tert*-Butyl)heptanedioic acid 48

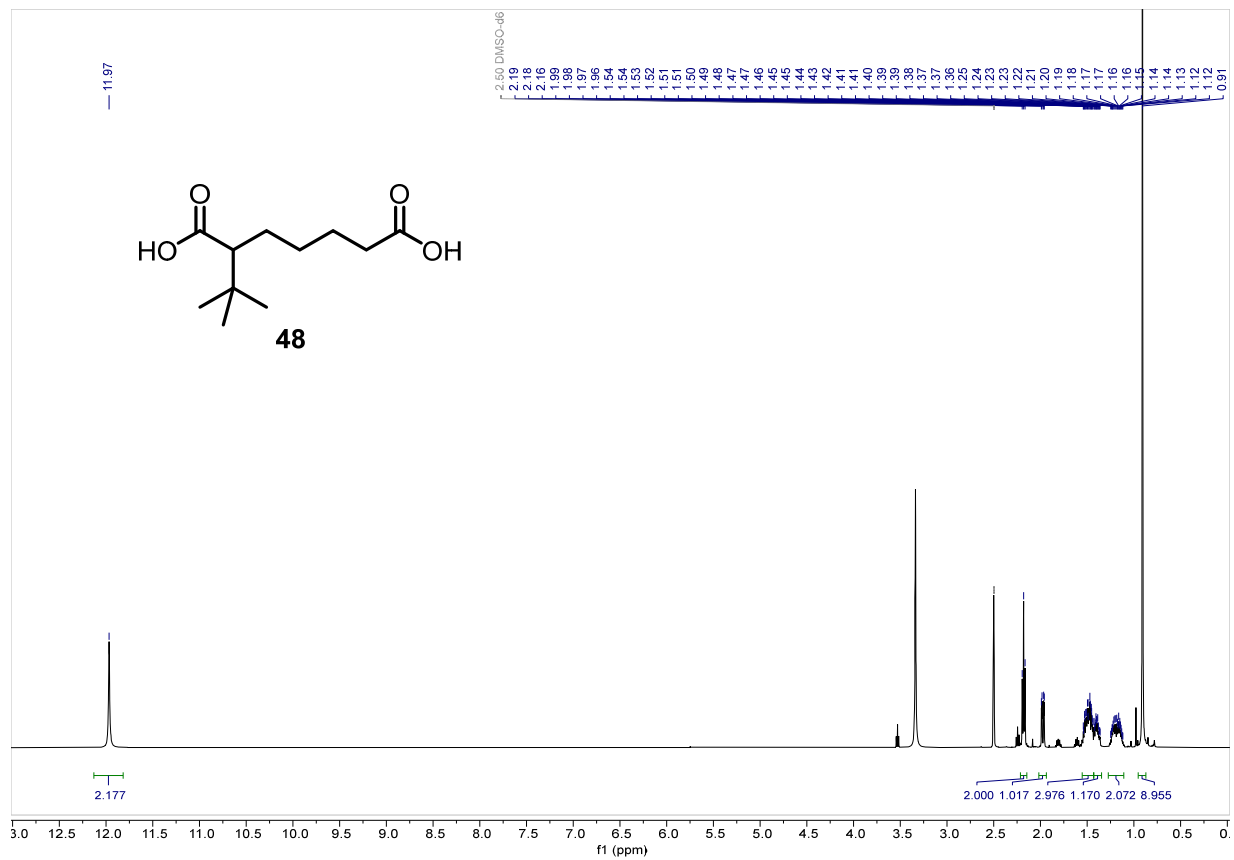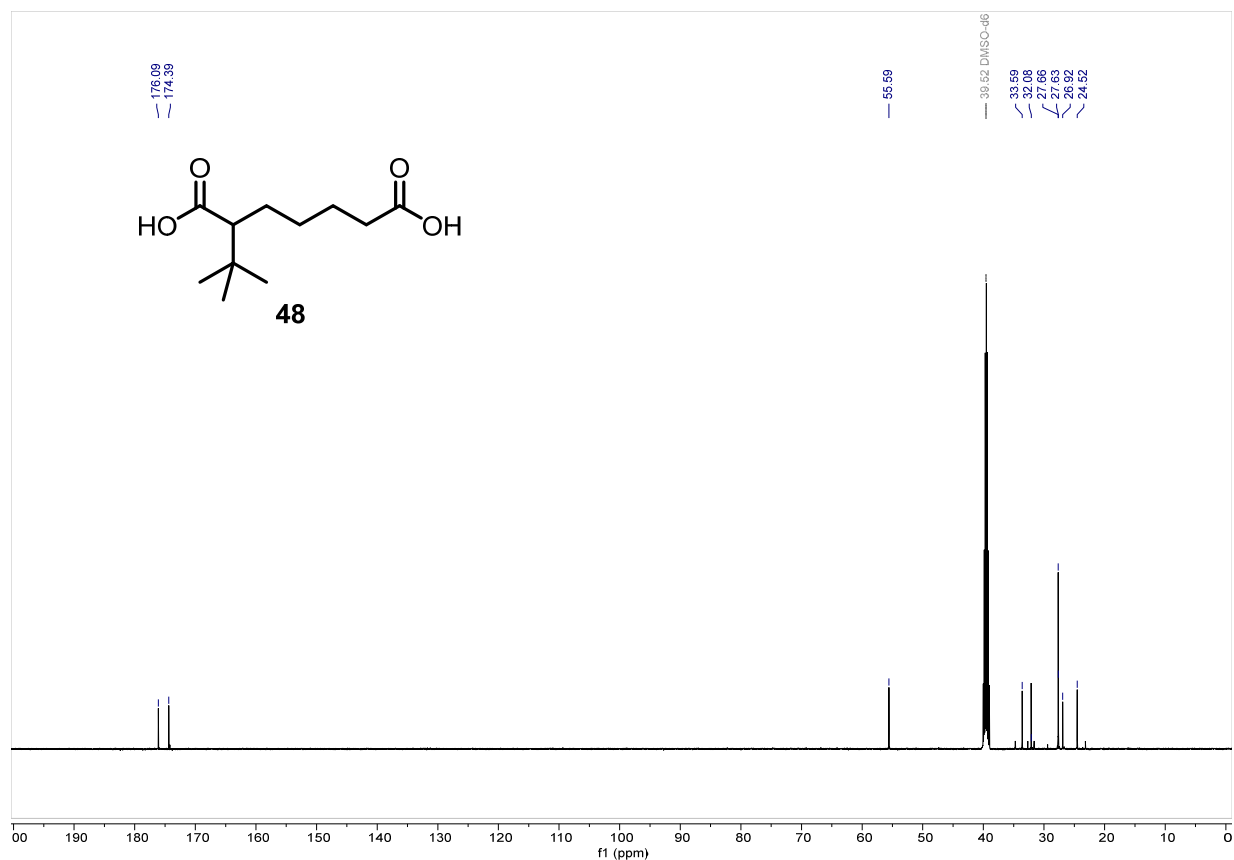



# 1-(4-Carboxybutyl)cyclobutane-1-carboxylic acid 49

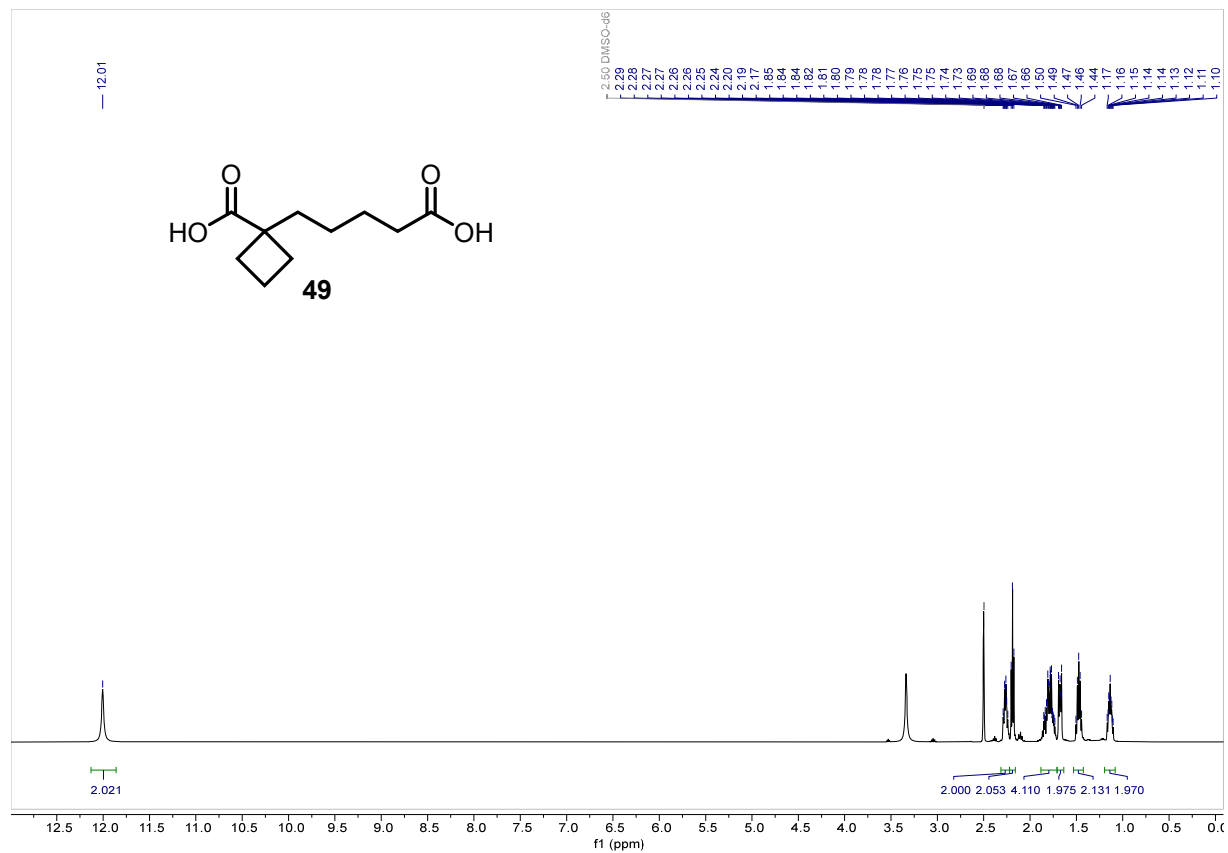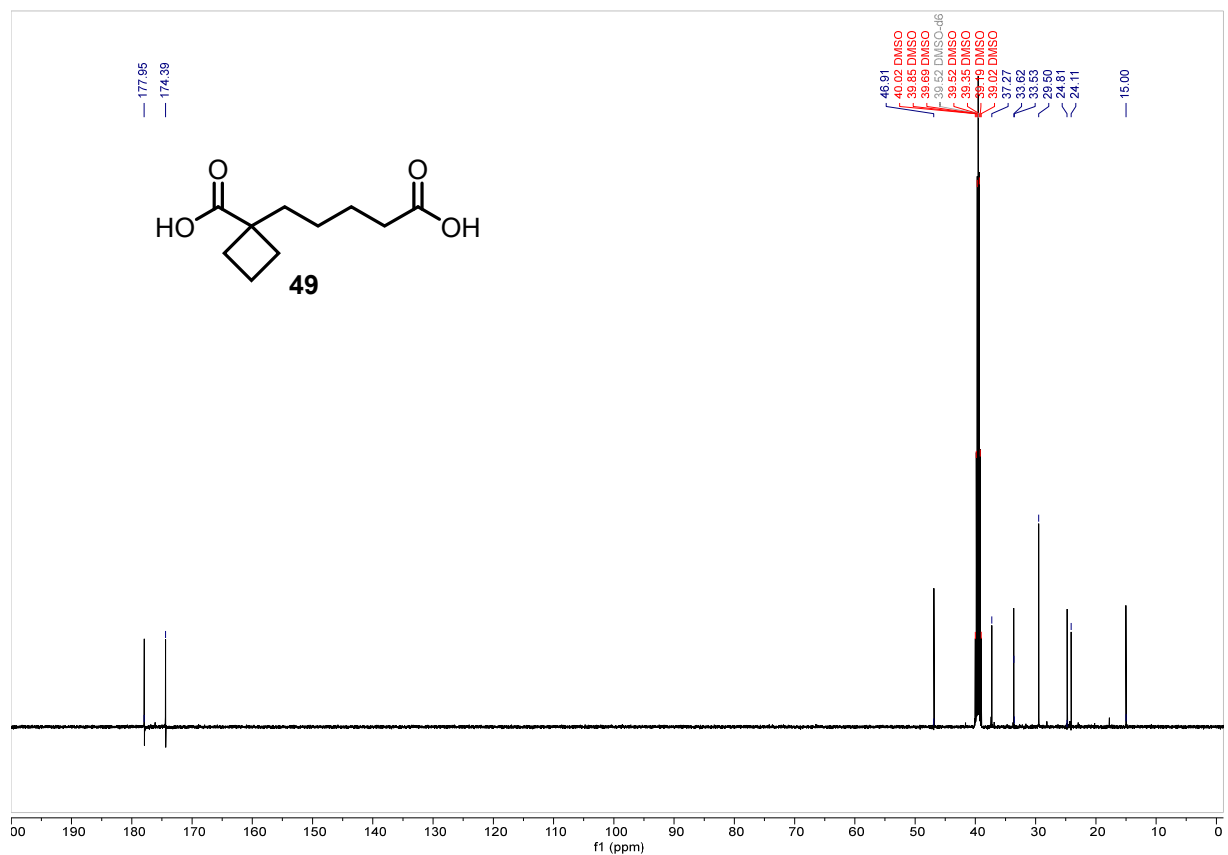

### 3-Benzylpentanedioic acid 52

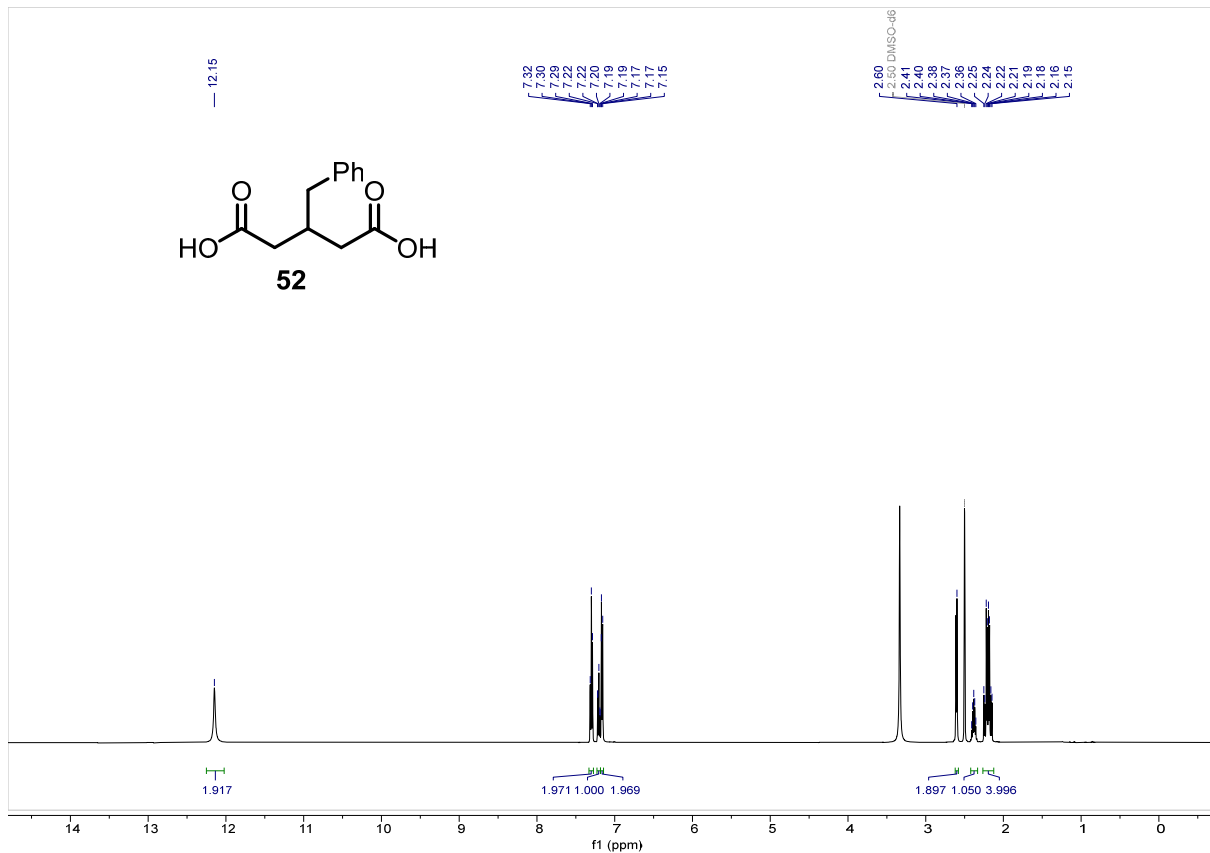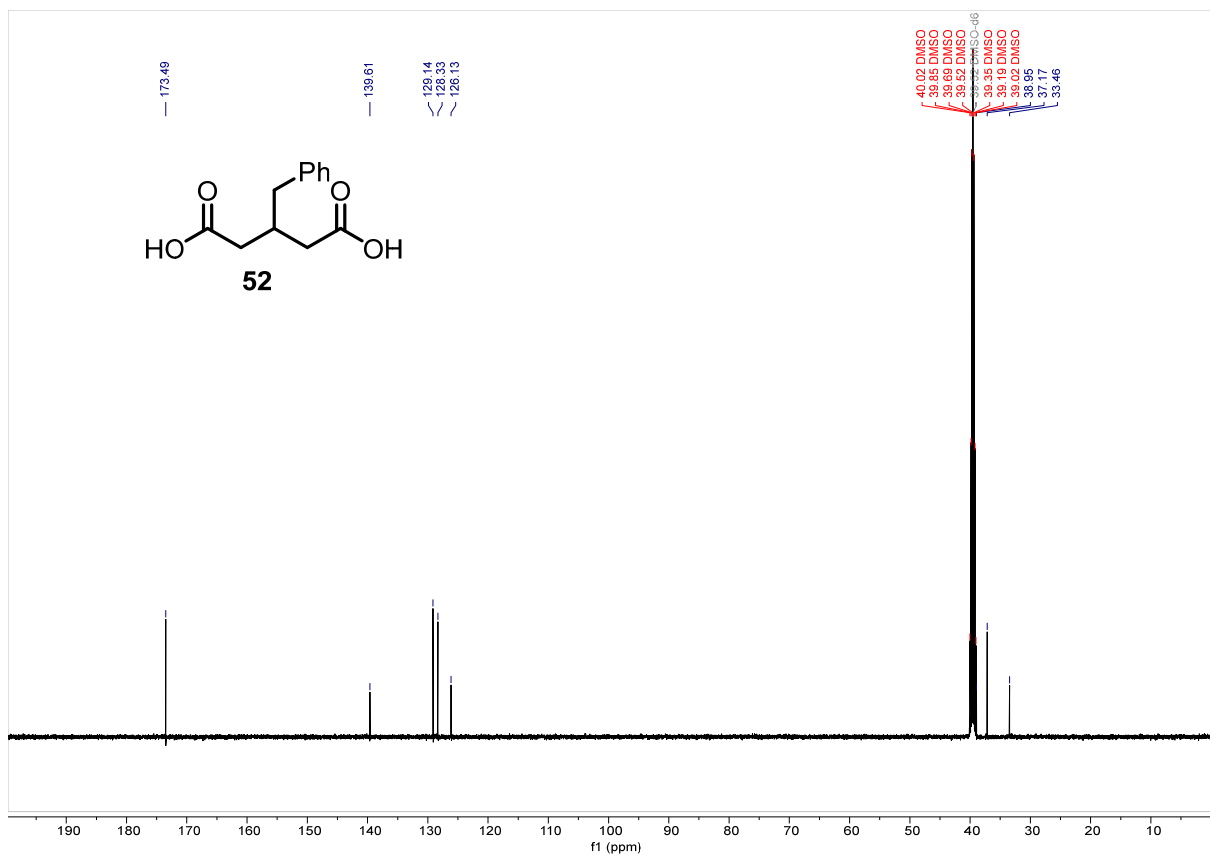

# 4-(Carboxymethyl)cyclohexane-1-carboxylic acid **53**

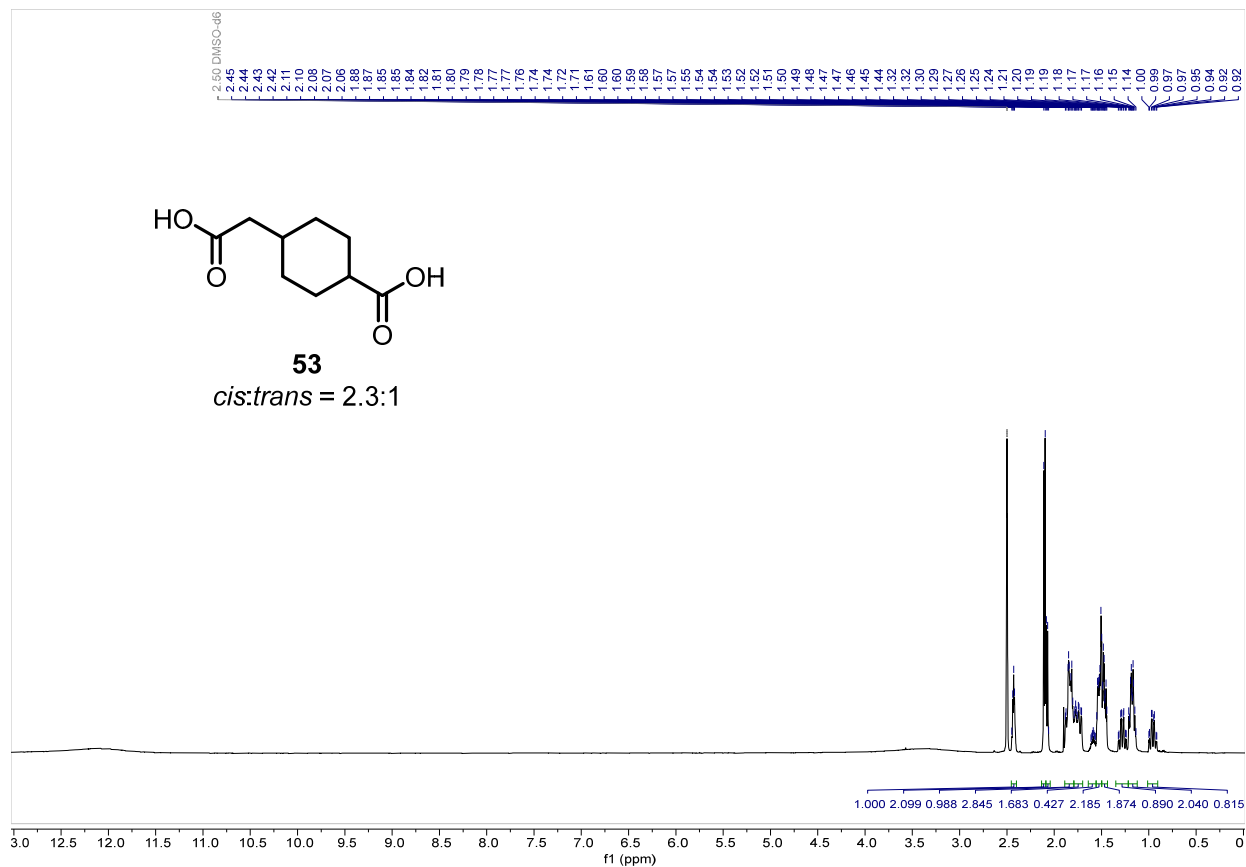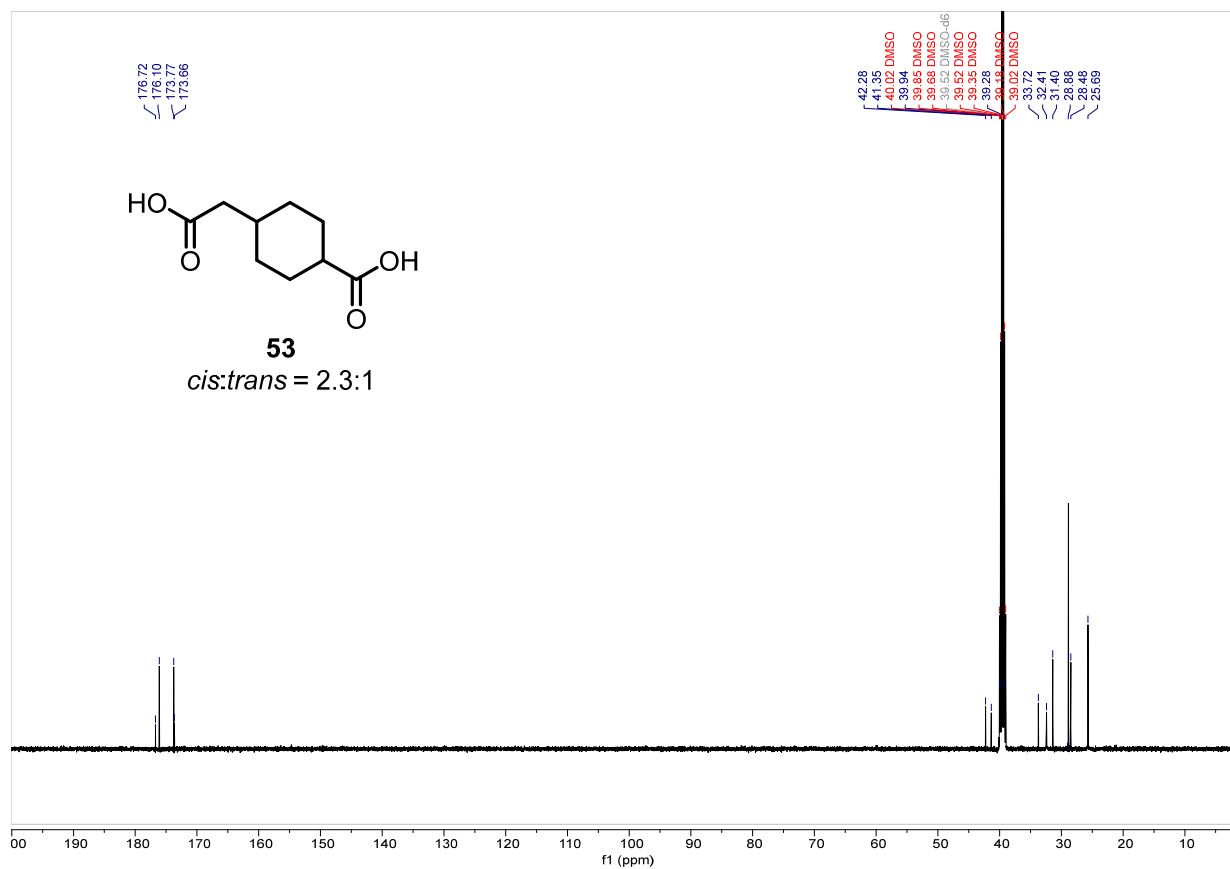

# Ethyl 1-methyl-2-methylenecyclopentane-1-carboxylate **56**

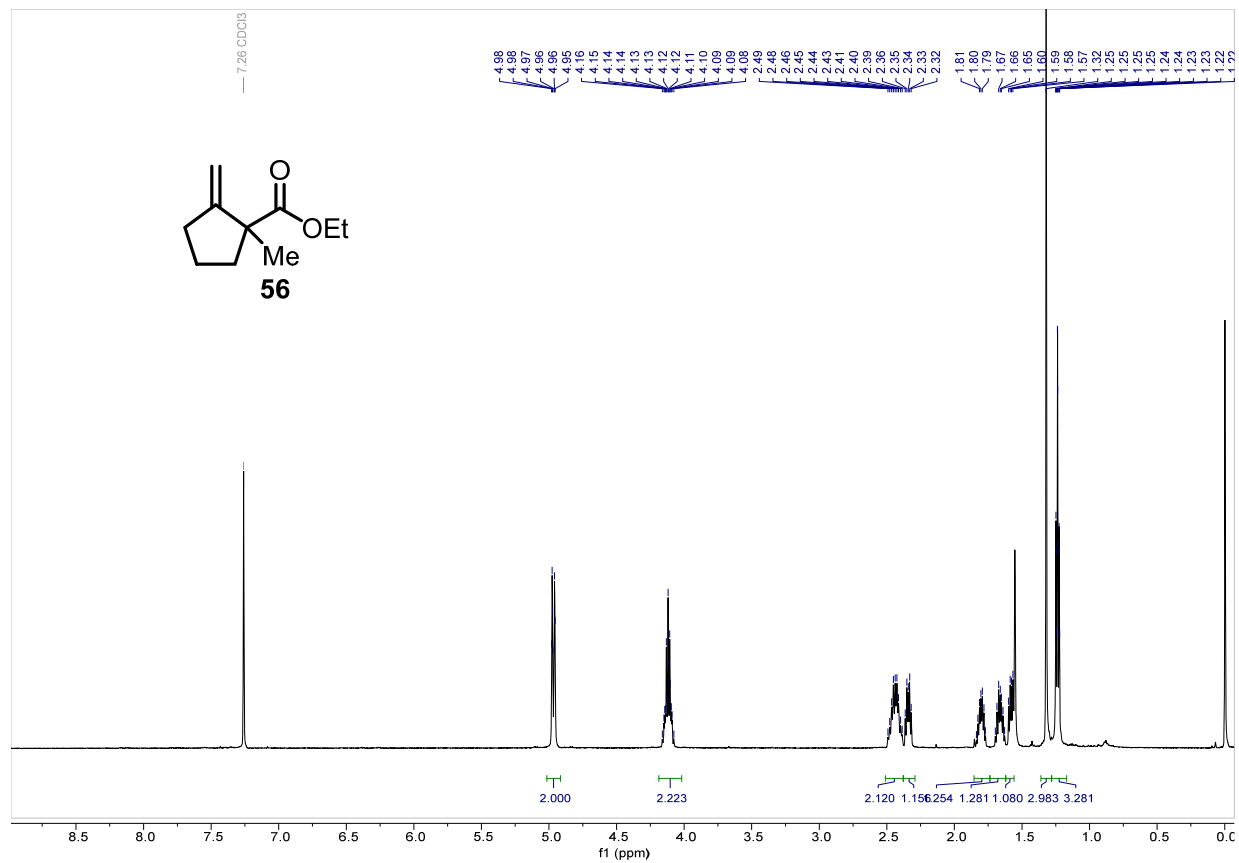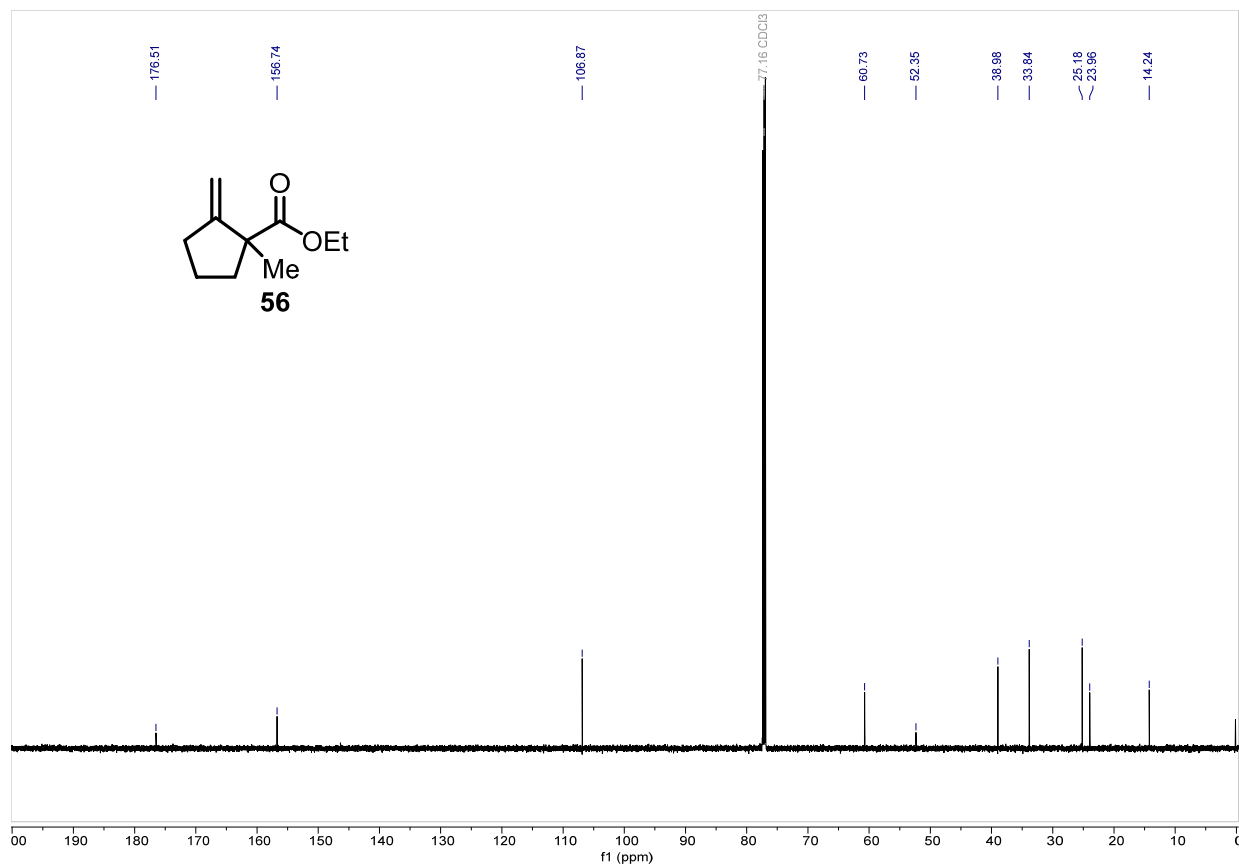



# Ethyl 4-methyl-1-oxaspiro[2.4]heptane-4-carboxylate **57**

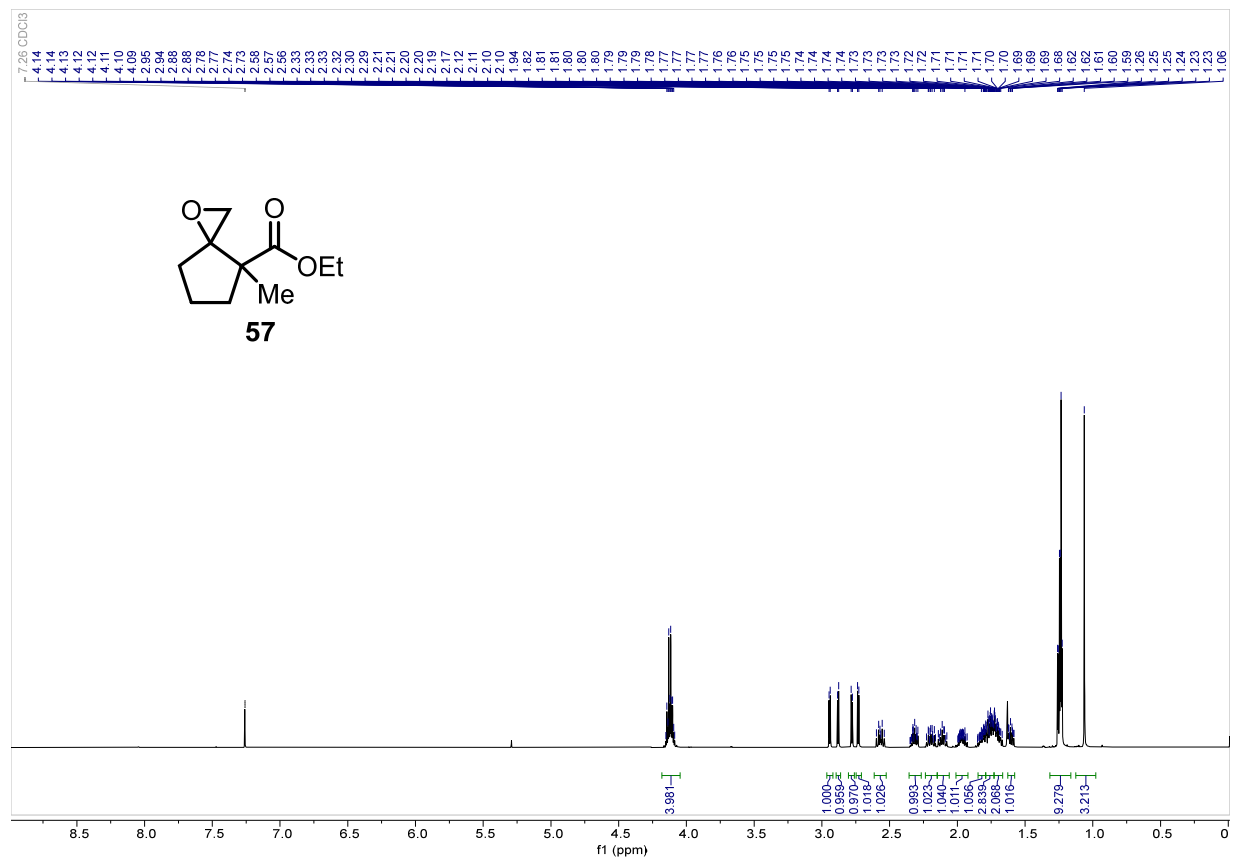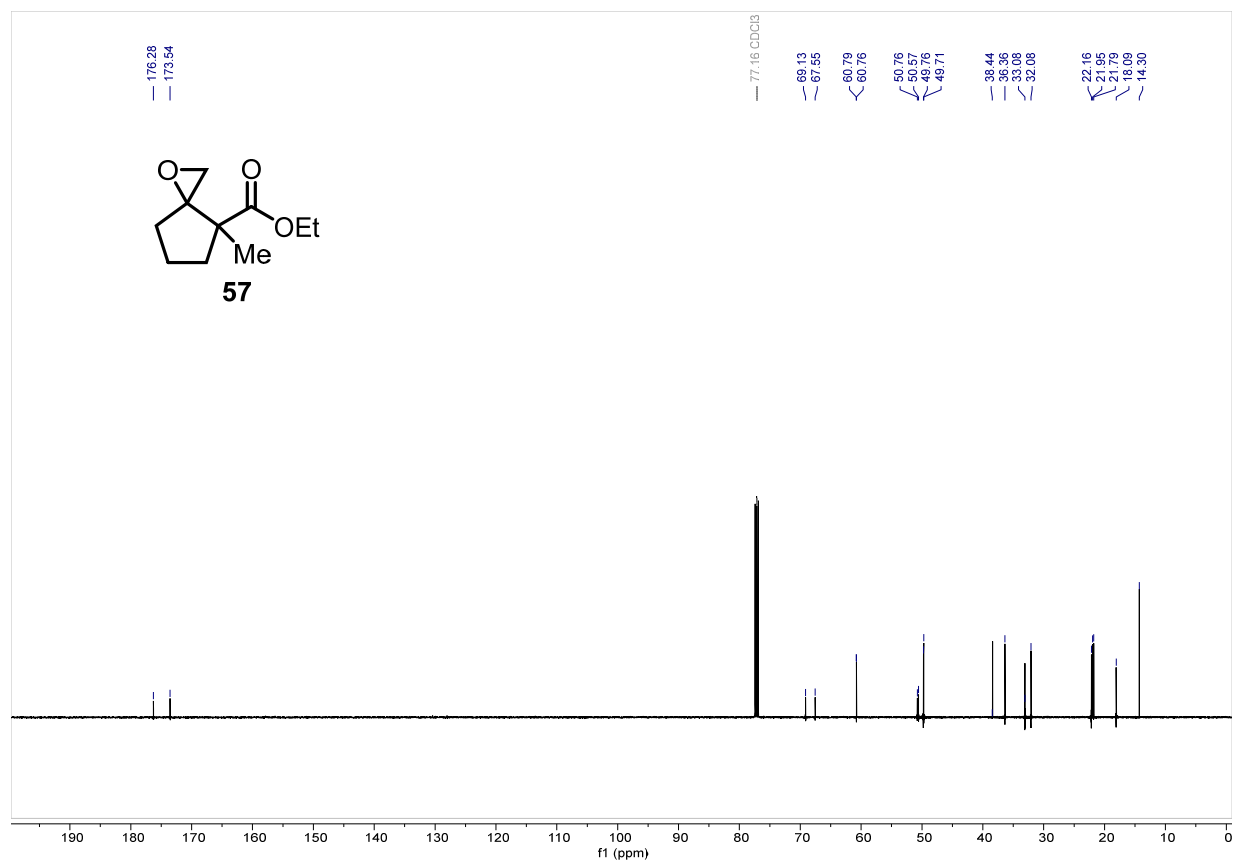

# Ethyl 2-(hydroxymethyl)-1-methylcyclopent-2-ene-1-carboxylate **58**

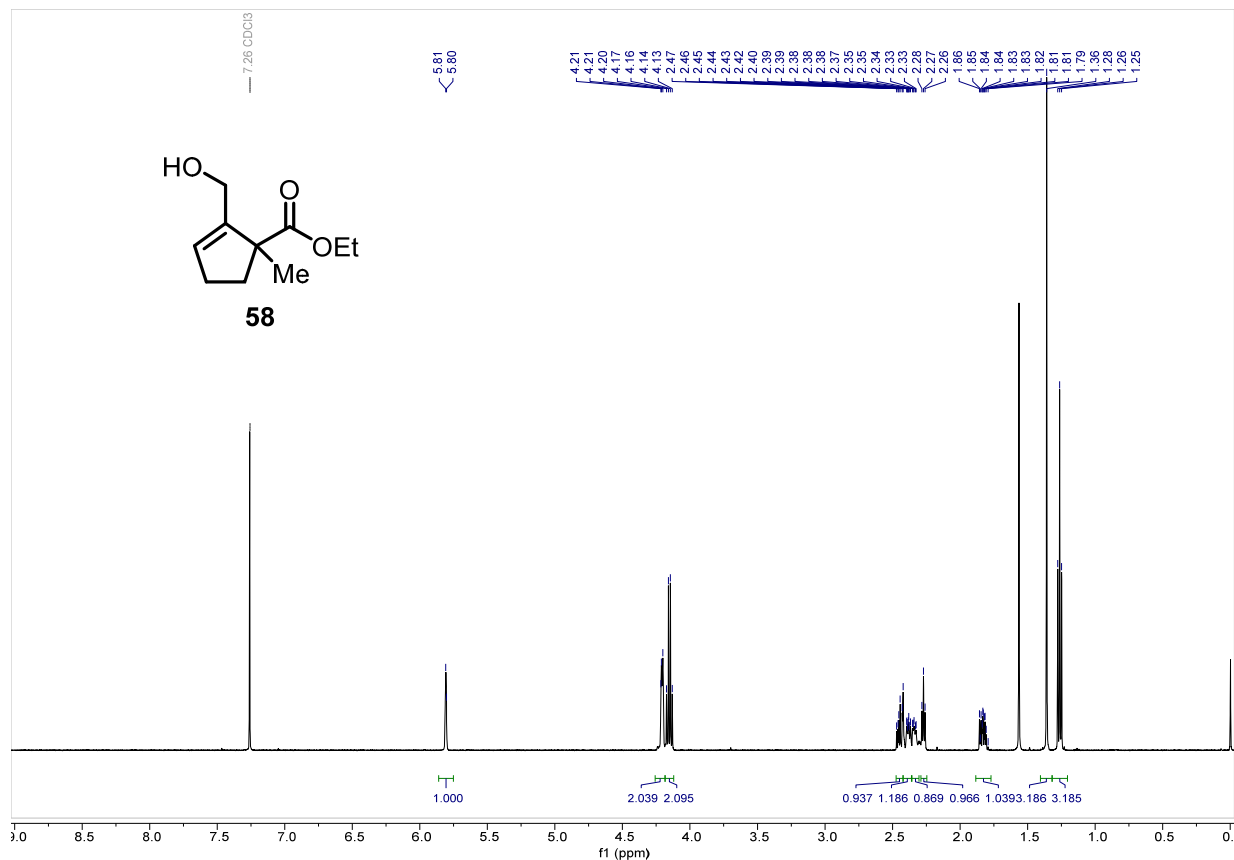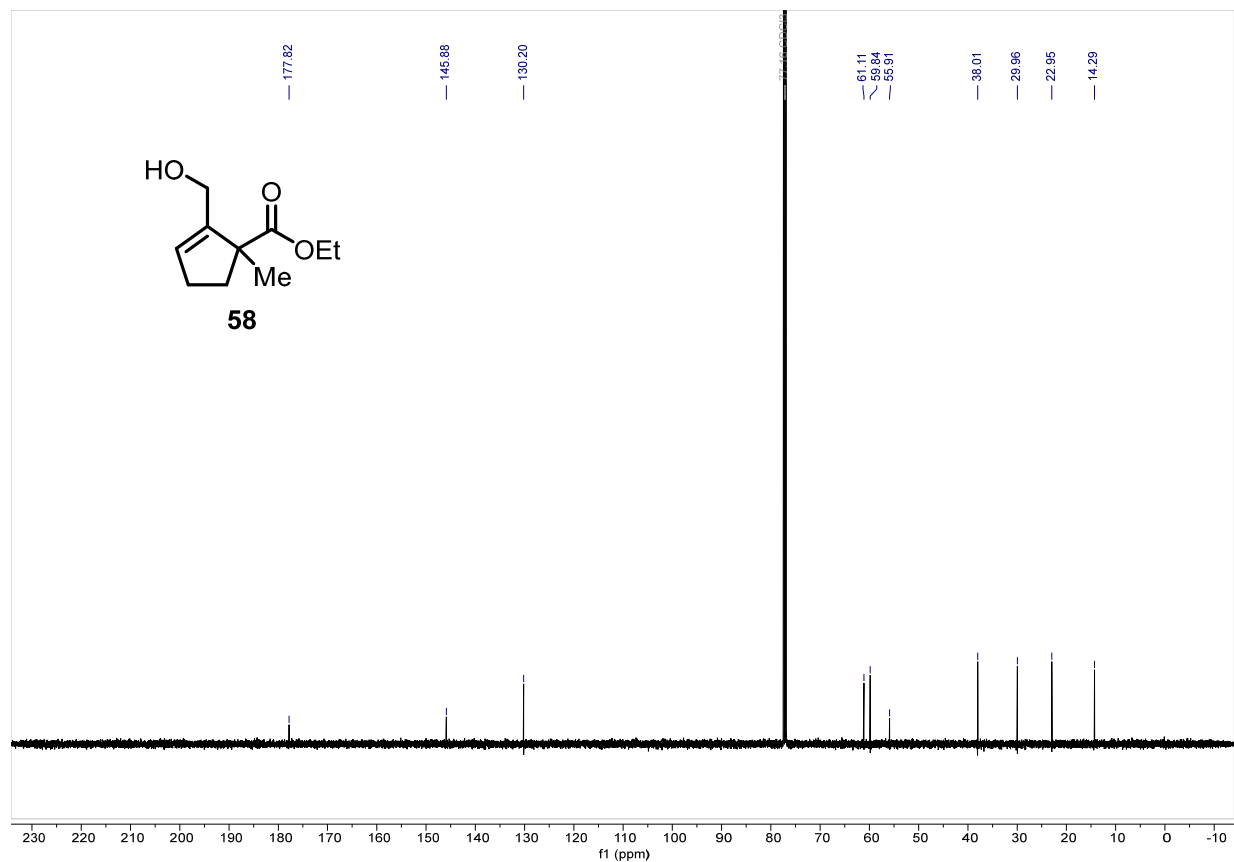

# Ethyl 3-(2-ethoxy-2-oxoethyl)-1,2-dimethylcyclopent-2-ene-1-carboxylate **59**

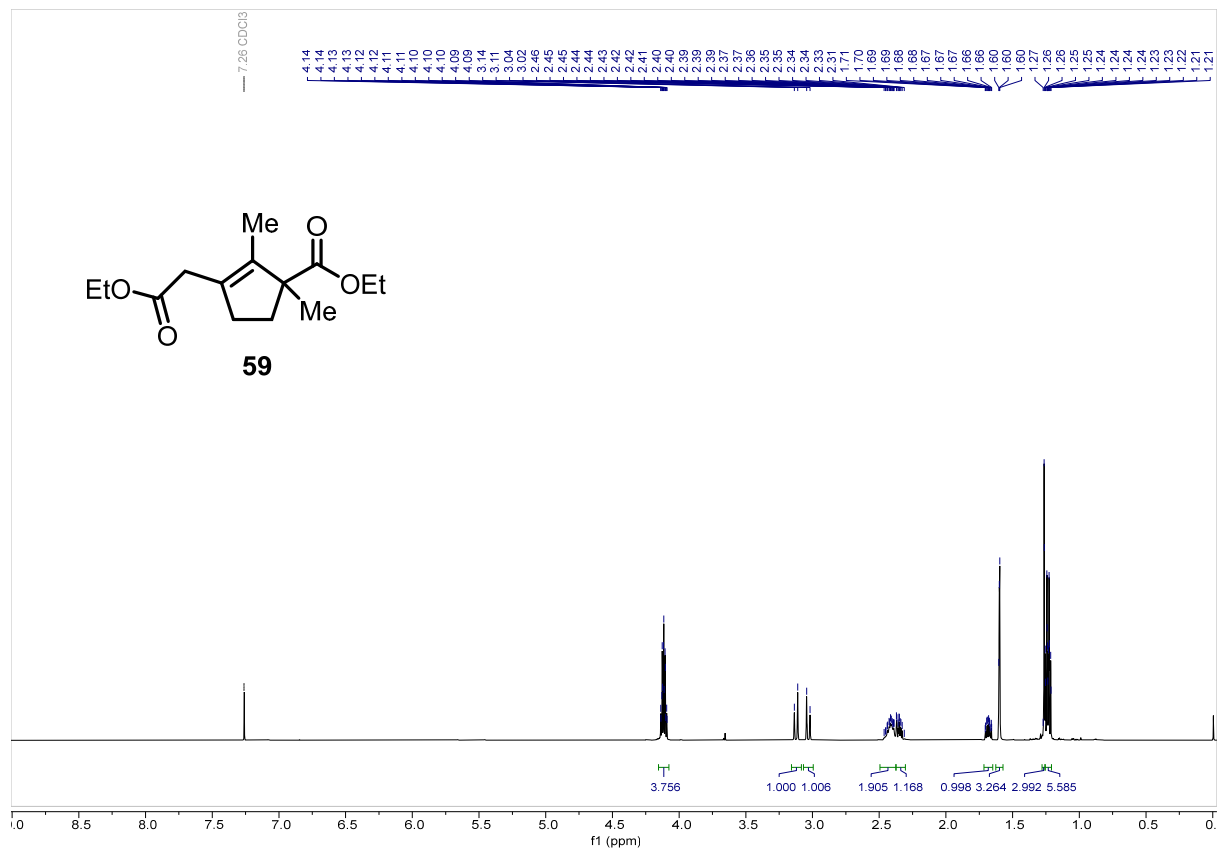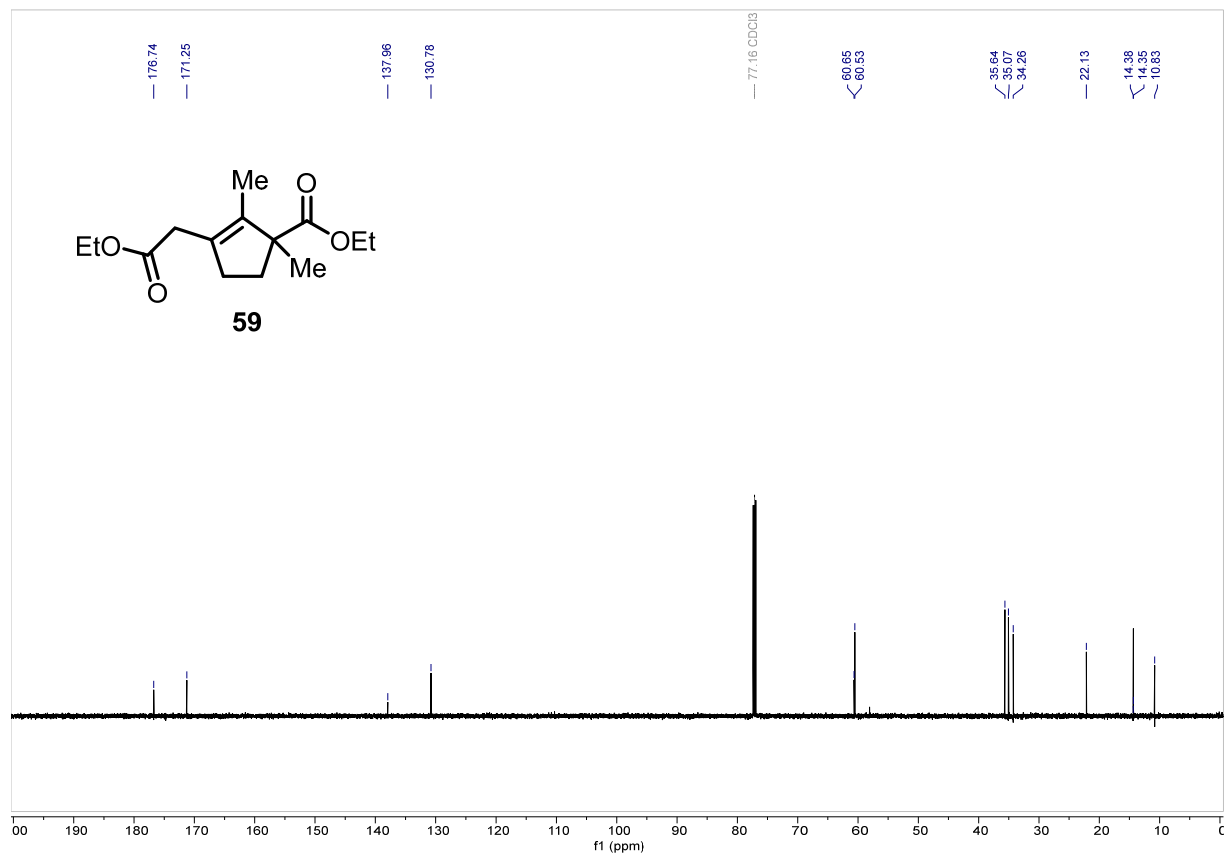

# Ethyl 3-(2-ethoxy-2-oxoethyl)-1,2-dimethylcyclopentane-1-carboxylate 60

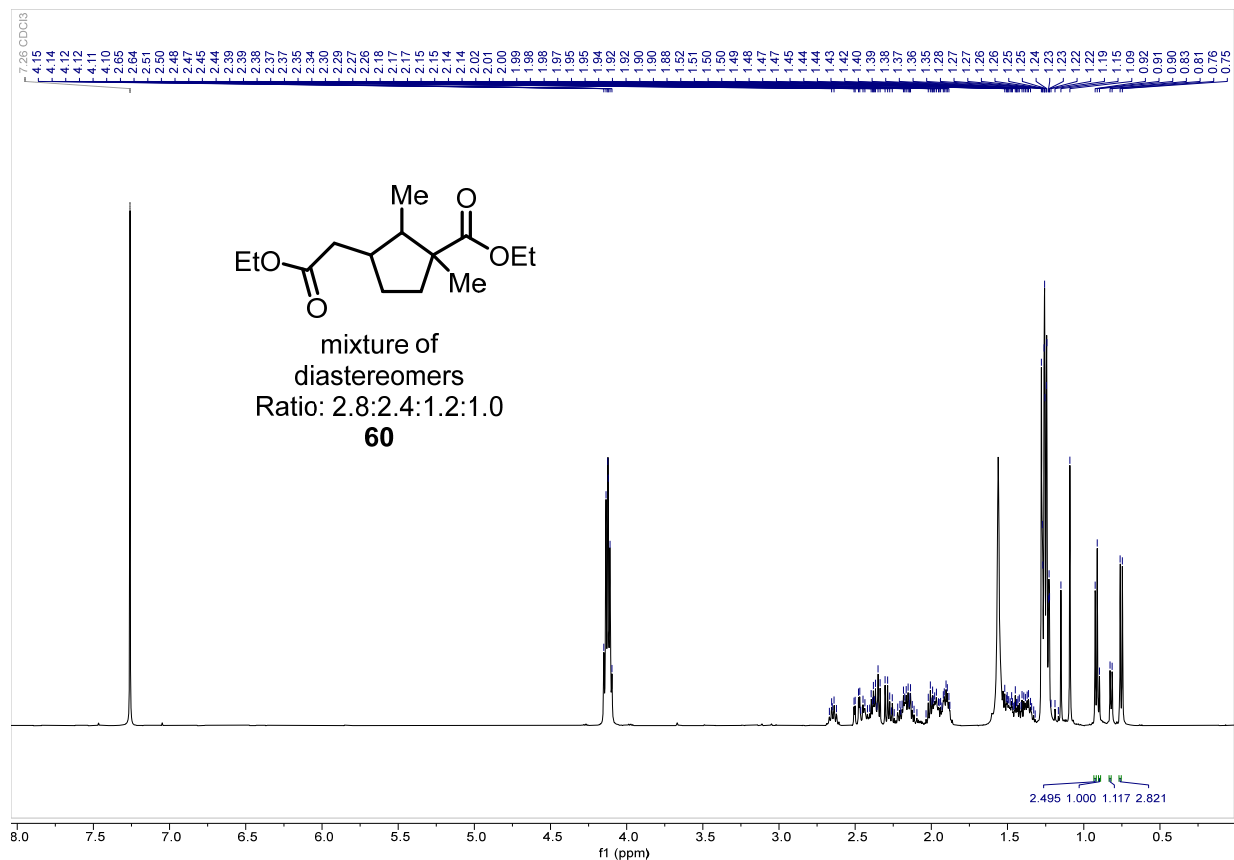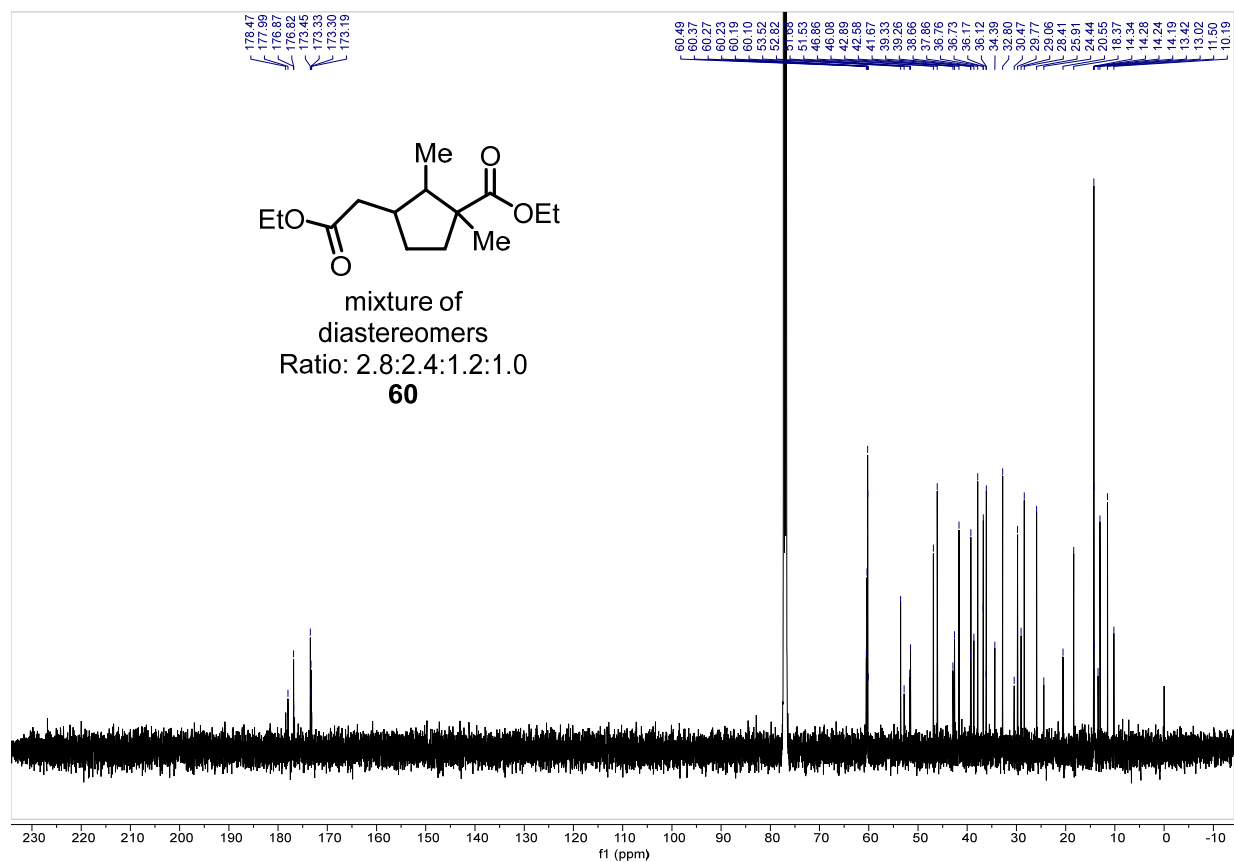

### 3-(Carboxymethyl)-1,2-dimethylcyclopentane-1-carboxylic acid **61**

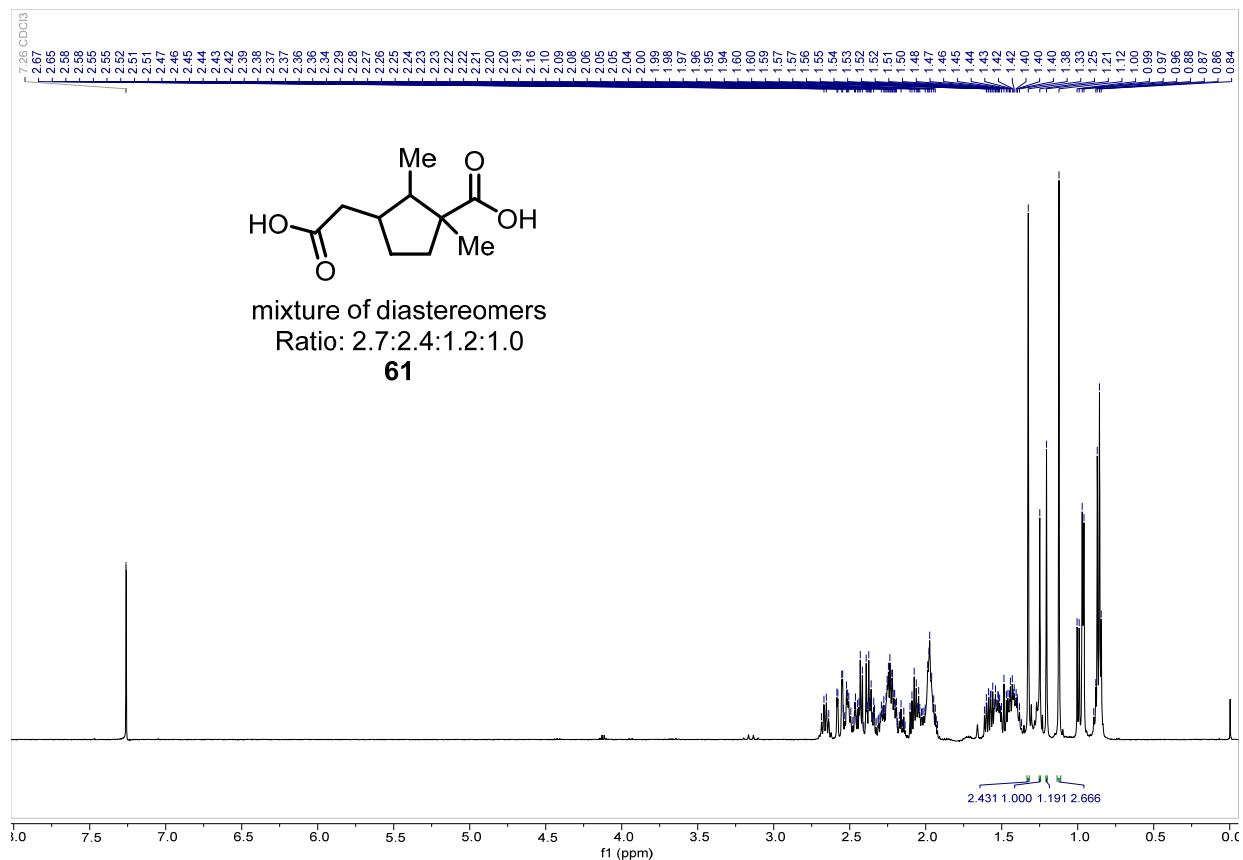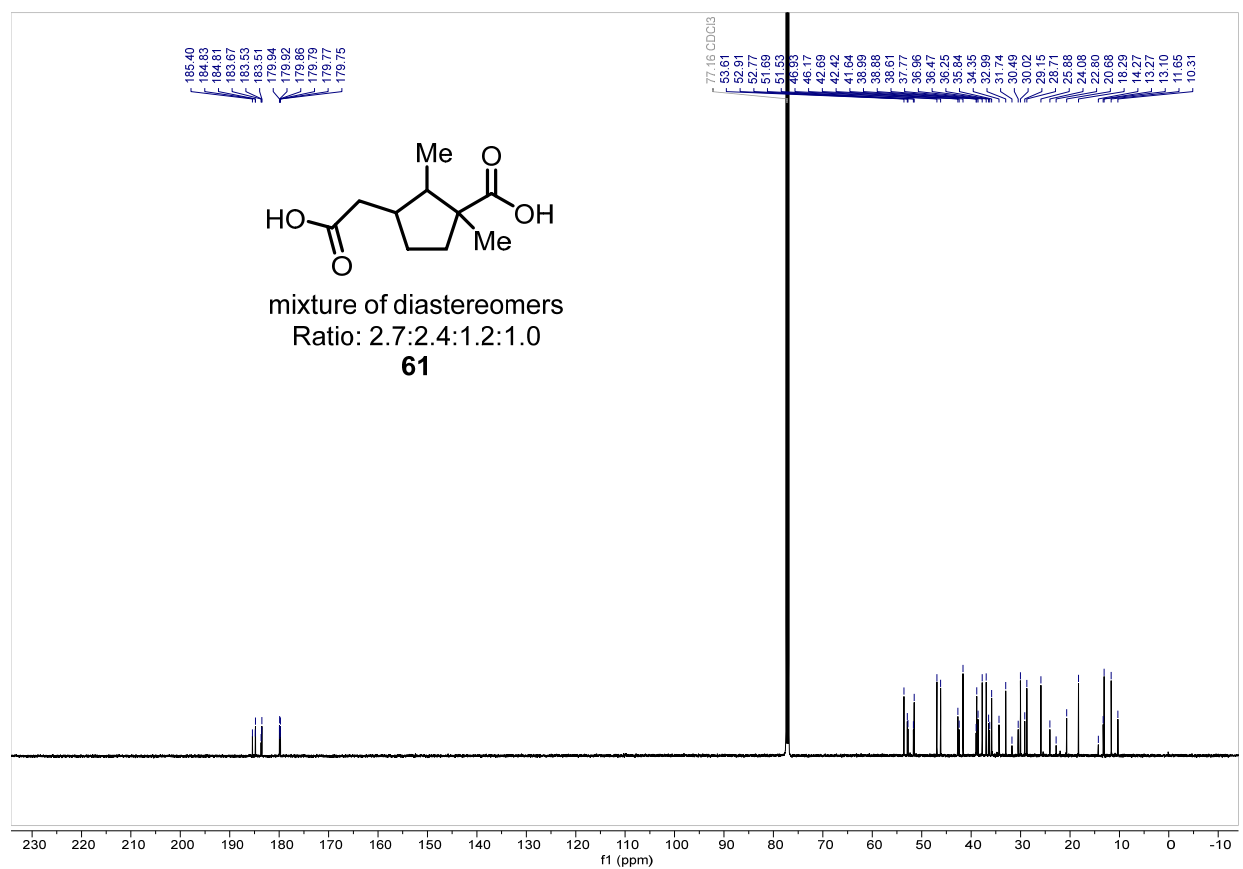

**(3*aS*\*,4*S*\*,5*S*\*,6*aR*\*)-4,5-dimethyl-2-oxohexahydro-2*H*-cyclopenta[*b*]furan-5-carboxylic acid 62**

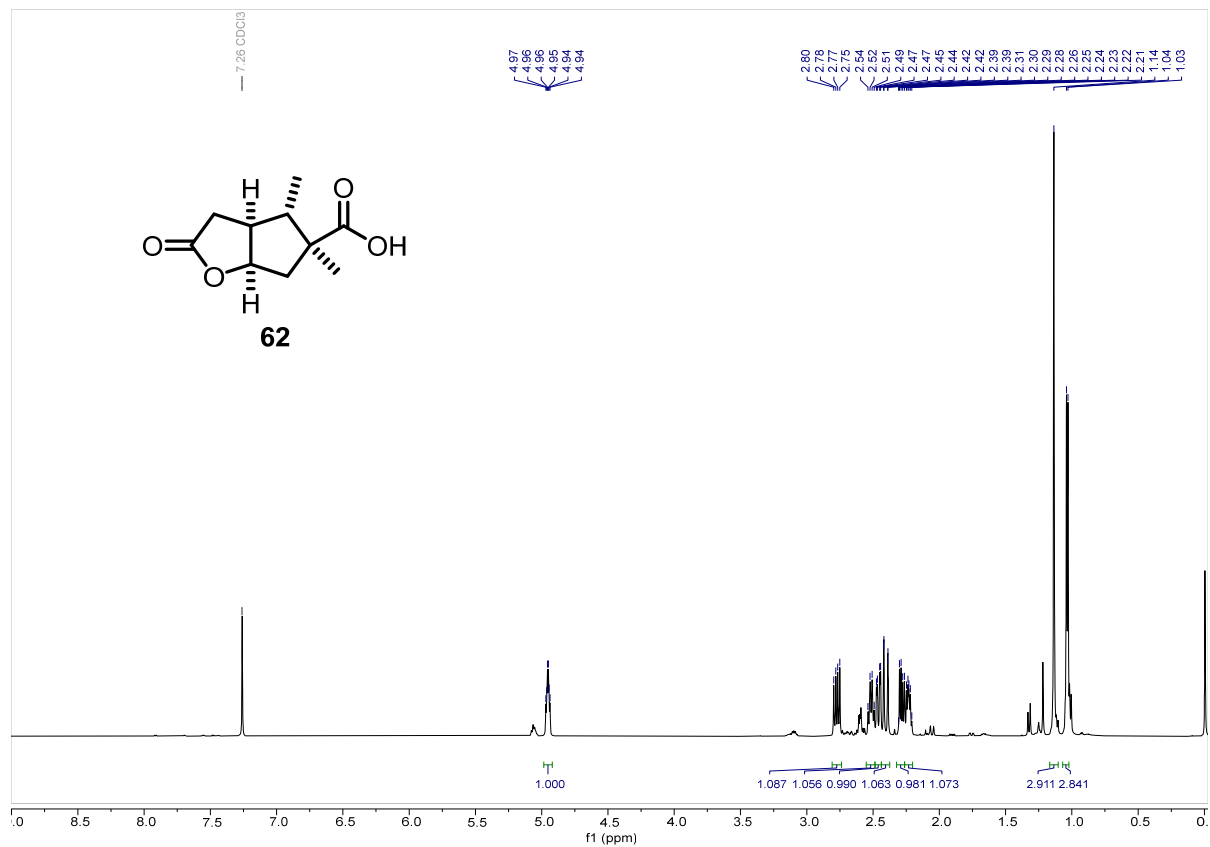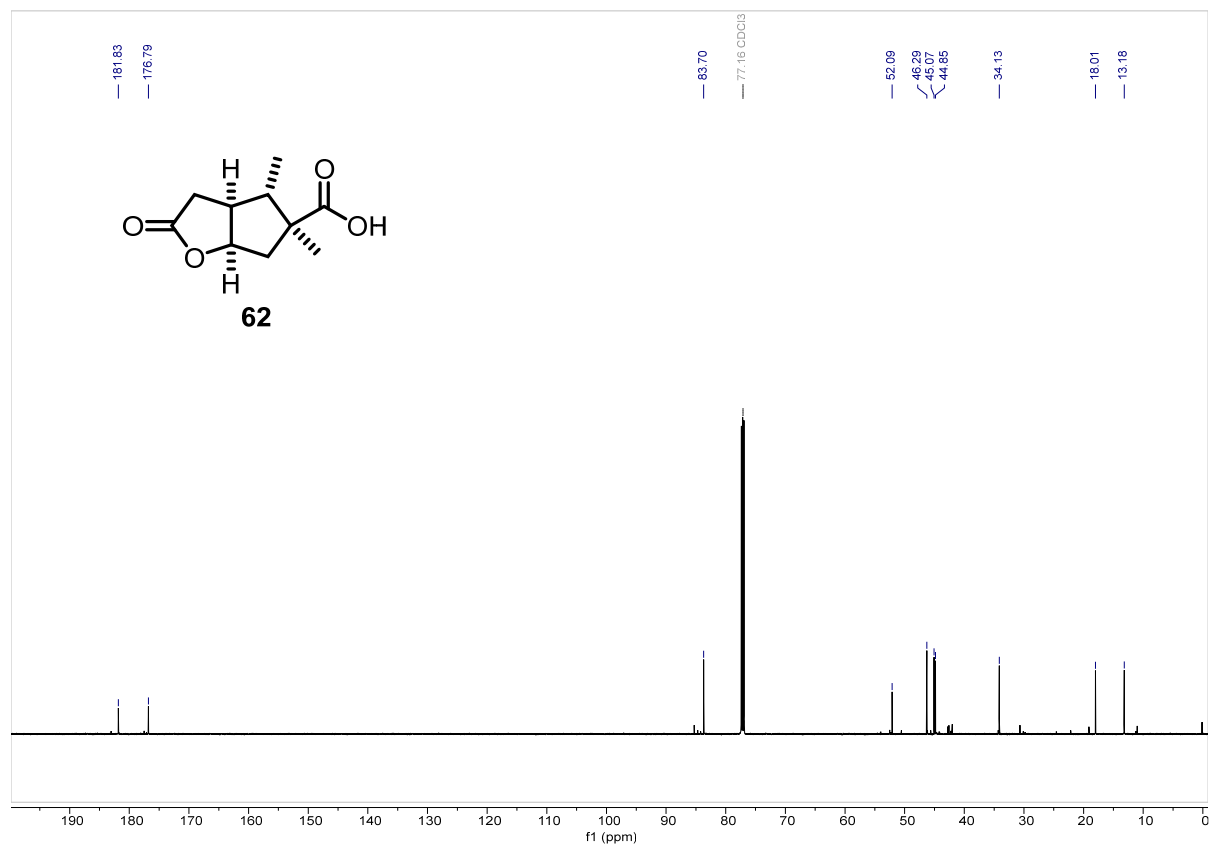

**(3*aS*\*,4*R*\*,5*S*\*,6*aR*\*)-4,5-dimethyl-2-oxohexahydro-2*H*-cyclopenta[*b*]furan-5-carboxylic acid 63**

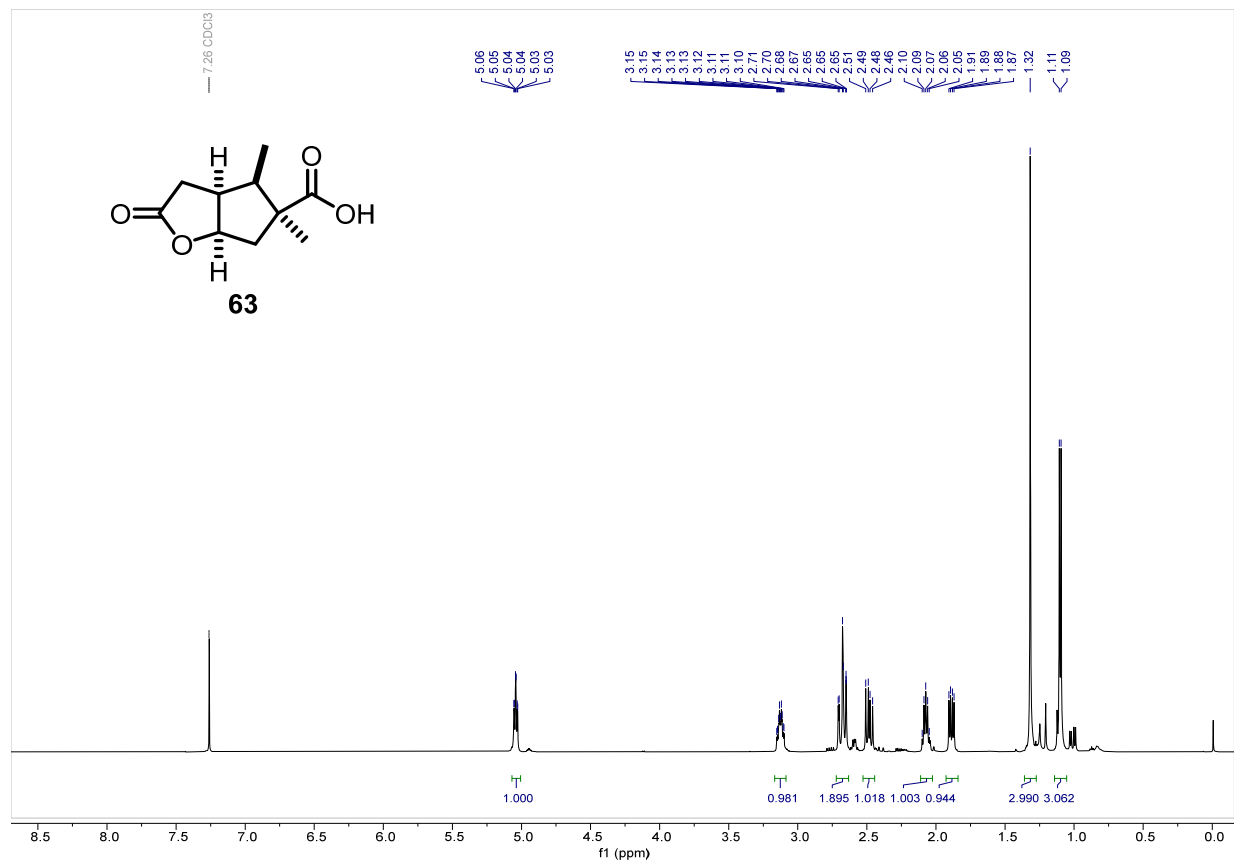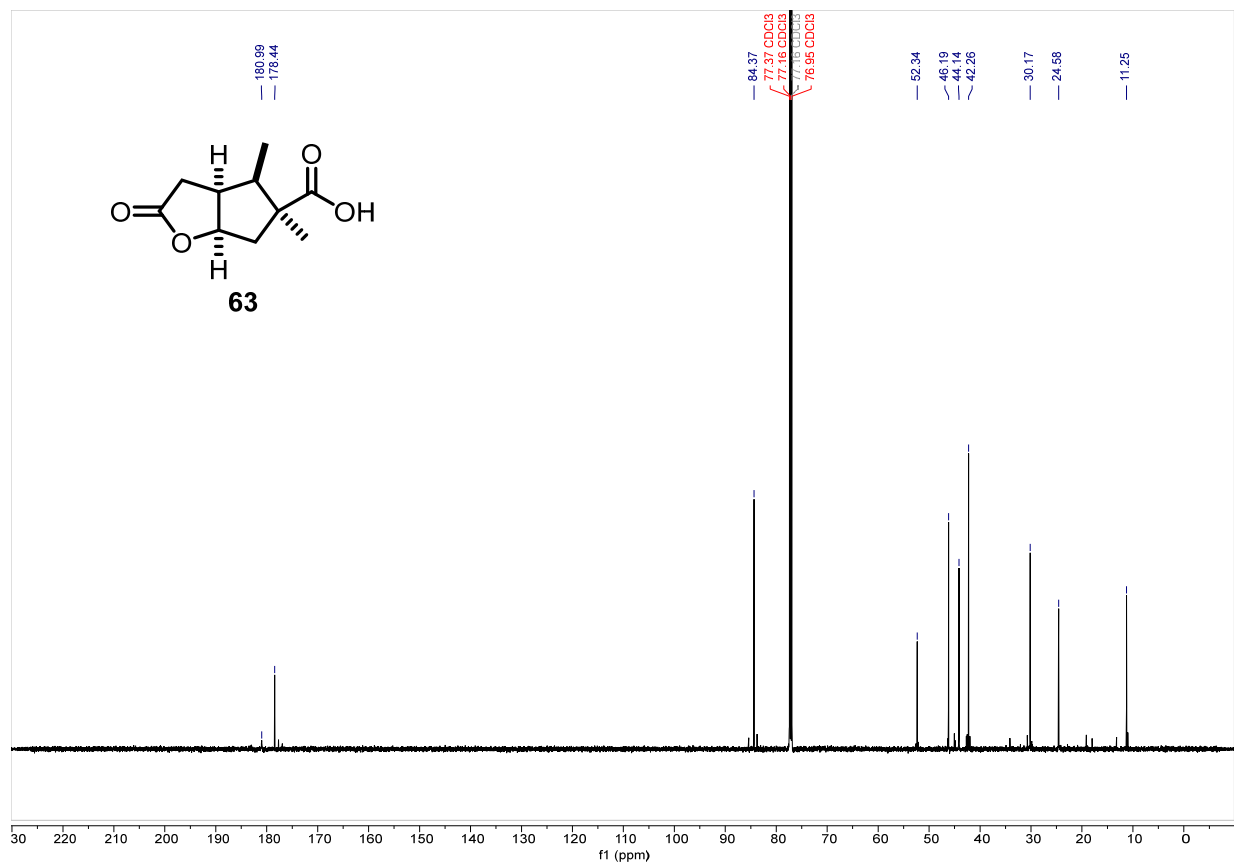

**(3*aS*\*,4*R*\*,5*S*\*,6*aR*\*)-5-hydroxy-4,5-dimethylhexahydro-2H-cyclopenta[b]furan-2-one, myrotheciumone A 64**

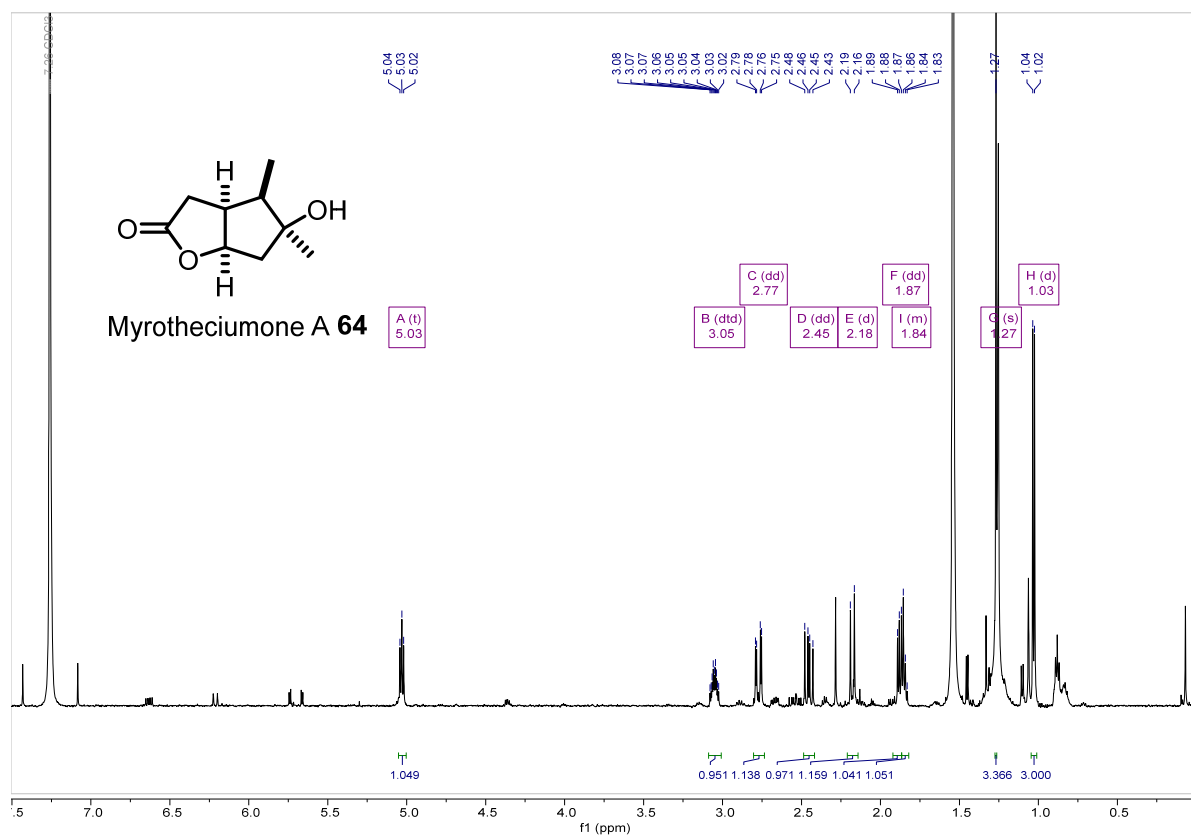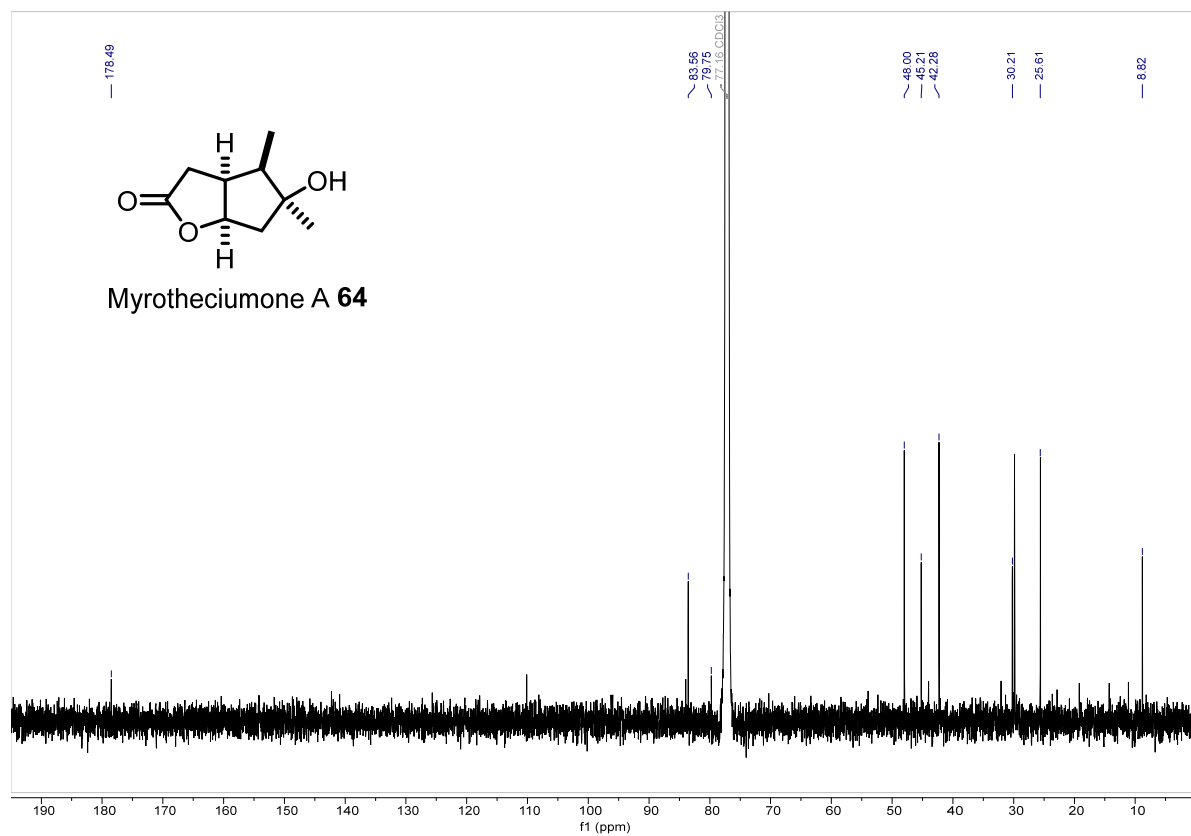



# 3-(3-Oxo-1,3-dihydroisobenzofuran-1-yl)propanoic acid 32b

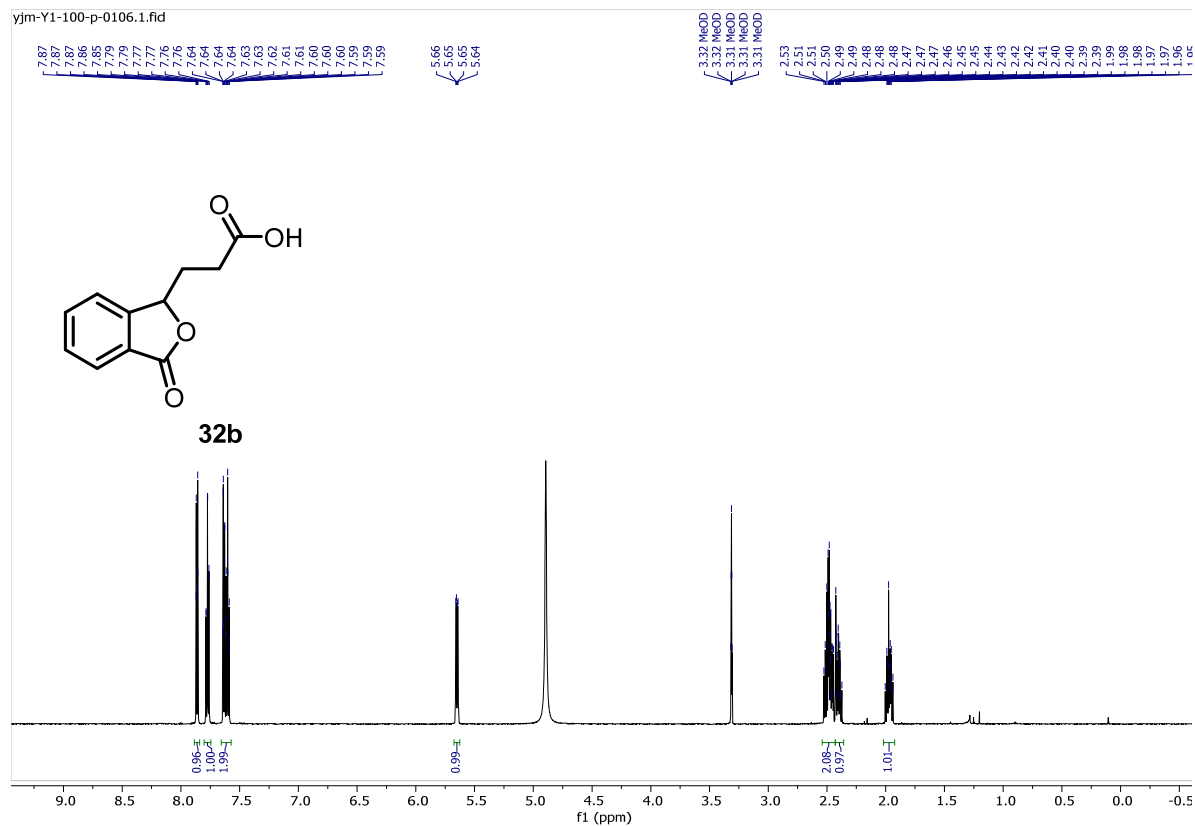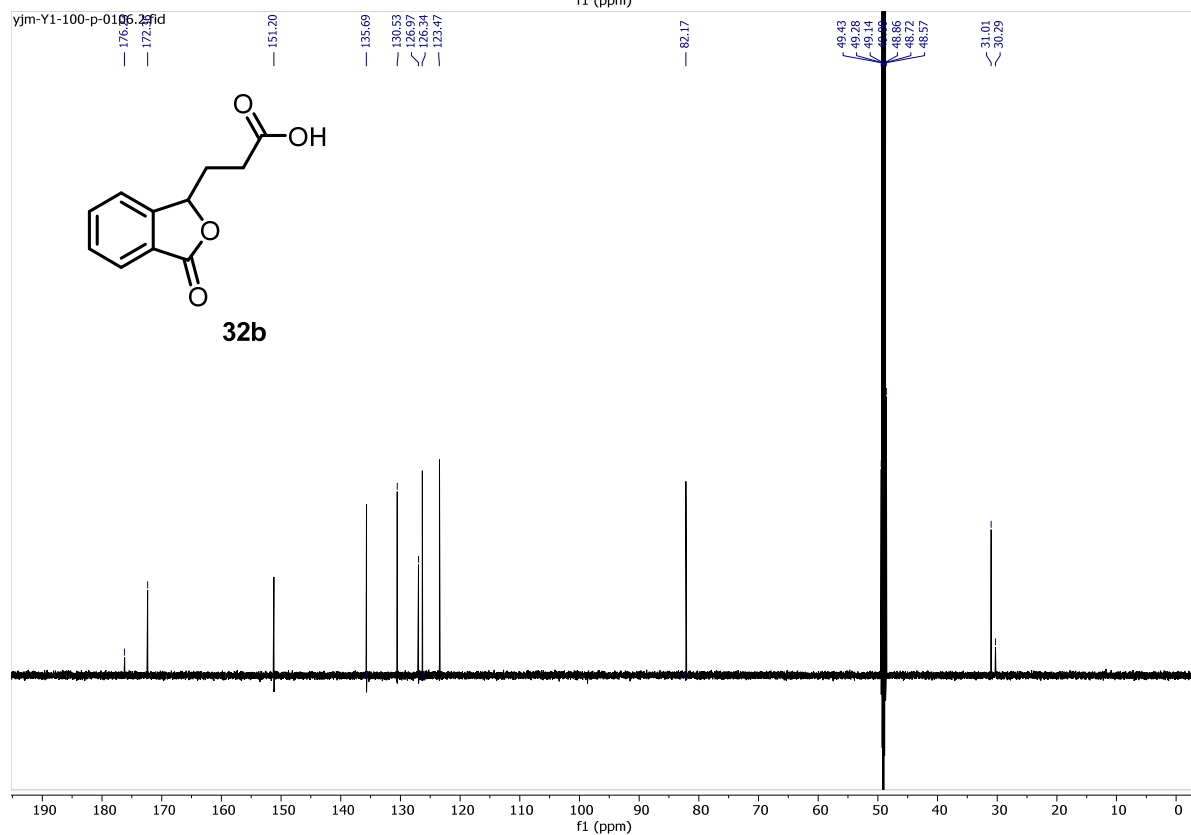

### 3-(3-Oxo-1,3-dihydroisobenzofuran-1-yl)propyl 2,3-dihydroxybenzoate, pedicellosine 65

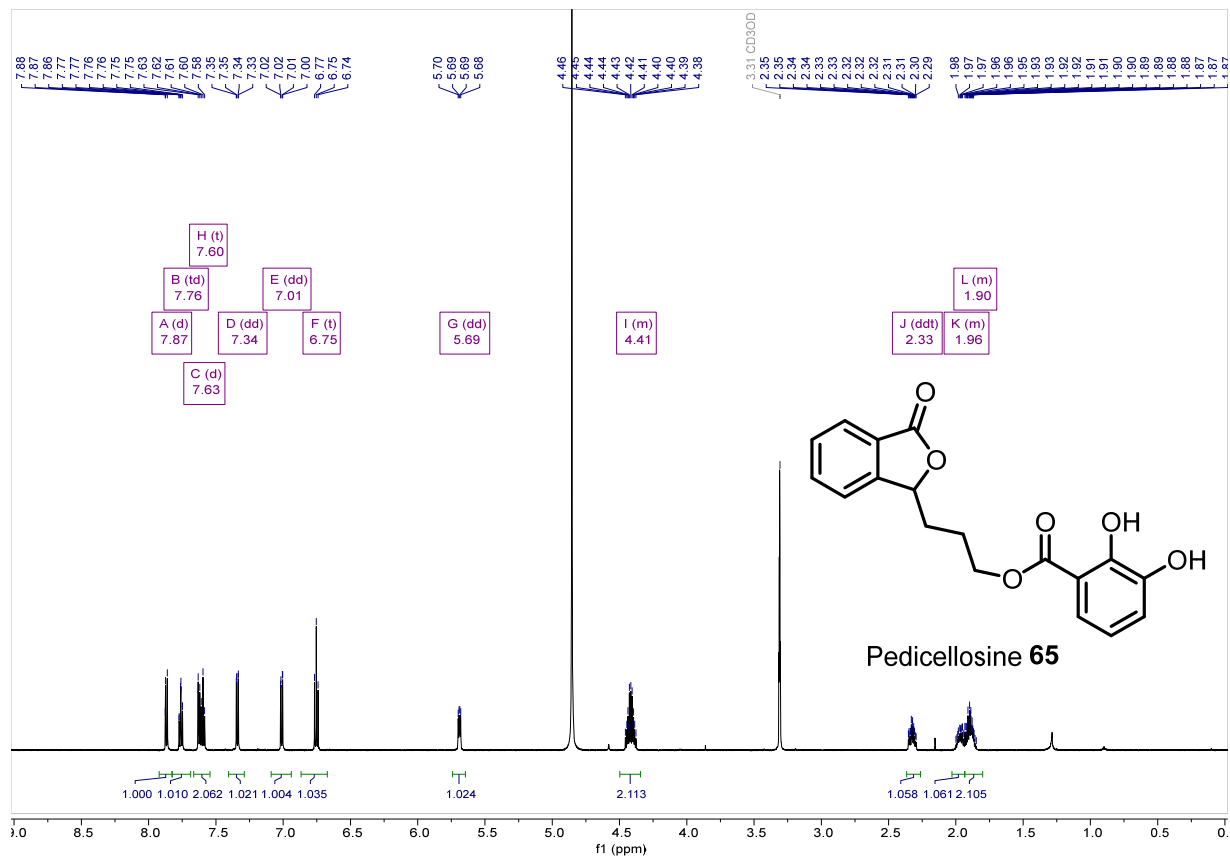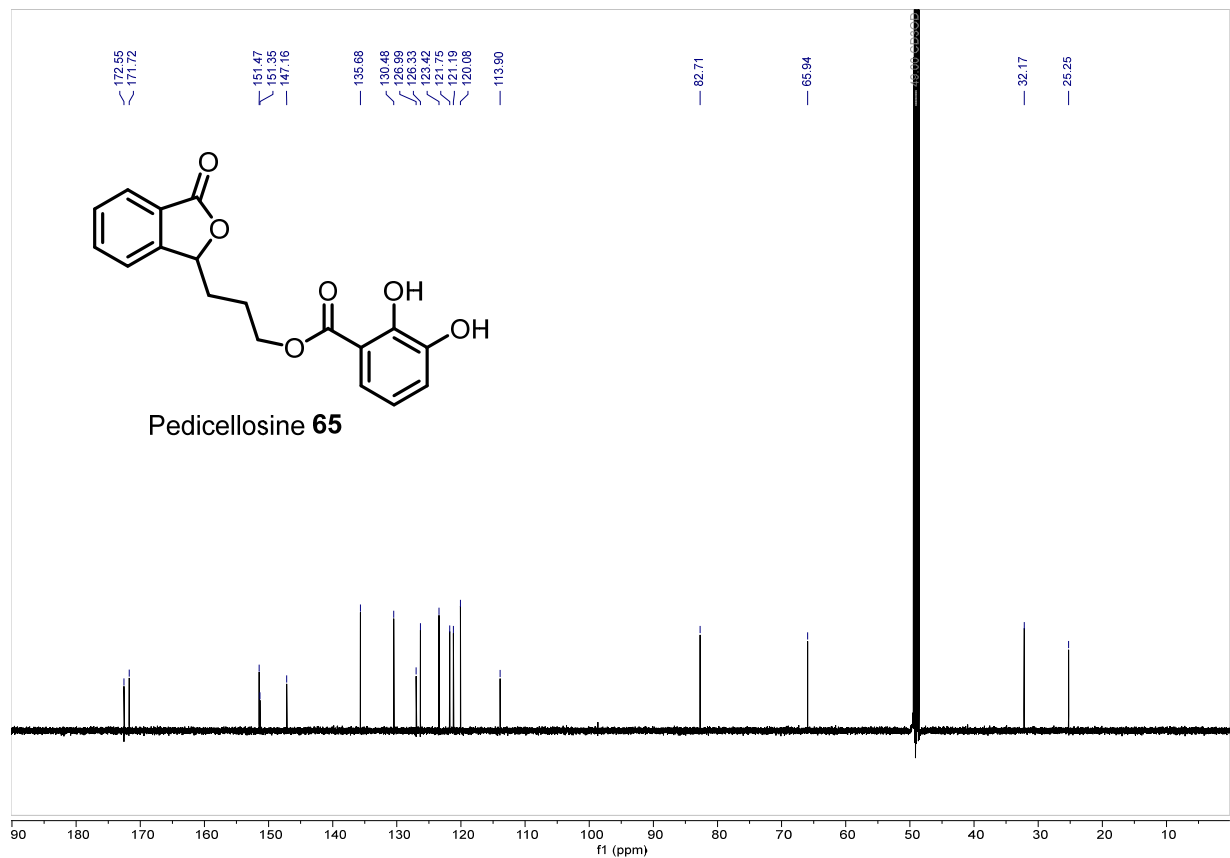

**(E)-hex-2-enedioic acid 5**

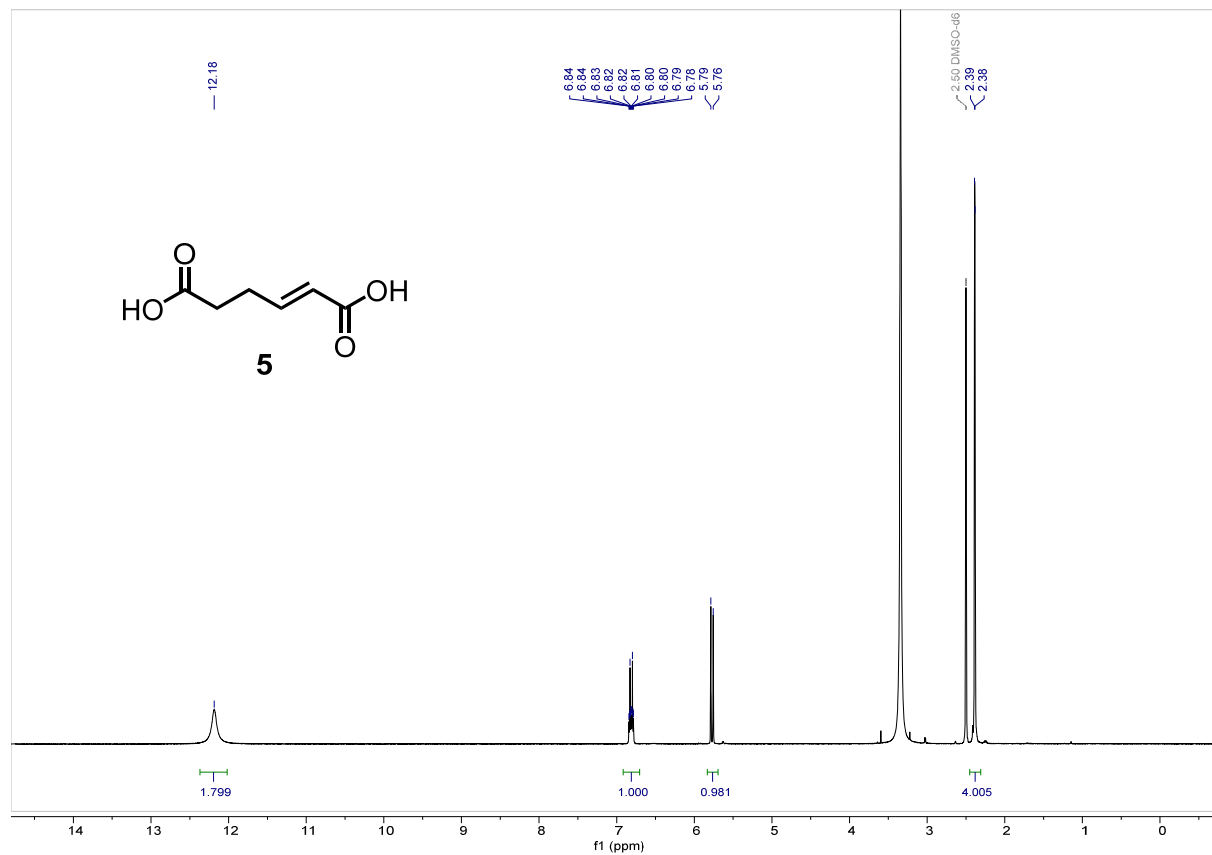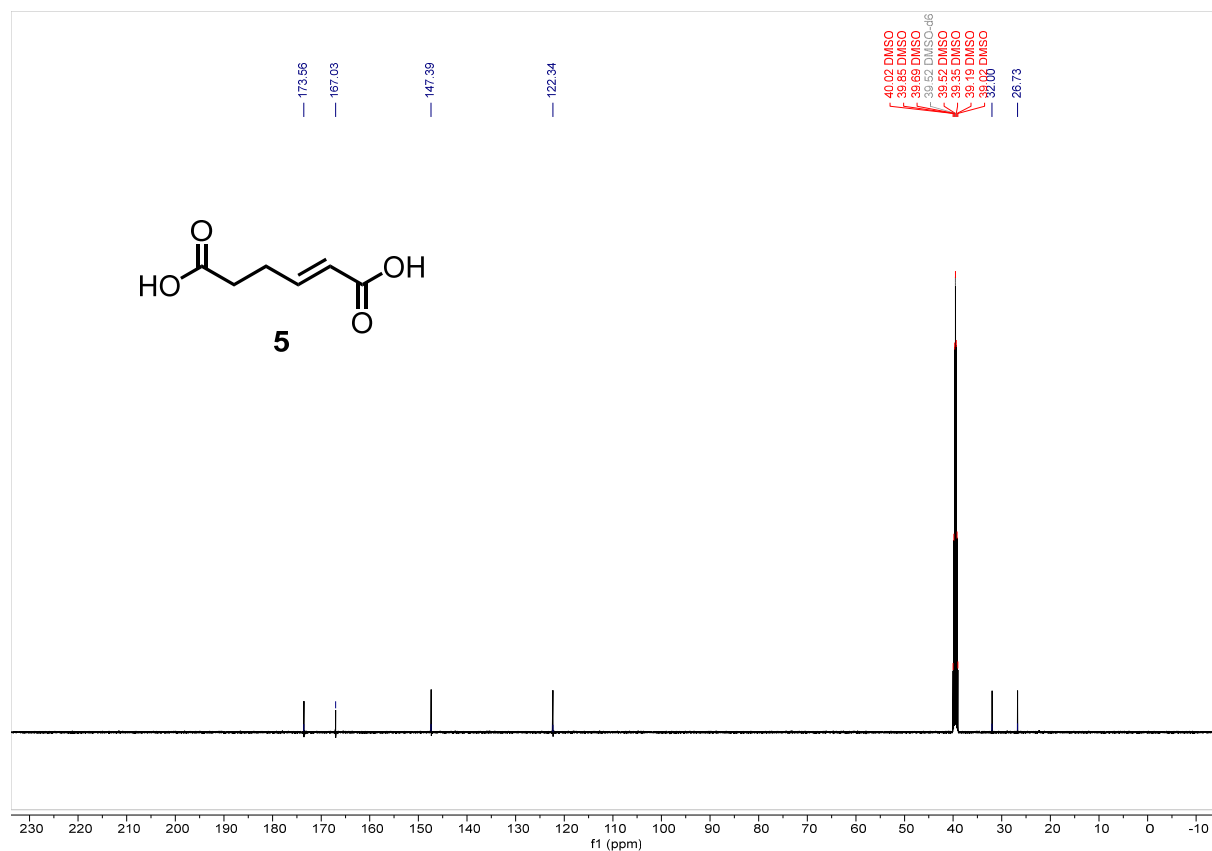

**(E)-hept-2-enedioic acid S5**

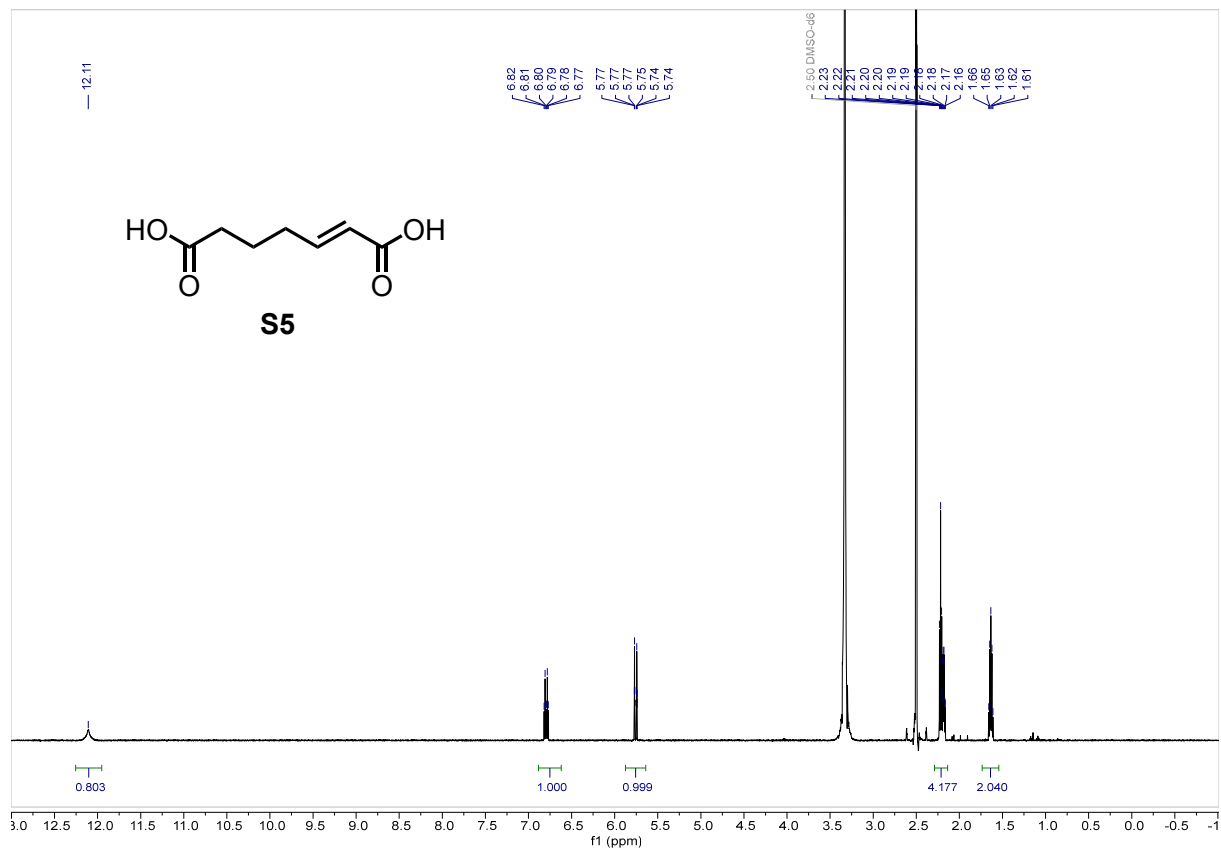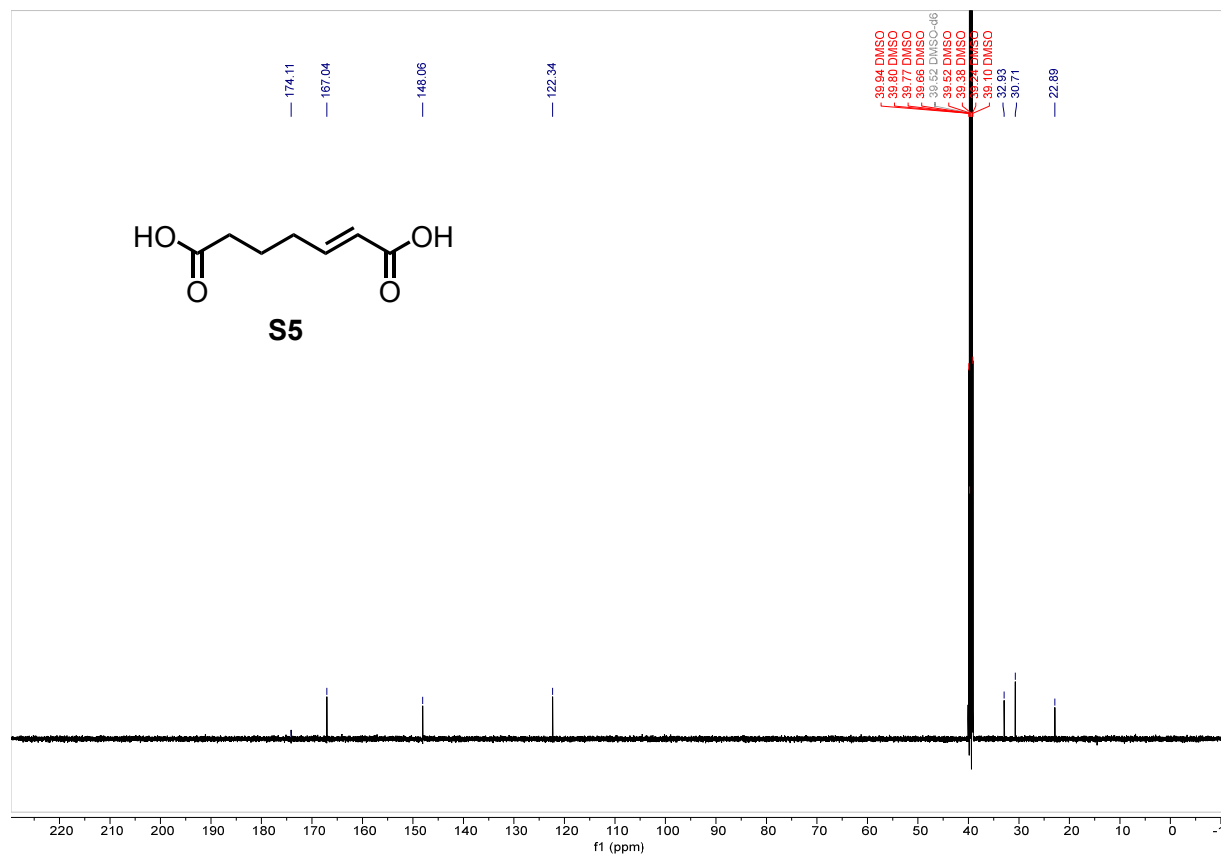

## 5. References

1. L. C. Kao, A. Sen, Platinum(II) Catalysed Selective Remote Oxidation of Unactivated C–H Bonds in Aliphatic Carboxylic Acids. *J. Chem. Soc., Chem. Commun.* 1242–1243 (1991).
2. B. D. Dangel, J. A. Johnson, D. Sames, Selective functionalization of amino acids in water: A synthetic method via catalytic C–H bond activation. *J. Am. Chem. Soc.* **123**, 8149–8150 (2001).
3. R. Giri, N. Mangel, J. J. Li, D. H. Wang, S. P. Breazzano, L. B. Saunders, J. Q. Yu, Palladium-catalyzed methylation and arylation of  $sp^2$  and  $sp^3$  C–H bonds in simple carboxylic acids. *J. Am. Chem. Soc.* **129**, 3510–3511 (2007).
4. Z. Zhuang, C. B. Yu, G. Chen, Q. F. Wu, Y. Hsiao, C. L. Joe, J. X. Qiao, M. A. Poss, J. Q. Yu, Ligand-Enabled  $\beta$ -C( $sp^3$ )–H Olefination of Free Carboxylic Acids. *J. Am. Chem. Soc.* **140**, 10363–10367 (2018).
5. Z. Zhuang, A. N. Herron, Z. Fan, J. Q. Yu, Ligand-Enabled Monoselective  $\beta$ -C( $sp^3$ )–H Acyloxylation of Free Carboxylic Acids Using a Practical Oxidant. *J. Am. Chem. Soc.* **142**, 6769–6776 (2020).
6. Z. Zhuang, J. Q. Yu, Lactonization as a general route to  $\beta$ -C( $sp^3$ )–H functionalization. *Nature*. **577**, 656–659 (2020).
7. Z. Zhuang, A. N. Herron, J. Q. Yu, Synthesis of Cyclic Anhydrides via Ligand-Enabled C–H Carbonylation of Simple Aliphatic Acids. *Angew. Chem. Int. Ed.* **60**, 16382–16387 (2021).
8. K. K. Ghosh, M. van Gemmeren, Pd-Catalyzed  $\beta$ -C( $sp^3$ )–H Arylation of Propionic Acid and Related Aliphatic Acids. *Chemistry - A European Journal*. **23**, 17697–17700 (2017).
9. K. K. Ghosh, A. Uttry, A. Koldemir, M. Ong, M. van Gemmeren, Direct  $\beta$ -C( $sp^3$ )–H acetoxylation of aliphatic carboxylic acids. *Org. Lett.* **21**, 7154–7157 (2019).
10. K. K. Ghosh, A. Uttry, F. Ghiringhelli, A. Mondal, M. van Gemmeren, Ligand-Enabled  $\gamma$ -C( $sp^3$ )–H Olefination of Free Carboxylic Acids. *Angew. Chem. Int. Ed.* **59**, 12848–12852 (2020).
11. F. Ghiringhelli, A. Uttry, K. K. Ghosh, M. van Gemmeren, Direct  $\beta$ - and  $\gamma$ -C( $sp^3$ )–H Alkynylation of Free Carboxylic Acids. *Angew. Chem. Int. Ed.* **59**, 23127–23131 (2020).
12. A. Uttry, S. Mal, M. van Gemmeren, Late-Stage  $\beta$ -C( $sp^3$ )–H Deuteration of Carboxylic Acids. *J. Am. Chem. Soc.* **143**, 10895–10901 (2021).
13. Z. Wang, L. Hu, N. Chekshin, Z. Zhuang, S. Qian, J. X. Qiao, J.-Q. Yu, Ligand-controlled divergent dehydrogenative reactions of carboxylic acids via C–H activation. *Science*. **374**, 1281–1285 (2021).
14. M. S. Chen, M. C. White, A Predictably Selective Aliphatic C–H Oxidation Reaction for Complex Molecule Synthesis. *Science*. **318**, 783–787 (2007).
15. L. Vicens, M. Bietti, M. Costas, General Access to Modified  $\alpha$ -Amino Acids by Bioinspired Stereoselective  $\gamma$ -C–H Bond Lactonization. *Angew. Chem. Int. Ed.* **60**, 4740–4746 (2021).
16. J. Schwarz, B. König, Decarboxylative reactions with and without light—a comparison. *Green Chemistry*. **20**, 323–361 (2018).

17. S. K. Sartori, M. A. N. Diaz, G. Diaz-Muñoz, Lactones: Classification, synthesis, biological activities, and industrial applications. *Tetrahedron*. **84**, 132001–132039 (2021).
18. M. Seitz, O. Reiser, Synthetic approaches towards structurally diverse  $\gamma$ -butyrolactone natural-product-like compounds. *Current Opinion in Chemical Biology*. **9** (2005), pp. 285–292.
19. E. J. Corey, M. C. Kang, M. C. Desai, A. K. Ghosh, I. N. Houpiis, Total synthesis of (+-)-ginkgolide B. *J. Am. Chem. Soc.* **110**, 649–651 (1988).
20. M. T. Crimmins, J. M. Pace, P. G. Nantermet, A. S. Kim-Meade, J. B. Thomas, S. H. Watterson, A. S. Wagman, The total synthesis of ( $\pm$ )-ginkgolide B. *J. Am. Chem. Soc.* **122**, 8453–8463 (2000).
21. E. J. Corey, W. G. Su, Total synthesis of a C15 ginkgolide, (+-)-bilobalide. *J. Am. Chem. Soc.* **109**, 7534–7536 (1987).
22. M. A. Baker, R. M. Demoret, M. Ohtawa, R. A. Shenvi, Concise asymmetric synthesis of (-)-bilobalide. *Nature*. **575**, 643–646 (2019).
23. E. J. Corey, H. L. Pearce, Total synthesis of picrotoxinin. *J. Am. Chem. Soc.* **101**, 5841–5843 (1979).
24. B. M. Trost, M. J. Krische, General Strategy for the Asymmetric Synthesis of the Picrotoxanes. *J. Am. Chem. Soc.* **118**, 233–234 (1996).
25. S. W. M. Crossley, G. Tong, M. J. Lambrecht, H. E. Burdge, R. A. Shenvi, Synthesis of (-)-Picrotoxinin by Late-Stage Strong Bond Activation. *J. Am. Chem. Soc.* **142**, 11376–11381 (2020).
26. E. Lee, C. H. Yoon, Y. Sung, Y. K. Kim, M. Yun, S. Kim, Total Synthesis of (+)-Cladantholide and (-)-Estafiatin: 5-Exo, 7-Endo Radical Cyclization Strategy for the Construction of Guaianolide Skeleton. *J. Am. Chem. Soc.* **119**, 8391–8392 (1997).
27. G. Shabir, A. Saeed, H. R. El-Seedi, Natural isocoumarins: Structural styles and biological activities, the revelations carry on. *Phytochemistry*. **181**, 112568–112787 (2021).
28. A. D. Kinghorn, H. Falk, S. Gibbons, J. Kobayashi, Eds., *Progress in the Chemistry of Organic Natural Products* (Springer Nature, 2017), vol. 104.
29. F. Zaragoza Dörwald, *Side Reactions in Organic Synthesis: A Guide to Successful Synthesis Design* (Wiley, 2004).
30. X. Chen, J. J. Li, X. S. Hao, C. E. Goodhue, J. Q. Yu, Palladium-catalyzed alkylation of aryl C-H bonds with  $sp^3$  organotin reagents using benzoquinone as a crucial promoter. *J. Am. Chem. Soc.* **128**, 78–79 (2006).
31. G. Xia, J. Weng, L. Liu, P. Verma, Z. Li, J. Q. Yu, Reversing conventional site-selectivity in C( $sp^3$ )-H bond activation. *Nature Chemistry*. **11**, 571–577 (2019).
32. P. Novák, A. Correa, J. Gallardo-Donaire, R. Martin, Synergistic palladium-catalyzed C( $sp^3$ )-H Activation/C( $sp^3$ )-O bond formation: A direct, step-economical route to benzolactones. *Angew. Chem. Int. Ed.* **50**, 12236–12239 (2011).
33. J. M. Lee, S. Chang, Pt-Catalyzed  $sp^3$  C-H bond activation of *o*-alkyl substituted aromatic carboxylic acid derivatives for the formation of aryl lactones. *Tetrahedron Letters*. **47**, 1375–1379 (2006).

34. T. Lin, G. Wang, W. Shan, D. Zeng, R. Ding, X. Jiang, D. Zhu, X. Liu, S. Yang, H. Chen, Myrotheciumones: Bicyclic cytotoxic lactones isolated from an endophytic fungus of *Ajuga decumbens*. *Bioorganic and Medicinal Chemistry Letters*. **24**, 2504–2507 (2014).
35. S. Begum, T. K. Chakraborty, Cp<sub>2</sub>TiCl-Mediated Reductive Cyclization: Total Synthesis of Pestalotiolactone A, Myrotheciumone A, and Scabrol A. *J. Org. Chem.* **86**, 11812–11821 (2021).
36. S. N. Khan, M. K. Zaman, R. Li, Z. Sun, A General Method for Photocatalytic Decarboxylative Hydroxylation of Carboxylic Acids. *J. Org. Chem.* **85**, 5019–5026 (2020).
37. E. M. Mpondo, J. Garcia, A. J. Chulia, New Phthalides from *Gentiana pedicellata*. *Planta Medica*. **53**, 297–298 (1987).
38. Q. Gao, S. B. Li, Synthesis of 3-(3-Hydroxypropyl)-phthalide and Pedicellosine. *Chinese Chemical Letters*. **10**, 109–110 (1999).
39. Z. Li, Z. Wang, N. Chekshin, S. Qian, J. X. Qiao, P. T. Cheng, K.-S. Yeung, W. R. Ewing, J.-Q. Yu, A tautomeric ligand enables directed C–H hydroxylation with molecular oxygen. *Science*. **372**, 1452–1457 (2021).
40. O. S. Shneider, E. Pisarevsky, P. Fristrup, A. M. Szpilman, Oxidative umpolung  $\alpha$ -alkylation of ketones. *Org. Lett.* **17**, 282–285 (2015).
41. M. Azimioara, P. Alper, C. Cow, D. Mutnick, V. Nikulin, G. Lelais, J. Mecom, M. McNeill, P. Y. Michellys, Z. Wang, E. Reding, M. Paliotti, J. Li, D. Bao, J. Zoll, Y. Kim, M. Zimmerman, T. Groessl, T. Tuntland, S. B. Joseph, P. McNamara, H. M. Seidel, R. Epple, Novel tricyclic pyrazolopyrimidines as potent and selective GPR119 agonists. *Bioorganic and Medicinal Chemistry Letters*. **24**, 5478–5483 (2014).
42. D. D. Bume, C. R. Pitts, R. T. Jokhai, T. Lectka, Direct, visible light-sensitized benzylic C–H fluorination of peptides using dibenzosuberone: selectivity for phenylalanine-like residues. *Tetrahedron*. **72**, 6031–6036 (2016).
43. J. T. Pinhey, E. Ritchie, W. C. Taylor, The Chemical Constituents Of *Himantandra* (*Galbulimima*) Species. *Australian Journal of Chemistry*. **14**, 106–134 (1961).
44. J. le Nôtre, D. van Mele, C. G. Frost, A new method for constructing quaternary carbon centres: Tandem rhodium-catalysed 1,4-addition/intramolecular cyclisation. *Advanced Synthesis and Catalysis*. **349**, 432–440 (2007).
45. F. Bonati, G. Minghetti, Mercury(II) Derivatives Of Acetylacetone. *Journal of Organometallic Chemistry*. **22**, 5–10 (1970).
